# Supplementary material for: Are you also what your mother eats? Distinct proteomic portrait as a result of maternal high-fat diet in the cerebral cortex of the adult mouse
Source: PubMed Central journal article supplement (PMC5399160; doi:10.1038/ijo.2015.35), 2015-04-21
Supplement: ijo201535x3.pdf [file ijo201535x3.pdf]

| Accession | Description                                                                                                                    | ΣCoverage | Σ# Proteins | Σ# Unique Peptides | Σ# Peptides | Σ# PSMs | 114/113 | 115/113 | 115/114 | 116/113 | 116/114 | 117/113 | 117/114 | 118/113 | 118/114 | 119/113 | 119/114 | 121/113 | 121/114 | MW [kDa] | calc. pI |
|-----------|--------------------------------------------------------------------------------------------------------------------------------|-----------|-------------|--------------------|-------------|---------|---------|---------|---------|---------|---------|---------|---------|---------|---------|---------|---------|---------|---------|----------|----------|
| Q8R0J1    | Pleckstrin homology domain-containing family G member 6<br>OS=Mus musculus<br>GN=Plekbg6 PE=1<br>SV=2 -<br>[PKHG6_MOUSE]       | 1.78      | 1           | 1                  | 1           | 1       | 0.09    | 0.13    | 1.48    | 0.09    | 1.00    | 0.10    | 1.16    | 0.16    | 1.79    | 0.13    | 1.48    | 0.11    | 1.26    | 89.09    | 7.53     |
| Q9DCD6    | Gamma-aminobutyric acid receptor-associated protein<br>OS=Mus musculus<br>GN=Gabarap PE=1<br>SV=2 -<br>[GBRAP_MOUSE]           | 34.19     | 2           | 1                  | 4           | 21      | 0.82    | 0.41    | 0.50    | 0.69    | 0.84    | 0.32    | 0.39    | 0.28    | 0.34    | 0.28    | 0.34    | 0.27    | 0.32    | 13.91    | 8.79     |
| A2AQ34    | Ubiquitin carboxyl-terminal hydrolase 20 (Fragment)<br>OS=Mus musculus<br>GN=Usp20 PE=2<br>SV=1 -<br>[A2AQ34_MOUSE]            | 21.21     | 5           | 1                  | 1           | 1       | 0.74    | 0.81    | 1.09    | 0.80    | 1.09    | 0.58    | 0.78    | 0.35    | 0.47    | 0.60    | 0.81    | 0.57    | 0.78    | 6.98     | 5.19     |
| Q3UGR5    | Haloacid dehalogenase-like hydrolase domain-containing protein 2<br>OS=Mus musculus<br>GN=Hhd2 PE=1<br>SV=2 -<br>[HDHD2_MOUSE] | 75.68     | 4           | 13                 | 13          | 120     | 1.16    | 0.85    | 0.67    | 0.81    | 0.70    | 0.36    | 0.31    | 0.35    | 0.27    | 0.35    | 0.30    | 0.39    | 0.34    | 28.71    | 6.05     |
| Q11136    | Xaa-Pro dipeptidase<br>OS=Mus musculus<br>GN=Pepd PE=2<br>SV=3 -<br>[PEPD_MOUSE]                                               | 26.57     | 2           | 12                 | 12          | 28      | 1.02    | 0.88    | 0.87    | 0.80    | 0.84    | 0.38    | 0.34    | 0.35    | 0.34    | 0.36    | 0.34    | 0.33    | 0.30    | 54.99    | 5.78     |
| P61965    | WD repeat-containing protein 5<br>OS=Mus musculus<br>GN=Wdr5 PE=1<br>SV=1 -<br>[WDR5_MOUSE]                                    | 19.46     | 2           | 4                  | 4           | 9       | 0.99    | 0.65    | 0.71    | 0.92    | 0.91    | 0.38    | 0.37    | 0.37    | 0.35    | 0.40    | 0.38    | 0.45    | 0.44    | 36.57    | 8.27     |
| E9Q1B3    | Uncharacterized protein<br>OS=Mus musculus<br>GN=Gm7275 PE=4<br>SV=1 -<br>[E9Q1B3_MOUSE]                                       | 4.86      | 1           | 1                  | 1           | 2       | 1.07    | 2.09    | 1.96    | 0.89    | 0.84    | 0.40    | 0.37    | 0.37    | 0.35    | 0.39    | 0.37    | 0.41    | 0.39    | 29.07    | 7.11     |
| P05202    | Aspartate aminotransferase, mitochondrial<br>OS=Mus musculus<br>GN=Got2 PE=1<br>SV=1 -<br>[AATM_MOUSE]                         | 80.23     | 1           | 38                 | 39          | 843     | 1.01    | 0.84    | 0.87    | 0.83    | 0.83    | 0.36    | 0.37    | 0.37    | 0.38    | 0.37    | 0.38    | 0.42    | 0.43    | 47.38    | 9.00     |
| Q3TTY0    | Isoform 3 of Phospholipase B1, membrane-associated<br>OS=Mus musculus<br>GN=Plb1 -<br>[PLB1_MOUSE]                             | 1.08      | 2           | 1                  | 1           | 1       | 1.42    | 0.86    | 0.60    | 0.97    | 0.68    | 0.52    | 0.36    | 0.38    | 0.27    | 0.39    | 0.28    | 0.77    | 0.54    | 102.64   | 6.96     |
| P61963    | DDB1- and CUL4-associated factor 7<br>OS=Mus musculus<br>GN=Dcaf7 PE=2<br>SV=1 -<br>[DCAF7_MOUSE]                              | 19.88     | 1           | 5                  | 5           | 10      | 1.03    | 0.83    | 0.80    | 0.88    | 0.86    | 0.34    | 0.34    | 0.38    | 0.37    | 0.43    | 0.42    | 0.49    | 0.47    | 38.90    | 5.52     |

|          |                                                                                                           |       |   |    |    |     |      |       |      |      |      |      |      |      |      |      |      |      |      |       |      |
|----------|-----------------------------------------------------------------------------------------------------------|-------|---|----|----|-----|------|-------|------|------|------|------|------|------|------|------|------|------|------|-------|------|
| Q9DBB8   | Trans-1,2-dihydrobenzene-1,2-diol dehydrogenase<br>OS=Mus musculus<br>GN=Dhbdh PE=2 SV=1<br>-[DHDH_MOUSE] | 33.03 | 1 | 9  | 9  | 16  | 1.24 | 0.92  | 0.75 | 0.87 | 0.72 | 0.36 | 0.31 | 0.39 | 0.32 | 0.39 | 0.35 | 0.52 | 0.44 | 36.28 | 6.44 |
| P29974   | cGMP-gated cation channel alpha-1<br>OS=Mus musculus<br>GN=Cnga1 PE=2 SV=2<br>-[CNGA1_MOUSE]              | 2.34  | 1 | 1  | 1  | 1   | 5.68 | 10.29 | 1.81 | 0.38 | 0.07 | 0.31 | 0.05 | 0.39 | 0.07 | 0.41 | 0.07 | 0.26 | 0.05 | 79.41 | 7.58 |
| P05201   | Aspartate aminotransferase, cytoplasmic<br>OS=Mus musculus<br>GN=Got1 PE=1 SV=3<br>-[AATC_MOUSE]          | 75.79 | 2 | 35 | 35 | 491 | 1.00 | 0.91  | 0.89 | 0.83 | 0.83 | 0.38 | 0.39 | 0.40 | 0.39 | 0.41 | 0.40 | 0.44 | 0.44 | 46.22 | 7.14 |
| Q9CQ65   | S-methyl-5'-thioadenosine phosphorylase<br>OS=Mus musculus<br>GN=Mtap PE=2 SV=1<br>-[MTAP_MOUSE]          | 38.52 | 1 | 8  | 8  | 22  | 1.17 | 1.00  | 0.84 | 0.88 | 0.74 | 0.41 | 0.35 | 0.40 | 0.32 | 0.43 | 0.37 | 0.46 | 0.41 | 31.04 | 7.14 |
| O55208   | Factor in the germline alpha<br>OS=Mus musculus<br>GN=Figla PE=2 SV=1<br>-[FIGLA_MOUSE]                   | 8.76  | 1 | 1  | 1  | 1   | 1.19 | 0.86  | 0.72 | 1.07 | 0.90 | 0.34 | 0.28 | 0.40 | 0.34 | 0.43 | 0.36 | 0.62 | 0.52 | 21.52 | 7.91 |
| Q8VEB4   | Group XV phospholipase A2<br>OS=Mus musculus<br>GN=Pla2g15 PE=1 SV=1<br>-[PAG15_MOUSE]                    | 11.65 | 1 | 4  | 4  | 8   | 1.03 | 1.02  | 0.95 | 0.90 | 0.81 | 0.41 | 0.41 | 0.40 | 0.36 | 0.47 | 0.44 | 0.48 | 0.48 | 47.28 | 6.47 |
| Q8VDK1   | Isoform 2 of Nitrilase homolog 1<br>OS=Mus musculus<br>GN=Nit1<br>-[NIT1_MOUSE]                           | 47.24 | 5 | 10 | 10 | 40  | 1.06 | 0.88  | 0.77 | 0.87 | 0.84 | 0.40 | 0.35 | 0.40 | 0.37 | 0.42 | 0.39 | 0.43 | 0.42 | 31.87 | 7.05 |
| O70494-3 | Isoform 3 of Transcription factor Sp3<br>OS=Mus musculus<br>GN=Sp3<br>-[SP3_MOUSE]                        | 2.23  | 3 | 1  | 1  | 3   | 1.05 | 3.61  | 3.44 | 0.88 | 0.84 | 1.77 | 1.68 | 0.40 | 0.38 | 1.13 | 1.08 | 1.06 | 1.01 | 76.68 | 6.33 |
| Q99KJ6   | Beta-glucuronidase<br>OS=Mus musculus<br>GN=Gusb PE=2 SV=1<br>-[Q99KJ6_MOUSE]                             | 4.40  | 2 | 1  | 1  | 2   | 0.99 | 1.06  | 1.07 | 0.91 | 0.92 | 0.37 | 0.38 | 0.41 | 0.41 | 0.45 | 0.46 | 0.42 | 0.42 | 28.49 | 6.00 |
| D3Z0K8   | Thioredoxin reductase 2, mitochondrial<br>OS=Mus musculus<br>GN=Txnrd2 PE=2 SV=1<br>-[D3Z0K8_MOUSE]       | 31.57 | 7 | 10 | 11 | 36  | 0.97 | 0.83  | 0.83 | 0.81 | 0.82 | 0.41 | 0.41 | 0.41 | 0.36 | 0.36 | 0.38 | 0.43 | 0.43 | 53.04 | 9.04 |
| F6W7I2   | Deoxyhypusine synthase (Fragment)<br>OS=Mus musculus<br>GN=Dhps PE=2 SV=1<br>-[F6W7I2_MOUSE]              | 8.05  | 2 | 1  | 1  | 2   | 1.04 | 1.18  | 1.13 | 0.65 | 0.62 | 0.41 | 0.39 | 0.41 | 0.39 | 0.51 | 0.49 | 0.35 | 0.34 | 16.26 | 7.12 |
| Q8R086   | Sulfite oxidase, mitochondrial<br>OS=Mus musculus<br>GN=Suox PE=1 SV=2<br>-[SUOX_MOUSE]                   | 3.66  | 1 | 1  | 1  | 2   | 0.99 | 0.93  | 0.93 | 1.14 | 1.15 | 0.69 | 0.69 | 0.41 | 0.41 | 0.56 | 0.56 | 0.91 | 0.91 | 60.72 | 6.54 |

|        |                                                                                                                              |       |   |    |    |     |      |      |      |      |      |      |      |      |      |      |      |      |      |        |      |
|--------|------------------------------------------------------------------------------------------------------------------------------|-------|---|----|----|-----|------|------|------|------|------|------|------|------|------|------|------|------|------|--------|------|
| P63005 | Platelet-activating factor acetylhydrolase IB subunit alpha<br>OS=Mus musculus<br>GN=Pafah1b1 PE=1<br>SV=2 -<br>[LIS1_MOUSE] | 56.10 | 3 | 21 | 21 | 128 | 0.99 | 0.77 | 0.79 | 0.84 | 0.84 | 0.38 | 0.39 | 0.41 | 0.42 | 0.42 | 0.41 | 0.45 | 0.44 | 46.64  | 7.37 |
| H3BLA9 | Sentrin-specific protease 6 (Fragment)<br>OS=Mus musculus<br>GN=Senp6 PE=2<br>SV=1 -<br>[H3BLA9_MOUSE]                       | 3.43  | 1 | 1  | 1  | 1   | 1.17 | 1.05 | 0.89 | 0.90 | 0.77 | 0.42 | 0.36 | 0.42 | 0.36 | 0.51 | 0.44 | 0.57 | 0.49 | 23.50  | 5.85 |
| D3YZU6 | Hydroxyacylglutathione hydrolase-like protein<br>OS=Mus musculus<br>GN=Haghl PE=4<br>SV=1 -<br>[D3YZU6_MOUSE]                | 45.53 | 4 | 7  | 7  | 21  | 0.98 | 0.90 | 0.89 | 0.81 | 0.86 | 0.56 | 0.49 | 0.42 | 0.41 | 0.44 | 0.42 | 0.46 | 0.52 | 26.09  | 5.91 |
| G5E8Q8 | MCG115189 OS=Mus musculus<br>GN=Gpr116 PE=4<br>SV=1 -<br>[G5E8Q8_MOUSE]                                                      | 0.89  | 1 | 1  | 1  | 1   | 0.78 | 1.02 | 1.30 | 0.86 | 1.10 | 0.52 | 0.67 | 0.43 | 0.55 | 0.65 | 0.83 | 0.79 | 1.02 | 149.29 | 7.02 |
| P23492 | Purine nucleoside phosphorylase<br>OS=Mus musculus<br>GN=Pnp PE=1<br>SV=2 -<br>[PNPH_MOUSE]                                  | 58.82 | 3 | 13 | 13 | 30  | 1.09 | 0.95 | 0.91 | 0.87 | 0.80 | 0.42 | 0.39 | 0.43 | 0.44 | 0.44 | 0.42 | 0.54 | 0.49 | 32.26  | 6.16 |
| P20108 | Thioredoxin-dependent peroxidase reductase, mitochondrial<br>OS=Mus musculus<br>GN=Prdx3 PE=1<br>SV=1 -<br>[PRDX3_MOUSE]     | 40.47 | 1 | 9  | 9  | 105 | 1.04 | 0.77 | 0.72 | 0.84 | 0.82 | 0.45 | 0.42 | 0.43 | 0.41 | 0.43 | 0.41 | 0.47 | 0.43 | 28.11  | 7.58 |
| Q3UR97 | Protein Snx21<br>OS=Mus musculus<br>GN=Snx21 PE=2<br>SV=1 -<br>[Q3UR97_MOUSE]                                                | 24.24 | 4 | 3  | 3  | 3   | 1.00 | 0.83 | 0.82 | 0.99 | 0.99 | 0.54 | 0.54 | 0.43 | 0.43 | 0.46 | 0.46 | 0.47 | 0.47 | 40.28  | 5.36 |
| Q61532 | Mitogen-activated protein kinase 6<br>OS=Mus musculus<br>GN=Mapk6 PE=1<br>SV=3 -<br>[MK06_MOUSE]                             | 1.39  | 1 | 1  | 1  | 1   | 1.41 | 0.81 | 0.57 | 1.00 | 0.71 | 0.42 | 0.30 | 0.43 | 0.30 | 0.46 | 0.33 | 0.55 | 0.39 | 82.15  | 5.20 |
| Q8C7K6 | Prenylcysteine oxidase-like<br>OS=Mus musculus<br>GN=Pcyox11 PE=2<br>SV=1 -<br>[PCYXL_MOUSE]                                 | 11.92 | 1 | 4  | 4  | 7   | 1.08 | 1.06 | 0.92 | 0.87 | 0.81 | 0.47 | 0.43 | 0.43 | 0.37 | 0.56 | 0.49 | 0.58 | 0.54 | 54.84  | 7.65 |
| Q5M8N0 | CB1 cannabinoid receptor-interacting protein 1<br>OS=Mus musculus<br>GN=Cnrip1 PE=1<br>SV=1 -<br>[CNRP1_MOUSE]               | 62.20 | 2 | 6  | 6  | 40  | 0.95 | 0.73 | 0.79 | 0.76 | 0.85 | 0.46 | 0.49 | 0.43 | 0.47 | 0.48 | 0.50 | 0.43 | 0.47 | 18.60  | 7.96 |
| Q9CR39 | WD repeat domain phosphoinositide-interacting protein 3<br>OS=Mus musculus<br>GN=Wdr45b PE=2<br>SV=2 -<br>[WIPI3_MOUSE]      | 15.12 | 3 | 4  | 4  | 10  | 1.13 | 0.85 | 0.76 | 0.89 | 0.79 | 0.47 | 0.39 | 0.44 | 0.38 | 0.45 | 0.39 | 0.53 | 0.46 | 38.00  | 7.56 |

|         |                                                                                                                                          |       |   |   |   |    |      |      |      |      |      |      |      |      |      |       |       |      |      |        |      |
|---------|------------------------------------------------------------------------------------------------------------------------------------------|-------|---|---|---|----|------|------|------|------|------|------|------|------|------|-------|-------|------|------|--------|------|
| P35505  | Fumarylacetoacetase<br>OS=Mus musculus<br>GN=Fah PE=1 SV=2 -<br>[FAAA_MOUSE]                                                             | 27.92 | 2 | 8 | 8 | 22 | 1.13 | 0.87 | 0.79 | 0.79 | 0.73 | 0.40 | 0.34 | 0.44 | 0.39 | 0.43  | 0.40  | 0.46 | 0.40 | 46.15  | 7.18 |
| Q9CQT1  | Methylthioribose-1-<br>phosphate isomerase<br>OS=Mus musculus<br>GN=Mri1 PE=2 SV=1 -<br>[MTNA_MOUSE]                                     | 17.07 | 3 | 5 | 5 | 15 | 0.96 | 0.91 | 0.97 | 0.73 | 0.76 | 0.42 | 0.42 | 0.44 | 0.46 | 0.40  | 0.44  | 0.41 | 0.44 | 39.39  | 5.91 |
| O70472  | Transmembrane<br>protein 131 OS=Mus<br>musculus<br>GN=Tmem131 PE=1<br>SV=2 -<br>[TM131_MOUSE]                                            | 1.17  | 1 | 1 | 1 | 1  | 5.61 | 4.46 | 0.79 | 0.32 | 0.06 | 0.32 | 0.06 | 0.44 | 0.08 | 0.52  | 0.09  | 0.88 | 0.16 | 204.52 | 8.54 |
| Q640M6  | Glycerophosphodiester<br>phosphodiesterase<br>domain-containing<br>protein 5 OS=Mus<br>musculus GN=Gdpd5<br>PE=2 SV=1 -<br>[GDPD5_MOUSE] | 2.14  | 1 | 1 | 1 | 2  | 0.80 | 1.30 | 1.62 | 1.37 | 1.72 | 0.55 | 0.68 | 0.44 | 0.56 | 0.89  | 1.12  | 1.04 | 1.31 | 68.85  | 8.00 |
| Q61646  | Haptoglobin OS=Mus<br>musculus GN=Hp<br>PE=1 SV=1 -<br>[HPT_MOUSE]                                                                       | 3.75  | 1 | 1 | 1 | 1  | 1.73 | 1.81 | 1.04 | 1.36 | 0.79 | 1.06 | 0.61 | 0.45 | 0.26 | 18.79 | 10.90 | 8.46 | 4.91 | 38.73  | 6.29 |
| Q6T264  | Mastermind-like<br>protein 1 OS=Mus<br>musculus GN=Mam11<br>PE=1 SV=2 -<br>[MAML1_MOUSE]                                                 | 2.25  | 1 | 1 | 1 | 1  | 4.69 | 6.01 | 1.28 | 0.39 | 0.08 | 0.29 | 0.06 | 0.45 | 0.10 | 0.30  | 0.06  | 0.39 | 0.08 | 107.66 | 7.85 |
| O89106  | Bis(5'-adenosyl)-<br>triphosphatase<br>OS=Mus musculus<br>GN=Fhit PE=2 SV=3 -<br>[FHIT_MOUSE]                                            | 56.00 | 5 | 7 | 7 | 18 | 1.04 | 0.93 | 0.84 | 0.78 | 0.73 | 0.53 | 0.45 | 0.45 | 0.42 | 0.38  | 0.36  | 0.46 | 0.45 | 17.22  | 6.73 |
| Q571E4  | N-acetylgalactosamine-<br>6-sulfatase OS=Mus<br>musculus GN=Galns<br>PE=2 SV=2 -<br>[GALNS_MOUSE]                                        | 6.35  | 1 | 2 | 2 | 2  | 0.99 | 1.12 | 1.13 | 0.71 | 0.72 | 0.45 | 0.46 | 0.45 | 0.45 | 0.42  | 0.42  | 0.47 | 0.48 | 57.64  | 6.52 |
| Q8CFD4  | Sorting nexin-8<br>OS=Mus musculus<br>GN=Snx8 PE=2 SV=1 -<br>[SNX8_MOUSE]                                                                | 1.74  | 1 | 1 | 1 | 2  | 1.03 | 0.81 | 0.79 | 0.96 | 0.94 | 0.46 | 0.45 | 0.45 | 0.44 | 0.48  | 0.47  | 0.66 | 0.64 | 52.03  | 8.03 |
| Q6NT99  | Dual specificity protein<br>phosphatase 23<br>OS=Mus musculus<br>GN=Dusp23 PE=2<br>SV=1 -<br>[DUS23_MOUSE]                               | 19.33 | 1 | 3 | 3 | 5  | 1.11 | 1.05 | 0.97 | 0.94 | 0.81 | 0.45 | 0.40 | 0.45 | 0.43 | 0.46  | 0.44  | 0.68 | 0.61 | 16.63  | 8.21 |
| Q5RKZ7- | Isoform 3 of<br>Molybdenum cofactor<br>biosynthesis protein 1<br>OS=Mus musculus<br>GN=Mocs1 -<br>[MOCS1_MOUSE]                          | 3.21  | 2 | 1 | 1 | 1  | 1.05 | 0.66 | 0.63 | 0.79 | 0.75 | 0.54 | 0.51 | 0.46 | 0.43 | 0.49  | 0.46  | 0.62 | 0.59 | 26.61  | 8.75 |
| P58058  | NAD kinase OS=Mus<br>musculus GN=Nadk<br>PE=1 SV=2 -<br>[NADK_MOUSE]                                                                     | 4.78  | 4 | 2 | 2 | 4  | 0.87 | 1.19 | 1.37 | 0.95 | 1.09 | 0.46 | 0.52 | 0.46 | 0.53 | 0.44  | 0.51  | 0.49 | 0.57 | 48.57  | 6.52 |



|        |                                                                                                                  |       |   |    |    |    |      |      |      |      |      |      |      |      |      |      |      |      |      |       |      |
|--------|------------------------------------------------------------------------------------------------------------------|-------|---|----|----|----|------|------|------|------|------|------|------|------|------|------|------|------|------|-------|------|
| O70250 | Phosphoglycerate mutase 2 OS=Mus musculus GN=Pgam2 PE=1 SV=3 - [PGAM2_MOUSE]                                     | 36.36 | 1 | 3  | 9  | 85 | 1.18 | 0.77 | 0.65 | 0.81 | 0.66 | 0.51 | 0.43 | 0.47 | 0.39 | 0.55 | 0.46 | 0.45 | 0.39 | 28.81 | 8.50 |
| Q8QZR5 | Alanine aminotransferase 1 OS=Mus musculus GN=Gpt PE=2 SV=3 - [ALAT1_MOUSE]                                      | 35.28 | 1 | 12 | 12 | 24 | 1.09 | 0.90 | 0.86 | 0.80 | 0.75 | 0.44 | 0.40 | 0.47 | 0.46 | 0.39 | 0.42 | 0.48 | 0.43 | 55.11 | 6.64 |
| Q91X72 | Hemopexin OS=Mus musculus GN=Hpx PE=1 SV=2 - [HEMO_MOUSE]                                                        | 17.61 | 1 | 5  | 5  | 8  | 0.92 | 0.84 | 0.82 | 0.67 | 0.80 | 0.67 | 0.72 | 0.47 | 0.60 | 1.00 | 1.08 | 0.69 | 0.73 | 51.29 | 7.80 |
| Q99KN2 | Probable cytosolic iron-sulfur protein assembly protein CIAO1 OS=Mus musculus GN=Ciao1 PE=2 SV=1 - [CIAO1_MOUSE] | 27.14 | 3 | 6  | 6  | 10 | 0.94 | 0.98 | 1.04 | 0.87 | 0.89 | 0.47 | 0.53 | 0.47 | 0.54 | 0.48 | 0.56 | 0.53 | 0.58 | 37.61 | 4.88 |
| Q8R3P0 | Aspartoacylase OS=Mus musculus GN=Aspa PE=1 SV=2 - [ACY2_MOUSE]                                                  | 47.76 | 3 | 9  | 9  | 35 | 0.73 | 0.84 | 1.14 | 0.79 | 1.07 | 0.45 | 0.62 | 0.47 | 0.67 | 0.46 | 0.62 | 0.50 | 0.66 | 35.32 | 6.58 |
| Q61233 | Plastin-2 OS=Mus musculus GN=Lcp1 PE=1 SV=4 - [PLSL_MOUSE]                                                       | 36.68 | 5 | 14 | 18 | 46 | 1.07 | 0.97 | 0.94 | 0.97 | 0.88 | 0.47 | 0.46 | 0.48 | 0.47 | 0.50 | 0.51 | 0.50 | 0.50 | 70.10 | 5.33 |
| P51174 | Long-chain specific acyl-CoA dehydrogenase, mitochondrial OS=Mus musculus GN=Acadl PE=2 SV=2 - [ACADL_MOUSE]     | 42.56 | 1 | 17 | 17 | 58 | 0.98 | 0.83 | 0.89 | 0.90 | 0.92 | 0.48 | 0.50 | 0.48 | 0.51 | 0.50 | 0.49 | 0.54 | 0.55 | 47.88 | 8.31 |
| Q9Z1Z2 | Serine-threonine kinase receptor-associated protein OS=Mus musculus GN=Strap PE=1 SV=2 - [STRAP_MOUSE]           | 60.57 | 1 | 15 | 15 | 66 | 0.97 | 0.78 | 0.87 | 0.89 | 0.92 | 0.47 | 0.50 | 0.48 | 0.51 | 0.48 | 0.48 | 0.51 | 0.51 | 38.42 | 5.12 |
| Q3UWE6 | MCG14935, isoform CRA_a OS=Mus musculus GN=Wdr20a PE=2 SV=1 - [Q3UWE6_MOUSE]                                     | 16.17 | 2 | 8  | 8  | 19 | 0.99 | 1.01 | 0.95 | 0.89 | 0.89 | 0.47 | 0.48 | 0.48 | 0.45 | 0.45 | 0.44 | 0.53 | 0.50 | 62.85 | 8.00 |
| Q8VCN5 | Cystathionine gamma-lyase OS=Mus musculus GN=Cdh PE=1 SV=1 - [CGL_MOUSE]                                         | 10.05 | 1 | 3  | 3  | 7  | 0.90 | 1.04 | 1.14 | 0.93 | 1.02 | 0.45 | 0.47 | 0.48 | 0.49 | 0.52 | 0.54 | 0.55 | 0.56 | 43.54 | 7.65 |
| Q9Z2W0 | Aspartyl aminopeptidase OS=Mus musculus GN=Dnpep PE=2 SV=2 - [DNPEP_MOUSE]                                       | 49.68 | 1 | 16 | 16 | 77 | 1.09 | 0.83 | 0.75 | 0.86 | 0.78 | 0.47 | 0.42 | 0.48 | 0.44 | 0.50 | 0.44 | 0.53 | 0.49 | 52.17 | 7.25 |
| G3UYJ3 | Solute carrier family 25 member 51 (Fragment) OS=Mus musculus GN=Slc25a51 PE=2 SV=1 - [G3UYJ3_MOUSE]             | 4.59  | 4 | 1  | 1  | 3  | 0.88 | 0.96 | 1.09 | 1.01 | 1.15 | 0.59 | 0.67 | 0.48 | 0.55 | 0.60 | 0.68 | 0.73 | 0.83 | 22.16 | 9.44 |

|          |                                                                                                             |       |   |    |    |     |      |      |      |      |      |      |      |      |      |      |      |      |      |       |      |
|----------|-------------------------------------------------------------------------------------------------------------|-------|---|----|----|-----|------|------|------|------|------|------|------|------|------|------|------|------|------|-------|------|
| Q60571   | Corticotropin-releasing factor-binding protein OS=Mus musculus GN=Crbp PE=2 SV=1 - [CRHBP_MOUSE]            | 3.42  | 1 | 1  | 1  | 2   | 1.34 | 1.11 | 0.82 | 0.95 | 0.71 | 0.49 | 0.36 | 0.48 | 0.36 | 0.43 | 0.32 | 0.66 | 0.49 | 36.02 | 6.60 |
| P54729   | NEDD8 ultimate buster 1 OS=Mus musculus GN=Nub1 PE=1 SV=2 - [NUB1_MOUSE]                                    | 2.44  | 1 | 1  | 1  | 1   | 0.55 | 0.81 | 1.48 | 0.39 | 0.72 | 0.50 | 0.91 | 0.49 | 0.88 | 0.58 | 1.05 | 0.62 | 1.14 | 70.26 | 5.88 |
| Q8CF15   | Probable proline--tRNA ligase, mitochondrial OS=Mus musculus GN=Pars2 PE=2 SV=2 - [SYPM_MOUSE]              | 19.37 | 2 | 7  | 7  | 12  | 1.07 | 0.81 | 0.82 | 0.88 | 0.81 | 0.53 | 0.51 | 0.49 | 0.50 | 0.54 | 0.51 | 0.59 | 0.58 | 53.48 | 7.84 |
| Q64288   | Olfactory marker protein OS=Mus musculus GN=Omp PE=1 SV=3 - [OMP_MOUSE]                                     | 56.44 | 1 | 6  | 6  | 16  | 0.73 | 0.34 | 0.44 | 0.50 | 0.66 | 1.32 | 1.88 | 0.49 | 0.61 | 0.70 | 0.93 | 1.55 | 2.20 | 18.85 | 5.14 |
| P50428   | Arylsulfatase A OS=Mus musculus GN=Arsa PE=2 SV=2 - [ARSA_MOUSE]                                            | 18.38 | 2 | 6  | 6  | 19  | 1.03 | 0.79 | 0.77 | 0.88 | 0.83 | 0.46 | 0.44 | 0.49 | 0.50 | 0.49 | 0.46 | 0.58 | 0.55 | 53.71 | 5.87 |
| Q9CPU0   | Lactylglutathione lyase OS=Mus musculus GN=Glo1 PE=1 SV=3 - [LGUL_MOUSE]                                    | 47.28 | 1 | 9  | 9  | 45  | 0.98 | 0.71 | 0.75 | 0.85 | 0.81 | 0.47 | 0.50 | 0.49 | 0.50 | 0.50 | 0.48 | 0.51 | 0.51 | 20.80 | 5.47 |
| Q9R1P3   | Proteasome subunit beta type-2 OS=Mus musculus GN=Psb2 PE=1 SV=1 - [PSB2_MOUSE]                             | 50.75 | 1 | 7  | 7  | 16  | 0.94 | 1.29 | 1.26 | 1.02 | 1.11 | 0.57 | 0.63 | 0.50 | 0.52 | 0.57 | 0.58 | 0.70 | 0.77 | 22.89 | 7.02 |
| Q9QXP7   | Complement C1q tumor necrosis factor-related protein 1 OS=Mus musculus GN=C1qtnf1 PE=2 SV=1 - [C1QTI_MOUSE] | 2.85  | 1 | 1  | 1  | 1   | 1.25 | 1.16 | 0.93 | 0.92 | 0.73 | 0.53 | 0.42 | 0.50 | 0.40 | 0.50 | 0.40 | 0.52 | 0.42 | 31.99 | 5.87 |
| Q80TL4-2 | Isoform 2 of Protein KIAA1045 OS=Mus musculus GN=Kiaa1045 - [K1045_MOUSE]                                   | 38.84 | 3 | 1  | 13 | 86  | 0.60 | 0.80 | 1.33 | 0.49 | 0.81 | 0.58 | 0.96 | 0.50 | 0.83 | 0.48 | 0.80 | 0.61 | 1.03 | 41.30 | 5.45 |
| Q3V1L4   | Cytosolic purine 5'-nucleotidase OS=Mus musculus GN=Nt5c2 PE=1 SV=2 - [SNTC_MOUSE]                          | 6.07  | 3 | 3  | 3  | 7   | 1.01 | 0.87 | 0.85 | 0.85 | 0.88 | 0.51 | 0.52 | 0.50 | 0.44 | 0.51 | 0.53 | 0.58 | 0.55 | 64.77 | 6.21 |
| Q8VEB6   | Zinc phosphodiesterase ELAC protein 1 OS=Mus musculus GN=Elac1 PE=2 SV=1 - [RNZ1_MOUSE]                     | 20.44 | 2 | 5  | 5  | 10  | 1.14 | 1.04 | 0.84 | 0.93 | 0.80 | 0.53 | 0.49 | 0.50 | 0.40 | 0.55 | 0.47 | 0.65 | 0.56 | 39.71 | 6.60 |
| P40142   | Transketolase OS=Mus musculus GN=Tkt PE=1 SV=1 - [TKT_MOUSE]                                                | 66.13 | 2 | 37 | 37 | 334 | 1.03 | 0.80 | 0.77 | 0.83 | 0.81 | 0.47 | 0.46 | 0.50 | 0.48 | 0.50 | 0.48 | 0.54 | 0.49 | 67.59 | 7.50 |
| Q3U6C5   | Voltage-gated potassium channel subunit beta-1 OS=Mus musculus GN=Kcnab1 PE=2 SV=1 - [Q3U6C5_MOUSE]         | 31.19 | 5 | 3  | 6  | 8   | 1.02 | 0.98 | 0.95 | 0.85 | 0.84 | 0.57 | 0.58 | 0.51 | 0.52 | 0.78 | 0.81 | 0.59 | 0.61 | 33.18 | 8.79 |

|        |                                                                                                 |       |   |    |    |     |      |      |      |      |      |      |      |      |      |      |      |      |      |       |      |
|--------|-------------------------------------------------------------------------------------------------|-------|---|----|----|-----|------|------|------|------|------|------|------|------|------|------|------|------|------|-------|------|
| P01872 | Ig mu chain C region secreted form OS=Mus musculus GN=Igh-6 PE=1 SV=2 - [IGHM_MOUSE]            | 6.39  | 2 | 2  | 2  | 5   | 0.74 | 0.93 | 1.26 | 0.46 | 0.66 | 0.75 | 1.07 | 0.51 | 0.66 | 1.20 | 1.53 | 0.68 | 0.97 | 49.94 | 7.01 |
| Q8BM88 | Cathepsin O OS=Mus musculus GN=Ctso PE=2 SV=1 - [CATO_MOUSE]                                    | 3.21  | 1 | 1  | 1  | 2   | 1.02 | 1.35 | 1.33 | 0.79 | 0.78 | 0.47 | 0.46 | 0.51 | 0.50 | 0.45 | 0.45 | 0.46 | 0.46 | 34.70 | 7.80 |
| P47857 | 6-phosphofructokinase, muscle type OS=Mus musculus GN=Pfkfb1 PE=1 SV=3 - [K6PF_MOUSE]           | 55.90 | 2 | 34 | 39 | 367 | 1.03 | 0.91 | 0.88 | 0.95 | 0.92 | 0.53 | 0.51 | 0.51 | 0.49 | 0.53 | 0.52 | 0.56 | 0.54 | 85.21 | 8.00 |
| E9PYT3 | Atlastin-3 OS=Mus musculus GN=Atf3 PE=2 SV=1 - [E9PYT3_MOUSE]                                   | 3.92  | 2 | 1  | 1  | 2   | 0.59 | 0.41 | 0.69 | 0.56 | 0.96 | 0.53 | 0.90 | 0.51 | 0.87 | 0.51 | 0.87 | 0.49 | 0.84 | 60.19 | 5.81 |
| Q9JMH6 | Isoform 2 of Thioredoxin reductase 1, cytoplasmic OS=Mus musculus GN=Txnrd1 - [TRXR1_MOUSE]     | 43.49 | 2 | 13 | 14 | 29  | 1.13 | 0.95 | 0.80 | 0.92 | 0.82 | 0.45 | 0.41 | 0.51 | 0.48 | 0.50 | 0.48 | 0.57 | 0.54 | 54.51 | 6.33 |
| P24547 | Inosine-5'-monophosphate dehydrogenase 2 OS=Mus musculus GN=Impdh2 PE=1 SV=2 - [IMDH2_MOUSE]    | 24.51 | 1 | 12 | 13 | 32  | 1.10 | 0.99 | 0.89 | 1.04 | 0.93 | 0.57 | 0.51 | 0.51 | 0.48 | 0.59 | 0.52 | 0.62 | 0.54 | 55.78 | 7.28 |
| Q9DCF9 | Isoform 2 of Translocon-associated protein subunit gamma OS=Mus musculus GN=Ssr3 - [SSRG_MOUSE] | 7.82  | 2 | 1  | 1  | 1   | 0.82 | 1.07 | 1.31 | 1.05 | 1.28 | 0.47 | 0.57 | 0.51 | 0.63 | 0.57 | 0.70 | 0.61 | 0.74 | 20.69 | 9.35 |
| Q923A2 | Protein Spindly OS=Mus musculus GN=Spdl1 PE=1 SV=2 - [SPDLY_MOUSE]                              | 1.81  | 1 | 1  | 1  | 1   | 0.90 | 1.11 | 1.23 | 0.26 | 0.29 | 0.75 | 0.84 | 0.51 | 0.57 | 0.79 | 0.88 | 0.52 | 0.58 | 70.19 | 6.00 |
| Q8C605 | 6-phosphofructokinase OS=Mus musculus GN=Pfkfb1 PE=2 SV=1 - [Q8C605_MOUSE]                      | 55.23 | 5 | 36 | 40 | 275 | 1.01 | 0.92 | 0.93 | 0.95 | 0.94 | 0.53 | 0.53 | 0.52 | 0.53 | 0.53 | 0.53 | 0.57 | 0.56 | 85.49 | 6.89 |
| Q8BTY1 | Kynurenine--oxoglutarate transaminase 1 OS=Mus musculus GN=Cbl1 PE=2 SV=1 - [KAT1_MOUSE]        | 19.34 | 3 | 8  | 8  | 19  | 1.12 | 0.85 | 0.76 | 0.79 | 0.70 | 0.52 | 0.43 | 0.52 | 0.46 | 0.56 | 0.48 | 0.62 | 0.52 | 47.53 | 6.95 |
| Q924B0 | Inositol (Myo)-1(Or 4)-monophosphatase 1 OS=Mus musculus GN=Impa1 PE=2 SV=1 - [Q924B0_MOUSE]    | 53.79 | 4 | 14 | 14 | 83  | 1.21 | 0.89 | 0.75 | 1.00 | 0.81 | 0.49 | 0.40 | 0.52 | 0.41 | 0.57 | 0.50 | 0.64 | 0.49 | 30.41 | 5.19 |
| Q9CPY7 | Isoform 2 of Cytosol aminopeptidase OS=Mus musculus GN=Lap3 - [AMPL_MOUSE]                      | 73.98 | 2 | 29 | 29 | 188 | 1.11 | 0.87 | 0.82 | 0.85 | 0.78 | 0.54 | 0.51 | 0.52 | 0.51 | 0.57 | 0.54 | 0.57 | 0.54 | 52.72 | 7.03 |

|        |                                                                                                          |       |   |    |    |    |      |      |      |      |      |      |      |      |      |      |      |      |      |        |      |
|--------|----------------------------------------------------------------------------------------------------------|-------|---|----|----|----|------|------|------|------|------|------|------|------|------|------|------|------|------|--------|------|
| Q8BWT1 | 3-ketoacyl-CoA thiolase, mitochondrial OS=Mus musculus GN=Acaa2 PE=1 SV=3 - [THIM_MOUSE]                 | 60.20 | 1 | 17 | 17 | 42 | 1.11 | 0.91 | 0.83 | 0.89 | 0.82 | 0.59 | 0.48 | 0.53 | 0.50 | 0.59 | 0.51 | 0.63 | 0.58 | 41.80  | 8.09 |
| Q9CX80 | Cytoglobin OS=Mus musculus GN=Cygb PE=2 SV=1 - [CYGB_MOUSE]                                              | 16.32 | 1 | 3  | 3  | 11 | 1.22 | 0.82 | 0.79 | 0.95 | 0.73 | 0.55 | 0.41 | 0.53 | 0.43 | 0.59 | 0.49 | 0.59 | 0.50 | 21.45  | 6.80 |
| Q8CD16 | Coiled-coil domain-containing protein 158 OS=Mus musculus GN=Ccdc158 PE=2 SV=1 - [CD158_MOUSE]           | 2.34  | 2 | 2  | 3  | 3  | 2.62 | 2.58 | 0.98 | 0.76 | 0.29 | 0.55 | 0.21 | 0.53 | 0.20 | 0.54 | 0.21 | 0.69 | 0.26 | 126.75 | 6.40 |
| Q8CBC8 | Branched-chain-amino acid aminotransferase OS=Mus musculus GN=Beat1 PE=2 SV=1 - [Q8CBC8_MOUSE]           | 28.70 | 7 | 10 | 10 | 38 | 1.03 | 0.94 | 0.88 | 0.85 | 0.84 | 0.52 | 0.51 | 0.53 | 0.52 | 0.52 | 0.55 | 0.58 | 0.54 | 49.87  | 6.77 |
| O88958 | Glucosamine-6-phosphate isomerase 1 OS=Mus musculus GN=Gnpda1 PE=2 SV=3 - [GNP1_MOUSE]                   | 47.06 | 2 | 8  | 10 | 24 | 1.11 | 0.80 | 0.87 | 0.88 | 0.83 | 0.64 | 0.63 | 0.53 | 0.67 | 0.60 | 0.70 | 0.55 | 0.70 | 32.53  | 6.60 |
| Q8BHA3 | Probable D-tyrosyl-tRNA(Tyr) deacylase 2 OS=Mus musculus GN=Dtd2 PE=2 SV=1 - [DTD2_MOUSE]                | 32.14 | 2 | 4  | 4  | 8  | 1.13 | 0.78 | 0.65 | 0.75 | 0.67 | 0.57 | 0.45 | 0.53 | 0.43 | 0.41 | 0.38 | 0.60 | 0.56 | 18.22  | 7.91 |
| E0CX20 | Protein BUD31 homolog OS=Mus musculus GN=Bud31 PE=4 SV=1 - [E0CX20_MOUSE]                                | 20.83 | 2 | 2  | 2  | 19 | 0.85 | 0.64 | 0.77 | 0.83 | 1.02 | 0.51 | 0.60 | 0.54 | 0.64 | 0.46 | 0.56 | 0.48 | 0.60 | 16.99  | 8.82 |
| Q9WV54 | Acid ceramidase OS=Mus musculus GN=Asah1 PE=1 SV=1 - [ASAH1_MOUSE]                                       | 35.79 | 3 | 12 | 12 | 25 | 1.00 | 0.87 | 0.91 | 0.88 | 0.89 | 0.46 | 0.50 | 0.54 | 0.49 | 0.53 | 0.56 | 0.57 | 0.57 | 44.64  | 8.46 |
| Q8BG93 | Probable 8-oxo-dGTP diphosphatase NUDT15 OS=Mus musculus GN=Nudt15 PE=1 SV=1 - [NUDT15_MOUSE]            | 6.47  | 1 | 1  | 1  | 2  | 0.58 | 0.48 | 0.83 | 0.49 | 0.85 | 0.62 | 1.08 | 0.54 | 0.93 | 0.45 | 0.77 | 0.47 | 0.83 | 19.56  | 5.27 |
| Q8R0N6 | Isoform 2 of Hydroxyacid-oxoacid transhydrogenase, mitochondrial OS=Mus musculus GN=Adhfe1 - [HOT_MOUSE] | 16.71 | 2 | 5  | 5  | 10 | 1.02 | 0.79 | 0.84 | 0.88 | 0.83 | 0.55 | 0.55 | 0.54 | 0.52 | 0.44 | 0.44 | 0.52 | 0.52 | 44.99  | 7.12 |
| Q8BTR5 | Dual specificity phosphatase 28 OS=Mus musculus GN=Dusp28 PE=1 SV=1 - [DUS28_MOUSE]                      | 6.75  | 1 | 1  | 1  | 2  | 0.98 | 1.08 | 1.10 | 1.01 | 1.03 | 0.56 | 0.57 | 0.54 | 0.55 | 0.53 | 0.54 | 0.52 | 0.53 | 17.49  | 7.75 |
| Q9J146 | Diphosphoinositol polyphosphate phosphohydrolase 1 OS=Mus musculus GN=Nudt3 PE=1 SV=1 - [NUDT3_MOUSE]    | 65.48 | 5 | 7  | 8  | 46 | 0.86 | 0.85 | 0.92 | 0.84 | 0.96 | 0.55 | 0.60 | 0.54 | 0.64 | 0.54 | 0.61 | 0.55 | 0.61 | 19.02  | 6.34 |

|        |                                                                                             |       |   |    |    |     |      |      |      |      |      |      |      |      |      |      |      |      |      |       |      |
|--------|---------------------------------------------------------------------------------------------|-------|---|----|----|-----|------|------|------|------|------|------|------|------|------|------|------|------|------|-------|------|
| Q8CC86 | Nicotinate phosphoribosyltransferase OS=Mus musculus GN=Naprt1 PE=2 SV=1 - [PNCB_MOUSE]     | 7.81  | 1 | 2  | 2  | 4   | 0.88 | 0.93 | 1.06 | 0.71 | 0.80 | 0.53 | 0.60 | 0.54 | 0.61 | 0.64 | 0.73 | 0.54 | 0.62 | 58.23 | 6.46 |
| Q99KW9 | T-cell immunomodulatory protein OS=Mus musculus GN=Itfg1 PE=2 SV=2 - [TIP_MOUSE]            | 2.30  | 1 | 1  | 1  | 1   | 1.07 | 0.69 | 0.65 | 0.78 | 0.73 | 0.96 | 0.89 | 0.54 | 0.50 | 0.96 | 0.90 | 1.32 | 1.23 | 67.42 | 5.73 |
| O08807 | Peroxisredoxin-4 OS=Mus musculus GN=Prdx4 PE=1 SV=1 - [PRDX4_MOUSE]                         | 27.37 | 2 | 4  | 6  | 41  | 1.05 | 0.73 | 0.72 | 0.90 | 0.86 | 0.53 | 0.50 | 0.54 | 0.54 | 0.52 | 0.52 | 0.54 | 0.54 | 31.03 | 7.15 |
| Q9R111 | Guanine deaminase OS=Mus musculus GN=Gda PE=1 SV=1 - [GUAD_MOUSE]                           | 57.05 | 2 | 21 | 22 | 201 | 1.02 | 0.97 | 0.91 | 0.89 | 0.85 | 0.56 | 0.53 | 0.55 | 0.53 | 0.54 | 0.52 | 0.62 | 0.55 | 50.98 | 5.53 |
| Q99K85 | Phosphoserine aminotransferase OS=Mus musculus GN=Psat1 PE=1 SV=1 - [SERC_MOUSE]            | 50.00 | 3 | 16 | 16 | 89  | 0.97 | 0.82 | 0.85 | 0.94 | 0.95 | 0.57 | 0.57 | 0.55 | 0.56 | 0.59 | 0.60 | 0.61 | 0.62 | 40.45 | 8.03 |
| A3KMP2 | Isoform 2 of Tetratricopeptide repeat protein 38 OS=Mus musculus GN=Ttc38 - [TTC38_MOUSE]   | 10.39 | 2 | 2  | 2  | 6   | 0.99 | 1.14 | 1.15 | 0.81 | 0.82 | 0.60 | 0.60 | 0.55 | 0.55 | 0.62 | 0.63 | 0.71 | 0.72 | 31.57 | 6.29 |
| P26043 | Radixin OS=Mus musculus GN=Rdx PE=1 SV=3 - [RAD1_MOUSE]                                     | 46.14 | 2 | 17 | 29 | 65  | 0.82 | 0.70 | 0.92 | 0.85 | 1.00 | 0.53 | 0.67 | 0.55 | 0.62 | 0.49 | 0.60 | 0.53 | 0.70 | 68.50 | 6.20 |
| P42125 | Enoyl-CoA delta isomerase 1, mitochondrial OS=Mus musculus GN=Eci1 PE=2 SV=2 - [ECT1_MOUSE] | 31.83 | 1 | 8  | 8  | 34  | 1.12 | 0.90 | 0.75 | 0.96 | 0.84 | 0.56 | 0.43 | 0.55 | 0.44 | 0.56 | 0.47 | 0.58 | 0.45 | 32.23 | 8.98 |
| Q8JZR2 | Adapter molecule crk OS=Mus musculus GN=Crk PE=2 SV=1 - [Q8JZR2_MOUSE]                      | 80.88 | 5 | 1  | 14 | 140 | 0.91 | 0.82 | 0.92 | 0.76 | 0.94 | 0.50 | 0.53 | 0.55 | 0.58 | 0.50 | 0.53 | 0.55 | 0.61 | 22.88 | 5.48 |
| Q9CWQ0 | Diphthine synthase OS=Mus musculus GN=Dph5 PE=2 SV=2 - [DPH5_MOUSE]                         | 25.62 | 2 | 5  | 5  | 11  | 1.30 | 1.12 | 0.81 | 0.94 | 0.65 | 0.53 | 0.35 | 0.55 | 0.36 | 0.57 | 0.38 | 0.67 | 0.45 | 31.20 | 5.29 |
| Q8CAY6 | Acetyl-CoA acetyltransferase, cytosolic OS=Mus musculus GN=Acat2 PE=1 SV=2 - [THIC_MOUSE]   | 49.12 | 2 | 4  | 10 | 44  | 1.02 | 0.72 | 0.67 | 0.82 | 0.82 | 0.70 | 0.50 | 0.55 | 0.47 | 0.59 | 0.46 | 0.59 | 0.47 | 41.27 | 7.50 |
| P01878 | Ig alpha chain C region OS=Mus musculus PE=1 SV=1 - [IGHA_MOUSE]                            | 6.69  | 1 | 2  | 2  | 3   | 1.21 | 0.68 | 0.48 | 0.68 | 0.56 | 0.50 | 0.36 | 0.55 | 0.43 | 0.72 | 0.51 | 0.49 | 0.38 | 36.85 | 5.06 |
| Q9D0M5 | Dynein light chain 2, cytoplasmic OS=Mus musculus GN=Dynl2 PE=1 SV=1 - [DYL2_MOUSE]         | 74.16 | 2 | 5  | 9  | 130 | 0.92 | 0.81 | 0.85 | 0.86 | 0.92 | 0.59 | 0.64 | 0.56 | 0.67 | 0.54 | 0.60 | 0.46 | 0.62 | 10.34 | 7.37 |

|        |                                                                                                                   |       |   |    |    |     |      |      |      |      |      |      |      |      |      |      |      |      |      |        |      |
|--------|-------------------------------------------------------------------------------------------------------------------|-------|---|----|----|-----|------|------|------|------|------|------|------|------|------|------|------|------|------|--------|------|
| Q80X81 | Acetyl-Coenzyme A acetyltransferase 3<br>OS=Mus musculus<br>GN=Acat3 PE=2<br>SV=1 -<br>[Q80X81_MOUSE]             | 37.28 | 2 | 2  | 9  | 29  | 1.19 | 1.02 | 0.85 | 0.81 | 0.69 | 0.51 | 0.58 | 0.56 | 0.49 | 0.49 | 0.50 | 0.56 | 0.46 | 41.44  | 7.94 |
| Q69ZF7 | Metal transporter<br>CNNM4 OS=Mus musculus<br>GN=Cnm4 PE=1 SV=2 -<br>[CNNM4_MOUSE]                                | 1.69  | 1 | 1  | 1  | 1   | 0.92 | 0.89 | 0.97 | 0.72 | 0.78 | 0.84 | 0.90 | 0.56 | 0.60 | 0.72 | 0.78 | 0.72 | 0.79 | 86.57  | 6.07 |
| P50247 | Adenosylhomocysteine OS=Mus musculus<br>GN=Ahcy PE=1 SV=3<br>[SAHH_MOUSE]                                         | 44.68 | 2 | 16 | 18 | 59  | 0.93 | 0.86 | 1.02 | 0.98 | 1.06 | 0.60 | 0.70 | 0.56 | 0.60 | 0.61 | 0.66 | 0.60 | 0.66 | 47.66  | 6.54 |
| P63084 | Protein S100-A5 OS=Mus musculus<br>GN=S100a5 PE=2<br>SV=1 -<br>[S10A5_MOUSE]                                      | 19.35 | 1 | 2  | 2  | 3   | 0.74 | 0.69 | 0.93 | 0.67 | 0.82 | 2.11 | 2.77 | 0.56 | 0.75 | 0.88 | 1.18 | 1.90 | 2.44 | 10.81  | 5.26 |
| Q64010 | Adapter molecule crk OS=Mus musculus<br>GN=Crk PE=1 SV=1 -<br>[CRK_MOUSE]                                         | 60.20 | 5 | 3  | 16 | 139 | 0.83 | 0.80 | 0.90 | 0.85 | 1.02 | 0.54 | 0.58 | 0.56 | 0.67 | 0.47 | 0.56 | 0.68 | 0.77 | 33.79  | 5.55 |
| O88325 | Alpha-N-acetylglucosaminidase OS=Mus musculus<br>GN=Naglu PE=2<br>SV=1 -<br>[O88325_MOUSE]                        | 1.49  | 1 | 1  | 1  | 2   | 0.93 | 0.81 | 0.87 | 0.84 | 0.90 | 0.60 | 0.64 | 0.56 | 0.60 | 0.58 | 0.63 | 0.53 | 0.57 | 82.54  | 6.61 |
| Q8BHS3 | Pre-mRNA-splicing factor RBM22 OS=Mus musculus<br>GN=Rbm22 PE=2<br>SV=1 -<br>[RBM22_MOUSE]                        | 11.43 | 1 | 4  | 4  | 12  | 0.85 | 0.78 | 0.81 | 0.84 | 0.99 | 0.56 | 0.62 | 0.56 | 0.62 | 0.60 | 0.70 | 0.51 | 0.59 | 46.87  | 8.54 |
| O09159 | Lysosomal alpha-mannosidase OS=Mus musculus<br>GN=Man2b1 PE=2 SV=4 -<br>[MA2B1_MOUSE]                             | 3.26  | 1 | 3  | 3  | 4   | 0.94 | 0.98 | 1.05 | 0.81 | 0.86 | 0.67 | 0.71 | 0.56 | 0.61 | 0.61 | 0.66 | 0.65 | 0.69 | 114.58 | 8.13 |
| O35459 | Delta(3,5)-Delta(2,4)-dienoyl-CoA isomerase, mitochondrial OS=Mus musculus<br>GN=Ech1 PE=2 SV=1 -<br>[ECH1_MOUSE] | 51.07 | 2 | 12 | 12 | 29  | 1.10 | 0.94 | 0.82 | 0.80 | 0.74 | 0.41 | 0.41 | 0.56 | 0.53 | 0.68 | 0.61 | 0.70 | 0.67 | 36.10  | 7.71 |
| Q8CJG0 | Protein argonaute-2 OS=Mus musculus<br>GN=Ago2 PE=1 SV=3<br>- [AGO2_MOUSE]                                        | 17.67 | 2 | 8  | 12 | 24  | 0.90 | 1.03 | 1.09 | 0.94 | 1.07 | 0.60 | 0.65 | 0.57 | 0.62 | 0.56 | 0.69 | 0.62 | 0.74 | 97.24  | 9.19 |
| Q9D614 | Syntaxin 17, isoform CRA_b OS=Mus musculus<br>GN=Stx17 PE=2 SV=1 -<br>[Q9D614_MOUSE]                              | 23.55 | 2 | 1  | 4  | 5   | 0.75 | 0.64 | 0.84 | 0.44 | 0.59 | 0.53 | 0.70 | 0.57 | 0.75 | 0.55 | 0.73 | 0.35 | 0.46 | 31.49  | 6.47 |
| Q99KR3 | Beta-lactamase-like protein 2 OS=Mus musculus<br>GN=Lactb2 PE=1 SV=1 -<br>[LACB2_MOUSE]                           | 29.51 | 1 | 7  | 7  | 22  | 1.07 | 0.97 | 0.83 | 0.87 | 0.78 | 0.53 | 0.49 | 0.57 | 0.50 | 0.58 | 0.50 | 0.73 | 0.56 | 32.73  | 6.33 |

|          |                                                                                                                    |       |   |    |    |     |      |      |      |      |      |      |      |      |      |      |      |      |      |        |      |
|----------|--------------------------------------------------------------------------------------------------------------------|-------|---|----|----|-----|------|------|------|------|------|------|------|------|------|------|------|------|------|--------|------|
| Q55234   | Proteasome subunit beta type-5 OS=Mus musculus GN=Psmb5 PE=1 SV=3 - [PSB5_MOUSE]                                   | 33.71 | 1 | 9  | 9  | 28  | 0.88 | 1.05 | 1.20 | 1.05 | 1.18 | 0.62 | 0.73 | 0.57 | 0.68 | 0.60 | 0.70 | 0.71 | 0.81 | 28.51  | 7.02 |
| Q9CQQ7   | ATP synthase subunit b, mitochondrial OS=Mus musculus GN=Atp5f1 PE=1 SV=1 - [AT5F1_MOUSE]                          | 16.41 | 1 | 5  | 5  | 21  | 0.96 | 1.04 | 1.07 | 1.13 | 1.20 | 0.61 | 0.63 | 0.57 | 0.61 | 0.68 | 0.72 | 0.73 | 0.73 | 28.93  | 9.06 |
| Q9Z2Y8   | Proline synthase co-transcribed bacterial homolog protein OS=Mus musculus GN=Prosc PE=1 SV=1 - [PROSC_MOUSE]       | 35.04 | 1 | 4  | 8  | 35  | 0.90 | 0.86 | 0.95 | 0.85 | 0.94 | 0.57 | 0.63 | 0.57 | 0.67 | 0.54 | 0.60 | 0.63 | 0.67 | 30.03  | 8.27 |
| P21956-2 | Isoform 2 of Lactadherin OS=Mus musculus GN=Mfge8 - [MFGM_MOUSE]                                                   | 2.35  | 2 | 1  | 1  | 4   | 1.16 | 0.88 | 0.76 | 1.06 | 0.92 | 0.55 | 0.47 | 0.57 | 0.49 | 0.57 | 0.49 | 0.64 | 0.56 | 47.14  | 7.05 |
| Q00519   | Xanthine dehydrogenase/oxidase OS=Mus musculus GN=Xdh PE=1 SV=5 - [XDH_MOUSE]                                      | 5.62  | 1 | 6  | 6  | 10  | 0.93 | 0.97 | 0.88 | 0.83 | 0.90 | 0.70 | 0.55 | 0.57 | 0.64 | 0.55 | 0.65 | 0.55 | 0.60 | 146.47 | 7.56 |
| Q91VR7   | Microtubule-associated proteins 1A/1B light chain 3A OS=Mus musculus GN=Map1lc3a PE=1 SV=1 - [MLP3A_MOUSE]         | 19.83 | 2 | 2  | 3  | 18  | 0.87 | 0.52 | 0.56 | 0.81 | 0.94 | 0.54 | 0.63 | 0.57 | 0.66 | 0.50 | 0.58 | 0.54 | 0.65 | 14.26  | 8.68 |
| P62141   | Serine/threonine-protein phosphatase PP1-beta catalytic subunit OS=Mus musculus GN=Ppp1cb PE=1 SV=3 - [PP1B_MOUSE] | 71.87 | 1 | 7  | 20 | 127 | 0.98 | 0.91 | 0.87 | 0.89 | 0.91 | 0.52 | 0.54 | 0.57 | 0.60 | 0.56 | 0.54 | 0.59 | 0.64 | 37.16  | 6.19 |
| P97470   | Serine/threonine-protein phosphatase 4 catalytic subunit OS=Mus musculus GN=Ppp4c PE=1 SV=2 - [PP4C_MOUSE]         | 28.01 | 1 | 4  | 5  | 13  | 1.09 | 1.00 | 0.94 | 1.03 | 0.93 | 0.62 | 0.53 | 0.57 | 0.55 | 0.60 | 0.55 | 0.62 | 0.58 | 35.06  | 5.06 |
| Q9D240   | Pleckstrin homology domain-containing family J member 1 OS=Mus musculus GN=Plekj1 PE=2 SV=1 - [PKHJ1_MOUSE]        | 9.15  | 1 | 1  | 1  | 1   | 1.06 | 0.80 | 0.75 | 0.80 | 0.75 | 0.53 | 0.50 | 0.57 | 0.54 | 0.55 | 0.52 | 0.55 | 0.52 | 19.02  | 7.03 |
| Q8BWR2   | PITH domain-containing protein 1 OS=Mus musculus GN=Pithd1 PE=2 SV=1 - [PITH1_MOUSE]                               | 69.19 | 4 | 14 | 14 | 57  | 1.13 | 0.87 | 0.74 | 0.85 | 0.72 | 0.49 | 0.41 | 0.57 | 0.43 | 0.55 | 0.46 | 0.67 | 0.53 | 24.18  | 5.74 |
| Q9DBJ1   | Phosphoglycerate mutase 1 OS=Mus musculus GN=Pgam1 PE=1 SV=3 - [PGAM1_MOUSE]                                       | 86.22 | 1 | 16 | 21 | 479 | 0.93 | 0.83 | 0.90 | 0.86 | 0.94 | 0.58 | 0.63 | 0.57 | 0.62 | 0.58 | 0.63 | 0.56 | 0.62 | 28.81  | 7.18 |

|          |                                                                                                                              |       |   |    |    |     |      |      |      |      |      |      |      |      |      |      |      |      |      |       |      |
|----------|------------------------------------------------------------------------------------------------------------------------------|-------|---|----|----|-----|------|------|------|------|------|------|------|------|------|------|------|------|------|-------|------|
| P60487   | Pyridoxal phosphate phosphatase OS=Mus musculus GN=Pdxp PE=1 SV=1 - [PLPP_MOUSE]                                             | 77.05 | 1 | 18 | 18 | 131 | 1.09 | 0.98 | 0.86 | 0.91 | 0.84 | 0.54 | 0.49 | 0.57 | 0.52 | 0.59 | 0.55 | 0.63 | 0.61 | 31.49 | 5.74 |
| P03921   | NADH-ubiquinone oxidoreductase chain 5 OS=Mus musculus GN=Mtnd5 PE=3 SV=2 - [NUM_MOUSE]                                      | 2.14  | 2 | 1  | 1  | 2   | 1.13 | 1.28 | 1.13 | 1.29 | 1.14 | 0.49 | 0.43 | 0.57 | 0.51 | 0.74 | 0.66 | 0.90 | 0.80 | 68.39 | 9.03 |
| F6XMH5   | E3 ubiquitin-protein ligase TRIM37 (Fragment) OS=Mus musculus GN=Trim37 PE=4 SV=1 - [F6XMH5_MOUSE]                           | 5.90  | 2 | 1  | 1  | 1   | 1.63 | 0.88 | 0.54 | 0.81 | 0.50 | 1.10 | 0.67 | 0.58 | 0.35 | 0.92 | 0.56 | 0.88 | 0.54 | 36.60 | 5.01 |
| P83877   | Thioredoxin-like protein 4A OS=Mus musculus GN=Txnl4a PE=2 SV=1 - [TXN4A_MOUSE]                                              | 33.10 | 2 | 4  | 4  | 8   | 1.14 | 0.73 | 0.63 | 0.86 | 0.75 | 0.76 | 0.61 | 0.58 | 0.45 | 0.61 | 0.51 | 0.75 | 0.68 | 16.78 | 5.85 |
| P63087-2 | Isoform Gamma-2 of Serine/threonine-protein phosphatase PP1-gamma catalytic subunit OS=Mus musculus GN=Ppp1cc - [PP1G_MOUSE] | 74.48 | 2 | 6  | 21 | 118 | 0.97 | 0.94 | 0.98 | 0.90 | 0.96 | 0.49 | 0.56 | 0.58 | 0.63 | 0.54 | 0.61 | 0.64 | 0.68 | 38.48 | 6.13 |
| Q99LL5   | Periodic tryptophan protein 1 homolog OS=Mus musculus GN=Pwp1 PE=1 SV=1 - [PWP1_MOUSE]                                       | 4.59  | 1 | 1  | 1  | 2   | 1.10 | 0.96 | 0.87 | 0.91 | 0.83 | 0.52 | 0.47 | 0.58 | 0.53 | 0.44 | 0.40 | 0.53 | 0.48 | 55.55 | 4.82 |
| Q80TB8   | Synaptic vesicle membrane protein VAT-1 homolog-like OS=Mus musculus GN=Vat1l PE=2 SV=2 - [VAT1L_MOUSE]                      | 47.24 | 2 | 17 | 17 | 43  | 1.35 | 1.12 | 0.87 | 0.99 | 0.77 | 0.71 | 0.53 | 0.58 | 0.41 | 0.81 | 0.61 | 0.91 | 0.68 | 45.79 | 5.06 |
| Q8BFQ8   | Parkinson disease 7 domain-containing protein 1 OS=Mus musculus GN=Pddc1 PE=1 SV=1 - [PDDC1_MOUSE]                           | 50.45 | 1 | 7  | 7  | 14  | 1.12 | 0.98 | 1.02 | 1.08 | 1.00 | 0.62 | 0.58 | 0.59 | 0.59 | 0.63 | 0.58 | 0.64 | 0.71 | 23.26 | 7.05 |
| Q9DAR7   | m7GpppX diphosphatase OS=Mus musculus GN=Dcps PE=1 SV=1 - [DCPS_MOUSE]                                                       | 31.07 | 3 | 7  | 7  | 13  | 0.89 | 0.90 | 1.03 | 0.81 | 1.07 | 0.62 | 0.70 | 0.59 | 0.69 | 0.55 | 0.70 | 0.53 | 0.62 | 38.96 | 6.48 |
| Q68EF9   | Scube1 protein OS=Mus musculus GN=Scube1 PE=2 SV=1 - [Q68EF9_MOUSE]                                                          | 1.32  | 5 | 1  | 1  | 1   | 0.59 | 0.94 | 1.59 | 0.93 | 1.57 | 1.07 | 1.81 | 0.59 | 1.00 | 0.74 | 1.26 | 0.87 | 1.49 | 99.40 | 6.83 |
| Q61474-2 | Isoform 2 of RNA-binding protein Musashi homolog 1 OS=Mus musculus GN=Msi1 - [MS1H_MOUSE]                                    | 4.98  | 3 | 1  | 1  | 1   | 1.16 | 0.88 | 0.75 | 0.86 | 0.74 | 0.51 | 0.43 | 0.59 | 0.51 | 0.69 | 0.59 | 0.71 | 0.62 | 34.01 | 9.66 |



|          |                                                                                                                                     |       |   |   |    |    |      |      |       |      |      |      |      |      |      |      |      |      |      |       |      |
|----------|-------------------------------------------------------------------------------------------------------------------------------------|-------|---|---|----|----|------|------|-------|------|------|------|------|------|------|------|------|------|------|-------|------|
| Q922B6   | E3 ubiquitin-protein ligase TRAF7<br>OS=Mus musculus<br>GN=Traf7 PE=1 SV=1<br>-[TRAF7_MOUSE]                                        | 2.53  | 3 | 1 | 1  | 2  | 1.00 | 1.20 | 1.20  | 1.07 | 1.07 | 0.87 | 0.87 | 0.59 | 0.59 | 1.12 | 1.13 | 1.08 | 1.09 | 66.44 | 6.99 |
| Q9CSP9-4 | Isoform 4 of<br>Tetratricopeptide repeat<br>protein 14 OS=Mus<br>musculus GN=Ttc14 -<br>[TTC14_MOUSE]                               | 1.55  | 4 | 1 | 1  | 1  | 0.85 | 0.95 | 1.11  | 0.68 | 0.80 | 0.46 | 0.53 | 0.59 | 0.69 | 0.43 | 0.50 | 0.59 | 0.69 | 80.94 | 9.13 |
| Q9JHE3   | Neutral ceramidase<br>OS=Mus musculus<br>GN=Asah2 PE=1<br>SV=1 -<br>[ASAH2_MOUSE]                                                   | 3.31  | 1 | 2 | 2  | 3  | 0.88 | 1.04 | 1.18  | 0.94 | 1.07 | 0.77 | 0.87 | 0.60 | 0.67 | 0.70 | 0.80 | 0.62 | 0.71 | 83.46 | 6.86 |
| F6QKK2   | ADP-ribosylation<br>factor-like protein 8A<br>(Fragment) OS=Mus<br>musculus GN=Arl8a<br>PE=4 SV=1 -<br>[F6QKK2_MOUSE]               | 47.88 | 2 | 3 | 7  | 23 | 1.15 | 0.93 | 0.80  | 1.12 | 0.98 | 0.68 | 0.72 | 0.60 | 0.63 | 0.64 | 0.66 | 0.69 | 0.78 | 18.85 | 8.16 |
| Q91V61-2 | Isoform 2 of<br>Sideroflexin-3<br>OS=Mus musculus<br>GN=Sfxn3 -<br>[SFXN3_MOUSE]                                                    | 46.53 | 3 | 8 | 10 | 38 | 0.92 | 1.36 | 1.32  | 1.30 | 1.43 | 0.60 | 0.67 | 0.60 | 0.63 | 0.77 | 0.84 | 0.76 | 0.84 | 31.64 | 9.45 |
| Q6WVG3   | BTB/POZ domain-<br>containing protein<br>KCTD12 OS=Mus<br>musculus GN=Kctd12<br>PE=1 SV=1 -<br>[KCD12_MOUSE]                        | 37.92 | 1 | 7 | 8  | 26 | 1.09 | 0.98 | 0.98  | 0.90 | 0.84 | 0.57 | 0.56 | 0.60 | 0.51 | 0.60 | 0.58 | 0.64 | 0.61 | 35.87 | 5.81 |
| Q99PI8   | Reticulon-4 receptor<br>OS=Mus musculus<br>GN=Rtn4r PE=2 SV=1<br>-[RTN4R_MOUSE]                                                     | 19.03 | 1 | 5 | 5  | 7  | 0.88 | 1.03 | 1.10  | 0.94 | 1.07 | 0.67 | 0.74 | 0.60 | 0.64 | 0.67 | 0.72 | 0.72 | 0.81 | 50.96 | 8.69 |
| Q60994   | Adiponectin OS=Mus<br>musculus GN=Adipoq<br>PE=1 SV=2 -<br>[ADIPO_MOUSE]                                                            | 8.91  | 2 | 2 | 2  | 4  | 1.15 | 1.18 | 1.03  | 0.97 | 0.84 | 0.63 | 0.54 | 0.60 | 0.52 | 0.73 | 0.64 | 0.69 | 0.61 | 26.79 | 5.57 |
| Q9WU10   | Homeobox protein<br>MIXL1 OS=Mus<br>musculus GN=Mixl1<br>PE=1 SV=1 -<br>[MIXL1_MOUSE]                                               | 8.23  | 1 | 1 | 1  | 1  | 1.76 | 2.38 | 1.35  | 0.88 | 0.50 | 0.54 | 0.30 | 0.60 | 0.34 | 0.95 | 0.54 | 0.86 | 0.49 | 24.83 | 8.81 |
| Q9JME7   | Trafficking protein<br>particle complex<br>subunit 2-like protein<br>OS=Mus musculus<br>GN=Trappc2l PE=2<br>SV=1 -<br>[TPC2L_MOUSE] | 10.07 | 1 | 1 | 1  | 2  | 1.01 | 0.96 | 0.94  | 1.22 | 1.20 | 0.90 | 0.88 | 0.60 | 0.59 | 1.02 | 1.01 | 1.12 | 1.10 | 16.01 | 6.77 |
| Q99LI2   | Chloride channel CLIC-<br>like protein 1 OS=Mus<br>musculus GN=Clic1<br>PE=1 SV=1 -<br>[CLCC1_MOUSE]                                | 6.49  | 2 | 3 | 3  | 5  | 1.01 | 1.36 | 1.35  | 1.02 | 1.02 | 0.84 | 0.83 | 0.60 | 0.73 | 0.88 | 0.87 | 1.04 | 0.94 | 60.58 | 5.68 |
| Q8BIY1   | G patch domain-<br>containing protein 3<br>OS=Mus musculus<br>GN=Gpatch3 PE=2<br>SV=1 -<br>[GPTC3_MOUSE]                            | 2.29  | 1 | 1 | 1  | 1  | 0.51 | 5.25 | 10.18 | 0.50 | 0.96 | 0.57 | 1.10 | 0.60 | 1.16 | 0.58 | 1.14 | 0.53 | 1.03 | 59.14 | 5.05 |

|        |                                                                                                                 |       |   |    |    |    |      |      |      |      |      |      |      |      |      |      |      |      |      |       |      |
|--------|-----------------------------------------------------------------------------------------------------------------|-------|---|----|----|----|------|------|------|------|------|------|------|------|------|------|------|------|------|-------|------|
| Q5SWT3 | Solute carrier family 25 member 35 OS=Mus musculus GN=Slc25a35 PE=2 SV=2 - [S2535_MOUSE]                        | 2.67  | 1 | 1  | 1  | 2  | 0.99 | 1.36 | 1.36 | 1.13 | 1.14 | 0.61 | 0.61 | 0.60 | 0.60 | 0.71 | 0.72 | 0.89 | 0.90 | 32.61 | 9.52 |
| Q9DB50 | AP-1 complex subunit sigma-2 OS=Mus musculus GN=Ap1s2 PE=2 SV=1 - [AP1S2_MOUSE]                                 | 13.13 | 4 | 1  | 2  | 3  | 0.98 | 1.21 | 1.24 | 1.14 | 1.17 | 0.71 | 0.72 | 0.60 | 0.61 | 0.74 | 0.76 | 0.72 | 0.74 | 18.92 | 5.48 |
| Q9CR62 | Mitochondrial 2-oxoglutarate/malate carrier protein OS=Mus musculus GN=Slc25a11 PE=1 SV=3 - [M2OM_MOUSE]        | 39.17 | 3 | 10 | 10 | 23 | 1.12 | 1.32 | 1.08 | 1.29 | 1.15 | 0.60 | 0.56 | 0.60 | 0.51 | 0.77 | 0.66 | 0.90 | 0.76 | 34.13 | 9.94 |
| Q8CIG1 | Protein argonaute-1 OS=Mus musculus GN=Ago1 PE=1 SV=2 - [AGO1_MOUSE]                                            | 12.02 | 4 | 4  | 8  | 18 | 1.03 | 1.10 | 1.05 | 0.90 | 0.92 | 0.51 | 0.47 | 0.60 | 0.55 | 0.55 | 0.52 | 0.75 | 0.74 | 97.15 | 9.16 |
| P70677 | Caspase-3 OS=Mus musculus GN=Casp3 PE=1 SV=1 - [CASP3_MOUSE]                                                    | 23.47 | 1 | 5  | 5  | 16 | 1.21 | 0.86 | 0.72 | 0.98 | 0.85 | 0.66 | 0.53 | 0.60 | 0.50 | 0.67 | 0.59 | 0.72 | 0.64 | 31.45 | 6.92 |
| Q91YN0 | Uncharacterized protein C12orf4 homolog OS=Mus musculus GN=D6Wsu163e PE=1 SV=1 - [CL004_MOUSE]                  | 4.35  | 1 | 1  | 1  | 2  | 0.89 | 0.72 | 0.81 | 0.74 | 0.83 | 0.75 | 0.84 | 0.60 | 0.67 | 0.66 | 0.74 | 0.74 | 0.83 | 63.60 | 6.18 |
| P49722 | Proteasome subunit alpha type-2 OS=Mus musculus GN=Psm2 PE=1 SV=3 - [PSA2_MOUSE]                                | 46.58 | 1 | 9  | 9  | 34 | 0.88 | 0.98 | 1.13 | 1.04 | 1.21 | 0.69 | 0.77 | 0.60 | 0.77 | 0.69 | 0.76 | 0.68 | 0.81 | 25.91 | 7.43 |
| P00405 | Cytochrome c oxidase subunit 2 OS=Mus musculus GN=Mtco2 PE=1 SV=1 - [COX2_MOUSE]                                | 13.22 | 1 | 2  | 2  | 7  | 0.94 | 0.89 | 1.17 | 1.12 | 1.22 | 0.59 | 0.69 | 0.61 | 0.67 | 0.73 | 0.79 | 0.73 | 0.80 | 25.96 | 4.73 |
| P85094 | Isochorismatase domain-containing protein 2A, mitochondrial OS=Mus musculus GN=Isoc2a PE=2 SV=1 - [ISC2A_MOUSE] | 38.35 | 1 | 4  | 4  | 16 | 1.02 | 0.98 | 0.98 | 1.02 | 1.01 | 0.68 | 0.72 | 0.61 | 0.61 | 0.74 | 0.73 | 0.83 | 0.82 | 22.40 | 8.02 |
| O70435 | Proteasome subunit alpha type-3 OS=Mus musculus GN=Psm3 PE=1 SV=3 - [PSA3_MOUSE]                                | 24.31 | 5 | 6  | 6  | 17 | 0.86 | 0.92 | 1.01 | 1.00 | 1.13 | 0.61 | 0.75 | 0.61 | 0.73 | 0.60 | 0.67 | 0.75 | 0.83 | 28.39 | 5.44 |
| O09131 | Glutathione S-transferase omega-1 OS=Mus musculus GN=Gsto1 PE=2 SV=2 - [GSTO1_MOUSE]                            | 23.75 | 3 | 6  | 6  | 13 | 0.92 | 0.78 | 0.81 | 0.89 | 0.93 | 0.66 | 0.70 | 0.61 | 0.67 | 0.64 | 0.71 | 0.66 | 0.72 | 27.48 | 7.36 |
| Q9CZP5 | Mitochondrial chaperone BCS1 OS=Mus musculus GN=Bcs11 PE=1 SV=1 - [BCS1_MOUSE]                                  | 8.13  | 1 | 3  | 3  | 4  | 0.89 | 0.98 | 1.17 | 1.11 | 1.25 | 0.62 | 0.69 | 0.61 | 0.68 | 0.86 | 0.97 | 0.80 | 1.04 | 47.38 | 7.93 |

|          |                                                                                                                     |       |   |    |    |     |      |      |      |      |      |      |      |      |      |      |      |      |      |       |      |
|----------|---------------------------------------------------------------------------------------------------------------------|-------|---|----|----|-----|------|------|------|------|------|------|------|------|------|------|------|------|------|-------|------|
| Q61327   | Sodium-dependent dopamine transporter OS=Mus musculus GN=Slc6a3 PE=1 SV=2 - [SC6A3_MOUSE]                           | 1.29  | 1 | 1  | 1  | 1   | 0.88 | 0.83 | 0.95 | 1.37 | 1.56 | 1.00 | 1.14 | 0.61 | 0.69 | 1.26 | 1.44 | 1.89 | 2.17 | 68.76 | 7.21 |
| P62881-2 | Isoform 2 of Guanine nucleotide-binding protein subunit beta-5 OS=Mus musculus GN=Gnb5 - [GBB5_MOUSE]               | 36.83 | 2 | 12 | 12 | 42  | 0.91 | 0.89 | 0.96 | 0.96 | 1.02 | 0.70 | 0.74 | 0.61 | 0.67 | 0.63 | 0.70 | 0.63 | 0.71 | 38.71 | 6.06 |
| Q99PT1   | Rho GDP-dissociation inhibitor 1 OS=Mus musculus GN=Arhgdia PE=1 SV=3 - [GDIR1_MOUSE]                               | 67.16 | 1 | 15 | 15 | 114 | 1.06 | 0.90 | 0.84 | 1.00 | 0.96 | 0.63 | 0.59 | 0.61 | 0.59 | 0.60 | 0.58 | 0.61 | 0.57 | 23.39 | 5.20 |
| Q8C0J6   | Ankyrin repeat domain-containing protein SOWAHC OS=Mus musculus GN=Sowahc PE=2 SV=2 - [SWAHC_MOUSE]                 | 3.32  | 1 | 1  | 1  | 2   | 0.80 | 1.03 | 1.28 | 0.71 | 0.89 | 1.05 | 1.30 | 0.61 | 0.76 | 1.07 | 1.33 | 0.70 | 0.88 | 54.90 | 6.00 |
| O88653   | Regulator complex protein LAMTOR3 OS=Mus musculus GN=Lamtor3 PE=1 SV=1 - [LTOR3_MOUSE]                              | 8.87  | 1 | 1  | 1  | 2   | 1.18 | 0.54 | 0.46 | 0.81 | 0.69 | 0.64 | 0.54 | 0.61 | 0.52 | 0.50 | 0.43 | 0.52 | 0.44 | 13.54 | 7.34 |
| Q9CQM9   | Glutaredoxin-3 OS=Mus musculus GN=Glx3 PE=1 SV=1 - [GLRX3_MOUSE]                                                    | 45.40 | 1 | 13 | 13 | 89  | 1.02 | 0.77 | 0.76 | 0.87 | 0.85 | 0.56 | 0.55 | 0.61 | 0.60 | 0.57 | 0.60 | 0.60 | 0.63 | 37.75 | 5.59 |
| Q9QUP5   | Hyaluronan and proteoglycan link protein 1 OS=Mus musculus GN=Hapln1 PE=2 SV=1 - [HPLN1_MOUSE]                      | 57.02 | 1 | 16 | 17 | 80  | 0.94 | 0.85 | 0.93 | 0.90 | 0.97 | 0.62 | 0.70 | 0.61 | 0.67 | 0.67 | 0.73 | 0.72 | 0.73 | 40.45 | 7.80 |
| Q8R3W2   | MCG6979, isoform CRA_a OS=Mus musculus GN=0610009B22Rik PE=2 SV=1 - [Q8R3W2_MOUSE]                                  | 18.57 | 2 | 2  | 2  | 4   | 0.78 | 0.98 | 1.25 | 0.80 | 1.03 | 0.62 | 0.79 | 0.61 | 0.79 | 0.56 | 0.72 | 0.69 | 0.89 | 16.43 | 6.61 |
| Q80V42   | Carboxypeptidase M OS=Mus musculus GN=Cpm PE=2 SV=2 - [CBPM_MOUSE]                                                  | 23.25 | 2 | 6  | 6  | 12  | 0.80 | 0.90 | 1.07 | 0.91 | 1.06 | 0.71 | 0.87 | 0.61 | 0.86 | 0.72 | 0.86 | 0.66 | 0.83 | 50.52 | 7.78 |
| Q8CA71   | Protein shisa-4 OS=Mus musculus GN=Shisa4 PE=2 SV=1 - [SHSA4_MOUSE]                                                 | 4.57  | 1 | 1  | 1  | 2   | 1.05 | 1.16 | 1.10 | 1.21 | 1.16 | 0.85 | 0.81 | 0.62 | 0.59 | 0.87 | 0.84 | 1.03 | 0.98 | 21.47 | 7.42 |
| Q9R1E6   | Ectonucleotide pyrophosphatase/phosphodiesterase family member 2 OS=Mus musculus GN=Enpp2 PE=1 SV=3 - [ENPP2_MOUSE] | 2.44  | 4 | 2  | 2  | 3   | 0.95 | 0.85 | 0.89 | 1.08 | 1.13 | 0.85 | 0.88 | 0.62 | 0.64 | 0.66 | 0.70 | 0.55 | 0.58 | 98.82 | 7.27 |

|        |                                                                                                               |       |   |    |    |     |      |      |      |      |      |      |      |      |      |      |      |      |      |        |      |
|--------|---------------------------------------------------------------------------------------------------------------|-------|---|----|----|-----|------|------|------|------|------|------|------|------|------|------|------|------|------|--------|------|
| Q8CCH2 | NHL repeat-containing protein 3 OS=Mus musculus GN=Nhlrc3 PE=2 SV=1 - [NHLRC3_MOUSE]                          | 9.80  | 1 | 2  | 2  | 3   | 1.05 | 0.94 | 0.89 | 0.88 | 0.83 | 0.53 | 0.51 | 0.62 | 0.58 | 0.89 | 0.85 | 0.80 | 0.76 | 38.17  | 6.23 |
| P07724 | Serum albumin OS=Mus musculus GN=Alb PE=1 SV=3 - [ALBU_MOUSE]                                                 | 74.51 | 1 | 41 | 41 | 409 | 0.94 | 0.81 | 0.86 | 0.58 | 0.60 | 0.53 | 0.56 | 0.62 | 0.65 | 0.67 | 0.71 | 0.52 | 0.56 | 68.65  | 6.07 |
| Q91YA2 | Serine/threonine-protein kinase H1 OS=Mus musculus GN=Pskh1 PE=2 SV=3 - [KPSH1_MOUSE]                         | 4.01  | 1 | 1  | 1  | 3   | 1.00 | 0.57 | 0.57 | 0.89 | 0.89 | 0.56 | 0.56 | 0.62 | 0.62 | 0.55 | 0.55 | 0.49 | 0.49 | 48.07  | 9.83 |
| Q8R238 | Serine dehydratase-like OS=Mus musculus GN=Sdsl PE=2 SV=1 - [SDSL_MOUSE]                                      | 7.90  | 2 | 2  | 2  | 4   | 0.74 | 0.75 | 1.01 | 0.67 | 0.91 | 0.56 | 0.76 | 0.62 | 0.84 | 0.60 | 0.82 | 0.59 | 0.81 | 34.71  | 6.43 |
| Q9ER35 | Fructosamine-3-kinase OS=Mus musculus GN=Fn3k PE=2 SV=1 - [FN3K_MOUSE]                                        | 18.77 | 3 | 5  | 5  | 9   | 0.98 | 1.08 | 1.05 | 0.95 | 0.94 | 0.58 | 0.69 | 0.62 | 0.66 | 0.56 | 0.64 | 0.61 | 0.68 | 35.01  | 8.40 |
| Q9D404 | 3-oxoacyl-[acyl-carrier-protein] synthase, mitochondrial OS=Mus musculus GN=Oxsm PE=2 SV=1 - [OXSM_MOUSE]     | 19.39 | 2 | 6  | 6  | 14  | 1.00 | 0.91 | 0.90 | 0.84 | 0.85 | 0.66 | 0.63 | 0.62 | 0.62 | 0.71 | 0.64 | 0.77 | 0.92 | 48.60  | 7.06 |
| Q8BR65 | Sin3 histone deacetylase corepressor complex component SDS3 OS=Mus musculus GN=Suds3 PE=1 SV=1 - [SDS3_MOUSE] | 5.49  | 1 | 1  | 1  | 2   | 0.89 | 0.77 | 0.86 | 0.85 | 0.96 | 0.73 | 0.82 | 0.62 | 0.70 | 0.69 | 0.78 | 0.71 | 0.80 | 38.08  | 5.66 |
| P51881 | ADP/ATP translocase 2 OS=Mus musculus GN=Slc25a5 PE=1 SV=3 - [ADT2_MOUSE]                                     | 54.36 | 2 | 9  | 17 | 150 | 1.09 | 1.13 | 1.04 | 1.34 | 1.26 | 0.69 | 0.60 | 0.62 | 0.55 | 0.79 | 0.68 | 0.84 | 0.79 | 32.91  | 9.73 |
| D3YXJ2 | Protein Gm9920 OS=Mus musculus GN=Gm9920 PE=2 SV=1 - [D3YXJ2_MOUSE]                                           | 34.13 | 1 | 1  | 1  | 1   | 0.90 | 0.79 | 0.88 | 0.99 | 1.10 | 0.42 | 0.47 | 0.62 | 0.69 | 0.38 | 0.42 | 0.45 | 0.50 | 13.44  | 7.56 |
| Q60692 | Proteasome subunit beta type-6 OS=Mus musculus GN=Psb6 PE=1 SV=3 - [PSB6_MOUSE]                               | 38.24 | 1 | 6  | 6  | 21  | 0.81 | 1.22 | 1.43 | 0.94 | 1.15 | 0.66 | 0.82 | 0.62 | 0.82 | 0.62 | 0.84 | 0.73 | 0.90 | 25.36  | 5.11 |
| Q8BGU2 | Cerebellin-2 OS=Mus musculus GN=Cbln2 PE=1 SV=1 - [CBLN2_MOUSE]                                               | 14.73 | 1 | 2  | 3  | 7   | 1.05 | 0.88 | 0.83 | 0.85 | 0.83 | 0.64 | 0.60 | 0.62 | 0.59 | 0.54 | 0.51 | 0.56 | 0.57 | 24.04  | 8.18 |
| Q8BUR4 | Dedicator of cytokinesis protein 1 OS=Mus musculus GN=Dock1 PE=1 SV=3 - [DOCK1_MOUSE]                         | 1.13  | 1 | 1  | 1  | 4   | 0.98 | 0.65 | 0.67 | 0.81 | 0.83 | 0.47 | 0.48 | 0.62 | 0.64 | 0.64 | 0.65 | 0.51 | 0.52 | 214.95 | 7.62 |
| P03899 | NADH-ubiquinone oxidoreductase chain 3 OS=Mus musculus GN=Mtd3 PE=3 SV=3 - [NU3M_MOUSE]                       | 13.04 | 1 | 1  | 1  | 4   | 1.11 | 1.37 | 1.24 | 1.48 | 1.34 | 0.60 | 0.54 | 0.62 | 0.56 | 0.77 | 0.69 | 1.11 | 1.01 | 13.21  | 4.64 |

|        |                                                                                                              |       |   |   |   |    |      |      |      |      |      |      |      |      |      |      |      |      |      |       |      |
|--------|--------------------------------------------------------------------------------------------------------------|-------|---|---|---|----|------|------|------|------|------|------|------|------|------|------|------|------|------|-------|------|
| Q8R1G2 | Carboxymethylenebutanolidase homolog<br>OS=Mus musculus<br>GN=Cmb1 PE=2 SV=1<br>-[CMBL_MOUSE]                | 15.51 | 3 | 3 | 3 | 6  | 1.28 | 0.87 | 0.68 | 0.89 | 0.72 | 0.60 | 0.48 | 0.62 | 0.51 | 0.66 | 0.54 | 0.72 | 0.57 | 27.88 | 7.18 |
| O88968 | Transcobalamin-2<br>OS=Mus musculus<br>GN=Tcn2 PE=2 SV=1<br>-[TCO2_MOUSE]                                    | 5.58  | 1 | 1 | 1 | 2  | 1.00 | 0.88 | 0.88 | 0.91 | 0.91 | 0.62 | 0.62 | 0.63 | 0.62 | 0.58 | 0.58 | 0.57 | 0.57 | 47.56 | 6.33 |
| P27545 | Ceramide synthase 1<br>OS=Mus musculus<br>GN=Cers1 PE=1 SV=1<br>-[CERS1_MOUSE]                               | 4.57  | 1 | 1 | 1 | 1  | 1.15 | 2.59 | 2.24 | 1.37 | 1.19 | 0.85 | 0.73 | 0.63 | 0.54 | 0.98 | 0.85 | 1.13 | 0.98 | 40.07 | 8.38 |
| Q8BGF3 | WD repeat-containing protein 92<br>OS=Mus musculus<br>GN=Wdr92 PE=2 SV=1<br>-[WDR92_MOUSE]                   | 5.60  | 1 | 2 | 2 | 2  | 0.94 | 1.00 | 1.06 | 0.79 | 0.83 | 0.53 | 0.56 | 0.63 | 0.66 | 0.58 | 0.62 | 0.70 | 0.75 | 39.77 | 8.15 |
| Q61599 | Rho GDP-dissociation inhibitor 2<br>OS=Mus musculus<br>GN=Arhgdib PE=1 SV=3<br>-[GDIR2_MOUSE]                | 38.50 | 2 | 4 | 4 | 28 | 0.85 | 0.74 | 0.85 | 0.97 | 1.13 | 0.67 | 0.73 | 0.63 | 0.70 | 0.69 | 0.77 | 0.75 | 0.86 | 22.84 | 5.11 |
| P35290 | Ras-related protein Rab24<br>OS=Mus musculus<br>GN=Rab24 PE=1 SV=2<br>-[RAB24_MOUSE]                         | 19.21 | 1 | 4 | 4 | 11 | 0.93 | 0.85 | 1.00 | 1.00 | 1.00 | 0.66 | 0.69 | 0.63 | 0.62 | 0.65 | 0.71 | 0.84 | 0.84 | 23.13 | 6.23 |
| P61971 | Nuclear transport factor 2<br>OS=Mus musculus<br>GN=Nuf2 PE=2 SV=1<br>-[NTF2_MOUSE]                          | 44.88 | 1 | 3 | 3 | 12 | 0.95 | 0.92 | 0.97 | 1.00 | 0.98 | 0.62 | 0.70 | 0.63 | 0.67 | 0.72 | 0.74 | 0.67 | 0.72 | 14.47 | 5.38 |
| G5E8Q5 | DCN1-like protein 2<br>OS=Mus musculus<br>GN=Dcn1d2 PE=4 SV=1<br>-[G5E8Q5_MOUSE]                             | 17.77 | 5 | 1 | 3 | 5  | 1.79 | 1.20 | 0.67 | 1.12 | 0.62 | 0.90 | 0.50 | 0.63 | 0.35 | 0.54 | 0.30 | 0.99 | 0.56 | 22.75 | 7.97 |
| Q8CII5 | Nucleolysin TIA-1<br>OS=Mus musculus<br>GN=Tia1 PE=2 SV=1<br>-[Q8CII5_MOUSE]                                 | 14.39 | 7 | 1 | 4 | 5  | 0.82 | 0.97 | 1.17 | 0.89 | 1.08 | 0.67 | 0.81 | 0.63 | 0.76 | 0.72 | 0.88 | 0.71 | 0.87 | 31.56 | 8.29 |
| Q8BGT1 | Fibronectin leucine rich transmembrane protein 3<br>OS=Mus musculus<br>GN=Flrt3 PE=2 SV=1<br>-[Q8BGT1_MOUSE] | 7.70  | 1 | 3 | 4 | 8  | 1.09 | 0.78 | 0.74 | 1.01 | 0.94 | 0.74 | 0.67 | 0.63 | 0.60 | 0.61 | 0.57 | 0.68 | 0.65 | 72.83 | 8.06 |
| P00015 | Cytochrome c, testis-specific<br>OS=Mus musculus<br>GN=Cyct PE=1 SV=3<br>-[CYC2_MOUSE]                       | 25.71 | 1 | 1 | 3 | 21 | 0.82 | 0.49 | 0.59 | 0.58 | 0.70 | 0.56 | 0.68 | 0.63 | 0.76 | 0.52 | 0.63 | 0.53 | 0.64 | 11.71 | 9.51 |
| Q3U595 | UPF0545 protein C22orf39 homolog<br>OS=Mus musculus<br>PE=2 SV=1<br>-[CV039_MOUSE]                           | 7.62  | 1 | 1 | 1 | 1  | 0.70 | 0.92 | 1.30 | 0.88 | 1.25 | 0.68 | 0.97 | 0.63 | 0.89 | 0.75 | 1.06 | 0.84 | 1.20 | 12.50 | 8.12 |

|        |                                                                                                                           |       |   |    |    |     |      |      |      |      |      |      |      |      |      |      |      |      |      |        |      |
|--------|---------------------------------------------------------------------------------------------------------------------------|-------|---|----|----|-----|------|------|------|------|------|------|------|------|------|------|------|------|------|--------|------|
| Q9QWW1 | Isoform 2 of Homer protein homolog 2<br>OS=Mus musculus<br>GN=Homer2 -<br>[HOME2_MOUSE]                                   | 39.36 | 4 | 14 | 15 | 33  | 1.13 | 0.86 | 0.78 | 0.93 | 0.84 | 0.61 | 0.53 | 0.63 | 0.57 | 0.53 | 0.44 | 0.60 | 0.53 | 39.44  | 6.38 |
| O08966 | Solute carrier family 22 member 1 OS=Mus musculus<br>GN=Slc22a1<br>PE=2 SV=2 -<br>[S22A1_MOUSE]                           | 2.88  | 1 | 1  | 1  | 1   | 1.29 | 1.05 | 0.81 | 0.73 | 0.57 | 0.52 | 0.40 | 0.63 | 0.49 | 0.53 | 0.41 | 0.68 | 0.53 | 61.48  | 6.67 |
| P48962 | ADP/ATP translocase 1 OS=Mus musculus<br>GN=Slc25a4<br>PE=1<br>SV=4 -<br>[ADT1_MOUSE]                                     | 67.45 | 2 | 12 | 20 | 170 | 1.01 | 1.13 | 1.17 | 1.34 | 1.31 | 0.67 | 0.66 | 0.63 | 0.63 | 0.78 | 0.79 | 0.79 | 0.85 | 32.88  | 9.72 |
| H3BK32 | Sentrin-specific protease 6 (Fragment)<br>OS=Mus musculus<br>GN=Senp6<br>PE=2<br>SV=1 -<br>[H3BK32_MOUSE]                 | 1.31  | 4 | 1  | 1  | 1   | 5.24 | 7.13 | 1.36 | 0.76 | 0.15 | 0.59 | 0.11 | 0.63 | 0.12 | 0.57 | 0.11 | 0.68 | 0.13 | 103.64 | 6.37 |
| Q8VEM8 | Phosphate carrier protein, mitochondrial<br>OS=Mus musculus<br>GN=Slc25a3<br>PE=1<br>SV=1 -<br>[MPCP_MOUSE]               | 27.17 | 2 | 10 | 10 | 60  | 0.99 | 1.25 | 1.10 | 1.28 | 1.23 | 0.67 | 0.65 | 0.63 | 0.64 | 0.78 | 0.80 | 0.88 | 0.82 | 39.61  | 9.26 |
| Q8K055 | Reticulon-4 receptor-like 1 OS=Mus musculus<br>GN=Rtn4r1<br>PE=2 SV=1 -<br>[R4RL1_MOUSE]                                  | 6.29  | 1 | 2  | 2  | 4   | 0.96 | 0.92 | 0.96 | 0.94 | 0.98 | 0.68 | 0.71 | 0.63 | 0.66 | 0.69 | 0.73 | 0.76 | 0.79 | 49.80  | 8.65 |
| Q9R1P1 | Proteasome subunit beta type-3 OS=Mus musculus<br>GN=Psb3<br>PE=1 SV=1 -<br>[PSB3_MOUSE]                                  | 26.83 | 3 | 4  | 4  | 14  | 0.96 | 1.15 | 1.12 | 1.18 | 1.23 | 0.65 | 0.66 | 0.63 | 0.71 | 0.72 | 0.71 | 0.73 | 0.78 | 22.95  | 6.55 |
| Q9Z2Z6 | Mitochondrial carnitine/acylcarnitine carrier protein<br>OS=Mus musculus<br>GN=Slc25a20<br>PE=1<br>SV=1 -<br>[MCAT_MOUSE] | 4.32  | 1 | 1  | 1  | 2   | 0.61 | 0.95 | 1.55 | 1.12 | 1.84 | 0.68 | 1.11 | 0.63 | 1.03 | 0.95 | 1.56 | 0.72 | 1.18 | 33.00  | 9.11 |
| Q9QUM9 | Proteasome subunit alpha type-6 OS=Mus musculus<br>GN=Psm6<br>PE=1 SV=1 -<br>[PSA6_MOUSE]                                 | 45.12 | 3 | 12 | 12 | 92  | 0.78 | 1.11 | 1.40 | 0.97 | 1.24 | 0.64 | 0.78 | 0.63 | 0.78 | 0.64 | 0.82 | 0.64 | 0.84 | 27.35  | 6.76 |
| E0CY96 | tRNA-splicing endonuclease subunit Sen15 OS=Mus musculus<br>GN=Tsen15<br>PE=2 SV=1 -<br>[E0CY96_MOUSE]                    | 29.69 | 3 | 2  | 2  | 3   | 0.83 | 0.93 | 1.12 | 0.79 | 0.96 | 0.62 | 0.74 | 0.63 | 0.77 | 0.73 | 0.88 | 0.66 | 0.80 | 14.01  | 4.41 |
| Q8BG73 | SH3 domain-binding glutamic acid-rich-like protein 2 OS=Mus musculus<br>GN=Sh3bgrl2<br>PE=1<br>SV=1 -<br>[SH3L2_MOUSE]    | 46.73 | 1 | 5  | 5  | 55  | 0.89 | 0.69 | 0.83 | 0.80 | 0.95 | 0.62 | 0.71 | 0.64 | 0.71 | 0.55 | 0.63 | 0.59 | 0.69 | 12.25  | 5.55 |
| P63300 | Selenoprotein W OS=Mus musculus<br>GN=Sepw1<br>PE=1<br>SV=3 -<br>[SELW_MOUSE]                                             | 14.77 | 1 | 1  | 1  | 2   | 1.00 | 0.53 | 0.53 | 0.90 | 0.91 | 0.67 | 0.67 | 0.64 | 0.64 | 0.60 | 0.60 | 0.63 | 0.64 | 9.68   | 8.72 |

|          |                                                                                                                                     |       |   |    |    |     |      |      |      |      |      |      |      |      |      |      |      |      |      |        |       |      |
|----------|-------------------------------------------------------------------------------------------------------------------------------------|-------|---|----|----|-----|------|------|------|------|------|------|------|------|------|------|------|------|------|--------|-------|------|
| E9QLX9   | Myb-related protein A<br>OS=Mus musculus<br>GN=Mybl1 PE=2<br>SV=1 -<br>[E9QLX9_MOUSE]                                               | 2.89  | 3 | 1  | 1  | 1   | 1    | 0.80 | 0.63 | 0.79 | 0.83 | 1.04 | 0.75 | 0.93 | 0.64 | 0.80 | 0.70 | 0.87 | 0.75 | 0.94   | 78.68 | 6.55 |
| G3UZW8   | Proteasome subunit<br>beta type (Fragment)<br>OS=Mus musculus<br>GN=Psmb8 PE=2<br>SV=2 -<br>[G3UZW8_MOUSE]                          | 10.89 | 2 | 2  | 2  | 3   | 1.03 | 1.26 | 1.23 | 1.01 | 0.98 | 0.71 | 0.69 | 0.64 | 0.62 | 0.68 | 0.66 | 0.62 | 0.60 | 26.98  | 7.75  |      |
| P60521   | Gamma-aminobutyric<br>acid receptor-<br>associated protein-like<br>2 OS=Mus musculus<br>GN=Gabarap2 PE=1<br>SV=1 -<br>[GBR12_MOUSE] | 60.68 | 1 | 7  | 8  | 33  | 0.90 | 0.74 | 0.81 | 0.78 | 0.87 | 0.57 | 0.67 | 0.64 | 0.63 | 0.58 | 0.59 | 0.61 | 0.69 | 13.66  | 8.10  |      |
| P97434-3 | Isoform 3 of Myosin<br>phosphatase Rho-<br>interacting protein<br>OS=Mus musculus<br>GN=Mprip -<br>[MPRIP_MOUSE]                    | 30.97 | 8 | 1  | 23 | 49  | 0.68 | 1.22 | 1.78 | 0.55 | 0.81 | 0.61 | 0.88 | 0.64 | 0.93 | 0.55 | 0.81 | 0.53 | 0.78 | 114.02 | 6.37  |      |
| P70195   | Proteasome subunit<br>beta type-7 OS=Mus<br>musculus GN=Psb7<br>PE=1 SV=1 -<br>[PSB7_MOUSE]                                         | 27.08 | 1 | 6  | 6  | 15  | 0.82 | 0.98 | 1.23 | 0.99 | 1.18 | 0.79 | 0.96 | 0.64 | 0.87 | 0.64 | 0.81 | 0.66 | 0.83 | 29.87  | 7.99  |      |
| P09671   | Superoxide dismutase<br>[Mn], mitochondrial<br>OS=Mus musculus<br>GN=Scd2 PE=1 SV=3 -<br>[SODM_MOUSE]                               | 77.93 | 1 | 14 | 14 | 227 | 0.99 | 0.80 | 0.81 | 0.92 | 0.93 | 0.63 | 0.65 | 0.64 | 0.64 | 0.63 | 0.64 | 0.63 | 0.63 | 24.59  | 8.62  |      |
| Q9D9V3-  | Isoform 2 of<br>Ethylmalonyl-CoA<br>decarboxylase<br>OS=Mus musculus<br>GN=Echdc1 -<br>[ECHD1_MOUSE]                                | 22.74 | 3 | 5  | 5  | 11  | 1.01 | 1.12 | 0.86 | 1.00 | 0.95 | 0.70 | 0.65 | 0.64 | 0.61 | 0.68 | 0.68 | 0.50 | 0.53 | 32.71  | 7.02  |      |
| D6RIN1   | Protein unc-45<br>homolog A OS=Mus<br>musculus GN=Unc45a<br>PE=2 SV=1 -<br>[D6RIN1_MOUSE]                                           | 3.52  | 2 | 1  | 1  | 2   | 1.06 | 1.04 | 0.98 | 0.63 | 0.60 | 0.81 | 0.76 | 0.64 | 0.60 | 1.10 | 1.04 | 0.64 | 0.61 | 68.47  | 7.99  |      |
| O88485   | Cytoplasmic dynein 1<br>intermediate chain 1<br>OS=Mus musculus<br>GN=Dync1i1 PE=1<br>SV=2 -<br>[DC111_MOUSE]                       | 47.61 | 5 | 18 | 19 | 196 | 0.98 | 1.02 | 1.05 | 0.91 | 0.97 | 0.65 | 0.67 | 0.64 | 0.71 | 0.65 | 0.68 | 0.63 | 0.65 | 70.68  | 5.12  |      |
| Q9JMA2   | Queuine tRNA-<br>ribosyltransferase<br>OS=Mus musculus<br>GN=Qrrt1 PE=1 SV=2<br>[TGT_MOUSE]                                         | 3.47  | 1 | 1  | 1  | 2   | 1.08 | 1.59 | 1.48 | 1.07 | 0.99 | 0.72 | 0.66 | 0.64 | 0.60 | 0.78 | 0.72 | 0.91 | 0.85 | 44.06  | 7.68  |      |
| Q61171   | Peroxiredoxin-2<br>OS=Mus musculus<br>GN=Prdx2 PE=1 SV=3<br>[PRDX2_MOUSE]                                                           | 73.23 | 2 | 12 | 12 | 164 | 1.04 | 0.80 | 0.77 | 0.97 | 0.93 | 0.65 | 0.63 | 0.64 | 0.62 | 0.63 | 0.62 | 0.63 | 0.60 | 21.77  | 5.41  |      |

|          |                                                                                                          |       |   |    |    |    |      |      |      |      |      |      |      |      |      |      |      |      |      |       |       |
|----------|----------------------------------------------------------------------------------------------------------|-------|---|----|----|----|------|------|------|------|------|------|------|------|------|------|------|------|------|-------|-------|
| Q9D8Z6   | Autophagy-related protein 101 OS=Mus musculus GN=Atg101 PE=2 SV=1 - [ATGA1_MOUSE]                        | 7.34  | 1 | 1  | 1  | 3  | 1.03 | 1.32 | 1.29 | 0.91 | 0.89 | 0.60 | 0.58 | 0.64 | 0.63 | 0.70 | 0.69 | 0.64 | 0.62 | 24.99 | 6.15  |
| P01756   | Ig heavy chain V region MOPC 104E OS=Mus musculus PE=1 SV=1 - [HVM12_MOUSE]                              | 16.24 | 3 | 1  | 1  | 2  | 1.12 | 0.71 | 0.63 | 0.98 | 0.88 | 1.25 | 1.11 | 0.65 | 0.57 | 0.79 | 0.70 | 0.50 | 0.45 | 12.98 | 7.11  |
| E9Q1V6   | Asc-type amino acid transporter 1 OS=Mus musculus GN=Slc7a10 PE=2 SV=1 - [E9Q1V6_MOUSE]                  | 46.75 | 4 | 1  | 1  | 2  | 0.81 | 1.17 | 1.45 | 0.77 | 0.95 | 0.67 | 0.83 | 0.65 | 0.80 | 0.69 | 0.85 | 0.66 | 0.82 | 7.72  | 7.24  |
| Q71R19-2 | Isoform 2 of Kynurenine--oxoglutarate transaminase 3 OS=Mus musculus GN=Ccbl2 - [KAT3_MOUSE]             | 2.86  | 2 | 1  | 1  | 2  | 0.97 | 1.04 | 1.06 | 0.90 | 0.93 | 0.60 | 0.61 | 0.65 | 0.66 | 0.64 | 0.65 | 0.70 | 0.72 | 47.29 | 7.20  |
| Q64378   | Peptidyl-prolyl cis-trans isomerase FKBP5 OS=Mus musculus GN=Fkbp5 PE=1 SV=1 - [FKBP5_MOUSE]             | 4.82  | 2 | 2  | 2  | 2  | 0.91 | 0.77 | 0.85 | 0.73 | 0.80 | 0.69 | 0.75 | 0.65 | 0.71 | 0.63 | 0.70 | 0.66 | 0.73 | 50.93 | 7.80  |
| G3XA11   | Cornichon homolog 3 (Drosophila), isoform CRA_a OS=Mus musculus GN=Cnih3 PE=4 SV=1 - [G3XA11_MOUSE]      | 10.71 | 3 | 1  | 1  | 2  | 0.90 | 0.98 | 1.08 | 0.86 | 0.95 | 0.72 | 0.79 | 0.65 | 0.72 | 0.94 | 1.04 | 0.86 | 0.95 | 13.22 | 7.31  |
| Q6P2B2   | Casein kinase I isoform gamma-1 OS=Mus musculus GN=Csnk1g1 PE=2 SV=1 - [Q6P2B2_MOUSE]                    | 4.65  | 2 | 1  | 3  | 3  | 0.84 | 0.84 | 1.01 | 0.97 | 1.16 | 0.54 | 0.64 | 0.65 | 0.77 | 0.70 | 0.83 | 0.70 | 0.84 | 49.57 | 8.97  |
| Q8K215   | LYR motif-containing protein 4 OS=Mus musculus GN=Lym4 PE=2 SV=1 - [LYRM4_MOUSE]                         | 10.99 | 1 | 1  | 1  | 1  | 0.99 | 0.65 | 0.66 | 0.93 | 0.94 | 0.71 | 0.71 | 0.65 | 0.66 | 0.64 | 0.65 | 0.73 | 0.74 | 10.85 | 10.13 |
| Q8C0L8   | Conserved oligomeric Golgi complex subunit 5 OS=Mus musculus GN=Cog5 PE=2 SV=3 - [COG5_MOUSE]            | 1.93  | 1 | 1  | 1  | 1  | 0.98 | 0.77 | 0.78 | 0.80 | 0.82 | 0.56 | 0.57 | 0.65 | 0.66 | 0.56 | 0.57 | 0.67 | 0.68 | 91.33 | 6.27  |
| J3QMM7   | ATP-dependent (S)-NAD(P)H-hydrate dehydratase OS=Mus musculus GN=Carkd PE=3 SV=1 - [J3QMM7_MOUSE]        | 51.68 | 7 | 11 | 11 | 45 | 0.96 | 1.07 | 1.12 | 0.96 | 0.96 | 0.73 | 0.80 | 0.65 | 0.71 | 0.71 | 0.81 | 0.75 | 0.82 | 35.15 | 8.13  |
| Q9D0I6   | WD repeat, SAM and U-box domain-containing protein 1 OS=Mus musculus GN=Wdsub1 PE=2 SV=1 - [WSDU1_MOUSE] | 7.38  | 1 | 2  | 2  | 4  | 0.90 | 0.80 | 0.88 | 0.88 | 0.97 | 0.56 | 0.61 | 0.65 | 0.72 | 0.68 | 0.75 | 0.71 | 0.78 | 51.66 | 6.34  |



|        |                                                                                                                          |       |   |    |    |    |      |      |      |      |      |      |      |      |      |      |      |      |      |       |       |
|--------|--------------------------------------------------------------------------------------------------------------------------|-------|---|----|----|----|------|------|------|------|------|------|------|------|------|------|------|------|------|-------|-------|
| D3Z1E2 | Pleckstrin homology domain-containing family B member 1 (Fragment) OS=Mus musculus GN=Plekhh1 PE=2 SV=1 - [D3Z1E2_MOUSE] | 27.05 | 8 | 3  | 3  | 9  | 1.04 | 1.21 | 1.15 | 0.87 | 0.82 | 0.61 | 0.58 | 0.66 | 0.59 | 0.66 | 0.61 | 0.71 | 0.68 | 14.35 | 6.32  |
| P59235 | Nucleoporin Nup43 OS=Mus musculus GN=Nup43 PE=2 SV=2 - [NUP43_MOUSE]                                                     | 4.21  | 1 | 1  | 1  | 2  | 0.80 | 0.88 | 1.10 | 0.88 | 1.09 | 0.56 | 0.69 | 0.66 | 0.81 | 0.65 | 0.80 | 0.71 | 0.89 | 41.96 | 5.39  |
| Q99LH2 | Phosphatidylserine synthase 1 OS=Mus musculus GN=Ptdss1 PE=2 SV=1 - [PTSS1_MOUSE]                                        | 2.96  | 1 | 1  | 1  | 2  | 1.14 | 1.13 | 0.99 | 1.32 | 1.16 | 0.82 | 0.71 | 0.66 | 0.57 | 0.89 | 0.78 | 0.89 | 0.78 | 55.57 | 8.28  |
| P11352 | Glutathione peroxidase 1 OS=Mus musculus GN=Gpx1 PE=1 SV=2 - [GPX1_MOUSE]                                                | 51.74 | 1 | 8  | 8  | 26 | 0.93 | 0.87 | 0.90 | 0.94 | 1.04 | 0.64 | 0.69 | 0.66 | 0.69 | 0.64 | 0.70 | 0.64 | 0.76 | 22.32 | 7.21  |
| D3YXP6 | Phosphomevalonate kinase OS=Mus musculus GN=Pmvk PE=2 SV=1 - [D3YXP6_MOUSE]                                              | 5.06  | 2 | 1  | 1  | 1  | 0.51 | 0.58 | 1.12 | 0.73 | 1.41 | 0.63 | 1.22 | 0.66 | 1.27 | 0.66 | 1.28 | 0.64 | 1.24 | 17.93 | 9.86  |
| O09061 | Proteasome subunit beta type-1 OS=Mus musculus GN=Psb1 PE=1 SV=1 - [PSB1_MOUSE]                                          | 51.67 | 1 | 10 | 10 | 52 | 0.83 | 1.18 | 1.38 | 0.98 | 1.21 | 0.68 | 0.83 | 0.66 | 0.77 | 0.65 | 0.79 | 0.65 | 0.78 | 26.36 | 7.81  |
| P01863 | Ig gamma-2A chain C region, A allele OS=Mus musculus GN=Ighg PE=1 SV=1 - [GCAA_MOUSE]                                    | 4.85  | 4 | 1  | 1  | 2  | 1.17 | 1.12 | 0.95 | 0.87 | 0.75 | 0.53 | 0.45 | 0.66 | 0.56 | 0.93 | 0.80 | 0.91 | 0.78 | 36.37 | 7.40  |
| Q9CRB8 | Mitochondrial fission process protein 1 OS=Mus musculus GN=Mtfp1 PE=1 SV=1 - [MTFP1_MOUSE]                               | 27.11 | 1 | 3  | 3  | 5  | 0.96 | 1.11 | 1.16 | 1.19 | 1.28 | 0.71 | 0.74 | 0.66 | 0.67 | 0.75 | 0.71 | 1.07 | 1.12 | 18.30 | 8.68  |
| Q8VCS7 | BTB/POZ domain-containing protein KCTD5 OS=Mus musculus GN=Kctd5 PE=2 SV=1 - [KCTD5_MOUSE]                               | 5.13  | 1 | 1  | 1  | 2  | 1.08 | 0.97 | 0.90 | 0.95 | 0.88 | 0.62 | 0.57 | 0.66 | 0.61 | 0.69 | 0.64 | 0.79 | 0.74 | 26.15 | 5.95  |
| Q07235 | Glia-derived nexin OS=Mus musculus GN=Serpine2 PE=2 SV=2 - [GDN_MOUSE]                                                   | 8.06  | 1 | 2  | 2  | 3  | 1.04 | 1.08 | 1.03 | 1.00 | 0.96 | 0.91 | 0.87 | 0.66 | 0.63 | 1.12 | 1.08 | 1.01 | 0.97 | 44.18 | 9.85  |
| Q9DD18 | D-tyrosyl-tRNA(Tyr) deacylase 1 OS=Mus musculus GN=Dtd1 PE=1 SV=2 - [DTD1_MOUSE]                                         | 34.93 | 2 | 6  | 6  | 49 | 1.11 | 1.06 | 0.96 | 0.90 | 0.88 | 0.65 | 0.60 | 0.66 | 0.64 | 0.69 | 0.61 | 0.66 | 0.63 | 23.37 | 7.87  |
| Q9D8B6 | Protein FAM210B OS=Mus musculus GN=Fam210b PE=2 SV=3 - [F210B_MOUSE]                                                     | 6.32  | 1 | 1  | 1  | 1  | 1.15 | 0.81 | 0.70 | 1.28 | 1.11 | 0.73 | 0.63 | 0.66 | 0.57 | 0.84 | 0.73 | 0.86 | 0.74 | 20.33 | 10.51 |

|        |                                                                                                                           |       |   |    |    |      |      |      |      |      |      |      |      |      |      |      |      |      |      |        |      |
|--------|---------------------------------------------------------------------------------------------------------------------------|-------|---|----|----|------|------|------|------|------|------|------|------|------|------|------|------|------|------|--------|------|
| Q924M7 | Mannose-6-phosphate isomerase OS=Mus musculus GN=Mpi PE=2 SV=1 - [MPL_MOUSE]                                              | 34.99 | 2 | 8  | 8  | 23   | 1.11 | 0.88 | 0.80 | 0.96 | 0.89 | 0.70 | 0.61 | 0.66 | 0.63 | 0.69 | 0.63 | 0.74 | 0.66 | 46.54  | 5.95 |
| O08553 | Dihydropyrimidinase-related protein 2 OS=Mus musculus GN=Dpysl2 PE=1 SV=2 - [DPYL2_MOUSE]                                 | 79.02 | 1 | 38 | 43 | 1771 | 0.92 | 0.92 | 0.98 | 0.90 | 0.98 | 0.67 | 0.73 | 0.67 | 0.74 | 0.64 | 0.72 | 0.69 | 0.75 | 62.24  | 6.38 |
| Q922V4 | Pleiotropic regulator 1 OS=Mus musculus GN=Plrg1 PE=2 SV=1 - [PLRG1_MOUSE]                                                | 37.43 | 3 | 12 | 12 | 22   | 1.11 | 0.77 | 0.78 | 0.89 | 0.77 | 0.72 | 0.58 | 0.67 | 0.65 | 0.68 | 0.57 | 0.70 | 0.59 | 56.90  | 9.17 |
| P17183 | Gamma-enolase OS=Mus musculus GN=Eno2 PE=1 SV=2 [ENOG_MOUSE]                                                              | 79.95 | 4 | 23 | 30 | 1568 | 1.01 | 0.92 | 0.91 | 0.88 | 0.88 | 0.65 | 0.64 | 0.67 | 0.67 | 0.64 | 0.64 | 0.63 | 0.62 | 47.27  | 5.11 |
| Q9R0D8 | WD repeat-containing protein 54 OS=Mus musculus GN=Wdr54 PE=2 SV=1 - [WDR54_MOUSE]                                        | 42.22 | 2 | 7  | 7  | 26   | 1.09 | 0.97 | 0.95 | 0.82 | 0.78 | 0.61 | 0.55 | 0.67 | 0.58 | 0.65 | 0.60 | 0.78 | 0.72 | 35.59  | 6.21 |
| Q9CRB0 | Sorting nexin-24 OS=Mus musculus GN=Snx24 PE=2 SV=1 - [SNX24_MOUSE]                                                       | 5.33  | 1 | 1  | 1  | 1    | 0.77 | 0.98 | 1.27 | 1.06 | 1.38 | 0.97 | 1.25 | 0.67 | 0.86 | 1.07 | 1.39 | 0.94 | 1.22 | 19.64  | 7.01 |
| A2AWP7 | Rho guanine nucleotide exchange factor 10-like protein (Fragment) OS=Mus musculus GN=Arhgef10l PE=2 SV=1 - [A2AWP7_MOUSE] | 17.79 | 5 | 1  | 1  | 2    | 0.97 | 0.96 | 0.99 | 0.76 | 0.78 | 0.78 | 0.81 | 0.67 | 0.69 | 1.06 | 1.10 | 0.89 | 0.92 | 17.14  | 4.27 |
| D3YTT9 | ZZ-type zinc finger-containing protein 3 OS=Mus musculus GN=Zzz3 PE=2 SV=1 - [D3YTT9_MOUSE]                               | 1.76  | 2 | 1  | 1  | 2    | 1.00 | 0.80 | 1.08 | 0.67 | 0.91 | 1.18 | 1.18 | 0.67 | 0.90 | 0.91 | 1.24 | 0.93 | 0.93 | 102.14 | 5.86 |
| Q6GQT6 | Sterol regulatory element-binding protein cleavage-activating protein OS=Mus musculus GN=Scap PE=1 SV=1 - [SCAP_MOUSE]    | 1.88  | 1 | 2  | 2  | 2    | 0.86 | 1.40 | 1.63 | 1.03 | 1.19 | 0.96 | 1.11 | 0.67 | 0.77 | 0.56 | 0.65 | 0.59 | 0.69 | 139.52 | 7.08 |
| Q9CQ26 | STAM-binding protein OS=Mus musculus GN=Stabp PE=2 SV=1 - [STABP_MOUSE]                                                   | 6.84  | 1 | 2  | 2  | 3    | 0.66 | 0.64 | 0.97 | 0.93 | 1.40 | 0.66 | 1.00 | 0.67 | 1.01 | 0.69 | 1.05 | 0.87 | 1.32 | 48.48  | 6.64 |
| Q9CQJ4 | E3 ubiquitin-protein ligase RING2 OS=Mus musculus GN=Rnf2 PE=1 SV=1 - [RING2_MOUSE]                                       | 3.87  | 1 | 1  | 1  | 2    | 0.93 | 0.59 | 0.63 | 0.91 | 0.97 | 0.66 | 0.70 | 0.67 | 0.72 | 0.63 | 0.68 | 0.66 | 0.70 | 37.60  | 6.84 |
| Q9R1P0 | Proteasome subunit alpha type-4 OS=Mus musculus GN=Psm4 PE=1 SV=1 - [PSA4_MOUSE]                                          | 22.61 | 3 | 5  | 5  | 23   | 0.85 | 1.05 | 1.21 | 0.94 | 1.04 | 0.67 | 0.82 | 0.67 | 0.78 | 0.65 | 0.76 | 0.68 | 0.85 | 29.45  | 7.72 |

|        |                                                                                                                |       |   |    |    |     |      |      |      |      |      |      |      |      |      |      |      |      |      |        |       |
|--------|----------------------------------------------------------------------------------------------------------------|-------|---|----|----|-----|------|------|------|------|------|------|------|------|------|------|------|------|------|--------|-------|
| Q9CRC9 | Glucosamine-6-phosphate isomerase 2<br>OS=Mus musculus<br>GN=Cnpda2 PE=2<br>SV=1 -<br>[GNP12_MOUSE]            | 56.16 | 5 | 7  | 9  | 19  | 0.96 | 0.95 | 1.09 | 0.88 | 0.92 | 0.72 | 0.68 | 0.67 | 0.67 | 0.60 | 0.69 | 0.68 | 0.87 | 31.06  | 6.90  |
| Q64521 | Glycerol-3-phosphate dehydrogenase, mitochondrial<br>OS=Mus musculus<br>GN=Gpd2<br>PE=1 SV=2 -<br>[GPDM_MOUSE] | 71.25 | 2 | 43 | 43 | 148 | 1.07 | 1.01 | 0.94 | 1.02 | 0.94 | 0.70 | 0.67 | 0.67 | 0.65 | 0.69 | 0.67 | 0.70 | 0.70 | 80.90  | 6.61  |
| P11404 | Fatty acid-binding protein, heart<br>OS=Mus musculus<br>GN=Fabp3<br>PE=1 SV=5 -<br>[FABPH_MOUSE]               | 66.92 | 2 | 12 | 12 | 126 | 0.96 | 0.90 | 1.01 | 0.88 | 0.94 | 0.62 | 0.69 | 0.67 | 0.74 | 0.57 | 0.61 | 0.61 | 0.68 | 14.81  | 6.57  |
| Q9CQ10 | Charged multivesicular body protein 3<br>OS=Mus musculus<br>GN=Chmp3 PE=1<br>SV=3 -<br>[CHMP3_MOUSE]           | 25.00 | 1 | 3  | 3  | 10  | 1.11 | 0.72 | 0.70 | 0.85 | 0.85 | 0.88 | 0.80 | 0.67 | 0.72 | 0.91 | 0.73 | 0.99 | 0.80 | 25.20  | 5.06  |
| Q9Z2L6 | Multiple inositol polyphosphate phosphatase 1<br>OS=Mus musculus<br>GN=Minpp1 PE=1<br>SV=3 -<br>[MINP1_MOUSE]  | 17.67 | 1 | 6  | 6  | 9   | 0.98 | 1.12 | 1.18 | 0.95 | 1.01 | 0.72 | 0.73 | 0.67 | 0.72 | 0.77 | 0.75 | 0.84 | 0.85 | 54.50  | 7.49  |
| Q8BJD1 | Inter-alpha-trypsin inhibitor heavy chain H5<br>OS=Mus musculus<br>GN=Itih5 PE=2 SV=1 -<br>[ITIH5_MOUSE]       | 1.47  | 1 | 1  | 1  | 2   | 0.75 | 0.73 | 0.97 | 0.75 | 0.99 | 0.69 | 0.91 | 0.68 | 0.90 | 0.82 | 1.09 | 0.61 | 0.81 | 106.68 | 8.16  |
| P51855 | Glutathione synthetase<br>OS=Mus musculus<br>GN=Gss PE=2 SV=1 -<br>[GSHB_MOUSE]                                | 27.22 | 5 | 9  | 9  | 13  | 0.78 | 1.04 | 1.09 | 0.90 | 1.05 | 0.70 | 0.93 | 0.68 | 1.04 | 0.68 | 1.14 | 0.71 | 0.99 | 52.21  | 5.80  |
| D3YTP0 | Metalloreductase STEAP3 (Fragment)<br>OS=Mus musculus<br>GN=Steap3 PE=2<br>SV=1 -<br>[D3YTP0_MOUSE]            | 2.86  | 4 | 1  | 1  | 1   | 0.95 | 1.04 | 1.09 | 0.89 | 0.93 | 0.59 | 0.62 | 0.68 | 0.71 | 0.64 | 0.67 | 0.62 | 0.65 | 46.94  | 9.16  |
| P63325 | 40S ribosomal protein S10<br>OS=Mus musculus<br>GN=Rps10<br>PE=1 SV=1 -<br>[RS10_MOUSE]                        | 33.33 | 3 | 6  | 6  | 21  | 0.78 | 0.71 | 0.88 | 0.77 | 0.97 | 0.72 | 0.88 | 0.68 | 0.87 | 0.68 | 0.84 | 0.65 | 0.83 | 18.90  | 10.15 |
| Q9D6M3 | Mitochondrial glutamate carrier 1<br>OS=Mus musculus<br>GN=Slc25a22 PE=1<br>SV=1 -<br>[GHC1_MOUSE]             | 30.34 | 5 | 6  | 8  | 53  | 1.03 | 1.38 | 1.26 | 1.25 | 1.10 | 0.68 | 0.63 | 0.68 | 0.63 | 0.88 | 0.80 | 1.02 | 0.96 | 34.65  | 9.09  |
| P01837 | Ig kappa chain C region<br>OS=Mus musculus<br>PE=1 SV=1 -<br>[IGKC_MOUSE]                                      | 26.42 | 1 | 2  | 2  | 8   | 1.19 | 0.72 | 0.60 | 0.77 | 0.72 | 0.79 | 0.64 | 0.68 | 0.65 | 1.25 | 1.18 | 0.79 | 0.73 | 11.77  | 5.41  |
| Q7M6Z0 | Reticulon-4 receptor-like 2<br>OS=Mus musculus<br>GN=Rtn4rl2<br>PE=2 SV=1 -<br>[R4RL2_MOUSE]                   | 13.81 | 2 | 4  | 4  | 14  | 0.97 | 0.92 | 0.97 | 0.96 | 0.97 | 0.83 | 0.83 | 0.68 | 0.75 | 0.87 | 0.87 | 0.86 | 0.87 | 46.05  | 7.65  |

|        |                                                                                                                     |       |   |    |    |     |      |      |      |      |      |      |      |      |      |      |      |      |      |        |      |
|--------|---------------------------------------------------------------------------------------------------------------------|-------|---|----|----|-----|------|------|------|------|------|------|------|------|------|------|------|------|------|--------|------|
| G3XA35 | MCG116562, isoform CRA_a OS=Mus musculus GN=Vcan PE=4 SV=1 - [G3XA35_MOUSE]                                         | 11.53 | 7 | 1  | 22 | 293 | 0.82 | 0.58 | 0.70 | 0.71 | 0.87 | 0.73 | 0.89 | 0.68 | 0.83 | 0.58 | 0.71 | 0.73 | 0.89 | 262.55 | 4.65 |
| P12382 | 6-phosphofruktokinase, liver type OS=Mus musculus GN=Pfk1 PE=1 SV=4 - [K6PL_MOUSE]                                  | 32.56 | 1 | 16 | 21 | 110 | 1.01 | 1.05 | 1.06 | 1.03 | 1.01 | 0.64 | 0.62 | 0.68 | 0.66 | 0.65 | 0.65 | 0.75 | 0.72 | 85.31  | 7.17 |
| O88374 | Branched-chain-amino-acid aminotransferase OS=Mus musculus GN=Bcat2 PE=2 SV=1 - [O88374_MOUSE]                      | 10.20 | 4 | 3  | 3  | 3   | 0.96 | 0.80 | 1.07 | 1.28 | 1.01 | 0.67 | 0.54 | 0.68 | 0.71 | 0.55 | 0.58 | 0.61 | 0.82 | 39.75  | 7.68 |
| Q3UAW9 | Transcription factor IIB 50 kDa subunit OS=Mus musculus GN=Brf2 PE=2 SV=1 - [BRF2_MOUSE]                            | 5.00  | 1 | 1  | 1  | 1   | 1.15 | 0.78 | 0.68 | 0.93 | 0.81 | 0.82 | 0.71 | 0.68 | 0.59 | 0.84 | 0.74 | 0.70 | 0.61 | 47.02  | 7.27 |
| Q6IEE6 | Transmembrane protein 132E OS=Mus musculus GN=Tmem132e PE=2 SV=1 - [T132E_MOUSE]                                    | 3.05  | 1 | 2  | 2  | 3   | 1.32 | 1.15 | 0.87 | 1.00 | 0.75 | 0.83 | 0.62 | 0.68 | 0.51 | 1.04 | 0.79 | 0.91 | 0.69 | 106.92 | 6.04 |
| Q8K183 | Pyridoxal kinase OS=Mus musculus GN=Pdxk PE=1 SV=1 - [PDXK_MOUSE]                                                   | 49.68 | 2 | 14 | 14 | 79  | 0.90 | 0.92 | 1.11 | 1.06 | 1.16 | 0.73 | 0.80 | 0.68 | 0.80 | 0.77 | 0.87 | 0.81 | 0.89 | 34.99  | 6.29 |
| P62137 | Serine/threonine-protein phosphatase PP1-alpha catalytic subunit OS=Mus musculus GN=Ppp1ca PE=1 SV=1 - [PP1A_MOUSE] | 75.45 | 1 | 5  | 20 | 135 | 1.03 | 1.09 | 1.07 | 0.92 | 0.98 | 0.55 | 0.61 | 0.68 | 0.69 | 0.59 | 0.67 | 0.65 | 0.74 | 37.52  | 6.33 |
| G3X9A7 | MCG49978 OS=Mus musculus GN=Pcxd3 PE=4 SV=1 - [G3X9A7_MOUSE]                                                        | 8.41  | 2 | 2  | 2  | 6   | 1.37 | 0.74 | 0.54 | 1.07 | 0.95 | 0.87 | 0.70 | 0.68 | 0.50 | 1.09 | 0.94 | 1.04 | 0.94 | 36.29  | 6.46 |
| P07310 | Creatine kinase M-type OS=Mus musculus GN=Ckm PE=1 SV=1 - [KCRM_MOUSE]                                              | 37.01 | 1 | 9  | 10 | 25  | 0.65 | 0.46 | 0.75 | 0.74 | 1.15 | 5.86 | 9.18 | 0.68 | 1.04 | 0.63 | 1.02 | 0.73 | 1.16 | 43.02  | 7.06 |
| Q9Z2U1 | Proteasome subunit alpha type-5 OS=Mus musculus GN=Pma5 PE=1 SV=1 - [PSA5_MOUSE]                                    | 43.98 | 2 | 10 | 10 | 54  | 0.90 | 0.97 | 1.13 | 0.96 | 1.09 | 0.70 | 0.82 | 0.68 | 0.80 | 0.68 | 0.81 | 0.70 | 0.84 | 26.39  | 4.79 |
| K4D163 | Cellular repressor of E1A-stimulated genes 1, isoform CRA_a OS=Mus musculus GN=Creg1 PE=4 SV=1 - [K4D163_MOUSE]     | 11.70 | 2 | 1  | 1  | 1   | 0.99 | 0.73 | 0.73 | 0.78 | 0.79 | 0.55 | 0.55 | 0.68 | 0.69 | 0.58 | 0.58 | 0.60 | 0.60 | 11.01  | 8.03 |
| Q921H1 | Serotransferrin OS=Mus musculus GN=Tf PE=1 SV=1 - [TRFE_MOUSE]                                                      | 60.55 | 8 | 2  | 42 | 264 | 0.93 | 0.88 | 0.95 | 0.69 | 0.76 | 0.69 | 0.74 | 0.68 | 0.73 | 1.01 | 1.09 | 0.67 | 0.76 | 76.67  | 7.18 |

|          |                                                                                                                     |       |   |    |    |     |      |      |      |      |      |      |      |      |      |      |      |      |      |       |       |
|----------|---------------------------------------------------------------------------------------------------------------------|-------|---|----|----|-----|------|------|------|------|------|------|------|------|------|------|------|------|------|-------|-------|
| P21460   | Cystatin-C OS=Mus musculus GN=Cst3 PE=2 SV=2 - [CYTC_MOUSE]                                                         | 54.29 | 2 | 7  | 7  | 103 | 0.90 | 0.85 | 0.96 | 0.85 | 0.97 | 0.67 | 0.74 | 0.68 | 0.76 | 0.70 | 0.81 | 0.67 | 0.70 | 15.52 | 9.00  |
| Q9D023   | Mitochondrial pyruvate carrier 2 OS=Mus musculus GN=Mpc2 PE=1 SV=1 - [MPC2_MOUSE]                                   | 26.77 | 4 | 4  | 4  | 8   | 0.80 | 0.99 | 1.11 | 1.11 | 1.38 | 0.65 | 0.80 | 0.68 | 0.80 | 0.66 | 0.81 | 0.69 | 0.94 | 14.28 | 10.61 |
| O88967   | ATP-dependent zinc metalloprotease YME1L1 OS=Mus musculus GN=Yme1l1 PE=2 SV=1 - [YME1_MOUSE]                        | 1.54  | 1 | 1  | 1  | 2   | 1.10 | 1.16 | 1.05 | 1.29 | 1.17 | 0.69 | 0.62 | 0.68 | 0.62 | 0.87 | 0.79 | 0.77 | 0.70 | 79.98 | 8.97  |
| Q8VHK5   | Membrane protein MLC1 OS=Mus musculus GN=Mlc1 PE=2 SV=1 - [MLC1_MOUSE]                                              | 4.97  | 2 | 2  | 2  | 4   | 0.92 | 1.11 | 1.21 | 0.93 | 1.01 | 0.61 | 0.66 | 0.68 | 0.74 | 0.76 | 0.83 | 0.72 | 0.78 | 41.57 | 7.90  |
| Q99JR1   | Sideroflexin-1 OS=Mus musculus GN=Sfxn1 PE=1 SV=3 - [SFXN1_MOUSE]                                                   | 31.06 | 1 | 5  | 7  | 22  | 1.04 | 1.48 | 1.43 | 1.17 | 1.10 | 0.65 | 0.63 | 0.68 | 0.71 | 0.90 | 0.84 | 0.94 | 0.93 | 35.63 | 9.23  |
| Q8BM13   | Noelin-2 OS=Mus musculus GN=Olfn2 PE=1 SV=2 - [NOE2_MOUSE]                                                          | 16.52 | 1 | 7  | 7  | 10  | 0.97 | 0.88 | 0.85 | 1.00 | 1.07 | 0.69 | 0.64 | 0.69 | 0.65 | 0.62 | 0.65 | 0.67 | 0.69 | 50.69 | 8.51  |
| P61329-2 | Isoform 2 of Fibroblast growth factor 12 OS=Mus musculus GN=Fgf12 - [FGF12_MOUSE]                                   | 22.65 | 2 | 3  | 3  | 4   | 1.01 | 0.77 | 0.89 | 0.88 | 0.84 | 0.69 | 0.74 | 0.69 | 0.66 | 0.70 | 0.65 | 0.71 | 0.66 | 20.41 | 8.87  |
| Q8C4U8   | EGF-like repeat and discoidin I-like domain-containing protein 3 OS=Mus musculus GN=Edi3 PE=2 SV=1 - [Q8C4U8_MOUSE] | 14.04 | 3 | 6  | 6  | 11  | 1.03 | 0.98 | 1.00 | 0.95 | 0.93 | 0.70 | 0.73 | 0.69 | 0.73 | 0.66 | 0.64 | 0.80 | 0.79 | 52.66 | 7.80  |
| Q9Z2U0   | Proteasome subunit alpha type-7 OS=Mus musculus GN=Psm7 PE=1 SV=1 - [PSA7_MOUSE]                                    | 52.42 | 2 | 11 | 11 | 47  | 0.90 | 0.93 | 1.07 | 0.98 | 1.09 | 0.67 | 0.72 | 0.69 | 0.75 | 0.65 | 0.76 | 0.70 | 0.77 | 27.84 | 8.46  |
| O08749   | Dihydropyridyl dehydrogenase, mitochondrial OS=Mus musculus GN=Dld PE=1 SV=2 - [DLDH_MOUSE]                         | 66.21 | 1 | 21 | 21 | 221 | 1.07 | 0.90 | 0.85 | 0.82 | 0.78 | 0.70 | 0.67 | 0.69 | 0.66 | 0.68 | 0.64 | 0.82 | 0.78 | 54.24 | 7.90  |
| Q9CQW2   | ADP-ribosylation factor-like protein 8B OS=Mus musculus GN=Arf8b PE=2 SV=1 - [ARL8B_MOUSE]                          | 38.71 | 1 | 2  | 6  | 19  | 1.13 | 0.92 | 0.81 | 1.05 | 0.93 | 0.68 | 0.59 | 0.69 | 0.61 | 0.72 | 0.64 | 0.75 | 0.67 | 21.53 | 8.43  |
| P21614   | Vitamin D-binding protein OS=Mus musculus GN=Gc PE=1 SV=2 - [VTDB_MOUSE]                                            | 4.20  | 1 | 1  | 1  | 2   | 0.86 | 1.09 | 1.27 | 0.66 | 0.77 | 0.54 | 0.62 | 0.69 | 0.80 | 0.76 | 0.88 | 0.73 | 0.85 | 53.56 | 5.50  |

|          |                                                                                                                                    |       |   |    |    |    |      |      |      |      |      |      |      |      |      |      |      |      |      |        |      |
|----------|------------------------------------------------------------------------------------------------------------------------------------|-------|---|----|----|----|------|------|------|------|------|------|------|------|------|------|------|------|------|--------|------|
| Q3UPV6   | Voltage-gated potassium channel subunit beta-2<br>OS=Mus musculus<br>GN=Kcnab2 PE=2<br>SV=1 -<br>[Q3UPV6_MOUSE]                    | 49.01 | 5 | 12 | 14 | 69 | 0.96 | 1.08 | 1.05 | 1.00 | 1.07 | 0.70 | 0.75 | 0.69 | 0.71 | 0.69 | 0.73 | 0.71 | 0.75 | 39.28  | 8.63 |
| E9Q4V9   | Nuclear pore complex protein Nup107<br>OS=Mus musculus<br>GN=Nup107 PE=2<br>SV=1 -<br>[E9Q4V9_MOUSE]                               | 2.49  | 2 | 2  | 2  | 4  | 0.72 | 1.08 | 1.49 | 0.78 | 1.07 | 0.72 | 0.99 | 0.69 | 0.95 | 0.67 | 0.92 | 0.69 | 0.96 | 106.44 | 5.43 |
| O70370   | Cathepsin S OS=Mus musculus<br>GN=Ctss PE=2 SV=2 -<br>[CATS_MOUSE]                                                                 | 14.71 | 2 | 4  | 4  | 8  | 1.06 | 0.88 | 0.87 | 0.90 | 0.87 | 0.74 | 0.68 | 0.69 | 0.54 | 0.67 | 0.62 | 0.63 | 0.63 | 38.45  | 6.96 |
| Q921W2   | Nucleolysin TIAR<br>OS=Mus musculus<br>GN=Tial1 PE=2 SV=1<br>[Q921W2_MOUSE]                                                        | 19.73 | 4 | 4  | 7  | 13 | 0.89 | 0.74 | 0.92 | 0.91 | 1.08 | 0.67 | 0.79 | 0.69 | 0.87 | 0.67 | 0.79 | 0.73 | 0.86 | 41.50  | 7.74 |
| Q93092   | Transaldolase OS=Mus musculus<br>GN=Taldo1 PE=1 SV=2 -<br>[TALDO_MOUSE]                                                            | 38.28 | 1 | 15 | 15 | 46 | 0.94 | 0.87 | 1.00 | 0.92 | 0.99 | 0.71 | 0.79 | 0.69 | 0.73 | 0.72 | 0.78 | 0.70 | 0.77 | 37.36  | 7.03 |
| Q99KC8   | von Willebrand factor A domain-containing protein 5A OS=Mus musculus<br>GN=Vwa5a PE=1 SV=2 -<br>[VMA5A_MOUSE]                      | 13.87 | 4 | 9  | 9  | 19 | 1.01 | 0.92 | 0.94 | 0.85 | 0.92 | 0.67 | 0.65 | 0.69 | 0.70 | 0.70 | 0.69 | 0.70 | 0.68 | 87.09  | 6.58 |
| Q8CIF4   | Biotinidase OS=Mus musculus<br>GN=Btd PE=1 SV=2 -<br>[BTD_MOUSE]                                                                   | 4.23  | 1 | 1  | 2  | 3  | 0.90 | 1.12 | 1.24 | 0.99 | 1.10 | 0.72 | 0.80 | 0.69 | 0.76 | 0.73 | 0.81 | 0.71 | 0.79 | 58.12  | 5.80 |
| G3UYE9   | Killer cell lectin-like receptor subfamily B member 1C (Fragment)<br>OS=Mus musculus<br>GN=Klrb1c PE=2<br>SV=1 -<br>[G3UYE9_MOUSE] | 23.85 | 1 | 1  | 1  | 1  | 0.87 | 0.94 | 1.08 | 0.65 | 0.75 | 0.92 | 1.05 | 0.69 | 0.79 | 0.86 | 0.99 | 0.81 | 0.93 | 11.68  | 8.44 |
| P42227-2 | Isoform Stat3B of Signal transducer and activator of transcription 3<br>OS=Mus musculus<br>GN=Stat3 -<br>[STAT3_MOUSE]             | 1.94  | 4 | 1  | 1  | 2  | 0.92 | 0.94 | 1.03 | 0.98 | 1.07 | 0.78 | 0.84 | 0.69 | 0.75 | 0.75 | 0.82 | 0.72 | 0.79 | 83.07  | 7.12 |
| Q8BGA9   | Mitochondrial inner membrane protein OXA1L OS=Mus musculus<br>GN=Oxa11 PE=2 SV=1 -<br>[OXA1L_MOUSE]                                | 2.08  | 1 | 1  | 1  | 2  | 0.85 | 1.38 | 1.61 | 0.90 | 1.06 | 0.70 | 0.81 | 0.69 | 0.81 | 0.84 | 0.99 | 0.90 | 1.06 | 48.19  | 9.61 |
| Q9CZP7-2 | Isoform 2 of Hsp90 co-chaperone Cdc37-like 1<br>OS=Mus musculus<br>GN=Cdc37l1 -<br>[CD37L_MOUSE]                                   | 2.93  | 4 | 1  | 1  | 3  | 0.78 | 0.61 | 0.78 | 0.79 | 1.01 | 0.66 | 0.84 | 0.69 | 0.88 | 0.64 | 0.82 | 0.61 | 0.78 | 35.38  | 5.92 |
| P41539-2 | Isoform Gamma of Protachykinin-1<br>OS=Mus musculus<br>GN=Tac1 -<br>[TKN1_MOUSE]                                                   | 11.30 | 2 | 1  | 1  | 4  | 0.62 | 0.47 | 0.76 | 0.57 | 0.92 | 0.76 | 1.22 | 0.69 | 1.11 | 0.75 | 1.21 | 0.74 | 1.19 | 13.39  | 9.35 |

|        |                                                                                                                  |       |   |    |    |     |      |      |      |      |      |      |      |      |      |      |      |      |      |       |      |
|--------|------------------------------------------------------------------------------------------------------------------|-------|---|----|----|-----|------|------|------|------|------|------|------|------|------|------|------|------|------|-------|------|
| P25785 | Metalloproteinase inhibitor 2 OS=Mus musculus GN=Timp2 PE=1 SV=2 - [TIMP2_MOUSE]                                 | 16.82 | 3 | 5  | 5  | 6   | 1.02 | 0.78 | 0.98 | 0.88 | 0.77 | 0.70 | 0.66 | 0.69 | 0.67 | 0.74 | 0.83 | 0.81 | 0.75 | 24.31 | 7.49 |
| P61922 | 4-aminobutyrate aminotransferase, mitochondrial OS=Mus musculus GN=Abat PE=1 SV=1 - [GABT_MOUSE]                 | 70.60 | 5 | 26 | 26 | 136 | 0.99 | 1.05 | 1.05 | 1.05 | 1.08 | 0.76 | 0.75 | 0.69 | 0.73 | 0.84 | 0.84 | 0.86 | 0.88 | 56.42 | 8.09 |
| Q99JW2 | Aminoacylase-1 OS=Mus musculus GN=Acy1 PE=1 SV=1 - [ACY1_MOUSE]                                                  | 31.37 | 1 | 10 | 10 | 23  | 1.02 | 1.03 | 0.95 | 1.03 | 1.07 | 0.67 | 0.68 | 0.69 | 0.78 | 0.80 | 0.75 | 0.76 | 0.76 | 45.75 | 6.32 |
| Q8CIH9 | Amidophosphoribosyltransferase OS=Mus musculus GN=Ppat PE=2 SV=1 - [Q8CIH9_MOUSE]                                | 11.99 | 1 | 5  | 5  | 11  | 0.91 | 1.14 | 1.23 | 0.93 | 1.04 | 0.72 | 1.00 | 0.69 | 0.75 | 0.66 | 0.68 | 0.77 | 0.91 | 57.37 | 6.96 |
| P35700 | Peroxisome oxidin-1 OS=Mus musculus GN=Prdx1 PE=1 SV=1 - [PRDX1_MOUSE]                                           | 88.44 | 4 | 14 | 16 | 162 | 1.02 | 0.83 | 0.83 | 0.91 | 0.90 | 0.64 | 0.64 | 0.69 | 0.67 | 0.64 | 0.62 | 0.62 | 0.63 | 22.16 | 8.12 |
| Q8BW96 | Isoform 2 of Calcium/calmodulin-dependent protein kinase type 1D OS=Mus musculus GN=Camk1d - [KCC1D_MOUSE]       | 41.71 | 2 | 9  | 12 | 40  | 0.97 | 0.77 | 0.79 | 0.93 | 0.90 | 0.70 | 0.67 | 0.69 | 0.69 | 0.64 | 0.63 | 0.63 | 0.60 | 41.08 | 6.74 |
| P40237 | CD82 antigen OS=Mus musculus GN=Cd82 PE=1 SV=1 - [CD82_MOUSE]                                                    | 16.17 | 3 | 4  | 4  | 22  | 0.98 | 0.81 | 0.81 | 1.05 | 1.02 | 0.70 | 0.76 | 0.69 | 0.70 | 0.73 | 0.77 | 0.70 | 0.76 | 29.61 | 5.02 |
| Q8R164 | Valacyclovir hydrolase OS=Mus musculus GN=Bphl PE=2 SV=1 - [BPHL_MOUSE]                                          | 39.52 | 1 | 9  | 9  | 18  | 0.76 | 1.06 | 1.20 | 1.08 | 1.38 | 0.66 | 0.88 | 0.69 | 0.86 | 0.72 | 0.90 | 0.76 | 0.92 | 32.83 | 8.94 |
| Q8BH82 | N-acyl-phosphatidylethanolamine-hydrolyzing phospholipase D OS=Mus musculus GN=Napepld PE=1 SV=1 - [NAPEP_MOUSE] | 6.57  | 1 | 2  | 2  | 2   | 1.05 | 0.73 | 0.70 | 1.02 | 0.97 | 0.85 | 0.80 | 0.69 | 0.66 | 0.83 | 0.79 | 1.00 | 0.95 | 45.79 | 5.94 |
| P22315 | Ferrochelatase, mitochondrial OS=Mus musculus GN=Fech PE=1 SV=2 - [HEMH_MOUSE]                                   | 33.57 | 2 | 10 | 10 | 32  | 1.00 | 0.87 | 0.88 | 0.90 | 0.96 | 0.74 | 0.74 | 0.69 | 0.71 | 0.72 | 0.70 | 0.67 | 0.73 | 47.10 | 8.91 |
| Q32MT6 | Prestin OS=Mus musculus GN=Slc26a5 PE=2 SV=1 - [Q32MT6_MOUSE]                                                    | 0.85  | 3 | 1  | 1  | 1   | 1.07 | 1.00 | 0.92 | 1.32 | 1.23 | 0.58 | 0.54 | 0.69 | 0.64 | 1.08 | 1.01 | 0.51 | 0.47 | 77.23 | 5.80 |
| Q9EPB4 | Apoptosis-associated speck-like protein containing a CARD OS=Mus musculus GN=Pycard PE=1 SV=1 - [ASC_MOUSE]      | 45.08 | 1 | 5  | 5  | 9   | 1.03 | 0.94 | 0.92 | 0.89 | 0.90 | 0.71 | 0.65 | 0.70 | 0.73 | 0.70 | 0.64 | 0.78 | 0.76 | 21.45 | 5.43 |

|        |                                                                                                                              |       |    |    |    |     |      |      |      |      |      |      |      |      |      |      |      |      |      |        |      |
|--------|------------------------------------------------------------------------------------------------------------------------------|-------|----|----|----|-----|------|------|------|------|------|------|------|------|------|------|------|------|------|--------|------|
| P61982 | 14-3-3 protein gamma OS=Mus musculus GN=Ywhag PE=1 SV=2 - [1433G_MOUSE]                                                      | 85.02 | 3  | 17 | 25 | 631 | 0.95 | 0.92 | 0.96 | 0.94 | 0.99 | 0.69 | 0.75 | 0.70 | 0.77 | 0.68 | 0.74 | 0.70 | 0.75 | 28.28  | 4.89 |
| Q8BGN3 | Ectonucleotide pyrophosphatase/phosphodiesterase family member 6 OS=Mus musculus GN=Enpp6 PE=2 SV=1 - [ENPP6_MOUSE]          | 35.00 | 3  | 13 | 13 | 54  | 0.95 | 0.94 | 1.08 | 0.87 | 0.96 | 0.67 | 0.73 | 0.70 | 0.76 | 0.69 | 0.75 | 0.84 | 0.91 | 50.59  | 7.31 |
| P57716 | Nicestrin OS=Mus musculus GN=Nestn PE=1 SV=3 - [NICA_MOUSE]                                                                  | 11.44 | 1  | 6  | 6  | 10  | 0.93 | 0.97 | 1.04 | 0.88 | 0.98 | 0.71 | 0.83 | 0.70 | 0.76 | 0.71 | 0.80 | 0.83 | 0.92 | 78.44  | 6.09 |
| O35425 | Bcl-2-related ovarian killer protein OS=Mus musculus GN=Bok PE=1 SV=1 - [BOK_MOUSE]                                          | 4.69  | 1  | 1  | 1  | 1   | 0.73 | 1.09 | 1.49 | 1.18 | 1.62 | 0.80 | 1.09 | 0.70 | 0.96 | 0.70 | 0.96 | 1.09 | 1.50 | 23.44  | 9.11 |
| Q5TCH7 | Cullin-4A OS=Mus musculus GN=Cul4a PE=1 SV=1 - [CUL4A_MOUSE]                                                                 | 7.64  | 3  | 3  | 7  | 10  | 0.83 | 0.94 | 1.18 | 1.17 | 1.28 | 0.91 | 1.00 | 0.70 | 0.87 | 0.81 | 1.02 | 0.98 | 1.17 | 87.70  | 8.35 |
| A2A191 | Phosphorylase b kinase regulatory subunit alpha, skeletal muscle isoform OS=Mus musculus GN=Phka1 PE=2 SV=1 - [A2A191_MOUSE] | 1.52  | 6  | 2  | 2  | 3   | 0.93 | 1.05 | 1.12 | 0.92 | 0.99 | 0.78 | 0.83 | 0.70 | 0.74 | 0.85 | 0.91 | 0.88 | 0.95 | 132.23 | 5.54 |
| Q3TCR7 | Dynamin-2 OS=Mus musculus GN=Dnm2 PE=2 SV=1 - [Q3TCR7_MOUSE]                                                                 | 21.52 | 15 | 2  | 22 | 79  | 1.03 | 1.25 | 1.21 | 1.19 | 1.24 | 0.69 | 0.67 | 0.70 | 0.73 | 0.78 | 0.82 | 0.88 | 0.92 | 97.93  | 7.44 |
| Q8CGK7 | Guanine nucleotide-binding protein G(olf) subunit alpha OS=Mus musculus GN=Gnal PE=1 SV=1 - [GNAL_MOUSE]                     | 20.73 | 6  | 4  | 6  | 37  | 1.11 | 1.54 | 1.18 | 1.53 | 1.56 | 1.13 | 0.92 | 0.70 | 0.56 | 1.30 | 1.20 | 2.07 | 1.78 | 44.28  | 6.65 |
| Q8R4V2 | Dual specificity protein phosphatase 15 OS=Mus musculus GN=Dusp15 PE=2 SV=3 - [DUS15_MOUSE]                                  | 5.53  | 1  | 1  | 1  | 1   | 0.96 | 1.01 | 1.05 | 0.89 | 0.92 | 0.77 | 0.79 | 0.70 | 0.72 | 0.61 | 0.64 | 0.67 | 0.70 | 26.17  | 9.26 |
| Q920A5 | Retinoid-inducible serine carboxypeptidase OS=Mus musculus GN=Scepl1 PE=2 SV=2 - [RISC_MOUSE]                                | 3.10  | 1  | 1  | 1  | 3   | 0.99 | 0.89 | 0.75 | 0.98 | 0.83 | 0.87 | 0.73 | 0.70 | 0.59 | 0.84 | 0.85 | 1.23 | 1.24 | 50.93  | 5.66 |
| P62835 | Ras-related protein Rap1A OS=Mus musculus GN=Rap1a PE=2 SV=1 - [RAPIA_MOUSE]                                                 | 57.07 | 1  | 3  | 9  | 50  | 0.94 | 1.03 | 1.00 | 0.94 | 0.95 | 0.87 | 0.87 | 0.70 | 0.74 | 0.77 | 0.82 | 0.77 | 0.80 | 20.97  | 6.67 |
| Q9ER73 | Elongator complex protein 4 OS=Mus musculus GN=Elp4 PE=2 SV=2 - [ELP4_MOUSE]                                                 | 7.82  | 2  | 2  | 2  | 3   | 0.96 | 1.05 | 1.10 | 0.94 | 0.98 | 0.74 | 0.77 | 0.70 | 0.73 | 0.76 | 0.80 | 0.88 | 0.92 | 46.30  | 8.78 |



|        |                                                                                                                                                                       |       |   |    |    |     |      |      |      |      |      |      |      |      |      |      |      |      |      |        |      |
|--------|-----------------------------------------------------------------------------------------------------------------------------------------------------------------------|-------|---|----|----|-----|------|------|------|------|------|------|------|------|------|------|------|------|------|--------|------|
| E9Q555 | E3 ubiquitin-protein ligase RNF213<br>OS=Mus musculus<br>GN=Rnf213 PE=2<br>SV=1 -<br>[RN213_MOUSE]                                                                    | 0.78  | 2 | 1  | 4  | 4   | 1.07 | 1.05 | 0.98 | 1.08 | 1.00 | 0.71 | 0.66 | 0.70 | 0.65 | 0.87 | 0.81 | 0.70 | 0.66 | 584.13 | 6.77 |
| Q9D1X8 | Tetraspanin 2, isoform CRA_b OS=Mus musculus GN=Tspan2 PE=2 SV=1 -<br>[Q9D1X8_MOUSE]                                                                                  | 12.44 | 2 | 2  | 2  | 13  | 1.14 | 1.49 | 1.14 | 1.08 | 0.91 | 0.71 | 0.67 | 0.70 | 0.71 | 0.81 | 0.79 | 0.75 | 0.68 | 23.43  | 8.00 |
| F6UP77 | Putative N-acetylglucosamine-6-phosphate deacetylase (Fragment) OS=Mus musculus GN=Amdhd2 PE=2 SV=1 -<br>[F6UP77_MOUSE]                                               | 6.73  | 2 | 1  | 1  | 2   | 1.05 | 1.02 | 0.97 | 0.95 | 0.90 | 0.80 | 0.76 | 0.70 | 0.67 | 0.73 | 0.69 | 0.88 | 0.84 | 22.20  | 7.02 |
| P63330 | Serine/threonine-protein phosphatase 2A catalytic subunit alpha isoform OS=Mus musculus GN=Ppp2ca PE=1 SV=1 -<br>[PP2AA_MOUSE]                                        | 61.17 | 1 | 1  | 14 | 170 | 0.84 | 0.77 | 0.93 | 0.94 | 1.12 | 0.74 | 0.87 | 0.70 | 0.79 | 0.70 | 0.92 | 0.79 | 0.99 | 35.59  | 5.54 |
| Q62361 | Pro-thyrotropin-releasing hormone OS=Mus musculus GN=Trh PE=2 SV=2 -<br>[TRH_MOUSE]                                                                                   | 13.28 | 1 | 2  | 2  | 2   | 1.89 | 1.44 | 0.76 | 0.94 | 0.50 | 1.16 | 0.61 | 0.70 | 0.37 | 2.34 | 1.24 | 1.76 | 0.94 | 29.18  | 5.88 |
| Q4FJZ2 | Importin subunit alpha OS=Mus musculus GN=Kpna6 PE=2 SV=1 -<br>[Q4FJZ2_MOUSE]                                                                                         | 14.63 | 3 | 2  | 5  | 8   | 1.01 | 0.84 | 0.84 | 0.90 | 0.83 | 0.61 | 0.66 | 0.70 | 0.70 | 0.69 | 0.68 | 0.78 | 0.79 | 59.57  | 4.98 |
| Q9D2G2 | Dihydropyridyllysine-residue succinyltransferase component of 2-oxoglutarate dehydrogenase complex, mitochondrial OS=Mus musculus GN=Dlst PE=1 SV=1 -<br>[ODO2_MOUSE] | 42.07 | 2 | 15 | 15 | 526 | 1.01 | 0.84 | 0.85 | 0.87 | 0.86 | 0.65 | 0.64 | 0.70 | 0.69 | 0.70 | 0.69 | 0.61 | 0.62 | 48.96  | 8.95 |
| Q4FCQ7 | Arginyl-tRNA--protein transferase 1 OS=Mus musculus GN=Ate1 PE=2 SV=1 -<br>[Q4FCQ7_MOUSE]                                                                             | 11.59 | 4 | 4  | 4  | 6   | 1.12 | 0.82 | 0.84 | 1.09 | 1.03 | 0.83 | 0.77 | 0.70 | 0.71 | 0.78 | 0.80 | 0.90 | 0.92 | 58.28  | 8.16 |
| Q3V360 | Receptor-type tyrosine-protein phosphatase U OS=Mus musculus GN=Ptpn1 PE=2 SV=1 -<br>[Q3V360_MOUSE]                                                                   | 1.87  | 3 | 1  | 1  | 2   | 0.73 | 0.98 | 1.34 | 0.72 | 0.98 | 0.65 | 0.88 | 0.70 | 0.96 | 0.67 | 0.92 | 0.64 | 0.87 | 100.88 | 8.56 |
| Q9R1P4 | Proteasome subunit alpha type-1 OS=Mus musculus GN=Psm1 PE=1 SV=1 -<br>[PSA1_MOUSE]                                                                                   | 40.68 | 1 | 9  | 9  | 48  | 0.85 | 1.11 | 1.43 | 0.99 | 1.20 | 0.73 | 0.83 | 0.70 | 0.90 | 0.70 | 0.91 | 0.77 | 0.92 | 29.53  | 6.46 |

|        |                                                                                                                                                                     |       |   |    |    |     |      |      |      |      |      |      |      |      |      |      |      |      |      |        |      |
|--------|---------------------------------------------------------------------------------------------------------------------------------------------------------------------|-------|---|----|----|-----|------|------|------|------|------|------|------|------|------|------|------|------|------|--------|------|
| P62254 | Ubiquitin-conjugating enzyme E2 G1<br>OS=Mus musculus<br>GN=Ube2g1 PE=2<br>SV=3 -<br>[UB2G1_MOUSE]                                                                  | 14.71 | 1 | 2  | 2  | 2   | 1.09 | 0.92 | 0.84 | 0.80 | 0.74 | 0.80 | 0.73 | 0.70 | 0.65 | 0.65 | 0.60 | 0.92 | 0.84 | 19.50  | 5.30 |
| P53395 | Lipoamide acyltransferase component of branched-chain alpha-keto acid dehydrogenase complex, mitochondrial<br>OS=Mus musculus<br>GN=Dbt PE=2 SV=2 -<br>[ODB2_MOUSE] | 20.75 | 1 | 10 | 10 | 19  | 0.97 | 0.80 | 0.74 | 0.93 | 0.92 | 0.69 | 0.70 | 0.70 | 0.75 | 0.67 | 0.73 | 0.75 | 0.77 | 53.21  | 8.60 |
| Q9D1H7 | Isoform 2 of Golgi to ER traffic protein 4 homolog<br>OS=Mus musculus<br>GN=Get4 -<br>[GET4_MOUSE]                                                                  | 4.01  | 2 | 1  | 1  | 1   | 0.77 | 0.97 | 1.25 | 0.94 | 1.21 | 0.93 | 1.20 | 0.71 | 0.91 | 1.17 | 1.51 | 0.88 | 1.14 | 30.54  | 4.98 |
| Q5DTY9 | BTB/POZ domain-containing protein<br>KCTD16<br>OS=Mus musculus<br>GN=Kctd16<br>PE=1 SV=2 -<br>[KCTD16_MOUSE]                                                        | 29.04 | 1 | 11 | 12 | 32  | 0.95 | 0.95 | 1.01 | 0.99 | 1.04 | 0.75 | 0.77 | 0.71 | 0.74 | 0.70 | 0.74 | 0.69 | 0.75 | 48.94  | 8.19 |
| P16460 | Argininosuccinate synthase<br>OS=Mus musculus<br>GN=Ass1<br>PE=1 SV=1 -<br>[ASSY_MOUSE]                                                                             | 26.94 | 2 | 9  | 9  | 16  | 1.20 | 0.91 | 0.68 | 1.10 | 0.92 | 0.84 | 0.65 | 0.71 | 0.63 | 0.97 | 0.85 | 1.06 | 0.86 | 46.56  | 8.22 |
| Q07113 | Cation-independent mannose-6-phosphate receptor<br>OS=Mus musculus<br>GN=Igf2r<br>PE=1 SV=1 -<br>[MPRI_MOUSE]                                                       | 0.52  | 1 | 1  | 1  | 1   | 0.87 | 0.63 | 0.72 | 0.81 | 0.94 | 0.67 | 0.77 | 0.71 | 0.81 | 0.65 | 0.76 | 0.63 | 0.73 | 273.64 | 5.71 |
| E9Q800 | Mitochondrial inner membrane protein<br>OS=Mus musculus<br>GN=Immt PE=2 SV=1 -<br>[E9Q800_MOUSE]                                                                    | 59.06 | 2 | 1  | 35 | 117 | 0.88 | 0.61 | 0.69 | 1.15 | 1.31 | 0.85 | 0.96 | 0.71 | 0.80 | 0.79 | 0.89 | 1.01 | 1.15 | 75.55  | 7.80 |
| Q92511 | ATPase family AAA domain-containing protein 3<br>OS=Mus musculus<br>GN=Atad3<br>PE=1 SV=1 -<br>[ATAD3_MOUSE]                                                        | 15.06 | 5 | 7  | 7  | 11  | 1.00 | 1.28 | 1.22 | 1.21 | 1.18 | 0.69 | 0.67 | 0.71 | 0.72 | 0.76 | 0.77 | 0.88 | 0.90 | 66.70  | 9.29 |
| E9PZ69 | Transmembrane 9 superfamily member 2<br>OS=Mus musculus<br>GN=Tm9sf2 PE=2<br>SV=1 -<br>[E9PZ69_MOUSE]                                                               | 6.84  | 2 | 3  | 3  | 5   | 1.09 | 1.07 | 1.16 | 1.18 | 1.23 | 0.75 | 0.63 | 0.71 | 0.67 | 0.79 | 0.93 | 0.81 | 0.81 | 56.28  | 7.58 |
| Q8K1L0 | Isoform 2 of Cyclic AMP-responsive element-binding protein 5<br>OS=Mus musculus<br>GN=Creb5 -<br>[CREB5_MOUSE]                                                      | 12.86 | 1 | 1  | 1  | 1   | 0.58 | 0.79 | 1.35 | 0.58 | 1.00 | 0.61 | 1.05 | 0.71 | 1.22 | 0.66 | 1.14 | 0.86 | 1.49 | 26.53  | 7.59 |

|        |                                                                                                                                                       |       |   |    |    |     |      |      |      |      |      |      |      |      |      |      |      |      |      |        |      |
|--------|-------------------------------------------------------------------------------------------------------------------------------------------------------|-------|---|----|----|-----|------|------|------|------|------|------|------|------|------|------|------|------|------|--------|------|
| Q9D7X1 | BTB/POZ domain-containing protein KCTD4 OS=Mus musculus GN=Kctd4 PE=2 SV=1 - [KCTD4_MOUSE]                                                            | 17.76 | 1 | 4  | 4  | 7   | 1.12 | 1.24 | 1.06 | 0.94 | 0.77 | 0.91 | 0.82 | 0.71 | 0.63 | 0.93 | 0.84 | 0.92 | 0.72 | 29.96  | 7.06 |
| P99026 | Proteasome subunit beta type-4 OS=Mus musculus GN=Psmb4 PE=1 SV=1 - [PSB4_MOUSE]                                                                      | 42.80 | 1 | 8  | 8  | 29  | 0.80 | 1.10 | 1.36 | 1.01 | 1.19 | 0.71 | 0.88 | 0.71 | 0.86 | 0.64 | 0.79 | 0.72 | 0.88 | 29.10  | 5.64 |
| D3YWD1 | Protein Col6a3 (Fragment) OS=Mus musculus GN=Col6a3 PE=4 SV=2 - [D3YWD1_MOUSE]                                                                        | 0.76  | 3 | 1  | 1  | 1   | 1.07 | 0.72 | 0.67 | 0.76 | 0.71 | 0.99 | 0.92 | 0.71 | 0.66 | 1.10 | 1.03 | 1.08 | 1.01 | 185.62 | 5.53 |
| Q3URE9 | Leucine-rich repeat and immunoglobulin-like domain-containing nogo receptor-interacting protein 2 OS=Mus musculus GN=Lingo2 PE=2 SV=1 - [LIGO2_MOUSE] | 2.15  | 1 | 1  | 1  | 1   | 0.89 | 0.77 | 0.87 | 0.86 | 0.97 | 0.87 | 0.97 | 0.71 | 0.80 | 1.27 | 1.43 | 1.16 | 1.31 | 68.03  | 8.13 |
| Q8JZW4 | Copine-5 OS=Mus musculus GN=Cpne5 PE=2 SV=1 - [CPNES_MOUSE]                                                                                           | 29.51 | 2 | 3  | 14 | 36  | 0.99 | 0.90 | 0.89 | 1.07 | 1.15 | 0.87 | 0.88 | 0.71 | 0.80 | 0.87 | 0.95 | 0.88 | 0.89 | 65.55  | 5.77 |
| Q8C0M9 | Isoaspartyl peptidase/L-asparaginase OS=Mus musculus GN=Asrg1 PE=1 SV=1 - [ASGL1_MOUSE]                                                               | 58.90 | 1 | 17 | 17 | 100 | 1.05 | 0.81 | 0.76 | 0.90 | 0.85 | 0.69 | 0.64 | 0.71 | 0.66 | 0.69 | 0.66 | 0.76 | 0.72 | 33.93  | 7.65 |
| P51910 | Apolipoprotein D OS=Mus musculus GN=Apod PE=2 SV=1 - [APOD_MOUSE]                                                                                     | 23.28 | 1 | 4  | 4  | 12  | 0.90 | 0.95 | 1.04 | 0.92 | 1.04 | 0.65 | 0.68 | 0.71 | 0.70 | 0.56 | 0.63 | 0.56 | 0.65 | 21.52  | 4.91 |
| E0CZ78 | Serine/threonine-protein phosphatase OS=Mus musculus GN=Ppp3cb PE=2 SV=1 - [E0CZ78_MOUSE]                                                             | 38.55 | 6 | 8  | 17 | 180 | 0.95 | 1.08 | 1.15 | 0.97 | 1.04 | 0.73 | 0.78 | 0.72 | 0.75 | 0.71 | 0.73 | 0.76 | 0.81 | 59.04  | 5.91 |
| Q3TC72 | Fumarylacetoacetate hydrolase domain-containing protein 2A OS=Mus musculus GN=Fahd2 PE=1 SV=1 - [FAHD2_MOUSE]                                         | 37.38 | 1 | 8  | 8  | 20  | 0.99 | 0.93 | 0.94 | 1.06 | 1.05 | 0.85 | 0.83 | 0.72 | 0.72 | 0.81 | 0.82 | 0.83 | 0.85 | 34.67  | 8.16 |
| P01027 | Complement C3 OS=Mus musculus GN=C3 PE=1 SV=3 - [CO3_MOUSE]                                                                                           | 3.37  | 1 | 3  | 3  | 5   | 0.69 | 0.95 | 1.27 | 0.49 | 0.65 | 0.60 | 0.73 | 0.72 | 0.96 | 1.03 | 1.28 | 0.43 | 0.63 | 186.37 | 6.73 |
| Q3UMR5 | Calcium uniporter protein, mitochondrial OS=Mus musculus GN=Mcu PE=1 SV=2 - [MCU_MOUSE]                                                               | 23.14 | 2 | 7  | 7  | 23  | 0.97 | 1.29 | 1.21 | 1.20 | 1.26 | 0.74 | 0.83 | 0.72 | 0.75 | 0.89 | 0.87 | 0.89 | 0.94 | 39.66  | 8.56 |
| Q8K0C9 | GDP-mannose 4,6 dehydratase OS=Mus musculus GN=Gmids PE=2 SV=1 - [GMDS_MOUSE]                                                                         | 9.68  | 1 | 3  | 3  | 4   | 0.87 | 0.84 | 0.97 | 0.95 | 1.09 | 0.84 | 0.94 | 0.72 | 0.76 | 0.85 | 0.86 | 0.85 | 0.90 | 41.96  | 7.03 |

|          |                                                                                                         |       |   |   |   |    |      |      |      |      |      |      |      |      |      |      |      |      |      |        |       |
|----------|---------------------------------------------------------------------------------------------------------|-------|---|---|---|----|------|------|------|------|------|------|------|------|------|------|------|------|------|--------|-------|
| P63056-2 | Isoform 2 of Noelin-3<br>OS=Mus musculus<br>GN=Olfm3 -<br>[NOE3_MOUSE]                                  | 8.73  | 3 | 3 | 3 | 6  | 0.91 | 1.09 | 1.20 | 0.93 | 1.12 | 0.81 | 0.93 | 0.72 | 0.94 | 0.63 | 0.80 | 0.64 | 0.63 | 52.81  | 8.15  |
| E9Q735   | Protein Ube4a<br>OS=Mus musculus<br>GN=Ube4a PE=2<br>SV=1 -<br>[E9Q735_MOUSE]                           | 1.17  | 2 | 1 | 1 | 1  | 0.82 | 0.98 | 1.20 | 0.68 | 0.83 | 0.90 | 1.09 | 0.72 | 0.87 | 0.88 | 1.08 | 0.68 | 0.83 | 118.12 | 5.33  |
| Q9DCU2   | Plasmolipin OS=Mus<br>musculus GN=Plp<br>PE=2 SV=1 -<br>[PLLP_MOUSE]                                    | 21.43 | 1 | 2 | 2 | 4  | 1.10 | 1.30 | 1.09 | 0.87 | 0.86 | 0.81 | 0.80 | 0.72 | 0.69 | 0.74 | 0.73 | 0.95 | 0.99 | 19.79  | 9.41  |
| Q3UEZ8   | Sodium/bile acid<br>cotransporter 4<br>OS=Mus musculus<br>GN=Slc10a4 PE=2<br>SV=1 -<br>[NTCP4_MOUSE]    | 3.20  | 1 | 1 | 1 | 23 | 1.09 | 0.89 | 0.72 | 1.30 | 1.22 | 0.92 | 0.90 | 0.72 | 0.61 | 1.15 | 1.09 | 1.31 | 1.17 | 46.61  | 5.01  |
| Q3UYH7   | Beta-adrenergic<br>receptor kinase 2<br>OS=Mus musculus<br>GN=Adrbk2 PE=2<br>SV=2 -<br>[ARBK2_MOUSE]    | 10.32 | 3 | 2 | 6 | 12 | 1.10 | 0.93 | 0.80 | 1.10 | 0.99 | 0.77 | 0.69 | 0.72 | 0.65 | 1.04 | 0.94 | 0.97 | 0.88 | 79.61  | 7.69  |
| Q9D958   | Signal peptidase<br>complex subunit 1<br>OS=Mus musculus<br>GN=Specs1 PE=2<br>SV=3 -<br>[SPCS1_MOUSE]   | 8.07  | 1 | 1 | 1 | 1  | 0.87 | 0.61 | 0.70 | 1.07 | 1.23 | 0.76 | 0.87 | 0.72 | 0.83 | 0.82 | 0.95 | 0.76 | 0.88 | 18.17  | 10.01 |
| Q8BVA2   | Transmembrane<br>protein 222 OS=Mus<br>musculus<br>GN=Tmem222 PE=2<br>SV=1 -<br>[TM222_MOUSE]           | 12.50 | 1 | 1 | 1 | 2  | 0.85 | 0.92 | 1.08 | 1.14 | 1.33 | 0.88 | 1.02 | 0.72 | 0.84 | 0.83 | 0.97 | 0.81 | 0.95 | 23.16  | 6.61  |
| Q8BH24   | Transmembrane 9<br>superfamily member 4<br>OS=Mus musculus<br>GN=Tm9sf4 PE=2<br>SV=1 -<br>[TM9S4_MOUSE] | 1.24  | 1 | 1 | 1 | 1  | 1.04 | 1.19 | 1.14 | 1.29 | 1.24 | 0.84 | 0.81 | 0.72 | 0.69 | 0.95 | 0.91 | 0.88 | 0.84 | 74.64  | 7.23  |
| P39038   | Cadherin-4 OS=Mus<br>musculus GN=Cdh4<br>PE=2 SV=1 -<br>[CADH4_MOUSE]                                   | 2.41  | 1 | 1 | 2 | 5  | 0.85 | 0.82 | 0.95 | 0.77 | 0.90 | 0.78 | 0.90 | 0.72 | 0.84 | 0.75 | 0.88 | 0.75 | 0.88 | 99.97  | 4.81  |
| Q99ME2   | WD repeat-containing<br>protein 6 OS=Mus<br>musculus GN=Wdr6<br>PE=2 SV=1 -<br>[WDR6_MOUSE]             | 2.13  | 1 | 2 | 2 | 5  | 1.13 | 1.24 | 1.05 | 1.02 | 0.92 | 0.68 | 0.55 | 0.72 | 0.61 | 0.82 | 0.75 | 0.97 | 0.74 | 121.82 | 6.98  |
| Q9DB42   | Zinc finger protein 593<br>OS=Mus musculus<br>GN=Znf593 PE=2<br>SV=2 -<br>[ZNS593_MOUSE]                | 23.88 | 1 | 2 | 2 | 3  | 1.00 | 0.85 | 0.85 | 0.79 | 0.79 | 0.73 | 0.73 | 0.72 | 0.72 | 0.82 | 0.83 | 0.77 | 0.77 | 15.14  | 9.55  |
| Q9CQE6   | Histone chaperone<br>ASF1A OS=Mus<br>musculus GN=Asf1a<br>PE=2 SV=1 -<br>[ASF1A_MOUSE]                  | 5.39  | 1 | 1 | 1 | 3  | 0.94 | 0.66 | 0.70 | 0.83 | 0.88 | 0.75 | 0.79 | 0.72 | 0.76 | 0.72 | 0.76 | 0.70 | 0.75 | 22.93  | 4.41  |
| Q8VDH1-  | Isoform 2 of F-box only<br>protein 21 OS=Mus<br>musculus GN=Fbxo21 -<br>[FBX21_MOUSE]                   | 3.71  | 2 | 1 | 1 | 2  | 0.67 | 1.01 | 1.50 | 0.79 | 1.17 | 0.69 | 1.03 | 0.72 | 1.08 | 0.89 | 1.34 | 0.80 | 1.20 | 71.34  | 5.99  |

|          |                                                                                                               |       |   |    |    |    |      |      |      |      |      |      |      |      |      |      |      |      |      |        |       |
|----------|---------------------------------------------------------------------------------------------------------------|-------|---|----|----|----|------|------|------|------|------|------|------|------|------|------|------|------|------|--------|-------|
| Q8VEG4   | Exonuclease 3'-5' domain-containing protein 2 OS=Mus musculus GN=Exd2 PE=2 SV=1 - [EXD2_MOUSE]                | 2.02  | 2 | 1  | 1  | 1  | 0.75 | 0.38 | 0.50 | 0.87 | 1.16 | 0.77 | 1.02 | 0.72 | 0.96 | 0.69 | 0.93 | 0.64 | 0.86 | 56.75  | 8.16  |
| Q8CC88   | von Willebrand factor A domain-containing protein 8 OS=Mus musculus GN=Vwa8 PE=2 SV=2 - [VWA8_MOUSE]          | 3.25  | 2 | 5  | 5  | 9  | 1.04 | 1.23 | 1.20 | 1.15 | 1.09 | 0.77 | 0.72 | 0.72 | 0.65 | 0.82 | 0.83 | 0.96 | 0.83 | 213.29 | 6.60  |
| Q8BH15-4 | Isoform 6 of CCR4-NOT transcription complex subunit 10 OS=Mus musculus GN=Cnot10 - [CNO10_MOUSE]              | 30.00 | 3 | 1  | 2  | 3  | 0.74 | 0.72 | 0.96 | 0.86 | 1.16 | 0.75 | 1.00 | 0.72 | 0.97 | 0.64 | 0.87 | 0.73 | 0.99 | 11.36  | 9.77  |
| Q99K70-2 | Isoform 2 of Ras-related GTP-binding protein C OS=Mus musculus GN=Rragc - [RRAGC_MOUSE]                       | 7.69  | 2 | 1  | 1  | 2  | 1.14 | 0.79 | 0.69 | 1.10 | 0.96 | 0.83 | 0.72 | 0.72 | 0.63 | 0.74 | 0.65 | 0.98 | 0.86 | 19.64  | 5.38  |
| Q8BH59   | Calcium-binding mitochondrial carrier protein Aralar1 OS=Mus musculus GN=Slc25a12 PE=1 SV=1 - [CMC1_MOUSE]    | 55.54 | 2 | 28 | 28 | 97 | 1.07 | 1.16 | 1.15 | 1.26 | 1.24 | 0.74 | 0.71 | 0.72 | 0.67 | 0.82 | 0.79 | 0.95 | 0.89 | 74.52  | 8.25  |
| Q6P5U8-2 | Isoform 2 of Coiled-coil domain-containing protein 148 OS=Mus musculus GN=Ccdc148 - [CC148_MOUSE]             | 6.02  | 2 | 1  | 1  | 2  | 0.78 | 0.80 | 1.02 | 0.63 | 0.81 | 0.62 | 0.79 | 0.72 | 0.93 | 0.70 | 0.90 | 0.47 | 0.60 | 15.97  | 8.90  |
| Q8C4X2   | Casein kinase I isoform gamma-3 OS=Mus musculus GN=Csnk1g3 PE=1 SV=2 - [KC1G3_MOUSE]                          | 10.38 | 3 | 2  | 4  | 8  | 0.89 | 0.81 | 0.96 | 0.94 | 1.06 | 0.85 | 1.09 | 0.72 | 0.81 | 0.86 | 1.10 | 0.90 | 0.97 | 48.91  | 9.11  |
| Q52KF0   | Thioredoxin-like 4B OS=Mus musculus GN=Txn14b PE=2 SV=1 - [Q52KF0_MOUSE]                                      | 6.71  | 2 | 1  | 1  | 1  | 0.93 | 0.86 | 0.93 | 0.70 | 0.76 | 0.71 | 0.76 | 0.72 | 0.78 | 0.68 | 0.73 | 0.77 | 0.84 | 17.01  | 6.33  |
| F7ANA1   | PHD and RING finger domain-containing protein 1 (Fragment) OS=Mus musculus GN=Phr1 PE=4 SV=1 - [F7ANA1_MOUSE] | 1.68  | 3 | 1  | 1  | 3  | 0.73 | 0.77 | 1.06 | 0.98 | 1.34 | 1.06 | 1.37 | 0.72 | 0.99 | 1.05 | 1.42 | 0.91 | 1.18 | 85.95  | 9.66  |
| Q6NVG1   | Lysophospholipid acyltransferase LPCAT4 OS=Mus musculus GN=Lpcat4 PE=1 SV=1 - [LPCT4_MOUSE]                   | 8.78  | 1 | 3  | 3  | 5  | 0.95 | 1.19 | 1.25 | 1.31 | 1.38 | 0.94 | 0.98 | 0.73 | 0.77 | 0.86 | 0.90 | 1.05 | 1.09 | 57.11  | 8.75  |
| D3YX28   | Serine protease HTRA2, mitochondrial OS=Mus musculus GN=Htra2 PE=2 SV=1 - [D3YX28_MOUSE]                      | 21.33 | 5 | 5  | 5  | 9  | 0.95 | 0.79 | 0.86 | 0.90 | 0.90 | 0.65 | 0.67 | 0.73 | 0.74 | 0.76 | 0.77 | 0.65 | 0.69 | 38.92  | 10.13 |

|          |                                                                                                            |       |    |    |    |     |      |      |      |      |      |      |      |      |      |      |      |      |      |        |      |
|----------|------------------------------------------------------------------------------------------------------------|-------|----|----|----|-----|------|------|------|------|------|------|------|------|------|------|------|------|------|--------|------|
| P11679   | Keratin, type II cytoskeletal 8 OS=Mus musculus GN=Krt8 PE=1 SV=4 - [K2C8_MOUSE]                           | 6.94  | 3  | 1  | 4  | 6   | 1.29 | 1.02 | 0.79 | 2.38 | 1.84 | 0.80 | 0.62 | 0.73 | 0.56 | 1.61 | 1.25 | 1.00 | 0.77 | 54.53  | 5.82 |
| A2A8U2-  | Isoform Samp1 of Transmembrane protein 201 OS=Mus musculus GN=Tmem201 - [TM201_MOUSE]                      | 5.61  | 3  | 2  | 2  | 3   | 0.92 | 1.06 | 1.15 | 1.13 | 1.23 | 0.71 | 0.76 | 0.73 | 0.79 | 0.84 | 0.91 | 0.93 | 1.01 | 43.52  | 8.56 |
| Q9DC50   | Peroxisomal carnitine O-octanoyltransferase OS=Mus musculus GN=Crot PE=1 SV=1 - [OCTC_MOUSE]               | 4.08  | 1  | 2  | 2  | 5   | 1.23 | 1.26 | 1.02 | 0.70 | 0.57 | 0.76 | 0.67 | 0.73 | 0.59 | 0.78 | 0.64 | 0.63 | 0.64 | 70.22  | 6.73 |
| Q8VCV1   | Alpha/beta hydrolase domain-containing protein 17C OS=Mus musculus GN=Abhd17c PE=2 SV=2 - [AB17C_MOUSE]    | 7.50  | 1  | 1  | 1  | 1   | 0.43 | 0.89 | 2.07 | 0.84 | 1.95 | 0.78 | 1.80 | 0.73 | 1.69 | 1.23 | 2.87 | 0.80 | 1.88 | 35.08  | 5.64 |
| P42669   | Transcriptional activator protein Pur-alpha OS=Mus musculus GN=Pura PE=1 SV=1 - [PURA_MOUSE]               | 59.50 | 1  | 16 | 18 | 128 | 1.04 | 0.98 | 0.90 | 0.92 | 0.89 | 0.68 | 0.64 | 0.73 | 0.69 | 0.65 | 0.64 | 0.67 | 0.65 | 34.86  | 6.44 |
| E9PWY6   | 2-amino-3-ketobutyrate coenzyme A ligase, mitochondrial OS=Mus musculus GN=Gcat PE=2 SV=1 - [E9PWY6_MOUSE] | 10.99 | 2  | 3  | 3  | 8   | 0.82 | 1.29 | 1.46 | 0.99 | 1.27 | 0.80 | 0.84 | 0.73 | 0.78 | 0.75 | 1.00 | 0.77 | 1.03 | 41.31  | 7.91 |
| Q58A65-2 | Isoform 2 of C-Jun-amino-terminal kinase-interacting protein 4 OS=Mus musculus GN=Spag9 - [JIP4_MOUSE]     | 27.70 | 10 | 26 | 28 | 98  | 0.96 | 0.88 | 0.93 | 0.92 | 0.97 | 0.74 | 0.77 | 0.73 | 0.79 | 0.71 | 0.76 | 0.72 | 0.76 | 144.61 | 5.15 |
| F7BX26   | Serine/threonine-protein phosphatase (Fragment) OS=Mus musculus GN=Ppp5c PE=3 SV=1 - [F7BX26_MOUSE]        | 42.44 | 3  | 15 | 15 | 123 | 0.99 | 0.98 | 0.98 | 0.93 | 0.93 | 0.69 | 0.71 | 0.73 | 0.72 | 0.71 | 0.72 | 0.71 | 0.72 | 54.28  | 6.20 |
| Q60759   | Glutaryl-CoA dehydrogenase, mitochondrial OS=Mus musculus GN=Gedh PE=2 SV=2 - [GCDH_MOUSE]                 | 13.47 | 2  | 4  | 4  | 9   | 1.00 | 0.99 | 0.92 | 1.06 | 1.06 | 0.88 | 0.79 | 0.73 | 0.74 | 0.92 | 0.95 | 0.92 | 0.89 | 48.57  | 8.73 |
| Q8VDP6   | CDP-diacylglycerol--inositol 3-phosphatidyltransferase OS=Mus musculus GN=Cdipt PE=1 SV=1 - [CDIPT_MOUSE]  | 5.16  | 1  | 1  | 1  | 2   | 0.98 | 1.04 | 1.06 | 1.19 | 1.21 | 0.75 | 0.76 | 0.73 | 0.74 | 0.71 | 0.72 | 1.03 | 1.05 | 23.58  | 8.27 |
| Q811C2   | Cysteine protease ATG4C OS=Mus musculus GN=Atg4c PE=2 SV=2 - [ATG4C_MOUSE]                                 | 4.37  | 1  | 1  | 1  | 2   | 0.85 | 1.09 | 1.27 | 1.00 | 1.18 | 1.02 | 1.19 | 0.73 | 0.85 | 1.06 | 1.25 | 1.11 | 1.30 | 52.02  | 6.43 |

|          |                                                                                                            |       |   |    |    |    |      |      |      |      |      |      |      |      |      |      |      |      |      |        |       |
|----------|------------------------------------------------------------------------------------------------------------|-------|---|----|----|----|------|------|------|------|------|------|------|------|------|------|------|------|------|--------|-------|
| O54864-2 | Isoform 2 of Histone-lysine N-methyltransferase SUV39H1 OS=Mus musculus GN=Suv39h1 - [SUV91_MOUSE]         | 3.53  | 1 | 1  | 1  | 1  | 0.79 | 1.28 | 1.62 | 0.92 | 1.16 | 0.78 | 0.98 | 0.73 | 0.92 | 0.77 | 0.98 | 0.66 | 0.84 | 51.86  | 8.37  |
| Q62465   | Synaptic vesicle membrane protein VAT-1 homolog OS=Mus musculus GN=Vat1 PE=1 SV=3 - [VAT1_MOUSE]           | 41.38 | 1 | 12 | 12 | 29 | 1.15 | 0.95 | 0.84 | 1.01 | 0.84 | 0.80 | 0.67 | 0.73 | 0.66 | 0.91 | 0.82 | 0.89 | 0.83 | 43.07  | 6.37  |
| Q64674   | Spermidine synthase OS=Mus musculus GN=Srm PE=2 SV=1 - [SPEE_MOUSE]                                        | 10.26 | 1 | 3  | 3  | 5  | 1.16 | 1.02 | 0.79 | 1.20 | 1.03 | 0.93 | 0.80 | 0.73 | 0.63 | 0.83 | 0.82 | 0.98 | 0.83 | 33.97  | 5.50  |
| Q3TL44   | NLR family member X1 OS=Mus musculus GN=Nlr1 PE=2 SV=1 - [NLRX1_MOUSE]                                     | 1.03  | 1 | 1  | 1  | 2  | 1.26 | 1.59 | 1.26 | 1.25 | 0.99 | 0.85 | 0.67 | 0.73 | 0.58 | 0.85 | 0.68 | 1.14 | 0.91 | 107.76 | 7.37  |
| F6W3U3   | Protein 2310061104Rik (Fragment) OS=Mus musculus GN=2310061104Rik PE=4 SV=1 - [F6W3U3_MOUSE]               | 11.01 | 4 | 1  | 1  | 4  | 0.97 | 1.00 | 1.03 | 1.09 | 1.12 | 0.77 | 0.79 | 0.73 | 0.75 | 0.80 | 0.82 | 0.96 | 0.98 | 13.20  | 10.26 |
| Q8BIP0   | Aspartate--tRNA ligase, mitochondrial OS=Mus musculus GN=Dars2 PE=2 SV=1 - [SYDM_MOUSE]                    | 3.83  | 1 | 2  | 2  | 2  | 1.02 | 1.09 | 1.07 | 0.99 | 0.97 | 0.86 | 0.84 | 0.73 | 0.71 | 0.91 | 0.89 | 0.91 | 0.89 | 74.06  | 6.98  |
| Q9CQV6   | Microtubule-associated proteins 1A/1B light chain 3B OS=Mus musculus GN=Map1lc3b PE=1 SV=3 - [MLP3B_MOUSE] | 20.00 | 3 | 3  | 4  | 35 | 0.80 | 0.68 | 0.98 | 0.84 | 1.20 | 0.67 | 0.85 | 0.73 | 0.94 | 0.67 | 0.92 | 0.61 | 0.78 | 14.61  | 8.43  |
| Q99PH1   | Leucine-rich repeat-containing protein 4 OS=Mus musculus GN=Lrrc4 PE=1 SV=2 - [LRRC4_MOUSE]                | 2.15  | 1 | 1  | 1  | 2  | 1.05 | 1.24 | 1.18 | 1.04 | 0.99 | 0.75 | 0.71 | 0.73 | 0.70 | 0.64 | 0.61 | 0.68 | 0.65 | 72.57  | 7.01  |
| Q9CQR6   | Serine/threonine-protein phosphatase 6 catalytic subunit OS=Mus musculus GN=Ppp6c PE=2 SV=1 - [PPP6_MOUSE] | 8.20  | 1 | 2  | 2  | 4  | 1.15 | 1.04 | 0.90 | 0.97 | 0.84 | 0.81 | 0.70 | 0.73 | 0.63 | 0.73 | 0.63 | 0.92 | 0.80 | 35.14  | 5.69  |
| Q3TYS2   | Uncharacterized protein C17orf62 homolog OS=Mus musculus PE=2 SV=2 - [CQ062_MOUSE]                         | 5.35  | 1 | 1  | 1  | 2  | 1.06 | 1.17 | 1.11 | 0.91 | 0.86 | 0.85 | 0.80 | 0.73 | 0.69 | 0.83 | 0.78 | 1.05 | 1.00 | 20.91  | 8.59  |
| Q3TE80   | Protein 2410002F23Rik OS=Mus musculus GN=2410002F23Rik PE=2 SV=1 - [Q3TE80_MOUSE]                          | 10.92 | 4 | 3  | 3  | 5  | 1.06 | 1.23 | 1.19 | 1.04 | 0.98 | 0.94 | 0.89 | 0.73 | 0.69 | 0.79 | 0.75 | 0.95 | 0.96 | 32.35  | 6.32  |

|          |                                                                                                                  |       |   |    |    |     |      |      |      |      |      |      |      |      |      |      |      |      |      |        |      |
|----------|------------------------------------------------------------------------------------------------------------------|-------|---|----|----|-----|------|------|------|------|------|------|------|------|------|------|------|------|------|--------|------|
| Q8BFS6   | Calcineurin-like phosphoesterase domain-containing protein 1 OS=Mus musculus GN=Cpped1 PE=2 SV=1 - [CPPED_MOUSE] | 35.26 | 6 | 7  | 7  | 22  | 1.00 | 0.80 | 0.81 | 0.94 | 0.94 | 0.81 | 0.80 | 0.73 | 0.71 | 0.66 | 0.64 | 0.72 | 0.72 | 35.23  | 5.34 |
| Q80UK0   | SEC14 domain and spectrin repeat-containing protein 1 OS=Mus musculus GN=Sestd1 PE=2 SV=1 - [SESD1_MOUSE]        | 1.44  | 1 | 1  | 1  | 1   | 0.82 | 0.91 | 1.11 | 0.81 | 0.99 | 0.69 | 0.83 | 0.74 | 0.89 | 1.02 | 1.25 | 1.07 | 1.31 | 79.33  | 5.10 |
| D3Z3D2   | Nuclear cap-binding protein subunit 2 OS=Mus musculus GN=Ncbp2 PE=2 SV=1 - [D3Z3D2_MOUSE]                        | 10.68 | 2 | 1  | 1  | 1   | 0.56 | 0.78 | 1.39 | 0.71 | 1.27 | 0.69 | 1.22 | 0.74 | 1.31 | 0.71 | 1.27 | 0.58 | 1.05 | 11.94  | 8.34 |
| Q9Z2Y3   | Homer protein homolog 1 OS=Mus musculus GN=Homer1 PE=1 SV=2 - [HOME1_MOUSE]                                      | 61.20 | 9 | 17 | 25 | 240 | 0.87 | 0.89 | 1.00 | 0.84 | 0.97 | 0.69 | 0.76 | 0.74 | 0.85 | 0.61 | 0.69 | 0.61 | 0.71 | 41.39  | 5.53 |
| Q99PP2   | Zinc finger protein 318 (Fragment) OS=Mus musculus GN=Znf318 PE=1 SV=2 - [ZN318_MOUSE]                           | 1.11  | 4 | 2  | 2  | 3   | 0.79 | 0.72 | 0.91 | 0.67 | 0.85 | 0.95 | 1.19 | 0.74 | 0.93 | 0.91 | 1.15 | 0.81 | 1.03 | 228.08 | 5.96 |
| Q62413   | Ephrin type-A receptor 6 OS=Mus musculus GN=Epha6 PE=2 SV=2 - [EPHA6_MOUSE]                                      | 3.38  | 5 | 1  | 4  | 7   | 1.03 | 1.04 | 1.01 | 1.07 | 1.04 | 0.85 | 0.82 | 0.74 | 0.71 | 0.92 | 0.89 | 0.88 | 0.86 | 116.11 | 6.95 |
| Q8C0J2-4 | Isoform 4 of Autophagy-related protein 16-1 OS=Mus musculus GN=Atg16l1 - [A16L1_MOUSE]                           | 15.60 | 6 | 4  | 4  | 5   | 0.83 | 0.97 | 1.30 | 0.97 | 1.09 | 0.88 | 0.99 | 0.74 | 1.01 | 0.96 | 1.03 | 0.87 | 1.21 | 52.99  | 5.94 |
| P26049   | Gamma-aminobutyric acid receptor subunit alpha-3 OS=Mus musculus GN=Gabra3 PE=1 SV=1 - [GBRA3_MOUSE]             | 6.30  | 3 | 1  | 3  | 8   | 0.99 | 0.79 | 0.80 | 1.13 | 1.14 | 0.74 | 0.74 | 0.74 | 0.74 | 0.88 | 0.89 | 0.83 | 0.83 | 55.36  | 8.94 |
| E9PV21   | Tetrapeptide repeat protein 39C OS=Mus musculus GN=Ttc39c PE=2 SV=1 - [E9PV21_MOUSE]                             | 2.30  | 3 | 1  | 1  | 2   | 1.17 | 1.02 | 0.87 | 1.11 | 0.95 | 0.92 | 0.78 | 0.74 | 0.63 | 1.09 | 0.93 | 1.17 | 1.00 | 58.88  | 7.50 |
| F6SZ47   | Serine/threonine-protein kinase B-raf (Fragment) OS=Mus musculus GN=Braf PE=2 SV=1 - [F6SZ47_MOUSE]              | 12.53 | 4 | 1  | 6  | 14  | 1.08 | 0.90 | 0.83 | 0.58 | 0.53 | 1.35 | 1.24 | 0.74 | 0.68 | 0.99 | 0.92 | 0.91 | 0.85 | 83.15  | 7.68 |



|        |                                                                                                                          |       |    |    |    |    |      |      |      |      |      |      |      |      |      |      |      |      |      |        |      |
|--------|--------------------------------------------------------------------------------------------------------------------------|-------|----|----|----|----|------|------|------|------|------|------|------|------|------|------|------|------|------|--------|------|
| E9PX48 | Dedicator of cytokinesis protein 7<br>OS=Mus musculus<br>GN=Dock7 PE=2<br>SV=1 -<br>[E9PX48_MOUSE]                       | 0.81  | 4  | 1  | 1  | 2  | 1.05 | 0.99 | 0.94 | 1.06 | 1.00 | 0.99 | 0.94 | 0.74 | 0.70 | 0.98 | 0.93 | 0.99 | 0.94 | 237.95 | 6.79 |
| Q9D2F8 | Protein 4930547C10Rik<br>OS=Mus musculus<br>GN=4930547C10Rik<br>PE=2 SV=1 -<br>[Q9D2F8_MOUSE]                            | 3.22  | 1  | 1  | 1  | 1  | 1.68 | 2.08 | 1.24 | 0.69 | 0.41 | 0.71 | 0.42 | 0.74 | 0.44 | 0.70 | 0.42 | 0.74 | 0.44 | 77.84  | 9.61 |
| Q8BRQ9 | Sideroflexin-5<br>OS=Mus musculus<br>GN=Sfxn5 PE=2 SV=1<br>-[Q8BRQ9_MOUSE]                                               | 23.84 | 3  | 5  | 5  | 11 | 1.01 | 1.25 | 1.17 | 1.24 | 1.26 | 0.61 | 0.75 | 0.74 | 0.69 | 0.82 | 0.79 | 0.72 | 0.76 | 32.76  | 9.36 |
| P42208 | Septin-2 OS=Mus musculus<br>GN=Sept2 PE=1 SV=2 -<br>[SEPT2_MOUSE]                                                        | 70.91 | 10 | 16 | 17 | 59 | 0.94 | 0.97 | 0.97 | 0.97 | 1.03 | 0.75 | 0.78 | 0.74 | 0.79 | 0.74 | 0.76 | 0.77 | 0.83 | 41.50  | 6.55 |
| Q4VBE7 | BTB/POZ domain-containing protein<br>KCTD2 OS=Mus musculus<br>GN=Kctd2 PE=2 SV=1 -<br>[Q4VBE7_MOUSE]                     | 6.84  | 3  | 1  | 1  | 2  | 1.15 | 1.31 | 1.13 | 1.13 | 0.99 | 0.62 | 0.53 | 0.74 | 0.64 | 0.62 | 0.54 | 0.67 | 0.58 | 28.56  | 5.29 |
| O09164 | Extracellular superoxide dismutase<br>[Cu-Zn] OS=Mus musculus<br>GN=Sod3 PE=1 SV=1 -<br>[SODE_MOUSE]                     | 11.16 | 1  | 2  | 2  | 5  | 1.02 | 0.95 | 1.02 | 0.90 | 0.88 | 0.79 | 0.76 | 0.74 | 0.72 | 0.83 | 0.81 | 0.98 | 0.96 | 27.37  | 6.84 |
| Q8CGQ8 | Isoform 2 of Sodium/potassium/calcium exchanger 4<br>OS=Mus musculus<br>GN=Slc24a4 -<br>[NCKX4_MOUSE]                    | 2.89  | 3  | 1  | 1  | 3  | 0.87 | 0.91 | 1.03 | 1.00 | 1.14 | 0.76 | 0.86 | 0.74 | 0.85 | 0.89 | 1.02 | 0.91 | 1.05 | 61.08  | 7.93 |
| Q9CXJ4 | ATP-binding cassette sub-family B member 8, mitochondrial<br>OS=Mus musculus<br>GN=Abcb8 PE=2<br>SV=1 -<br>[ABCB8_MOUSE] | 7.53  | 3  | 4  | 4  | 7  | 1.03 | 1.30 | 1.28 | 1.17 | 1.16 | 0.72 | 0.72 | 0.74 | 0.72 | 0.87 | 0.91 | 0.95 | 0.95 | 77.95  | 9.07 |
| Q8BW22 | Calcium-responsive transactivator OS=Mus musculus<br>GN=Ss1811 PE=1 SV=1 -<br>[CREST_MOUSE]                              | 13.93 | 1  | 3  | 3  | 4  | 0.81 | 0.60 | 0.82 | 0.68 | 0.84 | 0.94 | 1.04 | 0.74 | 0.96 | 0.65 | 0.85 | 0.63 | 0.82 | 43.70  | 6.58 |
| Q3UEG7 | Inter-alpha-trypsin inhibitor heavy chain H2 (Fragment)<br>OS=Mus musculus<br>GN=Itih2 PE=2 SV=1 -<br>[Q3UEG7_MOUSE]     | 3.32  | 3  | 1  | 1  | 2  | 0.82 | 0.93 | 1.13 | 0.58 | 0.71 | 0.80 | 0.97 | 0.74 | 0.90 | 0.91 | 1.11 | 0.75 | 0.92 | 50.71  | 6.21 |
| Q9JIA4 | Ribosome biogenesis protein WDR12<br>OS=Mus musculus<br>GN=Wdr12 PE=2<br>SV=1 -<br>[WDR12_MOUSE]                         | 13.95 | 2  | 3  | 3  | 5  | 0.99 | 0.79 | 0.85 | 0.99 | 0.87 | 0.72 | 0.68 | 0.74 | 0.71 | 0.66 | 0.67 | 0.83 | 0.80 | 47.32  | 5.60 |

|          |                                                                                                              |       |   |    |    |    |      |      |      |      |      |      |      |      |      |      |      |      |      |        |       |
|----------|--------------------------------------------------------------------------------------------------------------|-------|---|----|----|----|------|------|------|------|------|------|------|------|------|------|------|------|------|--------|-------|
| Q99KE1   | NAD-dependent malic enzyme, mitochondrial<br>OS=Mus musculus<br>GN=Me2 PE=2 SV=1 -<br>[MAOM_MOUSE]           | 23.94 | 1 | 8  | 9  | 19 | 1.00 | 1.16 | 1.15 | 1.23 | 1.30 | 0.91 | 0.91 | 0.74 | 0.78 | 0.97 | 0.97 | 0.99 | 1.06 | 65.76  | 7.61  |
| P17563   | Selenium-binding protein 1<br>OS=Mus musculus<br>GN=Selenbp1 PE=1<br>SV=2 -<br>[SBP1_MOUSE]                  | 42.58 | 6 | 15 | 15 | 37 | 1.12 | 1.02 | 1.03 | 1.05 | 0.93 | 0.76 | 0.71 | 0.74 | 0.71 | 0.76 | 0.68 | 0.80 | 0.71 | 52.48  | 6.29  |
| Q6ZWZ2   | Ubiquitin-conjugating enzyme E2 R2<br>OS=Mus musculus<br>GN=Ube2r2 PE=2<br>SV=1 -<br>[UB2R2_MOUSE]           | 18.49 | 1 | 2  | 2  | 7  | 0.94 | 1.09 | 1.15 | 0.89 | 0.95 | 0.86 | 0.91 | 0.74 | 0.75 | 0.82 | 0.87 | 0.79 | 0.84 | 27.15  | 4.42  |
| Q8R349   | Cell division cycle protein 16 homolog<br>OS=Mus musculus<br>GN=Cdc16 PE=2<br>SV=1 -<br>[CDC16_MOUSE]        | 2.74  | 1 | 1  | 1  | 1  | 0.85 | 1.08 | 1.27 | 0.57 | 0.67 | 0.52 | 0.61 | 0.75 | 0.87 | 0.71 | 0.84 | 0.59 | 0.69 | 71.41  | 5.76  |
| Q9Z0S9   | Prenylated Rab acceptor protein 1<br>OS=Mus musculus<br>GN=Rabac1 PE=1<br>SV=1 -<br>[PRAF1_MOUSE]            | 7.57  | 1 | 1  | 1  | 3  | 0.81 | 1.39 | 1.72 | 0.98 | 1.22 | 0.80 | 0.99 | 0.75 | 0.92 | 0.77 | 0.96 | 0.89 | 1.10 | 20.61  | 7.90  |
| Q9JHW2   | Omega-amidase NIT2<br>OS=Mus musculus<br>GN=Nit2 PE=1 SV=1 -<br>[NIT2_MOUSE]                                 | 42.75 | 1 | 8  | 8  | 26 | 0.97 | 0.87 | 0.93 | 0.97 | 1.01 | 0.76 | 0.75 | 0.75 | 0.72 | 0.77 | 0.78 | 0.83 | 0.88 | 30.48  | 6.90  |
| Q80Y50.5 | Isoform 5 of Calmodulin-binding transcription activator 2<br>OS=Mus musculus<br>GN=Camta2 -<br>[CMTA2_MOUSE] | 1.90  | 7 | 1  | 1  | 2  | 1.23 | 1.21 | 0.99 | 1.49 | 1.21 | 0.91 | 0.74 | 0.75 | 0.61 | 0.79 | 0.65 | 1.10 | 0.90 | 107.79 | 6.42  |
| Q922P8   | Transmembrane protein 132A<br>OS=Mus musculus<br>GN=Tmem132a PE=2<br>SV=2 -<br>[T132A_MOUSE]                 | 16.40 | 2 | 11 | 11 | 28 | 1.04 | 1.08 | 1.05 | 0.99 | 0.93 | 0.78 | 0.73 | 0.75 | 0.78 | 0.77 | 0.73 | 0.70 | 0.72 | 110.17 | 5.63  |
| D3YWZ5   | Transporter (Fragment)<br>OS=Mus musculus<br>GN=Slc6a13 PE=2<br>SV=1 -<br>[D3YWZ5_MOUSE]                     | 4.69  | 2 | 1  | 1  | 2  | 1.06 | 1.05 | 0.99 | 0.99 | 0.93 | 0.52 | 0.49 | 0.75 | 0.70 | 0.82 | 0.78 | 0.68 | 0.64 | 21.51  | 5.10  |
| P61514   | 60S ribosomal protein L37a<br>OS=Mus musculus<br>GN=Rpl37a PE=2 SV=2 -<br>[RL37A_MOUSE]                      | 32.61 | 1 | 2  | 2  | 2  | 0.76 | 0.95 | 1.25 | 0.98 | 1.30 | 0.82 | 1.08 | 0.75 | 0.98 | 0.84 | 1.12 | 0.92 | 1.21 | 10.27  | 10.43 |
| P23818   | Glutamate receptor 1<br>OS=Mus musculus<br>GN=Gria1 PE=1 SV=1 -<br>[GRIA1_MOUSE]                             | 20.73 | 2 | 1  | 15 | 34 | 1.00 | 0.70 | 0.70 | 0.98 | 0.98 | 0.79 | 0.79 | 0.75 | 0.75 | 0.84 | 0.84 | 0.79 | 0.79 | 101.50 | 7.69  |
| Q9CQS4   | Solute carrier family 25 member 46<br>OS=Mus musculus<br>GN=Slc25a46 PE=1<br>SV=1 -<br>[S2546_MOUSE]         | 11.00 | 1 | 3  | 3  | 7  | 0.88 | 1.14 | 1.38 | 1.04 | 1.17 | 0.70 | 0.84 | 0.75 | 0.86 | 0.77 | 0.87 | 0.77 | 0.87 | 46.19  | 7.64  |

|        |                                                                                                |       |   |    |    |    |      |      |      |      |      |      |      |      |      |      |      |      |      |       |      |
|--------|------------------------------------------------------------------------------------------------|-------|---|----|----|----|------|------|------|------|------|------|------|------|------|------|------|------|------|-------|------|
| O55125 | Protein NipSnap homolog 1 OS=Mus musculus GN=Nipsnap1 PE=1 SV=1 - [NIPS1_MOUSE]                | 60.92 | 2 | 13 | 13 | 33 | 0.88 | 0.92 | 1.14 | 0.95 | 1.08 | 0.71 | 0.82 | 0.75 | 0.89 | 0.74 | 0.87 | 0.79 | 0.87 | 33.34 | 9.44 |
| Q61884 | Meiosis-specific nuclear structural protein 1 OS=Mus musculus GN=Mns1 PE=1 SV=1 - [MNS1_MOUSE] | 1.83  | 1 | 1  | 1  | 1  | 1.27 | 0.78 | 0.61 | 0.95 | 0.75 | 0.58 | 0.46 | 0.75 | 0.59 | 0.74 | 0.58 | 0.73 | 0.57 | 60.20 | 6.65 |
| Q99ML4 | Protein FAM69B OS=Mus musculus GN=Fam69b PE=1 SV=1 - [FA69B_MOUSE]                             | 3.25  | 1 | 1  | 1  | 2  | 1.07 | 1.32 | 1.23 | 1.12 | 1.05 | 0.78 | 0.72 | 0.75 | 0.70 | 0.91 | 0.85 | 1.02 | 0.95 | 48.76 | 8.15 |
| Q810C1 | SLIT and NTRK-like protein 1 OS=Mus musculus GN=Slitrk1 PE=2 SV=1 - [SLIK1_MOUSE]              | 4.45  | 1 | 3  | 3  | 4  | 0.98 | 0.73 | 0.67 | 0.91 | 0.93 | 0.75 | 0.70 | 0.75 | 0.62 | 0.75 | 0.62 | 0.75 | 0.67 | 77.77 | 6.49 |
| Q3TYX3 | SET and MYND domain-containing protein 5 OS=Mus musculus GN=Smyd5 PE=2 SV=2 - [SMYD5_MOUSE]    | 4.81  | 1 | 2  | 2  | 3  | 1.05 | 1.17 | 1.11 | 1.06 | 1.00 | 0.81 | 0.76 | 0.75 | 0.71 | 0.91 | 0.86 | 1.04 | 0.99 | 47.06 | 5.21 |
| P61021 | Ras-related protein Rab5B OS=Mus musculus GN=Rab5b PE=1 SV=1 - [RAB5B_MOUSE]                   | 25.12 | 2 | 2  | 4  | 30 | 1.15 | 1.08 | 0.89 | 1.25 | 1.06 | 0.77 | 0.69 | 0.75 | 0.70 | 0.81 | 0.65 | 0.99 | 0.85 | 23.69 | 8.13 |
| Q9CQJ3 | Glia maturation factor beta OS=Mus musculus GN=Gmfb PE=1 SV=3 - [GMFB_MOUSE]                   | 65.49 | 5 | 9  | 9  | 83 | 0.97 | 0.81 | 0.84 | 0.82 | 0.90 | 0.71 | 0.75 | 0.75 | 0.78 | 0.64 | 0.70 | 0.69 | 0.72 | 16.71 | 5.16 |
| Q60631 | Growth factor receptor-bound protein 2 OS=Mus musculus GN=Grb2 PE=1 SV=1 - [GRB2_MOUSE]        | 65.90 | 4 | 13 | 13 | 55 | 0.89 | 0.69 | 0.81 | 0.78 | 0.93 | 0.67 | 0.75 | 0.75 | 0.87 | 0.66 | 0.82 | 0.69 | 0.82 | 25.22 | 6.32 |
| Q8CHK3 | Lysophospholipid acyltransferase 7 OS=Mus musculus GN=Mboat7 PE=2 SV=1 - [MBOA7_MOUSE]         | 2.54  | 1 | 1  | 1  | 2  | 0.95 | 0.63 | 0.67 | 1.29 | 1.36 | 0.79 | 0.83 | 0.75 | 0.79 | 0.97 | 1.02 | 0.98 | 1.04 | 53.40 | 8.69 |
| Q9CXW3 | Calcyclin-binding protein OS=Mus musculus GN=Cacybp PE=1 SV=1 - [CYBP_MOUSE]                   | 50.22 | 1 | 11 | 12 | 41 | 1.22 | 0.67 | 0.61 | 0.92 | 0.78 | 0.70 | 0.58 | 0.75 | 0.60 | 0.71 | 0.58 | 0.74 | 0.63 | 26.49 | 7.87 |
| Q9Z255 | Ubiquitin-conjugating enzyme E2 A OS=Mus musculus GN=Ube2a PE=2 SV=1 - [UBE2A_MOUSE]           | 17.76 | 1 | 2  | 2  | 5  | 1.02 | 0.92 | 0.90 | 0.84 | 0.82 | 0.78 | 0.78 | 0.75 | 0.68 | 0.67 | 0.66 | 0.68 | 0.68 | 17.30 | 5.15 |
| G3X9E8 | MCGI5724, isoform CRA_a OS=Mus musculus GN=Ppp2r3a PE=4 SV=1 - [G3X9E8_MOUSE]                  | 2.64  | 2 | 1  | 1  | 2  | 1.04 | 1.17 | 1.12 | 1.00 | 0.96 | 0.82 | 0.78 | 0.75 | 0.72 | 0.80 | 0.77 | 0.95 | 0.91 | 61.07 | 4.96 |

|          |                                                                                                                           |       |   |    |    |    |      |      |      |      |      |      |      |      |      |      |      |      |      |        |      |
|----------|---------------------------------------------------------------------------------------------------------------------------|-------|---|----|----|----|------|------|------|------|------|------|------|------|------|------|------|------|------|--------|------|
| A2ALK8   | Tyrosine-protein phosphatase non-receptor type 3<br>OS=Mus musculus<br>GN=Ptpn3 PE=2 SV=1<br>-[PTN3_MOUSE]                | 1.20  | 1 | 1  | 1  | 2  | 0.82 | 0.44 | 0.54 | 1.01 | 1.23 | 0.80 | 0.97 | 0.75 | 0.92 | 0.75 | 0.92 | 0.59 | 0.73 | 103.83 | 7.20 |
| P03911   | NADH-ubiquinone oxidoreductase chain 4<br>OS=Mus musculus<br>GN=Mtnd4 PE=1<br>SV=1 -<br>[NU4M_MOUSE]                      | 3.05  | 1 | 1  | 1  | 2  | 0.96 | 1.17 | 1.22 | 1.17 | 1.22 | 0.67 | 0.70 | 0.75 | 0.78 | 0.73 | 0.76 | 0.89 | 0.94 | 51.85  | 9.38 |
| Q8R5H1   | Ubiquitin carboxyl-terminal hydrolase 15<br>OS=Mus musculus<br>GN=Usp15 PE=2<br>SV=1 -<br>[UBP15_MOUSE]                   | 26.91 | 5 | 19 | 20 | 32 | 0.90 | 0.83 | 0.96 | 0.95 | 1.06 | 0.74 | 0.84 | 0.75 | 0.92 | 0.75 | 0.85 | 0.71 | 0.79 | 112.25 | 5.17 |
| B1AS67   | Pleckstrin homology domain-containing family G member 5<br>OS=Mus musculus<br>GN=Plekkg5 PE=2<br>SV=1 -<br>[B1AS67_MOUSE] | 3.49  | 3 | 2  | 2  | 4  | 0.85 | 1.81 | 2.12 | 0.95 | 1.12 | 0.92 | 1.07 | 0.75 | 0.88 | 0.82 | 0.97 | 0.84 | 0.99 | 117.77 | 6.83 |
| P34884   | Macrophage migration inhibitory factor<br>OS=Mus musculus<br>GN=Mif PE=1 SV=2 -<br>[MIF_MOUSE]                            | 36.52 | 1 | 3  | 3  | 21 | 0.84 | 1.02 | 1.22 | 0.93 | 1.10 | 0.67 | 0.79 | 0.75 | 0.82 | 0.73 | 0.82 | 0.87 | 0.98 | 12.50  | 7.34 |
| D3Z2B3   | Protein Acad12<br>OS=Mus musculus<br>GN=Acad12 PE=2<br>SV=1 -<br>[D3Z2B3_MOUSE]                                           | 2.68  | 3 | 1  | 1  | 1  | 0.87 | 0.99 | 1.14 | 0.99 | 1.13 | 0.72 | 0.82 | 0.75 | 0.86 | 0.76 | 0.88 | 0.72 | 0.83 | 41.32  | 8.31 |
| E9QA19   | CCR4-NOT transcription complex subunit 4<br>OS=Mus musculus<br>GN=Cnot4 PE=2 SV=1 -<br>[E9QA19_MOUSE]                     | 11.53 | 4 | 6  | 6  | 10 | 1.05 | 0.89 | 0.86 | 1.02 | 0.97 | 0.66 | 0.66 | 0.75 | 0.80 | 0.69 | 0.74 | 0.71 | 0.74 | 70.74  | 7.14 |
| P32211   | Muscarinic acetylcholine receptor M4<br>OS=Mus musculus<br>GN=Chrm4 PE=2<br>SV=1 -<br>[ACM4_MOUSE]                        | 5.43  | 1 | 1  | 1  | 1  | 1.04 | 0.80 | 0.77 | 0.95 | 0.91 | 0.69 | 0.66 | 0.75 | 0.72 | 0.71 | 0.69 | 0.76 | 0.73 | 52.94  | 9.88 |
| Q8R5L3-2 | Isoform 2 of Vam6 Vps39-like protein<br>OS=Mus musculus<br>GN=Vps39 -<br>[VPS39_MOUSE]                                    | 2.51  | 2 | 1  | 2  | 2  | 1.40 | 2.49 | 1.78 | 1.29 | 0.92 | 1.16 | 0.83 | 0.75 | 0.54 | 1.05 | 0.75 | 1.10 | 0.79 | 100.59 | 7.12 |
| Q922E6   | FAST kinase domain-containing protein 2<br>OS=Mus musculus<br>GN=Fastkd2 PE=2<br>SV=2 -<br>[FAKD2_MOUSE]                  | 2.61  | 1 | 1  | 1  | 2  | 0.99 | 0.98 | 0.99 | 1.03 | 1.04 | 0.85 | 0.86 | 0.75 | 0.76 | 0.89 | 0.90 | 1.00 | 1.01 | 78.90  | 8.90 |
| Q921Y0-2 | Isoform 2 of MOB kinase activator 1A<br>OS=Mus musculus<br>GN=Mob1a -<br>[MOB1A_MOUSE]                                    | 7.86  | 4 | 1  | 1  | 2  | 0.70 | 0.71 | 1.01 | 0.82 | 1.18 | 0.60 | 0.86 | 0.75 | 1.07 | 0.74 | 1.05 | 0.55 | 0.78 | 16.33  | 8.94 |

|          |                                                                                                                                             |       |   |    |    |    |      |      |      |      |      |      |      |      |      |      |      |      |      |        |      |
|----------|---------------------------------------------------------------------------------------------------------------------------------------------|-------|---|----|----|----|------|------|------|------|------|------|------|------|------|------|------|------|------|--------|------|
| O09126   | Semaphorin-4D<br>OS=Mus musculus<br>GN=Sema4d PE=1<br>SV=2 -<br>[SEM4D_MOUSE]                                                               | 5.11  | 1 | 3  | 3  | 5  | 0.97 | 0.78 | 0.80 | 1.04 | 1.07 | 0.76 | 0.78 | 0.75 | 0.78 | 0.97 | 0.97 | 0.86 | 0.89 | 95.58  | 7.81 |
| Q9EPK7-2 | Isoform 2 of Exportin-7<br>OS=Mus musculus<br>GN=Xpo7 -<br>[XPO7_MOUSE]                                                                     | 5.58  | 3 | 5  | 5  | 6  | 0.99 | 1.07 | 1.03 | 1.02 | 0.92 | 0.80 | 0.83 | 0.75 | 0.86 | 0.88 | 0.78 | 1.08 | 1.15 | 120.31 | 6.38 |
| POC6F1   | Dynein heavy chain 2,<br>axonemal OS=Mus<br>musculus GN=Dnah2<br>PE=2 SV=1 -<br>[DYH2_MOUSE]                                                | 0.40  | 2 | 1  | 1  | 1  | 0.61 | 0.93 | 1.52 | 1.28 | 2.08 | 0.62 | 1.01 | 0.75 | 1.23 | 0.87 | 1.41 | 0.58 | 0.94 | 511.24 | 6.43 |
| Q9R112   | Sulfide:quinone<br>oxidoreductase,<br>mitochondrial OS=Mus<br>musculus GN=Sqrtd1<br>PE=2 SV=3 -<br>[SQRD_MOUSE]                             | 2.22  | 1 | 1  | 1  | 1  | 1.01 | 0.74 | 0.74 | 0.98 | 0.97 | 0.78 | 0.77 | 0.75 | 0.75 | 0.85 | 0.85 | 0.85 | 0.85 | 50.25  | 9.09 |
| Q8BGN5   | NIPA-like protein 3<br>OS=Mus musculus<br>GN=Nipal3 PE=2<br>SV=1 -<br>[NPAL3_MOUSE]                                                         | 2.20  | 1 | 1  | 1  | 2  | 1.00 | 0.96 | 0.96 | 1.02 | 1.02 | 0.75 | 0.74 | 0.75 | 0.75 | 0.82 | 0.82 | 0.83 | 0.83 | 44.78  | 7.75 |
| Q80V26   | Inositol<br>monophosphatase 3<br>OS=Mus musculus<br>GN=Impd1 PE=1<br>SV=1 -<br>[IMPA3_MOUSE]                                                | 6.18  | 1 | 2  | 2  | 3  | 0.96 | 0.78 | 0.81 | 0.94 | 0.98 | 0.72 | 0.75 | 0.76 | 0.78 | 0.72 | 0.75 | 0.69 | 0.72 | 38.59  | 6.47 |
| P13020-2 | Isoform 2 of Gelsolin<br>OS=Mus musculus<br>GN=Gsn -<br>[GELS_MOUSE]                                                                        | 28.18 | 3 | 14 | 14 | 37 | 0.90 | 0.91 | 1.04 | 0.89 | 1.02 | 0.75 | 0.83 | 0.76 | 0.90 | 0.76 | 0.84 | 0.77 | 0.87 | 80.71  | 5.76 |
| P97765   | WW domain-binding<br>protein 2 OS=Mus<br>musculus GN=Wbp2<br>PE=1 SV=1 -<br>[WBP2_MOUSE]                                                    | 38.70 | 2 | 8  | 8  | 69 | 0.92 | 0.82 | 0.89 | 0.91 | 1.00 | 0.84 | 0.85 | 0.76 | 0.85 | 0.77 | 0.78 | 0.77 | 0.83 | 28.01  | 6.33 |
| Q8BW75   | Amine oxidase [flavin-<br>containing] B OS=Mus<br>musculus GN=Maob<br>PE=1 SV=4 -<br>[AOFB_MOUSE]                                           | 37.88 | 3 | 14 | 15 | 38 | 0.97 | 0.98 | 1.01 | 1.06 | 1.08 | 0.78 | 0.79 | 0.76 | 0.74 | 0.85 | 0.86 | 0.89 | 0.94 | 58.52  | 8.29 |
| A7E1Z5   | Electrogenic Na-<br>bicarbonate<br>cotransporter splice<br>variant NBCe1-E<br>OS=Mus musculus<br>GN=Slc4a4 PE=2<br>SV=1 -<br>[A7E1Z5_MOUSE] | 19.72 | 7 | 1  | 12 | 38 | 0.85 | 1.10 | 1.29 | 1.25 | 1.46 | 1.00 | 1.16 | 0.76 | 0.88 | 0.96 | 1.12 | 0.78 | 0.92 | 120.39 | 6.84 |
| A2ASZ8-  | Isoform 4 of Calcium-<br>binding mitochondrial<br>carrier protein SCaMC-<br>2 OS=Mus musculus<br>GN=Slc25a25 -<br>[SCMC2_MOUSE]             | 11.04 | 6 | 5  | 5  | 8  | 1.10 | 1.12 | 1.04 | 1.16 | 1.13 | 0.77 | 0.66 | 0.76 | 0.75 | 0.89 | 0.73 | 0.94 | 0.80 | 54.56  | 8.63 |
| Q8BU30   | Isoleucine--tRNA<br>ligase, cytoplasmic<br>OS=Mus musculus<br>GN=lars PE=2 SV=2 -<br>[SYIC_MOUSE]                                           | 10.22 | 2 | 11 | 11 | 19 | 0.91 | 0.93 | 1.09 | 0.99 | 1.15 | 0.84 | 1.02 | 0.76 | 0.95 | 0.86 | 1.05 | 0.86 | 0.99 | 144.18 | 6.55 |

|        |                                                                                                                                                  |       |   |   |    |     |      |      |      |      |      |      |      |      |      |      |      |      |      |        |      |
|--------|--------------------------------------------------------------------------------------------------------------------------------------------------|-------|---|---|----|-----|------|------|------|------|------|------|------|------|------|------|------|------|------|--------|------|
| Q69Z99 | Zinc finger protein 512<br>OS=Mus musculus<br>GN=Znf512 PE=2<br>SV=2 -<br>[ZNF512_MOUSE]                                                         | 5.69  | 1 | 2 | 2  | 6   | 0.81 | 1.07 | 1.15 | 1.08 | 1.14 | 0.75 | 0.84 | 0.76 | 0.88 | 0.89 | 0.94 | 0.84 | 0.89 | 63.87  | 9.51 |
| Q9ERI6 | Retinol dehydrogenase<br>14 OS=Mus musculus<br>GN=Rdh14 PE=1<br>SV=1 -<br>[RDH14_MOUSE]                                                          | 29.64 | 1 | 7 | 7  | 13  | 0.95 | 1.08 | 1.13 | 1.11 | 1.16 | 0.88 | 0.96 | 0.76 | 0.88 | 0.85 | 0.98 | 0.99 | 0.99 | 36.34  | 8.18 |
| Q8JZK9 | Hydroxymethylglutaryl-<br>CoA synthase,<br>cytoplasmic OS=Mus<br>musculus GN=Hmgcs1<br>PE=1 SV=1 -<br>[HMCS1_MOUSE]                              | 19.04 | 2 | 7 | 7  | 19  | 0.93 | 0.88 | 0.95 | 0.94 | 1.01 | 0.86 | 0.93 | 0.76 | 0.82 | 0.89 | 0.93 | 0.85 | 0.95 | 57.53  | 5.99 |
| Q64310 | Surfeit locus protein 4<br>OS=Mus musculus<br>GN=Surf4 PE=2 SV=1<br>- [SURF4_MOUSE]                                                              | 3.72  | 1 | 1 | 1  | 4   | 1.02 | 1.31 | 1.29 | 1.04 | 1.02 | 0.72 | 0.71 | 0.76 | 0.74 | 0.77 | 0.76 | 0.93 | 0.92 | 30.36  | 7.78 |
| Q69ZK0 | Phosphatidylinositol<br>3,4,5-trisphosphate-<br>dependent Rac<br>exchanger 1 protein<br>OS=Mus musculus<br>GN=Prex1 PE=1 SV=2<br>- [PREX1_MOUSE] | 3.33  | 3 | 5 | 5  | 6   | 0.90 | 1.06 | 1.17 | 0.95 | 1.06 | 0.81 | 0.87 | 0.76 | 0.80 | 0.83 | 0.95 | 0.81 | 0.97 | 184.82 | 6.29 |
| H3BJ97 | Tubulointerstitial<br>nephritis antigen-like<br>OS=Mus musculus<br>GN=Tinag1 PE=2<br>SV=1 -<br>[H3BJ97_MOUSE]                                    | 19.31 | 3 | 5 | 5  | 7   | 0.94 | 1.14 | 1.21 | 1.01 | 1.07 | 0.72 | 0.79 | 0.76 | 0.80 | 0.90 | 0.90 | 0.87 | 0.87 | 49.24  | 7.15 |
| Q61024 | Asparagine synthetase<br>[glutamine-<br>hydrolyzing] OS=Mus<br>musculus GN=Asns<br>PE=2 SV=3 -<br>[ASNS_MOUSE]                                   | 14.44 | 2 | 5 | 5  | 9   | 0.86 | 0.79 | 0.91 | 1.09 | 1.25 | 0.84 | 0.95 | 0.76 | 0.88 | 0.92 | 1.02 | 0.97 | 1.09 | 64.24  | 6.58 |
| Q3UN70 | Myelin regulatory<br>factor-like protein<br>OS=Mus musculus<br>GN=Myrf1 PE=2 SV=1<br>- [MRFL_MOUSE]                                              | 1.77  | 1 | 1 | 1  | 1   | 1.42 | 1.27 | 0.89 | 1.31 | 0.92 | 1.23 | 0.86 | 0.76 | 0.53 | 1.19 | 0.84 | 0.99 | 0.70 | 101.62 | 7.27 |
| P63328 | Serine/threonine-<br>protein phosphatase 2B<br>catalytic subunit alpha<br>isoform OS=Mus<br>musculus GN=Ppp3ca<br>PE=1 SV=1 -<br>[PP2BA_MOUSE]   | 51.44 | 2 | 1 | 24 | 364 | 0.97 | 0.99 | 0.94 | 0.90 | 0.93 | 0.78 | 0.74 | 0.76 | 0.70 | 0.76 | 0.71 | 0.81 | 0.81 | 58.61  | 5.86 |
| E9QAD4 | Coiled-coil domain-<br>containing protein 93<br>OS=Mus musculus<br>GN=Ccd93 PE=2<br>SV=1 -<br>[E9QAD4_MOUSE]                                     | 3.66  | 2 | 2 | 2  | 3   | 0.90 | 0.84 | 0.93 | 1.02 | 1.13 | 0.90 | 0.99 | 0.76 | 0.84 | 0.78 | 0.86 | 1.04 | 1.15 | 72.43  | 8.29 |
| P23953 | Carboxylesterase 1C<br>OS=Mus musculus<br>GN=Ces1c PE=1<br>SV=4 -<br>[EST1C_MOUSE]                                                               | 9.39  | 2 | 3 | 3  | 5   | 0.81 | 1.11 | 1.37 | 0.71 | 0.87 | 0.68 | 0.84 | 0.76 | 0.94 | 1.07 | 1.32 | 0.69 | 0.86 | 61.02  | 5.06 |

|          |                                                                                                                                |       |   |    |    |     |      |      |      |      |      |      |      |      |      |      |      |      |      |        |      |
|----------|--------------------------------------------------------------------------------------------------------------------------------|-------|---|----|----|-----|------|------|------|------|------|------|------|------|------|------|------|------|------|--------|------|
| Q8V163-2 | Isoform 2 of MOB kinase activator 2 OS=Mus musculus GN=Mob2 - [MOB2_MOUSE]                                                     | 7.33  | 2 | 1  | 1  | 2   | 0.97 | 0.89 | 0.91 | 1.09 | 1.11 | 0.90 | 0.92 | 0.76 | 0.78 | 0.89 | 0.91 | 0.87 | 0.90 | 16.98  | 6.62 |
| J3QMC5   | Midasin OS=Mus musculus GN=Mdn1 PE=3 SV=1 - [J3QMC5_MOUSE]                                                                     | 0.25  | 2 | 1  | 1  | 1   | 0.85 | 0.59 | 0.70 | 0.93 | 1.09 | 0.79 | 0.93 | 0.76 | 0.89 | 0.81 | 0.96 | 0.67 | 0.79 | 629.19 | 5.73 |
| P63328-2 | Isoform 2 of Serine/threonine-protein phosphatase 2B catalytic subunit alpha isoform OS=Mus musculus GN=Ppp3ca - [PP2BA_MOUSE] | 50.49 | 2 | 1  | 24 | 331 | 1.02 | 1.17 | 1.16 | 0.93 | 0.94 | 0.80 | 0.81 | 0.76 | 0.74 | 0.77 | 0.76 | 0.82 | 0.80 | 57.58  | 6.30 |
| Q64133   | Amine oxidase [flavin-containing] A OS=Mus musculus GN=Maoa PE=1 SV=3 - [AOFA_MOUSE]                                           | 25.29 | 1 | 10 | 11 | 43  | 1.06 | 1.05 | 0.95 | 1.00 | 0.95 | 0.79 | 0.71 | 0.76 | 0.71 | 0.85 | 0.80 | 0.92 | 0.86 | 59.56  | 7.81 |
| Q9QWR8   | Alpha-N-acetylgalactosaminidase OS=Mus musculus GN=Naga PE=2 SV=2 - [NAGAB_MOUSE]                                              | 2.65  | 1 | 1  | 1  | 1   | 0.87 | 0.88 | 1.02 | 0.94 | 1.08 | 0.80 | 0.92 | 0.76 | 0.87 | 0.97 | 1.12 | 0.99 | 1.14 | 47.20  | 6.44 |
| P54731   | FAS-associated factor 1 OS=Mus musculus GN=Fat1 PE=1 SV=2 - [FAF1_MOUSE]                                                       | 9.40  | 1 | 3  | 3  | 6   | 1.13 | 1.19 | 0.96 | 1.16 | 1.03 | 1.05 | 0.94 | 0.76 | 0.67 | 1.01 | 0.96 | 0.95 | 0.85 | 73.82  | 4.86 |
| Q80TJ1-4 | Isoform 4 of Calcium-dependent secretion activator 1 OS=Mus musculus GN=Cadps - [CAPS1_MOUSE]                                  | 30.35 | 4 | 2  | 26 | 86  | 1.07 | 0.84 | 0.79 | 1.07 | 0.96 | 0.88 | 0.86 | 0.76 | 0.77 | 0.88 | 0.81 | 0.95 | 0.89 | 152.57 | 5.74 |
| P03930   | ATP synthase protein 8 OS=Mus musculus GN=Mtpt8 PE=1 SV=1 - [ATP8_MOUSE]                                                       | 23.88 | 1 | 2  | 2  | 2   | 0.81 | 0.91 | 1.12 | 0.99 | 1.22 | 0.74 | 0.91 | 0.76 | 0.94 | 0.78 | 0.97 | 0.83 | 1.04 | 7.76   | 9.88 |
| A2ADR8   | Nuclear inhibitor of protein phosphatase 1 OS=Mus musculus GN=Ppp1r8 PE=2 SV=1 - [A2ADR8_MOUSE]                                | 34.57 | 2 | 7  | 7  | 15  | 0.89 | 0.86 | 0.96 | 0.87 | 1.01 | 0.77 | 0.87 | 0.76 | 0.87 | 0.72 | 0.87 | 0.75 | 0.88 | 38.38  | 7.15 |
| Q8BH10   | Protein orai-2 OS=Mus musculus GN=Orai2 PE=2 SV=1 - [ORAI2_MOUSE]                                                              | 2.80  | 1 | 1  | 1  | 1   | 1.00 | 0.93 | 0.92 | 1.07 | 1.07 | 0.86 | 0.85 | 0.76 | 0.76 | 0.80 | 0.80 | 0.77 | 0.77 | 28.18  | 7.94 |
| Q9D0M1   | Phosphoribosyl pyrophosphate synthase associated protein 1 OS=Mus musculus GN=Prpsap1 PE=1 SV=1 - [KPRA_MOUSE]                 | 22.19 | 4 | 2  | 5  | 10  | 0.91 | 0.80 | 0.88 | 0.92 | 1.01 | 0.85 | 0.93 | 0.76 | 0.83 | 0.78 | 0.86 | 0.87 | 0.95 | 39.41  | 7.20 |
| Q3URS9-  | Isoform 2 of Coiled-coil domain-containing protein 51 OS=Mus musculus GN=Ccdc51 - [CCD51_MOUSE]                                | 5.87  | 2 | 2  | 2  | 6   | 1.24 | 1.31 | 0.99 | 1.37 | 1.11 | 0.81 | 0.65 | 0.76 | 0.62 | 1.03 | 0.80 | 0.90 | 0.81 | 41.74  | 7.56 |

|          |                                                                                                                        |       |   |    |    |    |      |      |      |      |      |      |      |      |      |      |      |      |      |        |      |
|----------|------------------------------------------------------------------------------------------------------------------------|-------|---|----|----|----|------|------|------|------|------|------|------|------|------|------|------|------|------|--------|------|
| E9Q1V2   | Copine-5 (Fragment)<br>OS=Mus musculus<br>GN=Cpne5 PE=2<br>SV=1 -<br>[E9Q1V2_MOUSE]                                    | 50.47 | 2 | 2  | 8  | 18 | 0.84 | 1.20 | 1.43 | 1.10 | 1.32 | 0.79 | 0.86 | 0.76 | 0.92 | 0.86 | 0.97 | 0.86 | 0.93 | 23.69  | 5.11 |
| D3YWG2   | Chitinase domain-<br>containing protein 1<br>(Fragment) OS=Mus<br>musculus GN=Chid1<br>PE=2 SV=1 -<br>[D3YWG2_MOUSE]   | 17.49 | 4 | 4  | 4  | 7  | 1.04 | 1.15 | 1.05 | 0.97 | 0.94 | 0.92 | 0.91 | 0.76 | 0.80 | 0.88 | 0.81 | 0.82 | 0.83 | 29.99  | 6.96 |
| Q91XB7   | Protein YIF1A<br>OS=Mus musculus<br>GN=Yif1a PE=2 SV=1<br>- [YIF1A_MOUSE]                                              | 10.24 | 1 | 1  | 1  | 1  | 2.04 | 0.79 | 0.38 | 0.83 | 0.40 | 0.89 | 0.43 | 0.76 | 0.37 | 0.71 | 0.35 | 0.71 | 0.35 | 32.11  | 9.09 |
| Q3TH73   | Protein tweety homolog<br>2 OS=Mus musculus<br>GN=Tyh2 PE=2 SV=1<br>- [TTYH2_MOUSE]                                    | 4.89  | 2 | 1  | 2  | 8  | 1.31 | 1.27 | 0.96 | 1.33 | 1.01 | 0.96 | 0.73 | 0.76 | 0.58 | 1.01 | 0.77 | 1.22 | 0.93 | 58.97  | 6.07 |
| G5E8T9   | Hydroxacyl<br>glutathione hydrolase<br>OS=Mus musculus<br>GN=Hagh PE=3 SV=1<br>- [G5E8T9_MOUSE]                        | 36.89 | 8 | 9  | 9  | 46 | 0.93 | 0.81 | 0.82 | 0.82 | 0.89 | 0.65 | 0.69 | 0.76 | 0.83 | 0.65 | 0.69 | 0.68 | 0.72 | 34.08  | 7.94 |
| P70451-4 | Isoform 4 of Tyrosine-<br>protein kinase Fer<br>OS=Mus musculus<br>GN=Fer -<br>[FER_MOUSE]                             | 2.65  | 4 | 1  | 1  | 2  | 0.89 | 0.78 | 0.87 | 0.90 | 1.01 | 0.76 | 0.85 | 0.76 | 0.85 | 0.73 | 0.82 | 0.81 | 0.90 | 51.57  | 8.32 |
| Q61838   | Alpha-2-macroglobulin<br>OS=Mus musculus<br>GN=A2m PE=1 SV=3 -<br>[A2M_MOUSE]                                          | 3.48  | 3 | 4  | 4  | 10 | 0.82 | 1.00 | 1.27 | 0.52 | 0.66 | 0.68 | 0.85 | 0.76 | 0.96 | 0.96 | 1.08 | 0.58 | 0.77 | 165.75 | 6.68 |
| Q55UC9   | Protein SCO1<br>homolog,<br>mitochondrial OS=Mus<br>musculus GN=Sco1<br>PE=2 SV=1 -<br>[SCO1_MOUSE]                    | 13.03 | 2 | 3  | 3  | 5  | 0.90 | 0.80 | 0.88 | 0.94 | 1.05 | 0.82 | 0.93 | 0.76 | 1.14 | 0.76 | 0.98 | 0.65 | 0.73 | 31.60  | 8.47 |
| P70207   | Plexin-A2 OS=Mus<br>musculus GN=Pkn2<br>PE=1 SV=2 -<br>[PLXA2_MOUSE]                                                   | 10.67 | 1 | 9  | 17 | 30 | 1.03 | 1.07 | 1.03 | 1.00 | 1.01 | 0.78 | 0.79 | 0.76 | 0.80 | 0.83 | 0.83 | 0.93 | 1.04 | 211.40 | 6.54 |
| P24529   | Tyrosine 3-<br>monooxygenase<br>OS=Mus musculus<br>GN=Th PE=1 SV=3 -<br>[TY3H_MOUSE]                                   | 14.46 | 4 | 5  | 5  | 10 | 1.00 | 1.16 | 1.13 | 1.44 | 1.51 | 0.99 | 0.99 | 0.76 | 0.75 | 1.40 | 1.19 | 1.81 | 1.71 | 55.96  | 6.15 |
| Q8R1B4   | Eukaryotic translation<br>initiation factor 3<br>subunit C OS=Mus<br>musculus GN=EIF3c<br>PE=1 SV=1 -<br>[EIF3C_MOUSE] | 19.21 | 1 | 14 | 14 | 38 | 1.05 | 0.92 | 0.83 | 1.07 | 0.98 | 0.79 | 0.77 | 0.76 | 0.75 | 0.83 | 0.81 | 0.83 | 0.85 | 105.46 | 5.78 |
| Q91YS8   | Calcium/calmodulin-<br>dependent protein<br>kinase type 1 OS=Mus<br>musculus GN=Camk1<br>PE=1 SV=1 -<br>[KCC1A_MOUSE]  | 31.02 | 2 | 6  | 9  | 29 | 1.01 | 0.73 | 0.74 | 0.89 | 0.99 | 0.78 | 0.74 | 0.76 | 0.75 | 0.73 | 0.72 | 0.68 | 0.75 | 41.60  | 5.35 |



|          |                                                                                                       |       |   |   |    |     |      |      |      |      |      |      |      |      |      |      |      |      |      |       |       |
|----------|-------------------------------------------------------------------------------------------------------|-------|---|---|----|-----|------|------|------|------|------|------|------|------|------|------|------|------|------|-------|-------|
| Q91V09   | WD repeat-containing protein 13 OS=Mus musculus GN=Wdr13 PE=1 SV=1 - [WDR13_MOUSE]                    | 26.60 | 2 | 9 | 9  | 27  | 0.99 | 1.09 | 1.05 | 0.92 | 0.91 | 0.69 | 0.66 | 0.76 | 0.73 | 0.71 | 0.72 | 0.69 | 0.70 | 53.63 | 9.14  |
| Q6KAU4   | Multivesicular body subunit 12B OS=Mus musculus GN=Mvb12b PE=2 SV=2 - [MB12B_MOUSE]                   | 3.47  | 1 | 1 | 1  | 4   | 0.86 | 0.94 | 1.09 | 0.91 | 1.06 | 0.86 | 1.00 | 0.76 | 0.89 | 0.84 | 0.99 | 0.95 | 1.11 | 35.39 | 7.93  |
| Q80ZJ6-2 | Isoform 2 of Protein zero 1 homolog OS=Mus musculus GN=Zer1 - [ZER1_MOUSE]                            | 4.57  | 3 | 3 | 3  | 3   | 0.78 | 0.83 | 1.07 | 0.89 | 1.12 | 0.92 | 0.97 | 0.76 | 0.81 | 0.82 | 1.04 | 0.89 | 1.02 | 87.68 | 5.80  |
| O88507   | Ciliary neurotrophic factor receptor subunit alpha OS=Mus musculus GN=Cntrf PE=1 SV=2 - [CNTFR_MOUSE] | 19.09 | 1 | 5 | 5  | 21  | 1.13 | 0.98 | 0.81 | 1.00 | 0.84 | 0.75 | 0.72 | 0.77 | 0.71 | 0.75 | 0.61 | 0.93 | 0.83 | 40.78 | 6.83  |
| O08599   | Syntaxin-binding protein 1 OS=Mus musculus GN=Stxbp1 PE=1 SV=2 - [STXB1_MOUSE]                        | 76.26 | 1 | 3 | 45 | 493 | 0.80 | 0.77 | 0.79 | 1.04 | 1.31 | 0.94 | 1.20 | 0.77 | 0.87 | 0.75 | 0.95 | 1.24 | 1.17 | 67.53 | 6.96  |
| H7BxB9   | Protein 1700037H04Rik (Fragment) OS=Mus musculus GN=1700037H04Rik PE=2 SV=1 - [H7BxB9_MOUSE]          | 9.93  | 3 | 1 | 1  | 4   | 1.00 | 0.78 | 0.78 | 0.89 | 0.89 | 0.80 | 0.79 | 0.77 | 0.77 | 0.83 | 0.83 | 1.16 | 1.17 | 15.76 | 8.32  |
| Q3UN10   | Wolframin OS=Mus musculus GN=Wfs1 PE=2 SV=1 - [Q3UN10_MOUSE]                                          | 5.53  | 3 | 4 | 4  | 14  | 1.13 | 0.93 | 0.80 | 1.14 | 0.94 | 0.86 | 0.85 | 0.77 | 0.81 | 1.02 | 0.96 | 1.14 | 1.07 | 91.76 | 7.99  |
| B1AY64   | MCG1034295, isoform CRA_a OS=Mus musculus GN=Cypt3 PE=4 SV=1 - [B1AY64_MOUSE]                         | 3.45  | 1 | 1 | 1  | 1   | 1.08 | 0.81 | 0.75 | 0.94 | 0.87 | 0.93 | 0.85 | 0.77 | 0.71 | 1.05 | 0.97 | 0.67 | 0.62 | 19.51 | 10.56 |
| Q8BFQ4   | WD repeat-containing protein 82 OS=Mus musculus GN=Wdr82 PE=1 SV=1 - [WDR82_MOUSE]                    | 6.39  | 1 | 1 | 1  | 1   | 1.06 | 0.95 | 0.90 | 0.94 | 0.89 | 0.60 | 0.56 | 0.77 | 0.72 | 0.73 | 0.69 | 0.50 | 0.47 | 35.06 | 7.69  |
| P53994   | Ras-related protein Rab2A OS=Mus musculus GN=Rab2a PE=1 SV=1 - [RAB2A_MOUSE]                          | 71.23 | 3 | 7 | 14 | 95  | 1.01 | 0.94 | 0.93 | 0.92 | 0.99 | 0.82 | 0.80 | 0.77 | 0.77 | 0.80 | 0.81 | 0.79 | 0.82 | 23.53 | 6.54  |
| H7Bx88   | Carnitine O-acetyltransferase OS=Mus musculus GN=Crat PE=2 SV=1 - [H7Bx88_MOUSE]                      | 7.60  | 4 | 4 | 4  | 8   | 0.96 | 0.85 | 0.86 | 0.86 | 0.90 | 0.83 | 0.79 | 0.77 | 0.78 | 0.79 | 0.81 | 0.88 | 0.89 | 68.60 | 8.07  |
| Q62056   | MCG130054 OS=Mus musculus GN=Psg17 PE=2 SV=1 - [Q62056_MOUSE]                                         | 3.58  | 1 | 1 | 1  | 1   | 0.95 | 0.86 | 0.90 | 1.01 | 1.06 | 0.79 | 0.83 | 0.77 | 0.80 | 0.85 | 0.89 | 0.82 | 0.86 | 52.88 | 7.44  |

|        |                                                                                                           |       |   |    |    |     |      |      |      |      |      |      |      |      |      |      |      |      |      |       |       |
|--------|-----------------------------------------------------------------------------------------------------------|-------|---|----|----|-----|------|------|------|------|------|------|------|------|------|------|------|------|------|-------|-------|
| P14148 | 60S ribosomal protein L7 OS=Mus musculus GN=Rpl7 PE=2 SV=2 - [RL7_MOUSE]                                  | 40.37 | 2 | 11 | 11 | 21  | 1.02 | 0.83 | 0.76 | 1.00 | 1.02 | 0.97 | 0.93 | 0.77 | 0.77 | 0.89 | 0.86 | 0.98 | 0.96 | 31.40 | 10.89 |
| Q9LJ2  | 4-trimethylaminobutyraldehyde dehydrogenase OS=Mus musculus GN=Aldh9a1 PE=1 SV=1 - [AL9A1_MOUSE]          | 27.33 | 2 | 11 | 11 | 20  | 1.03 | 0.88 | 0.84 | 1.08 | 1.02 | 0.89 | 0.85 | 0.77 | 0.70 | 0.89 | 0.87 | 0.89 | 0.89 | 53.48 | 6.98  |
| Q9CWR0 | Isoform 2 of Rho guanine nucleotide exchange factor 25 OS=Mus musculus GN=Arhgef25 - [ARHGP_MOUSE]        | 3.45  | 3 | 1  | 1  | 1   | 1.08 | 3.47 | 3.20 | 1.10 | 1.01 | 1.09 | 1.00 | 0.77 | 0.71 | 0.79 | 0.73 | 0.89 | 0.82 | 67.41 | 5.19  |
| Q8BGA3 | Leucine-rich repeat transmembrane neuronal protein 2 OS=Mus musculus GN=Lrrtm2 PE=2 SV=1 - [LRRT2_MOUSE]  | 5.24  | 1 | 3  | 3  | 5   | 1.06 | 0.84 | 0.78 | 1.04 | 1.11 | 0.78 | 0.73 | 0.77 | 0.72 | 0.80 | 0.76 | 0.81 | 0.85 | 58.78 | 8.00  |
| Q3TJ22 | Angio-associated migratory protein OS=Mus musculus GN=Aamp PE=2 SV=1 - [Q3TJ22_MOUSE]                     | 4.14  | 2 | 2  | 2  | 3   | 0.99 | 1.00 | 1.02 | 0.93 | 0.94 | 0.78 | 0.79 | 0.77 | 0.78 | 0.77 | 0.78 | 0.79 | 0.80 | 46.87 | 4.41  |
| P26048 | Gamma-aminobutyric acid receptor subunit alpha-2 OS=Mus musculus GN=Gabra2 PE=1 SV=1 - [GBRA2_MOUSE]      | 10.86 | 2 | 2  | 5  | 10  | 1.25 | 1.16 | 0.93 | 0.96 | 0.77 | 0.89 | 0.71 | 0.77 | 0.61 | 0.89 | 0.71 | 0.92 | 0.74 | 51.11 | 9.06  |
| P29341 | Polyadenylate-binding protein 1 OS=Mus musculus GN=Pabpc1 PE=1 SV=2 - [PABP1_MOUSE]                       | 39.31 | 4 | 15 | 23 | 62  | 0.94 | 0.79 | 0.84 | 0.87 | 0.97 | 0.77 | 0.82 | 0.77 | 0.83 | 0.75 | 0.87 | 0.82 | 0.85 | 70.63 | 9.50  |
| P56387 | Dynein light chain Tctex-type 3 OS=Mus musculus GN=Dyntl3 PE=1 SV=1 - [DYLT3_MOUSE]                       | 8.62  | 1 | 1  | 1  | 4   | 1.14 | 1.24 | 1.09 | 1.10 | 0.97 | 0.64 | 0.56 | 0.77 | 0.67 | 0.70 | 0.61 | 0.89 | 0.79 | 12.95 | 5.12  |
| Q9QYG0 | Isoform 2 of Protein NDRG2 OS=Mus musculus GN=Ndr2 - [NDRG2_MOUSE]                                        | 67.79 | 1 | 1  | 14 | 119 | 0.79 | 0.87 | 1.10 | 1.04 | 1.32 | 0.75 | 0.94 | 0.77 | 0.97 | 0.94 | 1.19 | 0.99 | 1.26 | 39.26 | 5.63  |
| Q9D1C8 | Vacuolar protein sorting-associated protein 28 homolog OS=Mus musculus GN=Vps28 PE=2 SV=1 - [VPS28_MOUSE] | 50.68 | 1 | 8  | 8  | 15  | 0.95 | 1.07 | 1.14 | 1.03 | 1.04 | 0.76 | 0.83 | 0.77 | 0.81 | 0.75 | 0.83 | 0.87 | 0.86 | 25.44 | 5.54  |

|        |                                                                                                                          |       |   |    |    |     |      |      |      |      |      |      |      |      |      |      |      |      |      |        |       |
|--------|--------------------------------------------------------------------------------------------------------------------------|-------|---|----|----|-----|------|------|------|------|------|------|------|------|------|------|------|------|------|--------|-------|
| B1B0C7 | Basement membrane-specific heparan sulfate proteoglycan core protein OS=Mus musculus GN=Hspg2 PE=2 SV=1 - [B1B0C7_MOUSE] | 10.51 | 3 | 31 | 31 | 57  | 0.86 | 1.04 | 1.17 | 0.89 | 1.02 | 0.73 | 0.77 | 0.77 | 0.87 | 0.80 | 0.87 | 0.75 | 0.83 | 468.73 | 6.48  |
| Q9DBX3 | Sushi domain-containing protein 2 OS=Mus musculus GN=Susd2 PE=1 SV=1 - [SUSD2_MOUSE]                                     | 6.34  | 3 | 4  | 4  | 6   | 1.10 | 1.10 | 1.01 | 1.02 | 0.91 | 0.81 | 0.74 | 0.77 | 0.70 | 0.95 | 0.87 | 0.90 | 0.82 | 90.58  | 6.62  |
| Q61503 | 5'-nucleotidase OS=Mus musculus GN=Nt5e PE=1 SV=2 - [SNTD_MOUSE]                                                         | 11.46 | 1 | 5  | 5  | 9   | 1.05 | 0.98 | 0.80 | 1.11 | 1.02 | 0.87 | 0.86 | 0.77 | 0.73 | 0.91 | 0.86 | 1.04 | 0.99 | 63.82  | 6.64  |
| D3YVB6 | Ketohexokinase (Fragment) OS=Mus musculus GN=Khk PE=2 SV=1 - [D3YVB6_MOUSE]                                              | 3.28  | 1 | 1  | 1  | 1   | 0.96 | 1.18 | 1.23 | 0.97 | 1.02 | 0.80 | 0.83 | 0.77 | 0.80 | 0.87 | 0.91 | 1.10 | 1.16 | 27.19  | 6.23  |
| Q9D1R9 | 60S ribosomal protein L34 OS=Mus musculus GN=Rpl34 PE=3 SV=2 - [RL34_MOUSE]                                              | 15.38 | 2 | 2  | 2  | 6   | 0.96 | 0.82 | 0.86 | 1.11 | 1.10 | 0.87 | 0.90 | 0.77 | 0.77 | 0.89 | 0.90 | 0.92 | 0.91 | 13.28  | 11.47 |
| Q99KK7 | Dipeptidyl peptidase 3 OS=Mus musculus GN=Dpp3 PE=2 SV=2 - [DPP3_MOUSE]                                                  | 24.12 | 1 | 11 | 11 | 18  | 0.98 | 0.88 | 0.93 | 1.01 | 1.03 | 0.86 | 0.83 | 0.77 | 0.77 | 0.86 | 0.77 | 0.91 | 0.94 | 82.85  | 5.38  |
| P56376 | Acylphosphatase-1 OS=Mus musculus GN=Acyp1 PE=2 SV=2 - [ACYP1_MOUSE]                                                     | 66.67 | 2 | 9  | 9  | 18  | 0.97 | 0.76 | 0.75 | 0.88 | 0.95 | 0.72 | 0.75 | 0.77 | 0.78 | 0.63 | 0.74 | 0.63 | 0.74 | 11.23  | 9.04  |
| Q6P6M7 | O-phosphoryl-rRNA(Sec) selenium transferase OS=Mus musculus GN=Sepsecs PE=1 SV=2 - [SPCS_MOUSE]                          | 7.74  | 4 | 3  | 3  | 7   | 1.07 | 0.88 | 0.72 | 0.96 | 0.90 | 0.88 | 0.89 | 0.77 | 0.67 | 0.83 | 0.68 | 0.92 | 0.75 | 55.29  | 8.06  |
| Q8R033 | LYR motif-containing protein 2 OS=Mus musculus GN=Lym2 PE=2 SV=1 - [LYRM2_MOUSE]                                         | 10.23 | 1 | 1  | 1  | 2   | 1.00 | 1.28 | 1.29 | 0.87 | 0.87 | 0.74 | 0.74 | 0.77 | 0.77 | 0.72 | 0.73 | 0.73 | 0.73 | 10.37  | 10.40 |
| Q8R016 | Bleomycin hydrolase OS=Mus musculus GN=Blmh PE=2 SV=1 - [BLMH_MOUSE]                                                     | 23.30 | 5 | 8  | 8  | 17  | 1.00 | 0.93 | 0.95 | 1.02 | 0.98 | 0.90 | 0.87 | 0.77 | 0.78 | 0.91 | 0.78 | 1.03 | 0.91 | 52.48  | 6.48  |
| Q5SYL3 | UPF0378 protein KIAA0100 OS=Mus musculus GN=Kiaa0100 PE=2 SV=1 - [K0100_MOUSE]                                           | 0.54  | 1 | 1  | 1  | 1   | 0.90 | 1.18 | 1.31 | 0.83 | 0.93 | 0.75 | 0.84 | 0.77 | 0.86 | 0.82 | 0.91 | 0.94 | 1.05 | 254.31 | 7.34  |
| Q9QYB5 | Isoform 1 of Gamma-adducin OS=Mus musculus GN=Add3 - [ADDG_MOUSE]                                                        | 36.94 | 1 | 1  | 19 | 166 | 0.86 | 0.55 | 0.64 | 0.86 | 1.00 | 0.78 | 0.90 | 0.77 | 0.89 | 0.82 | 0.96 | 0.68 | 0.79 | 75.36  | 6.34  |

|        |                                                                                                        |       |    |    |    |    |      |      |      |      |      |      |      |      |      |      |      |      |      |        |      |
|--------|--------------------------------------------------------------------------------------------------------|-------|----|----|----|----|------|------|------|------|------|------|------|------|------|------|------|------|------|--------|------|
| Q9D0R2 | Threonine--tRNA ligase, cytoplasmic OS=Mus musculus GN=Tars PE=1 SV=2 - [SYTC_MOUSE]                   | 20.50 | 1  | 12 | 12 | 28 | 1.00 | 0.92 | 0.91 | 1.01 | 1.01 | 0.82 | 0.80 | 0.77 | 0.75 | 0.82 | 0.82 | 0.86 | 0.82 | 83.30  | 7.36 |
| Q9ET30 | Transmembrane 9 superfamily member 3 OS=Mus musculus GN=Tm9s3 PE=1 SV=1 - [TM9S3_MOUSE]                | 3.58  | 1  | 2  | 2  | 3  | 1.04 | 1.01 | 0.96 | 1.27 | 1.21 | 0.91 | 0.86 | 0.77 | 0.74 | 0.89 | 0.85 | 0.89 | 0.85 | 67.50  | 7.21 |
| P61027 | Ras-related protein Rab10 OS=Mus musculus GN=Rab10 PE=1 SV=1 - [RAB10_MOUSE]                           | 40.00 | 11 | 5  | 8  | 72 | 1.02 | 1.03 | 1.07 | 1.01 | 0.98 | 0.85 | 0.84 | 0.77 | 0.75 | 0.80 | 0.83 | 0.89 | 0.88 | 22.53  | 8.38 |
| Q9D4H1 | Exocyst complex component 2 OS=Mus musculus GN=Exoc2 PE=1 SV=1 - [EXOC2_MOUSE]                         | 7.90  | 1  | 6  | 6  | 12 | 0.98 | 1.20 | 1.25 | 1.13 | 1.15 | 0.84 | 0.88 | 0.77 | 0.82 | 0.90 | 0.90 | 1.00 | 0.99 | 103.89 | 7.18 |
| P10493 | Nidogen-1 OS=Mus musculus GN=Nid1 PE=1 SV=2 - [NID1_MOUSE]                                             | 10.12 | 1  | 11 | 11 | 19 | 0.93 | 0.96 | 0.98 | 0.89 | 0.99 | 0.74 | 0.86 | 0.77 | 0.84 | 0.81 | 0.84 | 0.72 | 0.76 | 136.45 | 5.44 |
| Q3TFD2 | Isoform 3 of Lysophosphatidylcholine acyltransferase 1 OS=Mus musculus GN=Lpcat1 - [PCAT1_MOUSE]       | 3.63  | 3  | 1  | 1  | 1  | 1.23 | 1.26 | 1.02 | 1.40 | 1.13 | 0.95 | 0.77 | 0.77 | 0.63 | 1.02 | 0.83 | 1.26 | 1.02 | 36.96  | 4.65 |
| P29758 | Ornithine aminotransferase, mitochondrial OS=Mus musculus GN=Oat PE=1 SV=1 - [OAT_MOUSE]               | 49.89 | 1  | 15 | 15 | 40 | 1.10 | 0.97 | 0.92 | 1.05 | 0.97 | 0.73 | 0.67 | 0.77 | 0.73 | 0.79 | 0.76 | 0.77 | 0.75 | 48.32  | 6.62 |
| Q6P5P9 | Exportin-1 OS=Mus musculus GN=Xpo1 PE=1 SV=1 - [XPO1_MOUSE]                                            | 11.02 | 3  | 8  | 8  | 16 | 0.96 | 0.89 | 0.94 | 1.08 | 1.09 | 0.90 | 0.89 | 0.77 | 0.78 | 0.91 | 0.93 | 1.03 | 1.02 | 123.01 | 6.07 |
| D3Z041 | Long-chain-fatty-acid--CoA ligase 1 OS=Mus musculus GN=Acs11 PE=2 SV=1 - [D3Z041_MOUSE]                | 11.73 | 4  | 6  | 7  | 13 | 0.93 | 0.84 | 0.98 | 1.07 | 1.09 | 0.83 | 0.84 | 0.78 | 0.79 | 0.87 | 0.92 | 0.88 | 0.92 | 77.98  | 7.47 |
| Q8VE62 | Polyadenylate-binding protein-interacting protein 1 OS=Mus musculus GN=Paip1 PE=2 SV=1 - [PAIP1_MOUSE] | 20.50 | 5  | 1  | 8  | 19 | 0.97 | 0.75 | 0.78 | 0.96 | 0.99 | 0.91 | 0.93 | 0.78 | 0.80 | 0.80 | 0.83 | 0.84 | 0.87 | 45.67  | 4.55 |
| Q62351 | Transferrin receptor protein 1 OS=Mus musculus GN=Tfrc PE=1 SV=1 - [TFR1_MOUSE]                        | 18.09 | 2  | 11 | 11 | 20 | 1.00 | 1.16 | 1.06 | 0.98 | 0.95 | 0.78 | 0.90 | 0.78 | 0.76 | 0.85 | 0.93 | 0.87 | 0.86 | 85.68  | 6.57 |
| Q80TQ2 | Ubiquitin carboxyl-terminal hydrolase CYLD OS=Mus musculus GN=Cyld PE=1 SV=2 - [CYLD_MOUSE]            | 7.35  | 3  | 6  | 6  | 10 | 0.95 | 0.89 | 0.89 | 1.07 | 1.21 | 0.89 | 0.95 | 0.78 | 0.83 | 0.93 | 0.99 | 1.04 | 1.11 | 106.52 | 5.63 |

|          |                                                                                                                                    |       |   |    |    |     |      |      |      |      |      |      |      |      |      |      |      |      |      |        |      |
|----------|------------------------------------------------------------------------------------------------------------------------------------|-------|---|----|----|-----|------|------|------|------|------|------|------|------|------|------|------|------|------|--------|------|
| O70152   | Dolichol-phosphate<br>mannosyltransferase<br>OS=Mus musculus<br>GN=Dpm1 PE=2<br>SV=1 -<br>[DPM1_MOUSE]                             | 14.23 | 3 | 3  | 3  | 6   | 0.85 | 1.07 | 1.44 | 1.03 | 1.18 | 0.83 | 1.05 | 0.78 | 0.96 | 0.85 | 1.10 | 0.96 | 1.14 | 29.16  | 9.51 |
| P00397   | Cytochrome c oxidase<br>subunit 1 OS=Mus<br>musculus GN=Mtco1<br>PE=3 SV=1 -<br>[COX1_MOUSE]                                       | 6.23  | 2 | 1  | 1  | 2   | 1.28 | 0.94 | 0.73 | 1.51 | 1.18 | 1.02 | 0.80 | 0.78 | 0.61 | 0.88 | 0.69 | 1.28 | 1.00 | 56.82  | 6.70 |
| Q9D7X3   | Dual specificity protein<br>phosphatase 3<br>OS=Mus musculus<br>GN=Dusp3 PE=1<br>SV=1 -<br>[DUS3_MOUSE]                            | 42.16 | 5 | 6  | 6  | 36  | 0.85 | 0.96 | 1.16 | 1.00 | 1.20 | 0.75 | 0.89 | 0.78 | 0.89 | 0.71 | 0.83 | 0.72 | 0.87 | 20.46  | 6.54 |
| Q922X2   | 26S proteasome non-<br>ATPase regulatory<br>subunit 10 OS=Mus<br>musculus GN=Psm10<br>PE=1 SV=3 -<br>[PSD10_MOUSE]                 | 7.79  | 1 | 2  | 2  | 3   | 1.06 | 1.11 | 1.04 | 0.99 | 0.93 | 0.72 | 0.67 | 0.78 | 0.73 | 0.76 | 0.72 | 0.92 | 0.87 | 25.07  | 6.06 |
| Q922S4   | cGMP-dependent 3',5'-<br>cyclic<br>phosphodiesterase<br>OS=Mus musculus<br>GN=Pde2a PE=1<br>SV=3 -<br>[PDE2A_MOUSE]                | 31.11 | 3 | 18 | 18 | 45  | 1.02 | 1.04 | 1.01 | 1.22 | 1.12 | 0.86 | 0.81 | 0.78 | 0.77 | 1.00 | 0.99 | 1.08 | 1.03 | 103.18 | 5.38 |
| O35683   | NADH dehydrogenase<br>[ubiquinone] 1 alpha<br>subcomplex subunit 1<br>OS=Mus musculus<br>GN=Ndufa1 PE=2<br>SV=1 -<br>[NDUA1_MOUSE] | 14.29 | 1 | 1  | 1  | 2   | 0.95 | 1.16 | 1.23 | 0.96 | 1.01 | 0.65 | 0.68 | 0.78 | 0.82 | 0.79 | 0.84 | 0.89 | 0.94 | 8.13   | 9.48 |
| Q64516-1 | Isoform 1 of Glycerol<br>kinase OS=Mus<br>musculus GN=Gk -<br>[GLPK_MOUSE]                                                         | 9.54  | 5 | 5  | 5  | 11  | 1.05 | 1.07 | 1.08 | 1.18 | 1.13 | 0.83 | 0.81 | 0.78 | 0.78 | 0.80 | 0.83 | 0.89 | 0.89 | 57.42  | 5.64 |
| Q8R4E6   | Purine-rich element-<br>binding protein gamma<br>OS=Mus musculus<br>GN=Purg PE=1 SV=1 -<br>[PURG_MOUSE]                            | 18.00 | 2 | 4  | 7  | 10  | 0.87 | 0.97 | 0.94 | 0.97 | 1.11 | 0.82 | 0.79 | 0.78 | 0.90 | 0.84 | 0.88 | 0.83 | 0.90 | 39.91  | 9.51 |
| Q5NCF2   | Trafficking protein<br>particle complex<br>subunit 1 OS=Mus<br>musculus GN=Trappc1<br>PE=1 SV=1 -<br>[TPPC1_MOUSE]                 | 12.41 | 3 | 2  | 2  | 2   | 1.21 | 1.44 | 1.19 | 0.98 | 0.81 | 0.82 | 0.67 | 0.78 | 0.64 | 0.86 | 0.72 | 0.88 | 0.73 | 16.87  | 9.16 |
| Q8C7D2-  | Isoform 2 of Protein<br>cereblon OS=Mus<br>musculus GN=Crbn -<br>[CRBN_MOUSE]                                                      | 9.05  | 3 | 2  | 2  | 4   | 1.01 | 0.90 | 0.89 | 1.07 | 1.06 | 0.97 | 0.96 | 0.78 | 0.77 | 0.95 | 0.95 | 0.99 | 0.98 | 49.45  | 5.45 |
| Q91VT4   | Carbonyl reductase<br>family member 4<br>OS=Mus musculus<br>GN=Cbr4 PE=2 SV=2 -<br>[CBR4_MOUSE]                                    | 9.75  | 2 | 2  | 2  | 4   | 0.98 | 1.06 | 1.05 | 1.10 | 1.11 | 0.72 | 0.68 | 0.78 | 0.81 | 0.79 | 0.80 | 0.88 | 0.90 | 25.40  | 9.69 |
| E9Q171   | Neurofascin OS=Mus<br>musculus GN=Nfasc<br>PE=2 SV=1 -<br>[E9Q171_MOUSE]                                                           | 42.52 | 2 | 4  | 38 | 174 | 0.98 | 1.20 | 1.22 | 0.96 | 0.95 | 0.78 | 0.75 | 0.78 | 0.82 | 0.82 | 0.83 | 0.77 | 0.80 | 130.16 | 6.84 |

|          |                                                                                                                  |       |   |    |    |    |      |      |      |      |      |      |      |      |      |      |      |      |      |        |      |
|----------|------------------------------------------------------------------------------------------------------------------|-------|---|----|----|----|------|------|------|------|------|------|------|------|------|------|------|------|------|--------|------|
| A2AQ17   | Complex I intermediate-associated protein 30, mitochondrial OS=Mus musculus GN=Ndufa1 PE=4 SV=1 - [A2AQ17_MOUSE] | 6.71  | 2 | 2  | 2  | 4  | 0.88 | 0.86 | 0.98 | 0.99 | 1.13 | 0.90 | 1.02 | 0.78 | 0.88 | 0.81 | 0.93 | 0.85 | 0.97 | 37.76  | 8.60 |
| Q8BW41   | Isoform 2 of Glycosyltransferase-like domain-containing protein 2 OS=Mus musculus GN=Gtdc2 - [GTDC2_MOUSE]       | 1.72  | 2 | 1  | 1  | 2  | 1.01 | 1.31 | 1.29 | 1.09 | 1.07 | 0.84 | 0.82 | 0.78 | 0.77 | 0.92 | 0.91 | 1.00 | 0.99 | 66.62  | 8.47 |
| Q99K13   | ER membrane protein complex subunit 3 OS=Mus musculus GN=Emc3 PE=2 SV=3 - [EMC3_MOUSE]                           | 15.71 | 1 | 3  | 3  | 9  | 1.08 | 1.02 | 0.98 | 1.25 | 1.19 | 0.85 | 0.87 | 0.78 | 0.78 | 0.88 | 0.90 | 1.14 | 1.09 | 29.96  | 6.81 |
| P58281   | Dynamlin-like 120 kDa protein, mitochondrial OS=Mus musculus GN=Opa1 PE=1 SV=1 - [OPA1_MOUSE]                    | 40.00 | 5 | 33 | 33 | 91 | 0.97 | 1.09 | 1.12 | 1.23 | 1.27 | 0.79 | 0.78 | 0.78 | 0.78 | 0.84 | 0.89 | 0.92 | 0.91 | 111.27 | 7.55 |
| Q7TNB5   | Glutamate receptor 1 OS=Mus musculus GN=Gria1 PE=2 SV=1 - [Q7TNB5_MOUSE]                                         | 20.73 | 1 | 1  | 15 | 34 | 0.97 | 0.88 | 0.90 | 1.14 | 1.17 | 0.76 | 0.77 | 0.78 | 0.80 | 0.79 | 0.81 | 0.80 | 0.82 | 101.53 | 7.53 |
| Q8BIJ6   | Isoleucine--tRNA ligase, mitochondrial OS=Mus musculus GN=Iars2 PE=2 SV=1 - [SYIM_MOUSE]                         | 24.51 | 3 | 18 | 18 | 42 | 1.00 | 0.89 | 0.82 | 1.10 | 1.09 | 0.86 | 0.84 | 0.78 | 0.76 | 0.83 | 0.79 | 0.88 | 0.83 | 112.73 | 6.81 |
| Q8VCL2   | Protein SCO2 homolog, mitochondrial OS=Mus musculus GN=Sco2 PE=2 SV=1 - [SCO2_MOUSE]                             | 15.69 | 1 | 2  | 2  | 3  | 1.04 | 0.96 | 0.92 | 1.08 | 1.03 | 0.83 | 0.79 | 0.78 | 0.75 | 0.72 | 0.70 | 0.84 | 0.81 | 28.93  | 8.29 |
| Q9JL16   | Selenocysteine lyase OS=Mus musculus GN=Scly PE=1 SV=1 - [SCLY_MOUSE]                                            | 10.42 | 7 | 4  | 4  | 7  | 0.93 | 1.04 | 1.07 | 0.93 | 1.01 | 0.76 | 0.81 | 0.78 | 0.84 | 0.72 | 0.78 | 0.78 | 0.84 | 47.14  | 6.80 |
| O35435   | Dihydroorotate dehydrogenase (quinone), mitochondrial OS=Mus musculus GN=Dhodh PE=2 SV=2 - [PYRD_MOUSE]          | 18.23 | 4 | 6  | 6  | 9  | 0.99 | 1.25 | 1.19 | 0.90 | 0.96 | 0.82 | 0.89 | 0.78 | 0.79 | 0.78 | 0.85 | 0.85 | 0.88 | 42.67  | 9.55 |
| Q5Y5T1-2 | Isoform 2 of Probable palmitoyltransferase ZDHC20 OS=Mus musculus GN=Zdhhc20 - [ZDH20_MOUSE]                     | 2.99  | 2 | 1  | 1  | 2  | 0.96 | 0.83 | 0.87 | 1.00 | 1.04 | 0.88 | 0.92 | 0.78 | 0.81 | 0.88 | 0.92 | 0.85 | 0.89 | 42.53  | 8.00 |
| A2AMZ4   | Uncharacterized protein C17orf89 homolog OS=Mus musculus PE=4 SV=1 - [CQ089_MOUSE]                               | 24.32 | 1 | 1  | 1  | 1  | 0.69 | 1.08 | 1.55 | 0.78 | 1.12 | 0.87 | 1.25 | 0.78 | 1.12 | 0.69 | 1.00 | 0.88 | 1.27 | 7.78   | 9.55 |

|        |                                                                                                                             |       |   |    |    |    |      |      |      |      |      |      |      |      |      |      |      |      |      |        |      |
|--------|-----------------------------------------------------------------------------------------------------------------------------|-------|---|----|----|----|------|------|------|------|------|------|------|------|------|------|------|------|------|--------|------|
| H7BX36 | Serine/threonine-protein kinase DCLK1<br>OS=Mus musculus<br>GN=Dclk1 PE=2<br>SV=1 -<br>[H7BX36_MOUSE]                       | 35.55 | 1 | 3  | 10 | 52 | 0.93 | 1.00 | 1.07 | 0.77 | 0.82 | 0.80 | 0.85 | 0.78 | 0.83 | 0.67 | 0.72 | 0.83 | 0.89 | 46.57  | 5.85 |
| Q9Z210 | LETM1 and EF-hand domain-containing protein 1, mitochondrial<br>OS=Mus musculus<br>GN=Letm1 PE=2<br>SV=1 -<br>[LETM1_MOUSE] | 35.64 | 1 | 20 | 20 | 48 | 1.05 | 1.02 | 1.00 | 1.12 | 1.09 | 0.85 | 0.77 | 0.78 | 0.74 | 0.80 | 0.78 | 0.93 | 0.91 | 82.94  | 6.52 |
| E9QAS4 | Chromodomain-helicase-DNA-binding protein 4<br>OS=Mus musculus<br>GN=Chd4 PE=2<br>SV=1 -<br>[E9QAS4_MOUSE]                  | 1.52  | 7 | 2  | 2  | 3  | 0.77 | 0.85 | 1.09 | 0.87 | 1.12 | 0.72 | 0.93 | 0.78 | 1.00 | 0.60 | 0.78 | 0.70 | 0.91 | 216.23 | 5.92 |
| E9Q150 | Segment polarity protein dishevelled homolog DVL-3<br>OS=Mus musculus<br>GN=Dvl3 PE=2<br>SV=1 -<br>[E9Q150_MOUSE]           | 2.72  | 3 | 1  | 2  | 2  | 0.66 | 1.09 | 1.65 | 0.83 | 1.26 | 0.71 | 1.06 | 0.78 | 1.18 | 0.75 | 1.14 | 0.97 | 1.47 | 76.28  | 6.70 |
| Q80YA8 | Protein crumbs homolog 2<br>OS=Mus musculus<br>GN=Crb2 PE=2<br>SV=3 -<br>[CRUM2_MOUSE]                                      | 1.25  | 1 | 1  | 1  | 1  | 0.63 | 0.75 | 1.20 | 0.58 | 0.92 | 1.11 | 1.75 | 0.78 | 1.24 | 0.84 | 1.33 | 0.86 | 1.37 | 134.67 | 5.22 |
| Q921M3 | Splicing factor 3B subunit 3<br>OS=Mus musculus<br>GN=Sf3b3 PE=2<br>SV=1 -<br>[SF3B3_MOUSE]                                 | 23.01 | 2 | 25 | 25 | 59 | 1.04 | 1.02 | 0.99 | 0.96 | 0.92 | 0.79 | 0.76 | 0.78 | 0.77 | 0.76 | 0.72 | 0.80 | 0.77 | 135.46 | 5.26 |
| O35129 | Prohibitin-2<br>OS=Mus musculus<br>GN=Phb2 PE=1<br>SV=1 -<br>[PHB2_MOUSE]                                                   | 47.83 | 3 | 13 | 13 | 38 | 1.05 | 1.20 | 1.15 | 1.17 | 1.12 | 0.78 | 0.76 | 0.78 | 0.70 | 0.84 | 0.80 | 0.88 | 0.85 | 33.28  | 9.83 |
| Q9DBS1 | Transmembrane protein 43<br>OS=Mus musculus<br>GN=Tmem43 PE=1<br>SV=1 -<br>[TMM43_MOUSE]                                    | 10.00 | 1 | 4  | 4  | 10 | 0.95 | 1.20 | 1.26 | 1.02 | 1.08 | 0.80 | 0.77 | 0.78 | 0.84 | 0.94 | 0.98 | 1.04 | 1.03 | 44.76  | 7.36 |
| Q7M6W1 | RTN1-C<br>OS=Mus musculus<br>GN=Rtn1 PE=2<br>SV=1 -<br>[Q7M6W1_MOUSE]                                                       | 27.40 | 2 | 2  | 5  | 26 | 1.03 | 0.98 | 0.87 | 1.06 | 0.96 | 0.89 | 0.79 | 0.78 | 0.77 | 0.94 | 0.95 | 1.01 | 0.91 | 23.54  | 8.91 |
| Q9D662 | Protein transport protein Sec23B<br>OS=Mus musculus<br>GN=Sec23b PE=2<br>SV=1 -<br>[SC23B_MOUSE]                            | 5.22  | 5 | 1  | 4  | 7  | 0.85 | 0.83 | 0.97 | 1.00 | 1.18 | 0.86 | 1.00 | 0.78 | 0.92 | 0.87 | 1.03 | 0.82 | 0.97 | 86.38  | 6.96 |
| Q3UH45 | Protein Tecpr2<br>OS=Mus musculus<br>GN=Tecpr2 PE=2<br>SV=1 -<br>[Q3UH45_MOUSE]                                             | 1.41  | 1 | 2  | 2  | 3  | 0.75 | 0.98 | 1.30 | 0.84 | 1.12 | 0.82 | 1.10 | 0.78 | 1.04 | 0.73 | 0.99 | 1.06 | 1.11 | 154.84 | 5.38 |

|        |                                                                                                                             |       |   |    |    |    |      |      |      |      |      |      |      |      |      |      |      |      |      |        |      |      |
|--------|-----------------------------------------------------------------------------------------------------------------------------|-------|---|----|----|----|------|------|------|------|------|------|------|------|------|------|------|------|------|--------|------|------|
| H3BKCS | U6 snRNA-associated Sm-like protein LSm5 (Fragment) OS=Mus musculus GN=Lsm5 PE=2 SV=1 - [H3BKCS_MOUSE]                      | 38.10 | 1 | 1  | 1  | 1  | 1    | 1.04 | 0.63 | 0.61 | 0.81 | 0.77 | 0.80 | 0.77 | 0.78 | 0.75 | 0.72 | 0.69 | 0.73 | 0.70   | 4.61 | 5.10 |
| Q9WVQ5 | Methylthioribulose-1-phosphate dehydratase OS=Mus musculus GN=Apip PE=1 SV=1 - [MTNB_MOUSE]                                 | 53.11 | 1 | 8  | 8  | 21 | 1.11 | 0.97 | 0.74 | 0.89 | 0.87 | 0.77 | 0.74 | 0.78 | 0.70 | 0.77 | 0.66 | 0.75 | 0.59 | 26.93  | 6.90 |      |
| Q8K0B2 | Isoform 3 of Probable lysosomal cobalamin transporter OS=Mus musculus GN=Lmbrd1 - [LMBD1_MOUSE]                             | 3.85  | 3 | 1  | 1  | 2  | 0.99 | 1.30 | 1.31 | 1.06 | 1.07 | 0.95 | 0.96 | 0.78 | 0.79 | 0.96 | 0.97 | 0.80 | 0.81 | 53.41  | 7.80 |      |
| E9Q330 | Platelet-activating factor acetylhydrolase (Fragment) OS=Mus musculus GN=Pla2g7 PE=2 SV=1 - [E9Q330_MOUSE]                  | 10.40 | 4 | 3  | 3  | 6  | 0.99 | 0.86 | 0.90 | 0.93 | 0.93 | 0.79 | 0.78 | 0.78 | 0.77 | 0.87 | 0.88 | 0.77 | 0.78 | 33.17  | 7.23 |      |
| P22599 | Alpha-1-antitrypsin 1-2 OS=Mus musculus GN=Serpina1b PE=1 SV=2 - [A1AT2_MOUSE]                                              | 23.00 | 4 | 3  | 8  | 18 | 0.83 | 0.98 | 1.17 | 0.73 | 0.90 | 0.71 | 0.86 | 0.78 | 0.90 | 1.08 | 1.20 | 0.62 | 0.77 | 45.95  | 5.54 |      |
| I7HPY0 | SH3 domain-binding glutamic acid-rich-like protein 3 OS=Mus musculus GN=Sh3bgr13 PE=4 SV=1 - [I7HPY0_MOUSE]                 | 94.59 | 1 | 1  | 2  | 23 | 0.88 | 0.70 | 0.79 | 0.42 | 0.48 | 0.86 | 0.97 | 0.78 | 0.89 | 0.65 | 0.74 | 0.80 | 0.90 | 4.21   | 4.32 |      |
| Q9D387 | Lysosome-associated membrane glycoprotein 5 OS=Mus musculus GN=Lamp5 PE=1 SV=2 - [LAMP5_MOUSE]                              | 7.14  | 1 | 2  | 2  | 3  | 1.46 | 0.94 | 0.64 | 1.07 | 0.73 | 0.90 | 0.61 | 0.78 | 0.53 | 0.82 | 0.56 | 1.07 | 0.73 | 31.70  | 6.14 |      |
| Q9WTS5 | Teneurin-2 OS=Mus musculus GN=Tenn2 PE=2 SV=1 - [TEN2_MOUSE]                                                                | 8.72  | 1 | 15 | 16 | 38 | 1.04 | 1.20 | 1.09 | 1.05 | 1.03 | 0.77 | 0.76 | 0.78 | 0.79 | 0.82 | 0.75 | 0.81 | 0.81 | 306.27 | 6.68 |      |
| Q61239 | Protein farnesyltransferase/geranylgeranyltransferase type-1 subunit alpha OS=Mus musculus GN=Fnta PE=1 SV=1 - [FNTA_MOUSE] | 7.96  | 1 | 3  | 3  | 6  | 0.95 | 0.93 | 0.92 | 0.99 | 1.03 | 0.89 | 0.96 | 0.78 | 0.82 | 0.84 | 0.87 | 0.86 | 0.93 | 43.99  | 4.93 |      |
| Q8R307 | Vacuolar protein sorting-associated protein 18 homolog OS=Mus musculus GN=Vps18 PE=1 SV=2 - [VPS18_MOUSE]                   | 8.94  | 1 | 6  | 6  | 18 | 1.07 | 1.30 | 1.11 | 1.21 | 1.14 | 0.88 | 0.87 | 0.78 | 0.76 | 0.98 | 0.92 | 1.05 | 1.09 | 110.15 | 6.09 |      |



|        |                                                                                                                      |       |   |    |    |     |      |      |      |      |      |      |      |      |      |      |      |      |      |        |      |
|--------|----------------------------------------------------------------------------------------------------------------------|-------|---|----|----|-----|------|------|------|------|------|------|------|------|------|------|------|------|------|--------|------|
| Q5M8N4 | Isoform 2 of Epimerase family protein SDR39U1 OS=Mus musculus GN=Sdr39u1 - [D39U1_MOUSE]                             | 4.44  | 2 | 1  | 1  | 2   | 0.94 | 1.19 | 1.27 | 0.84 | 0.89 | 0.71 | 0.75 | 0.78 | 0.83 | 0.88 | 0.94 | 1.04 | 1.11 | 31.44  | 9.31 |
| Q9CQC6 | Basic leucine zipper and W2 domain-containing protein 1 OS=Mus musculus GN=Bzw1 PE=1 SV=1 - [BZW1_MOUSE]             | 7.40  | 1 | 4  | 4  | 7   | 0.96 | 0.94 | 0.82 | 0.98 | 0.95 | 0.83 | 0.83 | 0.78 | 0.81 | 0.82 | 0.85 | 0.84 | 0.79 | 48.01  | 5.92 |
| Q66GT5 | Phosphatidylglycerophosphatase and protein-tyrosine phosphatase 1 OS=Mus musculus GN=Ptpm1 PE=1 SV=1 - [PTPM1_MOUSE] | 4.15  | 2 | 1  | 1  | 1   | 0.96 | 1.20 | 1.25 | 1.07 | 1.11 | 0.77 | 0.80 | 0.78 | 0.82 | 0.83 | 0.87 | 0.98 | 1.03 | 21.93  | 9.72 |
| Q9D5T0 | ATPase family AAA domain-containing protein 1 OS=Mus musculus GN=Atad1 PE=1 SV=1 - [ATAD1_MOUSE]                     | 12.47 | 1 | 3  | 3  | 4   | 0.79 | 1.44 | 1.18 | 0.94 | 1.19 | 0.83 | 0.96 | 0.78 | 0.94 | 0.61 | 0.78 | 0.72 | 1.02 | 40.72  | 6.90 |
| P35285 | Ras-related protein Rab22A OS=Mus musculus GN=Rab22a PE=1 SV=2 - [RB22A_MOUSE]                                       | 31.44 | 3 | 3  | 5  | 6   | 1.17 | 0.94 | 0.80 | 1.07 | 0.88 | 0.90 | 0.80 | 0.79 | 0.76 | 0.86 | 0.84 | 0.83 | 0.82 | 21.79  | 8.15 |
| Q6ZQH8 | Nucleoporin NUP188 homolog OS=Mus musculus GN=Nup188 PE=1 SV=2 - [NU188_MOUSE]                                       | 0.68  | 1 | 1  | 1  | 2   | 0.99 | 1.27 | 1.28 | 1.32 | 1.33 | 0.67 | 0.67 | 0.79 | 0.79 | 0.96 | 0.97 | 0.90 | 0.91 | 196.57 | 7.01 |
| Q9CZN7 | Serine hydroxymethyltransferase OS=Mus musculus GN=Shmt2 PE=2 SV=1 - [Q9CZN7_MOUSE]                                  | 9.52  | 1 | 5  | 5  | 6   | 1.04 | 1.10 | 1.02 | 1.16 | 1.15 | 0.89 | 0.83 | 0.79 | 0.78 | 0.81 | 0.84 | 0.88 | 0.85 | 55.72  | 8.47 |
| P70362 | Ubiquitin fusion degradation protein 1 homolog OS=Mus musculus GN=Ufd11 PE=1 SV=2 - [UFD1_MOUSE]                     | 18.89 | 2 | 5  | 5  | 9   | 1.10 | 0.76 | 0.78 | 1.02 | 1.09 | 0.82 | 0.82 | 0.79 | 0.87 | 0.74 | 0.72 | 0.72 | 0.71 | 34.46  | 6.70 |
| Q9DC4  | Pyroline-5-carboxylate reductase 3 OS=Mus musculus GN=Pyer1 PE=2 SV=2 - [PSCR3_MOUSE]                                | 26.64 | 1 | 5  | 5  | 7   | 1.31 | 0.93 | 0.76 | 0.97 | 0.85 | 0.70 | 0.70 | 0.79 | 0.60 | 0.77 | 0.77 | 0.76 | 0.58 | 28.70  | 7.27 |
| Q791V5 | Mitochondrial carrier homolog 2 OS=Mus musculus GN=Mtch2 PE=1 SV=1 - [MTCH2_MOUSE]                                   | 29.37 | 3 | 7  | 7  | 15  | 1.01 | 1.17 | 1.12 | 1.14 | 1.13 | 0.78 | 0.69 | 0.79 | 0.76 | 0.84 | 0.81 | 0.99 | 0.94 | 33.48  | 8.25 |
| P06151 | L-lactate dehydrogenase A chain OS=Mus musculus GN=Ldha PE=1 SV=3 - [LDHA_MOUSE]                                     | 59.94 | 7 | 18 | 20 | 157 | 0.99 | 0.93 | 0.95 | 1.08 | 1.08 | 0.84 | 0.85 | 0.79 | 0.79 | 0.85 | 0.87 | 0.95 | 0.93 | 36.48  | 7.74 |
| P21570 | Angiogenin OS=Mus musculus GN=Ang PE=1 SV=1 - [ANGI_MOUSE]                                                           | 7.59  | 1 | 1  | 1  | 1   | 0.90 | 0.97 | 1.08 | 0.94 | 1.05 | 0.85 | 0.94 | 0.79 | 0.87 | 0.88 | 0.98 | 0.82 | 0.92 | 16.22  | 9.41 |

|          |                                                                                                                   |       |   |    |    |    |      |      |      |      |      |      |      |      |      |      |      |      |      |       |      |
|----------|-------------------------------------------------------------------------------------------------------------------|-------|---|----|----|----|------|------|------|------|------|------|------|------|------|------|------|------|------|-------|------|
| Q6P816   | Cytochrome c oxidase assembly protein COX11, mitochondrial OS=Mus musculus GN=Cox11 PE=2 SV=1 - [COX11_MOUSE]     | 2.55  | 1 | 1  | 1  | 1  | 1.19 | 1.10 | 0.92 | 0.89 | 0.75 | 1.18 | 0.98 | 0.79 | 0.66 | 1.17 | 0.98 | 0.96 | 0.81 | 30.83 | 8.78 |
| Q8BBE8   | Uncharacterized protein C2orf47 homolog, mitochondrial OS=Mus musculus PE=2 SV=1 - [CB047_MOUSE]                  | 7.22  | 5 | 1  | 2  | 9  | 0.99 | 0.91 | 0.92 | 1.08 | 1.09 | 0.79 | 0.80 | 0.79 | 0.79 | 0.85 | 0.86 | 0.92 | 0.94 | 32.96 | 9.14 |
| P36552   | Coproporphyrinogen-III oxidase, mitochondrial OS=Mus musculus GN=Cpox PE=1 SV=2 - [HEM6_MOUSE]                    | 16.93 | 1 | 5  | 5  | 11 | 0.92 | 1.02 | 1.13 | 0.94 | 1.06 | 0.86 | 0.91 | 0.79 | 0.94 | 0.84 | 0.90 | 0.91 | 0.98 | 49.68 | 8.53 |
| D3YU06   | Abhydrolase domain-containing protein 3 OS=Mus musculus GN=Abhd3 PE=2 SV=1 - [D3YU06_MOUSE]                       | 7.21  | 4 | 2  | 2  | 4  | 0.88 | 0.96 | 1.09 | 1.04 | 1.18 | 0.76 | 0.86 | 0.79 | 0.89 | 0.89 | 1.01 | 0.90 | 1.03 | 45.21 | 7.30 |
| D3Z151   | Translation initiation factor eIF-2B subunit alpha (Fragment) OS=Mus musculus GN=Ei2b1 PE=2 SV=1 - [D3Z151_MOUSE] | 5.38  | 2 | 1  | 1  | 2  | 1.27 | 0.83 | 0.65 | 1.17 | 0.92 | 0.95 | 0.75 | 0.79 | 0.62 | 0.83 | 0.65 | 0.92 | 0.73 | 20.62 | 9.19 |
| F6ZEW4   | Exportin-2 (Fragment) OS=Mus musculus GN=Cse11 PE=2 SV=1 - [F6ZEW4_MOUSE]                                         | 5.62  | 4 | 4  | 4  | 5  | 0.96 | 1.15 | 1.26 | 1.11 | 1.09 | 0.86 | 0.89 | 0.79 | 0.83 | 0.96 | 0.99 | 1.13 | 1.07 | 74.36 | 6.18 |
| Q9CZW5   | Mitochondrial import receptor subunit TOM70 OS=Mus musculus GN=Tomm70a PE=1 SV=2 - [TOM70_MOUSE]                  | 35.02 | 1 | 17 | 17 | 51 | 0.98 | 0.90 | 0.90 | 1.10 | 1.13 | 0.85 | 0.92 | 0.79 | 0.84 | 0.87 | 0.96 | 0.96 | 1.00 | 67.55 | 7.53 |
| Q9DB73   | NADH-cytochrome b5 reductase 1 OS=Mus musculus GN=Cyb5r1 PE=2 SV=1 - [NB5R1_MOUSE]                                | 31.15 | 3 | 8  | 8  | 18 | 0.90 | 0.98 | 1.08 | 1.03 | 1.14 | 0.81 | 0.81 | 0.79 | 0.79 | 0.86 | 0.96 | 0.95 | 0.97 | 34.11 | 8.87 |
| Q3UE31   | Uncharacterized protein KIAA0930 homolog OS=Mus musculus PE=1 SV=2 - [K0930_MOUSE]                                | 5.20  | 2 | 2  | 2  | 4  | 0.90 | 1.80 | 2.01 | 1.01 | 1.13 | 0.69 | 0.76 | 0.79 | 0.88 | 0.76 | 0.85 | 0.92 | 1.02 | 45.93 | 8.13 |
| Q8R1V9   | Protein Qars OS=Mus musculus GN=Qars PE=2 SV=1 - [Q8R1V9_MOUSE]                                                   | 5.61  | 3 | 3  | 3  | 5  | 0.98 | 0.87 | 1.00 | 1.03 | 1.09 | 0.84 | 0.86 | 0.79 | 0.80 | 0.97 | 0.99 | 0.97 | 1.03 | 68.78 | 7.39 |
| Q9D486-3 | Isoform 3 of C-Maf-inducing protein OS=Mus musculus GN=Cmip - [CMIP_MOUSE]                                        | 5.77  | 2 | 2  | 2  | 2  | 0.88 | 0.97 | 1.10 | 0.97 | 1.10 | 0.81 | 0.92 | 0.79 | 0.89 | 0.89 | 1.01 | 0.90 | 1.03 | 54.14 | 7.12 |
| P28474   | Alcohol dehydrogenase class-3 OS=Mus musculus GN=Adh5 PE=1 SV=3 - [ADHX_MOUSE]                                    | 31.55 | 2 | 8  | 8  | 20 | 0.97 | 1.01 | 0.98 | 1.10 | 1.16 | 0.85 | 0.80 | 0.79 | 0.81 | 0.81 | 0.80 | 0.85 | 0.83 | 39.52 | 7.25 |

|          |                                                                                                               |       |   |   |   |     |      |      |      |      |      |      |      |      |      |      |      |      |      |        |      |
|----------|---------------------------------------------------------------------------------------------------------------|-------|---|---|---|-----|------|------|------|------|------|------|------|------|------|------|------|------|------|--------|------|
| Q91W43   | Glycine dehydrogenase [decarboxylating], mitochondrial OS=Mus musculus GN=Gldc PE=1 SV=1 - [GCSP_MOUSE]       | 10.93 | 1 | 9 | 9 | 17  | 0.97 | 1.12 | 1.14 | 1.11 | 1.13 | 0.80 | 0.81 | 0.79 | 0.77 | 0.82 | 0.89 | 0.83 | 0.89 | 113.20 | 7.56 |
| P31648   | Sodium- and chloride-dependent GABA transporter 1 OS=Mus musculus GN=Slc6a1 PE=1 SV=2 - [SC6A1_MOUSE]         | 14.02 | 1 | 5 | 5 | 44  | 1.05 | 0.96 | 0.96 | 1.09 | 1.01 | 0.87 | 0.83 | 0.79 | 0.78 | 0.93 | 0.86 | 0.88 | 0.82 | 66.96  | 7.96 |
| Q6PE15   | Mycophenolic acid acylglucuronide esterase, mitochondrial OS=Mus musculus GN=Abhd10 PE=2 SV=1 - [ABHDA_MOUSE] | 17.51 | 3 | 5 | 5 | 7   | 0.97 | 1.20 | 1.22 | 1.01 | 1.03 | 0.73 | 0.74 | 0.79 | 0.78 | 0.75 | 0.82 | 0.76 | 0.82 | 33.02  | 8.79 |
| Q925H0   | Acid-sensing ion channel 2 OS=Mus musculus GN=Asic2 PE=1 SV=1 - [ASIC2_MOUSE]                                 | 2.54  | 2 | 1 | 1 | 2   | 1.00 | 1.04 | 1.04 | 1.20 | 1.20 | 0.71 | 0.70 | 0.79 | 0.79 | 0.77 | 0.77 | 0.81 | 0.81 | 57.70  | 5.19 |
| Q9D019   | Arginine--tRNA ligase, cytoplasmic OS=Mus musculus GN=Rars PE=2 SV=2 - [SYRC_MOUSE]                           | 12.42 | 1 | 8 | 8 | 11  | 1.08 | 0.96 | 0.84 | 1.16 | 1.10 | 0.90 | 0.83 | 0.79 | 0.71 | 0.96 | 0.93 | 1.06 | 0.97 | 75.63  | 7.55 |
| Q8BP00-2 | Isoform 2 of IQ calmodulin-binding motif-containing protein 1 OS=Mus musculus GN=Iqcb1 - [IQCB1_MOUSE]        | 5.53  | 2 | 3 | 3 | 4   | 1.10 | 1.24 | 1.21 | 1.05 | 0.98 | 0.84 | 0.82 | 0.79 | 0.74 | 0.85 | 0.82 | 1.06 | 0.86 | 69.03  | 9.51 |
| Q9J175   | Ribosyl-dihydroxynicotinamide dehydrogenase [quinone] OS=Mus musculus GN=Nqo2 PE=2 SV=3 - [NQO2_MOUSE]        | 24.68 | 1 | 4 | 4 | 7   | 1.00 | 0.91 | 0.91 | 1.05 | 1.06 | 0.83 | 0.81 | 0.79 | 0.79 | 0.85 | 0.81 | 0.85 | 0.84 | 26.23  | 7.01 |
| P06684   | Complement C5 OS=Mus musculus GN=C5 PE=1 SV=2 - [COS_MOUSE]                                                   | 0.95  | 1 | 1 | 1 | 1   | 0.95 | 1.18 | 1.24 | 0.94 | 0.99 | 1.00 | 1.05 | 0.79 | 0.83 | 0.84 | 0.89 | 0.74 | 0.78 | 188.76 | 6.81 |
| P60202   | Myelin proteolipid protein OS=Mus musculus GN=Ptp1 PE=1 SV=2 - [MYPR_MOUSE]                                   | 28.52 | 2 | 9 | 9 | 159 | 1.08 | 1.07 | 1.01 | 1.18 | 1.05 | 0.81 | 0.73 | 0.79 | 0.72 | 0.84 | 0.77 | 0.94 | 0.83 | 30.06  | 8.35 |
| Q9JHU9   | Inositol-3-phosphate synthase 1 OS=Mus musculus GN=Isyn1 PE=2 SV=1 - [INO1_MOUSE]                             | 15.62 | 1 | 7 | 7 | 17  | 1.22 | 1.02 | 0.86 | 0.89 | 0.76 | 0.75 | 0.59 | 0.79 | 0.66 | 0.81 | 0.65 | 0.93 | 0.78 | 60.89  | 6.42 |
| P61620   | Protein transport protein Sec61 subunit alpha isoform 1 OS=Mus musculus GN=Sec61a1 PE=2 SV=2 - [S61A1_MOUSE]  | 5.67  | 2 | 1 | 2 | 3   | 1.06 | 0.86 | 0.82 | 0.93 | 0.88 | 0.83 | 0.79 | 0.79 | 0.75 | 0.87 | 0.82 | 0.99 | 0.94 | 52.23  | 8.06 |

|        |                                                                                                                                 |       |   |    |    |    |      |      |      |      |      |      |      |      |      |      |      |      |      |        |      |
|--------|---------------------------------------------------------------------------------------------------------------------------------|-------|---|----|----|----|------|------|------|------|------|------|------|------|------|------|------|------|------|--------|------|
| Q8JZN5 | Acyl-CoA dehydrogenase family member 9, mitochondrial OS=Mus musculus GN=Acad9 PE=2 SV=2 - [ACAD9_MOUSE]                        | 27.68 | 3 | 14 | 14 | 30 | 1.04 | 1.05 | 1.14 | 1.10 | 1.06 | 0.82 | 0.83 | 0.79 | 0.83 | 0.85 | 0.86 | 0.98 | 0.92 | 68.68  | 7.46 |
| Q920M7 | Synaptotagmin-17 OS=Mus musculus GN=Syt17 PE=2 SV=1 - [SYT17_MOUSE]                                                             | 9.79  | 1 | 4  | 4  | 5  | 1.06 | 1.09 | 0.85 | 0.91 | 0.91 | 0.93 | 0.87 | 0.79 | 0.75 | 1.01 | 0.96 | 1.11 | 1.05 | 53.26  | 7.15 |
| Q3UHC9 | Potassium voltage-gated channel subfamily H member 1 OS=Mus musculus GN=Kcnh1 PE=2 SV=1 - [Q3UHC9_MOUSE]                        | 1.66  | 2 | 1  | 2  | 2  | 0.93 | 1.03 | 1.10 | 0.96 | 1.04 | 0.90 | 0.97 | 0.79 | 0.85 | 0.82 | 0.89 | 0.86 | 0.93 | 108.42 | 7.69 |
| Q8BTZ7 | Mannose-1-phosphate guanylyltransferase beta OS=Mus musculus GN=Gmppb PE=2 SV=1 - [GMPPB_MOUSE]                                 | 15.56 | 1 | 4  | 4  | 7  | 0.92 | 1.21 | 1.13 | 1.01 | 1.00 | 0.93 | 0.94 | 0.79 | 0.91 | 0.87 | 0.93 | 1.02 | 0.94 | 39.89  | 6.74 |
| A2AT37 | Protein Upf2 OS=Mus musculus GN=Upf2 PE=2 SV=1 - [A2AT37_MOUSE]                                                                 | 4.33  | 2 | 5  | 5  | 6  | 0.93 | 1.01 | 1.02 | 0.86 | 1.08 | 0.84 | 1.01 | 0.79 | 0.91 | 0.78 | 1.03 | 0.64 | 0.84 | 147.46 | 5.64 |
| Q9DC69 | NADH dehydrogenase [ubiquinone] 1 alpha subcomplex subunit 9, mitochondrial OS=Mus musculus GN=Ndufa9 PE=1 SV=2 - [NDUA9_MOUSE] | 32.63 | 1 | 12 | 12 | 42 | 1.03 | 1.03 | 1.08 | 1.17 | 1.14 | 0.79 | 0.77 | 0.79 | 0.76 | 0.85 | 0.81 | 0.94 | 0.86 | 42.50  | 9.74 |
| Q9ESM3 | Hyaluronan and proteoglycan link protein 2 OS=Mus musculus GN=Hapln2 PE=1 SV=1 - [HPLN2_MOUSE]                                  | 13.78 | 1 | 4  | 4  | 10 | 0.98 | 1.25 | 1.25 | 1.02 | 1.02 | 0.80 | 0.87 | 0.79 | 0.79 | 0.88 | 0.84 | 1.02 | 0.99 | 37.90  | 9.09 |
| Q3UY51 | Leucine-rich repeat-containing protein 55 OS=Mus musculus GN=Lrc55 PE=2 SV=1 - [LRC55_MOUSE]                                    | 4.18  | 1 | 1  | 1  | 2  | 0.98 | 1.08 | 1.11 | 1.04 | 1.07 | 0.79 | 0.81 | 0.79 | 0.81 | 0.83 | 0.86 | 1.15 | 1.18 | 34.44  | 6.39 |
| Q3TYK3 | Nuclear factor 1 OS=Mus musculus GN=Nfix PE=2 SV=1 - [Q3TYK3_MOUSE]                                                             | 3.58  | 6 | 1  | 1  | 1  | 0.87 | 0.51 | 0.59 | 1.02 | 1.18 | 0.89 | 1.02 | 0.79 | 0.91 | 0.84 | 0.97 | 0.61 | 0.70 | 43.57  | 7.99 |
| Q3TPJ8 | Cytoplasmic dynein 1 intermediate chain 2 OS=Mus musculus GN=Dynci2 PE=2 SV=1 - [Q3TPJ8_MOUSE]                                  | 31.33 | 5 | 13 | 13 | 71 | 0.96 | 0.83 | 0.90 | 0.92 | 0.95 | 0.80 | 0.90 | 0.79 | 0.85 | 0.81 | 0.85 | 0.71 | 0.79 | 70.57  | 5.24 |

|        |                                                                                                                       |      |   |   |   |    |      |      |      |      |      |      |      |      |      |      |      |      |      |        |       |      |
|--------|-----------------------------------------------------------------------------------------------------------------------|------|---|---|---|----|------|------|------|------|------|------|------|------|------|------|------|------|------|--------|-------|------|
| Q9ERZ4 | Muscarinic acetylcholine receptor M2 OS=Mus musculus GN=Chrm2 PE=1 SV=2 - [ACM2_MOUSE]                                | 1.72 | 1 | 1 | 1 | 1  | 1    | 0.68 | 0.83 | 1.22 | 1.02 | 1.51 | 0.91 | 1.33 | 0.79 | 1.16 | 0.77 | 1.13 | 0.90 | 1.33   | 51.47 | 8.92 |
| D3YVU9 | 3-hydroxymethyl-3-methylglutaryl-CoA lyase, cytoplasmic OS=Mus musculus GN=Hmgcl1 PE=2 SV=1 - [D3YVU9_MOUSE]          | 4.85 | 3 | 1 | 1 | 2  | 1.05 | 1.21 | 1.15 | 1.04 | 0.99 | 0.74 | 0.70 | 0.79 | 0.75 | 0.90 | 0.85 | 0.92 | 0.88 | 22.47  | 6.73  |      |
| D3YWW2 | Gamma-glutamyltranspeptidase 1 (Fragment) OS=Mus musculus GN=Ggt1 PE=2 SV=1 - [D3YWW2_MOUSE]                          | 5.29 | 8 | 1 | 1 | 2  | 1.00 | 1.25 | 1.25 | 0.93 | 0.93 | 0.76 | 0.76 | 0.79 | 0.79 | 0.81 | 0.81 | 0.85 | 0.85 | 20.36  | 9.14  |      |
| E9Q4K2 | Lactation elevated protein 1 OS=Mus musculus GN=Lace1 PE=2 SV=1 - [E9Q4K2_MOUSE]                                      | 4.30 | 2 | 1 | 1 | 2  | 1.00 | 0.89 | 0.89 | 1.17 | 1.17 | 0.83 | 0.83 | 0.79 | 0.79 | 0.82 | 0.82 | 0.85 | 0.85 | 31.19  | 9.42  |      |
| Q8R3H7 | Heparan sulfate 2-O-sulfotransferase 1 OS=Mus musculus GN=Hs2st1 PE=1 SV=2 - [HS2ST_MOUSE]                            | 2.53 | 1 | 1 | 1 | 1  | 0.82 | 0.97 | 1.19 | 0.97 | 1.18 | 0.74 | 0.90 | 0.79 | 0.97 | 0.66 | 0.80 | 0.84 | 1.03 | 41.79  | 8.57  |      |
| A6PWX1 | Calcium channel flower homolog OS=Mus musculus GN=Cacfd1 PE=2 SV=1 - [A6PWX1_MOUSE]                                   | 6.42 | 2 | 1 | 1 | 1  | 1.09 | 0.99 | 0.91 | 1.04 | 0.96 | 0.80 | 0.73 | 0.79 | 0.73 | 0.91 | 0.84 | 0.91 | 0.84 | 12.04  | 5.06  |      |
| Q8BUV8 | Protein GPR107 OS=Mus musculus GN=Gpr107 PE=2 SV=2 - [GP107_MOUSE]                                                    | 1.63 | 1 | 1 | 1 | 1  | 1.02 | 0.52 | 0.51 | 1.19 | 1.17 | 0.90 | 0.88 | 0.79 | 0.78 | 0.84 | 0.82 | 0.83 | 0.82 | 62.02  | 7.59  |      |
| Q91WH7 | ATPase, H+/K+ exchanging, gastric, alpha polypeptide OS=Mus musculus GN=Atp4a PE=2 SV=1 - [Q91WH7_MOUSE]              | 9.95 | 3 | 4 | 9 | 95 | 0.90 | 0.88 | 0.98 | 0.96 | 1.02 | 0.87 | 0.97 | 0.79 | 0.88 | 0.89 | 0.99 | 0.89 | 1.00 | 112.96 | 5.81  |      |
| A2AVP4 | RING finger and CCCH-type zinc finger domain-containing protein 2 OS=Mus musculus GN=Rc3h2 PE=2 SV=1 - [A2AVP4_MOUSE] | 1.33 | 2 | 1 | 1 | 2  | 0.92 | 0.74 | 0.81 | 0.87 | 0.95 | 0.88 | 0.95 | 0.79 | 0.86 | 0.70 | 0.77 | 1.12 | 1.22 | 124.63 | 7.20  |      |
| Q8C0D5 | Elongation factor Tu GTP-binding domain-containing protein 1 OS=Mus musculus GN=Eftud1 PE=2 SV=1 - [ETUD1_MOUSE]      | 1.95 | 1 | 2 | 2 | 3  | 0.97 | 1.23 | 1.28 | 1.18 | 1.22 | 0.98 | 1.01 | 0.79 | 0.82 | 1.11 | 1.15 | 0.96 | 1.00 | 125.70 | 6.16  |      |

|          |                                                                                                               |       |   |    |    |    |      |      |      |      |      |      |      |      |      |      |      |      |      |        |      |
|----------|---------------------------------------------------------------------------------------------------------------|-------|---|----|----|----|------|------|------|------|------|------|------|------|------|------|------|------|------|--------|------|
| Q9D1P4   | Cysteine and histidine-rich domain-containing protein 1 OS=Mus musculus GN=Chordc1 PE=1 SV=1 - [CHRD1_MOUSE]  | 44.71 | 1 | 11 | 11 | 29 | 0.96 | 0.86 | 0.77 | 0.94 | 0.94 | 0.82 | 0.83 | 0.79 | 0.85 | 0.81 | 0.86 | 0.78 | 0.82 | 37.33  | 7.90 |
| Q99MN9   | Propionyl-CoA carboxylase beta chain, mitochondrial OS=Mus musculus GN=Pccb PE=1 SV=2 - [PCCB_MOUSE]          | 39.74 | 3 | 15 | 15 | 29 | 0.93 | 0.94 | 1.03 | 1.05 | 1.11 | 0.89 | 0.92 | 0.79 | 0.85 | 0.94 | 1.00 | 0.96 | 0.99 | 58.37  | 7.66 |
| Q3UU13   | Acyl-coenzyme A thioesterase THEM4 OS=Mus musculus GN=Them4 PE=1 SV=1 - [THEM4_MOUSE]                         | 19.13 | 2 | 4  | 4  | 10 | 0.95 | 1.00 | 0.85 | 1.12 | 1.13 | 0.93 | 0.91 | 0.79 | 0.84 | 0.92 | 0.97 | 0.87 | 1.01 | 26.01  | 9.64 |
| E9Q305   | Protein Sb2 OS=Mus musculus GN=Sb2 PE=2 SV=1 - [E9Q305_MOUSE]                                                 | 1.19  | 1 | 1  | 1  | 2  | 0.77 | 1.06 | 1.36 | 1.03 | 1.33 | 0.94 | 1.21 | 0.79 | 1.02 | 0.92 | 1.18 | 0.91 | 1.18 | 207.50 | 7.18 |
| F8VPK0   | Protein Ttc37 OS=Mus musculus GN=Ttc37 PE=2 SV=1 - [F8VPK0_MOUSE]                                             | 0.64  | 1 | 1  | 1  | 1  | 1.27 | 1.09 | 0.86 | 1.14 | 0.90 | 1.12 | 0.88 | 0.79 | 0.63 | 1.09 | 0.86 | 1.52 | 1.20 | 173.83 | 7.12 |
| Q6NY15-5 | Isoform 2 of Testis-specific gene 10 protein OS=Mus musculus GN=Tsga10 - [TSG10_MOUSE]                        | 5.36  | 4 | 3  | 3  | 3  | 1.08 | 1.13 | 1.05 | 1.07 | 1.02 | 0.96 | 0.78 | 0.79 | 0.75 | 1.38 | 1.12 | 1.07 | 1.02 | 80.30  | 5.80 |
| O08967   | Cytohesin-3 OS=Mus musculus GN=Cyth3 PE=1 SV=1 - [CYH3_MOUSE]                                                 | 20.05 | 3 | 4  | 7  | 19 | 0.77 | 0.94 | 1.09 | 0.85 | 1.12 | 0.67 | 0.96 | 0.79 | 0.99 | 0.67 | 0.88 | 0.66 | 0.88 | 46.25  | 5.54 |
| Q8R127   | Saccharopine dehydrogenase-like oxidoreductase OS=Mus musculus GN=Sccpdh PE=2 SV=1 - [SCPDL_MOUSE]            | 22.38 | 2 | 7  | 7  | 14 | 1.00 | 1.07 | 1.05 | 1.14 | 1.14 | 0.83 | 0.85 | 0.79 | 0.77 | 0.99 | 0.98 | 1.04 | 1.02 | 47.10  | 8.60 |
| Q8BIF2-4 | Isoform 4 of RNA binding protein fox-1 homolog 3 OS=Mus musculus GN=Rbfox3 - [RFOX3_MOUSE]                    | 29.07 | 7 | 4  | 8  | 15 | 0.90 | 0.81 | 0.85 | 0.92 | 1.02 | 0.78 | 0.85 | 0.80 | 0.89 | 0.66 | 0.77 | 0.95 | 1.04 | 34.05  | 7.27 |
| E9Q264   | Protein Myh15 OS=Mus musculus GN=Myh15 PE=4 SV=1 - [E9Q264_MOUSE]                                             | 2.60  | 1 | 1  | 5  | 9  | 0.98 | 0.77 | 0.78 | 0.73 | 0.74 | 0.99 | 1.01 | 0.80 | 0.81 | 0.95 | 0.97 | 1.03 | 1.05 | 221.71 | 6.13 |
| P58802   | TBC1 domain family member 10A OS=Mus musculus GN=Tbcd10a PE=1 SV=1 - [TB10A_MOUSE]                            | 1.40  | 2 | 1  | 1  | 1  | 0.79 | 0.98 | 1.24 | 0.93 | 1.18 | 0.69 | 0.87 | 0.80 | 1.01 | 0.79 | 1.00 | 0.80 | 1.01 | 56.17  | 7.85 |
| Q7TPM6   | Isoform 2 of Fibronectin type III and SPRY domain-containing protein 1 OS=Mus musculus GN=Fsd1 - [FSD1_MOUSE] | 11.90 | 2 | 4  | 4  | 9  | 1.03 | 0.94 | 0.79 | 1.06 | 0.91 | 0.93 | 0.83 | 0.80 | 0.75 | 0.87 | 0.79 | 0.98 | 0.92 | 53.65  | 6.95 |

|        |                                                                                                                              |       |   |   |   |    |      |      |      |      |      |      |      |      |      |      |      |      |      |        |      |
|--------|------------------------------------------------------------------------------------------------------------------------------|-------|---|---|---|----|------|------|------|------|------|------|------|------|------|------|------|------|------|--------|------|
| Q8CGB6 | Isoform 2 of Tensin-like C1 domain-containing phosphatase OS=Mus musculus GN=Tenc1 - [TENC1_MOUSE]                           | 1.74  | 4 | 1 | 2 | 4  | 1.01 | 1.11 | 1.10 | 1.03 | 1.01 | 0.62 | 0.61 | 0.80 | 0.78 | 0.79 | 0.78 | 0.88 | 0.87 | 149.41 | 8.34 |
| Q9JL56 | Glycerophosphodiester phosphodiesterase 1 OS=Mus musculus GN=Gde1 PE=2 SV=1 - [GDE1_MOUSE]                                   | 16.92 | 2 | 5 | 5 | 11 | 0.91 | 0.98 | 0.96 | 1.08 | 1.20 | 0.85 | 0.92 | 0.80 | 0.86 | 0.88 | 0.96 | 0.95 | 1.02 | 37.61  | 6.90 |
| Q99KF1 | Transmembrane emp24 domain-containing protein 9 OS=Mus musculus GN=Tmed9 PE=2 SV=2 - [TMED9_MOUSE]                           | 11.91 | 2 | 2 | 2 | 8  | 0.96 | 0.99 | 1.09 | 0.89 | 0.97 | 0.71 | 0.77 | 0.80 | 0.82 | 0.83 | 0.86 | 0.88 | 0.90 | 27.11  | 8.41 |
| Q5U458 | Dnaj homolog subfamily C member 11 OS=Mus musculus GN=Dnajc11 PE=2 SV=2 - [DJC11_MOUSE]                                      | 15.38 | 3 | 7 | 7 | 14 | 1.12 | 1.02 | 0.93 | 1.03 | 1.12 | 0.85 | 0.85 | 0.80 | 0.75 | 0.94 | 0.84 | 0.95 | 0.85 | 63.19  | 8.32 |
| Q80X95 | Ras-related GTP-binding protein A OS=Mus musculus GN=Rraga PE=2 SV=1 - [RRAGA_MOUSE]                                         | 19.81 | 3 | 5 | 5 | 8  | 1.04 | 1.11 | 1.12 | 1.02 | 1.04 | 0.88 | 0.90 | 0.80 | 0.75 | 0.93 | 0.85 | 1.02 | 0.95 | 36.54  | 7.72 |
| P61804 | Dolichyl-diphosphooligosaccharide--protein glycosyltransferase subunit DAD1 OS=Mus musculus GN=Dad1 PE=2 SV=3 - [DAD1_MOUSE] | 8.85  | 1 | 1 | 1 | 4  | 1.00 | 1.05 | 1.04 | 1.13 | 1.12 | 0.81 | 0.80 | 0.80 | 0.79 | 0.86 | 0.86 | 0.85 | 0.85 | 12.49  | 7.08 |
| Q921E2 | Ras-related protein Rab31 OS=Mus musculus GN=Rab31 PE=1 SV=1 - [RAB31_MOUSE]                                                 | 51.55 | 3 | 6 | 8 | 13 | 1.05 | 0.92 | 0.92 | 1.08 | 1.08 | 0.95 | 0.91 | 0.80 | 0.85 | 0.88 | 0.89 | 0.88 | 0.88 | 21.32  | 7.40 |
| Q9D0L4 | Uncharacterized aarF domain-containing protein kinase 1 OS=Mus musculus GN=Adck1 PE=2 SV=1 - [ADCK1_MOUSE]                   | 5.33  | 2 | 2 | 2 | 4  | 0.98 | 1.22 | 1.24 | 1.17 | 1.19 | 0.76 | 0.77 | 0.80 | 0.81 | 0.83 | 0.86 | 1.06 | 1.09 | 59.70  | 8.05 |
| P62743 | AP-2 complex subunit sigma OS=Mus musculus GN=Ap2s1 PE=1 SV=1 - [AP2S1_MOUSE]                                                | 21.83 | 1 | 3 | 3 | 40 | 1.05 | 1.11 | 1.09 | 1.06 | 1.03 | 0.87 | 0.80 | 0.80 | 0.78 | 0.86 | 0.87 | 0.96 | 0.93 | 17.01  | 6.18 |
| Q920P3 | Deleted in bladder cancer protein 1 homolog OS=Mus musculus GN=Dbc1 PE=2 SV=1 - [DBC1_MOUSE]                                 | 5.13  | 2 | 4 | 4 | 7  | 0.99 | 1.08 | 0.94 | 1.12 | 1.09 | 0.89 | 0.84 | 0.80 | 0.80 | 0.87 | 0.87 | 0.92 | 0.92 | 88.58  | 8.97 |
| Q8QZY6 | Tetraspanin-14 OS=Mus musculus GN=Tspan14 PE=1 SV=1 - [TSN14_MOUSE]                                                          | 6.30  | 1 | 1 | 1 | 1  | 1.09 | 0.92 | 0.85 | 0.93 | 0.86 | 0.63 | 0.58 | 0.80 | 0.73 | 0.80 | 0.74 | 0.55 | 0.51 | 30.65  | 6.51 |

|          |                                                                                                                          |       |    |    |    |    |      |      |      |      |      |      |      |      |      |      |      |      |      |        |       |
|----------|--------------------------------------------------------------------------------------------------------------------------|-------|----|----|----|----|------|------|------|------|------|------|------|------|------|------|------|------|------|--------|-------|
| Q6NXK8   | Acid-sensing ion channel 1 OS=Mus musculus GN=Asic1 PE=1 SV=1 - [ASIC1_MOUSE]                                            | 3.99  | 2  | 2  | 2  | 4  | 0.78 | 0.90 | 0.84 | 0.84 | 1.07 | 0.94 | 1.18 | 0.80 | 0.92 | 0.84 | 1.07 | 0.84 | 0.77 | 59.63  | 5.58  |
| P34914   | Bifunctional epoxide hydrolase 2 OS=Mus musculus GN=Ephx2 PE=1 SV=2 - [HYES_MOUSE]                                       | 25.45 | 2  | 10 | 10 | 20 | 0.98 | 0.94 | 0.96 | 1.06 | 1.08 | 0.81 | 0.86 | 0.80 | 0.84 | 0.85 | 0.93 | 0.91 | 0.97 | 62.47  | 6.19  |
| Q9QZE5   | Coatamer subunit gamma-1 OS=Mus musculus GN=Copg1 PE=2 SV=1 - [COPG1_MOUSE]                                              | 7.21  | 2  | 2  | 4  | 8  | 0.88 | 1.09 | 1.24 | 0.90 | 1.03 | 0.77 | 0.87 | 0.80 | 0.91 | 0.74 | 0.84 | 0.89 | 1.02 | 97.45  | 5.35  |
| P61924   | Coatamer subunit zeta-1 OS=Mus musculus GN=Copz1 PE=2 SV=1 - [COPZ1_MOUSE]                                               | 22.60 | 1  | 3  | 3  | 7  | 0.93 | 0.79 | 0.82 | 0.97 | 1.01 | 0.89 | 0.92 | 0.80 | 0.84 | 0.87 | 0.93 | 0.82 | 0.87 | 20.19  | 4.81  |
| E0CYK4   | Repressor of RNA polymerase III transcription MAF1 homolog (Fragment) OS=Mus musculus GN=Maf1 PE=2 SV=1 - [E0CYK4_MOUSE] | 3.47  | 3  | 1  | 1  | 1  | 0.91 | 0.89 | 0.97 | 0.83 | 0.91 | 0.92 | 1.00 | 0.80 | 0.87 | 0.78 | 0.86 | 0.76 | 0.84 | 22.16  | 5.39  |
| Q9ET43   | Claudin-12 OS=Mus musculus GN=Cldn12 PE=1 SV=2 - [CLD12_MOUSE]                                                           | 6.15  | 1  | 1  | 1  | 1  | 0.62 | 0.72 | 1.16 | 0.91 | 1.47 | 0.65 | 1.05 | 0.80 | 1.28 | 0.66 | 1.07 | 0.58 | 0.94 | 26.98  | 8.47  |
| Q3UUQ7   | GPI inositol-deacylase OS=Mus musculus GN=Pgap1 PE=1 SV=3 - [PGAP1_MOUSE]                                                | 1.30  | 1  | 1  | 1  | 2  | 1.30 | 1.21 | 0.93 | 1.07 | 0.82 | 0.79 | 0.60 | 0.80 | 0.61 | 0.91 | 0.70 | 1.16 | 0.89 | 104.51 | 8.91  |
| Q8R4G0   | Isoform 1C of Netrin-1 OS=Mus musculus GN=Ntn1 - [NTNG1_MOUSE]                                                           | 10.27 | 14 | 4  | 4  | 4  | 0.99 | 0.83 | 0.79 | 1.00 | 1.06 | 0.90 | 0.91 | 0.80 | 0.81 | 1.01 | 1.02 | 0.99 | 1.00 | 49.31  | 6.28  |
| Q3TIZ6   | Protein FAM98A OS=Mus musculus GN=Fam98a PE=2 SV=1 - [FA98A_MOUSE]                                                       | 5.63  | 1  | 1  | 2  | 7  | 0.76 | 1.20 | 1.57 | 0.98 | 1.29 | 0.92 | 1.20 | 0.80 | 1.05 | 0.72 | 0.95 | 0.81 | 1.06 | 55.02  | 8.95  |
| P70665-3 | Isoform 3 of Sialate O-acetyltransferase OS=Mus musculus GN=Siae - [SIAE_MOUSE]                                          | 3.85  | 3  | 1  | 1  | 2  | 1.00 | 0.86 | 0.87 | 1.09 | 1.09 | 0.76 | 0.76 | 0.80 | 0.80 | 0.84 | 0.84 | 0.76 | 0.76 | 43.86  | 5.86  |
| Q6PGE7   | Sodium-dependent proline transporter OS=Mus musculus GN=Slc6a7 PE=2 SV=1 - [SC6A7_MOUSE]                                 | 7.22  | 1  | 3  | 3  | 5  | 1.22 | 1.08 | 0.98 | 1.15 | 1.01 | 0.88 | 0.68 | 0.80 | 0.65 | 1.01 | 0.83 | 1.19 | 0.98 | 71.02  | 6.61  |
| P15864   | Histone H1.2 OS=Mus musculus GN=Hist1h1c PE=1 SV=2 - [H12_MOUSE]                                                         | 30.66 | 3  | 1  | 11 | 74 | 0.97 | 0.51 | 0.52 | 0.80 | 0.82 | 0.78 | 0.79 | 0.80 | 0.82 | 0.89 | 0.91 | 0.78 | 0.80 | 21.25  | 11.00 |
| B2RWC4   | Gm88 protein OS=Mus musculus GN=Lrcc73 PE=2 SV=1 - [B2RWC4_MOUSE]                                                        | 7.91  | 1  | 2  | 2  | 4  | 0.94 | 1.04 | 1.10 | 1.00 | 1.06 | 0.85 | 0.90 | 0.80 | 0.85 | 0.83 | 0.88 | 0.96 | 1.02 | 33.43  | 4.84  |



|          |                                                                                                                          |       |   |   |    |     |      |      |      |      |      |      |      |      |      |      |      |      |      |        |        |      |
|----------|--------------------------------------------------------------------------------------------------------------------------|-------|---|---|----|-----|------|------|------|------|------|------|------|------|------|------|------|------|------|--------|--------|------|
| Q9R1M5   | NACHT, LRR and PYD domains-containing protein 5<br>OS=Mus musculus<br>GN=Nlfp5 PE=1 SV=2<br>-[NALP5_MOUSE]               | 2.67  | 8 | 2 | 2  | 2   | 2    | 1.34 | 1.20 | 0.89 | 1.21 | 0.90 | 0.83 | 0.61 | 0.80 | 0.59 | 0.75 | 0.56 | 0.96 | 0.71   | 131.23 | 5.71 |
| Q6RKD8   | Fibronectin leucine rich transmembrane protein 1<br>OS=Mus musculus<br>GN=Flnt1 PE=2 SV=1<br>-[Q6RKD8_MOUSE]             | 3.12  | 1 | 1 | 2  | 2   | 1.02 | 1.27 | 1.24 | 1.32 | 1.29 | 0.89 | 0.87 | 0.80 | 0.78 | 1.03 | 1.01 | 0.81 | 0.79 | 74.10  | 6.60   |      |
| Q80YE7-2 | Isoform 2 of Death-associated protein kinase 1<br>OS=Mus musculus<br>GN=Dapk1<br>-[DAPK1_MOUSE]                          | 1.12  | 2 | 1 | 1  | 2   | 0.77 | 0.96 | 1.25 | 1.07 | 1.38 | 0.95 | 1.23 | 0.80 | 1.04 | 0.95 | 1.24 | 0.97 | 1.26 | 159.88 | 6.92   |      |
| Q5DTT2-2 | Isoform 2 of PH and SEC7 domain-containing protein 1<br>OS=Mus musculus<br>GN=Psd<br>-[PSD1_MOUSE]                       | 13.49 | 1 | 1 | 5  | 8   | 0.93 | 0.72 | 0.77 | 0.98 | 1.05 | 0.85 | 0.91 | 0.80 | 0.86 | 0.81 | 0.87 | 0.66 | 0.72 | 43.69  | 10.11  |      |
| P28028   | Serine/threonine-protein kinase B-raf<br>OS=Mus musculus<br>GN=Braf PE=1 SV=3<br>-[BRAF_MOUSE]                           | 12.06 | 4 | 2 | 7  | 13  | 1.24 | 1.10 | 0.88 | 1.12 | 0.90 | 0.95 | 0.83 | 0.80 | 0.77 | 0.87 | 0.78 | 1.02 | 0.92 | 88.72  | 7.65   |      |
| Q80Y73   | UPF0722 protein C11orf88 homolog<br>OS=Mus musculus<br>PE=2 SV=1<br>-[CK088_MOUSE]                                       | 4.17  | 1 | 1 | 1  | 1   | 0.94 | 1.07 | 1.14 | 0.94 | 1.00 | 0.79 | 0.83 | 0.80 | 0.85 | 0.81 | 0.87 | 0.82 | 0.87 | 19.06  | 9.00   |      |
| Q9CPP6   | NADH dehydrogenase [ubiquinone] 1 alpha subcomplex subunit 5<br>OS=Mus musculus<br>GN=Ndufa5 PE=1 SV=3<br>-[NDUA5_MOUSE] | 70.69 | 2 | 9 | 9  | 63  | 0.90 | 0.76 | 0.77 | 0.85 | 0.91 | 0.77 | 0.84 | 0.80 | 0.86 | 0.79 | 0.83 | 0.76 | 0.84 | 13.35  | 8.10   |      |
| Q8R151   | NFX1-type zinc finger-containing protein 1<br>OS=Mus musculus<br>GN=Znfx1 PE=2 SV=3<br>-[ZNFX1_MOUSE]                    | 1.15  | 4 | 2 | 2  | 3   | 0.91 | 1.03 | 1.13 | 0.97 | 1.07 | 0.90 | 0.99 | 0.80 | 0.88 | 0.82 | 0.91 | 0.83 | 0.92 | 218.69 | 7.47   |      |
| O08739   | AMP deaminase 3<br>OS=Mus musculus<br>GN=Ampd3 PE=2 SV=2<br>-[AMPD3_MOUSE]                                               | 6.92  | 6 | 5 | 5  | 8   | 1.04 | 1.13 | 1.13 | 0.98 | 0.92 | 0.86 | 0.89 | 0.80 | 0.75 | 0.86 | 0.78 | 1.18 | 1.23 | 88.60  | 7.33   |      |
| Q9CXY6   | Interleukin enhancer-binding factor 2<br>OS=Mus musculus<br>GN=Ilf2 PE=1 SV=1<br>-[ILF2_MOUSE]                           | 17.69 | 1 | 5 | 5  | 14  | 1.07 | 0.88 | 0.98 | 1.05 | 1.04 | 0.80 | 0.83 | 0.80 | 0.88 | 0.79 | 0.94 | 0.87 | 0.88 | 43.04  | 5.26   |      |
| Q810U4-2 | Isoform 2 of Neuronal cell adhesion molecule<br>OS=Mus musculus<br>GN=Nrcam<br>-[NRCAM_MOUSE]                            | 40.47 | 2 | 1 | 36 | 373 | 0.89 | 0.70 | 0.79 | 0.80 | 0.90 | 0.95 | 1.05 | 0.80 | 0.90 | 1.05 | 1.17 | 0.66 | 0.74 | 131.19 | 6.06   |      |
| P22892   | AP-1 complex subunit gamma-1<br>OS=Mus musculus<br>GN=Ap1g1 PE=1 SV=3<br>-[APIG1_MOUSE]                                  | 2.07  | 2 | 2 | 2  | 3   | 0.94 | 0.93 | 0.98 | 1.09 | 1.16 | 0.84 | 0.89 | 0.80 | 0.85 | 0.87 | 0.93 | 0.98 | 1.04 | 91.29  | 6.80   |      |

|          |                                                                                                                     |       |   |    |    |    |      |      |      |      |      |      |      |      |      |      |      |      |      |        |       |
|----------|---------------------------------------------------------------------------------------------------------------------|-------|---|----|----|----|------|------|------|------|------|------|------|------|------|------|------|------|------|--------|-------|
| Q8BU14   | Translocation protein SEC62 OS=Mus musculus GN=Sec62 PE=1 SV=1 - [SEC62_MOUSE]                                      | 11.06 | 1 | 3  | 3  | 9  | 0.97 | 1.03 | 0.99 | 1.19 | 1.19 | 0.90 | 0.90 | 0.80 | 0.78 | 0.90 | 0.88 | 0.87 | 0.82 | 45.55  | 7.31  |
| A2ARS0   | Ankyrin repeat domain-containing protein 63 OS=Mus musculus GN=Ankr63 PE=4 SV=1 - [ANR63_MOUSE]                     | 6.92  | 1 | 2  | 2  | 5  | 0.99 | 1.31 | 1.38 | 1.45 | 1.58 | 1.05 | 1.04 | 0.80 | 0.80 | 1.37 | 1.39 | 1.65 | 1.69 | 41.04  | 10.83 |
| Q6P5E4   | UDP-glucose:glycoprotein glucosyltransferase 1 OS=Mus musculus GN=Ugg1 PE=1 SV=4 - [UGG1_MOUSE]                     | 11.61 | 6 | 14 | 14 | 25 | 0.90 | 0.91 | 1.06 | 1.05 | 1.15 | 0.87 | 0.91 | 0.80 | 0.89 | 0.89 | 0.96 | 0.90 | 0.95 | 176.32 | 5.62  |
| Q3TMH2   | Secernin-3 OS=Mus musculus GN=Scrn3 PE=1 SV=1 - [SCRN3_MOUSE]                                                       | 19.62 | 2 | 7  | 7  | 17 | 0.98 | 0.78 | 0.76 | 1.02 | 0.96 | 0.86 | 0.79 | 0.80 | 0.69 | 0.83 | 0.85 | 0.91 | 0.82 | 47.63  | 5.66  |
| D3YXG2   | N-acetyl-D-glucosamine kinase OS=Mus musculus GN=Nagk PE=2 SV=1 - [D3YXG2_MOUSE]                                    | 12.76 | 3 | 3  | 3  | 5  | 0.98 | 1.02 | 1.11 | 1.02 | 1.04 | 0.66 | 0.78 | 0.80 | 0.77 | 0.95 | 0.97 | 1.11 | 0.94 | 36.18  | 5.59  |
| Q99KP3   | Lambda-crystallin homolog OS=Mus musculus GN=Cry11 PE=2 SV=3 - [CRY11_MOUSE]                                        | 32.60 | 1 | 6  | 6  | 9  | 1.10 | 1.16 | 1.00 | 0.99 | 0.90 | 0.97 | 0.83 | 0.80 | 0.75 | 0.97 | 0.75 | 0.87 | 0.79 | 35.19  | 5.86  |
| H3BKN2   | Alkylidihydroxyacetone phosphate synthase, peroxisomal OS=Mus musculus GN=Agps PE=2 SV=1 - [H3BKN2_MOUSE]           | 1.94  | 3 | 1  | 1  | 2  | 0.92 | 1.02 | 1.11 | 1.08 | 1.18 | 0.81 | 0.87 | 0.80 | 0.87 | 0.92 | 1.00 | 1.13 | 1.24 | 63.80  | 6.95  |
| O88543   | COP9 signalosome complex subunit 3 OS=Mus musculus GN=Cops3 PE=1 SV=3 - [CSN3_MOUSE]                                | 14.66 | 1 | 5  | 5  | 19 | 0.90 | 0.93 | 0.98 | 0.97 | 1.04 | 0.84 | 0.92 | 0.80 | 0.88 | 0.79 | 0.88 | 0.87 | 1.00 | 47.80  | 6.65  |
| Q99J39-2 | Isoform Cytoplasmic+peroxisomal of Malonyl-CoA decarboxylase, mitochondrial OS=Mus musculus GN=Mlycd - [DCMC_MOUSE] | 7.49  | 2 | 2  | 2  | 3  | 1.01 | 1.83 | 1.82 | 1.08 | 1.07 | 0.95 | 0.94 | 0.80 | 0.80 | 0.92 | 0.92 | 1.05 | 1.04 | 50.73  | 7.88  |
| Q60823   | RAC-beta serine/threonine-protein kinase OS=Mus musculus GN=Akt2 PE=1 SV=1 - [AKT2_MOUSE]                           | 7.90  | 7 | 1  | 3  | 6  | 1.02 | 1.05 | 1.02 | 1.06 | 1.03 | 0.78 | 0.76 | 0.80 | 0.78 | 0.81 | 0.79 | 0.82 | 0.80 | 55.71  | 6.37  |
| Q6PB66   | Leucine-rich PPR motif-containing protein, mitochondrial OS=Mus musculus GN=Lpprc PE=1 SV=2 - [LPPRC_MOUSE]         | 20.04 | 2 | 20 | 20 | 42 | 1.01 | 1.13 | 1.20 | 1.28 | 1.25 | 0.87 | 0.89 | 0.80 | 0.80 | 0.92 | 0.92 | 0.97 | 1.00 | 156.52 | 6.83  |

|        |                                                                                                                                           |       |   |   |    |     |      |      |      |      |      |      |      |      |      |      |      |      |      |        |      |
|--------|-------------------------------------------------------------------------------------------------------------------------------------------|-------|---|---|----|-----|------|------|------|------|------|------|------|------|------|------|------|------|------|--------|------|
| O70340 | Neuronal pentraxin-2<br>OS=Mus musculus<br>GN=Nptx2 PE=2<br>SV=1 -<br>[NPTX2_MOUSE]                                                       | 29.37 | 1 | 9 | 9  | 22  | 0.98 | 0.94 | 0.98 | 0.85 | 0.87 | 0.77 | 0.79 | 0.80 | 0.73 | 0.74 | 0.83 | 0.76 | 0.79 | 47.11  | 5.81 |
| D3YWV5 | Semaphorin-4A<br>OS=Mus musculus<br>GN=Sema4a PE=2<br>SV=1 -<br>[D3YWV5_MOUSE]                                                            | 6.53  | 4 | 3 | 3  | 10  | 1.10 | 0.96 | 0.84 | 1.10 | 1.01 | 0.78 | 0.64 | 0.80 | 0.73 | 0.85 | 0.83 | 0.90 | 0.81 | 68.88  | 7.33 |
| Q8VD37 | SH3-containing GRB2-<br>like protein 3-<br>interacting protein 1<br>OS=Mus musculus<br>GN=Sgip1 PE=1 SV=1<br>-[SGIP1_MOUSE]               | 52.85 | 5 | 1 | 29 | 154 | 0.76 | 1.11 | 1.45 | 0.96 | 1.26 | 0.85 | 1.11 | 0.80 | 1.05 | 0.72 | 0.95 | 0.77 | 1.01 | 86.01  | 7.87 |
| F6QP00 | WD repeat domain<br>phosphoinositide-<br>interacting protein 4<br>(Fragment) OS=Mus<br>musculus GN=Wdr45<br>PE=2 SV=1 -<br>[F6QP00_MOUSE] | 12.82 | 7 | 1 | 1  | 3   | 0.92 | 1.08 | 1.17 | 0.95 | 1.03 | 0.81 | 0.87 | 0.80 | 0.87 | 0.78 | 0.85 | 0.89 | 0.97 | 8.54   | 6.10 |
| Q3UX43 | Ankyrin repeat domain-<br>containing protein 13C<br>OS=Mus musculus<br>GN=Ankrd13c PE=2<br>SV=2 -<br>[AN13C_MOUSE]                        | 2.40  | 1 | 1 | 1  | 2   | 1.00 | 1.47 | 1.46 | 0.94 | 0.93 | 0.84 | 0.84 | 0.81 | 0.80 | 0.86 | 0.86 | 0.90 | 0.90 | 60.11  | 6.90 |
| Q9CQF4 | Uncharacterized<br>protein Coorf203<br>homolog OS=Mus<br>musculus PE=1 SV=1 -<br>[CF203_MOUSE]                                            | 19.17 | 2 | 5 | 5  | 50  | 1.03 | 0.83 | 0.77 | 0.85 | 0.81 | 0.86 | 0.78 | 0.81 | 0.79 | 0.74 | 0.65 | 0.70 | 0.66 | 27.83  | 9.36 |
| L7N479 | Protein Tcrg-C3<br>OS=Mus musculus<br>GN=Tcrg-C3 PE=4<br>SV=1 -<br>[L7N479_MOUSE]                                                         | 8.72  | 2 | 1 | 1  | 1   | 0.97 | 0.88 | 0.90 | 0.94 | 0.97 | 1.07 | 1.10 | 0.81 | 0.83 | 0.91 | 0.94 | 0.82 | 0.85 | 19.77  | 8.84 |
| Q9CPQ8 | ATP synthase subunit<br>g, mitochondrial<br>OS=Mus musculus<br>GN=Atp5l PE=1 SV=1<br>-[ATP5L_MOUSE]                                       | 48.54 | 3 | 4 | 4  | 33  | 0.96 | 0.99 | 1.06 | 1.17 | 1.17 | 0.86 | 0.91 | 0.81 | 0.85 | 0.93 | 0.96 | 0.92 | 0.98 | 11.42  | 9.74 |
| O08582 | GTP-binding protein 1<br>OS=Mus musculus<br>GN=Gtbp1 PE=1<br>SV=2 -<br>[GTPB1_MOUSE]                                                      | 5.24  | 1 | 3 | 3  | 6   | 0.93 | 0.64 | 0.68 | 1.10 | 1.16 | 0.89 | 0.95 | 0.81 | 0.87 | 0.82 | 0.88 | 0.94 | 1.00 | 72.25  | 8.29 |
| P98064 | Mannan-binding lectin<br>serine protease 1<br>OS=Mus musculus<br>GN=Masp1 PE=1<br>SV=2 -<br>[MASP1_MOUSE]                                 | 1.99  | 2 | 1 | 1  | 1   | 1.39 | 0.81 | 0.58 | 0.85 | 0.61 | 1.12 | 0.80 | 0.81 | 0.58 | 1.31 | 0.94 | 1.04 | 0.75 | 79.92  | 5.55 |
| Q8R0G9 | Nuclear pore complex<br>protein Nup133<br>OS=Mus musculus<br>GN=Nup133 PE=1<br>SV=2 -<br>[NU133_MOUSE]                                    | 2.86  | 1 | 2 | 2  | 5   | 0.70 | 0.89 | 1.26 | 1.14 | 1.55 | 0.88 | 1.33 | 0.81 | 1.06 | 0.93 | 1.04 | 1.09 | 1.21 | 128.54 | 5.20 |

|          |                                                                                                                                               |       |   |   |    |    |      |      |      |      |      |      |      |      |      |      |      |      |      |        |      |
|----------|-----------------------------------------------------------------------------------------------------------------------------------------------|-------|---|---|----|----|------|------|------|------|------|------|------|------|------|------|------|------|------|--------|------|
| O09161   | Calsequestrin-2<br>OS=Mus musculus<br>GN=Casq2 PE=2<br>SV=3 -<br>[CASQ2_MOUSE]                                                                | 5.06  | 3 | 2 | 2  | 3  | 0.91 | 0.79 | 0.86 | 0.79 | 0.86 | 0.69 | 0.76 | 0.81 | 0.88 | 0.63 | 0.69 | 0.74 | 0.82 | 48.15  | 4.27 |
| P21836   | Acetylcholinesterase<br>OS=Mus musculus<br>GN=Ache PE=1 SV=1 -<br>[ACES_MOUSE]                                                                | 17.92 | 1 | 7 | 7  | 19 | 1.12 | 1.29 | 1.15 | 1.18 | 1.06 | 0.82 | 0.72 | 0.81 | 0.70 | 0.98 | 0.88 | 1.21 | 1.06 | 68.13  | 6.33 |
| Q8K211   | Protein<br>farnesyltransferase<br>subunit beta OS=Mus<br>musculus GN=Frtb<br>PE=1 SV=1 -<br>[FNTB_MOUSE]                                      | 2.06  | 2 | 1 | 1  | 1  | 0.89 | 1.01 | 1.13 | 1.01 | 1.13 | 0.76 | 0.85 | 0.81 | 0.90 | 1.00 | 1.13 | 0.85 | 0.95 | 48.79  | 5.80 |
| P17047   | Lysosome-associated<br>membrane glycoprotein<br>2 OS=Mus musculus<br>GN=Lamp2 PE=2<br>SV=2 -<br>[LAMP2_MOUSE]                                 | 2.17  | 3 | 1 | 1  | 3  | 0.81 | 0.85 | 1.06 | 0.88 | 1.09 | 0.83 | 1.02 | 0.81 | 1.00 | 0.71 | 0.88 | 1.22 | 1.52 | 45.65  | 7.39 |
| Q3TAA7   | Serine/threonine-<br>protein kinase 11-<br>interacting protein<br>OS=Mus musculus<br>GN=Stk11ip PE=1<br>SV=1 -<br>[S11IP_MOUSE]               | 1.31  | 1 | 1 | 1  | 2  | 0.94 | 1.07 | 1.13 | 1.08 | 1.14 | 0.78 | 0.83 | 0.81 | 0.85 | 0.99 | 1.06 | 1.08 | 1.15 | 117.93 | 4.96 |
| P61226   | Ras-related protein Rap<br>2b OS=Mus musculus<br>GN=Rap2b PE=1<br>SV=1 -<br>[RAP2B_MOUSE]                                                     | 67.76 | 2 | 5 | 10 | 43 | 1.00 | 0.91 | 0.86 | 1.05 | 1.03 | 0.89 | 0.85 | 0.81 | 0.79 | 0.82 | 0.79 | 0.86 | 0.85 | 20.49  | 4.81 |
| Q8CE96-2 | Isoform 3 of tRNA<br>(adenine(58)-N(1))-<br>methyltransferase non-<br>catalytic subunit TRM6<br>OS=Mus musculus<br>GN=Trmt6 -<br>[TRM6_MOUSE] | 3.50  | 2 | 1 | 1  | 2  | 1.19 | 1.18 | 0.99 | 1.06 | 0.89 | 0.94 | 0.78 | 0.81 | 0.67 | 0.84 | 0.70 | 1.15 | 0.97 | 34.78  | 5.63 |
| O54828   | Regulator of G-protein<br>signaling 9 OS=Mus<br>musculus GN=Rgs9<br>PE=1 SV=3 -<br>[RGS9_MOUSE]                                               | 8.30  | 4 | 5 | 6  | 11 | 0.92 | 1.34 | 1.48 | 1.31 | 1.55 | 1.00 | 1.20 | 0.81 | 0.80 | 1.27 | 1.58 | 1.70 | 1.78 | 76.93  | 9.33 |
| Q9QZ88-2 | Isoform 2 of Vacuolar<br>protein sorting-<br>associated protein 29<br>OS=Mus musculus<br>GN=Vps29 -<br>[VPS29_MOUSE]                          | 43.55 | 2 | 1 | 6  | 23 | 0.87 | 0.77 | 0.89 | 0.79 | 0.90 | 0.71 | 0.81 | 0.81 | 0.93 | 0.88 | 1.01 | 0.92 | 1.06 | 20.90  | 7.05 |
| P62965   | Cellular retinoic acid-<br>binding protein 1<br>OS=Mus musculus<br>GN=Crap1 PE=1<br>SV=2 -<br>[RABP1_MOUSE]                                   | 9.49  | 1 | 1 | 1  | 9  | 1.15 | 1.12 | 0.88 | 0.86 | 0.73 | 1.06 | 0.88 | 0.81 | 0.73 | 1.47 | 1.33 | 2.19 | 1.85 | 15.58  | 5.38 |
| Q9R0N8-2 | Isoform 2 of<br>Synaptotagmin-6<br>OS=Mus musculus<br>GN=Sy16 -<br>[SYT6_MOUSE]                                                               | 7.51  | 4 | 2 | 2  | 3  | 1.58 | 0.98 | 0.70 | 1.44 | 0.91 | 1.21 | 0.76 | 0.81 | 0.58 | 1.31 | 0.83 | 1.37 | 0.99 | 48.31  | 8.43 |

|        |                                                                                                                              |       |    |    |    |     |      |      |      |      |      |      |      |      |      |      |      |      |      |        |      |
|--------|------------------------------------------------------------------------------------------------------------------------------|-------|----|----|----|-----|------|------|------|------|------|------|------|------|------|------|------|------|------|--------|------|
| F6RMJ1 | SUN domain-containing protein 1 (Fragment) OS=Mus musculus GN=Sun1 PE=4 SV=1 - [F6RMJ1_MOUSE]                                | 10.85 | 6  | 2  | 2  | 8   | 1.08 | 1.10 | 0.99 | 1.07 | 0.94 | 0.90 | 0.80 | 0.81 | 0.76 | 0.83 | 0.76 | 0.98 | 0.94 | 28.99  | 5.07 |
| Q64444 | Carbonic anhydrase 4 OS=Mus musculus GN=Cs4 PE=1 SV=1 - [CAH4_MOUSE]                                                         | 29.18 | 2  | 9  | 9  | 28  | 0.98 | 0.88 | 0.92 | 0.97 | 0.98 | 0.75 | 0.79 | 0.81 | 0.82 | 0.72 | 0.74 | 0.72 | 0.77 | 34.33  | 8.21 |
| D3YZN4 | Paraplegin OS=Mus musculus GN=Spg7 PE=2 SV=1 - [D3YZN4_MOUSE]                                                                | 4.88  | 6  | 3  | 3  | 6   | 1.10 | 0.87 | 0.79 | 1.12 | 1.08 | 0.98 | 0.81 | 0.81 | 0.84 | 0.72 | 0.65 | 0.92 | 0.80 | 74.96  | 7.40 |
| Q9CXT7 | Isoform 2 of Transmembrane protein 192 OS=Mus musculus GN=Tmem192 - [TM192_MOUSE]                                            | 6.79  | 2  | 1  | 1  | 2   | 1.10 | 1.35 | 1.23 | 1.12 | 1.01 | 0.76 | 0.69 | 0.81 | 0.73 | 0.84 | 0.77 | 0.91 | 0.83 | 25.38  | 9.14 |
| Q8BRF7 | Isoform 3 of Sec1 family domain-containing protein 1 OS=Mus musculus GN=Scfd1 - [SCFD1_MOUSE]                                | 16.75 | 3  | 6  | 6  | 10  | 0.92 | 1.12 | 1.31 | 1.11 | 1.20 | 0.95 | 1.02 | 0.81 | 0.91 | 0.91 | 1.02 | 1.01 | 1.09 | 67.36  | 5.74 |
| Q8BP71 | Isoform 6 of RNA binding protein fox-1 homolog 2 OS=Mus musculus GN=Rbfox2 - [RFOX2_MOUSE]                                   | 17.90 | 9  | 1  | 6  | 11  | 1.19 | 1.23 | 1.03 | 1.01 | 0.84 | 0.64 | 0.53 | 0.81 | 0.68 | 0.82 | 0.69 | 0.83 | 0.69 | 37.88  | 7.20 |
| Q9CZT8 | Ras-related protein Rab3B OS=Mus musculus GN=Rab3b PE=1 SV=1 - [RAB3B_MOUSE]                                                 | 53.88 | 11 | 5  | 10 | 106 | 1.17 | 0.93 | 0.85 | 1.10 | 0.92 | 1.04 | 0.92 | 0.81 | 0.68 | 1.00 | 0.87 | 1.01 | 0.85 | 24.74  | 5.11 |
| Q7TRP3 | Olfactory receptor 670 OS=Mus musculus GN=Olfr670 PE=3 SV=1 - [Q7TRP3_MOUSE]                                                 | 8.33  | 1  | 1  | 1  | 2   | 0.98 | 1.15 | 1.18 | 1.15 | 1.17 | 0.76 | 0.78 | 0.81 | 0.82 | 0.71 | 0.72 | 0.86 | 0.88 | 35.24  | 9.23 |
| Q8VC30 | Bifunctional ATP-dependent dihydroxyacetone kinase/FAD-AMP lyase (cyclizing) OS=Mus musculus GN=Dak PE=2 SV=1 - [DHAK_MOUSE] | 2.42  | 1  | 1  | 1  | 2   | 0.96 | 1.06 | 1.10 | 1.09 | 1.14 | 0.85 | 0.88 | 0.81 | 0.84 | 0.90 | 0.93 | 1.04 | 1.08 | 59.65  | 6.92 |
| O54950 | 5'-AMP-activated protein kinase subunit gamma-1 OS=Mus musculus GN=Prkag1 PE=1 SV=2 - [AAKG1_MOUSE]                          | 23.64 | 6  | 5  | 7  | 12  | 1.01 | 1.02 | 1.01 | 1.00 | 0.97 | 0.85 | 0.80 | 0.81 | 0.73 | 0.86 | 0.85 | 0.85 | 0.83 | 37.50  | 7.14 |
| Q5SQX6 | Cytoplasmic FMR1-interacting protein 2 OS=Mus musculus GN=Cyfp2 PE=1 SV=2 - [CYFP2_MOUSE]                                    | 20.91 | 4  | 13 | 22 | 49  | 0.96 | 1.09 | 1.11 | 1.18 | 1.19 | 0.93 | 0.93 | 0.81 | 0.88 | 0.93 | 1.00 | 1.07 | 1.08 | 145.56 | 7.05 |
| Q8CGA0 | Protein phosphatase 1F OS=Mus musculus GN=Ppm1f PE=2 SV=1 - [PPM1F_MOUSE]                                                    | 15.71 | 1  | 4  | 4  | 8   | 1.08 | 1.02 | 0.96 | 1.02 | 1.13 | 0.95 | 0.92 | 0.81 | 0.91 | 0.86 | 0.95 | 1.02 | 1.04 | 49.58  | 5.30 |

|          |                                                                                                                    |       |   |    |    |    |      |      |      |      |      |      |      |      |      |      |      |      |      |       |      |
|----------|--------------------------------------------------------------------------------------------------------------------|-------|---|----|----|----|------|------|------|------|------|------|------|------|------|------|------|------|------|-------|------|
| B9EHT4   | CAP-Gly domain-containing linker protein 3 OS=Mus musculus GN=Clip3 PE=1 SV=1 - [CLIP3_MOUSE]                      | 1.46  | 1 | 1  | 1  | 2  | 1.20 | 1.14 | 0.95 | 1.09 | 0.91 | 0.97 | 0.81 | 0.81 | 0.67 | 0.84 | 0.70 | 0.88 | 0.74 | 59.55 | 7.94 |
| Q99P58   | Ras-related protein Rab27B OS=Mus musculus GN=Rab27b PE=1 SV=3 - [RB27B_MOUSE]                                     | 22.94 | 2 | 4  | 4  | 8  | 1.32 | 1.30 | 0.82 | 1.20 | 0.94 | 0.92 | 0.63 | 0.81 | 0.57 | 1.01 | 0.69 | 0.91 | 0.78 | 24.54 | 5.54 |
| Q9EQ06   | Estradiol 17-beta-dehydrogenase 11 OS=Mus musculus GN=Hsd17b11 PE=2 SV=1 - [DHB11_MOUSE]                           | 25.17 | 5 | 6  | 6  | 12 | 1.03 | 0.95 | 0.86 | 1.04 | 1.02 | 0.87 | 0.74 | 0.81 | 0.75 | 0.94 | 0.91 | 1.03 | 0.98 | 32.86 | 8.66 |
| Q8BH86   | Isoform 2 of UPP0317 protein C14orf159 homolog, mitochondrial OS=Mus musculus - [CN159_MOUSE]                      | 10.70 | 3 | 5  | 5  | 9  | 0.97 | 0.99 | 1.01 | 0.99 | 1.05 | 0.73 | 0.80 | 0.81 | 0.89 | 0.84 | 0.93 | 0.89 | 0.98 | 61.21 | 7.44 |
| Q9CYW4   | Haloacid dehalogenase-like hydrolase domain-containing protein 3 OS=Mus musculus GN=Hhd3 PE=2 SV=1 - [HDHD3_MOUSE] | 4.78  | 1 | 1  | 1  | 2  | 0.99 | 1.07 | 1.08 | 1.15 | 1.16 | 0.90 | 0.90 | 0.81 | 0.82 | 0.98 | 0.99 | 0.79 | 0.80 | 28.01 | 6.80 |
| Q8VE47   | Ubiquitin-like modifier-activating enzyme 5 OS=Mus musculus GN=Uba5 PE=2 SV=2 - [UBA5_MOUSE]                       | 34.99 | 3 | 7  | 7  | 13 | 0.92 | 0.96 | 1.03 | 1.03 | 1.18 | 0.94 | 1.02 | 0.81 | 0.92 | 0.97 | 1.01 | 1.03 | 1.08 | 44.76 | 4.96 |
| Q8BLY2   | Probable threonine--tRNA ligase 2, cytoplasmic OS=Mus musculus GN=Tars12 PE=2 SV=1 - [SYTC2_MOUSE]                 | 11.77 | 1 | 8  | 8  | 12 | 0.93 | 0.87 | 0.92 | 1.00 | 1.05 | 0.78 | 0.84 | 0.81 | 0.94 | 0.81 | 0.95 | 0.79 | 0.85 | 91.26 | 7.53 |
| Q9WUL7   | ADP-ribosylation factor-like protein 3 OS=Mus musculus GN=Arl3 PE=1 SV=1 - [ARL3_MOUSE]                            | 64.29 | 1 | 9  | 9  | 29 | 0.93 | 0.87 | 0.90 | 0.92 | 0.97 | 0.77 | 0.82 | 0.81 | 0.86 | 0.74 | 0.77 | 0.73 | 0.87 | 20.47 | 7.24 |
| D6RIL4   | Methylosome protein 50 OS=Mus musculus GN=Wdr77 PE=2 SV=1 - [D6RIL4_MOUSE]                                         | 21.67 | 2 | 1  | 1  | 2  | 1.03 | 0.85 | 0.82 | 0.97 | 0.94 | 0.89 | 0.86 | 0.81 | 0.78 | 0.90 | 0.87 | 0.82 | 0.80 | 6.75  | 9.31 |
| Q6PA06-2 | Isoform 2 of Atlastin-2 OS=Mus musculus GN=At12 - [ATLA2_MOUSE]                                                    | 16.49 | 3 | 4  | 5  | 14 | 0.94 | 1.07 | 1.05 | 1.04 | 1.13 | 0.97 | 0.99 | 0.81 | 0.90 | 0.91 | 1.01 | 0.97 | 1.03 | 44.33 | 6.21 |
| Q9DCN2   | Isoform 2 of NADH-cytochrome b5 reductase 3 OS=Mus musculus GN=Cyb5r3 - [NBSR3_MOUSE]                              | 48.92 | 4 | 11 | 11 | 31 | 1.08 | 0.99 | 0.91 | 1.15 | 0.99 | 0.86 | 0.79 | 0.81 | 0.75 | 0.97 | 0.86 | 1.08 | 0.97 | 31.53 | 8.38 |

|          |                                                                                                                                      |       |   |    |    |    |      |      |      |      |      |      |      |      |      |      |      |      |      |       |      |
|----------|--------------------------------------------------------------------------------------------------------------------------------------|-------|---|----|----|----|------|------|------|------|------|------|------|------|------|------|------|------|------|-------|------|
| Q80TI0-2 | Isoform 2 of GRAM domain-containing protein 1B OS=Mus musculus GN=Gramd1b - [GRM1B_MOUSE]                                            | 3.30  | 6 | 2  | 2  | 6  | 1.16 | 0.89 | 0.95 | 1.18 | 1.26 | 0.84 | 1.01 | 0.81 | 0.87 | 1.00 | 0.86 | 1.31 | 1.13 | 80.98 | 5.78 |
| Q9WUT3   | Ribosomal protein S6 kinase alpha-2 OS=Mus musculus GN=Rps6ka2 PE=2 SV=1 - [KS6A2_MOUSE]                                             | 1.36  | 1 | 1  | 1  | 2  | 0.95 | 0.99 | 1.04 | 1.04 | 1.10 | 0.99 | 1.04 | 0.81 | 0.86 | 1.13 | 1.19 | 1.30 | 1.38 | 83.10 | 8.50 |
| Q6NSS2   | Diacylglycerol kinase beta OS=Mus musculus GN=Dgkb PE=2 SV=2 - [DGKB_MOUSE]                                                          | 14.96 | 1 | 1  | 10 | 20 | 0.76 | 0.72 | 0.94 | 0.96 | 1.26 | 0.92 | 1.20 | 0.81 | 1.06 | 0.99 | 1.30 | 1.07 | 1.41 | 90.21 | 7.93 |
| Q6RI63-2 | Isoform 2 of Constitutive coactivator of peroxisome proliferator-activated receptor gamma OS=Mus musculus GN=Fam120b - [F120B_MOUSE] | 1.82  | 2 | 1  | 1  | 1  | 1.16 | 0.78 | 0.67 | 1.17 | 1.01 | 0.81 | 0.70 | 0.81 | 0.70 | 0.89 | 0.77 | 1.03 | 0.89 | 55.79 | 5.43 |
| Q8JZQ2   | AFG3-like protein 2 OS=Mus musculus GN=Afg3l2 PE=1 SV=1 - [AFG32_MOUSE]                                                              | 22.19 | 3 | 15 | 15 | 24 | 1.00 | 1.03 | 1.05 | 1.13 | 1.12 | 0.89 | 0.89 | 0.81 | 0.86 | 0.85 | 0.86 | 0.88 | 0.88 | 89.46 | 8.60 |
| Q91YR1   | Twinfilin-1 OS=Mus musculus GN=Twf1 PE=1 SV=2 - [TWF1_MOUSE]                                                                         | 29.14 | 2 | 7  | 7  | 23 | 0.93 | 0.86 | 0.90 | 1.01 | 1.01 | 0.86 | 0.85 | 0.81 | 0.85 | 0.90 | 0.93 | 0.89 | 0.87 | 40.05 | 6.67 |
| Q9CX56   | 26S proteasome non-ATPase regulatory subunit 8 OS=Mus musculus GN=Psm8 PE=1 SV=2 - [PSMD8_MOUSE]                                     | 18.70 | 1 | 4  | 4  | 8  | 0.94 | 0.81 | 0.96 | 1.14 | 1.12 | 0.93 | 0.99 | 0.81 | 0.96 | 0.85 | 1.02 | 0.93 | 1.12 | 39.90 | 9.58 |
| P32261   | Antithrombin-III OS=Mus musculus GN=Serpinc1 PE=1 SV=1 - [ANT3_MOUSE]                                                                | 5.38  | 1 | 2  | 2  | 5  | 1.05 | 1.00 | 0.92 | 0.58 | 0.55 | 0.83 | 0.73 | 0.81 | 0.71 | 0.83 | 0.79 | 0.88 | 0.76 | 51.97 | 6.46 |
| Q3TVF4   | Geranylgeranyl transferase type-2 subunit beta OS=Mus musculus GN=Rabggtb PE=2 SV=1 - [Q3TVF4_MOUSE]                                 | 7.25  | 2 | 2  | 2  | 4  | 0.97 | 0.89 | 0.92 | 1.11 | 1.14 | 0.85 | 0.87 | 0.81 | 0.84 | 0.88 | 0.91 | 0.88 | 0.91 | 36.86 | 5.08 |
| Q5V038   | Tetrapeptide repeat protein 9A OS=Mus musculus GN=Ttc9 PE=2 SV=1 - [TTC9A_MOUSE]                                                     | 41.10 | 1 | 6  | 7  | 16 | 0.88 | 0.96 | 1.04 | 0.86 | 1.00 | 0.76 | 0.86 | 0.81 | 0.94 | 0.70 | 0.78 | 0.73 | 0.81 | 24.34 | 8.85 |
| Q8BH58   | TIP41-like protein OS=Mus musculus GN=Tipr1 PE=2 SV=1 - [TIPRL_MOUSE]                                                                | 26.57 | 1 | 4  | 4  | 10 | 0.96 | 0.90 | 1.03 | 0.93 | 0.98 | 0.95 | 1.01 | 0.82 | 0.82 | 1.03 | 0.99 | 1.06 | 1.11 | 31.23 | 5.63 |

|        |                                                                                                                                      |       |   |    |    |     |      |      |      |      |      |      |      |      |      |      |      |      |      |       |      |
|--------|--------------------------------------------------------------------------------------------------------------------------------------|-------|---|----|----|-----|------|------|------|------|------|------|------|------|------|------|------|------|------|-------|------|
| Q8R3V2 | Aminoacyl tRNA synthase complex-interacting multifunctional protein 2 OS=Mus musculus GN=Aimp2 PE=2 SV=1 - [Q8R3V2_MOUSE]            | 16.07 | 2 | 2  | 2  | 3   | 0.94 | 0.88 | 0.93 | 0.90 | 0.95 | 0.79 | 0.84 | 0.82 | 0.84 | 1.06 | 1.12 | 0.89 | 0.95 | 31.08 | 7.46 |
| Q60625 | Intercellular adhesion molecule 5 OS=Mus musculus GN=Icam5 PE=1 SV=2 - [ICAM5_MOUSE]                                                 | 24.97 | 1 | 17 | 17 | 115 | 0.99 | 1.07 | 1.07 | 0.98 | 1.00 | 0.81 | 0.87 | 0.82 | 0.84 | 0.81 | 0.82 | 0.87 | 0.92 | 96.88 | 6.32 |
| E0CZE0 | NEDD8-activating enzyme E1 regulatory subunit OS=Mus musculus GN=Nae1 PE=2 SV=1 - [E0CZE0_MOUSE]                                     | 22.75 | 2 | 8  | 8  | 49  | 1.00 | 1.08 | 1.09 | 0.95 | 1.00 | 0.99 | 1.01 | 0.82 | 0.88 | 0.94 | 0.92 | 0.94 | 1.06 | 57.58 | 5.85 |
| P16125 | L-lactate dehydrogenase B chain OS=Mus musculus GN=Ldhh PE=1 SV=2 - [LDHB_MOUSE]                                                     | 66.77 | 2 | 17 | 19 | 224 | 0.99 | 0.96 | 0.99 | 1.06 | 1.07 | 0.82 | 0.85 | 0.82 | 0.81 | 0.86 | 0.89 | 0.87 | 0.88 | 36.55 | 6.05 |
| Q3TXY2 | Protein Tex264 OS=Mus musculus GN=Tex264 PE=2 SV=1 - [Q3TXY2_MOUSE]                                                                  | 8.12  | 2 | 2  | 2  | 3   | 1.06 | 1.11 | 1.05 | 1.26 | 1.19 | 1.01 | 0.95 | 0.82 | 0.77 | 1.23 | 1.17 | 1.14 | 1.08 | 28.99 | 5.07 |
| A2AUF7 | Rab9 effector protein with kelch motifs OS=Mus musculus GN=Rabepk PE=2 SV=1 - [A2AUF7_MOUSE]                                         | 8.72  | 3 | 2  | 2  | 8   | 0.99 | 1.07 | 1.11 | 0.89 | 0.89 | 0.72 | 0.71 | 0.82 | 0.82 | 0.74 | 0.74 | 1.01 | 1.02 | 34.56 | 5.54 |
| Q9QXK7 | Cleavage and polyadenylation specificity factor subunit 3 OS=Mus musculus GN=Cpsf3 PE=1 SV=2 - [CPSF3_MOUSE]                         | 5.12  | 1 | 3  | 3  | 6   | 0.94 | 1.16 | 1.20 | 0.83 | 0.88 | 0.90 | 0.94 | 0.82 | 0.89 | 0.82 | 0.94 | 0.81 | 0.87 | 77.46 | 5.60 |
| P47708 | Rabphilin-3A OS=Mus musculus GN=Rph3a PE=1 SV=2 - [RP3A_MOUSE]                                                                       | 60.79 | 2 | 35 | 36 | 341 | 1.03 | 0.96 | 0.91 | 0.97 | 0.93 | 0.78 | 0.78 | 0.82 | 0.79 | 0.75 | 0.74 | 0.71 | 0.69 | 75.44 | 8.27 |
| O08914 | Fatty-acid amide hydrolase 1 OS=Mus musculus GN=Faah PE=2 SV=1 - [FAAH1_MOUSE]                                                       | 6.56  | 1 | 3  | 3  | 3   | 0.95 | 0.85 | 0.89 | 1.12 | 1.21 | 0.86 | 1.32 | 0.82 | 1.12 | 1.04 | 1.11 | 0.97 | 1.03 | 63.18 | 7.87 |
| Q8BHF7 | CDP-diacylglycerol-3-glycerol-3-phosphate 3-phosphatidyltransferase, mitochondrial OS=Mus musculus GN=Pgs1 PE=2 SV=1 - [PGPS1_MOUSE] | 2.53  | 1 | 1  | 1  | 2   | 0.91 | 1.19 | 1.30 | 1.05 | 1.16 | 0.66 | 0.72 | 0.82 | 0.89 | 0.79 | 0.87 | 0.93 | 1.03 | 62.45 | 8.90 |
| Q8BGE6 | Cysteine protease ATG4B OS=Mus musculus GN=Atg4b PE=1 SV=2 - [ATG4B_MOUSE]                                                           | 8.14  | 2 | 2  | 2  | 4   | 0.90 | 0.86 | 0.95 | 1.03 | 1.15 | 0.85 | 0.94 | 0.82 | 0.91 | 0.85 | 0.95 | 0.91 | 1.01 | 44.35 | 5.07 |



|        |                                                                                                               |       |   |    |    |     |      |      |      |      |      |      |      |      |      |      |      |      |      |        |      |
|--------|---------------------------------------------------------------------------------------------------------------|-------|---|----|----|-----|------|------|------|------|------|------|------|------|------|------|------|------|------|--------|------|
| Q9DCL2 | MIP18 family protein FAM96A OS=Mus musculus GN=Fam96a PE=2 SV=1 - [FA96A_MOUSE]                               | 5.63  | 1 | 1  | 1  | 2   | 0.89 | 0.98 | 1.10 | 0.84 | 0.95 | 1.02 | 1.14 | 0.82 | 0.92 | 0.83 | 0.94 | 0.91 | 1.03 | 18.41  | 4.82 |
| P59325 | Eukaryotic translation initiation factor 5 OS=Mus musculus GN=Eif5 PE=1 SV=1 - [IF5_MOUSE]                    | 35.20 | 1 | 15 | 15 | 38  | 0.85 | 0.73 | 0.81 | 0.83 | 0.92 | 0.80 | 0.89 | 0.82 | 0.92 | 0.71 | 0.83 | 0.72 | 0.81 | 48.94  | 5.52 |
| O08688 | Calpain-5 OS=Mus musculus GN=Capn5 PE=2 SV=1 - [CANS_MOUSE]                                                   | 19.84 | 1 | 9  | 9  | 23  | 0.91 | 0.98 | 1.10 | 1.12 | 1.18 | 0.84 | 0.88 | 0.82 | 0.88 | 0.91 | 0.96 | 0.86 | 0.92 | 72.91  | 7.36 |
| Q9CT10 | Ran-binding protein 3 OS=Mus musculus GN=Ranbp3 PE=1 SV=2 - [RANB3_MOUSE]                                     | 31.98 | 1 | 13 | 13 | 41  | 1.00 | 0.90 | 0.88 | 0.89 | 0.89 | 0.72 | 0.77 | 0.82 | 0.80 | 0.71 | 0.69 | 0.68 | 0.71 | 52.54  | 5.12 |
| D3YVU0 | Ubiquitin carboxyl-terminal hydrolase 46 OS=Mus musculus GN=Usp46 PE=2 SV=1 - [D3YVU0_MOUSE]                  | 12.39 | 2 | 2  | 3  | 5   | 0.98 | 0.72 | 0.74 | 0.94 | 0.96 | 0.79 | 0.80 | 0.82 | 0.83 | 0.81 | 0.83 | 0.87 | 0.89 | 39.47  | 7.36 |
| Q99M80 | Isoform 4 of Receptor-type tyrosine-protein phosphatase T OS=Mus musculus GN=Ptpn11 PE=1 SV=1 - [PTPRT_MOUSE] | 8.78  | 6 | 9  | 9  | 20  | 0.99 | 1.05 | 1.02 | 0.91 | 0.93 | 0.83 | 0.84 | 0.82 | 0.85 | 0.85 | 0.86 | 0.86 | 0.89 | 161.07 | 6.84 |
| P08249 | Malate dehydrogenase, mitochondrial OS=Mus musculus GN=Mdh2 PE=1 SV=3 - [MDHM_MOUSE]                          | 69.53 | 1 | 26 | 26 | 537 | 0.85 | 0.93 | 1.07 | 0.96 | 1.13 | 0.87 | 1.02 | 0.82 | 0.95 | 0.82 | 0.97 | 0.85 | 0.99 | 35.59  | 8.68 |
| Q8BTZ4 | Isoform 2 of Anaphase-promoting complex subunit 5 OS=Mus musculus GN=Anapc5 PE=1 SV=1 - [APC5_MOUSE]          | 3.44  | 2 | 2  | 2  | 3   | 0.78 | 1.13 | 1.46 | 0.96 | 1.24 | 0.84 | 1.08 | 0.82 | 1.05 | 1.10 | 1.42 | 0.96 | 1.25 | 81.64  | 6.71 |
| Q8K2Q7 | BRO1 domain-containing protein BROX OS=Mus musculus GN=Brox PE=2 SV=1 - [BROX_MOUSE]                          | 3.89  | 1 | 2  | 2  | 8   | 1.25 | 1.07 | 0.85 | 1.27 | 1.01 | 1.02 | 0.81 | 0.82 | 0.65 | 1.01 | 0.80 | 1.17 | 0.93 | 46.17  | 7.69 |
| Q91ZP9 | N-terminal EF-hand calcium-binding protein 2 OS=Mus musculus GN=Necab2 PE=1 SV=1 - [NECA2_MOUSE]              | 39.07 | 3 | 13 | 13 | 24  | 1.15 | 1.20 | 0.95 | 1.03 | 0.91 | 0.85 | 0.71 | 0.82 | 0.68 | 0.91 | 0.79 | 1.13 | 1.00 | 43.41  | 5.30 |
| Q5THS6 | S-adenosylmethionine synthase isoform type-2 OS=Mus musculus GN=Mat2a PE=2 SV=2 - [METK2_MOUSE]               | 26.84 | 1 | 9  | 9  | 31  | 1.01 | 0.99 | 0.91 | 0.99 | 0.96 | 0.91 | 0.88 | 0.82 | 0.77 | 0.87 | 0.82 | 0.88 | 0.84 | 43.66  | 6.48 |
| E9Q1F5 | Protein Myo5c OS=Mus musculus GN=Myo5c PE=2 SV=1 - [E9Q1F5_MOUSE]                                             | 5.05  | 2 | 1  | 6  | 21  | 0.90 | 1.00 | 1.11 | 1.09 | 1.21 | 0.82 | 0.91 | 0.82 | 0.91 | 0.97 | 1.07 | 1.09 | 1.21 | 202.57 | 7.59 |

|          |                                                                                                          |       |   |    |    |     |      |      |      |      |      |      |      |      |      |      |      |      |      |        |      |
|----------|----------------------------------------------------------------------------------------------------------|-------|---|----|----|-----|------|------|------|------|------|------|------|------|------|------|------|------|------|--------|------|
| E9Q2V1   | Carbonic anhydrase-related protein 10<br>OS=Mus musculus<br>GN=Car10 PE=2<br>SV=1 -<br>[E9Q2V1_MOUSE]    | 22.70 | 4 | 4  | 4  | 11  | 0.83 | 1.06 | 1.18 | 0.95 | 1.18 | 0.71 | 0.87 | 0.82 | 1.05 | 0.73 | 0.98 | 0.78 | 0.89 | 34.93  | 8.09 |
| Q9CZS1   | Aldehyde dehydrogenase X, mitochondrial<br>OS=Mus musculus<br>GN=Aldh1b1 PE=2<br>SV=1 -<br>[AL1B1_MOUSE] | 43.35 | 4 | 14 | 16 | 32  | 0.98 | 0.89 | 0.83 | 1.04 | 0.96 | 0.89 | 0.91 | 0.82 | 0.84 | 0.95 | 0.95 | 1.01 | 1.01 | 57.52  | 7.02 |
| Q91WU5   | Arsenite methyltransferase<br>OS=Mus musculus<br>GN=As3mt PE=2<br>SV=2 -<br>[AS3MT_MOUSE]                | 10.90 | 1 | 3  | 3  | 7   | 1.02 | 1.00 | 0.98 | 0.89 | 0.86 | 0.87 | 0.86 | 0.82 | 0.77 | 0.92 | 0.88 | 0.94 | 0.89 | 41.77  | 5.86 |
| D6RG44   | Transmembrane protein 126A<br>OS=Mus musculus<br>GN=Tmem126a PE=4<br>SV=1 -<br>[D6RG44_MOUSE]            | 35.96 | 1 | 1  | 2  | 3   | 0.87 | 0.79 | 0.90 | 0.96 | 1.10 | 1.06 | 1.20 | 0.82 | 0.93 | 0.67 | 0.76 | 0.86 | 0.98 | 9.78   | 9.60 |
| E9PWK1   | Epoxide hydrolase 1<br>OS=Mus musculus<br>GN=Ephx1 PE=2<br>SV=1 -<br>[E9PWK1_MOUSE]                      | 9.30  | 3 | 4  | 4  | 17  | 0.93 | 1.17 | 1.28 | 1.11 | 1.18 | 0.81 | 0.86 | 0.82 | 0.86 | 0.92 | 0.98 | 0.96 | 1.04 | 50.94  | 8.15 |
| B9EJ80   | PDZ domain containing 8<br>OS=Mus musculus<br>GN=Pdzd8 PE=2<br>SV=1 -<br>[B9EJ80_MOUSE]                  | 5.49  | 1 | 5  | 5  | 12  | 0.91 | 0.98 | 1.15 | 1.09 | 1.17 | 0.97 | 1.12 | 0.82 | 0.98 | 0.95 | 1.07 | 0.83 | 1.05 | 127.66 | 6.04 |
| H3BJD6   | Protein Ppp1r9a<br>OS=Mus musculus<br>GN=Ppp1r9a PE=2<br>SV=1 -<br>[H3BJD6_MOUSE]                        | 40.63 | 7 | 1  | 40 | 216 | 1.05 | 0.99 | 0.94 | 1.01 | 0.96 | 1.01 | 0.95 | 0.82 | 0.78 | 1.24 | 1.18 | 1.09 | 1.04 | 144.31 | 5.55 |
| P70662-2 | Isoform 2 of LIM domain-binding protein 1<br>OS=Mus musculus<br>GN=Ldb1 -<br>[LDB1_MOUSE]                | 3.13  | 4 | 1  | 1  | 1   | 0.96 | 1.07 | 1.12 | 1.01 | 1.06 | 0.84 | 0.87 | 0.82 | 0.85 | 0.88 | 0.92 | 0.98 | 1.03 | 36.64  | 8.63 |
| Q9QXG4   | Acetyl-coenzyme A synthetase, cytoplasmic<br>OS=Mus musculus<br>GN=Acs2 PE=1<br>SV=2 -<br>[ACSA_MOUSE]   | 4.42  | 4 | 2  | 2  | 3   | 1.01 | 1.19 | 1.18 | 1.11 | 1.10 | 0.85 | 0.84 | 0.82 | 0.81 | 0.82 | 0.81 | 0.80 | 0.79 | 78.81  | 6.64 |
| P51150   | Ras-related protein Rab 7a<br>OS=Mus musculus<br>GN=Rab7a PE=1<br>SV=2 -<br>[RAB7A_MOUSE]                | 72.46 | 1 | 16 | 16 | 74  | 0.98 | 0.99 | 0.97 | 1.03 | 1.08 | 0.81 | 0.80 | 0.82 | 0.82 | 0.83 | 0.83 | 0.84 | 0.83 | 23.47  | 6.70 |
| Q8C7R4   | Ubiquitin-like modifier-activating enzyme 6<br>OS=Mus musculus<br>GN=Uba6 PE=1<br>SV=1 -<br>[UBA6_MOUSE] | 15.00 | 2 | 12 | 12 | 20  | 1.05 | 1.01 | 0.92 | 1.06 | 1.06 | 0.86 | 0.87 | 0.82 | 0.85 | 0.94 | 0.93 | 0.91 | 0.88 | 117.89 | 6.11 |

|        |                                                                                                                                         |       |   |    |    |     |      |      |      |      |      |      |      |      |      |      |      |      |      |        |       |
|--------|-----------------------------------------------------------------------------------------------------------------------------------------|-------|---|----|----|-----|------|------|------|------|------|------|------|------|------|------|------|------|------|--------|-------|
| Q3TCN2 | Isoform 2 of Putative phospholipase B-like 2<br>OS=Mus musculus<br>GN=Pibd2 - [PLBL2_MOUSE]                                             | 5.99  | 2 | 2  | 2  | 3   | 1.14 | 0.77 | 0.67 | 0.88 | 0.77 | 0.86 | 0.74 | 0.82 | 0.71 | 0.76 | 0.66 | 0.87 | 0.76 | 49.90  | 5.91  |
| Q61542 | StAR-related lipid transfer protein 3<br>OS=Mus musculus<br>GN=Stard3 PE=1<br>SV=1 - [STAR3_MOUSE]                                      | 4.71  | 1 | 2  | 2  | 4   | 1.13 | 1.16 | 1.03 | 1.08 | 0.95 | 0.91 | 0.80 | 0.82 | 0.72 | 0.90 | 0.80 | 0.96 | 0.85 | 50.44  | 7.49  |
| P21981 | Protein-glutamine gamma-glutamyltransferase 2<br>OS=Mus musculus<br>GN=Tgm2 PE=1 SV=4 - [TGM2_MOUSE]                                    | 2.33  | 1 | 1  | 1  | 2   | 0.89 | 0.84 | 0.94 | 0.82 | 0.91 | 0.78 | 0.87 | 0.82 | 0.92 | 0.88 | 0.99 | 0.74 | 0.83 | 77.01  | 5.10  |
| Q505D1 | Serine/threonine-protein phosphatase 6 regulatory ankyrin repeat subunit A<br>OS=Mus musculus<br>GN=Ankr28 PE=1<br>SV=1 - [ANR28_MOUSE] | 4.08  | 3 | 3  | 3  | 6   | 1.03 | 1.21 | 1.13 | 1.24 | 1.11 | 0.97 | 0.94 | 0.82 | 0.80 | 0.90 | 0.87 | 1.09 | 1.10 | 112.83 | 6.27  |
| P62259 | 14-3-3 protein epsilon<br>OS=Mus musculus<br>GN=Ywhae PE=1<br>SV=1 - [1433E_MOUSE]                                                      | 86.27 | 4 | 22 | 25 | 720 | 0.96 | 1.01 | 1.06 | 1.00 | 1.06 | 0.84 | 0.89 | 0.82 | 0.87 | 0.83 | 0.88 | 0.87 | 0.91 | 29.16  | 4.74  |
| P27048 | Small nuclear ribonucleoprotein-associated protein B<br>OS=Mus musculus<br>GN=Snrpb PE=1<br>SV=1 - [RSMB_MOUSE]                         | 14.72 | 2 | 3  | 3  | 8   | 0.86 | 0.86 | 1.05 | 0.91 | 1.15 | 0.90 | 1.08 | 0.82 | 1.02 | 0.95 | 1.18 | 0.88 | 1.05 | 23.64  | 10.90 |
| Q922Q4 | Pyroline-5-carboxylate reductase 2<br>OS=Mus musculus<br>GN=Pycr2 PE=2 SV=1 - [P5CR2_MOUSE]                                             | 7.81  | 1 | 2  | 2  | 5   | 0.79 | 0.82 | 0.90 | 0.92 | 1.17 | 0.80 | 1.01 | 0.82 | 1.01 | 0.90 | 1.06 | 0.70 | 0.85 | 33.64  | 7.77  |
| Q5RKR3 | Immunoglobulin superfamily containing leucine-rich repeat protein 2<br>OS=Mus musculus<br>GN=Islr2 PE=1 SV=1 - [ISLR2_MOUSE]            | 6.17  | 2 | 4  | 4  | 7   | 0.96 | 1.10 | 1.11 | 0.95 | 1.04 | 0.88 | 0.82 | 0.82 | 0.76 | 0.90 | 0.85 | 0.93 | 0.93 | 79.71  | 5.49  |
| Q80Y17 | Lethal(2) giant larvae protein homolog 1<br>OS=Mus musculus<br>GN=Ljgl1 PE=1 SV=1 - [L2GL1_MOUSE]                                       | 13.71 | 1 | 9  | 9  | 15  | 0.91 | 1.01 | 1.09 | 0.97 | 1.13 | 0.86 | 0.96 | 0.82 | 0.92 | 0.97 | 0.93 | 1.01 | 1.24 | 112.55 | 6.48  |
| Q8CGK3 | Lon protease homolog, mitochondrial<br>OS=Mus musculus<br>GN=Lomp1 PE=1 SV=2 - [LONM_MOUSE]                                             | 21.92 | 1 | 14 | 14 | 29  | 1.08 | 0.99 | 0.94 | 1.15 | 1.10 | 0.92 | 0.85 | 0.82 | 0.87 | 0.86 | 0.83 | 0.90 | 0.86 | 105.78 | 6.57  |
| D6RCG2 | Dolichyl-phosphate beta-glucosyltransferase<br>OS=Mus musculus<br>GN=Alg5 PE=4 SV=1 - [D6RCG2_MOUSE]                                    | 14.29 | 2 | 1  | 1  | 2   | 0.87 | 0.75 | 0.86 | 1.06 | 1.21 | 0.88 | 1.01 | 0.82 | 0.94 | 0.92 | 1.05 | 0.88 | 1.01 | 9.10   | 5.29  |

|          |                                                                                                                                                                |       |   |    |    |    |      |      |      |      |      |      |      |      |      |      |      |      |      |        |      |
|----------|----------------------------------------------------------------------------------------------------------------------------------------------------------------|-------|---|----|----|----|------|------|------|------|------|------|------|------|------|------|------|------|------|--------|------|
| G5E870   | E3 ubiquitin-protein ligase TRIP12<br>OS=Mus musculus<br>GN=Trip12 PE=1<br>SV=1 -<br>[TRIPC_MOUSE]                                                             | 0.59  | 1 | 1  | 1  | 5  | 1.08 | 1.16 | 1.07 | 1.15 | 1.06 | 0.96 | 0.88 | 0.82 | 0.76 | 0.96 | 0.89 | 1.21 | 1.12 | 223.99 | 8.35 |
| Q8CDN6   | Thioredoxin-like protein 1 OS=Mus musculus<br>GN=Txnl1 PE=1 SV=3 -<br>[TXNL1_MOUSE]                                                                            | 58.48 | 1 | 14 | 14 | 42 | 0.94 | 0.83 | 0.88 | 0.87 | 0.90 | 0.77 | 0.77 | 0.82 | 0.84 | 0.75 | 0.79 | 0.84 | 0.87 | 32.22  | 4.96 |
| O08586   | Phosphatidylinositol 3,4,5-trisphosphate 3-phosphatase and dual-specificity protein phosphatase PTEN<br>OS=Mus musculus<br>GN=Pten PE=1 SV=1 -<br>[PTEN_MOUSE] | 14.14 | 1 | 4  | 4  | 9  | 0.99 | 0.87 | 0.83 | 1.04 | 1.18 | 0.71 | 0.95 | 0.82 | 0.81 | 1.00 | 1.10 | 0.80 | 0.98 | 47.12  | 6.37 |
| Q9J59-2  | Isoform 2 of ATP-binding cassette sub-family B member 9<br>OS=Mus musculus<br>GN=Abcb9 -<br>[ABCB9_MOUSE]                                                      | 5.35  | 3 | 2  | 3  | 5  | 0.88 | 1.02 | 1.15 | 1.14 | 1.29 | 0.87 | 0.98 | 0.82 | 0.93 | 0.85 | 0.97 | 0.82 | 0.94 | 70.17  | 7.94 |
| Q9DBH5   | Vesicular integral-membrane protein VIP36 OS=Mus musculus<br>GN=Lman2 PE=2 SV=2 -<br>[LMAN2_MOUSE]                                                             | 20.95 | 1 | 6  | 6  | 11 | 1.05 | 1.01 | 1.00 | 0.97 | 0.99 | 0.95 | 0.87 | 0.82 | 0.86 | 0.94 | 0.89 | 0.94 | 0.89 | 40.40  | 6.95 |
| Q5DQR4   | Isoform 2 of Syntaxin-binding protein 5-like<br>OS=Mus musculus<br>GN=Stxbp5l -<br>[STB5L_MOUSE]                                                               | 12.94 | 4 | 2  | 11 | 18 | 0.71 | 0.90 | 1.25 | 0.85 | 1.19 | 0.75 | 1.04 | 0.82 | 1.15 | 0.82 | 1.15 | 0.69 | 0.97 | 125.72 | 6.65 |
| F8WHY8   | Metastasis-associated protein MTA1<br>OS=Mus musculus<br>GN=Mta1 PE=2 SV=1 -<br>[F8WHY8_MOUSE]                                                                 | 3.87  | 3 | 3  | 3  | 4  | 1.07 | 0.83 | 0.89 | 1.13 | 1.11 | 0.95 | 1.03 | 0.82 | 0.98 | 0.90 | 0.96 | 1.15 | 1.07 | 79.14  | 9.42 |
| Q99KQ4   | Nicotinamide phosphoribosyltransferase OS=Mus musculus<br>GN=Nampt PE=1<br>SV=1 -<br>[NAMPT_MOUSE]                                                             | 23.42 | 1 | 10 | 10 | 20 | 1.00 | 0.99 | 1.05 | 1.04 | 1.09 | 0.94 | 0.81 | 0.82 | 0.87 | 0.85 | 0.87 | 0.93 | 0.90 | 55.41  | 7.15 |
| O55100-2 | Isoform 1B of Synaptogyrin-1<br>OS=Mus musculus<br>GN=Syng1 -<br>[SNG1_MOUSE]                                                                                  | 12.57 | 2 | 2  | 2  | 23 | 1.13 | 1.11 | 1.05 | 1.19 | 1.06 | 0.86 | 0.75 | 0.82 | 0.72 | 0.90 | 0.81 | 0.99 | 0.86 | 21.28  | 5.26 |
| B2RWJ3   | EG381582 protein OS=Mus musculus<br>GN=Tmem240 PE=2<br>SV=1 -<br>[B2RWJ3_MOUSE]                                                                                | 4.62  | 1 | 1  | 1  | 1  | 0.84 | 1.28 | 1.53 | 1.32 | 1.58 | 0.83 | 0.99 | 0.82 | 0.98 | 0.92 | 1.10 | 0.86 | 1.03 | 19.99  | 7.80 |
| Q8R3R8   | Gamma-aminobutyric acid receptor-associated protein-like 1 OS=Mus musculus<br>GN=Gabarap1l PE=1<br>SV=2 -<br>[GBRL1_MOUSE]                                     | 35.04 | 1 | 2  | 5  | 27 | 0.61 | 0.82 | 1.23 | 0.89 | 1.29 | 0.71 | 1.11 | 0.82 | 1.35 | 0.79 | 1.17 | 0.64 | 0.94 | 14.04  | 8.73 |

|          |                                                                                                          |       |    |    |    |    |      |      |      |      |      |      |      |      |      |      |      |      |      |        |      |
|----------|----------------------------------------------------------------------------------------------------------|-------|----|----|----|----|------|------|------|------|------|------|------|------|------|------|------|------|------|--------|------|
| Q921G8   | Gamma-tubulin complex component 2 OS=Mus musculus GN=Tubgcp2 PE=2 SV=2 - [GCP2_MOUSE]                    | 3.65  | 1  | 2  | 2  | 3  | 0.81 | 1.31 | 1.61 | 1.18 | 1.45 | 0.86 | 1.06 | 0.82 | 1.01 | 0.85 | 1.05 | 0.88 | 1.09 | 103.16 | 6.77 |
| P61294   | Ras-related protein Rab6B OS=Mus musculus GN=Rab6b PE=1 SV=1 - [RAB6B_MOUSE]                             | 52.40 | 10 | 6  | 10 | 79 | 1.08 | 1.05 | 0.99 | 0.97 | 0.97 | 0.79 | 0.78 | 0.82 | 0.75 | 0.85 | 0.79 | 0.94 | 0.96 | 23.45  | 5.53 |
| P51660   | Peroxisomal multifunctional enzyme type 2 OS=Mus musculus GN=Hsd17b4 PE=1 SV=3 - [DHB4_MOUSE]            | 19.05 | 1  | 10 | 10 | 24 | 0.94 | 1.09 | 1.14 | 0.99 | 1.02 | 0.84 | 0.83 | 0.82 | 0.89 | 0.88 | 0.89 | 0.96 | 0.98 | 79.43  | 8.57 |
| Q6ZQ29-2 | Isoform 2 of Serine/threonine-protein kinase TAO2 OS=Mus musculus GN=Taok2 - [TAOK2_MOUSE]               | 10.33 | 2  | 5  | 6  | 11 | 0.72 | 0.97 | 1.43 | 0.82 | 1.20 | 0.92 | 1.38 | 0.82 | 1.31 | 0.96 | 1.33 | 1.01 | 1.41 | 119.88 | 7.28 |
| A6H5Y3   | Methionine synthase OS=Mus musculus GN=Mtr PE=2 SV=1 - [METH_MOUSE]                                      | 0.80  | 1  | 1  | 1  | 2  | 0.91 | 1.25 | 1.37 | 1.16 | 1.28 | 0.77 | 0.84 | 0.82 | 0.90 | 1.03 | 1.13 | 1.18 | 1.30 | 138.98 | 5.57 |
| Q91VK4   | Integral membrane protein 2C OS=Mus musculus GN=Itm2c PE=1 SV=2 - [ITM2C_MOUSE]                          | 27.88 | 1  | 5  | 5  | 8  | 1.21 | 1.00 | 0.77 | 1.11 | 1.00 | 0.97 | 0.80 | 0.82 | 0.68 | 1.00 | 0.79 | 0.93 | 0.80 | 30.46  | 8.59 |
| Q8C031   | Leucine-rich repeat-containing protein 4C OS=Mus musculus GN=Lrrc4c PE=1 SV=2 - [LRC4C_MOUSE]            | 5.16  | 1  | 3  | 3  | 7  | 1.00 | 1.27 | 1.24 | 1.11 | 1.20 | 0.91 | 0.91 | 0.82 | 0.89 | 0.91 | 0.91 | 0.88 | 0.93 | 71.95  | 7.15 |
| Q9D4C9   | Clavesin-1 OS=Mus musculus GN=Civs1 PE=2 SV=1 - [CLVS1_MOUSE]                                            | 14.12 | 3  | 2  | 4  | 7  | 0.88 | 0.84 | 0.96 | 0.90 | 1.02 | 0.92 | 1.04 | 0.82 | 0.93 | 0.90 | 1.03 | 0.82 | 0.93 | 40.59  | 6.73 |
| A2AGS6   | Tumor protein p53-inducible protein 11 (Fragment) OS=Mus musculus GN=Trp53i11 PE=2 SV=1 - [A2AGS6_MOUSE] | 29.89 | 2  | 3  | 3  | 12 | 1.04 | 1.00 | 1.00 | 0.90 | 0.96 | 0.81 | 0.80 | 0.82 | 0.80 | 0.79 | 0.78 | 0.86 | 0.83 | 9.59   | 9.60 |
| Q3TBW2   | 39S ribosomal protein L10, mitochondrial OS=Mus musculus GN=Mrl10 PE=2 SV=2 - [RM10_MOUSE]               | 8.78  | 1  | 1  | 1  | 1  | 0.85 | 0.97 | 1.14 | 1.36 | 1.61 | 1.03 | 1.21 | 0.82 | 0.97 | 1.26 | 1.48 | 0.85 | 1.00 | 29.38  | 9.69 |
| Q9D6D0   | Protein Slc25a27 OS=Mus musculus GN=Slc25a27 PE=2 SV=1 - [Q9D6D0_MOUSE]                                  | 9.63  | 1  | 3  | 3  | 5  | 1.04 | 1.37 | 1.31 | 1.18 | 1.04 | 0.82 | 0.74 | 0.82 | 0.79 | 0.85 | 0.82 | 0.96 | 0.93 | 35.77  | 9.39 |
| Q8BG51   | Mitochondrial Rho GTPase 1 OS=Mus musculus GN=Rhot1 PE=2 SV=1 - [MIRO1_MOUSE]                            | 14.42 | 8  | 6  | 6  | 9  | 1.06 | 1.10 | 1.12 | 1.16 | 1.17 | 0.82 | 0.83 | 0.82 | 0.81 | 0.97 | 0.91 | 0.94 | 0.93 | 72.20  | 6.49 |

|          |                                                                                                            |       |    |    |    |    |      |      |      |      |      |      |      |      |      |      |      |      |      |       |       |
|----------|------------------------------------------------------------------------------------------------------------|-------|----|----|----|----|------|------|------|------|------|------|------|------|------|------|------|------|------|-------|-------|
| P98086   | Complement C1q subcomponent subunit A OS=Mus musculus GN=C1qa PE=1 SV=2 - [C1QA_MOUSE]                     | 21.63 | 1  | 3  | 3  | 3  | 1.07 | 0.74 | 0.68 | 1.00 | 0.88 | 0.86 | 0.80 | 0.82 | 0.87 | 0.82 | 0.77 | 0.84 | 0.79 | 25.96 | 9.11  |
| Q62095   | ATP-dependent RNA helicase DDX3Y OS=Mus musculus GN=Ddx3y PE=1 SV=2 - [DDX3Y_MOUSE]                        | 36.02 | 3  | 5  | 20 | 44 | 1.12 | 0.96 | 0.96 | 1.05 | 1.05 | 1.01 | 0.92 | 0.82 | 0.81 | 0.97 | 0.98 | 0.97 | 0.99 | 73.38 | 7.53  |
| P97494   | Glutamate--cysteine ligase catalytic subunit OS=Mus musculus GN=Gclc PE=2 SV=4 - [GSH1_MOUSE]              | 16.01 | 1  | 8  | 8  | 21 | 1.01 | 0.95 | 0.96 | 1.04 | 1.04 | 0.94 | 0.91 | 0.82 | 0.77 | 0.92 | 0.90 | 0.93 | 0.91 | 72.53 | 5.90  |
| Q62WN5   | 40S ribosomal protein S9 OS=Mus musculus GN=Rps9 PE=2 SV=3 - [RS9_MOUSE]                                   | 31.44 | 6  | 8  | 8  | 13 | 1.11 | 1.00 | 0.91 | 1.14 | 1.03 | 0.91 | 0.83 | 0.82 | 0.78 | 0.96 | 0.87 | 0.99 | 0.95 | 22.58 | 10.65 |
| Q9DBG7   | Signal recognition particle receptor subunit alpha OS=Mus musculus GN=Spr PE=1 SV=1 - [SRPR_MOUSE]         | 2.20  | 1  | 1  | 1  | 1  | 0.85 | 0.93 | 1.10 | 1.07 | 1.26 | 0.92 | 1.09 | 0.82 | 0.97 | 0.95 | 1.12 | 0.92 | 1.09 | 69.58 | 8.95  |
| Q62443   | Neuronal pentraxin-1 OS=Mus musculus GN=Nptx1 PE=2 SV=1 - [NPTX1_MOUSE]                                    | 32.41 | 1  | 12 | 13 | 21 | 0.92 | 0.88 | 1.04 | 0.94 | 1.02 | 0.92 | 1.06 | 0.82 | 1.08 | 0.75 | 1.05 | 0.75 | 0.91 | 47.09 | 6.44  |
| A2AFS3-2 | Isoform 3 of UPF0577 protein KIAA1324 OS=Mus musculus GN=Kiaa1324 - [K1324_MOUSE]                          | 1.64  | 3  | 1  | 1  | 2  | 0.95 | 1.07 | 1.12 | 1.19 | 1.25 | 0.92 | 0.96 | 0.83 | 0.86 | 0.95 | 1.00 | 0.98 | 1.03 | 86.66 | 7.40  |
| E0CX81   | Glucose 1,6-bisphosphate synthase OS=Mus musculus GN=Pgm211 PE=2 SV=1 - [E0CX81_MOUSE]                     | 43.08 | 1  | 1  | 10 | 26 | 0.96 | 1.27 | 1.32 | 1.04 | 1.07 | 0.98 | 1.01 | 0.83 | 0.85 | 1.30 | 1.35 | 0.94 | 0.98 | 28.86 | 7.15  |
| P97950   | Ras-related protein Rab33A OS=Mus musculus GN=Rab33a PE=2 SV=1 - [RB33A_MOUSE]                             | 16.03 | 1  | 3  | 3  | 4  | 0.85 | 1.01 | 1.04 | 0.94 | 1.11 | 0.93 | 1.08 | 0.83 | 0.97 | 0.78 | 0.92 | 0.94 | 0.85 | 26.52 | 7.88  |
| Q5ICG5   | Long chain acyl-CoA synthetase 6 isoform 3 OS=Mus musculus GN=Acs16 PE=2 SV=1 - [Q5ICG5_MOUSE]             | 40.32 | 11 | 25 | 25 | 60 | 0.93 | 0.99 | 1.07 | 1.09 | 1.21 | 0.81 | 0.90 | 0.83 | 0.91 | 0.85 | 0.92 | 0.84 | 0.94 | 77.92 | 7.24  |
| Q80X14   | Phosphatidylinositol 5-phosphate 4-kinase type-2 beta OS=Mus musculus GN=Pip4k2b PE=1 SV=1 - [PI42B_MOUSE] | 27.64 | 1  | 6  | 9  | 58 | 1.03 | 1.07 | 1.09 | 1.04 | 1.03 | 0.85 | 0.80 | 0.83 | 0.83 | 0.83 | 0.86 | 0.85 | 0.83 | 47.29 | 7.33  |

|          |                                                                                                                     |       |    |    |    |     |      |      |      |      |      |      |      |      |      |      |      |      |      |        |      |
|----------|---------------------------------------------------------------------------------------------------------------------|-------|----|----|----|-----|------|------|------|------|------|------|------|------|------|------|------|------|------|--------|------|
| O08532-5 | Isoform 2E of Voltage-dependent calcium channel subunit alpha-2/delta-1 OS=Mus musculus GN=Cacna2d1 - [CA2D1_MOUSE] | 42.07 | 3  | 2  | 34 | 153 | 0.86 | 0.83 | 0.88 | 0.90 | 1.00 | 0.98 | 1.03 | 0.83 | 1.08 | 0.94 | 1.14 | 0.93 | 1.03 | 123.18 | 5.27 |
| Q9R0N5   | Synaptotagmin-5 OS=Mus musculus GN=Syt5 PE=1 SV=1 - [SYT5_MOUSE]                                                    | 13.47 | 1  | 3  | 6  | 35  | 1.15 | 1.06 | 0.92 | 1.05 | 0.99 | 0.83 | 0.73 | 0.83 | 0.77 | 1.01 | 0.88 | 0.91 | 0.86 | 43.10  | 9.60 |
| Q9D3Z8   | Transmembrane protein 35 OS=Mus musculus GN=Tmem35 PE=2 SV=1 - [TMM35_MOUSE]                                        | 18.56 | 2  | 4  | 4  | 7   | 1.24 | 1.12 | 0.99 | 1.20 | 1.00 | 0.94 | 0.80 | 0.83 | 0.62 | 1.03 | 0.88 | 1.16 | 0.99 | 18.49  | 9.99 |
| G3UX05   | Protein Gstt3 OS=Mus musculus GN=Gstt3 PE=2 SV=1 - [G3UX05_MOUSE]                                                   | 14.00 | 4  | 2  | 2  | 3   | 0.96 | 1.34 | 1.39 | 0.97 | 1.01 | 0.83 | 0.85 | 0.83 | 0.85 | 0.97 | 1.00 | 1.01 | 1.05 | 22.67  | 7.37 |
| Q922Q1   | MOSC domain-containing protein 2, mitochondrial OS=Mus musculus GN=Marc2 PE=1 SV=1 - [MOSC2_MOUSE]                  | 25.15 | 6  | 7  | 7  | 12  | 0.94 | 0.70 | 0.84 | 0.82 | 0.91 | 0.76 | 0.82 | 0.83 | 0.80 | 0.67 | 0.70 | 0.68 | 0.71 | 38.17  | 8.68 |
| P35283   | Ras-related protein Rab12 OS=Mus musculus GN=Rab12 PE=1 SV=3 - [RAB12_MOUSE]                                        | 44.44 | 11 | 9  | 10 | 73  | 1.09 | 0.95 | 1.21 | 1.07 | 1.00 | 0.91 | 0.87 | 0.83 | 0.94 | 0.88 | 1.03 | 0.91 | 0.96 | 27.31  | 8.41 |
| B1AT36   | 26S proteasome non-ATPase regulatory subunit 12 OS=Mus musculus GN=Psm12 PE=2 SV=1 - [B1AT36_MOUSE]                 | 31.19 | 3  | 11 | 11 | 26  | 1.00 | 1.05 | 0.95 | 1.11 | 1.04 | 0.92 | 0.94 | 0.83 | 0.81 | 0.97 | 0.94 | 1.01 | 0.99 | 50.54  | 7.36 |
| Q8C1A5   | Thimet oligopeptidase OS=Mus musculus GN=Thop1 PE=1 SV=1 - [THOP1_MOUSE]                                            | 31.00 | 1  | 16 | 16 | 43  | 0.94 | 1.00 | 1.07 | 1.00 | 1.10 | 0.82 | 0.87 | 0.83 | 0.84 | 0.86 | 0.90 | 0.92 | 0.99 | 77.98  | 6.06 |
| P11276   | Fibronectin OS=Mus musculus GN=Fn1 PE=1 SV=4 - [FNC_MOUSE]                                                          | 9.25  | 1  | 16 | 16 | 39  | 1.01 | 1.00 | 1.00 | 0.88 | 0.86 | 0.75 | 0.77 | 0.83 | 0.82 | 0.81 | 0.81 | 0.73 | 0.70 | 272.37 | 5.59 |
| P62331   | ADP-ribosylation factor 6 OS=Mus musculus GN=Arf6 PE=1 SV=2 - [ARF6_MOUSE]                                          | 32.57 | 4  | 4  | 4  | 12  | 0.99 | 0.83 | 0.79 | 0.99 | 0.96 | 0.88 | 0.89 | 0.83 | 0.79 | 0.87 | 0.86 | 0.87 | 0.82 | 20.07  | 8.95 |
| A2A701   | Eukaryotic translation initiation factor 3 subunit M (Fragment) OS=Mus musculus GN=Eif3m PE=4 SV=1 - [A2A701_MOUSE] | 12.59 | 3  | 1  | 1  | 2   | 1.04 | 1.11 | 1.06 | 0.98 | 0.93 | 0.91 | 0.87 | 0.83 | 0.79 | 0.90 | 0.87 | 1.04 | 1.00 | 16.51  | 9.19 |
| Q921C1   | Gap junction gamma-3 protein OS=Mus musculus GN=Gjc3 PE=2 SV=2 - [CXG3_MOUSE]                                       | 4.46  | 1  | 1  | 1  | 2   | 1.16 | 1.03 | 0.89 | 1.06 | 0.91 | 0.78 | 0.67 | 0.83 | 0.71 | 0.79 | 0.68 | 0.88 | 0.76 | 30.27  | 8.37 |

|          |                                                                                                                     |       |    |    |    |    |      |      |      |      |      |      |      |      |      |      |      |      |      |        |      |
|----------|---------------------------------------------------------------------------------------------------------------------|-------|----|----|----|----|------|------|------|------|------|------|------|------|------|------|------|------|------|--------|------|
| P49446-3 | Isoform 3 of Receptor-type tyrosine-protein phosphatase epsilon OS=Mus musculus GN=Ppre - [PTPRE_MOUSE]             | 8.46  | 3  | 3  | 4  | 9  | 1.10 | 1.34 | 1.34 | 0.98 | 1.03 | 0.91 | 0.87 | 0.83 | 0.79 | 0.94 | 0.92 | 1.09 | 1.13 | 71.42  | 6.83 |
| Q7TNF9-  | Isoform 2 of Protein FAM117A OS=Mus musculus GN=Fam117a - [F117A_MOUSE]                                             | 2.20  | 2  | 1  | 1  | 2  | 0.94 | 0.91 | 0.96 | 0.90 | 0.95 | 1.16 | 1.22 | 0.83 | 0.87 | 1.17 | 1.24 | 1.30 | 1.38 | 43.73  | 8.32 |
| Q55VE1   | Disintegrin and metalloproteinase domain-containing protein 23 OS=Mus musculus GN=Adam23 PE=2 SV=1 - [Q55VE1_MOUSE] | 28.84 | 7  | 12 | 12 | 23 | 1.00 | 0.94 | 1.05 | 1.07 | 1.02 | 0.95 | 0.94 | 0.83 | 0.81 | 0.91 | 0.92 | 0.96 | 1.02 | 71.63  | 7.40 |
| F6V8A7   | Protein RMD5 homolog A (Fragment) OS=Mus musculus GN=Rmd5a PE=4 SV=1 - [F6V8A7_MOUSE]                               | 4.13  | 2  | 1  | 1  | 1  | 0.86 | 1.09 | 1.26 | 1.06 | 1.23 | 0.82 | 0.95 | 0.83 | 0.96 | 0.80 | 0.94 | 1.04 | 1.21 | 24.58  | 7.61 |
| B1AY13   | Ubiquitin carboxyl-terminal hydrolase 24 OS=Mus musculus GN=Usp24 PE=1 SV=1 - [UBP24_MOUSE]                         | 0.88  | 3  | 1  | 2  | 3  | 0.86 | 1.37 | 1.58 | 1.03 | 1.19 | 0.90 | 1.03 | 0.83 | 0.95 | 1.11 | 1.29 | 1.24 | 1.44 | 293.81 | 6.19 |
| P47199   | Quinone oxidoreductase OS=Mus musculus GN=Cryz PE=2 SV=1 - [QOR_MOUSE]                                              | 43.20 | 5  | 8  | 9  | 23 | 1.05 | 0.83 | 0.77 | 1.08 | 0.97 | 0.96 | 0.89 | 0.83 | 0.78 | 0.97 | 0.92 | 1.08 | 1.07 | 35.25  | 8.07 |
| P14824   | Annexin A6 OS=Mus musculus GN=Anxa6 PE=1 SV=3 - [ANXA6_MOUSE]                                                       | 50.97 | 2  | 29 | 30 | 69 | 0.95 | 0.95 | 1.02 | 0.99 | 1.05 | 0.90 | 0.90 | 0.83 | 0.86 | 0.88 | 0.94 | 0.95 | 0.96 | 75.84  | 5.50 |
| Q8VBZ3   | Cleft lip and palate transmembrane protein 1 homolog OS=Mus musculus GN=Clptm1 PE=1 SV=1 - [CLPT1_MOUSE]            | 6.17  | 1  | 3  | 3  | 4  | 1.00 | 0.93 | 1.02 | 1.02 | 1.02 | 0.83 | 0.90 | 0.83 | 0.82 | 0.93 | 1.04 | 1.10 | 1.15 | 75.24  | 6.30 |
| P55258   | Ras-related protein Rab8A OS=Mus musculus GN=Rab8a PE=1 SV=2 - [RAB8A_MOUSE]                                        | 29.47 | 11 | 1  | 7  | 61 | 0.88 | 1.04 | 1.18 | 0.86 | 0.97 | 0.60 | 0.68 | 0.83 | 0.93 | 1.09 | 1.24 | 0.88 | 1.00 | 23.65  | 9.07 |
| Q8VBT0   | Thioredoxin-related transmembrane protein 1 OS=Mus musculus GN=Tmx1 PE=1 SV=1 - [TMX1_MOUSE]                        | 14.03 | 2  | 4  | 4  | 6  | 1.14 | 0.87 | 0.69 | 1.15 | 1.00 | 0.98 | 0.83 | 0.83 | 0.75 | 1.00 | 0.85 | 1.12 | 0.89 | 31.38  | 5.29 |
| Q61423   | Potassium voltage-gated channel subfamily A member 4 OS=Mus musculus GN=Kcna4 PE=1 SV=2 - [KCNA4_MOUSE]             | 11.16 | 1  | 5  | 6  | 21 | 1.05 | 0.96 | 0.91 | 1.06 | 0.98 | 0.88 | 0.83 | 0.83 | 0.77 | 0.86 | 0.80 | 1.00 | 0.94 | 73.42  | 5.29 |



|          |                                                                                                                |       |    |    |    |     |      |      |      |      |      |      |      |      |      |      |      |      |      |        |      |
|----------|----------------------------------------------------------------------------------------------------------------|-------|----|----|----|-----|------|------|------|------|------|------|------|------|------|------|------|------|------|--------|------|
| Q9CZX0   | Elongator complex protein 3 OS=Mus musculus GN=Elp3 PE=2 SV=1 - [ELP3_MOUSE]                                   | 8.78  | 2  | 4  | 4  | 6   | 1.02 | 1.18 | 1.17 | 1.16 | 1.13 | 0.92 | 0.90 | 0.83 | 0.79 | 1.01 | 1.03 | 1.08 | 1.01 | 62.35  | 8.90 |
| E9Q8I9   | Protein furry homolog OS=Mus musculus GN=Fry PE=1 SV=1 - [FRY_MOUSE]                                           | 2.19  | 2  | 3  | 4  | 8   | 0.78 | 1.11 | 1.43 | 1.21 | 1.45 | 0.88 | 1.11 | 0.83 | 1.19 | 0.97 | 1.17 | 1.05 | 1.43 | 338.88 | 6.01 |
| P52480-2 | Isoform M1 of Pyruvate kinase PKM OS=Mus musculus GN=Pkm - [KPYM_MOUSE]                                        | 79.66 | 4  | 4  | 46 | 878 | 0.86 | 1.09 | 1.29 | 1.03 | 1.20 | 0.86 | 0.98 | 0.83 | 0.94 | 0.84 | 0.95 | 0.89 | 1.06 | 57.95  | 7.14 |
| Q80UW8   | DNA-directed RNA polymerases I, II, and III subunit RPABC1 OS=Mus musculus GN=Polr2e PE=2 SV=1 - [RPAB1_MOUSE] | 16.67 | 1  | 3  | 3  | 6   | 0.96 | 0.81 | 0.85 | 0.87 | 0.89 | 0.75 | 0.74 | 0.83 | 0.89 | 0.67 | 0.72 | 0.68 | 0.77 | 24.55  | 5.95 |
| P61750   | ADP-ribosylation factor 4 OS=Mus musculus GN=Arf4 PE=2 SV=2 - [ARF4_MOUSE]                                     | 60.56 | 5  | 3  | 8  | 42  | 1.08 | 0.87 | 0.82 | 1.09 | 1.01 | 0.88 | 0.81 | 0.83 | 0.77 | 0.90 | 0.87 | 0.96 | 0.92 | 20.38  | 7.14 |
| Q8R0Y6   | Cytosolic 10-formyltetrahydrofolate dehydrogenase OS=Mus musculus GN=Aldh1l1 PE=2 SV=1 - [AL1L1_MOUSE]         | 44.12 | 1  | 28 | 31 | 85  | 0.92 | 0.90 | 0.96 | 1.05 | 1.09 | 0.92 | 0.94 | 0.83 | 0.91 | 0.92 | 0.99 | 0.92 | 0.98 | 98.65  | 5.91 |
| D3Z1B2   | MCG50540 OS=Mus musculus GN=Gm4953 PE=4 SV=1 - [D3Z1B2_MOUSE]                                                  | 18.63 | 1  | 1  | 3  | 6   | 0.88 | 1.06 | 1.21 | 0.93 | 1.06 | 1.00 | 1.14 | 0.83 | 0.94 | 0.89 | 1.02 | 0.78 | 0.89 | 18.51  | 5.44 |
| A2ABY3   | Ethanolamine-phosphate cytidyltransferase OS=Mus musculus GN=Pcyt2 PE=4 SV=1 - [A2ABY3_MOUSE]                  | 21.50 | 2  | 7  | 7  | 22  | 1.06 | 0.93 | 0.99 | 0.94 | 0.95 | 0.78 | 0.80 | 0.83 | 0.89 | 0.81 | 0.87 | 0.95 | 0.88 | 43.42  | 6.73 |
| B2M1R6   | Heterogeneous nuclear ribonucleoprotein K OS=Mus musculus GN=Hnrpk PE=2 SV=1 - [B2M1R6_MOUSE]                  | 56.82 | 8  | 1  | 22 | 304 | 0.98 | 0.75 | 0.84 | 0.65 | 0.95 | 0.87 | 1.03 | 0.83 | 0.89 | 0.82 | 0.92 | 0.69 | 0.79 | 48.53  | 5.54 |
| P46638   | Ras-related protein Rab11B OS=Mus musculus GN=Rab11b PE=1 SV=3 - [RB11B_MOUSE]                                 | 63.76 | 12 | 14 | 14 | 71  | 1.02 | 0.93 | 0.94 | 1.04 | 1.03 | 0.88 | 0.82 | 0.83 | 0.81 | 0.84 | 0.80 | 0.90 | 0.84 | 24.47  | 5.94 |
| Q9J191   | Alpha-actinin-2 OS=Mus musculus GN=Actn2 PE=1 SV=2 - [ACTN2_MOUSE]                                             | 45.97 | 5  | 20 | 36 | 150 | 0.97 | 1.02 | 1.03 | 1.07 | 1.17 | 1.03 | 1.10 | 0.83 | 0.90 | 0.97 | 0.98 | 1.13 | 1.14 | 103.77 | 5.45 |
| Q8C7H1   | Methylmalonic aciduria type A homolog, mitochondrial OS=Mus musculus GN=Mmaa PE=2 SV=1 - [MMAA_MOUSE]          | 3.13  | 1  | 1  | 1  | 2   | 0.98 | 1.00 | 1.02 | 1.00 | 1.02 | 0.69 | 0.70 | 0.83 | 0.84 | 0.93 | 0.95 | 0.94 | 0.97 | 45.90  | 9.32 |

|          |                                                                                                  |       |     |    |     |      |      |      |      |      |      |      |      |      |      |      |      |      |      |        |      |
|----------|--------------------------------------------------------------------------------------------------|-------|-----|----|-----|------|------|------|------|------|------|------|------|------|------|------|------|------|------|--------|------|
| P98200   | Probable phospholipid-transporting ATPase IB OS=Mus musculus GN=Atp8a2 PE=1 SV=1 - [AT8A2_MOUSE] | 3.75  | 5   | 2  | 4   | 6    | 1.01 | 1.04 | 1.02 | 1.02 | 1.01 | 0.81 | 0.80 | 0.83 | 0.82 | 0.88 | 0.87 | 0.99 | 0.99 | 129.33 | 7.33 |
| Q99KK2   | N-acylneuraminase cytidylyltransferase OS=Mus musculus GN=Cmas PE=1 SV=2 - [NEUA_MOUSE]          | 18.98 | 2   | 7  | 7   | 13   | 0.84 | 0.82 | 1.00 | 1.02 | 1.10 | 0.89 | 0.91 | 0.83 | 0.94 | 0.97 | 1.00 | 0.93 | 0.98 | 48.03  | 8.10 |
| Q32P14   | Predicted gene, OTTMUSG00000010173 OS=Mus musculus GN=Gm13051 PE=2 SV=1 - [Q32P14_MOUSE]         | 20.06 | 168 | 1  | 2   | 5    | 0.63 | 0.93 | 1.46 | 0.95 | 1.49 | 1.00 | 1.57 | 0.83 | 1.30 | 0.66 | 1.05 | 0.99 | 1.56 | 74.16  | 8.88 |
| Q9CQN1   | Heat shock protein 75 kDa, mitochondrial OS=Mus musculus GN=Trap1 PE=1 SV=1 - [TRAP1_MOUSE]      | 22.38 | 1   | 11 | 12  | 57   | 0.98 | 1.27 | 1.17 | 1.21 | 1.24 | 0.79 | 0.81 | 0.83 | 0.84 | 0.92 | 0.92 | 0.97 | 0.96 | 80.16  | 6.68 |
| Q8R2T7   | Oxysterol-binding protein OS=Mus musculus GN=Osbp110 PE=2 SV=1 - [Q8R2T7_MOUSE]                  | 4.74  | 1   | 2  | 2   | 3    | 1.18 | 1.44 | 1.23 | 1.15 | 0.98 | 1.07 | 0.90 | 0.83 | 0.70 | 1.31 | 1.12 | 1.07 | 0.91 | 65.76  | 7.39 |
| Q8C8R3   | Isoform 4 of Ankyrin-2 OS=Mus musculus GN=Ank2 - [ANK2_MOUSE]                                    | 58.83 | 6   | 5  | 160 | 1011 | 0.96 | 0.87 | 1.19 | 0.96 | 0.97 | 0.98 | 1.05 | 0.83 | 0.93 | 0.88 | 0.94 | 0.97 | 0.92 | 432.60 | 5.16 |
| P32921-2 | Isoform 2 of Tryptophan-tRNA ligase, cytoplasmic OS=Mus musculus GN=Wars - [SYWC_MOUSE]          | 27.79 | 2   | 10 | 10  | 23   | 1.03 | 0.88 | 0.95 | 1.05 | 1.03 | 0.97 | 0.93 | 0.83 | 0.76 | 0.94 | 0.94 | 0.93 | 0.87 | 53.61  | 7.08 |
| E9Q1N6   | Protein Rasgef1a OS=Mus musculus GN=Rasgef1a PE=2 SV=1 - [E9Q1N6_MOUSE]                          | 1.64  | 1   | 1  | 1   | 1    | 1.90 | 1.77 | 0.93 | 0.88 | 0.46 | 1.07 | 0.56 | 0.83 | 0.43 | 1.16 | 0.61 | 0.96 | 0.51 | 55.79  | 8.02 |
| A2AS98   | Nck-associated protein 1 OS=Mus musculus GN=Nckap1 PE=2 SV=1 - [A2AS98_MOUSE]                    | 25.31 | 4   | 24 | 24  | 57   | 0.98 | 0.88 | 0.90 | 1.09 | 1.15 | 0.84 | 0.85 | 0.83 | 0.81 | 0.85 | 0.89 | 0.90 | 0.96 | 129.43 | 6.68 |
| E0CY49   | Argininosuccinate lyase (Fragment) OS=Mus musculus GN=Asl PE=2 SV=1 - [E0CY49_MOUSE]             | 22.90 | 4   | 5  | 6   | 12   | 0.93 | 0.87 | 0.93 | 1.01 | 1.08 | 1.01 | 0.90 | 0.83 | 0.89 | 1.05 | 1.12 | 1.02 | 1.03 | 29.46  | 6.96 |
| E9QP46   | Nesprin-2 OS=Mus musculus GN=Sye2 PE=2 SV=1 - [E9QP46_MOUSE]                                     | 0.54  | 6   | 2  | 4   | 5    | 1.23 | 1.35 | 1.10 | 1.16 | 0.94 | 0.63 | 0.51 | 0.83 | 0.67 | 0.57 | 0.47 | 0.52 | 0.43 | 781.66 | 5.31 |
| Q8C0Z1   | Protein ITFG3 OS=Mus musculus GN=Itfg3 PE=1 SV=1 - [ITFG3_MOUSE]                                 | 1.98  | 1   | 1  | 1   | 2    | 0.91 | 0.59 | 0.65 | 1.01 | 1.11 | 0.81 | 0.88 | 0.83 | 0.91 | 0.75 | 0.82 | 0.74 | 0.82 | 60.54  | 5.68 |

|          |                                                                                                                             |       |    |    |    |    |      |       |      |      |      |      |      |      |      |      |      |      |      |        |      |
|----------|-----------------------------------------------------------------------------------------------------------------------------|-------|----|----|----|----|------|-------|------|------|------|------|------|------|------|------|------|------|------|--------|------|
| G3XA00   | Glutamate receptor, metabotropic 4<br>OS=Mus musculus<br>GN=Grm4 PE=3 SV=1<br>-[G3XA00_MOUSE]                               | 4.50  | 4  | 2  | 3  | 4  | 2.33 | 22.43 | 4.27 | 1.74 | 0.74 | 2.23 | 0.95 | 0.83 | 0.75 | 1.17 | 0.50 | 1.48 | 0.63 | 101.71 | 8.85 |
| P27612   | Phospholipase A-2-activating protein<br>OS=Mus musculus<br>GN=Plaa PE=2 SV=4<br>-[PLAP_MOUSE]                               | 18.89 | 2  | 12 | 12 | 26 | 0.95 | 1.02  | 1.06 | 1.06 | 1.11 | 0.89 | 0.91 | 0.83 | 0.84 | 0.87 | 0.88 | 0.90 | 0.93 | 87.17  | 6.14 |
| Q61830   | Macrophage mannose receptor 1<br>OS=Mus musculus<br>GN=Mrc1 PE=1 SV=2<br>-[MRC1_MOUSE]                                      | 0.82  | 1  | 1  | 1  | 2  | 0.85 | 1.30  | 1.51 | 0.79 | 0.92 | 0.82 | 0.96 | 0.83 | 0.97 | 0.83 | 0.97 | 0.85 | 1.00 | 164.87 | 6.83 |
| Q9CPU4   | Microsomal glutathione S-transferase 3<br>OS=Mus musculus<br>GN=Mgst3 PE=1 SV=1<br>-[MGST3_MOUSE]                           | 32.03 | 1  | 3  | 3  | 22 | 0.94 | 1.00  | 1.18 | 1.13 | 1.23 | 0.92 | 1.03 | 0.83 | 0.88 | 0.88 | 0.99 | 0.86 | 0.93 | 16.95  | 9.50 |
| D3YVK0   | Acyl-CoA:lysophosphatidylglycerol acyltransferase 1 (Fragment)<br>OS=Mus musculus<br>GN=Lpgat1 PE=2 SV=1<br>-[D3YVK0_MOUSE] | 5.43  | 3  | 1  | 1  | 1  | 0.83 | 0.97  | 1.16 | 1.07 | 1.29 | 0.69 | 0.82 | 0.83 | 0.99 | 0.82 | 0.99 | 0.82 | 0.99 | 25.73  | 9.39 |
| D3Z580   | Protein Celf5<br>OS=Mus musculus<br>GN=Celf5 PE=2 SV=1<br>-[D3Z580_MOUSE]                                                   | 4.31  | 5  | 1  | 2  | 3  | 0.72 | 1.16  | 1.60 | 0.81 | 1.12 | 0.80 | 1.10 | 0.83 | 1.14 | 1.02 | 1.41 | 0.91 | 1.26 | 42.52  | 7.90 |
| Q04859-3 | Isoform 3 of Serine/threonine-protein kinase MAK<br>OS=Mus musculus<br>GN=Mak<br>-[MAK_MOUSE]                               | 3.09  | 51 | 1  | 2  | 5  | 0.99 | 1.55  | 1.57 | 1.19 | 1.21 | 1.14 | 1.15 | 0.83 | 0.84 | 1.03 | 1.04 | 1.02 | 1.04 | 62.09  | 9.58 |
| Q9JIZ9   | Phospholipid scramblase 3<br>OS=Mus musculus<br>GN=Plscr3 PE=1 SV=1<br>-[PLS3_MOUSE]                                        | 15.88 | 2  | 3  | 3  | 6  | 1.01 | 1.12  | 1.11 | 1.04 | 1.02 | 0.88 | 0.88 | 0.83 | 0.83 | 0.95 | 0.94 | 1.16 | 1.15 | 31.78  | 6.38 |
| Q8C163   | Nuclease EXOG, mitochondrial<br>OS=Mus musculus<br>GN=Exog PE=2 SV=1<br>-[EXOG_MOUSE]                                       | 16.58 | 2  | 5  | 5  | 9  | 0.98 | 0.96  | 0.99 | 1.19 | 1.18 | 0.97 | 0.93 | 0.83 | 0.89 | 0.96 | 0.98 | 0.98 | 1.03 | 41.36  | 8.12 |
| B1AU22   | Fibroblast growth factor 13 (Fragment)<br>OS=Mus musculus<br>GN=Fgf13 PE=2 SV=1<br>-[B1AU22_MOUSE]                          | 37.21 | 3  | 1  | 1  | 2  | 1.11 | 1.51  | 1.36 | 0.93 | 0.83 | 0.74 | 0.66 | 0.83 | 0.74 | 0.64 | 0.57 | 0.56 | 0.50 | 4.79   | 6.65 |
| Q9Z2D0   | Myotubularin-related protein 9<br>OS=Mus musculus<br>GN=Mtmr9 PE=2 SV=2<br>-[MTMR9_MOUSE]                                   | 12.11 | 1  | 5  | 5  | 11 | 1.05 | 1.18  | 1.13 | 0.95 | 1.01 | 0.97 | 0.96 | 0.83 | 0.81 | 0.91 | 0.91 | 0.99 | 1.05 | 62.87  | 6.62 |

|          |                                                                                                            |       |   |    |    |    |      |      |      |      |      |      |      |      |      |      |      |      |      |        |      |
|----------|------------------------------------------------------------------------------------------------------------|-------|---|----|----|----|------|------|------|------|------|------|------|------|------|------|------|------|------|--------|------|
| Q9DBC3   | Cap-specific mRNA (nucleoside-2'-O)-methyltransferase 1 OS=Mus musculus GN=Ftsjd2 PE=1 SV=1 - [MTR1_MOUSE] | 4.42  | 3 | 3  | 4  | 5  | 1.01 | 1.34 | 1.08 | 1.00 | 1.05 | 0.90 | 0.98 | 0.83 | 1.01 | 0.92 | 0.89 | 1.10 | 1.10 | 95.62  | 7.27 |
| Q99PU5   | Long-chain-fatty-acid-CoA ligase ACSBG1 OS=Mus musculus GN=Acsbg1 PE=1 SV=1 - [ACBG1_MOUSE]                | 38.00 | 3 | 18 | 18 | 47 | 0.98 | 0.96 | 0.98 | 1.04 | 1.07 | 0.89 | 0.91 | 0.83 | 0.86 | 0.92 | 0.95 | 0.96 | 1.04 | 80.37  | 5.94 |
| Q8BMJ2   | Leucine-tRNA ligase, cytoplasmic OS=Mus musculus GN=Lars PE=2 SV=2 - [SYLC_MOUSE]                          | 22.67 | 1 | 22 | 22 | 35 | 0.99 | 1.07 | 1.06 | 1.09 | 1.14 | 0.90 | 0.93 | 0.83 | 0.86 | 0.97 | 0.98 | 0.97 | 1.01 | 134.11 | 7.05 |
| Q64735-2 | Isoform 2 of Complement component receptor 1-like protein OS=Mus musculus GN=Cr11 - [CR1L_MOUSE]           | 2.27  | 2 | 1  | 1  | 1  | 1.09 | 0.93 | 0.85 | 1.34 | 1.23 | 0.85 | 0.78 | 0.83 | 0.76 | 0.87 | 0.80 | 0.92 | 0.84 | 49.04  | 5.73 |
| Q91XE8   | Transmembrane protein 205 OS=Mus musculus GN=Tmem205 PE=1 SV=1 - [TM205_MOUSE]                             | 8.99  | 1 | 1  | 1  | 2  | 0.84 | 1.04 | 1.24 | 1.07 | 1.28 | 0.85 | 1.01 | 0.83 | 0.99 | 0.86 | 1.03 | 0.98 | 1.17 | 21.17  | 9.42 |
| Q9CYN2   | Signal peptidase complex subunit 2 OS=Mus musculus GN=Spes2 PE=2 SV=1 - [SPCS2_MOUSE]                      | 28.76 | 1 | 3  | 3  | 4  | 1.10 | 1.24 | 1.13 | 1.01 | 0.92 | 1.00 | 0.91 | 0.83 | 0.75 | 1.05 | 0.96 | 1.05 | 0.96 | 24.96  | 8.57 |
| Q9ET01   | Glycogen phosphorylase, liver form OS=Mus musculus GN=Pygl PE=1 SV=4 - [PYGL_MOUSE]                        | 8.47  | 2 | 2  | 8  | 29 | 0.95 | 0.98 | 1.03 | 1.00 | 1.06 | 0.95 | 1.00 | 0.83 | 0.87 | 0.99 | 1.05 | 1.05 | 1.10 | 97.40  | 7.09 |
| Q91WA3   | Histone deacetylase 11 OS=Mus musculus GN=Hdac11 PE=2 SV=1 - [HDA11_MOUSE]                                 | 8.93  | 3 | 3  | 3  | 4  | 1.07 | 1.24 | 1.16 | 1.09 | 0.97 | 0.83 | 0.79 | 0.83 | 0.74 | 0.90 | 0.80 | 1.13 | 1.06 | 39.13  | 7.14 |
| Q3UYV9   | Nuclear cap-binding protein subunit 1 OS=Mus musculus GN=Ncbp1 PE=1 SV=2 - [NCBP1_MOUSE]                   | 3.92  | 1 | 2  | 2  | 4  | 0.76 | 0.98 | 1.29 | 0.83 | 1.09 | 0.70 | 0.92 | 0.83 | 1.10 | 0.81 | 1.08 | 0.80 | 1.06 | 91.87  | 6.64 |
| Q9D2R0   | Acetoacetyl-CoA synthetase OS=Mus musculus GN=Aacs PE=1 SV=1 - [AACS_MOUSE]                                | 3.87  | 1 | 3  | 3  | 5  | 1.12 | 1.28 | 1.12 | 1.07 | 1.01 | 1.10 | 0.98 | 0.83 | 0.74 | 1.06 | 1.01 | 1.07 | 0.95 | 75.15  | 6.71 |
| Q80ZW2   | Protein THEM6 OS=Mus musculus GN=Them6 PE=2 SV=1 - [THEM6_MOUSE]                                           | 25.12 | 1 | 4  | 4  | 13 | 0.90 | 1.07 | 1.11 | 1.03 | 1.08 | 0.81 | 0.89 | 0.83 | 0.89 | 0.89 | 0.89 | 0.86 | 0.98 | 23.79  | 9.11 |
| Q8C0C7   | Phenylalanine-tRNA ligase alpha subunit OS=Mus musculus GN=Farsa PE=2 SV=1 - [SYFA_MOUSE]                  | 13.78 | 2 | 5  | 6  | 11 | 0.96 | 0.93 | 1.02 | 1.01 | 1.07 | 0.91 | 0.95 | 0.83 | 0.92 | 0.89 | 0.96 | 0.92 | 0.99 | 57.56  | 8.28 |

|          |                                                                                                                                                    |       |   |   |   |    |      |      |      |      |      |      |      |      |      |      |      |      |      |        |       |
|----------|----------------------------------------------------------------------------------------------------------------------------------------------------|-------|---|---|---|----|------|------|------|------|------|------|------|------|------|------|------|------|------|--------|-------|
| Q62348   | Translin OS=Mus musculus GN=Tsn PE=1 SV=1 - [TSN_MOUSE]                                                                                            | 16.67 | 1 | 3 | 3 | 5  | 1.01 | 0.96 | 0.97 | 1.11 | 1.08 | 0.89 | 0.88 | 0.83 | 0.86 | 0.94 | 0.90 | 0.97 | 0.91 | 26.18  | 6.44  |
| D3YYG8   | Uncharacterized protein (Fragment) OS=Mus musculus GN=Fam213a PE=2 SV=1 - [D3YYG8_MOUSE]                                                           | 37.14 | 8 | 6 | 6 | 21 | 1.00 | 0.84 | 0.83 | 1.06 | 1.05 | 0.92 | 0.85 | 0.83 | 0.81 | 0.99 | 0.95 | 0.96 | 0.94 | 19.71  | 8.68  |
| Q60809   | CCR4-NOT transcription complex subunit 7 OS=Mus musculus GN=Cnot7 PE=1 SV=1 - [CNOT7_MOUSE]                                                        | 4.91  | 1 | 1 | 1 | 2  | 0.86 | 0.87 | 1.01 | 0.93 | 1.08 | 0.93 | 1.08 | 0.83 | 0.97 | 0.89 | 1.04 | 0.87 | 1.01 | 32.70  | 4.84  |
| Q91ZW3   | SWI/SNF-related matrix-associated actin-dependent regulator of chromatin subfamily A member 5 OS=Mus musculus GN=Smarca5 PE=1 SV=1 - [SMCA5_MOUSE] | 7.61  | 5 | 6 | 6 | 9  | 0.98 | 1.06 | 1.01 | 1.03 | 1.05 | 0.97 | 0.95 | 0.83 | 0.82 | 0.89 | 0.98 | 1.08 | 1.11 | 121.55 | 8.15  |
| Q9DBE0   | Cysteine sulfonic acid decarboxylase OS=Mus musculus GN=Csad PE=2 SV=1 - [CSAD_MOUSE]                                                              | 5.27  | 1 | 2 | 2 | 4  | 1.05 | 1.00 | 0.95 | 1.07 | 1.02 | 0.96 | 0.91 | 0.83 | 0.79 | 0.90 | 0.86 | 1.05 | 1.01 | 55.11  | 6.61  |
| Q91VF2   | Histamine N-methyltransferase OS=Mus musculus GN=Hnmt PE=1 SV=1 - [HNMT_MOUSE]                                                                     | 3.39  | 1 | 1 | 1 | 1  | 0.99 | 0.99 | 1.00 | 1.08 | 1.08 | 1.02 | 1.02 | 0.83 | 0.83 | 1.02 | 1.03 | 0.89 | 0.90 | 33.64  | 5.06  |
| Q8BXC6   | COMM domain-containing protein 2 OS=Mus musculus GN=Commd2 PE=1 SV=1 - [COMD2_MOUSE]                                                               | 5.03  | 1 | 1 | 1 | 2  | 0.92 | 0.67 | 0.73 | 0.96 | 1.04 | 0.94 | 1.02 | 0.83 | 0.90 | 0.95 | 1.04 | 0.80 | 0.87 | 22.83  | 6.62  |
| E9PV14   | Netrin receptor UNC5C OS=Mus musculus GN=Unc5c PE=2 SV=1 - [E9PV14_MOUSE]                                                                          | 0.80  | 3 | 1 | 1 | 1  | 0.99 | 1.11 | 1.12 | 0.99 | 1.00 | 0.92 | 0.92 | 0.83 | 0.84 | 0.87 | 0.88 | 1.06 | 1.07 | 96.57  | 6.49  |
| P55088-2 | Isoform 1 of Aquaporin-4 OS=Mus musculus GN=Aqp4 - [AQP4_MOUSE]                                                                                    | 15.28 | 3 | 5 | 5 | 64 | 1.27 | 1.12 | 0.83 | 1.05 | 0.83 | 0.88 | 0.72 | 0.83 | 0.62 | 0.87 | 0.68 | 0.96 | 0.77 | 32.07  | 6.86  |
| Q78IK4   | Apolipoprotein O-like OS=Mus musculus GN=Apool PE=2 SV=1 - [APOOL_MOUSE]                                                                           | 13.21 | 2 | 3 | 3 | 6  | 1.01 | 0.86 | 0.83 | 1.06 | 1.05 | 0.84 | 0.84 | 0.83 | 0.85 | 0.94 | 0.87 | 0.96 | 0.89 | 29.24  | 9.31  |
| Q8R0Y8   | Mitochondrial coenzyme A transporter SLC25A42 OS=Mus musculus GN=Slc25a42 PE=2 SV=1 - [S2542_MOUSE]                                                | 7.23  | 1 | 2 | 2 | 3  | 1.32 | 1.44 | 1.09 | 1.21 | 0.91 | 0.93 | 0.70 | 0.83 | 0.63 | 0.91 | 0.69 | 1.10 | 0.83 | 35.22  | 10.05 |

|          |                                                                                                         |       |    |   |    |     |      |      |      |      |      |      |      |      |      |      |      |      |      |        |      |
|----------|---------------------------------------------------------------------------------------------------------|-------|----|---|----|-----|------|------|------|------|------|------|------|------|------|------|------|------|------|--------|------|
| Q9Z1S3   | RAS guanyl-releasing protein 1 OS=Mus musculus GN=Rasgrp1 PE=1 SV=1 - [GRP1_MOUSE]                      | 4.40  | 2  | 2 | 2  | 3   | 0.91 | 0.59 | 0.65 | 0.98 | 1.08 | 0.88 | 0.96 | 0.83 | 0.91 | 0.90 | 0.99 | 0.83 | 0.91 | 90.25  | 8.10 |
| Q04690-2 | Isoform 1 of Neurofibromin OS=Mus musculus GN=Nf1 - [NF1_MOUSE]                                         | 4.15  | 4  | 7 | 10 | 15  | 1.09 | 1.03 | 1.05 | 1.08 | 1.07 | 0.90 | 0.83 | 0.83 | 0.78 | 0.94 | 0.91 | 1.00 | 0.94 | 317.02 | 7.27 |
| Q8BFZ9   | Erlin-2 OS=Mus musculus GN=Erlin2 PE=1 SV=1 - [ERLN2_MOUSE]                                             | 26.76 | 2  | 7 | 9  | 20  | 1.11 | 0.98 | 0.85 | 1.13 | 1.01 | 0.87 | 0.84 | 0.83 | 0.75 | 0.93 | 0.84 | 0.94 | 0.84 | 37.85  | 5.50 |
| Q9WV31   | Activity-regulated cytoskeleton-associated protein OS=Mus musculus GN=Arc PE=1 SV=1 - [ARC_MOUSE]       | 2.78  | 1  | 1 | 1  | 1   | 0.87 | 1.34 | 1.54 | 1.06 | 1.22 | 0.69 | 0.79 | 0.83 | 0.96 | 0.78 | 0.90 | 0.93 | 1.07 | 45.29  | 5.39 |
| Q8BGD5   | Carnitine O-palmitoyltransferase 1, brain isoform OS=Mus musculus GN=Cpt1c PE=1 SV=1 - [CPT1C_MOUSE]    | 11.15 | 1  | 5 | 5  | 6   | 1.08 | 1.24 | 1.21 | 1.24 | 1.11 | 0.83 | 0.75 | 0.83 | 0.80 | 0.97 | 0.98 | 0.93 | 0.97 | 89.97  | 7.49 |
| Q99J16   | Ras-related protein Rap1b OS=Mus musculus GN=Rap1b PE=2 SV=2 - [RAP1B_MOUSE]                            | 67.93 | 1  | 5 | 11 | 57  | 1.00 | 0.81 | 0.78 | 1.01 | 0.99 | 0.92 | 0.94 | 0.83 | 0.81 | 0.83 | 0.82 | 0.80 | 0.82 | 20.81  | 5.78 |
| Q99J19   | 1,2-dihydroxy-3-keto-5-methylthiopentene dioxxygenase OS=Mus musculus GN=Adi1 PE=1 SV=1 - [MTND_MOUSE]  | 7.26  | 1  | 1 | 1  | 2   | 0.75 | 0.78 | 1.03 | 0.82 | 1.09 | 0.79 | 1.05 | 0.83 | 1.10 | 0.65 | 0.86 | 0.84 | 1.12 | 21.51  | 5.50 |
| Q9EPR5   | VPS10 domain-containing receptor SorCS2 OS=Mus musculus GN=Sorcs2 PE=1 SV=2 - [SORC2_MOUSE]             | 2.16  | 1  | 2 | 2  | 3   | 1.07 | 1.04 | 0.97 | 0.97 | 0.91 | 0.91 | 0.85 | 0.83 | 0.78 | 0.96 | 0.90 | 1.26 | 1.19 | 128.82 | 7.34 |
| Q9D517   | 1-acyl-sn-glycerol-3-phosphate acyltransferase gamma OS=Mus musculus GN=Agpat3 PE=1 SV=2 - [PLCC_MOUSE] | 15.43 | 1  | 5 | 5  | 9   | 1.07 | 1.03 | 0.99 | 1.16 | 1.12 | 0.81 | 0.79 | 0.83 | 0.79 | 0.98 | 0.91 | 0.99 | 0.92 | 43.27  | 8.51 |
| P39053-3 | Isoform 3 of Dynamin-1 OS=Mus musculus GN=Dnm1 - [DYN1_MOUSE]                                           | 69.92 | 11 | 2 | 55 | 491 | 1.02 | 1.13 | 1.11 | 1.15 | 1.15 | 0.81 | 0.82 | 0.83 | 0.88 | 0.83 | 0.85 | 1.10 | 1.10 | 95.87  | 6.76 |
| Q9Z1Q2   | Abhydrolase domain-containing protein 16A OS=Mus musculus GN=Abhd16a PE=1 SV=3 - [ABHGA_MOUSE]          | 13.62 | 4  | 6 | 6  | 11  | 0.98 | 1.28 | 1.20 | 1.11 | 1.10 | 0.81 | 0.84 | 0.83 | 0.81 | 0.85 | 0.91 | 0.89 | 0.88 | 63.05  | 8.25 |

|        |                                                                                                                                  |       |   |    |    |    |      |      |      |      |      |      |      |      |      |      |      |      |      |        |      |
|--------|----------------------------------------------------------------------------------------------------------------------------------|-------|---|----|----|----|------|------|------|------|------|------|------|------|------|------|------|------|------|--------|------|
| A2RTH5 | Leucine carboxyl methyltransferase 1<br>OS=Mus musculus<br>GN=Lcmt1 PE=2<br>SV=1 -<br>[A2RTH5_MOUSE]                             | 6.33  | 1 | 2  | 2  | 4  | 0.90 | 0.95 | 0.89 | 0.96 | 1.04 | 0.85 | 0.79 | 0.83 | 0.78 | 0.82 | 0.77 | 0.93 | 0.94 | 38.17  | 5.62 |
| Q9CXI3 | DBH-like monooxygenase protein 1<br>OS=Mus musculus<br>GN=Moxd1 PE=1<br>SV=1 -<br>[MOXD1_MOUSE]                                  | 1.63  | 1 | 1  | 1  | 1  | 1.10 | 1.24 | 1.13 | 1.05 | 0.95 | 0.86 | 0.78 | 0.83 | 0.76 | 0.82 | 0.75 | 1.09 | 0.99 | 69.63  | 6.67 |
| O08547 | Vesicle-trafficking protein SEC22b<br>OS=Mus musculus<br>GN=Sec22b PE=1<br>SV=3 -<br>[SC22B_MOUSE]                               | 48.37 | 2 | 9  | 9  | 25 | 0.94 | 1.16 | 1.20 | 1.09 | 1.16 | 0.88 | 0.92 | 0.83 | 0.93 | 0.88 | 0.97 | 0.89 | 0.95 | 24.72  | 8.51 |
| Q8CI71 | Coiled-coil domain-containing protein 132<br>OS=Mus musculus<br>GN=Ccdc132 PE=1<br>SV=2 -<br>[CC132_MOUSE]                       | 17.63 | 5 | 12 | 12 | 24 | 0.89 | 1.01 | 1.15 | 1.07 | 1.22 | 0.83 | 0.95 | 0.83 | 0.92 | 0.94 | 1.03 | 1.06 | 1.12 | 111.10 | 6.07 |
| P17809 | Solute carrier family 2, facilitated glucose transporter member 1<br>OS=Mus musculus<br>GN=Slc2a1 PE=1<br>SV=4 -<br>[GTR1_MOUSE] | 6.91  | 1 | 4  | 4  | 8  | 1.15 | 1.30 | 1.15 | 1.06 | 0.93 | 0.96 | 0.78 | 0.83 | 0.75 | 0.90 | 0.79 | 0.91 | 0.76 | 53.95  | 8.87 |
| Q61735 | Leukocyte surface antigen CD47<br>OS=Mus musculus<br>GN=Cd47 PE=1 SV=2<br>- [CD47_MOUSE]                                         | 12.21 | 2 | 3  | 3  | 29 | 1.00 | 0.95 | 0.97 | 1.08 | 1.07 | 0.88 | 0.85 | 0.83 | 0.83 | 0.91 | 0.89 | 0.91 | 0.93 | 33.08  | 8.63 |
| O88322 | Nidogen-2<br>OS=Mus musculus<br>GN=Nid2 PE=1 SV=2<br>- [NID2_MOUSE]                                                              | 14.54 | 1 | 13 | 13 | 30 | 0.85 | 1.06 | 1.25 | 0.91 | 1.05 | 0.81 | 0.94 | 0.83 | 0.97 | 0.76 | 0.93 | 0.79 | 0.94 | 153.82 | 5.38 |
| E9PXL0 | Protein FAM222B<br>OS=Mus musculus<br>GN=Fam222b PE=2<br>SV=1 -<br>[E9PXL0_MOUSE]                                                | 2.30  | 2 | 1  | 1  | 3  | 1.23 | 1.12 | 0.91 | 0.96 | 0.78 | 1.14 | 0.92 | 0.84 | 0.68 | 1.09 | 0.89 | 0.97 | 0.79 | 45.49  | 8.07 |
| Q3V4B5 | COMM domain-containing protein 6<br>OS=Mus musculus<br>GN=Commf6 PE=2<br>SV=1 -<br>[COMD6_MOUSE]                                 | 14.94 | 1 | 1  | 1  | 2  | 0.90 | 0.60 | 0.67 | 0.81 | 0.90 | 0.94 | 1.03 | 0.84 | 0.92 | 0.78 | 0.87 | 0.99 | 1.09 | 9.79   | 5.38 |
| Q61885 | Myelin-oligodendrocyte glycoprotein<br>OS=Mus musculus<br>GN=Mog PE=1 SV=1<br>- [MOG_MOUSE]                                      | 24.80 | 3 | 6  | 6  | 26 | 0.92 | 1.19 | 1.28 | 1.10 | 1.21 | 0.85 | 0.91 | 0.84 | 0.81 | 0.79 | 0.88 | 0.82 | 0.90 | 28.25  | 7.96 |
| Q7M729 | Sodium channel subunit beta-4<br>OS=Mus musculus<br>GN=Scn4b PE=2<br>SV=1 -<br>[SCN4B_MOUSE]                                     | 3.51  | 1 | 1  | 1  | 3  | 0.82 | 0.87 | 1.06 | 1.14 | 1.38 | 0.94 | 1.13 | 0.84 | 1.01 | 1.02 | 1.24 | 0.92 | 1.12 | 25.18  | 8.82 |

|          |                                                                                                          |       |    |    |    |     |      |      |      |      |      |      |      |      |      |      |      |      |      |        |      |
|----------|----------------------------------------------------------------------------------------------------------|-------|----|----|----|-----|------|------|------|------|------|------|------|------|------|------|------|------|------|--------|------|
| Q8BMF3   | NADP-dependent malic enzyme, mitochondrial OS=Mus musculus GN=Me3 PE=1 SV=2 - [MAON_MOUSE]               | 33.77 | 2  | 12 | 13 | 29  | 0.94 | 0.96 | 1.00 | 1.04 | 1.09 | 0.93 | 0.93 | 0.84 | 0.90 | 0.94 | 0.90 | 0.94 | 0.99 | 67.06  | 7.83 |
| Q921Q3-2 | Isoform 2 of Chitobiosyldiphosphoolichol beta-mannosyltransferase OS=Mus musculus GN=Alg1 - [ALG1_MOUSE] | 2.85  | 2  | 1  | 1  | 3   | 0.93 | 0.84 | 0.90 | 1.13 | 1.22 | 0.88 | 0.94 | 0.84 | 0.90 | 1.00 | 1.08 | 1.01 | 1.10 | 51.41  | 8.21 |
| G3X8P9   | Aldehyde oxidase OS=Mus musculus GN=Aox1 PE=4 SV=1 - [G3X8P9_MOUSE]                                      | 3.68  | 2  | 2  | 2  | 2   | 1.06 | 0.45 | 0.64 | 0.78 | 0.73 | 0.80 | 1.12 | 0.84 | 1.18 | 1.07 | 1.52 | 0.65 | 0.93 | 146.55 | 6.93 |
| Q8BG32   | 26S proteasome non-ATPase regulatory subunit 11 OS=Mus musculus GN=Psm11 PE=1 SV=3 - [PSD11_MOUSE]       | 39.10 | 11 | 13 | 13 | 31  | 0.94 | 1.02 | 1.04 | 0.99 | 1.11 | 0.95 | 1.00 | 0.84 | 0.92 | 0.89 | 0.95 | 1.04 | 1.12 | 47.41  | 6.48 |
| E9Q401   | Ryanodine receptor 2 OS=Mus musculus GN=Ryr2 PE=1 SV=1 - [RYR2_MOUSE]                                    | 7.59  | 2  | 26 | 28 | 51  | 0.91 | 1.00 | 1.04 | 1.12 | 1.27 | 0.86 | 0.93 | 0.84 | 0.92 | 0.90 | 0.98 | 0.95 | 1.03 | 564.46 | 6.09 |
| D3Z410   | Protein Pigg OS=Mus musculus GN=Pigg PE=2 SV=1 - [D3Z410_MOUSE]                                          | 1.44  | 2  | 1  | 1  | 2   | 0.99 | 1.55 | 1.56 | 1.20 | 1.20 | 0.86 | 0.86 | 0.84 | 0.84 | 1.21 | 1.22 | 1.17 | 1.17 | 107.62 | 7.83 |
| P32507-2 | Isoform Alpha of Poliovirus receptor-related protein 2 OS=Mus musculus GN=Pvr12 - [PVR12_MOUSE]          | 3.64  | 2  | 1  | 1  | 2   | 0.98 | 1.14 | 1.16 | 1.35 | 1.37 | 0.97 | 0.99 | 0.84 | 0.85 | 0.99 | 1.01 | 1.07 | 1.09 | 50.75  | 5.48 |
| P28650   | Adenylosuccinate synthetase isozyme 1 OS=Mus musculus GN=Adss1 PE=1 SV=2 - [PURA1_MOUSE]                 | 28.88 | 3  | 9  | 9  | 15  | 0.92 | 0.95 | 0.95 | 0.93 | 1.03 | 0.90 | 0.95 | 0.84 | 0.88 | 0.86 | 0.91 | 0.82 | 0.91 | 50.22  | 8.43 |
| O54990-6 | Isoform 6 of Prominin-1 OS=Mus musculus GN=Prom1 - [PROM1_MOUSE]                                         | 8.87  | 10 | 5  | 5  | 12  | 0.88 | 0.97 | 1.03 | 1.09 | 1.22 | 0.82 | 0.94 | 0.84 | 0.91 | 0.84 | 0.88 | 0.73 | 0.84 | 92.14  | 6.55 |
| Q8CEB6   | 1,5-anhydro-D-fructose reductase OS=Mus musculus GN=Akr1e1 PE=2 SV=1 - [Q8CEB6_MOUSE]                    | 29.80 | 2  | 5  | 5  | 10  | 1.04 | 0.85 | 0.81 | 0.99 | 0.95 | 0.90 | 0.88 | 0.84 | 0.78 | 0.83 | 0.82 | 0.95 | 1.04 | 28.25  | 7.83 |
| P05064   | Fructose-bisphosphate aldolase A OS=Mus musculus GN=Aldoa PE=1 SV=2 - [ALDOA_MOUSE]                      | 88.19 | 6  | 10 | 30 | 898 | 0.87 | 0.90 | 1.02 | 0.96 | 1.09 | 0.85 | 0.95 | 0.84 | 0.94 | 0.82 | 0.93 | 0.85 | 0.96 | 39.33  | 8.09 |
| Q8BHZ0   | Protein FAM49A OS=Mus musculus GN=Fam49a PE=2 SV=1 - [FA49A_MOUSE]                                       | 32.20 | 1  | 5  | 7  | 20  | 0.98 | 0.96 | 0.92 | 1.10 | 1.12 | 0.85 | 0.91 | 0.84 | 0.83 | 0.93 | 0.95 | 1.15 | 1.13 | 37.32  | 6.01 |
| Q8C8N2   | Protein SCAI OS=Mus musculus GN=Scai PE=1 SV=2 - [SCAI_MOUSE]                                            | 36.96 | 3  | 18 | 18 | 53  | 0.92 | 1.04 | 1.11 | 1.09 | 1.10 | 0.86 | 0.90 | 0.84 | 0.89 | 0.83 | 0.89 | 0.85 | 0.88 | 70.23  | 8.60 |



|        |                                                                                                                                     |       |   |    |    |     |      |      |      |      |      |      |      |      |      |      |      |      |      |        |       |
|--------|-------------------------------------------------------------------------------------------------------------------------------------|-------|---|----|----|-----|------|------|------|------|------|------|------|------|------|------|------|------|------|--------|-------|
| Q9CZU6 | Citrate synthase, mitochondrial OS=Mus musculus GN=Cs PE=1 SV=1 - [CISY_MOUSE]                                                      | 48.06 | 1 | 10 | 17 | 114 | 0.97 | 0.99 | 0.91 | 1.09 | 1.09 | 0.88 | 0.92 | 0.84 | 0.86 | 0.95 | 0.97 | 1.02 | 1.03 | 51.70  | 8.57  |
| Q8CGY8 | Isoform 2 of UDP-N-acetylglucosamine--peptide N-acetylglucosaminyltransferase 110 kDa subunit OS=Mus musculus GN=Ogt - [OGT1_MOUSE] | 18.73 | 2 | 14 | 14 | 29  | 1.00 | 0.87 | 0.88 | 1.10 | 1.15 | 0.92 | 0.94 | 0.84 | 0.85 | 0.94 | 0.94 | 0.97 | 0.95 | 115.66 | 6.65  |
| P12657 | Muscarinic acetylcholine receptor M1 OS=Mus musculus GN=Chrm1 PE=2 SV=2 - [ACM1_MOUSE]                                              | 5.65  | 1 | 2  | 2  | 7   | 0.91 | 1.05 | 1.12 | 1.11 | 1.25 | 0.87 | 0.98 | 0.84 | 0.95 | 0.97 | 1.12 | 0.99 | 1.15 | 51.35  | 9.32  |
| Q8CAA7 | Glucose 1,6-bisphosphate synthase OS=Mus musculus GN=Pgm211 PE=1 SV=1 - [PGM2L_MOUSE]                                               | 32.85 | 1 | 7  | 16 | 56  | 1.04 | 1.03 | 1.09 | 1.10 | 1.00 | 0.90 | 0.84 | 0.84 | 0.80 | 0.83 | 0.85 | 0.96 | 0.89 | 70.23  | 6.49  |
| Q8R1K4 | 5-phosphohydroxy-L-lysine phospho-lyase OS=Mus musculus GN=Phykp1 PE=2 SV=1 - [AT2L2_MOUSE]                                         | 5.14  | 3 | 2  | 2  | 3   | 0.99 | 0.90 | 0.91 | 0.93 | 0.93 | 0.80 | 0.80 | 0.84 | 0.84 | 0.76 | 0.76 | 0.96 | 0.96 | 51.93  | 6.46  |
| G3UWD7 | MCG123152 OS=Mus musculus GN=Gm10269 PE=3 SV=1 - [G3UWD7_MOUSE]                                                                     | 7.32  | 2 | 1  | 1  | 1   | 1.10 | 0.68 | 0.62 | 1.03 | 0.94 | 0.90 | 0.82 | 0.84 | 0.76 | 0.85 | 0.78 | 0.98 | 0.89 | 14.58  | 11.06 |
| P52623 | Uridine-cytidine kinase 1 OS=Mus musculus GN=Uck1 PE=2 SV=2 - [LUCK1_MOUSE]                                                         | 25.27 | 3 | 5  | 5  | 11  | 1.08 | 1.06 | 1.02 | 0.98 | 0.95 | 0.96 | 0.83 | 0.84 | 0.77 | 1.02 | 0.89 | 0.95 | 0.91 | 31.05  | 7.88  |
| Q8CC21 | Isoform 2 of Tetratricopeptide repeat protein 19, mitochondrial OS=Mus musculus GN=Ttc19 - [TTC19_MOUSE]                            | 13.64 | 3 | 3  | 3  | 7   | 1.06 | 1.08 | 1.05 | 0.97 | 0.91 | 0.86 | 0.84 | 0.84 | 0.83 | 0.92 | 0.94 | 1.00 | 0.88 | 39.75  | 6.21  |
| Q923X4 | Isoform 2 of Glutaredoxin-2, mitochondrial OS=Mus musculus GN=Glrx2 - [GLRX2_MOUSE]                                                 | 40.65 | 3 | 4  | 4  | 7   | 0.99 | 0.63 | 0.60 | 0.88 | 0.88 | 0.93 | 0.94 | 0.84 | 0.83 | 0.74 | 0.80 | 0.86 | 0.80 | 14.03  | 8.94  |
| Q6PDS3 | Isoform 2 of Sterile alpha and TIR motif-containing protein 1 OS=Mus musculus GN=Sarm1 - [SARM1_MOUSE]                              | 5.42  | 4 | 3  | 3  | 7   | 0.96 | 1.19 | 1.34 | 1.09 | 1.18 | 0.90 | 0.93 | 0.84 | 0.89 | 0.96 | 0.98 | 0.99 | 1.12 | 78.96  | 6.44  |
| P63046 | Sulfotransferase 4A1 OS=Mus musculus GN=Sult4a1 PE=2 SV=1 - [ST4A1_MOUSE]                                                           | 18.31 | 2 | 4  | 4  | 6   | 0.98 | 0.89 | 0.91 | 1.07 | 1.07 | 0.87 | 0.84 | 0.84 | 0.94 | 0.80 | 0.83 | 0.95 | 0.96 | 33.03  | 5.53  |

|          |                                                                                                                    |       |   |    |    |    |      |      |      |      |      |      |      |      |      |      |      |      |      |        |      |
|----------|--------------------------------------------------------------------------------------------------------------------|-------|---|----|----|----|------|------|------|------|------|------|------|------|------|------|------|------|------|--------|------|
| Q61626   | Glutamate receptor ionotropic, kainate 5 OS=Mus musculus GN=Crik5 PE=2 SV=2 - [GRIK5_MOUSE]                        | 1.02  | 1 | 1  | 1  | 2  | 1.00 | 1.34 | 1.33 | 1.13 | 1.12 | 0.91 | 0.90 | 0.84 | 0.83 | 0.91 | 0.91 | 1.02 | 1.02 | 109.21 | 8.21 |
| Q3U1J4   | DNA damage-binding protein 1 OS=Mus musculus GN=Ddb1 PE=1 SV=2 - [DDB1_MOUSE]                                      | 29.39 | 1 | 30 | 30 | 67 | 0.99 | 0.98 | 1.05 | 1.01 | 1.02 | 0.85 | 0.85 | 0.84 | 0.80 | 0.81 | 0.82 | 0.88 | 0.86 | 126.77 | 5.26 |
| Q8BHH2   | Ras-related protein Rab9B OS=Mus musculus GN=Rab9b PE=2 SV=1 - [RAB9B_MOUSE]                                       | 16.42 | 1 | 2  | 2  | 3  | 1.09 | 1.07 | 0.98 | 1.10 | 1.01 | 1.03 | 0.93 | 0.84 | 0.76 | 1.05 | 0.97 | 1.34 | 1.23 | 22.69  | 4.93 |
| Q8BHS7-2 | Isoform 2 of WD repeat containing protein 48 OS=Mus musculus GN=Wdr48 - [WDR48_MOUSE]                              | 23.56 | 3 | 14 | 14 | 34 | 0.97 | 1.05 | 1.06 | 1.07 | 1.11 | 0.88 | 0.91 | 0.84 | 0.88 | 0.91 | 0.93 | 0.93 | 0.98 | 74.35  | 7.17 |
| Q9R1Z8   | Vinexin OS=Mus musculus GN=Sorbs3 PE=1 SV=1 - [VINEX_MOUSE]                                                        | 10.64 | 1 | 6  | 6  | 12 | 0.94 | 0.93 | 0.96 | 1.01 | 1.04 | 0.77 | 0.73 | 0.84 | 0.84 | 0.86 | 0.78 | 0.83 | 0.75 | 82.30  | 9.20 |
| Q8BFX3   | BTB/POZ domain-containing protein KCTD3 OS=Mus musculus GN=Kctd3 PE=2 SV=1 - [KCTD3_MOUSE]                         | 8.47  | 3 | 5  | 5  | 8  | 1.06 | 1.00 | 0.88 | 0.95 | 0.90 | 0.79 | 0.74 | 0.84 | 0.66 | 0.82 | 0.67 | 0.79 | 0.74 | 88.81  | 7.15 |
| Q78YY6   | DnaJ homolog subfamily C member 15 OS=Mus musculus GN=Dnajc15 PE=2 SV=1 - [DJC15_MOUSE]                            | 11.41 | 1 | 1  | 2  | 4  | 0.93 | 0.80 | 0.86 | 0.97 | 1.05 | 0.99 | 1.06 | 0.84 | 0.90 | 0.93 | 1.00 | 0.91 | 0.98 | 15.94  | 9.99 |
| Q8BK5-   | Isoform 2 of Importin-5 OS=Mus musculus GN=Ipo5 - [IPOS_MOUSE]                                                     | 13.89 | 2 | 9  | 10 | 18 | 1.01 | 0.99 | 0.89 | 1.03 | 0.99 | 0.90 | 0.89 | 0.84 | 0.82 | 0.89 | 0.86 | 1.11 | 1.07 | 116.84 | 4.92 |
| Q9QZD8   | Mitochondrial dicarboxylate carrier OS=Mus musculus GN=Slc25a10 PE=2 SV=2 - [DIC_MOUSE]                            | 15.33 | 1 | 4  | 4  | 7  | 1.17 | 1.37 | 1.18 | 1.28 | 1.08 | 0.83 | 0.74 | 0.84 | 0.77 | 0.94 | 0.81 | 1.11 | 1.00 | 31.69  | 9.32 |
| Q3UR70   | Transforming growth factor-beta receptor-associated protein 1 OS=Mus musculus GN=Tgfbra1 PE=2 SV=1 - [TGFA1_MOUSE] | 4.19  | 1 | 3  | 3  | 5  | 0.90 | 0.93 | 1.04 | 1.14 | 1.20 | 0.82 | 0.92 | 0.84 | 0.93 | 0.88 | 0.98 | 1.05 | 1.14 | 97.24  | 6.70 |
| Q5S003   | Sperm-associated antigen 17 OS=Mus musculus GN=Spag17 PE=1 SV=1 - [SPG17_MOUSE]                                    | 0.55  | 2 | 1  | 2  | 2  | 0.88 | 0.78 | 0.89 | 0.65 | 0.74 | 0.69 | 0.78 | 0.84 | 0.95 | 0.76 | 0.86 | 0.54 | 0.61 | 246.23 | 6.01 |

|          |                                                                                                                           |       |    |    |    |     |      |      |      |      |      |      |      |      |      |      |      |      |      |        |      |
|----------|---------------------------------------------------------------------------------------------------------------------------|-------|----|----|----|-----|------|------|------|------|------|------|------|------|------|------|------|------|------|--------|------|
| Q8K2B3   | Succinate dehydrogenase [ubiquinone] flavoprotein subunit, mitochondrial OS=Mus musculus GN=Sdha PE=1 SV=1 - [DHSA_MOUSE] | 56.78 | 1  | 25 | 25 | 255 | 0.98 | 0.96 | 0.99 | 0.97 | 0.97 | 0.87 | 0.87 | 0.84 | 0.85 | 0.86 | 0.86 | 0.89 | 0.91 | 72.54  | 7.37 |
| P25911-2 | Isoform 2 of Tyrosine-protein kinase Lyn OS=Mus musculus GN=Lyn - [LYN_MOUSE]                                             | 7.74  | 50 | 1  | 4  | 11  | 0.93 | 1.02 | 1.10 | 1.11 | 1.20 | 0.82 | 0.87 | 0.84 | 0.90 | 0.93 | 1.00 | 1.07 | 1.15 | 56.25  | 6.57 |
| Q9D0Q7   | 39S ribosomal protein L45, mitochondrial OS=Mus musculus GN=Mrlp45 PE=2 SV=1 - [RM45_MOUSE]                               | 11.76 | 1  | 2  | 2  | 3   | 1.02 | 0.76 | 0.75 | 1.04 | 1.02 | 0.87 | 0.85 | 0.84 | 0.82 | 0.86 | 0.84 | 0.89 | 0.88 | 35.39  | 9.23 |
| Q8K004   | Protein Spata2 OS=Mus musculus GN=Spata2 PE=2 SV=1 - [Q8K004_MOUSE]                                                       | 2.33  | 1  | 1  | 1  | 3   | 0.81 | 0.71 | 0.88 | 0.85 | 1.05 | 0.96 | 1.18 | 0.84 | 1.03 | 0.85 | 1.05 | 0.78 | 0.96 | 57.77  | 8.63 |
| Q9QZX7   | Isoform 2 of Serine racemase OS=Mus musculus GN=Srr - [SRR_MOUSE]                                                         | 36.31 | 4  | 8  | 8  | 30  | 1.08 | 0.93 | 0.82 | 1.01 | 0.93 | 0.83 | 0.71 | 0.84 | 0.77 | 0.80 | 0.75 | 0.90 | 0.78 | 34.01  | 6.01 |
| Q11011   | Puromycin-sensitive aminopeptidase OS=Mus musculus GN=Npepps PE=1 SV=2 - [PSA_MOUSE]                                      | 39.46 | 7  | 30 | 30 | 87  | 0.99 | 0.87 | 0.91 | 1.10 | 1.12 | 0.88 | 0.88 | 0.84 | 0.87 | 0.94 | 0.98 | 1.00 | 1.01 | 103.26 | 5.90 |
| Q06335   | Amyloid-like protein 2 OS=Mus musculus GN=Aplp2 PE=1 SV=4 - [APLP2_MOUSE]                                                 | 21.78 | 2  | 1  | 14 | 38  | 0.92 | 1.55 | 1.09 | 1.15 | 1.15 | 1.08 | 0.96 | 0.84 | 0.81 | 1.10 | 0.82 | 0.92 | 0.78 | 80.42  | 4.70 |
| Q6P9K9   | Neurexin-3 OS=Mus musculus GN=Nrxn3 PE=1 SV=2 - [NRX3A_MOUSE]                                                             | 29.73 | 3  | 22 | 35 | 143 | 0.99 | 1.05 | 1.04 | 1.02 | 1.01 | 0.86 | 0.83 | 0.84 | 0.86 | 0.87 | 0.84 | 0.85 | 0.87 | 173.32 | 6.14 |
| E9Q0K9   | ELMO domain-containing protein 1 OS=Mus musculus GN=Elmod1 PE=2 SV=1 - [E9Q0K9_MOUSE]                                     | 4.91  | 2  | 1  | 1  | 2   | 0.86 | 0.97 | 1.14 | 1.06 | 1.24 | 0.84 | 0.98 | 0.84 | 0.98 | 0.88 | 1.03 | 0.88 | 1.03 | 37.88  | 8.28 |
| Q9D0M3   | Isoform 2 of Cytochrome c1, heme protein, mitochondrial OS=Mus musculus GN=Cyc1 - [CY1_MOUSE]                             | 41.35 | 2  | 7  | 7  | 90  | 0.93 | 1.03 | 1.07 | 1.02 | 1.10 | 0.86 | 0.96 | 0.84 | 0.92 | 0.81 | 0.94 | 0.91 | 0.97 | 29.48  | 7.05 |
| Q9CRV7   | Glycerophosphodiester phosphodiesterase domain-containing protein 1 OS=Mus musculus GN=Gdpd1 PE=2 SV=1 - [GDPD1_MOUSE]    | 12.74 | 1  | 3  | 3  | 7   | 1.03 | 1.01 | 0.88 | 1.30 | 1.18 | 0.91 | 0.84 | 0.84 | 0.87 | 0.95 | 0.88 | 0.99 | 1.09 | 35.84  | 8.31 |
| P26039   | Talin-1 OS=Mus musculus GN=Tln1 PE=1 SV=2 - [TLN1_MOUSE]                                                                  | 11.37 | 3  | 13 | 19 | 35  | 0.97 | 0.90 | 0.92 | 1.07 | 1.10 | 0.88 | 0.94 | 0.84 | 0.88 | 0.96 | 0.98 | 0.98 | 1.05 | 269.65 | 6.18 |

|        |                                                                                                                                           |       |    |    |    |     |      |      |      |      |      |      |      |      |      |      |      |      |      |       |      |
|--------|-------------------------------------------------------------------------------------------------------------------------------------------|-------|----|----|----|-----|------|------|------|------|------|------|------|------|------|------|------|------|------|-------|------|
| Q9D0K1 | Peroxisomal membrane protein PEX13<br>OS=Mus musculus<br>GN=Pex13 PE=1<br>SV=1 -<br>[PEX13_MOUSE]                                         | 9.14  | 1  | 1  | 1  | 5   | 0.91 | 1.06 | 1.17 | 0.91 | 1.00 | 1.15 | 1.26 | 0.84 | 0.92 | 1.05 | 1.16 | 1.05 | 1.16 | 44.58 | 7.53 |
| Q8VIJ6 | Splicing factor, proline- and glutamine-rich<br>OS=Mus musculus<br>GN=Sfpq PE=1 SV=1 -<br>[SFPQ_MOUSE]                                    | 43.20 | 1  | 27 | 28 | 215 | 0.97 | 0.85 | 0.90 | 0.90 | 0.92 | 0.79 | 0.82 | 0.84 | 0.86 | 0.72 | 0.77 | 0.73 | 0.78 | 75.39 | 9.44 |
| Q01065 | Calcium/calmodulin-dependent 3',5'-cyclic nucleotide phosphodiesterase 1B<br>OS=Mus musculus<br>GN=Pdel1b PE=1<br>SV=2 -<br>[PDE1B_MOUSE] | 29.35 | 1  | 12 | 12 | 27  | 1.02 | 1.06 | 1.07 | 1.31 | 1.36 | 0.98 | 1.02 | 0.84 | 0.83 | 1.18 | 1.17 | 1.43 | 1.38 | 61.19 | 5.72 |
| D3Z5T2 | Armadillo repeat-containing protein 10<br>OS=Mus musculus<br>GN=Armc10 PE=2<br>SV=1 -<br>[D3Z5T2_MOUSE]                                   | 23.11 | 3  | 4  | 4  | 6   | 1.02 | 1.19 | 1.01 | 1.13 | 1.12 | 0.88 | 0.80 | 0.84 | 0.82 | 1.01 | 0.92 | 0.91 | 0.92 | 25.79 | 8.85 |
| P58242 | Acid sphingomyelinase-like phosphodiesterase 3b<br>OS=Mus musculus<br>GN=Smpd3b PE=1<br>SV=1 -<br>[ASM3B_MOUSE]                           | 14.04 | 1  | 3  | 3  | 7   | 1.24 | 1.20 | 1.01 | 0.97 | 0.76 | 0.90 | 0.73 | 0.84 | 0.62 | 0.89 | 0.70 | 1.17 | 0.99 | 51.57 | 6.43 |
| Q8BR90 | Isoform 2 of UPF0600 protein C5orf51 homolog<br>OS=Mus musculus -<br>[CE051_MOUSE]                                                        | 6.19  | 2  | 1  | 1  | 2   | 0.88 | 0.87 | 0.99 | 1.15 | 1.31 | 1.00 | 1.14 | 0.84 | 0.95 | 1.10 | 1.25 | 1.11 | 1.26 | 26.11 | 5.34 |
| Q9CQE8 | UPF0568 protein C14orf166 homolog<br>OS=Mus musculus<br>PE=2 SV=1 -<br>[CN166_MOUSE]                                                      | 60.25 | 2  | 12 | 12 | 36  | 0.88 | 0.79 | 0.87 | 0.85 | 0.95 | 0.81 | 0.92 | 0.84 | 0.92 | 0.75 | 0.84 | 0.80 | 0.87 | 28.13 | 6.89 |
| P01668 | Ig kappa chain V-III region PC 7210<br>OS=Mus musculus<br>PE=1 SV=1 -<br>[KV3AG_MOUSE]                                                    | 16.36 | 17 | 1  | 1  | 1   | 0.94 | 1.09 | 1.15 | 1.07 | 1.14 | 0.77 | 0.82 | 0.84 | 0.89 | 1.09 | 1.15 | 1.12 | 1.18 | 11.94 | 4.75 |
| Q8BZW8 | NHL repeat-containing protein 2<br>OS=Mus musculus<br>GN=Nhlrc2<br>PE=2 SV=1 -<br>[NHLC2_MOUSE]                                           | 9.24  | 1  | 4  | 4  | 11  | 0.82 | 1.18 | 1.16 | 0.89 | 1.05 | 0.80 | 0.91 | 0.84 | 1.00 | 0.79 | 0.97 | 0.84 | 1.02 | 78.38 | 5.54 |
| P63085 | Mitogen-activated protein kinase 1<br>OS=Mus musculus<br>GN=Mapk1 PE=1<br>SV=3 -<br>[MK01_MOUSE]                                          | 50.84 | 17 | 11 | 16 | 77  | 1.07 | 0.92 | 0.84 | 1.00 | 0.91 | 0.95 | 0.85 | 0.84 | 0.79 | 0.93 | 0.85 | 1.01 | 0.97 | 41.25 | 6.98 |
| Q96DY5 | Isoform 2 of RING finger protein 112<br>OS=Mus musculus<br>GN=Rnf112 -<br>[RN112_MOUSE]                                                   | 2.06  | 3  | 1  | 1  | 1   | 1.09 | 1.31 | 1.20 | 1.07 | 0.98 | 0.91 | 0.84 | 0.84 | 0.77 | 0.93 | 0.86 | 0.80 | 0.74 | 68.73 | 8.51 |
| Q8K4Z0 | Isoform 2 of Leucine-rich repeat LGI family member 2<br>OS=Mus musculus<br>GN=Lgi2 -<br>[LGI2_MOUSE]                                      | 12.18 | 2  | 6  | 6  | 10  | 0.98 | 1.10 | 1.09 | 1.02 | 1.06 | 0.94 | 0.95 | 0.84 | 0.85 | 0.85 | 0.86 | 0.92 | 1.02 | 61.97 | 6.54 |

|        |                                                                                                                              |       |   |    |    |     |      |      |      |      |      |      |      |      |      |      |      |      |      |        |      |
|--------|------------------------------------------------------------------------------------------------------------------------------|-------|---|----|----|-----|------|------|------|------|------|------|------|------|------|------|------|------|------|--------|------|
| D3Z217 | Thiopurine S-methyltransferase (Fragment) OS=Mus musculus GN=Tpm1 PE=2 SV=1 - [D3Z217_MOUSE]                                 | 16.48 | 6 | 3  | 3  | 5   | 1.15 | 0.99 | 0.81 | 1.05 | 0.86 | 1.00 | 0.94 | 0.84 | 0.73 | 1.01 | 0.90 | 1.07 | 0.93 | 20.83  | 6.64 |
| A2AAN0 | Exocyst complex component 7 OS=Mus musculus GN=Exoc7 PE=2 SV=1 - [A2AAN0_MOUSE]                                              | 11.40 | 4 | 7  | 7  | 13  | 0.88 | 0.99 | 1.11 | 1.08 | 1.12 | 0.91 | 0.92 | 0.84 | 0.90 | 0.94 | 1.01 | 1.03 | 1.09 | 78.46  | 7.11 |
| Q3UPH1 | Protein PRRC1 OS=Mus musculus GN=Prc1 PE=2 SV=1 - [PRRC1_MOUSE]                                                              | 3.39  | 1 | 1  | 1  | 4   | 0.84 | 0.84 | 1.00 | 0.94 | 1.12 | 0.88 | 1.04 | 0.84 | 1.00 | 0.85 | 1.01 | 0.80 | 0.96 | 46.27  | 5.95 |
| P17427 | AP-2 complex subunit alpha-2 OS=Mus musculus GN=Ap2a2 PE=1 SV=2 - [AP2A2_MOUSE]                                              | 46.38 | 2 | 26 | 37 | 119 | 1.05 | 1.09 | 1.07 | 1.15 | 1.11 | 0.86 | 0.83 | 0.84 | 0.79 | 0.95 | 0.90 | 1.10 | 1.01 | 103.95 | 6.93 |
| G3UYK8 | Coronin OS=Mus musculus GN=Coro1a PE=2 SV=1 - [G3UYK8_MOUSE]                                                                 | 33.16 | 4 | 1  | 14 | 40  | 0.74 | 0.75 | 0.99 | 0.96 | 1.29 | 0.78 | 1.05 | 0.84 | 1.14 | 0.80 | 1.00 | 0.69 | 0.93 | 43.23  | 6.74 |
| Q8BH69 | Selenide, water dikinase 1 OS=Mus musculus GN=Seps1 PE=2 SV=1 - [SPS1_MOUSE]                                                 | 18.62 | 1 | 5  | 5  | 8   | 1.03 | 0.90 | 0.88 | 1.02 | 0.89 | 0.93 | 0.77 | 0.84 | 0.72 | 0.79 | 0.62 | 0.87 | 0.84 | 42.88  | 5.97 |
| Q8CDM8 | Isoform 2 of Protein FAM160B1 OS=Mus musculus GN=Fam160b1 - [F16B1_MOUSE]                                                    | 2.29  | 2 | 1  | 1  | 2   | 0.77 | 0.89 | 1.17 | 0.94 | 1.23 | 0.78 | 1.02 | 0.84 | 1.10 | 0.81 | 1.06 | 1.08 | 1.41 | 58.50  | 5.10 |
| Q9CZW4 | Long-chain-fatty-acid-CoA ligase 3 OS=Mus musculus GN=Acs13 PE=2 SV=2 - [ACSL3_MOUSE]                                        | 14.86 | 3 | 7  | 7  | 37  | 1.00 | 1.15 | 1.21 | 1.06 | 1.09 | 0.90 | 0.89 | 0.84 | 0.90 | 0.93 | 0.94 | 1.01 | 1.08 | 80.44  | 8.54 |
| F8VQE9 | Arf-GAP with GTPase, ANK repeat and PH domain-containing protein 3 OS=Mus musculus GN=Agap3 PE=2 SV=1 - [F8VQE9_MOUSE]       | 10.00 | 3 | 5  | 7  | 13  | 0.99 | 0.94 | 0.95 | 0.99 | 1.00 | 0.83 | 0.83 | 0.84 | 0.82 | 0.99 | 0.99 | 1.01 | 1.02 | 97.63  | 7.77 |
| B2RS16 | Leucine rich repeat containing 8 family, member B OS=Mus musculus GN=Lrc8b PE=2 SV=1 - [B2RS16_MOUSE]                        | 3.49  | 2 | 2  | 2  | 3   | 1.00 | 1.07 | 1.06 | 1.02 | 1.01 | 0.84 | 0.84 | 0.84 | 0.84 | 0.94 | 0.94 | 0.88 | 0.88 | 92.13  | 6.70 |
| Q8K2C9 | Very-long-chain (3R)-3-hydroxyacyl-[acyl-carrier protein] dehydratase 3 OS=Mus musculus GN=ptplad1 PE=1 SV=2 - [HACD3_MOUSE] | 11.60 | 1 | 4  | 4  | 29  | 0.98 | 1.20 | 1.12 | 1.21 | 1.11 | 0.91 | 0.91 | 0.84 | 0.89 | 0.93 | 0.93 | 1.08 | 1.05 | 43.10  | 9.13 |

|        |                                                                                                                     |       |   |    |    |    |      |      |      |      |      |      |      |      |      |      |      |      |      |        |      |
|--------|---------------------------------------------------------------------------------------------------------------------|-------|---|----|----|----|------|------|------|------|------|------|------|------|------|------|------|------|------|--------|------|
| Q61823 | Programmed cell death protein 4 OS=Mus musculus GN=Pdcd4 PE=1 SV=1 - [PDCD4_MOUSE]                                  | 16.20 | 1 | 5  | 5  | 12 | 1.11 | 0.98 | 0.87 | 0.94 | 0.83 | 0.91 | 0.84 | 0.84 | 0.77 | 0.92 | 0.80 | 1.14 | 0.94 | 51.67  | 5.16 |
| D3YTU5 | Protein Ankr29 OS=Mus musculus GN=Ankr29 PE=2 SV=1 - [D3YTU5_MOUSE]                                                 | 22.10 | 2 | 4  | 4  | 6  | 0.83 | 1.06 | 1.21 | 0.87 | 1.05 | 0.91 | 1.09 | 0.84 | 0.98 | 0.80 | 0.91 | 0.85 | 1.01 | 29.90  | 8.18 |
| Q6PE80 | Axl protein OS=Mus musculus GN=Axl PE=2 SV=1 - [Q6PE80_MOUSE]                                                       | 1.25  | 2 | 1  | 1  | 1  | 0.88 | 0.91 | 1.03 | 0.91 | 1.02 | 0.82 | 0.92 | 0.84 | 0.95 | 0.79 | 0.89 | 0.81 | 0.92 | 97.16  | 5.64 |
| P50544 | Very long-chain specific acyl-CoA dehydrogenase, mitochondrial OS=Mus musculus GN=Acadvl PE=1 SV=3 - [ACADV_MOUSE]  | 20.73 | 2 | 11 | 11 | 21 | 0.94 | 0.97 | 1.01 | 1.11 | 1.19 | 0.84 | 0.92 | 0.84 | 0.87 | 0.97 | 0.93 | 0.78 | 0.82 | 70.83  | 8.75 |
| Q61672 | Equilibrative nucleoside transporter 2 OS=Mus musculus GN=Slc29a2 PE=1 SV=2 - [S29A2_MOUSE]                         | 2.63  | 1 | 1  | 1  | 2  | 1.10 | 1.09 | 0.99 | 1.23 | 1.12 | 0.82 | 0.74 | 0.84 | 0.76 | 1.03 | 0.94 | 1.06 | 0.96 | 50.22  | 6.51 |
| Q9WV96 | Mitochondrial import inner membrane translocase subunit Tim10 B OS=Mus musculus GN=Timm10b PE=2 SV=1 - [T10B_MOUSE] | 27.00 | 4 | 2  | 2  | 5  | 1.02 | 1.04 | 0.97 | 1.01 | 0.94 | 0.80 | 0.78 | 0.84 | 0.82 | 0.95 | 0.89 | 1.06 | 1.02 | 11.31  | 7.08 |
| D3YW48 | Calpain small subunit 1 (Fragment) OS=Mus musculus GN=Capns1 PE=2 SV=1 - [D3YW48_MOUSE]                             | 29.46 | 3 | 3  | 3  | 6  | 1.04 | 0.98 | 0.97 | 0.93 | 0.92 | 0.88 | 0.85 | 0.84 | 0.84 | 0.95 | 0.81 | 0.93 | 0.85 | 25.29  | 5.60 |
| P51863 | V-type proton ATPase subunit d 1 OS=Mus musculus GN=Atp6v0d1 PE=1 SV=2 - [VA0D1_MOUSE]                              | 44.16 | 1 | 14 | 14 | 61 | 0.99 | 0.94 | 0.90 | 1.08 | 1.15 | 0.88 | 0.87 | 0.84 | 0.86 | 0.89 | 0.90 | 0.90 | 0.97 | 40.28  | 5.00 |
| Q8BMS1 | Trifunctional enzyme subunit alpha, mitochondrial OS=Mus musculus GN=Hadha PE=1 SV=1 - [ECHA_MOUSE]                 | 33.68 | 1 | 21 | 21 | 48 | 1.01 | 1.00 | 0.98 | 1.18 | 1.16 | 0.87 | 0.85 | 0.84 | 0.80 | 0.96 | 0.93 | 0.93 | 0.91 | 82.62  | 9.14 |
| Q69ZQ1 | Uncharacterized family 31 glucosidase KIAA1161 OS=Mus musculus GN=Kiaa1161 PE=1 SV=2 - [K1161_MOUSE]                | 1.54  | 1 | 1  | 1  | 2  | 0.92 | 1.05 | 1.13 | 0.98 | 1.06 | 0.84 | 0.91 | 0.84 | 0.91 | 1.04 | 1.13 | 0.90 | 0.98 | 81.31  | 8.29 |
| Q8C4G3 | Probable phospholipid-transporting ATPase IIA OS=Mus musculus GN=Atp9a PE=2 SV=1 - [Q8C4G3_MOUSE]                   | 3.40  | 4 | 2  | 3  | 5  | 1.02 | 1.26 | 1.23 | 1.15 | 1.13 | 0.93 | 0.91 | 0.84 | 0.82 | 1.01 | 0.99 | 1.09 | 1.07 | 116.35 | 7.27 |

|          |                                                                                                     |       |   |    |    |      |      |      |      |      |      |       |      |      |      |      |      |      |      |        |      |
|----------|-----------------------------------------------------------------------------------------------------|-------|---|----|----|------|------|------|------|------|------|-------|------|------|------|------|------|------|------|--------|------|
| O35343   | Importin subunit alpha-3 OS=Mus musculus GN=Kpna4 PE=2 SV=1 - [IMA3_MOUSE]                          | 19.00 | 2 | 4  | 6  | 15   | 1.02 | 1.22 | 1.25 | 0.96 | 1.06 | 0.69  | 0.78 | 0.84 | 0.90 | 1.00 | 1.02 | 1.17 | 1.18 | 57.89  | 4.94 |
| Q80UG2   | Plexin-A4 OS=Mus musculus GN=Plxn4 PE=1 SV=3 - [PLXA4_MOUSE]                                        | 18.38 | 1 | 18 | 26 | 52   | 0.97 | 1.08 | 1.15 | 1.07 | 1.09 | 0.85  | 0.87 | 0.84 | 0.87 | 0.90 | 0.95 | 1.00 | 1.02 | 212.42 | 6.83 |
| Q9DBS2   | Tumor protein p63-regulated gene 1-like protein OS=Mus musculus GN=Trpg11 PE=1 SV=1 - [TPRGL_MOUSE] | 43.61 | 2 | 6  | 6  | 24   | 1.15 | 0.99 | 0.90 | 1.08 | 0.98 | 0.98  | 0.85 | 0.84 | 0.75 | 0.99 | 0.85 | 1.22 | 1.09 | 29.80  | 7.37 |
| Q99J47-2 | Isoform 2 of Dehydrogenase/reductase SDR family member 7B OS=Mus musculus GN=Dhrs7b - [DRS7B_MOUSE] | 4.78  | 2 | 1  | 1  | 6    | 0.95 | 0.88 | 0.92 | 1.09 | 1.14 | 0.89  | 1.01 | 0.84 | 0.97 | 1.08 | 1.25 | 1.02 | 1.18 | 33.96  | 9.50 |
| Q61191   | Host cell factor 1 OS=Mus musculus GN=Hcf1 PE=1 SV=2 - [HCFC1_MOUSE]                                | 8.95  | 3 | 11 | 11 | 20   | 0.96 | 0.89 | 0.94 | 0.99 | 1.01 | 0.94  | 0.95 | 0.84 | 0.92 | 0.83 | 0.91 | 0.83 | 0.85 | 210.31 | 7.18 |
| P68134   | Actin, alpha skeletal muscle OS=Mus musculus GN=Acta1 PE=1 SV=1 - [ACTS_MOUSE]                      | 70.03 | 4 | 2  | 26 | 1018 | 1.29 | 1.52 | 1.18 | 1.29 | 1.00 | 10.75 | 8.31 | 0.84 | 0.65 | 1.30 | 1.01 | 1.21 | 0.94 | 42.02  | 5.39 |
| Q9JIK5   | Nucleolar RNA helicase 2 OS=Mus musculus GN=Ddx21 PE=1 SV=3 - [DDX21_MOUSE]                         | 2.70  | 1 | 2  | 2  | 3    | 0.87 | 1.01 | 1.16 | 0.99 | 1.14 | 0.91  | 1.03 | 0.84 | 0.96 | 0.97 | 1.11 | 0.96 | 1.11 | 93.49  | 9.11 |
| G3UYQ3   | Phosphatidyserine synthase 2 OS=Mus musculus GN=Ptdss2 PE=4 SV=1 - [G3UYQ3_MOUSE]                   | 16.25 | 3 | 1  | 1  | 3    | 1.24 | 1.11 | 0.89 | 1.07 | 0.86 | 0.97  | 0.77 | 0.84 | 0.68 | 1.07 | 0.86 | 0.95 | 0.76 | 8.85   | 6.58 |
| Q80TE0-2 | Isoform 2 of RNA polymerase II-associated protein 1 OS=Mus musculus GN=Rpap1 - [RPAP1_MOUSE]        | 1.32  | 2 | 1  | 1  | 1    | 0.98 | 1.21 | 1.22 | 0.68 | 0.69 | 1.17  | 1.18 | 0.84 | 0.86 | 0.97 | 0.99 | 0.91 | 0.92 | 141.51 | 6.60 |
| P56564   | Excitatory amino acid transporter 1 OS=Mus musculus GN=Slc1a3 PE=1 SV=2 - [EAA1_MOUSE]              | 30.20 | 3 | 9  | 11 | 185  | 1.09 | 1.02 | 0.88 | 1.16 | 1.05 | 0.85  | 0.76 | 0.84 | 0.76 | 0.98 | 0.89 | 0.97 | 0.87 | 59.58  | 8.40 |
| O35604   | Niemann-Pick C1 protein OS=Mus musculus GN=Npc1 PE=1 SV=2 - [NPC1_MOUSE]                            | 0.94  | 1 | 1  | 1  | 2    | 1.13 | 1.25 | 1.11 | 1.10 | 0.98 | 0.86  | 0.76 | 0.84 | 0.75 | 0.92 | 0.81 | 1.05 | 0.93 | 142.79 | 5.71 |
| E9QAT6   | DNA fragmentation factor subunit beta OS=Mus musculus GN=Cad PE=2 SV=1 - [E9QAT6_MOUSE]             | 1.34  | 5 | 1  | 1  | 1    | 0.94 | 0.94 | 0.99 | 0.99 | 1.05 | 0.89  | 0.94 | 0.85 | 0.89 | 0.83 | 0.88 | 1.02 | 1.09 | 105.62 | 6.28 |
| P24549   | Retinal dehydrogenase 1 OS=Mus musculus GN=Aldh1a1 PE=1 SV=5 - [AL1A1_MOUSE]                        | 31.94 | 3 | 10 | 11 | 20   | 1.02 | 0.92 | 0.88 | 1.28 | 1.22 | 0.85  | 0.95 | 0.85 | 0.97 | 1.05 | 1.14 | 1.14 | 1.12 | 54.43  | 7.80 |

|        |                                                                                                               |       |    |    |    |    |      |      |      |      |      |      |      |      |      |      |      |      |      |        |      |
|--------|---------------------------------------------------------------------------------------------------------------|-------|----|----|----|----|------|------|------|------|------|------|------|------|------|------|------|------|------|--------|------|
| B1AU25 | Apoptosis-inducing factor 1, mitochondrial<br>OS=Mus musculus<br>GN=Aifm1 PE=2<br>SV=1 -<br>[B1AU25_MOUSE]    | 33.39 | 2  | 14 | 14 | 32 | 1.00 | 1.06 | 1.11 | 1.11 | 1.22 | 0.84 | 0.88 | 0.85 | 0.91 | 0.92 | 0.98 | 0.96 | 1.01 | 66.07  | 9.11 |
| Q811S7 | Upstream-binding protein 1 OS=Mus musculus GN=Ubp1<br>PE=1 SV=1 -<br>[UBIP1_MOUSE]                            | 7.22  | 2  | 3  | 3  | 7  | 1.00 | 0.92 | 0.91 | 0.99 | 1.08 | 0.99 | 0.94 | 0.85 | 0.92 | 0.96 | 1.00 | 1.00 | 1.00 | 60.17  | 6.27 |
| Q61563 | Fibroblast growth factor receptor<br>OS=Mus musculus<br>GN=Fgfr3 PE=2 SV=2<br>- [Q61563_MOUSE]                | 2.43  | 55 | 1  | 2  | 6  | 0.93 | 1.18 | 1.27 | 0.95 | 1.02 | 0.96 | 1.03 | 0.85 | 0.91 | 0.99 | 1.07 | 0.87 | 0.94 | 85.82  | 6.92 |
| Q99L43 | Phosphatidate cytidyltransferase 2<br>OS=Mus musculus<br>GN=Cds2 PE=1 SV=1<br>[CDS2_MOUSE]                    | 18.47 | 4  | 5  | 5  | 16 | 1.01 | 0.99 | 0.93 | 1.14 | 1.02 | 0.83 | 0.84 | 0.85 | 0.81 | 0.91 | 0.86 | 0.88 | 0.85 | 51.28  | 7.05 |
| Q7TMQ7 | WD repeat-containing protein 91 OS=Mus musculus GN=Wdr91<br>PE=1 SV=1 -<br>[WDR91_MOUSE]                      | 4.81  | 1  | 3  | 3  | 5  | 0.96 | 0.82 | 0.77 | 0.90 | 0.94 | 0.86 | 0.90 | 0.85 | 0.88 | 0.87 | 0.91 | 0.88 | 0.85 | 83.37  | 6.64 |
| Q4KUS2 | Protein unc-13 homolog A OS=Mus musculus GN=Unc13a<br>PE=1 SV=3 -<br>[UN13A_MOUSE]                            | 10.98 | 9  | 14 | 14 | 27 | 0.98 | 1.17 | 1.11 | 1.02 | 1.09 | 0.91 | 0.94 | 0.85 | 0.88 | 0.94 | 0.94 | 1.01 | 1.04 | 193.66 | 5.25 |
| Q80XN0 | D-beta-hydroxybutyrate dehydrogenase, mitochondrial OS=Mus musculus GN=Bdh1<br>PE=1 SV=2 -<br>[BDH_MOUSE]     | 37.90 | 2  | 12 | 12 | 26 | 0.89 | 0.99 | 1.12 | 1.06 | 1.17 | 0.93 | 1.04 | 0.85 | 0.99 | 0.98 | 1.11 | 0.99 | 1.14 | 38.27  | 9.01 |
| Q8K0P3 | TLD domain-containing protein 1 OS=Mus musculus<br>GN=Tldc1 PE=2 SV=1<br>- [TLDC1_MOUSE]                      | 3.52  | 1  | 1  | 1  | 1  | 1.24 | 1.02 | 0.82 | 1.30 | 1.05 | 1.02 | 0.82 | 0.85 | 0.68 | 1.01 | 0.81 | 1.18 | 0.95 | 50.81  | 6.52 |
| P10833 | Ras-related protein R-Ras OS=Mus musculus GN=Rras<br>PE=2 SV=1 -<br>[RRAS_MOUSE]                              | 23.85 | 1  | 2  | 4  | 8  | 1.14 | 1.25 | 1.09 | 0.93 | 0.81 | 0.93 | 0.81 | 0.85 | 0.74 | 0.96 | 0.84 | 1.05 | 0.92 | 23.75  | 6.79 |
| Q3UHB1 | 5'-nucleotidase domain-containing protein 3 OS=Mus musculus<br>GN=Nt5dc3 PE=2<br>SV=1 -<br>[NTSD3_MOUSE]      | 27.66 | 1  | 12 | 12 | 34 | 1.07 | 1.03 | 0.98 | 1.05 | 1.01 | 0.94 | 0.88 | 0.85 | 0.79 | 0.92 | 0.85 | 1.00 | 0.90 | 63.13  | 8.56 |
| Q8JZQ9 | Eukaryotic translation initiation factor 3 subunit B OS=Mus musculus GN=Elf3b<br>PE=1 SV=1 -<br>[EIF3B_MOUSE] | 40.97 | 1  | 22 | 22 | 66 | 1.04 | 0.97 | 0.96 | 0.99 | 0.96 | 0.92 | 0.86 | 0.85 | 0.85 | 0.88 | 0.83 | 0.87 | 0.83 | 91.31  | 5.02 |



|         |                                                                                                      |       |    |    |    |     |      |      |      |      |      |      |      |      |      |      |      |      |      |        |      |
|---------|------------------------------------------------------------------------------------------------------|-------|----|----|----|-----|------|------|------|------|------|------|------|------|------|------|------|------|------|--------|------|
| P55772  | Ectonucleoside triphosphate diphosphohydrolase 1 OS=Mus musculus GN=Entpd1 PE=2 SV=1 - [ENTP1_MOUSE] | 5.88  | 5  | 2  | 2  | 6   | 0.99 | 0.80 | 0.95 | 1.19 | 1.23 | 1.21 | 0.91 | 0.85 | 1.01 | 1.11 | 1.33 | 1.04 | 1.11 | 57.17  | 5.86 |
| O35405  | Phospholipase D3 OS=Mus musculus GN=Pld3 PE=2 SV=1 - [PLD3_MOUSE]                                    | 20.70 | 1  | 7  | 7  | 11  | 0.89 | 1.05 | 1.08 | 1.04 | 1.03 | 0.99 | 0.99 | 0.85 | 0.79 | 0.76 | 0.85 | 0.85 | 0.93 | 54.35  | 6.52 |
| Q3U1V6- | Isoform 2 of Ubiquitin-conjugating enzyme E2 variant 3 OS=Mus musculus GN=Uevld - [UEVLD_MOUSE]      | 4.40  | 2  | 1  | 1  | 2   | 0.86 | 1.07 | 1.24 | 1.00 | 1.16 | 0.83 | 0.96 | 0.85 | 0.98 | 0.99 | 1.15 | 1.01 | 1.18 | 28.06  | 6.80 |
| P19096  | Fatty acid synthase OS=Mus musculus GN=Fasn PE=1 SV=2 - [FAS_MOUSE]                                  | 21.88 | 1  | 42 | 42 | 126 | 1.00 | 1.04 | 0.93 | 1.09 | 1.07 | 0.90 | 0.89 | 0.85 | 0.86 | 0.92 | 0.92 | 0.99 | 1.01 | 272.26 | 6.58 |
| Q9J1M4  | 5'(3')-deoxyribonucleotidase, cytosolic type OS=Mus musculus GN=Nt5c PE=1 SV=1 - [NT5C_MOUSE]        | 43.00 | 1  | 1  | 6  | 21  | 0.96 | 1.05 | 1.08 | 0.76 | 0.79 | 0.85 | 0.88 | 0.85 | 0.87 | 0.81 | 0.84 | 1.07 | 1.11 | 23.06  | 5.49 |
| Q01341  | Adenylate cyclase type 6 OS=Mus musculus GN=Adcy6 PE=1 SV=1 - [ADCY6_MOUSE]                          | 3.69  | 2  | 2  | 3  | 5   | 0.92 | 1.07 | 1.16 | 1.09 | 1.18 | 0.79 | 0.86 | 0.85 | 0.92 | 0.98 | 1.07 | 0.83 | 0.90 | 130.23 | 7.87 |
| P63318  | Protein kinase C gamma type OS=Mus musculus GN=Prkcg PE=1 SV=1 - [KPCG_MOUSE]                        | 50.65 | 2  | 22 | 25 | 90  | 1.05 | 1.06 | 1.10 | 1.06 | 1.01 | 0.90 | 0.87 | 0.85 | 0.87 | 0.96 | 0.93 | 1.15 | 1.08 | 78.31  | 7.46 |
| Q9DBL7  | Bifunctional coenzyme A synthase OS=Mus musculus GN=Coasy PE=1 SV=2 - [COASY_MOUSE]                  | 4.09  | 1  | 1  | 1  | 2   | 1.00 | 0.77 | 0.77 | 0.87 | 0.87 | 0.71 | 0.71 | 0.85 | 0.84 | 0.99 | 0.99 | 0.97 | 0.98 | 61.98  | 7.11 |
| P63011  | Ras-related protein Rab3A OS=Mus musculus GN=Rab3a PE=1 SV=1 - [RAB3A_MOUSE]                         | 62.73 | 14 | 5  | 14 | 212 | 0.98 | 0.86 | 0.87 | 1.05 | 1.06 | 0.91 | 0.94 | 0.85 | 0.88 | 0.85 | 0.87 | 0.89 | 0.92 | 24.95  | 5.03 |
| Q3KNM2  | E3 ubiquitin-protein ligase MARCH5 OS=Mus musculus GN=March5 PE=2 SV=1 - [MARH5_MOUSE]               | 7.55  | 2  | 2  | 2  | 7   | 1.07 | 1.16 | 1.05 | 1.08 | 0.99 | 0.74 | 0.75 | 0.85 | 0.77 | 0.87 | 0.85 | 1.01 | 0.95 | 31.21  | 8.70 |
| Q7TMB8  | Cytoplasmic FMR1-interacting protein 1 OS=Mus musculus GN=Cyfp1 PE=1 SV=1 - [CYFP1_MOUSE]            | 13.89 | 4  | 5  | 14 | 31  | 0.94 | 1.15 | 1.09 | 1.18 | 1.26 | 0.85 | 0.89 | 0.85 | 0.81 | 0.95 | 1.01 | 1.03 | 1.09 | 145.15 | 6.90 |
| Q91VC3  | Eukaryotic initiation factor 4A-III OS=Mus musculus GN=EIF4a3 PE=2 SV=3 - [IF4A3_MOUSE]              | 27.74 | 3  | 8  | 11 | 42  | 0.92 | 0.85 | 0.92 | 0.95 | 1.07 | 0.82 | 0.91 | 0.85 | 0.91 | 0.85 | 0.99 | 0.82 | 0.91 | 46.81  | 6.73 |

|        |                                                                                                                                     |       |    |    |    |     |      |      |      |      |      |      |      |      |      |      |      |      |      |        |      |
|--------|-------------------------------------------------------------------------------------------------------------------------------------|-------|----|----|----|-----|------|------|------|------|------|------|------|------|------|------|------|------|------|--------|------|
| Q6TEK5 | Vitamin K epoxide reductase complex subunit 1-like protein 1<br>OS=Mus musculus<br>GN=Vkorc111 PE=2<br>SV=1 -<br>[VKORL_MOUSE]      | 10.80 | 2  | 2  | 2  | 3   | 1.33 | 1.10 | 0.82 | 1.22 | 0.92 | 0.92 | 0.69 | 0.85 | 0.64 | 1.02 | 0.77 | 1.12 | 0.84 | 19.77  | 8.95 |
| O89114 | DnaJ homolog subfamily B member 5<br>OS=Mus musculus<br>GN=Dnajb5 PE=2<br>SV=1 -<br>[DNJB5_MOUSE]                                   | 12.93 | 2  | 2  | 2  | 5   | 1.07 | 1.25 | 1.04 | 0.96 | 0.86 | 1.78 | 1.53 | 0.85 | 0.79 | 1.01 | 0.93 | 0.86 | 0.76 | 39.10  | 9.04 |
| Q3TYH2 | Ras-related protein Rab15<br>OS=Mus musculus<br>GN=Rab15 PE=2<br>SV=1 -<br>[Q3TYH2_MOUSE]                                           | 25.94 | 15 | 3  | 5  | 53  | 1.12 | 2.15 | 1.84 | 1.21 | 1.11 | 1.02 | 0.87 | 0.85 | 0.70 | 0.84 | 0.75 | 1.12 | 0.93 | 24.32  | 5.71 |
| A2AMW0 | Capping protein (Actin filament) muscle Z-line, beta, isoform CRA_a<br>OS=Mus musculus<br>GN=Capzb PE=4<br>SV=1 -<br>[A2AMW0_MOUSE] | 61.92 | 6  | 3  | 17 | 127 | 0.97 | 0.88 | 0.88 | 0.99 | 1.02 | 1.03 | 1.00 | 0.85 | 0.87 | 0.93 | 0.94 | 0.96 | 0.99 | 29.28  | 6.92 |
| Q8R2Y0 | Isoform 2 of Monoacylglycerol lipase ABHD6<br>OS=Mus musculus<br>GN=Abhd6 -<br>[ABHD6_MOUSE]                                        | 14.88 | 2  | 3  | 3  | 7   | 0.93 | 0.88 | 0.93 | 1.10 | 1.27 | 0.84 | 0.87 | 0.85 | 0.90 | 0.89 | 0.98 | 0.89 | 1.00 | 32.77  | 8.34 |
| Q9R0X4 | Acyl-coenzyme A thioesterase 9, mitochondrial<br>OS=Mus musculus<br>GN=Aco9 PE=1<br>SV=1 -<br>[ACOT9_MOUSE]                         | 20.05 | 2  | 7  | 7  | 15  | 0.96 | 1.14 | 1.07 | 1.01 | 1.04 | 0.92 | 0.91 | 0.85 | 0.87 | 0.91 | 0.97 | 1.02 | 1.00 | 50.53  | 8.59 |
| Q9Z0J0 | Epididymal secretory protein E1<br>OS=Mus musculus<br>GN=Npc2 PE=2<br>SV=1 -<br>[NPC2_MOUSE]                                        | 28.19 | 1  | 4  | 4  | 10  | 0.93 | 0.65 | 0.77 | 0.90 | 1.02 | 0.83 | 0.92 | 0.85 | 1.03 | 0.77 | 0.88 | 0.70 | 0.78 | 16.43  | 7.68 |
| Q9DBG3 | AP-2 complex subunit beta<br>OS=Mus musculus<br>GN=Ap2b1 PE=1<br>SV=1 -<br>[AP2B1_MOUSE]                                            | 51.87 | 6  | 22 | 44 | 197 | 0.95 | 0.95 | 1.02 | 1.10 | 1.10 | 0.92 | 0.94 | 0.85 | 0.90 | 0.91 | 0.96 | 0.96 | 0.99 | 104.52 | 5.38 |
| Q68FD5 | Clathrin heavy chain 1<br>OS=Mus musculus<br>GN=Cltc PE=1<br>SV=3 -<br>[CLH1_MOUSE]                                                 | 67.76 | 3  | 95 | 95 | 830 | 0.96 | 1.08 | 1.12 | 1.16 | 1.21 | 0.85 | 0.87 | 0.85 | 0.88 | 0.92 | 0.98 | 1.00 | 1.02 | 191.43 | 5.69 |
| O54829 | Regulator of G-protein signaling 7<br>OS=Mus musculus<br>GN=Rgs7 PE=1<br>SV=2 -<br>[RGS7_MOUSE]                                     | 35.18 | 1  | 10 | 13 | 38  | 0.85 | 0.87 | 1.06 | 1.02 | 1.13 | 0.91 | 1.06 | 0.85 | 1.00 | 0.85 | 0.99 | 0.85 | 0.97 | 54.76  | 8.13 |
| Q9QYB5 | Gamma-adducin<br>OS=Mus musculus<br>GN=Add3 PE=1<br>SV=2 -<br>[ADDG_MOUSE]                                                          | 34.70 | 1  | 1  | 19 | 172 | 1.13 | 0.93 | 0.83 | 0.95 | 0.82 | 0.89 | 0.81 | 0.85 | 0.77 | 0.78 | 0.71 | 0.84 | 0.81 | 78.73  | 5.95 |
| Q9D5V5 | Cullin-5<br>OS=Mus musculus<br>GN=Cul5 PE=1<br>SV=3 -<br>[CUL5_MOUSE]                                                               | 19.49 | 4  | 14 | 14 | 28  | 1.02 | 0.99 | 0.93 | 1.11 | 1.07 | 0.97 | 0.87 | 0.85 | 0.86 | 0.91 | 0.91 | 1.08 | 1.05 | 90.92  | 7.81 |

|          |                                                                                                                  |       |    |    |    |     |      |      |      |      |      |      |      |      |      |      |      |      |      |        |      |
|----------|------------------------------------------------------------------------------------------------------------------|-------|----|----|----|-----|------|------|------|------|------|------|------|------|------|------|------|------|------|--------|------|
| Q3UNZ8   | Quinone oxidoreductase-like protein 2 OS=Mus musculus PE=2 SV=1 - [QORL2_MOUSE]                                  | 4.00  | 1  | 1  | 1  | 4   | 1.25 | 1.06 | 0.84 | 1.12 | 0.90 | 0.96 | 0.76 | 0.85 | 0.67 | 0.97 | 0.78 | 1.07 | 0.85 | 37.78  | 8.90 |
| Q9EQQ9   | Bifunctional protein NCOAT OS=Mus musculus GN=Mgea5 PE=1 SV=2 - [NCOAT_MOUSE]                                    | 12.99 | 3  | 9  | 9  | 15  | 0.98 | 1.09 | 1.03 | 1.06 | 1.11 | 0.94 | 0.96 | 0.85 | 0.88 | 0.94 | 0.95 | 0.83 | 0.93 | 103.10 | 4.92 |
| G3UVV4   | Hexokinase 1, isoform CRA_f OS=Mus musculus GN=Hk1 PE=3 SV=1 - [G3UVV4_MOUSE]                                    | 47.98 | 15 | 42 | 42 | 338 | 0.95 | 0.96 | 1.02 | 1.06 | 1.12 | 0.89 | 0.95 | 0.85 | 0.89 | 0.92 | 0.98 | 0.97 | 1.04 | 101.81 | 6.67 |
| P47743   | Metabotropic glutamate receptor 8 OS=Mus musculus GN=Grm8 PE=1 SV=2 - [GRM8_MOUSE]                               | 0.99  | 2  | 1  | 1  | 2   | 0.83 | 1.25 | 1.51 | 1.03 | 1.25 | 0.82 | 0.99 | 0.85 | 1.02 | 0.93 | 1.13 | 0.94 | 1.14 | 101.76 | 8.15 |
| P70404   | Isocitrate dehydrogenase [NAD] subunit gamma 1, mitochondrial OS=Mus musculus GN=Idh3g PE=1 SV=1 - [IDHG1_MOUSE] | 34.61 | 1  | 11 | 11 | 42  | 0.97 | 0.97 | 0.96 | 1.16 | 1.13 | 0.85 | 0.94 | 0.85 | 0.89 | 0.91 | 1.01 | 1.05 | 1.06 | 42.76  | 9.01 |
| Q7TPV4   | Myb-binding protein 1A OS=Mus musculus GN=Mybbp1a PE=1 SV=2 - [MBB1A_MOUSE]                                      | 3.20  | 1  | 3  | 3  | 5   | 0.87 | 0.81 | 0.97 | 1.04 | 1.14 | 0.83 | 0.93 | 0.85 | 0.83 | 0.83 | 0.91 | 0.96 | 1.01 | 151.94 | 8.95 |
| Q921E6-3 | Isoform 3 of Polycomb protein EED OS=Mus musculus GN=Eed - [EED_MOUSE]                                           | 2.34  | 3  | 1  | 1  | 1   | 1.13 | 1.31 | 1.15 | 1.06 | 0.93 | 0.92 | 0.81 | 0.85 | 0.75 | 1.07 | 0.94 | 0.98 | 0.86 | 48.73  | 7.31 |
| Q9D1E8   | 1-acyl-sn-glycerol-3-phosphate acyltransferase epsilon OS=Mus musculus GN=Agpat5 PE=2 SV=2 - [PLCE_MOUSE]        | 6.85  | 2  | 2  | 2  | 4   | 1.00 | 1.30 | 1.30 | 1.16 | 1.16 | 0.74 | 0.74 | 0.85 | 0.85 | 0.94 | 0.94 | 1.01 | 1.01 | 42.18  | 9.38 |
| Q9DD03   | Ras-related protein Rab13 OS=Mus musculus GN=Rab13 PE=1 SV=1 - [RAB13_MOUSE]                                     | 14.85 | 1  | 1  | 3  | 14  | 1.15 | 1.22 | 1.06 | 1.16 | 1.00 | 0.93 | 0.80 | 0.85 | 0.73 | 0.94 | 0.82 | 1.14 | 0.99 | 22.76  | 9.50 |
| Q9D273   | Cob(II)ynic acid a,c-diamide adenosyltransferase, mitochondrial OS=Mus musculus GN=Mmab PE=2 SV=1 - [MMAB_MOUSE] | 31.65 | 3  | 6  | 6  | 19  | 0.92 | 0.85 | 0.87 | 0.91 | 0.96 | 0.87 | 0.93 | 0.85 | 0.90 | 0.96 | 0.94 | 0.87 | 0.91 | 26.26  | 9.20 |
| A2AKD7   | Alpha-1-syntrophin OS=Mus musculus GN=Snta1 PE=2 SV=1 - [A2AKD7_MOUSE]                                           | 23.05 | 2  | 7  | 7  | 11  | 0.99 | 0.96 | 1.04 | 0.91 | 0.91 | 1.00 | 0.94 | 0.85 | 0.88 | 0.94 | 0.96 | 0.96 | 1.11 | 53.25  | 6.80 |

|          |                                                                                                                                |       |    |    |    |    |      |      |      |      |      |       |       |      |      |      |      |      |      |        |      |
|----------|--------------------------------------------------------------------------------------------------------------------------------|-------|----|----|----|----|------|------|------|------|------|-------|-------|------|------|------|------|------|------|--------|------|
| Q9DB34   | Charged multivesicular body protein 2a<br>OS=Mus musculus<br>GN=Chmp2a PE=1<br>SV=1 -<br>[CHM2A_MOUSE]                         | 22.52 | 1  | 5  | 5  | 14 | 0.99 | 0.90 | 1.01 | 0.90 | 0.92 | 0.82  | 0.81  | 0.85 | 0.83 | 0.80 | 0.79 | 0.85 | 0.84 | 25.12  | 5.97 |
| F6RL36   | Troponin T, fast skeletal muscle (Fragment)<br>OS=Mus musculus<br>GN=Tant3 PE=2<br>SV=1 -<br>[F6RL36_MOUSE]                    | 35.05 | 33 | 5  | 5  | 16 | 0.72 | 0.84 | 0.94 | 0.68 | 0.85 | 16.91 | 20.90 | 0.85 | 1.20 | 1.02 | 1.58 | 0.82 | 1.23 | 25.66  | 8.12 |
| G3UWE1   | MCG11048, isoform CRA_c<br>OS=Mus musculus<br>GN=Teccr PE=4<br>SV=1 -<br>[G3UWE1_MOUSE]                                        | 16.38 | 3  | 5  | 5  | 16 | 1.11 | 0.97 | 0.84 | 1.11 | 1.00 | 0.82  | 0.73  | 0.85 | 0.76 | 0.90 | 0.82 | 1.01 | 1.00 | 34.22  | 9.47 |
| Q8K3A9   | 7SK snRNA methylphosphate capping enzyme<br>OS=Mus musculus<br>GN=Mepce PE=1<br>SV=2 -<br>[MEPCE_MOUSE]                        | 12.01 | 1  | 3  | 3  | 4  | 0.90 | 1.33 | 1.47 | 0.98 | 1.09 | 0.92  | 1.02  | 0.85 | 0.94 | 0.92 | 1.02 | 1.05 | 1.16 | 72.01  | 9.25 |
| O54833   | Casein kinase II subunit alpha'<br>OS=Mus musculus<br>GN=Csnk2a2 PE=2<br>SV=1 -<br>[CSK22_MOUSE]                               | 36.86 | 1  | 10 | 10 | 21 | 1.04 | 0.92 | 1.03 | 0.99 | 1.04 | 0.89  | 0.97  | 0.85 | 1.06 | 0.86 | 0.93 | 0.88 | 0.87 | 41.19  | 8.56 |
| O09114-2 | Isoform 2 of Prostaglandin-H2 D-isomerase<br>OS=Mus musculus<br>GN=Ptgds -<br>[PTGDS_MOUSE]                                    | 20.63 | 2  | 2  | 2  | 10 | 1.23 | 0.74 | 0.60 | 1.01 | 0.90 | 0.74  | 0.67  | 0.85 | 0.72 | 0.71 | 0.66 | 0.85 | 0.72 | 13.93  | 6.77 |
| Q6PAR5-  | Isoform 5 of GTPase-activating protein and VPS9 domain-containing protein 1<br>OS=Mus musculus<br>GN=Gapvd1 -<br>[GAPD1_MOUSE] | 4.53  | 12 | 5  | 5  | 12 | 0.89 | 1.11 | 1.26 | 1.03 | 1.17 | 0.89  | 0.95  | 0.85 | 0.98 | 0.93 | 1.07 | 1.00 | 1.16 | 159.88 | 5.20 |
| E9PZJ3   | Protein 4933411K20Rik (Fragment)<br>OS=Mus musculus<br>GN=4933411K20Rik PE=2<br>SV=1 -<br>[E9PZJ3_MOUSE]                       | 6.34  | 4  | 1  | 1  | 2  | 1.14 | 0.74 | 0.64 | 0.91 | 0.80 | 1.17  | 1.01  | 0.85 | 0.74 | 0.83 | 0.73 | 0.96 | 0.84 | 22.91  | 6.27 |
| E9Q357   | Protein Gm17673<br>OS=Mus musculus<br>GN=Gm17673 PE=4<br>SV=2 -<br>[E9Q357_MOUSE]                                              | 2.20  | 1  | 2  | 2  | 3  | 1.81 | 0.95 | 0.52 | 0.99 | 0.55 | 1.04  | 0.57  | 0.85 | 0.47 | 1.12 | 0.62 | 1.13 | 0.63 | 109.61 | 9.16 |
| Q9QY93   | dCTP pyrophosphatase 1<br>OS=Mus musculus<br>GN=Dctpp1 PE=1<br>SV=1 -<br>[DCTP1_MOUSE]                                         | 11.18 | 1  | 1  | 1  | 2  | 1.12 | 1.67 | 1.49 | 1.23 | 1.11 | 0.92  | 0.82  | 0.85 | 0.76 | 0.68 | 0.61 | 0.73 | 0.66 | 18.78  | 5.03 |
| Q7TNC9   | Inpp5a protein<br>OS=Mus musculus<br>GN=Inpp5a PE=2<br>SV=1 -<br>[Q7TNC9_MOUSE]                                                | 9.71  | 3  | 4  | 4  | 7  | 1.19 | 0.97 | 0.84 | 1.00 | 0.91 | 0.85  | 0.82  | 0.85 | 0.78 | 0.91 | 0.82 | 0.91 | 0.83 | 47.59  | 6.92 |

|          |                                                                                                        |       |    |    |    |     |      |      |      |      |      |      |      |      |      |      |      |      |      |        |       |
|----------|--------------------------------------------------------------------------------------------------------|-------|----|----|----|-----|------|------|------|------|------|------|------|------|------|------|------|------|------|--------|-------|
| Q9CR57   | 60S ribosomal protein L14 OS=Mus musculus GN=Rpl14 PE=2 SV=3 - [RL14_MOUSE]                            | 11.52 | 1  | 2  | 2  | 5   | 0.98 | 1.21 | 1.00 | 1.01 | 1.03 | 0.85 | 0.81 | 0.85 | 0.91 | 0.93 | 0.97 | 1.14 | 1.16 | 23.55  | 11.02 |
| Q8BGR2   | Leucine-rich repeat-containing protein 8D OS=Mus musculus GN=Lrrc8d PE=2 SV=1 - [LRC8D_MOUSE]          | 1.86  | 1  | 1  | 1  | 1   | 1.02 | 1.27 | 1.25 | 1.06 | 1.04 | 0.72 | 0.70 | 0.85 | 0.83 | 0.85 | 0.83 | 0.92 | 0.90 | 98.05  | 7.44  |
| E9PVZ0   | GTP-binding protein REM 2 OS=Mus musculus GN=Rem2 PE=2 SV=1 - [E9PVZ0_MOUSE]                           | 10.00 | 3  | 1  | 1  | 2   | 0.93 | 0.78 | 0.84 | 1.36 | 1.47 | 1.16 | 1.24 | 0.85 | 0.92 | 1.46 | 1.58 | 1.64 | 1.78 | 18.95  | 6.10  |
| Q9JLV5   | Cullin-3 OS=Mus musculus GN=Cul3 PE=1 SV=1 - [CUL3_MOUSE]                                              | 27.08 | 10 | 17 | 18 | 33  | 0.99 | 0.89 | 0.88 | 1.09 | 1.10 | 0.87 | 0.88 | 0.85 | 0.81 | 0.90 | 0.88 | 0.95 | 0.95 | 88.89  | 8.46  |
| E9Q1L5   | Sentrin-specific protease 7 OS=Mus musculus GN=Senp7 PE=2 SV=1 - [E9Q1L5_MOUSE]                        | 0.79  | 2  | 1  | 1  | 1   | 0.89 | 0.94 | 1.05 | 0.89 | 0.99 | 0.89 | 0.99 | 0.85 | 0.95 | 0.85 | 0.95 | 0.80 | 0.90 | 113.29 | 6.47  |
| Q9WVK8   | Cholesterol 24-hydroxylase OS=Mus musculus GN=Cyp46a1 PE=2 SV=1 - [CP46A_MOUSE]                        | 22.60 | 1  | 10 | 10 | 23  | 0.96 | 1.02 | 1.02 | 1.09 | 1.06 | 0.87 | 0.84 | 0.85 | 0.87 | 0.92 | 0.97 | 0.89 | 0.91 | 56.78  | 8.82  |
| Q80X68   | Citrate synthase OS=Mus musculus GN=Cst PE=1 SV=1 - [Q80X68_MOUSE]                                     | 25.54 | 1  | 1  | 10 | 76  | 1.21 | 1.10 | 0.91 | 1.01 | 0.83 | 0.91 | 0.75 | 0.85 | 0.70 | 0.94 | 0.78 | 1.28 | 1.06 | 52.29  | 8.79  |
| Q923L3-2 | Isoform 2 of CUB and sushi domain-containing protein 1 OS=Mus musculus GN=Csmd1 - [CSMD1_MOUSE]        | 0.68  | 2  | 1  | 2  | 4   | 0.95 | 0.97 | 1.02 | 1.01 | 1.06 | 0.81 | 0.85 | 0.85 | 0.90 | 0.86 | 0.91 | 1.14 | 1.21 | 386.00 | 6.09  |
| Q55W88   | Ras-related protein Rab1A OS=Mus musculus GN=Rab1 PE=2 SV=1 - [Q55W88_MOUSE]                           | 72.28 | 13 | 7  | 13 | 183 | 1.03 | 0.97 | 1.00 | 1.00 | 0.96 | 0.90 | 0.90 | 0.85 | 0.88 | 0.85 | 0.95 | 0.94 | 0.99 | 22.36  | 6.21  |
| Q9WUP7   | Isoform 2 of Ubiquitin carboxyl-terminal hydrolase isozyme L5 OS=Mus musculus GN=Uchl5 - [UCHL5_MOUSE] | 40.85 | 2  | 8  | 8  | 16  | 0.97 | 0.99 | 0.97 | 0.97 | 1.00 | 0.94 | 0.90 | 0.85 | 0.89 | 0.96 | 0.96 | 0.88 | 0.92 | 37.46  | 5.40  |
| O35295   | Transcriptional activator protein Pur-beta OS=Mus musculus GN=Purb PE=1 SV=3 - [PURB_MOUSE]            | 49.38 | 1  | 9  | 13 | 49  | 0.96 | 1.02 | 1.05 | 0.89 | 0.97 | 0.88 | 0.89 | 0.85 | 0.90 | 0.78 | 0.81 | 0.76 | 0.85 | 33.88  | 5.43  |
| P62823   | Ras-related protein Rab3C OS=Mus musculus GN=Rab3c PE=1 SV=1 - [RAB3C_MOUSE]                           | 66.08 | 11 | 7  | 15 | 107 | 1.09 | 1.00 | 0.89 | 1.10 | 0.98 | 0.95 | 0.84 | 0.85 | 0.74 | 1.00 | 0.88 | 1.06 | 0.95 | 25.86  | 5.24  |

|          |                                                                                                                              |       |   |    |    |     |      |      |      |      |      |      |      |      |      |      |      |      |      |        |       |
|----------|------------------------------------------------------------------------------------------------------------------------------|-------|---|----|----|-----|------|------|------|------|------|------|------|------|------|------|------|------|------|--------|-------|
| Q9QZN4   | F-box only protein 6<br>OS=Mus musculus<br>GN=Fbxo6 PE=1<br>SV=1 -<br>[FBX6_MOUSE]                                           | 3.73  | 1 | 1  | 1  | 2   | 0.93 | 1.38 | 1.49 | 1.14 | 1.23 | 1.00 | 1.07 | 0.85 | 0.91 | 1.06 | 1.14 | 0.93 | 1.00 | 34.47  | 8.18  |
| Q8VHE0   | Translocation protein<br>SEC63 homolog<br>OS=Mus musculus<br>GN=Sec63 PE=1<br>SV=4 -<br>[SEC63_MOUSE]                        | 7.24  | 1 | 4  | 4  | 5   | 1.00 | 1.13 | 1.13 | 1.02 | 1.02 | 0.97 | 0.98 | 0.85 | 0.85 | 0.94 | 0.92 | 0.96 | 0.97 | 87.81  | 5.38  |
| Q6NVE8   | WD repeat-containing<br>protein 44 OS=Mus<br>musculus GN=Wdr44<br>PE=1 SV=1 -<br>[WDR44_MOUSE]                               | 38.58 | 2 | 25 | 25 | 66  | 0.91 | 0.86 | 0.91 | 0.88 | 0.96 | 0.83 | 0.88 | 0.85 | 0.92 | 0.78 | 0.81 | 0.76 | 0.82 | 101.49 | 5.24  |
| B1AWJ4   | Transmembrane<br>protein 8B OS=Mus<br>musculus<br>GN=Tmem8b PE=2<br>SV=1 -<br>[B1AWJ4_MOUSE]                                 | 1.12  | 1 | 1  | 1  | 2   | 1.13 | 1.00 | 0.89 | 1.07 | 0.95 | 0.75 | 0.67 | 0.85 | 0.75 | 0.89 | 0.79 | 0.91 | 0.81 | 98.03  | 8.91  |
| Q80XK6   | Autophagy-related<br>protein 2 homolog B<br>OS=Mus musculus<br>GN=Atg2b PE=1<br>SV=3 -<br>[ATG2B_MOUSE]                      | 2.65  | 3 | 3  | 3  | 5   | 0.96 | 1.08 | 1.11 | 0.88 | 0.91 | 0.96 | 0.99 | 0.85 | 0.88 | 0.97 | 1.01 | 1.03 | 1.07 | 231.25 | 5.88  |
| Q9WUA2   | Phenylalanine-tRNA<br>ligase beta subunit<br>OS=Mus musculus<br>GN=Farsb PE=2 SV=2<br>- [SYFB_MOUSE]                         | 21.22 | 1 | 11 | 11 | 20  | 0.99 | 0.84 | 0.82 | 1.05 | 1.02 | 0.95 | 0.97 | 0.85 | 0.84 | 0.87 | 0.86 | 1.02 | 1.02 | 65.66  | 7.12  |
| Q60764   | Probable E3 ubiquitin-<br>protein ligase makorin-<br>3 OS=Mus musculus<br>GN=Mkm3 PE=2<br>SV=2 -<br>[MKRN3_MOUSE]            | 1.29  | 1 | 1  | 1  | 2   | 0.79 | 1.22 | 1.53 | 1.18 | 1.48 | 0.90 | 1.13 | 0.85 | 1.07 | 1.01 | 1.27 | 0.78 | 0.99 | 59.40  | 6.64  |
| Q9WUB3   | Glycogen<br>phosphorylase, muscle<br>form OS=Mus<br>musculus GN=Pygm<br>PE=1 SV=3 -<br>[PYGM_MOUSE]                          | 46.91 | 2 | 23 | 35 | 102 | 1.03 | 1.00 | 1.02 | 1.08 | 1.03 | 0.97 | 0.93 | 0.85 | 0.85 | 0.92 | 0.89 | 0.94 | 0.93 | 97.22  | 7.11  |
| P97819-2 | Isoform Short of 85/88<br>kDa calcium-<br>independent<br>phospholipase A2<br>OS=Mus musculus<br>GN=Pla2g6 -<br>[PLPL9_MOUSE] | 3.59  | 5 | 2  | 2  | 4   | 1.01 | 0.96 | 0.96 | 1.11 | 1.11 | 0.97 | 0.95 | 0.85 | 0.87 | 0.95 | 0.98 | 0.93 | 1.01 | 83.65  | 7.18  |
| Q3URE1   | Acyl-CoA synthetase<br>family member 3,<br>mitochondrial OS=Mus<br>musculus GN=Acsf3<br>PE=2 SV=2 -<br>[ACSF3_MOUSE]         | 13.38 | 2 | 5  | 5  | 8   | 0.84 | 0.86 | 1.04 | 1.13 | 1.33 | 0.86 | 0.96 | 0.85 | 1.03 | 0.96 | 1.08 | 0.90 | 1.09 | 65.04  | 8.02  |
| P62754   | 40S ribosomal protein<br>S6 OS=Mus musculus<br>GN=Rps6 PE=1 SV=1<br>[RS6_MOUSE]                                              | 18.88 | 1 | 4  | 4  | 17  | 0.98 | 1.07 | 1.08 | 1.03 | 1.03 | 0.93 | 0.95 | 0.85 | 0.85 | 0.93 | 0.97 | 1.04 | 1.07 | 28.66  | 10.84 |

|         |                                                                                                        |       |   |    |    |    |      |      |      |      |      |      |      |      |      |      |      |      |      |       |       |
|---------|--------------------------------------------------------------------------------------------------------|-------|---|----|----|----|------|------|------|------|------|------|------|------|------|------|------|------|------|-------|-------|
| Q8VEE4  | Replication protein A 70 kDa DNA-binding subunit OS=Mus musculus GN=Rpa1 PE=2 SV=1 - [RFA1_MOUSE]      | 1.93  | 2 | 1  | 1  | 1  | 0.90 | 1.00 | 1.11 | 1.00 | 1.11 | 0.93 | 1.03 | 0.85 | 0.94 | 0.93 | 1.04 | 1.05 | 1.17 | 68.99 | 7.91  |
| E9QAZ2  | Ribosomal protein L15 OS=Mus musculus GN=Gm10020 PE=3 SV=1 - [E9QAZ2_MOUSE]                            | 23.53 | 4 | 4  | 4  | 11 | 0.99 | 0.93 | 0.91 | 1.00 | 1.05 | 0.88 | 0.98 | 0.85 | 0.96 | 0.94 | 1.02 | 0.97 | 0.95 | 24.06 | 11.58 |
| Q9DBF1- | Isoform 2 of Alpha-aminoacidipic semialdehyde dehydrogenase OS=Mus musculus GN=Aldb7a1 - [AL7A1_MOUSE] | 54.99 | 6 | 18 | 18 | 53 | 1.07 | 1.00 | 0.97 | 1.16 | 1.06 | 0.97 | 0.88 | 0.85 | 0.82 | 0.98 | 0.88 | 1.00 | 0.94 | 55.61 | 6.40  |
| Q9CZD3  | Glycine-tRNA ligase OS=Mus musculus GN=Gars PE=1 SV=1 - [SYG_MOUSE]                                    | 32.10 | 1 | 18 | 18 | 54 | 0.97 | 0.91 | 0.95 | 1.09 | 1.14 | 0.91 | 0.96 | 0.85 | 0.90 | 0.93 | 0.96 | 0.90 | 0.93 | 81.83 | 6.65  |
| Q9QZB7  | Actin-related protein 10 OS=Mus musculus GN=Acr10 PE=1 SV=2 - [ARP10_MOUSE]                            | 30.46 | 1 | 7  | 7  | 18 | 1.03 | 0.88 | 0.86 | 1.06 | 1.06 | 0.94 | 0.92 | 0.85 | 0.90 | 0.87 | 0.93 | 1.02 | 0.98 | 46.18 | 7.61  |
| Q9QX11- | Isoform 2 of Cytohesin-1 OS=Mus musculus GN=Cyth1 - [CYH1_MOUSE]                                       | 20.65 | 4 | 3  | 7  | 18 | 0.92 | 0.92 | 1.08 | 0.88 | 1.10 | 0.69 | 0.98 | 0.85 | 0.90 | 0.90 | 1.00 | 0.68 | 0.96 | 46.19 | 5.63  |
| Q9WVT6  | Carbonic anhydrase 14 OS=Mus musculus GN=Ca14 PE=1 SV=1 - [CAH14_MOUSE]                                | 16.91 | 2 | 4  | 4  | 8  | 1.10 | 1.01 | 0.96 | 0.95 | 0.86 | 0.88 | 0.76 | 0.85 | 0.77 | 0.75 | 0.74 | 0.94 | 0.84 | 37.48 | 6.35  |
| P60843  | Eukaryotic initiation factor 4A-1 OS=Mus musculus GN=Eif4a1 PE=2 SV=1 - [IF4A1_MOUSE]                  | 38.92 | 1 | 5  | 14 | 63 | 1.11 | 0.92 | 0.83 | 0.99 | 0.91 | 0.92 | 0.92 | 0.85 | 0.92 | 0.78 | 0.77 | 1.09 | 0.93 | 46.12 | 5.48  |
| Q8CAK1  | Putative transferase CAF17 homolog, mitochondrial OS=Mus musculus GN=lba57 PE=2 SV=1 - [CAF17_MOUSE]   | 10.06 | 2 | 3  | 3  | 6  | 1.01 | 1.03 | 1.18 | 0.94 | 0.89 | 0.85 | 0.82 | 0.85 | 0.80 | 0.89 | 0.95 | 0.89 | 0.93 | 38.38 | 9.01  |
| O55126  | Protein NipSnap homolog 2 OS=Mus musculus GN=Gbas PE=2 SV=1 - [NIPS2_MOUSE]                            | 42.35 | 2 | 9  | 9  | 51 | 0.97 | 1.01 | 1.00 | 1.00 | 1.05 | 0.83 | 0.87 | 0.85 | 0.87 | 0.88 | 0.90 | 0.99 | 1.02 | 32.91 | 9.26  |
| F6YAR3  | Transducin beta-like protein 3 (Fragment) OS=Mus musculus GN=Tb13 PE=4 SV=1 - [F6YAR3_MOUSE]           | 4.35  | 2 | 1  | 1  | 5  | 1.02 | 1.31 | 1.28 | 1.06 | 1.03 | 0.98 | 0.95 | 0.85 | 0.83 | 0.94 | 0.92 | 1.03 | 1.01 | 33.45 | 6.74  |
| Q9DCD0  | 6-phosphogluconate dehydrogenase, decarboxylating OS=Mus musculus GN=Pgd PE=2 SV=3 - [6PGD_MOUSE]      | 25.88 | 1 | 9  | 9  | 23 | 1.11 | 0.98 | 0.88 | 1.22 | 1.10 | 0.98 | 0.86 | 0.85 | 0.78 | 1.03 | 0.93 | 1.07 | 0.99 | 53.21 | 7.23  |

|          |                                                                                                                      |       |    |    |    |     |      |      |      |      |      |      |      |      |      |      |      |      |      |        |      |
|----------|----------------------------------------------------------------------------------------------------------------------|-------|----|----|----|-----|------|------|------|------|------|------|------|------|------|------|------|------|------|--------|------|
| P11881-8 | Isoform 8 of Inositol 1,4,5-trisphosphate receptor type 1<br>OS=Mus musculus<br>GN=Itp1r1 - [ITPR1_MOUSE]            | 17.04 | 14 | 34 | 34 | 68  | 0.91 | 1.03 | 1.16 | 1.20 | 1.32 | 0.87 | 0.94 | 0.85 | 0.97 | 0.94 | 1.05 | 0.98 | 1.11 | 306.67 | 6.29 |
| D3YU17   | Nicalin OS=Mus musculus<br>GN=Ncln<br>PE=2 SV=1 - [D3YU17_MOUSE]                                                     | 16.01 | 3  | 9  | 9  | 17  | 0.98 | 1.20 | 1.25 | 1.12 | 1.14 | 0.89 | 0.83 | 0.85 | 0.90 | 0.95 | 0.93 | 0.94 | 0.92 | 62.74  | 6.49 |
| Q8BG89-2 | Isoform 2 of Protein ZNF365 OS=Mus musculus<br>GN=Znf365 - [ZNF365_MOUSE]                                            | 5.42  | 2  | 2  | 2  | 3   | 1.13 | 1.21 | 1.07 | 1.11 | 0.99 | 0.88 | 0.77 | 0.85 | 0.75 | 0.85 | 0.75 | 0.92 | 0.82 | 38.09  | 6.90 |
| Q8BU31   | Ras-related protein Rap2c OS=Mus musculus<br>GN=Rap2c PE=1 SV=1 - [RAP2C_MOUSE]                                      | 53.55 | 2  | 1  | 7  | 33  | 1.19 | 1.02 | 0.85 | 1.15 | 0.96 | 0.94 | 0.79 | 0.85 | 0.71 | 1.01 | 0.85 | 1.11 | 0.93 | 20.73  | 4.94 |
| Q4VB2D   | Transmembrane anterior posterior transformation protein 1 OS=Mus musculus<br>GN=Tap1 PE=2 SV=2 - [TAPT1_MOUSE]       | 4.61  | 1  | 2  | 2  | 4   | 1.02 | 0.92 | 0.91 | 1.11 | 1.09 | 0.90 | 0.88 | 0.85 | 0.84 | 0.87 | 0.86 | 0.95 | 0.94 | 63.85  | 8.22 |
| P56389   | Cytidine deaminase OS=Mus musculus<br>GN=Cda PE=1 SV=2 - [CDD_MOUSE]                                                 | 20.55 | 1  | 2  | 2  | 3   | 1.39 | 0.92 | 0.66 | 1.00 | 0.72 | 1.01 | 0.73 | 0.85 | 0.61 | 0.96 | 0.69 | 1.14 | 0.83 | 16.12  | 5.58 |
| P0C192   | Leucine-rich repeat-containing protein 4B OS=Mus musculus<br>GN=Lrc4b PE=1 SV=1 - [LRC4B_MOUSE]                      | 11.00 | 3  | 6  | 6  | 11  | 1.02 | 1.01 | 0.99 | 0.97 | 0.96 | 0.90 | 0.89 | 0.85 | 0.83 | 0.91 | 0.87 | 1.01 | 0.96 | 76.11  | 7.24 |
| P52189   | Inward rectifier potassium channel 4 OS=Mus musculus<br>GN=Kcnj4 PE=1 SV=1 - [IRK4_MOUSE]                            | 2.02  | 2  | 1  | 1  | 1   | 1.10 | 0.98 | 0.89 | 1.20 | 1.10 | 0.96 | 0.87 | 0.85 | 0.78 | 0.92 | 0.84 | 0.93 | 0.85 | 49.87  | 6.21 |
| Q8VE38-2 | Isoform 2 of Oxidoreductase NAD-binding domain-containing protein 1 OS=Mus musculus<br>GN=Oxnad1 - [OXND1_MOUSE]     | 9.20  | 2  | 2  | 2  | 3   | 1.00 | 1.02 | 1.02 | 1.04 | 1.05 | 0.81 | 0.80 | 0.85 | 0.85 | 0.87 | 0.87 | 0.94 | 0.94 | 28.15  | 6.79 |
| G3X9V4   | Glutamate receptor ionotropic, NMDA 2B OS=Mus musculus<br>GN=Grin2b PE=4 SV=1 - [G3X9V4_MOUSE]                       | 12.75 | 2  | 16 | 16 | 44  | 1.02 | 1.24 | 1.11 | 1.12 | 1.15 | 0.86 | 0.82 | 0.85 | 0.90 | 0.85 | 0.80 | 0.93 | 0.92 | 165.89 | 6.87 |
| P62874   | Guanine nucleotide-binding protein G(i)(G(s))G(t) subunit beta-1 OS=Mus musculus<br>GN=Gnb1 PE=1 SV=3 - [GBB1_MOUSE] | 52.35 | 4  | 9  | 16 | 189 | 1.01 | 0.96 | 0.97 | 1.04 | 1.08 | 0.88 | 0.88 | 0.85 | 0.89 | 0.89 | 0.91 | 0.93 | 0.98 | 37.35  | 6.00 |



|        |                                                                                                                                                            |       |   |    |    |    |      |      |      |      |      |      |      |      |      |      |      |      |      |        |      |
|--------|------------------------------------------------------------------------------------------------------------------------------------------------------------|-------|---|----|----|----|------|------|------|------|------|------|------|------|------|------|------|------|------|--------|------|
| Q60972 | Histone-binding protein RBBP4<br>OS=Mus musculus<br>GN=Rbbp4 PE=1<br>SV=5 -<br>[RBBP4_MOUSE]                                                               | 18.82 | 1 | 3  | 6  | 19 | 0.99 | 0.82 | 1.00 | 0.85 | 0.95 | 0.75 | 0.89 | 0.86 | 0.91 | 0.72 | 0.82 | 0.71 | 0.77 | 47.63  | 4.89 |
| Q3UVK0 | Endoplasmic reticulum metalloproteinase 1<br>OS=Mus musculus<br>GN=Ermp1 PE=1<br>SV=2 -<br>[ERMP1_MOUSE]                                                   | 2.34  | 4 | 2  | 2  | 3  | 1.02 | 1.02 | 1.00 | 1.07 | 1.04 | 0.89 | 0.87 | 0.86 | 0.83 | 0.93 | 0.91 | 0.91 | 0.90 | 100.08 | 7.49 |
| Q8K339 | DNA/RNA-binding protein KIN17<br>OS=Mus musculus<br>GN=Kin PE=2 SV=1 -<br>[KIN17_MOUSE]                                                                    | 6.39  | 1 | 2  | 2  | 2  | 0.98 | 1.16 | 1.18 | 0.74 | 0.80 | 0.66 | 0.91 | 0.86 | 0.87 | 1.09 | 1.07 | 0.98 | 1.00 | 44.69  | 9.04 |
| Q9CQ06 | 39S ribosomal protein L24, mitochondrial<br>OS=Mus musculus<br>GN=Mrpl24 PE=2<br>SV=1 -<br>[RM24_MOUSE]                                                    | 11.11 | 1 | 2  | 2  | 4  | 0.82 | 1.08 | 1.32 | 0.98 | 1.20 | 0.86 | 1.05 | 0.86 | 1.04 | 0.87 | 1.06 | 0.86 | 1.05 | 24.93  | 9.50 |
| Q03059 | Choline O-acetyltransferase<br>OS=Mus musculus<br>GN=Chat PE=2 SV=2 -<br>[CLAT_MOUSE]                                                                      | 4.52  | 2 | 2  | 2  | 4  | 1.03 | 0.97 | 0.94 | 1.14 | 1.10 | 0.95 | 0.92 | 0.86 | 0.82 | 1.02 | 0.99 | 1.09 | 1.05 | 71.81  | 7.74 |
| Q8HW98 | IgLO family member 5<br>OS=Mus musculus<br>GN=Iglon5 PE=2<br>SV=2 -<br>[IGLO5_MOUSE]                                                                       | 13.69 | 1 | 3  | 3  | 7  | 0.91 | 1.02 | 0.99 | 1.02 | 1.09 | 0.94 | 0.91 | 0.86 | 0.84 | 0.90 | 0.95 | 0.88 | 0.91 | 36.74  | 7.69 |
| E0CXQ1 | High affinity cAMP-specific and IBMX-insensitive 3',5'-cyclic phosphodiesterase 8B (Fragment)<br>OS=Mus musculus<br>GN=Pde8b PE=2 SV=2 -<br>[E0CXQ1_MOUSE] | 9.42  | 9 | 2  | 2  | 4  | 1.02 | 1.31 | 1.28 | 1.17 | 1.15 | 0.69 | 0.67 | 0.86 | 0.84 | 1.07 | 1.05 | 1.04 | 1.02 | 37.17  | 6.43 |
| Q5SYD0 | Unconventional myosin Id<br>OS=Mus musculus<br>GN=Myo1d PE=1<br>SV=1 -<br>[MYO1D_MOUSE]                                                                    | 11.73 | 3 | 10 | 10 | 21 | 0.99 | 0.96 | 1.01 | 1.15 | 1.12 | 0.90 | 0.88 | 0.86 | 0.93 | 0.97 | 1.01 | 1.05 | 0.98 | 116.01 | 9.41 |
| Q9ESJ4 | NCK-interacting protein with SH3 domain<br>OS=Mus musculus<br>GN=Nckipsd PE=2 SV=2 -<br>[SPN90_MOUSE]                                                      | 15.97 | 1 | 10 | 10 | 20 | 0.96 | 0.99 | 1.06 | 1.00 | 1.06 | 0.88 | 0.92 | 0.86 | 0.93 | 0.91 | 0.91 | 0.93 | 0.97 | 78.52  | 6.05 |
| Q8BZN6 | Dedicator of cytokinesis protein 10<br>OS=Mus musculus<br>GN=Dock10 PE=1<br>SV=3 -<br>[DOC10_MOUSE]                                                        | 1.21  | 4 | 2  | 2  | 6  | 1.51 | 1.26 | 1.02 | 1.18 | 0.86 | 0.90 | 0.64 | 0.86 | 0.58 | 1.04 | 0.81 | 1.64 | 1.10 | 245.60 | 7.05 |
| Q8VCT3 | Aminopeptidase B<br>OS=Mus musculus<br>GN=Rnpep PE=2<br>SV=2 -<br>[AMPB_MOUSE]                                                                             | 26.77 | 2 | 12 | 12 | 30 | 1.08 | 1.06 | 0.94 | 1.08 | 1.08 | 0.96 | 0.85 | 0.86 | 0.76 | 0.97 | 0.88 | 1.06 | 0.97 | 72.37  | 5.35 |
| Q9EQK5 | Major vault protein<br>OS=Mus musculus<br>GN=Mvp PE=1 SV=4 -<br>[MVP_MOUSE]                                                                                | 3.48  | 2 | 3  | 3  | 4  | 0.87 | 1.18 | 1.30 | 1.12 | 1.24 | 0.91 | 1.02 | 0.86 | 0.98 | 0.89 | 1.03 | 1.00 | 1.15 | 95.87  | 5.59 |

|        |                                                                                                                   |       |    |    |    |     |      |      |      |      |      |      |      |      |      |      |      |      |      |        |      |
|--------|-------------------------------------------------------------------------------------------------------------------|-------|----|----|----|-----|------|------|------|------|------|------|------|------|------|------|------|------|------|--------|------|
| B1AS29 | Glutamate receptor ionotropic, kainate 3 OS=Mus musculus GN=Crik3 PE=2 SV=1 - [GRIK3_MOUSE]                       | 7.83  | 5  | 5  | 6  | 9   | 0.98 | 0.93 | 0.88 | 1.00 | 1.05 | 0.89 | 0.87 | 0.86 | 0.87 | 0.89 | 0.83 | 0.98 | 0.94 | 103.98 | 7.52 |
| E9Q2C7 | Borealin (Fragment) OS=Mus musculus GN=Cdca8 PE=2 SV=1 - [E9Q2C7_MOUSE]                                           | 10.48 | 4  | 1  | 1  | 2   | 1.48 | 1.07 | 0.72 | 1.14 | 0.77 | 1.09 | 0.74 | 0.86 | 0.58 | 0.91 | 0.61 | 1.10 | 0.74 | 12.10  | 9.70 |
| Q9JHI5 | Isovaleryl-CoA dehydrogenase, mitochondrial OS=Mus musculus GN=Ivd PE=1 SV=1 - [IVD_MOUSE]                        | 24.29 | 1  | 10 | 10 | 30  | 1.05 | 1.02 | 0.93 | 1.09 | 1.06 | 0.90 | 0.87 | 0.86 | 0.82 | 0.94 | 0.99 | 1.03 | 0.99 | 46.30  | 8.29 |
| Q64519 | Syndecan-3 OS=Mus musculus GN=Sdc3 PE=2 SV=2 - [SDC3_MOUSE]                                                       | 3.85  | 1  | 1  | 1  | 1   | 1.47 | 1.19 | 0.81 | 0.94 | 0.64 | 0.96 | 0.65 | 0.86 | 0.58 | 1.01 | 0.69 | 1.17 | 0.80 | 45.97  | 4.59 |
| Q9DC63 | Isoform 3 of F-box only protein 3 OS=Mus musculus GN=Fbxo3 - [FBX3_MOUSE]                                         | 10.00 | 4  | 3  | 3  | 7   | 0.96 | 1.09 | 1.08 | 0.89 | 0.98 | 1.09 | 0.93 | 0.86 | 0.92 | 1.01 | 1.04 | 1.11 | 1.10 | 46.87  | 6.74 |
| P62880 | Guanine nucleotide-binding protein G(I)/G(S)/G(T) subunit beta-2 OS=Mus musculus GN=Gnb2 PE=1 SV=3 - [GGB2_MOUSE] | 59.71 | 6  | 6  | 15 | 130 | 1.04 | 1.02 | 0.93 | 1.03 | 1.02 | 0.92 | 0.87 | 0.86 | 0.86 | 0.93 | 0.87 | 1.01 | 0.98 | 37.31  | 6.00 |
| D3Z315 | Coatamer subunit epsilon (Fragment) OS=Mus musculus GN=Cope PE=2 SV=1 - [D3Z315_MOUSE]                            | 20.26 | 4  | 3  | 3  | 6   | 1.11 | 1.08 | 1.10 | 1.02 | 1.04 | 0.90 | 0.81 | 0.86 | 0.82 | 0.83 | 0.85 | 0.91 | 0.85 | 25.35  | 4.70 |
| P70372 | ELAV-like protein 1 OS=Mus musculus GN=Elav1 PE=1 SV=2 - [ELAV1_MOUSE]                                            | 21.47 | 1  | 6  | 6  | 20  | 0.97 | 1.05 | 1.13 | 0.98 | 1.03 | 0.86 | 0.88 | 0.86 | 0.88 | 0.85 | 0.90 | 0.97 | 1.04 | 36.15  | 9.04 |
| F6U329 | Sodium channel protein type 8 subunit alpha OS=Mus musculus GN=Scn8a PE=3 SV=2 - [F6U329_MOUSE]                   | 7.28  | 14 | 8  | 11 | 22  | 0.93 | 1.00 | 1.04 | 1.16 | 1.26 | 0.84 | 0.90 | 0.86 | 0.93 | 0.91 | 0.98 | 0.87 | 0.90 | 225.02 | 6.30 |
| O35136 | Neural cell adhesion molecule 2 OS=Mus musculus GN=Ncam2 PE=1 SV=1 - [NCAM2_MOUSE]                                | 35.01 | 5  | 24 | 24 | 74  | 1.05 | 0.96 | 0.99 | 1.08 | 1.02 | 0.96 | 0.93 | 0.86 | 0.85 | 0.97 | 0.90 | 1.00 | 0.95 | 93.15  | 6.07 |
| Q8C615 | Cysteine desulfurase, mitochondrial OS=Mus musculus GN=Nfs1 PE=2 SV=1 - [Q8C615_MOUSE]                            | 26.14 | 6  | 10 | 10 | 15  | 1.03 | 1.05 | 0.94 | 1.02 | 0.92 | 0.84 | 0.90 | 0.86 | 0.82 | 0.90 | 0.82 | 0.88 | 0.90 | 50.54  | 8.16 |
| Q9Z2W9 | Glutamate receptor 3 OS=Mus musculus GN=Gria3 PE=1 SV=2 - [GRIA3_MOUSE]                                           | 29.62 | 2  | 19 | 24 | 75  | 0.96 | 1.11 | 1.03 | 1.09 | 1.14 | 0.84 | 0.84 | 0.86 | 0.88 | 0.81 | 0.83 | 0.87 | 0.88 | 100.46 | 8.38 |

|         |                                                                                                                                   |       |    |    |    |    |      |      |      |      |      |      |      |      |      |      |      |      |      |        |       |
|---------|-----------------------------------------------------------------------------------------------------------------------------------|-------|----|----|----|----|------|------|------|------|------|------|------|------|------|------|------|------|------|--------|-------|
| Q8BH04  | Phosphoenolpyruvate carboxykinase [GTP], mitochondrial OS=Mus musculus GN=Pck2 PE=2 SV=1 - [PCKGM_MOUSE]                          | 14.37 | 1  | 7  | 7  | 13 | 0.99 | 1.10 | 1.08 | 1.09 | 1.07 | 0.96 | 0.94 | 0.86 | 0.91 | 1.05 | 1.07 | 1.02 | 1.01 | 70.48  | 7.28  |
| Q99LC3  | NADH dehydrogenase [ubiquinone] 1 alpha subcomplex subunit 10, mitochondrial OS=Mus musculus GN=Ndufa10 PE=1 SV=1 - [NDUAA_MOUSE] | 44.51 | 1  | 16 | 16 | 69 | 0.91 | 0.84 | 0.96 | 1.06 | 1.14 | 0.90 | 1.03 | 0.86 | 0.95 | 0.96 | 1.01 | 0.93 | 1.03 | 40.58  | 7.78  |
| P61028  | Ras-related protein Rab8B OS=Mus musculus GN=Rab8b PE=1 SV=1 - [RAB8B_MOUSE]                                                      | 29.47 | 11 | 1  | 7  | 63 | 1.09 | 1.23 | 1.13 | 1.11 | 1.02 | 0.80 | 0.73 | 0.86 | 0.79 | 0.77 | 0.71 | 1.05 | 0.97 | 23.59  | 9.07  |
| Q3U3R4- | Isoform 3 of Lipase maturation factor 1 OS=Mus musculus GN=Lmf1 - [LMF1_MOUSE]                                                    | 8.12  | 4  | 2  | 2  | 2  | 0.99 | 1.35 | 1.36 | 1.05 | 1.01 | 0.79 | 0.79 | 0.86 | 0.79 | 1.00 | 1.01 | 1.02 | 1.05 | 41.42  | 9.14  |
| Q8BVG4- | Isoform 2 of Dipeptidyl peptidase 9 OS=Mus musculus GN=Dpp9 - [DPP9_MOUSE]                                                        | 9.13  | 2  | 5  | 6  | 13 | 1.00 | 0.89 | 1.00 | 1.08 | 1.08 | 0.92 | 0.91 | 0.86 | 0.92 | 1.01 | 1.06 | 1.00 | 1.07 | 80.54  | 6.58  |
| O88444  | Adenylate cyclase type 1 OS=Mus musculus GN=Adcy1 PE=2 SV=2 - [ADCY1_MOUSE]                                                       | 13.60 | 1  | 10 | 10 | 20 | 0.99 | 1.08 | 1.11 | 1.08 | 1.20 | 0.88 | 0.93 | 0.86 | 0.91 | 0.86 | 1.01 | 0.90 | 0.96 | 123.29 | 8.47  |
| Q80WS3  | rRNA/tRNA 2'-O-methyltransferase fibrillar-like protein 1 OS=Mus musculus GN=Fbll1 PE=2 SV=1 [FBLL1_MOUSE]                        | 15.61 | 1  | 3  | 5  | 11 | 0.97 | 0.90 | 0.83 | 0.98 | 1.01 | 0.99 | 0.98 | 0.86 | 0.91 | 0.89 | 0.87 | 1.01 | 0.93 | 33.32  | 10.15 |
| Q9ESW4  | Acylglycerol kinase, mitochondrial OS=Mus musculus GN=Agk PE=1 SV=1 - [AGK_MOUSE]                                                 | 23.52 | 1  | 9  | 9  | 26 | 0.94 | 1.03 | 1.07 | 1.15 | 1.21 | 0.94 | 0.94 | 0.86 | 0.90 | 0.91 | 0.98 | 1.00 | 1.03 | 46.95  | 8.40  |
| Q9ERF3  | WD repeat-containing protein 61 OS=Mus musculus GN=Wdr61 PE=2 SV=1 - [WDR61_MOUSE]                                                | 23.61 | 4  | 4  | 4  | 7  | 1.04 | 0.93 | 0.91 | 1.05 | 0.98 | 1.12 | 1.02 | 0.86 | 0.91 | 0.93 | 0.89 | 0.98 | 1.00 | 33.75  | 5.36  |
| E9QAQ3  | Rho GTPase-activating protein 26 OS=Mus musculus GN=Arhgap26 PE=2 SV=1 - [E9QAQ3_MOUSE]                                           | 7.51  | 4  | 5  | 5  | 8  | 0.89 | 1.13 | 1.24 | 1.09 | 1.24 | 0.87 | 0.97 | 0.86 | 0.97 | 1.04 | 1.10 | 0.87 | 1.04 | 85.90  | 6.74  |
| P05132  | cAMP-dependent protein kinase catalytic subunit alpha OS=Mus musculus GN=Prkaca PE=1 SV=3 - [KAPCA_MOUSE]                         | 40.46 | 2  | 8  | 13 | 49 | 1.05 | 0.91 | 0.87 | 1.17 | 1.09 | 0.91 | 0.85 | 0.86 | 0.85 | 0.82 | 0.84 | 1.01 | 0.95 | 40.54  | 8.79  |

|        |                                                                                                                                       |       |   |    |    |    |      |      |      |      |      |      |      |      |      |      |      |      |      |        |       |
|--------|---------------------------------------------------------------------------------------------------------------------------------------|-------|---|----|----|----|------|------|------|------|------|------|------|------|------|------|------|------|------|--------|-------|
| Q60771 | Claudin-11 OS=Mus musculus GN=Cldn11 PE=1 SV=1 - [CLD11_MOUSE]                                                                        | 10.63 | 1 | 3  | 3  | 40 | 0.99 | 1.26 | 1.27 | 1.01 | 1.00 | 0.94 | 0.91 | 0.86 | 0.86 | 0.85 | 0.84 | 0.90 | 0.93 | 22.10  | 7.91  |
| Q9D1M0 | Protein SEC13 homolog OS=Mus musculus GN=Sec13 PE=2 SV=3 - [SEC13_MOUSE]                                                              | 25.16 | 1 | 7  | 7  | 20 | 1.03 | 0.95 | 0.93 | 0.95 | 0.87 | 0.90 | 0.78 | 0.86 | 0.86 | 0.85 | 0.84 | 0.90 | 0.87 | 35.54  | 5.38  |
| P61164 | Alpha-centractin OS=Mus musculus GN=Actr1a PE=2 SV=1 - [ACTZ_MOUSE]                                                                   | 32.98 | 1 | 5  | 10 | 38 | 0.92 | 1.03 | 1.18 | 1.05 | 1.16 | 0.98 | 1.21 | 0.86 | 0.92 | 1.00 | 1.11 | 0.95 | 1.28 | 42.59  | 6.64  |
| Q9CR10 | Oxidoreductase-like domain-containing protein 1 OS=Mus musculus GN=Oxdl1 PE=2 SV=1 - [OXLD1_MOUSE]                                    | 14.93 | 2 | 2  | 2  | 4  | 0.93 | 0.65 | 0.66 | 0.75 | 0.86 | 1.05 | 0.99 | 0.86 | 0.98 | 0.90 | 0.96 | 0.88 | 0.95 | 22.16  | 8.05  |
| D3Z517 | Inactive dipeptidyl peptidase 10 OS=Mus musculus GN=Dpp10 PE=2 SV=1 - [D3Z517_MOUSE]                                                  | 27.35 | 3 | 16 | 17 | 33 | 1.12 | 1.03 | 0.91 | 1.09 | 0.94 | 0.92 | 0.82 | 0.86 | 0.76 | 0.91 | 0.86 | 0.91 | 0.84 | 85.31  | 6.42  |
| M0QWG6 | Retinal rod rhodopsin-sensitive cGMP 3',5'-cyclic phosphodiesterase subunit delta OS=Mus musculus GN=Pde6d PE=4 SV=1 - [M0QWG6_MOUSE] | 25.00 | 2 | 2  | 2  | 3  | 1.07 | 0.95 | 0.89 | 1.13 | 1.05 | 0.92 | 0.86 | 0.86 | 0.80 | 0.96 | 0.90 | 1.02 | 0.96 | 14.34  | 6.14  |
| O89112 | LanC-like protein 1 OS=Mus musculus GN=Lanc1 PE=1 SV=1 - [LANC1_MOUSE]                                                                | 16.79 | 2 | 5  | 5  | 13 | 0.97 | 1.08 | 1.11 | 1.03 | 1.06 | 0.89 | 0.97 | 0.86 | 0.89 | 0.92 | 0.94 | 1.02 | 1.03 | 45.31  | 7.77  |
| E0CYG3 | Sperm flagellar protein 2 OS=Mus musculus GN=Spf2 PE=2 SV=1 - [E0CYG3_MOUSE]                                                          | 0.70  | 3 | 1  | 1  | 3  | 1.02 | 0.77 | 0.75 | 0.86 | 0.84 | 0.97 | 0.94 | 0.86 | 0.84 | 0.95 | 0.93 | 0.81 | 0.79 | 197.85 | 5.86  |
| F5H8M6 | MCG9349 OS=Mus musculus GN=Rps18-ps3 PE=3 SV=2 - [F5H8M6_MOUSE]                                                                       | 39.16 | 1 | 1  | 6  | 40 | 0.46 | 0.79 | 1.72 | 0.92 | 2.02 | 0.84 | 1.83 | 0.86 | 1.87 | 1.37 | 3.02 | 0.84 | 1.84 | 16.72  | 10.96 |
| E9Q3K3 | Arf-GAP with GTPase, ANK repeat and PH domain-containing protein 1 OS=Mus musculus GN=Agap1 PE=2 SV=1 - [E9Q3K3_MOUSE]                | 18.91 | 2 | 8  | 10 | 37 | 1.06 | 1.07 | 1.00 | 1.02 | 1.00 | 0.96 | 0.93 | 0.86 | 0.86 | 0.97 | 0.89 | 1.06 | 0.98 | 88.97  | 8.03  |
| Q9EP69 | Phosphatidylinositol phosphatase SAC1 OS=Mus musculus GN=Sacm11 PE=2 SV=1 - [SAC1_MOUSE]                                              | 19.08 | 1 | 10 | 10 | 23 | 0.96 | 1.01 | 1.13 | 1.18 | 1.22 | 0.87 | 0.88 | 0.86 | 0.87 | 0.93 | 0.96 | 0.99 | 1.04 | 66.90  | 7.30  |
| P47962 | 60S ribosomal protein L5 OS=Mus musculus GN=Rpl5 PE=1 SV=3 - [RL5_MOUSE]                                                              | 27.61 | 2 | 8  | 8  | 28 | 0.95 | 0.85 | 0.88 | 1.01 | 1.07 | 0.90 | 0.97 | 0.86 | 0.91 | 0.88 | 1.01 | 0.95 | 1.04 | 34.38  | 9.77  |

|        |                                                                                                                                       |       |   |    |    |     |      |      |      |      |      |      |      |      |      |      |      |      |      |        |      |
|--------|---------------------------------------------------------------------------------------------------------------------------------------|-------|---|----|----|-----|------|------|------|------|------|------|------|------|------|------|------|------|------|--------|------|
| F7BAB2 | Protein Tmem132b<br>OS=Mus musculus<br>GN=Tmem132b PE=4<br>SV=1 -<br>[F7BAB2_MOUSE]                                                   | 18.18 | 1 | 14 | 14 | 36  | 1.00 | 1.07 | 1.07 | 0.93 | 0.89 | 0.79 | 0.76 | 0.86 | 0.85 | 0.77 | 0.81 | 0.83 | 0.82 | 119.25 | 4.87 |
| P60670 | Nuclear protein<br>localization protein 4<br>homolog OS=Mus<br>musculus GN=Nploc4<br>PE=1 SV=3 -<br>[NPL4_MOUSE]                      | 10.53 | 2 | 5  | 5  | 8   | 1.05 | 0.90 | 0.92 | 1.04 | 1.02 | 0.91 | 0.77 | 0.86 | 0.79 | 0.93 | 0.78 | 0.94 | 0.82 | 67.97  | 6.46 |
| Q60714 | Long-chain fatty acid<br>transport protein 1<br>OS=Mus musculus<br>GN=Slc27a1 PE=1<br>SV=1 -<br>[S27A1_MOUSE]                         | 5.26  | 1 | 3  | 3  | 5   | 1.06 | 1.30 | 1.22 | 1.02 | 0.91 | 0.85 | 0.79 | 0.86 | 0.85 | 0.89 | 0.80 | 1.06 | 0.99 | 71.23  | 8.38 |
| Q8R420 | ATP-binding cassette<br>sub-family A member<br>3 OS=Mus musculus<br>GN=Abca3 PE=2<br>SV=3 -<br>[ABCA3_MOUSE]                          | 1.41  | 2 | 2  | 2  | 4   | 0.95 | 1.20 | 1.26 | 1.10 | 1.16 | 0.88 | 0.92 | 0.86 | 0.90 | 1.01 | 1.07 | 0.91 | 0.96 | 191.85 | 7.17 |
| A2AU4  | Protein Baz2b<br>OS=Mus musculus<br>GN=Baz2b PE=4<br>SV=1 -<br>[A2AU4_MOUSE]                                                          | 2.07  | 1 | 1  | 1  | 4   | 0.71 | 0.45 | 0.63 | 0.99 | 1.39 | 0.65 | 0.90 | 0.86 | 1.20 | 0.70 | 0.98 | 0.51 | 0.72 | 233.86 | 6.55 |
| Q80YD6 | Secretion-regulating<br>guanine nucleotide<br>exchange factor<br>OS=Mus musculus<br>GN=Sergef PE=2<br>SV=2 -<br>[SRGEF_MOUSE]         | 4.96  | 2 | 2  | 2  | 4   | 0.94 | 1.36 | 1.44 | 0.93 | 0.99 | 1.04 | 1.11 | 0.86 | 0.91 | 1.22 | 1.31 | 0.98 | 1.05 | 49.19  | 6.19 |
| A2AL15 | Adherens junction-<br>associated protein 1<br>OS=Mus musculus<br>GN=Ajap1 PE=2<br>SV=1 -<br>[AJAP1_MOUSE]                             | 4.37  | 1 | 1  | 1  | 2   | 1.14 | 1.60 | 1.40 | 1.18 | 1.03 | 1.04 | 0.90 | 0.86 | 0.75 | 1.03 | 0.91 | 1.08 | 0.95 | 44.74  | 9.42 |
| P27601 | Guanine nucleotide-<br>binding protein subunit<br>alpha-13 OS=Mus<br>musculus GN=Gna13<br>PE=1 SV=1 -<br>[GNA13_MOUSE]                | 42.97 | 6 | 13 | 14 | 48  | 1.11 | 1.06 | 0.95 | 1.11 | 0.97 | 0.97 | 0.89 | 0.86 | 0.83 | 1.03 | 0.94 | 0.98 | 0.92 | 44.03  | 8.21 |
| Q9CSU0 | Isoform 2 of<br>Regulation of nuclear<br>pre-mRNA domain-<br>containing protein 1B<br>OS=Mus musculus<br>GN=Rprd1b -<br>[RPR1B_MOUSE] | 15.65 | 5 | 3  | 3  | 6   | 0.90 | 0.76 | 0.98 | 0.93 | 1.02 | 0.79 | 0.83 | 0.86 | 0.96 | 0.86 | 0.97 | 0.84 | 0.95 | 33.49  | 5.64 |
| E9Q2W9 | Alpha-actinin-4<br>(Fragment) OS=Mus<br>musculus GN=Actn4<br>PE=2 SV=1 -<br>[E9Q2W9_MOUSE]                                            | 59.65 | 2 | 1  | 27 | 162 | 0.95 | 0.89 | 0.94 | 1.03 | 1.08 | 0.90 | 0.95 | 0.86 | 0.90 | 0.88 | 0.94 | 0.82 | 0.86 | 59.86  | 6.01 |

|          |                                                                                                                       |       |   |    |    |    |      |      |      |      |      |      |      |      |      |      |      |      |      |        |       |
|----------|-----------------------------------------------------------------------------------------------------------------------|-------|---|----|----|----|------|------|------|------|------|------|------|------|------|------|------|------|------|--------|-------|
| E9PY27   | Cytosolic endo-beta-N-acetylglucosaminidase OS=Mus musculus GN=Engase PE=4 SV=1 - [E9PY27_MOUSE]                      | 12.50 | 3 | 1  | 1  | 5  | 1.11 | 1.04 | 0.93 | 1.02 | 0.92 | 0.87 | 0.75 | 0.86 | 0.78 | 0.86 | 0.78 | 0.95 | 0.91 | 11.19  | 11.31 |
| Q9CQT2   | RNA-binding protein 7 OS=Mus musculus GN=Rbm7 PE=1 SV=1 - [RBM7_MOUSE]                                                | 11.70 | 1 | 3  | 3  | 4  | 1.06 | 1.02 | 0.96 | 0.88 | 0.84 | 0.81 | 0.76 | 0.86 | 0.78 | 1.06 | 0.97 | 0.91 | 0.86 | 30.13  | 9.38  |
| O55135   | Eukaryotic translation initiation factor 6 OS=Mus musculus GN=Eif6 PE=1 SV=2 - [IF6_MOUSE]                            | 21.22 | 2 | 3  | 3  | 9  | 1.01 | 1.13 | 1.02 | 1.17 | 1.03 | 0.96 | 0.86 | 0.86 | 0.84 | 0.94 | 0.86 | 1.05 | 0.97 | 26.49  | 4.74  |
| Q9Z2G6   | Protein sel-1 homolog 1 OS=Mus musculus GN=Sel1l PE=2 SV=2 - [SE1L1_MOUSE]                                            | 13.54 | 3 | 6  | 6  | 13 | 1.18 | 1.11 | 1.09 | 1.02 | 1.00 | 0.88 | 0.84 | 0.86 | 0.77 | 0.88 | 0.74 | 1.14 | 0.98 | 88.28  | 5.57  |
| Q8K411-2 | Isoform 2 of Presequence protease, mitochondrial OS=Mus musculus GN=Pitrm1 - [PREP_MOUSE]                             | 12.85 | 3 | 12 | 12 | 21 | 0.97 | 1.00 | 0.92 | 1.02 | 1.00 | 0.85 | 0.87 | 0.86 | 0.90 | 0.90 | 0.90 | 0.90 | 0.93 | 117.14 | 7.12  |
| Q3UVG3   | Protein FAM91A1 OS=Mus musculus GN=Fam91a1 PE=1 SV=1 - [F91A1_MOUSE]                                                  | 3.94  | 1 | 3  | 3  | 4  | 1.06 | 1.04 | 0.98 | 1.13 | 1.11 | 0.91 | 0.86 | 0.86 | 0.81 | 0.96 | 0.93 | 1.20 | 1.21 | 93.40  | 6.35  |
| Q9EPN1-  | Isoform 3 of Neurobeachin OS=Mus musculus GN=Nbea - [NBEA_MOUSE]                                                      | 14.12 | 4 | 22 | 27 | 54 | 0.98 | 1.03 | 1.07 | 1.10 | 1.10 | 0.94 | 0.95 | 0.86 | 0.90 | 0.94 | 0.94 | 0.97 | 1.05 | 323.00 | 6.15  |
| Q9CRA7   | ATP synthase subunit s, mitochondrial OS=Mus musculus GN=Atp5s PE=2 SV=1 - [ATP5S_MOUSE]                              | 13.50 | 1 | 1  | 1  | 2  | 1.01 | 0.73 | 0.72 | 0.87 | 0.86 | 0.98 | 0.96 | 0.86 | 0.85 | 0.96 | 0.95 | 1.03 | 1.02 | 23.26  | 8.06  |
| Q8BUN5   | Mothers against decapentaplegic homolog 3 OS=Mus musculus GN=Smad3 PE=1 SV=2 - [SMAD3_MOUSE]                          | 8.71  | 4 | 1  | 3  | 5  | 1.02 | 1.09 | 1.06 | 0.99 | 0.96 | 0.85 | 0.83 | 0.86 | 0.84 | 0.93 | 0.91 | 0.96 | 0.94 | 48.05  | 7.15  |
| Q80UM7   | Mannosyl-oligosaccharide glucosidase OS=Mus musculus GN=Mogs PE=2 SV=1 - [MOGS_MOUSE]                                 | 16.07 | 1 | 9  | 9  | 13 | 0.89 | 1.20 | 1.24 | 0.96 | 1.04 | 0.77 | 0.83 | 0.86 | 0.90 | 0.74 | 0.77 | 0.85 | 0.92 | 91.77  | 9.00  |
| Q3TDN2   | FAS-associated factor 2 OS=Mus musculus GN=Fat2 PE=2 SV=2 - [FAF2_MOUSE]                                              | 23.37 | 5 | 6  | 6  | 11 | 1.04 | 1.03 | 0.99 | 1.04 | 1.08 | 0.87 | 0.87 | 0.86 | 0.88 | 0.95 | 0.94 | 1.05 | 1.00 | 52.44  | 5.47  |
| Q14C51   | Pentatricopeptide repeat domain-containing protein 3, mitochondrial OS=Mus musculus GN=Ptc3 PE=2 SV=2 - [PTCD3_MOUSE] | 5.55  | 1 | 3  | 3  | 6  | 0.91 | 0.91 | 1.01 | 1.06 | 1.09 | 0.86 | 0.96 | 0.86 | 0.94 | 0.91 | 1.00 | 0.85 | 0.91 | 77.75  | 5.88  |

|          |                                                                                                             |       |   |    |    |     |      |      |      |      |      |      |      |      |      |      |      |      |      |        |      |
|----------|-------------------------------------------------------------------------------------------------------------|-------|---|----|----|-----|------|------|------|------|------|------|------|------|------|------|------|------|------|--------|------|
| A8Y5H7   | Protein Sec1411<br>OS=Mus musculus<br>GN=Sec1411 PE=2<br>SV=1 -<br>[A8Y5H7_MOUSE]                           | 1.26  | 3 | 1  | 1  | 2   | 0.81 | 0.97 | 1.21 | 0.93 | 1.16 | 0.83 | 1.02 | 0.86 | 1.06 | 0.82 | 1.02 | 0.78 | 0.97 | 81.16  | 6.34 |
| Q80ZJ1   | Ras-related protein Rap2a<br>OS=Mus musculus<br>GN=Rap2a PE=1<br>SV=2 -<br>[RAP2A_MOUSE]                    | 58.47 | 3 | 3  | 8  | 37  | 1.09 | 0.98 | 0.88 | 1.04 | 0.97 | 0.90 | 0.87 | 0.86 | 0.81 | 0.86 | 0.80 | 0.88 | 0.83 | 20.63  | 4.82 |
| P50516   | V-type proton ATPase catalytic subunit A<br>OS=Mus musculus<br>GN=Atp6v1a PE=1<br>SV=2 -<br>[VATA_MOUSE]    | 69.53 | 5 | 36 | 36 | 417 | 0.94 | 1.00 | 1.06 | 1.03 | 1.11 | 0.89 | 0.94 | 0.86 | 0.93 | 0.92 | 0.97 | 0.90 | 0.99 | 68.28  | 5.58 |
| P97393   | Rho GTPase-activating protein 5<br>OS=Mus musculus<br>GN=Arhgap5 PE=2<br>SV=2 -<br>[RHG05_MOUSE]            | 9.66  | 2 | 11 | 11 | 19  | 0.94 | 0.99 | 1.04 | 1.05 | 0.99 | 0.93 | 0.91 | 0.86 | 0.94 | 1.01 | 0.94 | 1.03 | 0.93 | 172.00 | 6.34 |
| Q6ZQ38   | Cullin-associated NEDD8-dissociated protein 1<br>OS=Mus musculus GN=Cand1<br>PE=2 SV=2 -<br>[CAND1_MOUSE]   | 31.22 | 3 | 30 | 30 | 77  | 1.00 | 0.92 | 0.90 | 1.10 | 1.12 | 0.90 | 0.88 | 0.86 | 0.86 | 0.96 | 0.96 | 1.01 | 1.00 | 136.24 | 5.78 |
| P57746   | V-type proton ATPase subunit D<br>OS=Mus musculus<br>GN=Atp6v1d PE=1<br>SV=1 -<br>[VATD_MOUSE]              | 59.11 | 1 | 14 | 14 | 37  | 0.94 | 1.01 | 1.06 | 1.02 | 1.04 | 0.94 | 0.92 | 0.86 | 0.95 | 0.86 | 0.94 | 0.96 | 1.00 | 28.35  | 9.45 |
| P20917-2 | Isoform S-MAG of Myelin-associated glycoprotein<br>OS=Mus musculus GN=Mag -<br>[MAG_MOUSE]                  | 32.13 | 1 | 1  | 14 | 72  | 0.90 | 0.85 | 0.94 | 0.95 | 1.06 | 0.92 | 1.02 | 0.86 | 0.96 | 0.81 | 0.90 | 0.80 | 0.89 | 64.23  | 5.08 |
| Q9R078   | 5'-AMP-activated protein kinase subunit beta-1<br>OS=Mus musculus GN=Prkab1<br>PE=1 SV=2 -<br>[AAKB1_MOUSE] | 18.89 | 1 | 3  | 3  | 6   | 1.00 | 0.84 | 0.91 | 1.00 | 1.04 | 0.97 | 0.96 | 0.86 | 0.86 | 0.92 | 0.93 | 0.88 | 0.93 | 30.29  | 6.23 |
| Q05CH9   | E3 ubiquitin-protein ligase RNF123 (Fragment)<br>OS=Mus musculus GN=Rnf123<br>PE=2 SV=1 -<br>[Q05CH9_MOUSE] | 3.63  | 7 | 2  | 2  | 2   | 1.03 | 1.15 | 1.12 | 1.11 | 1.08 | 0.89 | 0.86 | 0.86 | 0.84 | 0.99 | 0.97 | 0.99 | 0.97 | 140.56 | 6.74 |
| Q8BWY3   | Eukaryotic peptide chain release factor subunit 1<br>OS=Mus musculus GN=Erf1<br>PE=1 SV=4 -<br>[ERF1_MOUSE] | 8.92  | 1 | 4  | 4  | 8   | 1.11 | 1.13 | 1.04 | 0.99 | 0.89 | 0.94 | 0.94 | 0.86 | 0.82 | 0.96 | 0.87 | 1.01 | 1.01 | 49.00  | 5.71 |
| Q8CHP8   | Phosphoglycolate phosphatase<br>OS=Mus musculus GN=Pgp<br>PE=2 SV=1 -<br>[PGP_MOUSE]                        | 26.48 | 1 | 6  | 6  | 25  | 0.90 | 1.21 | 1.42 | 1.02 | 1.10 | 0.91 | 1.04 | 0.86 | 1.00 | 0.87 | 0.96 | 0.91 | 0.96 | 34.52  | 5.35 |

|          |                                                                                                              |       |   |    |    |     |      |      |      |      |      |      |      |      |      |      |      |      |      |        |      |
|----------|--------------------------------------------------------------------------------------------------------------|-------|---|----|----|-----|------|------|------|------|------|------|------|------|------|------|------|------|------|--------|------|
| Q6A099   | MKIAA0248 protein (Fragment) OS=Mus musculus GN=Gbf1 PE=2 SV=1 - [Q6A099_MOUSE]                              | 1.11  | 3 | 2  | 2  | 5   | 1.07 | 1.26 | 1.22 | 1.23 | 1.14 | 0.91 | 0.87 | 0.86 | 0.83 | 1.14 | 0.97 | 1.09 | 1.06 | 200.06 | 5.80 |
| E9Q1S3   | Protein transport protein Sec23A OS=Mus musculus GN=Sec23a PE=2 SV=1 - [E9Q1S3_MOUSE]                        | 27.72 | 5 | 13 | 16 | 29  | 1.13 | 1.11 | 1.13 | 1.07 | 0.99 | 0.90 | 0.89 | 0.86 | 1.00 | 0.89 | 0.86 | 0.96 | 0.87 | 82.90  | 7.46 |
| P46460   | Vesicle-fusing ATPase OS=Mus musculus GN=Nsf PE=1 SV=2 - [NSF_MOUSE]                                         | 72.98 | 3 | 46 | 47 | 356 | 0.95 | 0.92 | 0.96 | 1.05 | 1.10 | 0.89 | 0.93 | 0.86 | 0.90 | 0.92 | 0.99 | 0.96 | 1.00 | 82.56  | 6.95 |
| Q9WUM3   | Coronin-1B OS=Mus musculus GN=Coro1b PE=1 SV=1 - [COR1B_MOUSE]                                               | 18.60 | 2 | 9  | 9  | 17  | 1.06 | 1.11 | 1.04 | 1.00 | 0.90 | 0.85 | 0.81 | 0.86 | 0.79 | 0.88 | 0.79 | 1.03 | 0.93 | 53.88  | 5.78 |
| Q99MV7   | Isoform 3 of RING finger protein 17 OS=Mus musculus GN=Rnf17 - [RNF17_MOUSE]                                 | 1.04  | 3 | 1  | 1  | 1   | 1.19 | 9.85 | 8.28 | 1.30 | 1.10 | 1.27 | 1.07 | 0.86 | 0.72 | 0.72 | 0.60 | 0.48 | 0.41 | 121.09 | 5.48 |
| E9Q2V5   | Protein BC037034 OS=Mus musculus GN=BC037034 PE=4 SV=1 - [E9Q2V5_MOUSE]                                      | 4.83  | 3 | 2  | 2  | 4   | 1.11 | 1.19 | 1.07 | 1.14 | 1.02 | 0.96 | 0.85 | 0.86 | 0.77 | 1.01 | 0.91 | 1.10 | 0.99 | 62.71  | 8.68 |
| Q8K3E5   | Isoform 2 of Jouberin OS=Mus musculus GN=Ahi1 - [AHI1_MOUSE]                                                 | 5.97  | 4 | 5  | 5  | 8   | 1.63 | 1.32 | 0.82 | 0.96 | 0.62 | 0.83 | 0.56 | 0.86 | 0.56 | 1.24 | 0.86 | 1.42 | 0.89 | 114.86 | 6.89 |
| Q8K2P6   | Rieske domain-containing protein OS=Mus musculus GN=Rfesd PE=1 SV=1 - [RFESD_MOUSE]                          | 7.64  | 1 | 1  | 1  | 3   | 1.01 | 0.79 | 0.78 | 0.87 | 0.86 | 0.80 | 0.78 | 0.86 | 0.85 | 0.65 | 0.65 | 0.71 | 0.70 | 17.95  | 6.86 |
| Q8CGC7   | Bifunctional glutamate/proline--tRNA ligase OS=Mus musculus GN=Eprs PE=1 SV=4 - [SYEP_MOUSE]                 | 28.90 | 1 | 34 | 34 | 70  | 0.98 | 0.98 | 1.01 | 1.08 | 1.10 | 0.95 | 0.95 | 0.86 | 0.88 | 0.93 | 0.98 | 0.94 | 0.97 | 169.97 | 7.66 |
| Q64514-2 | Isoform Short of Tripeptidyl-peptidase 2 OS=Mus musculus GN=Tpp2 - [TPP2_MOUSE]                              | 19.06 | 2 | 20 | 20 | 38  | 0.97 | 0.97 | 0.98 | 1.00 | 1.03 | 0.94 | 0.93 | 0.86 | 0.90 | 0.94 | 0.98 | 0.93 | 0.98 | 138.38 | 6.38 |
| Q8C4T8   | G protein-activated inward rectifier potassium channel 2 OS=Mus musculus GN=Kcnj6 PE=2 SV=1 - [Q8C4T8_MOUSE] | 10.14 | 4 | 3  | 3  | 6   | 0.92 | 0.92 | 1.00 | 1.18 | 1.14 | 0.79 | 0.96 | 0.86 | 0.93 | 0.88 | 1.06 | 0.73 | 0.87 | 47.45  | 5.52 |
| P35293   | Ras-related protein Rab18 OS=Mus musculus GN=Rab18 PE=2 SV=2 - [RAB18_MOUSE]                                 | 59.71 | 1 | 10 | 10 | 17  | 1.05 | 1.03 | 0.98 | 1.12 | 1.06 | 0.91 | 0.91 | 0.86 | 0.84 | 0.95 | 0.91 | 0.95 | 0.90 | 23.02  | 5.36 |



|        |                                                                                                                                        |       |   |    |    |    |      |      |      |      |      |      |      |      |      |      |      |      |      |        |      |
|--------|----------------------------------------------------------------------------------------------------------------------------------------|-------|---|----|----|----|------|------|------|------|------|------|------|------|------|------|------|------|------|--------|------|
| O88741 | Ganglioside-induced differentiation-associated protein 1<br>OS=Mus musculus<br>GN=Gdap1 PE=1<br>SV=1 -<br>[GDAP1_MOUSE]                | 37.71 | 2 | 9  | 10 | 22 | 0.97 | 1.04 | 0.98 | 1.07 | 1.07 | 0.82 | 0.79 | 0.86 | 0.81 | 0.86 | 0.89 | 0.88 | 0.84 | 41.28  | 8.37 |
| Q61334 | B-cell receptor-associated protein 29<br>OS=Mus musculus<br>GN=Bcap29 PE=1<br>SV=1 -<br>[BAP29_MOUSE]                                  | 9.58  | 1 | 2  | 2  | 3  | 0.98 | 0.96 | 0.98 | 1.18 | 1.20 | 0.88 | 0.89 | 0.86 | 0.88 | 0.92 | 0.94 | 0.98 | 1.01 | 27.95  | 9.72 |
| Q8BP78 | Protein FRA10AC1 homolog<br>OS=Mus musculus<br>GN=Fra10ac1 PE=1<br>SV=3 -<br>[F10C1_MOUSE]                                             | 8.57  | 1 | 2  | 2  | 4  | 0.85 | 0.73 | 0.86 | 0.88 | 1.04 | 0.74 | 0.86 | 0.86 | 1.01 | 0.76 | 0.89 | 0.64 | 0.75 | 37.18  | 7.28 |
| D3YXJ0 | Protein Dgkh<br>OS=Mus musculus<br>GN=Dgkh PE=4<br>SV=1 -<br>[D3YXJ0_MOUSE]                                                            | 11.25 | 1 | 9  | 9  | 16 | 1.00 | 0.92 | 0.90 | 1.08 | 1.07 | 0.90 | 0.87 | 0.86 | 0.85 | 1.00 | 1.02 | 1.01 | 1.00 | 127.28 | 6.33 |
| Q9JM63 | ATP-sensitive inward rectifier potassium channel 10<br>OS=Mus musculus<br>GN=Kcnj10 PE=1<br>SV=1 -<br>[IRK10_MOUSE]                    | 10.82 | 1 | 3  | 3  | 6  | 1.32 | 1.01 | 0.76 | 1.02 | 0.74 | 0.83 | 0.60 | 0.86 | 0.65 | 0.88 | 0.67 | 0.83 | 0.62 | 42.41  | 8.29 |
| Q9JF3  | Bifunctional lysine-specific demethylase and histidyl-hydroxylase<br>NO66<br>OS=Mus musculus<br>GN=No66 PE=1<br>SV=2 -<br>[NO66_MOUSE] | 4.15  | 1 | 2  | 2  | 3  | 1.01 | 0.93 | 0.92 | 1.11 | 1.10 | 1.02 | 1.01 | 0.86 | 0.85 | 1.06 | 1.05 | 0.66 | 0.66 | 67.51  | 8.66 |
| P62827 | GTP-binding nuclear protein Ran<br>OS=Mus musculus<br>GN=Ran PE=1<br>SV=3 -<br>[RAN_MOUSE]                                             | 42.13 | 3 | 8  | 8  | 28 | 0.92 | 0.99 | 0.97 | 1.04 | 1.09 | 0.91 | 0.94 | 0.86 | 0.88 | 0.91 | 0.95 | 0.95 | 1.03 | 24.41  | 7.49 |
| P67871 | Casein kinase II subunit beta<br>OS=Mus musculus<br>GN=Csnk2b PE=1<br>SV=1 -<br>[CSK2B_MOUSE]                                          | 51.16 | 7 | 10 | 10 | 41 | 0.86 | 0.94 | 1.05 | 1.00 | 1.11 | 0.90 | 0.95 | 0.86 | 0.91 | 0.93 | 0.94 | 0.92 | 1.03 | 24.93  | 5.55 |
| Q99M85 | Transcriptional repressor scratch 1<br>OS=Mus musculus<br>GN=Scr1 PE=1<br>SV=1 -<br>[SCR1_MOUSE]                                       | 5.17  | 1 | 1  | 1  | 2  | 0.87 | 0.95 | 1.10 | 0.88 | 1.02 | 0.88 | 1.01 | 0.86 | 0.99 | 0.91 | 1.06 | 0.76 | 0.87 | 35.90  | 9.54 |
| P40240 | CD9 antigen<br>OS=Mus musculus<br>GN=Cd9 PE=1<br>SV=2 -<br>[CD9_MOUSE]                                                                 | 16.37 | 1 | 3  | 3  | 7  | 0.98 | 1.15 | 1.13 | 0.98 | 0.93 | 0.85 | 1.13 | 0.86 | 0.98 | 0.91 | 1.02 | 0.98 | 1.05 | 25.24  | 7.23 |
| Q9D0L8 | mRNA cap guanine-N7 methyltransferase<br>OS=Mus musculus<br>GN=Rnmt PE=1<br>SV=1 -<br>[MCES_MOUSE]                                     | 21.72 | 6 | 7  | 7  | 11 | 0.92 | 0.97 | 0.96 | 0.95 | 0.96 | 0.90 | 0.98 | 0.86 | 0.89 | 0.92 | 0.97 | 1.06 | 0.99 | 53.26  | 6.48 |

|          |                                                                                                         |       |   |    |    |    |      |      |      |      |      |      |      |      |      |      |      |      |      |        |      |
|----------|---------------------------------------------------------------------------------------------------------|-------|---|----|----|----|------|------|------|------|------|------|------|------|------|------|------|------|------|--------|------|
| P21279   | Guanine nucleotide-binding protein G(q) subunit alpha OS=Mus musculus GN=Gnaq PE=1 SV=4 - [GNAQ_MOUSE]  | 43.73 | 1 | 9  | 13 | 41 | 1.10 | 1.14 | 1.07 | 1.10 | 1.02 | 0.88 | 0.82 | 0.86 | 0.78 | 0.91 | 0.87 | 0.98 | 0.97 | 42.13  | 5.68 |
| Q8R123   | FAD synthase OS=Mus musculus GN=Flad1 PE=1 SV=1 - [FAD1_MOUSE]                                          | 6.91  | 3 | 3  | 3  | 3  | 1.04 | 0.92 | 0.98 | 1.19 | 1.14 | 1.01 | 0.94 | 0.86 | 0.92 | 0.95 | 0.96 | 1.00 | 1.07 | 54.73  | 6.64 |
| P23819-4 | Isoform 4 of Glutamate receptor 2 OS=Mus musculus GN=Gria2 - [GRIA2_MOUSE]                              | 33.98 | 6 | 20 | 28 | 93 | 1.01 | 1.06 | 1.01 | 1.13 | 1.16 | 0.87 | 0.89 | 0.86 | 0.87 | 0.84 | 0.88 | 0.89 | 0.94 | 102.79 | 7.72 |
| G5E8R3   | Pyruvate carboxylase OS=Mus musculus GN=Pcx PE=3 SV=1 - [G5E8R3_MOUSE]                                  | 32.68 | 3 | 30 | 30 | 93 | 0.94 | 0.96 | 1.05 | 1.05 | 1.13 | 0.89 | 0.95 | 0.86 | 0.89 | 0.90 | 1.00 | 0.94 | 0.99 | 129.62 | 6.71 |
| P14106   | Complement C1q subcomponent subunit B OS=Mus musculus GN=C1qb PE=1 SV=2 - [C1QB_MOUSE]                  | 21.74 | 1 | 4  | 5  | 12 | 0.99 | 1.04 | 1.08 | 0.92 | 0.95 | 0.80 | 0.78 | 0.86 | 0.86 | 0.86 | 0.85 | 0.95 | 1.00 | 26.70  | 8.15 |
| P80315   | T-complex protein 1 subunit delta OS=Mus musculus GN=Cct4 PE=1 SV=3 - [TCPD_MOUSE]                      | 42.86 | 3 | 18 | 19 | 37 | 1.08 | 1.01 | 0.99 | 1.13 | 1.05 | 0.96 | 0.91 | 0.86 | 0.84 | 0.95 | 0.90 | 1.09 | 0.99 | 58.03  | 8.02 |
| Q91X11-2 | Isoform 2 of tRNA-dihydrouridine(47) synthase [NAD(P)(+)]-like OS=Mus musculus GN=Dus31 - [DUS3L_MOUSE] | 4.93  | 2 | 1  | 1  | 2  | 0.94 | 1.20 | 1.27 | 0.87 | 0.93 | 0.86 | 0.91 | 0.86 | 0.92 | 0.82 | 0.87 | 1.03 | 1.09 | 46.67  | 7.58 |
| Q8VE19   | WD repeat-containing protein mio OS=Mus musculus GN=Mios PE=2 SV=2 - [MIO_MOUSE]                        | 6.17  | 1 | 4  | 4  | 6  | 0.92 | 1.20 | 1.26 | 0.95 | 1.14 | 0.87 | 0.94 | 0.86 | 0.87 | 0.90 | 0.94 | 0.93 | 1.04 | 98.27  | 6.71 |
| A6H630   | UPF0364 protein Csof211 homolog OS=Mus musculus PE=2 SV=1 - [CF211_MOUSE]                               | 11.39 | 5 | 4  | 4  | 8  | 1.02 | 1.05 | 1.02 | 1.09 | 1.09 | 0.88 | 0.95 | 0.86 | 0.85 | 0.91 | 0.88 | 0.98 | 1.03 | 50.52  | 5.92 |
| Q8BJ71   | Nuclear pore complex protein Nup93 OS=Mus musculus GN=Nup93 PE=2 SV=1 - [NUP93_MOUSE]                   | 11.36 | 2 | 7  | 7  | 12 | 0.87 | 0.92 | 1.14 | 1.09 | 1.16 | 0.91 | 1.02 | 0.86 | 0.98 | 0.91 | 1.05 | 0.93 | 1.07 | 93.22  | 5.72 |
| O70503   | Estradiol 17-beta-dehydrogenase 12 OS=Mus musculus GN=Hsd17b12 PE=2 SV=1 - [DHB12_MOUSE]                | 20.19 | 2 | 5  | 5  | 9  | 0.96 | 0.86 | 0.99 | 1.14 | 1.17 | 0.86 | 0.89 | 0.86 | 0.90 | 0.90 | 0.94 | 0.87 | 0.83 | 34.72  | 9.52 |
| O35386   | Phytanoyl-CoA dioxygenase, peroxisomal OS=Mus musculus GN=Phyh PE=1 SV=1 - [PAHX_MOUSE]                 | 4.14  | 1 | 1  | 1  | 2  | 1.02 | 1.21 | 1.17 | 0.93 | 0.91 | 0.98 | 0.96 | 0.86 | 0.84 | 0.93 | 0.91 | 0.96 | 0.94 | 38.58  | 7.53 |

|          |                                                                                                                      |       |   |    |    |    |      |      |      |      |      |      |      |      |      |      |      |      |      |        |      |
|----------|----------------------------------------------------------------------------------------------------------------------|-------|---|----|----|----|------|------|------|------|------|------|------|------|------|------|------|------|------|--------|------|
| Q8R180   | ERO1-like protein alpha OS=Mus musculus GN=Ero11 PE=1 SV=2 - [ERO1A_MOUSE]                                           | 5.60  | 1 | 2  | 2  | 4  | 0.88 | 0.93 | 1.06 | 1.01 | 1.15 | 0.90 | 1.02 | 0.86 | 0.98 | 0.94 | 1.08 | 0.99 | 1.13 | 54.05  | 6.54 |
| Q35682   | Myeloid-associated differentiation marker OS=Mus musculus GN=Myadm PE=2 SV=2 - [MYADM_MOUSE]                         | 10.31 | 1 | 3  | 3  | 47 | 1.01 | 1.28 | 1.23 | 1.12 | 1.11 | 0.83 | 0.81 | 0.86 | 0.87 | 0.93 | 0.90 | 1.08 | 1.04 | 35.26  | 8.31 |
| Q9CX34   | Suppressor of G2 allele of SKP1 homolog OS=Mus musculus GN=Sugt1 PE=2 SV=3 - [SUGT1_MOUSE]                           | 58.33 | 1 | 16 | 17 | 61 | 0.99 | 0.87 | 0.88 | 0.95 | 0.97 | 0.83 | 0.87 | 0.86 | 0.91 | 0.84 | 0.84 | 0.79 | 0.83 | 38.14  | 5.45 |
| Q8CCJ9-2 | Isoform 2 of PHD finger protein 20-like protein 1 OS=Mus musculus GN=Phf2011 [P20L1_MOUSE]                           | 9.00  | 6 | 2  | 2  | 2  | 0.95 | 0.77 | 0.81 | 0.89 | 0.93 | 0.84 | 0.88 | 0.86 | 0.91 | 0.78 | 0.82 | 0.77 | 0.81 | 35.23  | 8.69 |
| P28271   | Cytoplasmic aconitate hydratase OS=Mus musculus GN=Aco1 PE=1 SV=3 - [ACOC_MOUSE]                                     | 20.81 | 2 | 15 | 15 | 25 | 0.96 | 0.99 | 1.09 | 1.02 | 1.09 | 0.88 | 0.94 | 0.86 | 0.89 | 0.99 | 0.98 | 0.94 | 1.08 | 98.06  | 7.50 |
| Q9JLC4-2 | Isoform 2 of VPS10 domain-containing receptor SorCS1 OS=Mus musculus GN=Sores1 - [SORC1_MOUSE]                       | 5.41  | 8 | 5  | 5  | 11 | 0.91 | 0.98 | 1.07 | 0.84 | 0.90 | 0.76 | 0.77 | 0.87 | 0.93 | 0.82 | 0.77 | 0.85 | 0.79 | 127.79 | 7.28 |
| Q9D6K8   | FUN14 domain-containing protein 2 OS=Mus musculus GN=Fund2 PE=2 SV=1 - [FUND2_MOUSE]                                 | 23.18 | 1 | 4  | 4  | 10 | 1.12 | 0.79 | 0.71 | 1.14 | 1.05 | 0.94 | 0.89 | 0.87 | 0.82 | 0.95 | 0.83 | 0.89 | 0.83 | 16.55  | 9.70 |
| A3KFX0   | Cytosolic 5'-nucleotidase 1A OS=Mus musculus GN=Nt5c1a PE=2 SV=1 - [SNT1A_MOUSE]                                     | 4.11  | 1 | 1  | 1  | 2  | 1.11 | 0.99 | 0.89 | 1.07 | 0.97 | 0.98 | 0.88 | 0.87 | 0.78 | 0.89 | 0.81 | 1.01 | 0.91 | 40.65  | 7.06 |
| Q91VA7   | Iso citrate dehydrogenase 3 (NAD+) beta OS=Mus musculus GN=ldh3b PE=2 SV=1 - [Q91VA7_MOUSE]                          | 38.02 | 1 | 12 | 12 | 77 | 0.95 | 0.91 | 0.98 | 1.04 | 1.07 | 0.89 | 0.94 | 0.87 | 0.92 | 0.89 | 0.96 | 0.91 | 0.98 | 42.17  | 8.60 |
| P11983   | T-complex protein 1 subunit alpha OS=Mus musculus GN=Tcp1 PE=1 SV=3 - [TCPA_MOUSE]                                   | 43.53 | 3 | 21 | 21 | 56 | 1.07 | 0.96 | 0.95 | 1.13 | 1.01 | 0.92 | 0.82 | 0.87 | 0.81 | 0.98 | 0.92 | 1.03 | 0.90 | 60.41  | 6.16 |
| P32037   | Solute carrier family 2, facilitated glucose transporter member 3 OS=Mus musculus GN=Slc2a3 PE=1 SV=1 - [GTR3_MOUSE] | 14.60 | 1 | 8  | 8  | 41 | 1.02 | 1.00 | 1.03 | 1.15 | 1.18 | 0.86 | 0.87 | 0.87 | 0.90 | 0.95 | 0.94 | 1.02 | 0.98 | 53.44  | 4.98 |

|          |                                                                                                                                       |       |   |    |    |     |      |      |      |      |      |      |      |      |      |      |      |      |      |        |       |
|----------|---------------------------------------------------------------------------------------------------------------------------------------|-------|---|----|----|-----|------|------|------|------|------|------|------|------|------|------|------|------|------|--------|-------|
| O55142   | 60S ribosomal protein L35a OS=Mus musculus GN=Rpl35a PE=2 SV=2 - [RL35A_MOUSE]                                                        | 6.36  | 1 | 1  | 1  | 1   | 1.01 | 1.01 | 1.00 | 0.96 | 0.96 | 0.90 | 0.89 | 0.87 | 0.86 | 0.92 | 0.91 | 0.86 | 0.86 | 12.55  | 10.89 |
| Q61151   | Serine/threonine-protein phosphatase 2A 56 kDa regulatory subunit epsilon isoform OS=Mus musculus GN=Ppp2r5e PE=2 SV=3 - [2A5E_MOUSE] | 21.84 | 1 | 7  | 9  | 19  | 1.03 | 0.97 | 0.92 | 1.12 | 1.03 | 1.01 | 0.92 | 0.87 | 0.87 | 0.97 | 0.98 | 1.08 | 1.05 | 54.68  | 6.95  |
| Q60675   | Laminin subunit alpha-2 OS=Mus musculus GN=Lama2 PE=1 SV=1 - [LAMA2_MOUSE]                                                            | 1.45  | 2 | 4  | 4  | 8   | 0.85 | 1.06 | 1.24 | 0.88 | 1.00 | 0.83 | 0.98 | 0.87 | 1.01 | 0.86 | 0.99 | 0.76 | 0.87 | 342.46 | 6.09  |
| P97390   | Vacuolar protein sorting-associated protein 45 OS=Mus musculus GN=Vps45 PE=1 SV=1 - [VPS45_MOUSE]                                     | 12.28 | 1 | 7  | 7  | 15  | 1.01 | 0.96 | 0.97 | 1.06 | 1.11 | 0.83 | 0.83 | 0.87 | 0.89 | 0.95 | 0.86 | 0.94 | 0.95 | 65.01  | 8.25  |
| Q02248   | Catenin beta-1 OS=Mus musculus GN=Ctnb1 PE=1 SV=1 - [CTNB1_MOUSE]                                                                     | 34.19 | 8 | 17 | 20 | 64  | 0.94 | 0.94 | 1.04 | 1.04 | 1.10 | 0.95 | 0.98 | 0.87 | 0.97 | 0.94 | 0.99 | 1.03 | 1.06 | 85.42  | 5.86  |
| Q06185   | ATP synthase subunit e, mitochondrial OS=Mus musculus GN=Atp5i PE=1 SV=2 - [ATP5I_MOUSE]                                              | 52.11 | 2 | 3  | 3  | 18  | 0.95 | 0.87 | 1.06 | 1.03 | 1.04 | 0.88 | 0.95 | 0.87 | 0.99 | 0.92 | 1.03 | 0.87 | 0.93 | 8.23   | 9.35  |
| Q61598   | Rab GDP dissociation inhibitor beta OS=Mus musculus GN=Gdi2 PE=1 SV=1 - [GDIB_MOUSE]                                                  | 74.38 | 2 | 22 | 30 | 142 | 1.03 | 0.85 | 0.86 | 1.05 | 1.00 | 0.88 | 0.89 | 0.87 | 0.83 | 0.90 | 0.88 | 0.94 | 0.93 | 50.50  | 6.25  |
| P17426-2 | Isoform B of AP-2 complex subunit alpha-1 OS=Mus musculus GN=Ap2a1 - [AP2A1_MOUSE]                                                    | 57.28 | 5 | 31 | 42 | 144 | 1.02 | 1.11 | 1.13 | 1.15 | 1.14 | 0.89 | 0.87 | 0.87 | 0.86 | 0.92 | 0.90 | 1.06 | 1.04 | 105.41 | 7.66  |
| Q8R5K2-2 | Isoform 2 of Ubiquitin carboxyl-terminal hydrolase 33 OS=Mus musculus GN=Usp33 - [UBP33_MOUSE]                                        | 3.00  | 2 | 2  | 2  | 4   | 1.09 | 0.96 | 0.88 | 0.98 | 0.90 | 1.02 | 0.93 | 0.87 | 0.79 | 0.89 | 0.82 | 0.96 | 0.88 | 101.77 | 5.68  |
| P45952   | Medium-chain specific acyl-CoA dehydrogenase, mitochondrial OS=Mus musculus GN=Acadm PE=1 SV=1 - [ACADM_MOUSE]                        | 17.58 | 2 | 6  | 6  | 18  | 1.03 | 1.18 | 1.09 | 1.07 | 1.09 | 0.97 | 0.93 | 0.87 | 0.86 | 1.01 | 0.98 | 1.06 | 1.01 | 46.45  | 8.37  |
| P07146   | Anionic trypsin-2 OS=Mus musculus GN=Prss2 PE=2 SV=1 - [TRY2_MOUSE]                                                                   | 8.13  | 1 | 1  | 1  | 2   | 0.97 | 1.14 | 1.18 | 0.91 | 0.94 | 0.96 | 0.98 | 0.87 | 0.89 | 0.89 | 0.92 | 0.84 | 0.87 | 26.19  | 4.63  |

|          |                                                                                                                          |       |   |    |    |     |      |      |      |      |      |      |      |      |      |      |      |      |      |        |       |
|----------|--------------------------------------------------------------------------------------------------------------------------|-------|---|----|----|-----|------|------|------|------|------|------|------|------|------|------|------|------|------|--------|-------|
| A6PWX7   | Ubiquinol-cytochrome c reductase complex chaperone CBP3 homolog OS=Mus musculus GN=Uqcc PE=2 SV=1 - [A6PWX7_MOUSE]       | 11.89 | 7 | 2  | 2  | 6   | 0.93 | 1.06 | 1.01 | 1.02 | 1.08 | 0.85 | 0.89 | 0.87 | 1.01 | 1.00 | 1.04 | 0.95 | 1.02 | 26.57  | 8.00  |
| Q80UW2   | F-box only protein 2 OS=Mus musculus GN=Fbxo2 PE=1 SV=1 - [FBX2_MOUSE]                                                   | 57.24 | 1 | 11 | 11 | 53  | 0.94 | 0.93 | 1.07 | 0.94 | 1.00 | 0.78 | 0.81 | 0.87 | 0.93 | 0.76 | 0.84 | 0.79 | 0.82 | 33.66  | 4.28  |
| Q5SW19   | Clustered mitochondria protein homolog OS=Mus musculus GN=Ctuh PE=2 SV=2 - [CLU_MOUSE]                                   | 3.95  | 3 | 4  | 4  | 7   | 0.98 | 1.21 | 1.19 | 1.05 | 1.03 | 0.99 | 1.01 | 0.87 | 0.90 | 0.97 | 0.98 | 0.99 | 1.00 | 147.97 | 6.02  |
| Q8BH61   | Coagulation factor XIII A chain OS=Mus musculus GN=F13a1 PE=2 SV=3 - [F13A_MOUSE]                                        | 2.32  | 1 | 1  | 1  | 2   | 1.00 | 0.73 | 0.73 | 1.06 | 1.06 | 0.95 | 0.94 | 0.87 | 0.86 | 0.99 | 0.99 | 0.97 | 0.97 | 83.15  | 5.92  |
| Q924T2   | 28S ribosomal protein S2, mitochondrial OS=Mus musculus GN=Mrps2 PE=2 SV=1 - [RT02_MOUSE]                                | 12.71 | 1 | 2  | 2  | 4   | 0.91 | 1.32 | 1.44 | 1.03 | 1.12 | 0.88 | 0.96 | 0.87 | 0.94 | 0.97 | 1.06 | 1.04 | 1.13 | 32.29  | 9.14  |
| Q9DC70   | NADH dehydrogenase [ubiquinone] iron-sulfur protein 7, mitochondrial OS=Mus musculus GN=Ndufs7 PE=1 SV=1 - [NDUS7_MOUSE] | 29.91 | 1 | 6  | 6  | 12  | 0.96 | 0.84 | 0.92 | 1.13 | 1.17 | 0.98 | 0.98 | 0.87 | 0.95 | 0.89 | 0.97 | 0.92 | 0.99 | 24.67  | 9.92  |
| Q9WTX6   | Cullin-1 OS=Mus musculus GN=Cul1 PE=1 SV=1 - [CUL1_MOUSE]                                                                | 13.27 | 3 | 9  | 9  | 15  | 1.02 | 1.05 | 0.94 | 1.05 | 1.01 | 0.82 | 0.88 | 0.87 | 0.87 | 0.93 | 0.86 | 0.95 | 0.96 | 89.63  | 8.00  |
| Q9JI8    | 60S ribosomal protein L38 OS=Mus musculus GN=Rpl38 PE=2 SV=3 - [RL38_MOUSE]                                              | 50.00 | 1 | 5  | 5  | 10  | 0.90 | 0.86 | 0.83 | 0.77 | 0.86 | 0.80 | 0.92 | 0.87 | 0.97 | 0.80 | 0.82 | 0.83 | 0.83 | 8.20   | 10.10 |
| Q9DB41   | Isoform 2 of Mitochondrial glutamate carrier 2 OS=Mus musculus GN=Slc25a18 - [GHC2_MOUSE]                                | 16.99 | 2 | 3  | 5  | 8   | 0.98 | 1.16 | 1.25 | 1.14 | 1.16 | 0.75 | 0.76 | 0.87 | 0.86 | 0.87 | 0.91 | 0.88 | 0.96 | 33.28  | 9.29  |
| P97300-3 | Isoform 3 of Neuroplastin OS=Mus musculus GN=Nptn - [NPTN_MOUSE]                                                         | 31.41 | 5 | 1  | 9  | 172 | 1.26 | 0.56 | 0.44 | 1.15 | 0.91 | 1.09 | 0.85 | 0.87 | 0.68 | 0.92 | 0.73 | 0.86 | 0.68 | 30.80  | 7.49  |
| Q9D0J4   | ADP-ribosylation factor-like protein 2 OS=Mus musculus GN=Arl2 PE=1 SV=1 - [ARL2_MOUSE]                                  | 15.76 | 1 | 2  | 2  | 3   | 1.07 | 1.07 | 0.99 | 1.19 | 1.11 | 0.98 | 0.91 | 0.87 | 0.81 | 0.95 | 0.89 | 1.14 | 1.06 | 20.85  | 5.96  |
| Q61161   | Mitogen-activated protein kinase kinase kinase 2 OS=Mus musculus GN=Map4k2 PE=1 SV=1 - [M4K2_MOUSE]                      | 4.14  | 2 | 2  | 2  | 4   | 0.92 | 1.13 | 1.23 | 1.13 | 1.23 | 0.98 | 1.06 | 0.87 | 0.94 | 1.07 | 1.16 | 1.21 | 1.32 | 91.21  | 6.46  |

|          |                                                                                                       |       |   |    |    |     |      |      |      |      |      |      |      |      |      |      |      |      |      |        |       |
|----------|-------------------------------------------------------------------------------------------------------|-------|---|----|----|-----|------|------|------|------|------|------|------|------|------|------|------|------|------|--------|-------|
| Q9WV18   | Gamma-aminobutyric acid type B receptor subunit 1 OS=Mus musculus GN=Gabbr1 PE=1 SV=1 - [GABR1_MOUSE] | 11.56 | 4 | 9  | 9  | 23  | 0.93 | 0.96 | 1.02 | 1.12 | 1.13 | 0.89 | 1.00 | 0.87 | 0.94 | 0.91 | 1.01 | 0.84 | 0.88 | 108.15 | 8.21  |
| Q3THK7   | GMP synthase [glutamine-hydrolyzing] OS=Mus musculus GN=Gmps PE=1 SV=2 - [GUAA_MOUSE]                 | 38.67 | 1 | 21 | 21 | 49  | 1.06 | 0.93 | 0.88 | 1.07 | 1.05 | 0.98 | 0.90 | 0.87 | 0.88 | 1.01 | 0.93 | 0.96 | 1.01 | 76.67  | 6.73  |
| Q4PJX1-3 | Isoform 3 of Protein odr-4 homolog OS=Mus musculus GN=Odr4 - [ODR4_MOUSE]                             | 2.17  | 3 | 1  | 1  | 2   | 0.97 | 1.14 | 1.17 | 1.12 | 1.15 | 0.83 | 0.85 | 0.87 | 0.89 | 0.94 | 0.97 | 1.02 | 1.05 | 46.47  | 6.27  |
| P27659   | 60S ribosomal protein L3 OS=Mus musculus GN=Rpl3 PE=2 SV=3 - [RL3_MOUSE]                              | 29.78 | 3 | 12 | 12 | 30  | 0.94 | 0.93 | 0.95 | 0.98 | 0.97 | 0.85 | 0.87 | 0.87 | 0.95 | 0.97 | 1.00 | 0.86 | 0.98 | 46.08  | 10.21 |
| Q8BSH3   | Tropomyosin alpha-1 chain OS=Mus musculus GN=Tpm1 PE=2 SV=1 - [Q8BSH3_MOUSE]                          | 65.14 | 3 | 6  | 26 | 348 | 1.14 | 0.64 | 0.52 | 0.92 | 0.80 | 2.02 | 1.41 | 0.87 | 0.83 | 0.92 | 0.94 | 1.02 | 0.71 | 32.68  | 4.74  |
| Q8CJF9   | Protein argonaute-3 OS=Mus musculus GN=Ago3 PE=2 SV=2 - [AGO3_MOUSE]                                  | 8.95  | 4 | 1  | 6  | 14  | 1.02 | 1.19 | 1.16 | 1.17 | 1.15 | 1.01 | 0.99 | 0.87 | 0.85 | 0.83 | 0.81 | 0.78 | 0.77 | 97.21  | 9.10  |
| Q9DBR3   | Isoform 3 of Armadillo repeat-containing protein 8 OS=Mus musculus GN=Arm8 - [ARMC8_MOUSE]            | 12.32 | 4 | 3  | 3  | 8   | 1.04 | 1.17 | 1.25 | 1.01 | 0.98 | 0.85 | 0.80 | 0.87 | 0.94 | 0.87 | 0.95 | 1.07 | 1.11 | 39.72  | 7.58  |
| Q3TDX8   | Isoform 2 of Cytochrome b5 reductase 4 OS=Mus musculus GN=Cyb5r4 - [NBSR4_MOUSE]                      | 5.03  | 3 | 1  | 2  | 22  | 0.83 | 1.02 | 1.22 | 0.94 | 1.13 | 0.99 | 1.18 | 0.87 | 1.04 | 0.89 | 1.07 | 0.83 | 1.00 | 53.96  | 6.44  |
| Q64387   | Prepronociceptin OS=Mus musculus GN=Pnoc PE=2 SV=1 - [PNOC_MOUSE]                                     | 37.97 | 2 | 4  | 4  | 6   | 1.54 | 1.00 | 0.65 | 0.81 | 0.57 | 0.80 | 0.60 | 0.87 | 0.65 | 0.95 | 0.63 | 0.99 | 0.70 | 20.87  | 8.56  |
| D3YU05   | Glyceraldehyde-3-phosphate dehydrogenase OS=Mus musculus GN=Gm6316 PE=3 SV=1 - [D3YU05_MOUSE]         | 44.54 | 1 | 1  | 13 | 230 | 0.80 | 0.86 | 1.07 | 1.42 | 1.78 | 1.12 | 1.39 | 0.87 | 1.08 | 1.11 | 1.38 | 1.38 | 1.73 | 36.52  | 8.46  |
| Q8VDC0   | Probable leucine-tRNA ligase, mitochondrial OS=Mus musculus GN=Lars2 PE=2 SV=1 - [SYLM_MOUSE]         | 11.42 | 1 | 7  | 7  | 14  | 1.01 | 1.16 | 1.06 | 1.03 | 0.95 | 0.96 | 0.95 | 0.87 | 0.86 | 1.04 | 0.91 | 1.11 | 1.05 | 101.41 | 8.19  |

|          |                                                                                                                                                           |       |   |    |    |     |      |      |      |      |      |      |      |      |      |      |      |      |      |        |      |
|----------|-----------------------------------------------------------------------------------------------------------------------------------------------------------|-------|---|----|----|-----|------|------|------|------|------|------|------|------|------|------|------|------|------|--------|------|
| Q8BMF4   | Dihydrolypoyllysine-residue acetyltransferase component of pyruvate dehydrogenase complex, mitochondrial OS=Mus musculus GN=Dlat PE=1 SV=2 - [ODP2_MOUSE] | 39.72 | 1 | 19 | 19 | 148 | 1.02 | 0.92 | 0.92 | 1.01 | 1.01 | 0.89 | 0.87 | 0.87 | 0.85 | 0.90 | 0.91 | 0.83 | 0.81 | 67.90  | 8.57 |
| Q9ER72   | Cysteine--tRNA ligase, cytoplasmic OS=Mus musculus GN=Cars PE=1 SV=2 - [SYCC_MOUSE]                                                                       | 26.71 | 2 | 18 | 18 | 43  | 0.97 | 1.01 | 1.06 | 1.04 | 1.05 | 0.86 | 0.98 | 0.87 | 0.97 | 0.91 | 0.95 | 0.92 | 0.95 | 94.80  | 6.76 |
| P51141   | Segment polarity protein dishevelled homolog DVL-1 OS=Mus musculus GN=Dvl1 PE=1 SV=2 - [DVL1_MOUSE]                                                       | 6.76  | 1 | 2  | 3  | 3   | 0.87 | 0.98 | 1.12 | 1.03 | 1.18 | 0.80 | 0.92 | 0.87 | 0.99 | 0.99 | 1.13 | 0.75 | 0.86 | 75.31  | 7.02 |
| Q9QE7E   | Translin-associated protein X OS=Mus musculus GN=Tsnax PE=1 SV=1 - [TSNAX_MOUSE]                                                                          | 37.93 | 1 | 9  | 9  | 15  | 1.02 | 1.24 | 1.21 | 1.11 | 1.10 | 0.87 | 0.91 | 0.87 | 0.90 | 0.92 | 0.89 | 1.07 | 1.05 | 32.91  | 6.55 |
| Q6PB93   | Polypeptide N-acetylgalactosaminyltransferase 2 OS=Mus musculus GN=Galnt2 PE=2 SV=1 - [GALT2_MOUSE]                                                       | 8.07  | 2 | 3  | 3  | 4   | 0.88 | 0.89 | 1.01 | 0.98 | 1.06 | 0.92 | 1.03 | 0.87 | 0.98 | 0.81 | 0.89 | 0.84 | 0.95 | 64.47  | 8.53 |
| A2AI19   | Glutamate receptor ionotropic, NMDA 1 OS=Mus musculus GN=Grin1 PE=2 SV=1 - [A2AI19_MOUSE]                                                                 | 14.54 | 8 | 12 | 12 | 37  | 1.10 | 1.25 | 1.11 | 1.21 | 1.13 | 0.81 | 0.76 | 0.87 | 0.82 | 0.82 | 0.81 | 0.88 | 0.86 | 101.25 | 8.27 |
| Q9ERE9   | C-Jun-amino-terminal kinase-interacting protein 2 OS=Mus musculus GN=Mapk8ip2 PE=1 SV=1 - [JIP2_MOUSE]                                                    | 3.49  | 1 | 2  | 2  | 3   | 0.88 | 0.88 | 1.00 | 0.84 | 0.95 | 1.03 | 1.16 | 0.87 | 0.99 | 0.92 | 1.05 | 1.08 | 1.23 | 89.84  | 4.42 |
| Q9DCP2   | Sodium-coupled neutral amino acid transporter 3 OS=Mus musculus GN=Slc38a3 PE=1 SV=1 - [S38A3_MOUSE]                                                      | 9.50  | 1 | 4  | 4  | 11  | 1.05 | 0.90 | 0.92 | 1.01 | 1.02 | 0.85 | 0.92 | 0.87 | 0.93 | 0.92 | 0.96 | 0.77 | 0.85 | 55.56  | 7.09 |
| Q8CFV9   | Riboflavin kinase OS=Mus musculus GN=Rfk PE=1 SV=2 - [RIFK_MOUSE]                                                                                         | 12.90 | 1 | 2  | 2  | 2   | 0.99 | 0.66 | 0.67 | 0.92 | 0.92 | 0.86 | 0.87 | 0.87 | 0.88 | 0.90 | 0.91 | 0.87 | 0.88 | 17.43  | 7.55 |
| P31324   | cAMP-dependent protein kinase type II-beta regulatory subunit OS=Mus musculus GN=Prkar2b PE=1 SV=3 - [KAP3_MOUSE]                                         | 63.94 | 2 | 18 | 20 | 136 | 0.91 | 1.13 | 1.18 | 1.03 | 1.10 | 0.92 | 0.97 | 0.87 | 1.00 | 0.93 | 1.04 | 1.07 | 1.15 | 46.14  | 4.98 |
| Q8R3B7-2 | Isoform 2 of Bromodomain-containing protein 8 OS=Mus musculus GN=Brd8 - [BRD8_MOUSE]                                                                      | 1.03  | 4 | 1  | 1  | 1   | 0.93 | 0.79 | 0.85 | 0.89 | 0.96 | 0.98 | 1.05 | 0.87 | 0.93 | 1.07 | 1.16 | 0.74 | 0.80 | 95.06  | 4.68 |

|        |                                                                                                                                                             |       |    |     |     |     |      |      |      |      |      |      |      |      |      |      |      |      |      |        |      |
|--------|-------------------------------------------------------------------------------------------------------------------------------------------------------------|-------|----|-----|-----|-----|------|------|------|------|------|------|------|------|------|------|------|------|------|--------|------|
| P58252 | Elongation factor 2<br>OS=Mus musculus<br>GN=Eef2 PE=1 SV=2 -<br>[EF2_MOUSE]                                                                                | 41.26 | 1  | 30  | 31  | 125 | 0.96 | 0.96 | 0.99 | 1.06 | 1.09 | 0.89 | 0.91 | 0.87 | 0.89 | 0.91 | 0.91 | 0.93 | 0.93 | 95.25  | 6.83 |
| E0CYH9 | Carboxyl-terminal PDZ<br>ligand of neuronal<br>nitric oxide synthase<br>protein (Fragment)<br>OS=Mus musculus<br>GN=Nos1ap PE=2<br>SV=1 -<br>[E0CYH9_MOUSE] | 20.61 | 5  | 2   | 2   | 2   | 0.90 | 0.87 | 0.97 | 0.94 | 1.05 | 0.87 | 0.97 | 0.87 | 0.97 | 0.82 | 0.92 | 0.85 | 0.95 | 25.42  | 9.16 |
| Q8BMP6 | Golgi resident protein<br>GCP60 OS=Mus<br>musculus GN=Acbd3<br>PE=1 SV=3 -<br>[GCP60_MOUSE]                                                                 | 23.05 | 1  | 7   | 7   | 14  | 0.97 | 0.91 | 0.99 | 0.95 | 1.02 | 0.96 | 0.98 | 0.87 | 0.92 | 0.99 | 0.94 | 0.99 | 1.01 | 60.14  | 5.11 |
| P14685 | 26S proteasome non-<br>ATPase regulatory<br>subunit 3 OS=Mus<br>musculus GN=Psm3<br>PE=1 SV=3 -<br>[PSMD3_MOUSE]                                            | 38.11 | 2  | 17  | 17  | 43  | 1.00 | 1.00 | 1.04 | 1.09 | 1.07 | 0.91 | 0.88 | 0.87 | 0.87 | 0.91 | 0.92 | 0.87 | 0.92 | 60.68  | 8.44 |
| B9EKN8 | TRAF2 and NCK<br>interacting kinase<br>OS=Mus musculus<br>GN=Tnik PE=2 SV=1 -<br>[B9EKN8_MOUSE]                                                             | 18.20 | 10 | 13  | 16  | 46  | 1.04 | 0.94 | 0.94 | 0.96 | 0.94 | 0.91 | 0.83 | 0.87 | 0.89 | 0.85 | 0.80 | 0.95 | 0.89 | 153.92 | 7.09 |
| B1AXS6 | Zinc finger MYM-type<br>protein 3 OS=Mus<br>musculus GN=Znym3<br>PE=2 SV=1 -<br>[B1AXS6_MOUSE]                                                              | 4.30  | 7  | 3   | 3   | 8   | 1.06 | 0.83 | 0.87 | 0.93 | 0.97 | 0.91 | 0.86 | 0.87 | 0.80 | 0.97 | 0.82 | 0.93 | 0.94 | 141.97 | 6.04 |
| Q8VD33 | Small glutamine-rich<br>tetratricopeptide repeat-<br>containing protein beta<br>OS=Mus musculus<br>GN=Sgtb PE=2 SV=1 -<br>[SGTB_MOUSE]                      | 25.66 | 3  | 6   | 6   | 19  | 0.84 | 0.73 | 0.79 | 0.77 | 0.89 | 0.80 | 0.94 | 0.87 | 1.01 | 0.77 | 0.97 | 0.74 | 0.85 | 33.41  | 4.92 |
| O35350 | Calpain-1 catalytic<br>subunit OS=Mus<br>musculus GN=Capn1<br>PE=2 SV=1 -<br>[CAN1_MOUSE]                                                                   | 8.42  | 1  | 5   | 5   | 8   | 0.97 | 0.74 | 0.88 | 1.02 | 1.09 | 0.85 | 0.87 | 0.87 | 0.88 | 0.91 | 0.91 | 0.85 | 0.85 | 82.05  | 5.87 |
| Q9JHU4 | Cytoplasmic dynein 1<br>heavy chain 1 OS=Mus<br>musculus<br>GN=Dync1h1 PE=1<br>SV=2 -<br>[DYHC1_MOUSE]                                                      | 38.85 | 3  | 151 | 152 | 427 | 0.96 | 1.02 | 1.07 | 1.12 | 1.16 | 0.89 | 0.90 | 0.87 | 0.90 | 0.95 | 0.97 | 1.02 | 1.07 | 531.71 | 6.42 |
| Q9R1V4 | Disintegrin and<br>metalloproteinase<br>domain-containing<br>protein 11 OS=Mus<br>musculus<br>GN=Adam11 PE=1<br>SV=2 -<br>[ADA11_MOUSE]                     | 7.63  | 2  | 4   | 4   | 8   | 1.12 | 1.02 | 1.10 | 1.08 | 0.94 | 0.93 | 0.91 | 0.87 | 0.80 | 1.06 | 1.07 | 0.92 | 0.88 | 84.08  | 7.50 |
| P12815 | Programmed cell death<br>protein 6 OS=Mus<br>musculus GN=Pcdc6<br>PE=1 SV=2 -<br>[PDCD6_MOUSE]                                                              | 35.60 | 1  | 5   | 5   | 8   | 0.96 | 0.92 | 1.02 | 1.09 | 1.22 | 0.97 | 1.02 | 0.87 | 0.96 | 0.98 | 0.99 | 1.04 | 1.04 | 21.85  | 5.40 |



|          |                                                                                                                                 |       |    |    |    |     |      |      |      |      |      |      |      |      |      |      |      |      |      |        |       |
|----------|---------------------------------------------------------------------------------------------------------------------------------|-------|----|----|----|-----|------|------|------|------|------|------|------|------|------|------|------|------|------|--------|-------|
| P47856-2 | Isoform 2 of Glutamine-fructose-6-phosphate aminotransferase [isomerizing] 1 OS=Mus musculus GN=Cfpt1 - [GFPT1_MOUSE]           | 4.99  | 3  | 3  | 3  | 5   | 0.98 | 1.16 | 1.12 | 1.06 | 0.98 | 0.94 | 0.92 | 0.87 | 0.88 | 1.04 | 0.98 | 0.94 | 0.96 | 76.67  | 6.77  |
| Q8C985-2 | Isoform 2b of Neurexin-3-beta OS=Mus musculus GN=Nrxn3 - [NRX3B_MOUSE]                                                          | 20.57 | 3  | 1  | 8  | 30  | 1.20 | 0.75 | 0.62 | 1.15 | 0.96 | 1.01 | 0.83 | 0.87 | 0.72 | 1.18 | 0.98 | 0.90 | 0.75 | 62.04  | 9.31  |
| D6RGQ0   | Complement factor H OS=Mus musculus GN=Cfh PE=2 SV=1 - [D6RGQ0_MOUSE]                                                           | 8.65  | 8  | 8  | 8  | 13  | 0.87 | 1.10 | 1.30 | 0.73 | 0.86 | 0.80 | 0.93 | 0.87 | 0.98 | 0.86 | 0.99 | 0.82 | 0.89 | 124.97 | 6.83  |
| O35864   | COP9 signalosome complex subunit 5 OS=Mus musculus GN=Cops5 PE=1 SV=3 - [CSN5_MOUSE]                                            | 34.73 | 1  | 8  | 8  | 22  | 0.91 | 0.95 | 0.98 | 0.93 | 0.96 | 0.84 | 0.95 | 0.87 | 1.07 | 0.88 | 1.04 | 0.85 | 0.92 | 37.52  | 6.54  |
| Q99K46   | Ubiquitin carboxyl-terminal hydrolase 11 OS=Mus musculus GN=Usp11 PE=2 SV=4 - [UBP11_MOUSE]                                     | 4.23  | 1  | 1  | 3  | 6   | 1.18 | 1.19 | 1.01 | 0.99 | 0.84 | 0.82 | 0.69 | 0.87 | 0.74 | 0.97 | 0.82 | 0.98 | 0.83 | 105.32 | 4.96  |
| E0CXE0   | Protein Grip2 OS=Mus musculus GN=Grip2 PE=2 SV=1 - [E0CXE0_MOUSE]                                                               | 0.97  | 3  | 1  | 1  | 1   | 0.90 | 1.02 | 1.13 | 1.02 | 1.13 | 0.86 | 0.95 | 0.87 | 0.97 | 0.82 | 0.91 | 0.89 | 0.99 | 88.00  | 7.01  |
| J3QK23   | Uncharacterized protein OS=Mus musculus GN=Gm9825 PE=4 SV=1 - [J3QK23_MOUSE]                                                    | 25.18 | 3  | 5  | 5  | 17  | 1.04 | 0.87 | 0.82 | 1.05 | 1.00 | 0.80 | 0.74 | 0.87 | 0.89 | 0.87 | 0.79 | 0.86 | 0.77 | 31.72  | 11.90 |
| Q3V117   | ATP-citrate synthase OS=Mus musculus GN=Acly PE=2 SV=1 - [Q3V117_MOUSE]                                                         | 43.51 | 3  | 36 | 36 | 106 | 0.97 | 1.02 | 1.07 | 1.06 | 1.09 | 0.91 | 0.90 | 0.87 | 0.90 | 0.97 | 1.02 | 1.06 | 1.11 | 120.72 | 7.44  |
| D6RGB9   | CUGBP Elav-like family member 6 OS=Mus musculus GN=Celf6 PE=2 SV=1 - [D6RGB9_MOUSE]                                             | 14.81 | 4  | 1  | 2  | 2   | 0.80 | 0.73 | 0.92 | 0.97 | 1.22 | 0.90 | 1.13 | 0.87 | 1.09 | 1.05 | 1.32 | 0.91 | 1.15 | 17.00  | 8.92  |
| Q9WVQ1   | Membrane-associated guanylate kinase, WW and PDZ domain-containing protein 2 OS=Mus musculus GN=Magi2 PE=1 SV=2 - [MAGI2_MOUSE] | 28.71 | 4  | 25 | 26 | 59  | 0.86 | 0.96 | 1.12 | 0.93 | 1.09 | 0.84 | 0.92 | 0.87 | 1.02 | 0.79 | 0.92 | 0.78 | 0.95 | 140.83 | 6.19  |
| O35963   | Ras-related protein Rab33B OS=Mus musculus GN=Rab33b PE=1 SV=1 - [RB33B_MOUSE]                                                  | 23.58 | 11 | 3  | 5  | 52  | 1.10 | 1.00 | 0.90 | 1.05 | 1.00 | 0.94 | 0.83 | 0.87 | 0.82 | 1.00 | 0.91 | 1.02 | 0.88 | 25.75  | 7.69  |
| P84089   | Enhancer of rudimentary homolog OS=Mus musculus GN=Erh PE=1 SV=1 - [ERH_MOUSE]                                                  | 44.23 | 3  | 5  | 5  | 36  | 0.95 | 0.70 | 0.76 | 0.89 | 0.94 | 0.85 | 0.94 | 0.87 | 0.91 | 0.80 | 0.82 | 0.72 | 0.83 | 12.25  | 5.92  |

|        |                                                                                                                       |       |    |    |    |      |      |      |      |      |      |      |      |      |      |      |      |      |      |        |       |
|--------|-----------------------------------------------------------------------------------------------------------------------|-------|----|----|----|------|------|------|------|------|------|------|------|------|------|------|------|------|------|--------|-------|
| D3YW9  | Contactin-associated protein-like 4 OS=Mus musculus GN=Ctnap4 PE=2 SV=1 - [D3YW9_MOUSE]                               | 4.66  | 2  | 5  | 5  | 7    | 1.02 | 1.13 | 1.09 | 0.99 | 0.95 | 0.94 | 0.88 | 0.87 | 0.86 | 0.97 | 0.96 | 1.07 | 1.02 | 144.67 | 7.02  |
| D3YVE6 | MCG18601 OS=Mus musculus GN=Rpl7a-ps10 PE=4 SV=1 - [D3YVE6_MOUSE]                                                     | 22.93 | 11 | 6  | 6  | 18   | 1.01 | 0.86 | 0.88 | 1.04 | 0.97 | 0.88 | 0.87 | 0.87 | 0.81 | 0.97 | 0.90 | 0.96 | 0.91 | 30.02  | 10.45 |
| A2AIX0 | 72 kDa inositol polyphosphate 5-phosphatase OS=Mus musculus GN=Inpp5e PE=4 SV=1 - [A2AIX0_MOUSE]                      | 1.49  | 2  | 1  | 1  | 2    | 0.94 | 1.12 | 1.19 | 1.01 | 1.08 | 0.82 | 0.86 | 0.87 | 0.92 | 1.10 | 1.17 | 1.14 | 1.22 | 67.23  | 9.07  |
| F7BQE4 | Rho guanine nucleotide exchange factor 10 (Fragment) OS=Mus musculus GN=Arhgef10 PE=2 SV=1 - [F7BQE4_MOUSE]           | 1.42  | 3  | 1  | 1  | 2    | 0.93 | 1.00 | 1.08 | 0.76 | 0.82 | 0.84 | 0.90 | 0.87 | 0.94 | 0.88 | 0.95 | 0.90 | 0.97 | 109.34 | 8.00  |
| D3YVW9 | Ankyrin repeat domain-containing protein 45 (Fragment) OS=Mus musculus GN=Ankr45 PE=2 SV=1 - [D3YVW9_MOUSE]           | 5.37  | 3  | 1  | 1  | 2    | 0.97 | 0.98 | 1.01 | 0.95 | 0.98 | 0.83 | 0.85 | 0.87 | 0.90 | 0.86 | 0.89 | 1.03 | 1.07 | 22.81  | 4.79  |
| G3X956 | FACT complex subunit SPT16 OS=Mus musculus GN=Supt16 PE=4 SV=1 - [G3X956_MOUSE]                                       | 7.45  | 2  | 7  | 7  | 15   | 1.05 | 1.11 | 0.99 | 1.02 | 0.98 | 0.93 | 0.89 | 0.87 | 0.87 | 0.90 | 0.83 | 1.02 | 0.97 | 119.76 | 5.66  |
| P31938 | Dual specificity mitogen-activated protein kinase kinase 1 OS=Mus musculus GN=Map2k1 PE=1 SV=2 - [MP2K1_MOUSE]        | 48.60 | 1  | 10 | 15 | 105  | 1.01 | 0.89 | 0.92 | 1.05 | 1.08 | 0.91 | 0.93 | 0.87 | 0.88 | 0.91 | 0.94 | 0.93 | 0.96 | 43.45  | 6.70  |
| P63101 | 14-3-3 protein zeta/delta OS=Mus musculus GN=Ywhaz PE=1 SV=1 - [1433Z_MOUSE]                                          | 85.31 | 7  | 19 | 28 | 1089 | 0.94 | 0.94 | 1.01 | 0.99 | 1.07 | 0.89 | 0.95 | 0.87 | 0.92 | 0.87 | 0.93 | 0.83 | 0.89 | 27.75  | 4.79  |
| Q8C436 | Protein-lysine methyltransferase METTL21D OS=Mus musculus GN=Mettl21d PE=2 SV=2 - [MT21D_MOUSE]                       | 3.07  | 1  | 1  | 1  | 1    | 0.86 | 0.84 | 0.98 | 0.95 | 1.10 | 0.86 | 1.00 | 0.87 | 1.01 | 0.81 | 0.94 | 0.90 | 1.05 | 25.52  | 4.73  |
| Q8BYC6 | Serine/threonine-protein kinase TAO3 OS=Mus musculus GN=Taok3 PE=1 SV=2 - [TAOK3_MOUSE]                               | 4.23  | 3  | 1  | 4  | 6    | 0.99 | 0.99 | 1.01 | 0.91 | 0.93 | 0.92 | 0.93 | 0.87 | 0.88 | 0.73 | 0.75 | 0.87 | 0.88 | 105.27 | 7.36  |
| Q922H2 | [Pyruvate dehydrogenase (lipoamide)] kinase isozyme 3, mitochondrial OS=Mus musculus GN=Pdk3 PE=2 SV=1 - [PDK3_MOUSE] | 20.96 | 1  | 5  | 6  | 17   | 1.01 | 1.08 | 1.00 | 1.04 | 1.03 | 1.00 | 0.96 | 0.87 | 0.89 | 0.92 | 0.96 | 1.08 | 1.04 | 47.89  | 8.82  |

|          |                                                                                                        |       |   |    |    |     |      |      |      |      |      |      |      |      |      |      |      |      |      |        |      |
|----------|--------------------------------------------------------------------------------------------------------|-------|---|----|----|-----|------|------|------|------|------|------|------|------|------|------|------|------|------|--------|------|
| P47239   | Paired box protein Pax-7 OS=Mus musculus GN=Pax7 PE=1 SV=2 - [PAX7_MOUSE]                              | 2.58  | 2 | 1  | 1  | 1   | 1.19 | 1.01 | 0.84 | 0.82 | 0.69 | 1.00 | 0.83 | 0.87 | 0.73 | 1.30 | 1.09 | 0.90 | 0.75 | 54.90  | 8.98 |
| Q80Y81-2 | Isoform 2 of Zinc phosphodiesterase ELAC protein 2 OS=Mus musculus GN=Elac2 - [RNZ2_MOUSE]             | 3.03  | 4 | 2  | 2  | 3   | 1.04 | 1.28 | 1.24 | 1.09 | 1.05 | 0.83 | 0.80 | 0.87 | 0.84 | 0.88 | 0.85 | 0.94 | 0.90 | 92.02  | 7.43 |
| D3Z2Q3   | Diablo homolog, mitochondrial OS=Mus musculus GN=Diablo PE=2 SV=1 - [D3Z2Q3_MOUSE]                     | 17.24 | 3 | 2  | 2  | 3   | 0.94 | 1.11 | 1.18 | 0.93 | 0.99 | 0.98 | 1.04 | 0.87 | 0.93 | 0.85 | 0.90 | 0.90 | 0.96 | 19.78  | 8.82 |
| Q0VE82   | Copine-7 OS=Mus musculus GN=Cpne7 PE=2 SV=1 - [CPNE7_MOUSE]                                            | 8.98  | 1 | 3  | 4  | 7   | 1.04 | 1.04 | 0.98 | 1.11 | 1.03 | 1.00 | 0.90 | 0.87 | 0.84 | 1.03 | 0.99 | 1.20 | 1.13 | 61.85  | 5.40 |
| Q9D061   | Acyl-CoA-binding domain-containing protein 6 OS=Mus musculus GN=Acbd6 PE=1 SV=2 - [ACBD6_MOUSE]        | 37.59 | 3 | 10 | 10 | 37  | 0.85 | 0.79 | 0.91 | 0.83 | 0.95 | 0.88 | 0.99 | 0.87 | 1.03 | 0.84 | 0.92 | 0.84 | 0.94 | 30.87  | 5.11 |
| E9PUM9   | Protein Nrnx2 OS=Mus musculus GN=Nrxn2 PE=2 SV=1 - [E9PUM9_MOUSE]                                      | 11.39 | 8 | 10 | 17 | 66  | 1.19 | 1.15 | 1.01 | 1.03 | 0.88 | 0.99 | 0.81 | 0.87 | 0.69 | 0.99 | 0.92 | 0.94 | 0.87 | 183.90 | 5.82 |
| Q8BI08   | Protein MAL2 OS=Mus musculus GN=Mal2 PE=1 SV=1 - [MAL2_MOUSE]                                          | 6.29  | 1 | 1  | 1  | 2   | 1.19 | 1.26 | 1.05 | 1.04 | 0.87 | 0.90 | 0.75 | 0.87 | 0.73 | 0.88 | 0.74 | 0.85 | 0.72 | 19.08  | 6.49 |
| D3Z3S1   | Prolactin regulatory element binding, isoform CRA_b OS=Mus musculus GN=Preb PE=4 SV=1 - [D3Z3S1_MOUSE] | 16.57 | 3 | 4  | 4  | 28  | 0.94 | 1.10 | 1.07 | 1.13 | 1.07 | 0.88 | 0.92 | 0.87 | 0.88 | 0.98 | 1.01 | 0.98 | 1.06 | 37.94  | 8.56 |
| Q4VAE3   | Transmembrane protein 65 OS=Mus musculus GN=Tmem65 PE=2 SV=1 - [TMM65_MOUSE]                           | 24.79 | 1 | 5  | 5  | 13  | 1.01 | 0.95 | 0.96 | 1.09 | 1.11 | 0.84 | 0.80 | 0.87 | 0.86 | 0.85 | 0.83 | 0.91 | 0.90 | 24.90  | 7.78 |
| Q9R190   | Metastasis-associated protein MTA2 OS=Mus musculus GN=Mta2 PE=1 SV=1 - [MTA2_MOUSE]                    | 8.53  | 1 | 5  | 5  | 9   | 0.90 | 0.91 | 0.99 | 1.04 | 1.12 | 0.98 | 1.10 | 0.87 | 0.98 | 0.90 | 0.99 | 1.09 | 1.16 | 74.98  | 9.67 |
| Q2PFD7-5 | Isoform 5 of PH and SEC7 domain-containing protein 3 OS=Mus musculus GN=Psd3 - [PSD3_MOUSE]            | 29.08 | 6 | 7  | 27 | 108 | 0.99 | 0.94 | 0.94 | 1.04 | 0.98 | 0.98 | 0.92 | 0.87 | 0.89 | 0.93 | 0.94 | 0.90 | 0.94 | 111.14 | 6.25 |
| E9Q7T7   | Protein Chadl OS=Mus musculus GN=Chadl PE=2 SV=1 - [E9Q7T7_MOUSE]                                      | 5.35  | 1 | 2  | 2  | 4   | 0.89 | 1.22 | 1.37 | 1.05 | 1.19 | 0.99 | 1.11 | 0.87 | 0.98 | 1.12 | 1.26 | 1.11 | 1.26 | 81.31  | 8.87 |

|          |                                                                                                                                      |       |   |   |    |    |      |      |      |      |      |      |      |      |      |      |      |      |      |        |        |      |
|----------|--------------------------------------------------------------------------------------------------------------------------------------|-------|---|---|----|----|------|------|------|------|------|------|------|------|------|------|------|------|------|--------|--------|------|
| Q61194-2 | Isoform 2 of Phosphatidylinositol 4-phosphate 3-kinase C2 domain-containing subunit alpha OS=Mus musculus GN=Pik3c2a - [P3C2A_MOUSE] | 0.48  | 3 | 1 | 1  | 1  | 1    | 1.03 | 0.99 | 0.96 | 0.94 | 0.91 | 0.99 | 0.96 | 0.87 | 0.85 | 0.96 | 0.93 | 0.92 | 0.90   | 187.41 | 8.24 |
| Q3UVU3   | Zinc transporter 10 OS=Mus musculus GN=Slc30a10 PE=1 SV=1 - [ZNT10_MOUSE]                                                            | 6.17  | 2 | 2 | 2  | 3  | 0.93 | 1.08 | 1.16 | 0.91 | 0.98 | 0.84 | 0.89 | 0.87 | 0.94 | 0.97 | 1.05 | 1.06 | 1.14 | 50.88  | 7.02   |      |
| B2RXC1   | Trafficking protein particle complex subunit 11 OS=Mus musculus GN=Trappc11 PE=2 SV=1 - [TPC11_MOUSE]                                | 7.06  | 1 | 5 | 5  | 7  | 0.93 | 1.03 | 0.95 | 1.03 | 1.04 | 0.90 | 0.95 | 0.87 | 0.93 | 0.91 | 0.83 | 0.89 | 0.92 | 128.31 | 7.58   |      |
| Q9D1E6   | Tubulin-folding cofactor B OS=Mus musculus GN=Tbcb PE=1 SV=2 - [TBCB_MOUSE]                                                          | 49.18 | 1 | 9 | 9  | 24 | 0.95 | 0.97 | 1.04 | 1.04 | 1.07 | 0.97 | 1.03 | 0.87 | 0.90 | 0.88 | 0.98 | 0.82 | 0.89 | 27.37  | 5.24   |      |
| Q60900   | ELAV-like protein 3 OS=Mus musculus GN=Elavl3 PE=1 SV=1 - [ELAV3_MOUSE]                                                              | 38.42 | 2 | 9 | 12 | 22 | 0.95 | 0.91 | 0.99 | 0.99 | 1.06 | 0.93 | 0.97 | 0.87 | 0.95 | 0.85 | 0.87 | 0.99 | 1.07 | 39.51  | 9.28   |      |
| Q8VDS3   | Chromobox protein homolog 7 OS=Mus musculus GN=Cbx7 PE=1 SV=1 - [CBX7_MOUSE]                                                         | 5.06  | 3 | 1 | 1  | 1  | 1.14 | 0.84 | 0.74 | 0.90 | 0.79 | 0.83 | 0.73 | 0.87 | 0.77 | 0.95 | 0.83 | 0.94 | 0.83 | 18.10  | 5.20   |      |
| Q3TDQ1   | Dolichyl-diphosphooligosaccharide--protein glycosyltransferase subunit STT3B OS=Mus musculus GN=Stt3b PE=1 SV=2 - [STT3B_MOUSE]      | 3.65  | 1 | 2 | 2  | 3  | 0.87 | 1.25 | 1.43 | 1.10 | 1.25 | 0.80 | 0.91 | 0.87 | 1.00 | 1.03 | 1.18 | 0.96 | 1.10 | 93.19  | 8.95   |      |
| F8WJG3   | Transformer-2 protein homolog beta OS=Mus musculus GN=Tra2b PE=2 SV=1 - [F8WJG3_MOUSE]                                               | 40.43 | 2 | 5 | 6  | 47 | 0.99 | 0.81 | 0.83 | 0.97 | 0.94 | 0.87 | 0.84 | 0.87 | 0.85 | 0.83 | 0.86 | 0.87 | 0.88 | 21.92  | 10.15  |      |
| Q8BH55   | Threonine synthase-like 1 OS=Mus musculus GN=Thns1 PE=2 SV=1 - [THNS1_MOUSE]                                                         | 16.47 | 2 | 9 | 9  | 19 | 1.00 | 1.07 | 1.03 | 1.11 | 1.08 | 0.92 | 0.90 | 0.87 | 0.85 | 0.94 | 0.96 | 0.99 | 0.95 | 83.05  | 7.20   |      |
| Q3U487   | E3 ubiquitin-protein ligase HECTD3 OS=Mus musculus GN=Hectd3 PE=1 SV=2 - [HECD3_MOUSE]                                               | 4.18  | 1 | 3 | 3  | 4  | 0.96 | 1.14 | 0.73 | 1.12 | 1.16 | 0.96 | 0.92 | 0.87 | 0.91 | 0.95 | 0.94 | 1.00 | 1.04 | 97.29  | 5.47   |      |
| P08414   | Calcium/calmodulin-dependent protein kinase type IV OS=Mus musculus GN=Camk4 PE=1 SV=2 - [KCC4_MOUSE]                                | 32.20 | 3 | 9 | 9  | 16 | 0.95 | 0.82 | 0.94 | 1.03 | 1.18 | 0.94 | 1.06 | 0.87 | 0.95 | 0.94 | 1.01 | 0.89 | 0.95 | 52.59  | 4.93   |      |

|          |                                                                                                         |       |   |    |    |    |      |      |      |      |      |      |      |      |      |      |      |      |      |        |       |
|----------|---------------------------------------------------------------------------------------------------------|-------|---|----|----|----|------|------|------|------|------|------|------|------|------|------|------|------|------|--------|-------|
| P83940   | Transcription elongation factor B polypeptide 1 OS=Mus musculus GN=Tceb1 PE=1 SV=1 - [ELOC_MOUSE]       | 48.21 | 1 | 4  | 4  | 15 | 0.92 | 1.00 | 1.19 | 1.00 | 1.07 | 0.87 | 1.00 | 0.88 | 0.88 | 0.89 | 0.93 | 0.97 | 1.03 | 12.46  | 4.78  |
| Q9D8E6   | 60S ribosomal protein L4 OS=Mus musculus GN=Rpl4 PE=1 SV=3 - [RL4_MOUSE]                                | 29.12 | 1 | 10 | 10 | 37 | 0.94 | 0.94 | 0.99 | 1.03 | 1.08 | 0.95 | 0.93 | 0.88 | 0.86 | 0.88 | 0.93 | 0.99 | 1.01 | 47.12  | 11.00 |
| Q6ZQ13   | Malectin OS=Mus musculus GN=Mlec PE=2 SV=2 - [MLEC_MOUSE]                                               | 6.19  | 2 | 2  | 2  | 7  | 1.03 | 0.84 | 0.78 | 1.12 | 1.05 | 0.81 | 0.81 | 0.88 | 0.77 | 0.92 | 0.77 | 0.81 | 0.88 | 32.32  | 6.05  |
| P70211-3 | Isoform B of Netrin receptor DCC OS=Mus musculus GN=Dcc - [DCC_MOUSE]                                   | 1.61  | 3 | 2  | 2  | 4  | 0.96 | 1.17 | 1.22 | 0.91 | 0.95 | 0.93 | 0.97 | 0.88 | 0.91 | 0.94 | 0.98 | 0.96 | 1.00 | 149.25 | 6.62  |
| P59108   | Copine-2 OS=Mus musculus GN=Cpne2 PE=2 SV=1 - [CPNE2_MOUSE]                                             | 6.93  | 1 | 2  | 3  | 6  | 1.08 | 1.18 | 1.08 | 0.94 | 0.86 | 0.85 | 0.78 | 0.88 | 0.80 | 0.92 | 0.85 | 1.05 | 0.97 | 61.00  | 5.96  |
| Q8CIE6   | Coatomer subunit alpha OS=Mus musculus GN=Copa PE=1 SV=2 - [COPA_MOUSE]                                 | 14.38 | 3 | 13 | 13 | 28 | 0.94 | 1.02 | 1.14 | 1.12 | 1.19 | 0.91 | 0.95 | 0.88 | 0.91 | 0.93 | 1.04 | 1.02 | 1.11 | 138.34 | 7.65  |
| Q80YA7   | Dipeptidyl peptidase 8 OS=Mus musculus GN=Dpp8 PE=1 SV=1 - [DPP8_MOUSE]                                 | 5.49  | 1 | 2  | 3  | 7  | 1.60 | 1.23 | 0.93 | 1.15 | 0.71 | 0.79 | 0.70 | 0.88 | 0.63 | 0.83 | 0.67 | 1.06 | 0.67 | 102.12 | 5.81  |
| Q8R313   | Exocyst complex component 6 OS=Mus musculus GN=Exoc6 PE=1 SV=2 - [EXOC6_MOUSE]                          | 2.24  | 2 | 1  | 1  | 2  | 1.03 | 1.16 | 1.13 | 1.06 | 1.04 | 0.92 | 0.89 | 0.88 | 0.85 | 0.97 | 0.95 | 0.94 | 0.91 | 93.02  | 6.15  |
| F8VQD7   | Receptor-type tyrosine-protein phosphatase gamma OS=Mus musculus GN=Ptprg PE=2 SV=1 - [F8VQD7_MOUSE]    | 4.37  | 4 | 5  | 5  | 9  | 1.08 | 1.06 | 1.03 | 1.09 | 1.05 | 0.92 | 0.83 | 0.88 | 0.82 | 0.84 | 0.92 | 0.91 | 0.91 | 161.19 | 6.37  |
| Q8BZB2   | Phosphopantothenyloxy steine decarboxylase OS=Mus musculus GN=Ppdc PE=2 SV=1 - [COAC_MOUSE]             | 38.24 | 1 | 5  | 5  | 10 | 1.07 | 1.07 | 1.00 | 0.92 | 0.88 | 0.91 | 0.86 | 0.88 | 0.81 | 0.91 | 0.84 | 0.79 | 0.81 | 22.33  | 6.52  |
| O35375-5 | Isoform B0 of Neuropilin-2 OS=Mus musculus GN=Nrp2 - [NRP2_MOUSE]                                       | 5.77  | 6 | 4  | 4  | 10 | 1.22 | 1.20 | 0.99 | 1.03 | 0.87 | 0.85 | 0.70 | 0.88 | 0.65 | 1.08 | 0.88 | 1.34 | 1.10 | 101.35 | 5.81  |
| Q8C080   | Sorting nexin-16 OS=Mus musculus GN=Snx16 PE=2 SV=2 - [SNX16_MOUSE]                                     | 22.38 | 2 | 6  | 6  | 15 | 0.98 | 0.90 | 1.01 | 0.92 | 0.98 | 0.83 | 0.89 | 0.88 | 0.89 | 0.85 | 0.89 | 0.91 | 0.96 | 38.79  | 5.21  |
| P16390   | Potassium voltage-gated channel subfamily A member 3 OS=Mus musculus GN=Kcna3 PE=2 SV=3 - [KCNA3_MOUSE] | 14.02 | 3 | 2  | 6  | 40 | 0.89 | 1.06 | 1.19 | 1.00 | 1.07 | 0.84 | 0.94 | 0.88 | 0.94 | 1.04 | 1.13 | 0.93 | 0.99 | 58.53  | 5.33  |

|          |                                                                                                                                       |       |   |    |    |     |      |      |      |      |      |      |      |      |      |      |      |      |      |        |      |
|----------|---------------------------------------------------------------------------------------------------------------------------------------|-------|---|----|----|-----|------|------|------|------|------|------|------|------|------|------|------|------|------|--------|------|
| Q80U40-2 | Isoform 2 of RIMS-binding protein 2<br>OS=Mus musculus<br>GN=Rimbp2 -<br>[RIMB2_MOUSE]                                                | 26.01 | 3 | 20 | 20 | 85  | 0.88 | 1.09 | 1.14 | 0.92 | 1.04 | 0.87 | 0.99 | 0.88 | 0.95 | 0.83 | 0.95 | 0.82 | 0.93 | 117.85 | 5.27 |
| Q8BH66   | Atlastin-1 OS=Mus musculus<br>GN=Atl1<br>PE=1 SV=1 -<br>[ATLA1_MOUSE]                                                                 | 37.46 | 1 | 18 | 19 | 49  | 0.96 | 1.02 | 1.02 | 1.11 | 1.16 | 0.90 | 0.96 | 0.88 | 0.92 | 0.95 | 1.04 | 0.91 | 0.99 | 63.34  | 6.49 |
| P46978   | Dolichyl-diphosphooligosaccharide-protein glycosyltransferase subunit STT3A<br>OS=Mus musculus<br>GN=Stt3a PE=1 SV=1<br>[STT3A_MOUSE] | 2.27  | 1 | 2  | 2  | 3   | 1.07 | 1.13 | 1.05 | 1.26 | 1.18 | 0.87 | 0.81 | 0.88 | 0.82 | 0.79 | 0.74 | 1.09 | 1.02 | 80.54  | 8.10 |
| E9Q9M5   | Ubiquitin carboxyl-terminal hydrolase<br>OS=Mus musculus<br>GN=Usp19 PE=2<br>SV=1 -<br>[E9Q9M5_MOUSE]                                 | 3.85  | 4 | 3  | 3  | 5   | 0.99 | 1.02 | 1.00 | 1.03 | 1.02 | 0.89 | 0.90 | 0.88 | 0.86 | 0.85 | 0.84 | 0.89 | 0.88 | 143.36 | 6.23 |
| Q8BPN8-  | Isoform 2 of DmX-like protein 2 OS=Mus musculus<br>GN=DmX2 -<br>[DMXL2_MOUSE]                                                         | 24.49 | 6 | 53 | 53 | 126 | 0.99 | 1.01 | 1.01 | 1.12 | 1.10 | 0.89 | 0.87 | 0.88 | 0.90 | 0.92 | 0.94 | 1.01 | 1.01 | 336.80 | 6.46 |
| Q91V12-2 | Isoform A of Cytosolic acyl coenzyme A thioester hydrolase<br>OS=Mus musculus<br>GN=Acof7 -<br>[BACH_MOUSE]                           | 44.97 | 5 | 13 | 13 | 50  | 1.04 | 0.99 | 0.92 | 1.06 | 1.00 | 0.92 | 0.85 | 0.88 | 0.88 | 0.93 | 0.90 | 1.00 | 0.99 | 37.53  | 7.52 |
| Q9JI59   | Junctional adhesion molecule B OS=Mus musculus<br>GN=Jam2<br>PE=1 SV=1 -<br>[JAM2_MOUSE]                                              | 10.40 | 2 | 3  | 3  | 4   | 0.95 | 0.97 | 1.21 | 1.07 | 1.13 | 0.93 | 1.19 | 0.88 | 0.96 | 0.97 | 0.97 | 0.99 | 0.96 | 33.03  | 8.40 |
| Q3TYA6   | M-phase phosphoprotein 8<br>OS=Mus musculus<br>GN=Mphosph8 PE=1<br>SV=1 -<br>[MPP8_MOUSE]                                             | 6.18  | 1 | 3  | 3  | 8   | 0.98 | 0.98 | 1.00 | 0.90 | 0.90 | 1.06 | 1.16 | 0.88 | 0.87 | 1.08 | 1.22 | 0.92 | 0.92 | 97.41  | 5.85 |
| Q5SSH7-2 | Isoform 2 of Zinc finger ZZ-type and EF-hand domain-containing protein 1<br>OS=Mus musculus<br>GN=Zzef1 -<br>[ZZEF1_MOUSE]            | 1.04  | 3 | 2  | 2  | 8   | 0.93 | 1.21 | 1.38 | 1.11 | 1.22 | 0.87 | 0.89 | 0.88 | 0.92 | 0.95 | 0.98 | 1.00 | 1.03 | 324.23 | 6.07 |
| G3UZW7   | Protein mago nashi homolog 2 OS=Mus musculus<br>GN=Magohb<br>PE=2 SV=1 -<br>[G3UZW7_MOUSE]                                            | 26.47 | 4 | 2  | 2  | 2   | 0.91 | 0.66 | 0.73 | 0.82 | 0.90 | 0.76 | 0.83 | 0.88 | 0.96 | 0.79 | 0.87 | 0.85 | 0.93 | 11.79  | 5.52 |
| Q9EP84   | G protein-coupled receptor kinase 6<br>OS=Mus musculus<br>GN=Grk6 PE=2 SV=1<br>[Q9EP84_MOUSE]                                         | 1.61  | 3 | 1  | 1  | 5   | 0.89 | 1.03 | 1.15 | 1.09 | 1.21 | 0.98 | 1.10 | 0.88 | 0.98 | 0.99 | 1.13 | 0.99 | 1.11 | 64.24  | 8.53 |

|          |                                                                                                                            |       |    |    |    |     |      |      |      |      |      |      |      |      |      |      |      |      |      |        |       |
|----------|----------------------------------------------------------------------------------------------------------------------------|-------|----|----|----|-----|------|------|------|------|------|------|------|------|------|------|------|------|------|--------|-------|
| Q9D154   | Leukocyte elastase inhibitor A OS=Mus musculus GN=Serp1b1a PE=1 SV=1 - [ILEUA_MOUSE]                                       | 31.93 | 7  | 11 | 11 | 20  | 1.08 | 0.92 | 0.90 | 1.06 | 1.05 | 0.95 | 0.89 | 0.88 | 0.81 | 0.94 | 0.93 | 0.99 | 0.93 | 42.55  | 6.21  |
| P41105   | 60S ribosomal protein L28 OS=Mus musculus GN=Rpl28 PE=1 SV=2 - [RL28_MOUSE]                                                | 20.44 | 1  | 4  | 4  | 7   | 1.02 | 0.90 | 0.91 | 1.02 | 1.01 | 0.94 | 0.90 | 0.88 | 0.86 | 0.98 | 0.91 | 1.05 | 0.97 | 15.72  | 12.02 |
| Q91WT9   | Isoform 2 of Cystathionine beta-synthase OS=Mus musculus GN=Cbs - [CBS_MOUSE]                                              | 7.13  | 2  | 3  | 3  | 4   | 0.98 | 1.23 | 1.25 | 1.05 | 1.05 | 1.12 | 1.14 | 0.88 | 1.00 | 0.81 | 0.81 | 0.93 | 0.98 | 60.15  | 6.61  |
| Q9D1N9   | 39S ribosomal protein L21, mitochondrial OS=Mus musculus GN=Mrpl21 PE=2 SV=1 - [RM21_MOUSE]                                | 14.83 | 2  | 2  | 2  | 4   | 0.98 | 0.90 | 0.91 | 0.88 | 0.89 | 0.85 | 0.86 | 0.88 | 0.89 | 0.89 | 0.91 | 0.95 | 0.97 | 23.35  | 9.99  |
| Q8BZZ3   | NEDD4-like E3 ubiquitin-protein ligase WWP1 OS=Mus musculus GN=Wwp1 PE=1 SV=2 - [WWP1_MOUSE]                               | 3.05  | 1  | 1  | 1  | 2   | 1.08 | 0.99 | 0.92 | 1.32 | 1.23 | 0.92 | 0.85 | 0.88 | 0.81 | 1.29 | 1.20 | 1.13 | 1.05 | 104.63 | 6.38  |
| Q9WV91   | Prostaglandin F2 receptor negative regulator OS=Mus musculus GN=Ptgfrn PE=1 SV=2 - [FPRP_MOUSE]                            | 8.19  | 1  | 5  | 5  | 7   | 0.97 | 1.01 | 1.04 | 1.07 | 1.14 | 1.05 | 0.97 | 0.88 | 0.93 | 0.85 | 0.90 | 0.98 | 1.07 | 98.66  | 6.61  |
| P50171   | Estradiol 17-beta-dehydrogenase 8 OS=Mus musculus GN=Hsd17b8 PE=1 SV=2 - [DHB8_MOUSE]                                      | 15.83 | 3  | 3  | 3  | 8   | 0.97 | 1.13 | 1.13 | 1.01 | 1.02 | 0.85 | 0.89 | 0.88 | 0.87 | 0.96 | 1.01 | 1.03 | 1.04 | 26.57  | 6.54  |
| Q9CQA3   | Succinate dehydrogenase [ubiquinone] iron-sulfur subunit, mitochondrial OS=Mus musculus GN=Sdhb PE=1 SV=1 - [DHSB_MOUSE]   | 43.62 | 2  | 13 | 13 | 72  | 0.91 | 0.83 | 0.87 | 0.91 | 0.93 | 0.84 | 0.90 | 0.88 | 0.92 | 0.85 | 0.89 | 0.87 | 0.93 | 31.79  | 8.68  |
| Q8BJU0-2 | Isoform 2 of Small glutamine-rich tetratricopeptide repeat-containing protein alpha OS=Mus musculus GN=Sgta - [SGTA_MOUSE] | 29.62 | 2  | 9  | 9  | 37  | 0.85 | 0.76 | 0.81 | 0.85 | 0.98 | 0.82 | 0.93 | 0.88 | 0.98 | 0.83 | 0.95 | 0.75 | 0.86 | 34.17  | 5.06  |
| P97318-8 | Isoform DAB553 of Disabled homolog 1 OS=Mus musculus GN=Dab1 - [DAB1_MOUSE]                                                | 6.69  | 9  | 3  | 3  | 6   | 0.97 | 1.29 | 1.30 | 0.94 | 0.98 | 0.81 | 0.81 | 0.88 | 0.89 | 0.75 | 0.80 | 0.86 | 0.88 | 59.38  | 5.36  |
| D3YZ62   | Unconventional myosin Va OS=Mus musculus GN=Myo5a PE=2 SV=1 - [D3YZ62_MOUSE]                                               | 37.09 | 12 | 56 | 61 | 142 | 0.92 | 0.96 | 1.04 | 1.11 | 1.18 | 0.92 | 0.95 | 0.88 | 0.95 | 0.98 | 1.02 | 1.02 | 1.10 | 212.20 | 8.62  |
| D3Z3R1   | 60S ribosomal protein L36 OS=Mus musculus GN=Gm5745 PE=3 SV=1 - [D3Z3R1_MOUSE]                                             | 30.77 | 5  | 4  | 4  | 8   | 1.00 | 0.92 | 0.91 | 1.15 | 1.24 | 1.18 | 1.17 | 0.88 | 1.01 | 1.13 | 1.20 | 1.01 | 0.99 | 12.12  | 11.36 |

|          |                                                                                                                                                        |       |    |    |    |     |      |       |      |      |      |      |      |      |      |      |      |      |      |        |       |
|----------|--------------------------------------------------------------------------------------------------------------------------------------------------------|-------|----|----|----|-----|------|-------|------|------|------|------|------|------|------|------|------|------|------|--------|-------|
| P70168   | Importin subunit beta-1<br>OS=Mus musculus<br>GN=Kpnb1 PE=1<br>SV=2 -<br>[IMB1_MOUSE]                                                                  | 23.06 | 1  | 15 | 15 | 30  | 0.97 | 1.04  | 1.10 | 1.11 | 1.08 | 0.93 | 0.90 | 0.88 | 0.88 | 0.97 | 1.03 | 1.00 | 1.04 | 97.12  | 4.78  |
| P47757   | F-actin-capping protein<br>subunit beta OS=Mus<br>musculus GN=Capzb<br>PE=1 SV=3 -<br>[CAPZB_MOUSE]                                                    | 54.15 | 4  | 1  | 15 | 111 | 0.77 | 1.00  | 1.30 | 0.71 | 0.92 | 0.81 | 1.05 | 0.88 | 1.14 | 0.86 | 1.12 | 0.94 | 1.22 | 31.33  | 5.74  |
| O54734   | Dolichyl-<br>diphosphooligosacchari<br>de-protein<br>glycosyltransferase 48<br>kDa subunit OS=Mus<br>musculus GN=Ddost<br>PE=1 SV=2 -<br>[OST48_MOUSE] | 22.90 | 1  | 6  | 6  | 22  | 1.00 | 1.14  | 1.20 | 1.11 | 1.04 | 0.86 | 0.86 | 0.88 | 0.86 | 0.88 | 0.89 | 1.00 | 1.01 | 49.00  | 5.83  |
| Q9D7S7-2 | Isoform 2 of 60S<br>ribosomal protein L22-<br>like 1 OS=Mus<br>musculus GN=Rpl2211<br>- [RL22L_MOUSE]                                                  | 29.75 | 2  | 2  | 2  | 7   | 1.09 | 1.21  | 1.09 | 0.94 | 0.90 | 0.70 | 0.62 | 0.88 | 0.78 | 0.81 | 0.85 | 0.98 | 0.98 | 14.33  | 9.45  |
| Q9D0F3   | Protein ERGIC-53<br>OS=Mus musculus<br>GN=Lman1 PE=2<br>SV=1 -<br>[LMAN1_MOUSE]                                                                        | 12.19 | 1  | 4  | 4  | 6   | 1.05 | 1.31  | 1.33 | 0.98 | 0.91 | 0.88 | 0.83 | 0.88 | 0.84 | 0.86 | 0.82 | 0.76 | 0.72 | 57.75  | 6.34  |
| F6VQ81   | Tumor protein D54<br>(Fragment) OS=Mus<br>musculus GN=Tpd5212<br>PE=4 SV=1 -<br>[F6VQ81_MOUSE]                                                         | 69.57 | 1  | 1  | 11 | 61  | 1.06 | 0.97  | 0.91 | 0.69 | 0.66 | 1.03 | 0.97 | 0.88 | 0.83 | 0.88 | 0.83 | 0.73 | 0.69 | 17.72  | 8.19  |
| Q9CQL4   | 39S ribosomal protein<br>L20, mitochondrial<br>OS=Mus musculus<br>GN=Mrlp20 PE=1<br>SV=1 -<br>[RM20_MOUSE]                                             | 8.72  | 1  | 1  | 1  | 1   | 5.20 | 27.70 | 5.32 | 1.04 | 0.20 | 1.40 | 0.27 | 0.88 | 0.17 | 0.95 | 0.18 | 0.93 | 0.18 | 17.58  | 11.11 |
| Q9WTS2   | Alpha-(1,6)-<br>fucosyltransferase<br>OS=Mus musculus<br>GN=Fut8 PE=2 SV=2 -<br>[FUT8_MOUSE]                                                           | 1.39  | 1  | 1  | 1  | 1   | 1.02 | 1.17  | 1.15 | 1.20 | 1.18 | 0.87 | 0.85 | 0.88 | 0.86 | 0.97 | 0.95 | 0.93 | 0.91 | 66.52  | 7.52  |
| Q64487-5 | Isoform E of Receptor-<br>type tyrosine-protein<br>phosphatase delta<br>OS=Mus musculus<br>GN=Ptpd -<br>[PTPRD_MOUSE]                                  | 34.01 | 18 | 2  | 43 | 146 | 1.05 | 1.15  | 1.09 | 1.00 | 0.89 | 0.88 | 0.83 | 0.88 | 0.83 | 0.76 | 0.74 | 0.75 | 0.72 | 213.75 | 6.60  |
| Q8JZM0   | Dimethyladenosine<br>transferase 1,<br>mitochondrial OS=Mus<br>musculus GN=Tfb1m<br>PE=2 SV=1 -<br>[TFB1M_MOUSE]                                       | 2.61  | 1  | 1  | 1  | 2   | 1.01 | 1.46  | 1.44 | 1.10 | 1.09 | 0.84 | 0.83 | 0.88 | 0.86 | 0.97 | 0.95 | 1.09 | 1.08 | 38.94  | 9.47  |
| F6WDS8   | Regulator of G-protein-<br>signaling 6 OS=Mus<br>musculus GN=Rgs6<br>PE=4 SV=1 -<br>[F6WDS8_MOUSE]                                                     | 54.17 | 3  | 13 | 16 | 35  | 0.90 | 0.91  | 1.01 | 1.05 | 1.13 | 0.94 | 1.02 | 0.88 | 1.02 | 0.93 | 0.95 | 0.96 | 1.04 | 52.88  | 6.67  |
| Q9CZC8   | Secernin-1 OS=Mus<br>musculus GN=Scrn1<br>PE=1 SV=1 -<br>[SCRN1_MOUSE]                                                                                 | 58.94 | 2  | 19 | 19 | 217 | 0.85 | 0.83  | 1.01 | 0.82 | 0.95 | 0.79 | 0.92 | 0.88 | 0.98 | 0.75 | 0.89 | 0.77 | 0.92 | 46.30  | 4.79  |



|          |                                                                                                                           |       |   |    |    |    |      |      |      |      |      |      |      |      |      |      |      |      |      |        |      |
|----------|---------------------------------------------------------------------------------------------------------------------------|-------|---|----|----|----|------|------|------|------|------|------|------|------|------|------|------|------|------|--------|------|
| Q2TPA8   | Hydroxysteroid dehydrogenase-like protein 2 OS=Mus musculus GN=Hsd12 PE=2 SV=1 - [HSDL2_MOUSE]                            | 13.27 | 2 | 4  | 4  | 12 | 0.98 | 0.80 | 0.86 | 1.04 | 1.12 | 0.96 | 1.00 | 0.88 | 0.87 | 0.95 | 1.00 | 0.97 | 1.02 | 54.17  | 6.74 |
| Q91YQ5   | Dolichyl-diphosphooligosaccharide--protein glycosyltransferase subunit 1 OS=Mus musculus GN=Rpn1 PE=2 SV=1 - [RPN1_MOUSE] | 20.89 | 1 | 11 | 11 | 25 | 1.01 | 1.14 | 1.08 | 1.14 | 1.09 | 0.84 | 0.86 | 0.88 | 0.82 | 0.98 | 0.92 | 0.95 | 0.93 | 68.49  | 6.46 |
| Q61508-2 | Isoform Short of Extracellular matrix protein 1 OS=Mus musculus GN=Ecm1 - [ECM1_MOUSE]                                    | 3.23  | 3 | 1  | 1  | 2  | 0.74 | 0.93 | 1.25 | 0.84 | 1.14 | 0.95 | 1.28 | 0.88 | 1.18 | 1.05 | 1.41 | 1.06 | 1.44 | 48.33  | 6.07 |
| Q3UUG6   | Isoform 2 of TBC1 domain family member 24 OS=Mus musculus GN=Tbc1d24 - [TBC24_MOUSE]                                      | 11.35 | 2 | 6  | 6  | 13 | 1.01 | 0.99 | 1.07 | 1.06 | 1.12 | 0.97 | 0.92 | 0.88 | 0.91 | 0.97 | 0.91 | 1.02 | 1.04 | 62.59  | 7.11 |
| Q62383   | Transcription elongation factor SPT6 OS=Mus musculus GN=Supt6h PE=1 SV=2 - [SPT6H_MOUSE]                                  | 0.52  | 1 | 1  | 1  | 2  | 0.93 | 1.31 | 1.40 | 0.93 | 1.00 | 0.92 | 0.98 | 0.88 | 0.94 | 0.96 | 1.03 | 1.10 | 1.18 | 198.96 | 4.93 |
| Q9EQ08   | Heparan N-sulfatase OS=Mus musculus GN=Sgsh PE=2 SV=1 - [Q9EQ08_MOUSE]                                                    | 12.55 | 2 | 4  | 4  | 8  | 1.10 | 1.04 | 0.94 | 0.81 | 0.74 | 0.78 | 0.72 | 0.88 | 0.77 | 0.92 | 0.83 | 0.86 | 0.80 | 56.69  | 6.37 |
| A6PWC3   | Nardilysin OS=Mus musculus GN=Nrd1 PE=2 SV=1 - [A6PWC3_MOUSE]                                                             | 10.92 | 4 | 9  | 9  | 24 | 1.08 | 1.16 | 1.07 | 0.97 | 0.97 | 0.97 | 0.94 | 0.88 | 0.92 | 0.91 | 0.89 | 0.92 | 0.92 | 127.69 | 4.87 |
| D3YTT4   | Isobutyryl-CoA dehydrogenase, mitochondrial OS=Mus musculus GN=Acad8 PE=2 SV=1 - [D3YTT4_MOUSE]                           | 13.56 | 2 | 5  | 5  | 8  | 0.89 | 1.11 | 1.34 | 0.78 | 0.93 | 0.91 | 0.86 | 0.88 | 0.91 | 1.02 | 1.08 | 0.90 | 0.99 | 45.05  | 8.02 |
| Q9QXK3   | Isoform 4 of Coatomer subunit gamma-2 OS=Mus musculus GN=Copg2 - [COPG2_MOUSE]                                            | 10.11 | 7 | 6  | 8  | 14 | 0.91 | 1.08 | 1.14 | 1.09 | 1.17 | 0.92 | 0.98 | 0.88 | 0.96 | 0.97 | 1.08 | 0.97 | 1.00 | 97.49  | 5.86 |
| O55382   | Exocyst complex component 4 OS=Mus musculus GN=Exoc4 PE=1 SV=2 - [EXOC4_MOUSE]                                            | 15.90 | 3 | 11 | 11 | 27 | 0.94 | 1.12 | 1.28 | 1.08 | 1.20 | 0.88 | 0.91 | 0.88 | 0.96 | 0.97 | 1.02 | 0.99 | 1.07 | 110.48 | 6.49 |
| Q5SUR0   | Phosphoribosylformylglycinamide synthase OS=Mus musculus GN=Pfss PE=2 SV=1 - [PUR4_MOUSE]                                 | 12.49 | 3 | 8  | 8  | 19 | 1.08 | 1.00 | 1.05 | 1.03 | 0.99 | 0.99 | 0.97 | 0.88 | 0.89 | 0.99 | 1.03 | 1.07 | 0.97 | 144.54 | 5.67 |

|          |                                                                                                                    |       |   |    |    |    |      |      |      |      |      |      |      |      |      |      |      |      |      |        |       |
|----------|--------------------------------------------------------------------------------------------------------------------|-------|---|----|----|----|------|------|------|------|------|------|------|------|------|------|------|------|------|--------|-------|
| Q3UVW2   | Gamma-aminobutyric acid receptor subunit gamma-2 OS=Mus musculus GN=Gabrg2 PE=2 SV=1 - [Q3UVW2_MOUSE]              | 9.66  | 4 | 3  | 3  | 5  | 0.98 | 0.89 | 0.91 | 1.06 | 1.09 | 0.84 | 0.86 | 0.88 | 0.90 | 0.83 | 0.90 | 0.91 | 0.90 | 51.77  | 8.37  |
| Q6ZPQ6-2 | Isoform 2 of Membrane associated phosphatidylinositol transfer protein 2 OS=Mus musculus GN=Pitpm2 - [PITM2_MOUSE] | 14.52 | 3 | 13 | 13 | 22 | 0.94 | 1.03 | 1.13 | 1.03 | 1.09 | 0.90 | 0.94 | 0.88 | 0.93 | 0.91 | 1.01 | 0.93 | 1.03 | 142.20 | 7.71  |
| Q9Z204-2 | Isoform C1 of Heterogeneous nuclear ribonucleoproteins C1/C2 OS=Mus musculus GN=Hnrpc - [HNRPC_MOUSE]              | 44.00 | 3 | 1  | 10 | 45 | 0.88 | 0.94 | 1.02 | 0.85 | 0.96 | 0.88 | 1.05 | 0.88 | 1.08 | 0.93 | 1.15 | 0.92 | 1.07 | 33.04  | 5.03  |
| P56399   | Ubiquitin carboxyl-terminal hydrolase 5 OS=Mus musculus GN=Usp5 PE=1 SV=1 - [UBP5_MOUSE]                           | 50.82 | 4 | 34 | 34 | 96 | 0.95 | 0.93 | 0.94 | 1.10 | 1.11 | 0.95 | 0.94 | 0.88 | 0.93 | 0.95 | 1.00 | 0.95 | 0.98 | 95.77  | 5.01  |
| O35450   | FK506-binding protein-like OS=Mus musculus GN=Fkbp1 PE=2 SV=1 - [FKBPL_MOUSE]                                      | 2.88  | 1 | 1  | 1  | 1  | 0.98 | 0.87 | 0.89 | 1.04 | 1.05 | 0.85 | 0.86 | 0.88 | 0.89 | 0.93 | 0.95 | 0.90 | 0.91 | 38.28  | 7.74  |
| E9Q7E1   | Coiled-coil domain-containing protein 150 OS=Mus musculus GN=Ccdc150 PE=2 SV=1 - [E9Q7E1_MOUSE]                    | 6.03  | 4 | 1  | 2  | 4  | 0.79 | 0.80 | 1.02 | 0.98 | 1.24 | 0.79 | 1.00 | 0.88 | 1.11 | 0.79 | 1.00 | 0.93 | 1.18 | 66.26  | 5.81  |
| A2A4I8   | Membrane primary amine oxidase (Fragment) OS=Mus musculus GN=Aoc3 PE=2 SV=1 - [A2A4I8_MOUSE]                       | 2.55  | 3 | 1  | 1  | 2  | 0.93 | 1.15 | 1.24 | 0.88 | 0.95 | 0.78 | 0.84 | 0.88 | 0.95 | 0.92 | 0.99 | 0.74 | 0.80 | 52.82  | 5.63  |
| B1B1D8   | 39S ribosomal protein L2, mitochondrial OS=Mus musculus GN=Mrlp2 PE=2 SV=1 - [B1B1D8_MOUSE]                        | 13.49 | 2 | 2  | 2  | 4  | 0.91 | 1.06 | 1.17 | 0.82 | 0.90 | 0.90 | 0.99 | 0.88 | 0.97 | 0.79 | 0.87 | 0.96 | 1.06 | 33.08  | 11.06 |
| Q9WVJ2   | 26S proteasome non-ATPase regulatory subunit 13 OS=Mus musculus GN=Psm13 PE=1 SV=1 - [PSD13_MOUSE]                 | 14.89 | 5 | 4  | 4  | 9  | 1.08 | 0.95 | 0.88 | 1.20 | 1.02 | 0.92 | 0.86 | 0.88 | 0.79 | 1.00 | 0.88 | 1.18 | 1.20 | 42.78  | 5.71  |
| P59279   | Ras-related protein Rab 2B OS=Mus musculus GN=Rab2b PE=2 SV=1 - [RAB2B_MOUSE]                                      | 53.70 | 4 | 4  | 11 | 60 | 0.96 | 1.03 | 0.82 | 1.17 | 1.09 | 0.90 | 0.97 | 0.88 | 0.92 | 0.93 | 0.89 | 0.93 | 0.97 | 24.18  | 6.68  |

|         |                                                                                                                               |       |    |    |    |     |      |      |      |      |      |      |      |      |      |      |      |      |      |       |      |
|---------|-------------------------------------------------------------------------------------------------------------------------------|-------|----|----|----|-----|------|------|------|------|------|------|------|------|------|------|------|------|------|-------|------|
| Q6ZQK5- | Isoform 2 of Arf-GAP with coiled-coil, ANK repeat and PH domain-containing protein 2 OS=Mus musculus GN=Acap2 - [ACAP2_MOUSE] | 9.57  | 2  | 6  | 7  | 10  | 0.99 | 0.95 | 1.02 | 1.00 | 1.02 | 0.87 | 0.92 | 0.88 | 0.92 | 0.87 | 0.92 | 0.90 | 0.94 | 85.08 | 6.73 |
| E9Q912  | Protein Rap1gds1 OS=Mus musculus GN=Rap1gds1 PE=2 SV=1 - [E9Q912_MOUSE]                                                       | 42.50 | 2  | 20 | 20 | 59  | 0.97 | 0.93 | 0.96 | 1.09 | 1.15 | 0.90 | 0.93 | 0.88 | 0.91 | 0.94 | 1.03 | 1.01 | 1.04 | 66.03 | 5.35 |
| Q91V41  | Ras-related protein Rab14 OS=Mus musculus GN=Rab14 PE=1 SV=3 - [RAB14_MOUSE]                                                  | 71.16 | 12 | 12 | 14 | 111 | 1.01 | 1.00 | 0.98 | 1.13 | 1.11 | 0.90 | 0.87 | 0.88 | 0.85 | 0.97 | 0.92 | 0.92 | 0.93 | 23.88 | 6.21 |
| Q7TSY6- | Isoform 4 of CUGBP Elav-like family member 4 OS=Mus musculus GN=Celf4 - [CELF4_MOUSE]                                         | 9.87  | 7  | 2  | 4  | 7   | 0.92 | 0.87 | 0.95 | 0.84 | 0.92 | 0.86 | 0.93 | 0.88 | 0.95 | 0.95 | 1.04 | 1.03 | 1.12 | 48.52 | 8.78 |
| E0CY63  | Claudin domain-containing protein 1 (Fragment) OS=Mus musculus GN=Cldn25 PE=2 SV=1 - [E0CY63_MOUSE]                           | 18.70 | 3  | 2  | 2  | 4   | 1.05 | 1.12 | 1.06 | 1.03 | 0.98 | 0.88 | 0.83 | 0.88 | 0.83 | 0.90 | 0.85 | 0.98 | 0.93 | 14.29 | 4.70 |
| Q04899  | Cyclin-dependent kinase 18 OS=Mus musculus GN=Cdk18 PE=1 SV=1 - [CDK18_MOUSE]                                                 | 15.08 | 49 | 1  | 6  | 13  | 1.20 | 1.85 | 1.54 | 1.28 | 1.06 | 1.34 | 1.11 | 0.88 | 0.73 | 1.30 | 1.08 | 1.57 | 1.31 | 51.81 | 8.51 |
| P28651  | Carbonic anhydrase-related protein OS=Mus musculus GN=Ca8 PE=1 SV=5 - [CAH8_MOUSE]                                            | 8.59  | 1  | 1  | 1  | 2   | 1.00 | 2.46 | 2.45 | 1.21 | 1.20 | 1.36 | 1.35 | 0.88 | 0.87 | 1.07 | 1.07 | 1.10 | 1.10 | 33.06 | 4.78 |
| Q8BFV7  | Gamma-secretase subunit APH-1A OS=Mus musculus GN=Aph1a PE=2 SV=2 - [APH1A_MOUSE]                                             | 3.02  | 1  | 1  | 1  | 1   | 1.56 | 1.65 | 1.05 | 1.43 | 0.91 | 0.98 | 0.63 | 0.88 | 0.56 | 1.22 | 0.78 | 1.11 | 0.71 | 28.97 | 7.90 |
| D3Z4N1  | Rhotekin (Fragment) OS=Mus musculus GN=Rtkn PE=2 SV=1 - [D3Z4N1_MOUSE]                                                        | 7.83  | 3  | 1  | 2  | 4   | 0.89 | 0.79 | 0.89 | 0.87 | 0.98 | 0.84 | 0.94 | 0.88 | 0.99 | 0.72 | 0.81 | 0.97 | 1.09 | 24.03 | 6.35 |
| O35066  | Kinesin-like protein KIF3C OS=Mus musculus GN=Kif3c PE=2 SV=3 - [KIF3C_MOUSE]                                                 | 11.81 | 1  | 3  | 7  | 12  | 1.01 | 1.03 | 1.01 | 0.97 | 0.96 | 0.96 | 0.94 | 0.88 | 0.87 | 1.01 | 0.99 | 0.98 | 0.96 | 89.92 | 8.06 |
| P60764  | Ras-related C3 botulinum toxin substrate 3 OS=Mus musculus GN=Rac3 PE=1 SV=1 - [RAC3_MOUSE]                                   | 23.96 | 9  | 1  | 5  | 24  | 1.15 | 1.16 | 1.02 | 1.20 | 1.10 | 1.03 | 0.89 | 0.88 | 0.82 | 1.10 | 1.02 | 1.17 | 1.05 | 21.37 | 8.15 |

|        |                                                                                                    |       |   |    |    |     |      |      |      |      |      |      |      |      |      |      |      |      |      |        |       |
|--------|----------------------------------------------------------------------------------------------------|-------|---|----|----|-----|------|------|------|------|------|------|------|------|------|------|------|------|------|--------|-------|
| Q9DC61 | Mitochondrial-processing peptidase subunit alpha OS=Mus musculus GN=Pmpca PE=1 SV=1 - [MPPA_MOUSE] | 21.37 | 2 | 7  | 7  | 15  | 0.89 | 0.86 | 0.99 | 0.96 | 1.11 | 0.93 | 1.01 | 0.88 | 1.04 | 1.01 | 1.15 | 0.99 | 1.15 | 58.24  | 6.83  |
| P35278 | Ras-related protein Rab5C OS=Mus musculus GN=Rab5c PE=1 SV=2 - [RAB5C_MOUSE]                       | 48.15 | 3 | 4  | 7  | 53  | 0.99 | 1.10 | 1.09 | 0.98 | 0.99 | 0.85 | 0.80 | 0.88 | 0.80 | 0.87 | 0.83 | 0.82 | 0.77 | 23.40  | 8.41  |
| Q8BHW2 | Protein OSCP1 OS=Mus musculus GN=Oscp1 PE=2 SV=1 - [OSCP1_MOUSE]                                   | 14.78 | 1 | 6  | 6  | 11  | 1.11 | 0.96 | 1.15 | 1.00 | 1.01 | 0.93 | 0.83 | 0.88 | 0.86 | 0.98 | 0.92 | 1.05 | 1.12 | 43.20  | 7.20  |
| Q8VHM5 | Heterogeneous nuclear ribonucleoprotein R OS=Mus musculus GN=Hnrnp PE=2 SV=1 - [Q8VHM5_MOUSE]      | 41.46 | 4 | 19 | 24 | 104 | 0.95 | 0.77 | 0.81 | 0.92 | 0.96 | 0.88 | 0.91 | 0.88 | 0.93 | 0.83 | 0.86 | 0.79 | 0.83 | 70.84  | 8.13  |
| Q8CI94 | Glycogen phosphorylase, brain form OS=Mus musculus GN=Pygb PE=1 SV=3 - [PYGB_MOUSE]                | 51.36 | 1 | 28 | 37 | 171 | 1.06 | 1.04 | 0.96 | 1.13 | 1.05 | 0.89 | 0.85 | 0.88 | 0.82 | 0.97 | 0.89 | 1.07 | 1.01 | 96.67  | 6.73  |
| P20934 | Protein EVI2A OS=Mus musculus GN=Evi2a PE=1 SV=2 - [EVI2A_MOUSE]                                   | 8.97  | 1 | 1  | 1  | 1   | 0.86 | 1.00 | 1.16 | 0.81 | 0.93 | 0.69 | 0.79 | 0.88 | 1.02 | 0.89 | 1.03 | 0.98 | 1.14 | 24.07  | 9.52  |
| D3Z495 | Protein spire homolog 1 OS=Mus musculus GN=Spire1 PE=2 SV=1 - [D3Z495_MOUSE]                       | 11.46 | 8 | 4  | 5  | 8   | 1.05 | 0.76 | 0.72 | 1.09 | 1.03 | 0.88 | 0.91 | 0.88 | 0.94 | 0.97 | 0.96 | 1.02 | 1.07 | 59.35  | 9.52  |
| Q7TMC8 | L-fucose kinase OS=Mus musculus GN=Fuk PE=2 SV=1 - [Q7TMC8_MOUSE]                                  | 2.75  | 1 | 3  | 3  | 4   | 0.81 | 1.14 | 1.56 | 1.16 | 1.32 | 0.82 | 1.01 | 0.88 | 1.09 | 1.03 | 1.27 | 1.10 | 1.32 | 119.19 | 6.60  |
| P70288 | Histone deacetylase 2 OS=Mus musculus GN=Hdac2 PE=1 SV=1 - [HDAC2_MOUSE]                           | 17.83 | 2 | 2  | 5  | 16  | 0.91 | 0.90 | 0.96 | 0.96 | 1.06 | 0.91 | 1.04 | 0.88 | 0.94 | 0.94 | 1.03 | 0.93 | 1.08 | 55.27  | 5.91  |
| P55096 | ATP-binding cassette sub-family D member 3 OS=Mus musculus GN=Abcd3 PE=1 SV=2 - [ABCD3_MOUSE]      | 9.26  | 1 | 4  | 4  | 9   | 0.86 | 1.13 | 1.21 | 1.25 | 1.36 | 0.88 | 0.87 | 0.88 | 0.87 | 0.99 | 1.02 | 1.10 | 1.10 | 75.43  | 9.26  |
| Q80SY5 | Pre-mRNA-splicing factor 38B OS=Mus musculus GN=Prpf38b PE=1 SV=1 - [PR38B_MOUSE]                  | 2.77  | 1 | 1  | 2  | 5   | 1.08 | 1.01 | 0.93 | 1.07 | 0.98 | 1.06 | 0.97 | 0.88 | 0.81 | 1.01 | 0.93 | 1.01 | 0.93 | 63.71  | 10.54 |
| Q9QUR6 | Prolyl endopeptidase OS=Mus musculus GN=Prep PE=2 SV=1 - [PPCE_MOUSE]                              | 28.59 | 1 | 15 | 15 | 39  | 0.95 | 1.01 | 1.05 | 1.00 | 1.07 | 0.91 | 0.94 | 0.88 | 0.93 | 0.92 | 0.92 | 1.03 | 1.10 | 80.70  | 5.73  |

|          |                                                                                                                |       |   |    |    |     |      |      |      |      |      |      |      |      |      |      |      |      |      |        |      |
|----------|----------------------------------------------------------------------------------------------------------------|-------|---|----|----|-----|------|------|------|------|------|------|------|------|------|------|------|------|------|--------|------|
| Q8C561-2 | Isoform 2 of LMBR1 domain-containing protein 2 OS=Mus musculus GN=Lmbrd2 - [LMBD2_MOUSE]                       | 10.79 | 3 | 4  | 4  | 12  | 1.10 | 1.20 | 1.00 | 1.29 | 1.17 | 0.87 | 0.77 | 0.88 | 0.84 | 1.06 | 1.00 | 1.01 | 0.91 | 75.69  | 7.50 |
| Q9CZ44   | NSFL1 cofactor p47 OS=Mus musculus GN=Nsf11c PE=1 SV=1 - [NSF1C_MOUSE]                                         | 62.43 | 4 | 21 | 21 | 183 | 1.01 | 0.94 | 0.92 | 0.91 | 0.91 | 0.83 | 0.83 | 0.88 | 0.88 | 0.82 | 0.83 | 0.85 | 0.83 | 40.69  | 5.15 |
| Q61081   | Hsp90 co-chaperone Cdc37 OS=Mus musculus GN=Cdc37 PE=2 SV=1 - [CDC37_MOUSE]                                    | 30.61 | 1 | 10 | 10 | 64  | 0.92 | 0.79 | 0.93 | 0.89 | 0.97 | 0.84 | 0.94 | 0.88 | 0.95 | 0.86 | 0.95 | 0.77 | 0.87 | 44.56  | 5.34 |
| Q9WV98   | Mitochondrial import inner membrane translocase subunit Tim9 OS=Mus musculus GN=Timm9 PE=1 SV=1 - [TIM9_MOUSE] | 56.18 | 1 | 4  | 4  | 38  | 0.94 | 0.72 | 0.74 | 0.83 | 0.89 | 0.80 | 0.88 | 0.88 | 0.93 | 0.77 | 0.81 | 0.76 | 0.85 | 10.34  | 7.21 |
| Q0KL02-3 | Isoform 3 of Triple functional domain protein OS=Mus musculus GN=Trio - [TRIO_MOUSE]                           | 9.34  | 4 | 13 | 18 | 29  | 0.95 | 0.96 | 0.92 | 1.03 | 1.04 | 0.94 | 1.00 | 0.88 | 0.96 | 0.93 | 1.00 | 0.92 | 0.96 | 288.53 | 6.35 |
| Q8BQZ4   | Ral GTPase-activating protein subunit beta OS=Mus musculus GN=Ralgapb PE=1 SV=2 - [RLGPB_MOUSE]                | 2.83  | 5 | 3  | 3  | 6   | 0.90 | 1.21 | 1.41 | 1.18 | 1.22 | 0.91 | 1.06 | 0.88 | 0.98 | 0.97 | 1.07 | 1.02 | 1.13 | 165.09 | 6.77 |
| Q9CQD1   | Ras-related protein Rab 5A OS=Mus musculus GN=Rab5a PE=1 SV=1 - [RAB5A_MOUSE]                                  | 48.37 | 2 | 5  | 7  | 60  | 1.05 | 0.99 | 0.95 | 1.01 | 0.98 | 0.86 | 0.80 | 0.88 | 0.81 | 0.85 | 0.83 | 0.94 | 0.85 | 23.58  | 8.15 |
| P49817   | Caveolin-1 OS=Mus musculus GN=Cav1 PE=1 SV=1 - [CAV1_MOUSE]                                                    | 25.28 | 7 | 3  | 3  | 4   | 0.89 | 0.83 | 1.00 | 0.90 | 0.99 | 0.94 | 1.01 | 0.88 | 1.06 | 0.91 | 1.04 | 0.70 | 0.90 | 20.53  | 6.02 |
| Q8R5C5   | Beta-actinin OS=Mus musculus GN=Actr1b PE=1 SV=1 - [ACTY_MOUSE]                                                | 41.22 | 3 | 6  | 11 | 47  | 0.93 | 0.92 | 0.96 | 1.00 | 1.04 | 0.99 | 1.06 | 0.88 | 0.89 | 0.90 | 0.95 | 0.84 | 0.95 | 42.25  | 6.40 |
| Q4FE56   | Ubiquitin carboxyl-terminal hydrolase OS=Mus musculus GN=Usp9x PE=2 SV=1 - [Q4FE56_MOUSE]                      | 12.65 | 5 | 24 | 24 | 41  | 0.98 | 1.02 | 1.02 | 1.10 | 1.13 | 0.90 | 0.92 | 0.88 | 0.95 | 1.01 | 1.01 | 1.05 | 1.07 | 290.03 | 5.83 |
| E9Q3A7   | Protein Cdh19 OS=Mus musculus GN=Cdh19 PE=3 SV=1 - [E9Q3A7_MOUSE]                                              | 1.95  | 1 | 1  | 1  | 2   | 0.91 | 1.93 | 2.12 | 1.09 | 1.20 | 1.11 | 1.21 | 0.88 | 0.96 | 1.01 | 1.10 | 1.14 | 1.25 | 87.21  | 4.70 |
| P97441   | Zinc transporter 3 OS=Mus musculus GN=Slc30a3 PE=1 SV=1 - [ZNT3_MOUSE]                                         | 16.49 | 1 | 7  | 7  | 24  | 1.12 | 1.18 | 1.11 | 1.16 | 1.04 | 0.87 | 0.79 | 0.88 | 0.78 | 0.98 | 0.82 | 0.90 | 0.86 | 41.80  | 6.38 |

|          |                                                                                                           |       |   |    |    |    |      |      |      |      |      |      |      |      |      |      |      |      |      |        |      |
|----------|-----------------------------------------------------------------------------------------------------------|-------|---|----|----|----|------|------|------|------|------|------|------|------|------|------|------|------|------|--------|------|
| Q9QZV9   | NTP2-related export protein 1 OS=Mus musculus GN=Nxt1 PE=1 SV=2 - [NXT1_MOUSE]                            | 5.71  | 3 | 1  | 1  | 2  | 0.93 | 1.23 | 1.32 | 0.94 | 1.00 | 0.83 | 0.88 | 0.88 | 0.94 | 0.84 | 0.90 | 0.88 | 0.94 | 15.84  | 5.03 |
| Q9EPE9   | Probable cation-transporting ATPase 13A1 OS=Mus musculus GN=Atp13a1 PE=1 SV=2 - [AT131_MOUSE]             | 2.00  | 1 | 2  | 2  | 3  | 1.12 | 1.02 | 0.91 | 1.21 | 1.08 | 0.80 | 0.71 | 0.88 | 0.79 | 0.94 | 0.85 | 0.93 | 0.83 | 132.30 | 8.03 |
| O88307   | Sortilin-related receptor OS=Mus musculus GN=Sort1 PE=2 SV=3 - [SORL_MOUSE]                               | 7.95  | 1 | 14 | 14 | 24 | 0.91 | 1.10 | 1.22 | 0.96 | 1.06 | 0.90 | 0.93 | 0.88 | 0.93 | 0.89 | 1.00 | 0.81 | 0.95 | 246.93 | 5.54 |
| Q9WVB4   | Slit homolog 3 protein OS=Mus musculus GN=Slit3 PE=2 SV=2 - [SLIT3_MOUSE]                                 | 2.76  | 1 | 3  | 3  | 6  | 0.97 | 1.13 | 1.11 | 1.01 | 0.96 | 0.95 | 0.96 | 0.88 | 0.91 | 0.95 | 0.91 | 0.99 | 0.99 | 167.62 | 7.62 |
| P62071   | Ras-related protein R-Ras2 OS=Mus musculus GN=Rras2 PE=1 SV=1 - [RRAS2_MOUSE]                             | 36.76 | 1 | 4  | 6  | 18 | 0.93 | 1.16 | 1.37 | 1.01 | 1.09 | 0.94 | 0.99 | 0.88 | 0.99 | 0.95 | 1.05 | 0.88 | 1.05 | 23.38  | 6.01 |
| Q91W50   | Cold shock domain-containing protein E1 OS=Mus musculus GN=Csde1 PE=2 SV=1 - [CSDE1_MOUSE]                | 27.69 | 1 | 19 | 19 | 43 | 0.98 | 0.84 | 0.94 | 0.92 | 0.97 | 0.93 | 0.97 | 0.88 | 0.87 | 0.85 | 0.98 | 0.88 | 0.93 | 88.73  | 6.37 |
| O55106   | Striatin OS=Mus musculus GN=Strn PE=1 SV=2 - [STRN_MOUSE]                                                 | 33.46 | 3 | 17 | 18 | 50 | 0.94 | 0.97 | 1.08 | 0.99 | 1.08 | 1.02 | 1.04 | 0.88 | 0.96 | 1.03 | 1.11 | 1.04 | 1.10 | 85.91  | 5.27 |
| Q92019-2 | Isoform 2 of WD repeat containing protein 7 OS=Mus musculus GN=Wdr7 - [WDR7_MOUSE]                        | 24.02 | 2 | 25 | 23 | 50 | 0.93 | 0.97 | 1.10 | 1.01 | 1.17 | 0.89 | 0.97 | 0.88 | 0.94 | 0.93 | 0.97 | 0.95 | 1.11 | 160.22 | 7.01 |
| O08800   | Serpin B8 OS=Mus musculus GN=Serpib8 PE=2 SV=2 - [SPB8_MOUSE]                                             | 4.81  | 1 | 2  | 2  | 3  | 0.91 | 1.04 | 1.14 | 1.03 | 1.12 | 0.82 | 0.90 | 0.88 | 0.96 | 0.83 | 0.91 | 0.76 | 0.83 | 42.12  | 6.46 |
| Q5NCB5   | Immunity-related GTPase family M protein 1 (Fragment) OS=Mus musculus GN=Irgm1 PE=2 SV=1 - [Q5NCB5_MOUSE] | 3.82  | 3 | 1  | 1  | 2  | 1.22 | 1.34 | 1.09 | 1.24 | 1.01 | 0.95 | 0.77 | 0.88 | 0.72 | 1.01 | 0.83 | 1.07 | 0.88 | 32.32  | 6.42 |
| Q99JY8   | Lipid phosphate phosphohydrolase 3 OS=Mus musculus GN=Ppap2b PE=1 SV=1 - [LPP3_MOUSE]                     | 19.55 | 1 | 7  | 7  | 26 | 1.15 | 0.99 | 0.94 | 1.17 | 0.97 | 0.92 | 0.80 | 0.88 | 0.78 | 0.99 | 0.92 | 1.01 | 0.97 | 35.19  | 9.07 |
| Q52KR3-  | Isoform 4 of Protein prune homolog 2 OS=Mus musculus GN=Prune2 - [PRUN2_MOUSE]                            | 9.52  | 5 | 2  | 2  | 7  | 1.13 | 1.26 | 1.10 | 1.12 | 0.98 | 1.10 | 1.00 | 0.88 | 0.77 | 1.06 | 0.97 | 1.15 | 1.09 | 33.56  | 4.97 |

|          |                                                                                                                    |       |   |    |    |     |      |      |      |      |      |      |      |      |      |      |      |      |      |       |      |
|----------|--------------------------------------------------------------------------------------------------------------------|-------|---|----|----|-----|------|------|------|------|------|------|------|------|------|------|------|------|------|-------|------|
| Q80TA6-2 | Isoform 2 of Myotubularin-related protein 12 OS=Mus musculus GN=Mtmr12 - [MTMRC_MOUSE]                             | 4.81  | 2 | 2  | 2  | 4   | 0.88 | 0.98 | 1.11 | 1.00 | 1.13 | 0.96 | 1.08 | 0.88 | 1.00 | 0.96 | 1.08 | 0.91 | 1.03 | 49.86 | 6.67 |
| Q91XL9-2 | Isoform 2 of Oxysterol-binding protein-related protein 1 OS=Mus musculus GN=Osbp11a - [OSBL1_MOUSE]                | 21.74 | 6 | 7  | 8  | 28  | 0.88 | 0.90 | 0.98 | 1.05 | 1.13 | 0.92 | 1.05 | 0.88 | 0.97 | 0.91 | 1.01 | 0.80 | 0.95 | 50.04 | 6.80 |
| G3UW81   | MCG125472 OS=Mus musculus GN=Cyp4f40 PE=3 SV=1 - [G3UW81_MOUSE]                                                    | 2.48  | 4 | 1  | 1  | 1   | 0.93 | 1.05 | 1.13 | 1.15 | 1.25 | 0.73 | 0.79 | 0.88 | 0.95 | 0.88 | 0.95 | 1.00 | 1.08 | 60.17 | 8.09 |
| P24527   | Leukotriene A-4 hydrolase OS=Mus musculus GN=Lta4h PE=1 SV=4 - [LKHA4_MOUSE]                                       | 28.64 | 1 | 14 | 14 | 39  | 1.10 | 1.11 | 0.98 | 1.11 | 1.05 | 0.95 | 0.91 | 0.88 | 0.87 | 0.99 | 0.94 | 1.04 | 0.95 | 69.01 | 6.42 |
| Q91V35   | Protein tyrosin phosphatase receptor type alpha OS=Mus musculus GN=Ptpra PE=2 SV=1 - [Q91V35_MOUSE]                | 18.54 | 3 | 11 | 12 | 17  | 1.10 | 1.15 | 1.06 | 1.04 | 0.97 | 0.92 | 0.94 | 0.88 | 0.81 | 0.91 | 0.84 | 1.03 | 1.05 | 89.79 | 6.64 |
| Q62420   | Endophilin-A1 OS=Mus musculus GN=Sh3g2 PE=1 SV=2 - [SH3G2_MOUSE]                                                   | 68.47 | 7 | 16 | 23 | 339 | 0.86 | 0.79 | 0.97 | 0.82 | 0.98 | 0.80 | 0.94 | 0.88 | 1.02 | 0.74 | 0.87 | 0.74 | 0.89 | 39.93 | 5.39 |
| Q0VB00   | Integrin beta OS=Mus musculus GN=Itgb8 PE=2 SV=1 - [Q0VB00_MOUSE]                                                  | 12.78 | 1 | 7  | 8  | 14  | 1.01 | 0.96 | 0.93 | 1.10 | 1.06 | 0.91 | 0.90 | 0.88 | 0.84 | 0.96 | 0.93 | 0.96 | 0.94 | 84.46 | 7.09 |
| P80318   | T-complex protein 1 subunit gamma OS=Mus musculus GN=Cct3 PE=1 SV=1 - [TCPG_MOUSE]                                 | 47.34 | 5 | 21 | 21 | 62  | 1.03 | 1.03 | 0.99 | 1.07 | 1.05 | 0.91 | 0.90 | 0.88 | 0.90 | 1.02 | 1.02 | 1.06 | 1.03 | 60.59 | 6.70 |
| P14869   | 60S acidic ribosomal protein P0 OS=Mus musculus GN=Rplp0 PE=1 SV=3 - [RLA0_MOUSE]                                  | 50.47 | 3 | 12 | 12 | 25  | 0.97 | 1.02 | 1.13 | 1.06 | 1.10 | 0.89 | 0.91 | 0.88 | 0.91 | 0.98 | 1.00 | 0.99 | 0.91 | 34.19 | 6.25 |
| Q99LE6   | ATP-binding cassette sub-family F member 2 OS=Mus musculus GN=Abcf2 PE=2 SV=1 - [ABCF2_MOUSE]                      | 8.44  | 1 | 5  | 5  | 10  | 1.04 | 0.88 | 0.92 | 1.01 | 1.01 | 0.93 | 0.89 | 0.88 | 0.89 | 0.91 | 0.89 | 0.93 | 0.99 | 71.74 | 7.05 |
| Q9DC16   | Endoplasmic reticulum-Golgi intermediate compartment protein 1 OS=Mus musculus GN=Ergic1 PE=1 SV=1 - [ERGI1_MOUSE] | 7.93  | 2 | 2  | 2  | 4   | 0.97 | 0.86 | 0.89 | 1.04 | 1.08 | 0.89 | 0.92 | 0.88 | 0.91 | 0.98 | 1.01 | 0.90 | 0.93 | 32.54 | 7.06 |
| P48774   | Glutathione S-transferase Mu 5 OS=Mus musculus GN=Gstm5 PE=1 SV=1 - [GSTM5_MOUSE]                                  | 47.77 | 6 | 11 | 12 | 42  | 1.07 | 1.05 | 0.96 | 1.12 | 1.02 | 0.90 | 0.79 | 0.88 | 0.81 | 0.93 | 0.91 | 1.08 | 0.99 | 26.62 | 7.21 |

|        |                                                                                                               |       |   |    |    |     |      |      |      |      |      |      |      |      |      |      |      |      |      |        |      |
|--------|---------------------------------------------------------------------------------------------------------------|-------|---|----|----|-----|------|------|------|------|------|------|------|------|------|------|------|------|------|--------|------|
| Q9D8N0 | Elongation factor 1-gamma OS=Mus musculus GN=Eef1g PE=1 SV=3 - [EF1G_MOUSE]                                   | 45.08 | 1 | 16 | 16 | 60  | 0.97 | 0.98 | 0.95 | 1.00 | 1.05 | 0.92 | 0.95 | 0.88 | 0.89 | 0.90 | 0.90 | 0.95 | 1.00 | 50.03  | 6.74 |
| Q6GYP7 | Isoform 5 of Ral GTPase-activating protein subunit alpha-1 OS=Mus musculus GN=Ralgapa1 - [RGPA1_MOUSE]        | 2.89  | 4 | 3  | 3  | 4   | 0.85 | 0.86 | 0.94 | 1.00 | 1.11 | 0.96 | 1.13 | 0.89 | 1.04 | 0.93 | 1.07 | 0.85 | 1.01 | 117.10 | 5.91 |
| O88441 | Metaxin-2 OS=Mus musculus GN=Mtx2 PE=1 SV=1 - [MTX2_MOUSE]                                                    | 17.11 | 1 | 4  | 4  | 7   | 0.91 | 0.92 | 0.99 | 0.98 | 1.02 | 0.87 | 0.94 | 0.89 | 0.89 | 0.95 | 0.93 | 1.13 | 1.14 | 29.74  | 5.63 |
| Q9CZN8 | Glutamyl-tRNA(Gln) amidotransferase subunit A, mitochondrial OS=Mus musculus GN=Qrs1 PE=2 SV=1 - [GATA_MOUSE] | 7.24  | 1 | 3  | 3  | 5   | 0.94 | 0.85 | 0.94 | 0.99 | 1.05 | 0.92 | 0.90 | 0.89 | 0.93 | 1.04 | 0.98 | 1.18 | 1.10 | 56.75  | 5.95 |
| O55143 | Sarcoplasmic/endoplasmic reticulum calcium ATPase 2 OS=Mus musculus GN=Atp2a2 PE=1 SV=2 - [AT2A2_MOUSE]       | 34.20 | 9 | 26 | 33 | 117 | 0.94 | 1.01 | 1.08 | 1.18 | 1.22 | 0.83 | 0.91 | 0.89 | 0.95 | 0.91 | 1.00 | 0.98 | 1.00 | 114.78 | 5.34 |
| E9PZ19 | OX-2 membrane glycoprotein OS=Mus musculus GN=Cd200 PE=2 SV=1 - [E9PZ19_MOUSE]                                | 19.38 | 5 | 3  | 3  | 14  | 1.12 | 0.87 | 0.75 | 0.99 | 0.90 | 0.96 | 0.87 | 0.89 | 0.84 | 1.00 | 0.91 | 1.00 | 0.90 | 14.30  | 7.81 |
| E9QKE4 | Rab3 GTPase-activating protein non-catalytic subunit OS=Mus musculus GN=Rab3gap2 PE=2 SV=1 - [E9QKE4_MOUSE]   | 7.86  | 3 | 10 | 10 | 18  | 1.00 | 1.06 | 1.01 | 1.09 | 1.06 | 0.92 | 0.92 | 0.89 | 0.83 | 0.91 | 0.93 | 1.01 | 1.02 | 154.54 | 6.07 |
| Q920R0 | Als1n OS=Mus musculus GN=Als2 PE=1 SV=3 - [ALS2_MOUSE]                                                        | 3.27  | 2 | 3  | 3  | 5   | 0.95 | 1.18 | 1.24 | 1.12 | 1.19 | 0.84 | 0.95 | 0.89 | 0.89 | 1.01 | 1.07 | 1.14 | 1.21 | 182.45 | 6.30 |
| Q8K0G5 | Protein TSSC1 OS=Mus musculus GN=Tssc1 PE=1 SV=2 - [TSSC1_MOUSE]                                              | 15.28 | 1 | 5  | 5  | 9   | 1.02 | 1.01 | 0.99 | 1.10 | 0.98 | 0.94 | 0.84 | 0.89 | 0.90 | 0.98 | 1.01 | 1.08 | 0.90 | 43.10  | 5.14 |
| P06745 | Glucose-6-phosphate isomerase OS=Mus musculus GN=Gpi PE=1 SV=4 - [G6PI_MOUSE]                                 | 59.86 | 1 | 28 | 28 | 239 | 1.02 | 0.92 | 0.93 | 1.10 | 1.08 | 0.93 | 0.91 | 0.89 | 0.89 | 0.95 | 0.93 | 1.00 | 0.99 | 62.73  | 8.13 |
| Q9Z0V2 | Potassium voltage-gated channel subfamily D member 2 OS=Mus musculus GN=Kcnd2 PE=1 SV=1 - [KCND2_MOUSE]       | 19.21 | 1 | 9  | 9  | 28  | 1.00 | 1.19 | 1.20 | 1.17 | 1.16 | 0.91 | 0.93 | 0.89 | 0.88 | 0.98 | 0.95 | 1.05 | 1.05 | 70.53  | 8.07 |
| O35684 | Neuroserpin OS=Mus musculus GN=Serpini1 PE=1 SV=1 - [NEUS_MOUSE]                                              | 11.71 | 2 | 4  | 4  | 6   | 0.97 | 0.88 | 0.91 | 0.97 | 0.95 | 0.92 | 0.84 | 0.89 | 0.82 | 0.78 | 0.87 | 0.75 | 0.71 | 46.32  | 4.72 |



|         |                                                                                                             |       |   |    |    |     |      |      |      |      |      |      |      |      |      |      |      |      |      |        |      |
|---------|-------------------------------------------------------------------------------------------------------------|-------|---|----|----|-----|------|------|------|------|------|------|------|------|------|------|------|------|------|--------|------|
| P62908  | 40S ribosomal protein S3 OS=Mus musculus GN=Rps3 PE=1 SV=1 - [RS3_MOUSE]                                    | 57.20 | 2 | 12 | 12 | 39  | 0.95 | 0.93 | 0.85 | 1.04 | 1.11 | 0.91 | 0.91 | 0.89 | 0.90 | 0.97 | 0.95 | 0.94 | 0.96 | 26.66  | 9.66 |
| G3UW90  | Trichorhinophalangeal syndrome 1 (Human), isoform CRA_b OS=Mus musculus GN=Trps1 PE=4 SV=1 - [G3UW90_MOUSE] | 0.94  | 2 | 1  | 1  | 1   | 0.94 | 0.93 | 0.99 | 0.94 | 1.00 | 1.00 | 1.06 | 0.89 | 0.94 | 0.90 | 0.96 | 0.89 | 0.95 | 140.85 | 7.64 |
| Q8C0M2  | Abhydrolase domain-containing protein 4 OS=Mus musculus GN=Abhd4 PE=2 SV=1 - [Q8C0M2_MOUSE]                 | 3.77  | 3 | 1  | 1  | 2   | 0.92 | 1.03 | 1.12 | 0.97 | 1.06 | 0.86 | 0.93 | 0.89 | 0.96 | 0.97 | 1.06 | 0.98 | 1.07 | 36.03  | 8.27 |
| Q69Z56  | Synaptic vesicle glycoprotein 2C OS=Mus musculus GN=Sy2c PE=1 SV=2 - [SV2C_MOUSE]                           | 5.23  | 1 | 3  | 4  | 15  | 1.28 | 1.28 | 1.00 | 1.29 | 0.92 | 1.10 | 0.85 | 0.89 | 0.69 | 1.17 | 0.92 | 1.39 | 1.05 | 82.24  | 5.11 |
| Q8BUN9  | Protein Slc24a2 OS=Mus musculus GN=Slc24a2 PE=2 SV=1 - [Q8BUN9_MOUSE]                                       | 11.11 | 3 | 3  | 7  | 21  | 0.85 | 0.78 | 0.89 | 0.94 | 1.11 | 0.85 | 1.13 | 0.89 | 1.14 | 0.81 | 1.00 | 0.77 | 0.85 | 74.19  | 6.54 |
| Q80XG9- | Isoform 2 of Leucine-rich repeat transmembrane neuronal protein 4 OS=Mus musculus GN=Lrrtm4 - [LRRT4_MOUSE] | 5.21  | 3 | 3  | 3  | 5   | 1.02 | 1.08 | 1.13 | 1.13 | 1.14 | 0.95 | 0.97 | 0.89 | 0.82 | 0.88 | 0.84 | 1.02 | 1.07 | 59.00  | 9.28 |
| Q9CTY5  | Calcium uptake protein 3, mitochondrial OS=Mus musculus GN=Micu3 PE=2 SV=2 - [MICU3_MOUSE]                  | 12.05 | 2 | 5  | 5  | 23  | 1.08 | 1.18 | 1.18 | 1.05 | 1.10 | 1.04 | 0.99 | 0.89 | 0.91 | 0.87 | 0.81 | 1.05 | 1.06 | 59.77  | 7.15 |
| P68040  | Guanine nucleotide-binding protein subunit beta-2-like 1 OS=Mus musculus GN=Gnb2l1 PE=1 SV=3 - [GBLP_MOUSE] | 62.46 | 1 | 14 | 14 | 33  | 0.96 | 0.92 | 0.92 | 1.06 | 1.07 | 0.84 | 0.87 | 0.89 | 0.88 | 0.87 | 0.92 | 0.96 | 1.04 | 35.05  | 7.69 |
| E9PYJ8  | Histone acetyltransferase p300 OS=Mus musculus GN=Ep300 PE=4 SV=1 - [E9PYJ8_MOUSE]                          | 1.41  | 2 | 1  | 3  | 4   | 1.07 | 0.99 | 0.93 | 0.91 | 0.85 | 0.94 | 0.87 | 0.89 | 0.83 | 0.93 | 0.87 | 1.07 | 1.00 | 263.14 | 8.54 |
| Q8BFR5  | Elongation factor Tu, mitochondrial OS=Mus musculus GN=Tufm PE=1 SV=1 - [EFTU_MOUSE]                        | 59.29 | 3 | 21 | 21 | 134 | 0.92 | 0.81 | 0.84 | 1.00 | 1.06 | 0.87 | 0.94 | 0.89 | 0.93 | 0.85 | 0.91 | 0.84 | 0.89 | 49.48  | 7.56 |
| Q80WQ2  | Protein VAC14 homolog OS=Mus musculus GN=Vac14 PE=1 SV=1 - [VAC14_MOUSE]                                    | 6.27  | 1 | 4  | 4  | 7   | 1.12 | 1.01 | 1.06 | 1.14 | 1.11 | 0.89 | 0.86 | 0.89 | 0.83 | 0.98 | 0.96 | 1.07 | 1.02 | 87.99  | 6.13 |

|          |                                                                                                                                          |       |   |    |    |     |      |      |      |      |      |      |      |      |      |      |      |      |      |        |      |
|----------|------------------------------------------------------------------------------------------------------------------------------------------|-------|---|----|----|-----|------|------|------|------|------|------|------|------|------|------|------|------|------|--------|------|
| B0F2B4   | Neuroigin 4-like<br>OS=Mus musculus<br>GN=Nlgn4l PE=1<br>SV=1 -<br>[NLGN4_MOUSE]                                                         | 8.57  | 1 | 4  | 6  | 14  | 0.99 | 1.14 | 1.21 | 1.12 | 1.15 | 1.06 | 1.06 | 0.89 | 0.95 | 0.93 | 0.99 | 0.83 | 0.89 | 97.29  | 6.32 |
| Q8BU33   | Acetolactate synthase-<br>like protein OS=Mus<br>musculus GN=Ilvbl<br>PE=2 SV=1 -<br>[ILVBL_MOUSE]                                       | 2.22  | 1 | 1  | 1  | 6   | 0.97 | 1.19 | 1.23 | 1.22 | 1.25 | 0.92 | 0.96 | 0.89 | 0.92 | 1.07 | 1.10 | 1.01 | 1.04 | 68.11  | 8.69 |
| Q08331   | Calretinin OS=Mus<br>musculus GN=Calb2<br>PE=1 SV=3 -<br>[CALB2_MOUSE]                                                                   | 60.15 | 1 | 16 | 17 | 120 | 1.72 | 0.95 | 0.59 | 0.98 | 0.56 | 0.99 | 0.56 | 0.89 | 0.51 | 1.15 | 0.69 | 1.37 | 0.81 | 31.35  | 5.02 |
| Q8BHN3   | Neutral alpha-<br>glucosidase AB<br>OS=Mus musculus<br>GN=Ganab PE=1<br>SV=1 -<br>[GANAB_MOUSE]                                          | 29.34 | 3 | 21 | 21 | 41  | 0.98 | 1.09 | 1.10 | 1.06 | 1.08 | 0.94 | 0.94 | 0.89 | 0.92 | 0.99 | 1.01 | 1.06 | 1.06 | 106.84 | 6.06 |
| Q9JK81   | UPF0160 protein<br>MYG1, mitochondrial<br>OS=Mus musculus<br>GN=Myg1 PE=2 SV=1<br>-[MYG1_MOUSE]                                          | 8.42  | 3 | 3  | 3  | 5   | 1.07 | 1.07 | 1.06 | 1.01 | 1.00 | 1.00 | 0.99 | 0.89 | 0.88 | 1.09 | 1.09 | 1.01 | 0.95 | 42.70  | 7.02 |
| Q8K050   | Phytanoyl-CoA<br>hydroxylase-interacting<br>protein OS=Mus<br>musculus GN=Phyhip<br>PE=1 SV=1 -<br>[PHYIP_MOUSE]                         | 36.36 | 2 | 9  | 12 | 34  | 0.97 | 1.02 | 0.97 | 1.09 | 1.03 | 0.95 | 0.95 | 0.89 | 0.83 | 0.89 | 0.87 | 0.92 | 0.91 | 37.53  | 7.01 |
| Q9Z188-2 | Isoform 2 of Dual<br>specificity tyrosine-<br>phosphorylation-<br>regulated kinase 1B<br>OS=Mus musculus<br>GN=Dyrk1b -<br>[DYR1B_MOUSE] | 2.89  | 6 | 2  | 2  | 3   | 1.14 | 1.05 | 0.91 | 1.00 | 0.87 | 0.98 | 0.85 | 0.89 | 0.77 | 0.95 | 0.83 | 1.15 | 1.01 | 64.87  | 9.03 |
| F8WJD6   | RNA-binding protein<br>MEX3B OS=Mus<br>musculus GN=Mex3b<br>PE=4 SV=1 -<br>[F8WJD6_MOUSE]                                                | 2.95  | 3 | 1  | 1  | 1   | 0.93 | 1.10 | 1.18 | 1.06 | 1.14 | 1.22 | 1.30 | 0.89 | 0.95 | 0.87 | 0.94 | 1.13 | 1.22 | 59.12  | 6.90 |
| Q9CS42   | Ribose-phosphate<br>pyrophosphokinase 2<br>OS=Mus musculus<br>GN=Prps2 PE=1 SV=4<br>-[PRPS2_MOUSE]                                       | 26.10 | 1 | 3  | 6  | 13  | 0.96 | 1.00 | 1.04 | 1.06 | 1.09 | 1.00 | 0.98 | 0.89 | 1.00 | 1.05 | 1.14 | 1.07 | 1.12 | 34.76  | 6.61 |
| Q99KP6   | Pre-mRNA-processing<br>factor 19 OS=Mus<br>musculus GN=Ppf19<br>PE=2 SV=1 -<br>[PRP19_MOUSE]                                             | 22.22 | 4 | 8  | 8  | 21  | 1.00 | 0.95 | 1.06 | 1.06 | 0.98 | 1.00 | 1.01 | 0.89 | 0.90 | 1.01 | 0.98 | 1.00 | 1.00 | 55.20  | 6.61 |
| D3YXA8   | Solute carrier organic<br>anion transporter<br>family member 3A1<br>OS=Mus musculus<br>GN=Slco3a1 PE=2<br>SV=1 -<br>[D3YXA8_MOUSE]       | 2.66  | 3 | 1  | 1  | 1   | 0.75 | 1.38 | 1.83 | 0.81 | 1.08 | 0.87 | 1.16 | 0.89 | 1.18 | 0.83 | 1.10 | 0.81 | 1.08 | 64.33  | 7.43 |

|          |                                                                                                                                          |       |    |    |    |    |      |      |      |      |      |      |      |      |      |      |      |      |      |        |      |
|----------|------------------------------------------------------------------------------------------------------------------------------------------|-------|----|----|----|----|------|------|------|------|------|------|------|------|------|------|------|------|------|--------|------|
| Q6ZPE2   | Myotubularin-related protein 5 OS=Mus musculus GN=Sbf1 PE=1 SV=2 - [MTMR5_MOUSE]                                                         | 23.51 | 6  | 29 | 29 | 61 | 0.95 | 1.08 | 1.15 | 1.05 | 1.05 | 0.85 | 0.93 | 0.89 | 0.95 | 0.91 | 0.97 | 1.01 | 1.06 | 208.56 | 7.12 |
| Q921Q7   | Ras and Rab interactor 1 OS=Mus musculus GN=Rin1 PE=1 SV=1 - [RIN1_MOUSE]                                                                | 15.47 | 1  | 9  | 9  | 17 | 0.97 | 1.09 | 1.12 | 1.07 | 1.12 | 0.94 | 0.93 | 0.89 | 0.90 | 1.02 | 1.04 | 1.11 | 1.13 | 82.96  | 8.72 |
| Q99KZ6   | Zinc finger protein 639 OS=Mus musculus GN=Znf639 PE=2 SV=1 - [ZN639_MOUSE]                                                              | 1.24  | 1  | 1  | 1  | 1  | 1.04 | 0.76 | 0.73 | 0.93 | 0.89 | 1.08 | 1.03 | 0.89 | 0.85 | 0.81 | 0.78 | 0.70 | 0.67 | 55.64  | 5.83 |
| P40124   | Adenylyl cyclase-associated protein 1 OS=Mus musculus GN=Cap1 PE=1 SV=4 - [CAP1_MOUSE]                                                   | 41.35 | 2  | 14 | 14 | 49 | 0.98 | 0.96 | 1.01 | 1.11 | 1.09 | 0.95 | 0.96 | 0.89 | 0.91 | 0.95 | 0.98 | 1.00 | 1.06 | 51.53  | 7.52 |
| D3Z7R0   | [3-methyl-2-oxobutanoate dehydrogenase [lipoamide]] kinase, mitochondrial (Fragment) OS=Mus musculus GN=Bckdk PE=2 SV=1 - [D3Z7R0_MOUSE] | 5.14  | 2  | 1  | 1  | 2  | 0.85 | 1.09 | 1.29 | 1.13 | 1.34 | 0.94 | 1.11 | 0.89 | 1.05 | 0.90 | 1.06 | 0.91 | 1.08 | 24.34  | 9.51 |
| Q80WG5   | Leucine-rich repeat-containing protein 8A OS=Mus musculus GN=Lrc8a PE=1 SV=1 - [LRC8A_MOUSE]                                             | 8.89  | 1  | 5  | 5  | 9  | 1.06 | 1.15 | 1.11 | 1.16 | 1.08 | 0.93 | 0.82 | 0.89 | 0.86 | 0.93 | 0.88 | 1.10 | 0.98 | 94.06  | 7.94 |
| Q791T5-2 | Isoform 2 of Mitochondrial carrier homolog 1 OS=Mus musculus GN=Mch1 - [MTCH1_MOUSE]                                                     | 16.13 | 3  | 6  | 6  | 18 | 1.08 | 1.11 | 1.07 | 1.11 | 1.00 | 0.79 | 0.71 | 0.89 | 0.81 | 0.93 | 0.83 | 1.05 | 0.98 | 39.91  | 9.48 |
| F7C528   | Protein Chd3 (Fragment) OS=Mus musculus GN=Chd3 PE=4 SV=1 - [F7C528_MOUSE]                                                               | 1.17  | 3  | 2  | 2  | 3  | 1.03 | 0.85 | 0.82 | 0.99 | 0.96 | 1.04 | 1.00 | 0.89 | 0.86 | 0.96 | 0.93 | 0.93 | 0.93 | 213.90 | 7.53 |
| B1AWN6   | Protein Scn2a1 OS=Mus musculus GN=Scn2a1 PE=3 SV=1 - [B1AWN6_MOUSE]                                                                      | 13.91 | 12 | 19 | 25 | 74 | 1.08 | 1.05 | 1.00 | 1.11 | 1.03 | 0.89 | 0.84 | 0.89 | 0.81 | 0.97 | 0.95 | 0.96 | 0.89 | 227.80 | 5.67 |
| P54923   | [Protein ADP-ribosylarginine] hydrolase OS=Mus musculus GN=Adprh PE=2 SV=1 - [ADPRH_MOUSE]                                               | 35.36 | 1  | 8  | 8  | 16 | 0.97 | 1.08 | 1.12 | 1.11 | 1.12 | 0.92 | 0.94 | 0.89 | 0.91 | 1.00 | 1.04 | 1.03 | 0.99 | 40.04  | 5.76 |
| Q9DBE8   | Alpha-1,3/1,6-mannosyltransferase ALG2 OS=Mus musculus GN=Alg2 PE=2 SV=2 - [ALG2_MOUSE]                                                  | 23.86 | 2  | 7  | 7  | 12 | 1.10 | 1.10 | 0.99 | 1.08 | 0.79 | 0.92 | 0.73 | 0.89 | 0.73 | 0.96 | 0.76 | 1.04 | 0.98 | 47.37  | 7.97 |

|        |                                                                                                  |       |   |    |    |    |      |      |      |      |      |      |      |      |      |      |      |      |      |        |       |
|--------|--------------------------------------------------------------------------------------------------|-------|---|----|----|----|------|------|------|------|------|------|------|------|------|------|------|------|------|--------|-------|
| Q8C0A6 | MAP7 domain-containing protein 2 (Fragment) OS=Mus musculus GN=Map7d2 PE=2 SV=1 - [Q8C0A6_MOUSE] | 37.84 | 1 | 1  | 4  | 10 | 1.06 | 0.71 | 0.67 | 0.89 | 0.84 | 1.12 | 1.26 | 0.89 | 0.98 | 0.97 | 0.96 | 0.84 | 0.80 | 7.80   | 10.17 |
| Q80VE5 | Protein Tbc1d22b OS=Mus musculus GN=Tbc1d22b PE=2 SV=1 - [Q80VE5_MOUSE]                          | 4.55  | 1 | 1  | 2  | 3  | 1.01 | 1.12 | 1.11 | 0.94 | 0.92 | 0.89 | 0.88 | 0.89 | 0.87 | 1.00 | 0.99 | 1.07 | 1.05 | 59.09  | 7.43  |
| Q8VD75 | Huntingtin-interacting protein 1 OS=Mus musculus GN=Hip1 PE=1 SV=2 - [HIP1_MOUSE]                | 10.11 | 1 | 8  | 9  | 21 | 0.99 | 0.93 | 0.94 | 1.12 | 1.14 | 1.02 | 1.00 | 0.89 | 0.91 | 1.00 | 1.01 | 0.95 | 1.04 | 115.13 | 5.43  |
| Q8BJY1 | 26S proteasome non-ATPase regulatory subunit 5 OS=Mus musculus GN=Psm5 PE=1 SV=4 - [PSMD5_MOUSE] | 14.29 | 2 | 5  | 5  | 10 | 0.94 | 1.33 | 1.27 | 1.02 | 1.11 | 0.87 | 0.90 | 0.89 | 0.88 | 0.92 | 0.96 | 1.00 | 1.06 | 55.94  | 5.21  |
| Q9JL8  | Serine-tRNA ligase, mitochondrial OS=Mus musculus GN=Sars2 PE=2 SV=2 - [SYSM_MOUSE]              | 12.55 | 1 | 4  | 4  | 6  | 0.96 | 1.50 | 1.70 | 0.98 | 1.05 | 0.98 | 1.05 | 0.89 | 0.95 | 0.90 | 0.96 | 1.00 | 1.00 | 58.28  | 7.90  |
| Q99JZ4 | GTP-binding protein SAR1a OS=Mus musculus GN=Sar1a PE=2 SV=1 - [Q99JZ4_MOUSE]                    | 31.82 | 2 | 3  | 4  | 7  | 1.07 | 0.78 | 0.76 | 0.94 | 0.96 | 1.03 | 0.99 | 0.89 | 0.91 | 1.09 | 0.88 | 1.11 | 1.04 | 22.38  | 6.68  |
| Q8VDG5 | Phosphopantothenate--cysteine ligase OS=Mus musculus GN=Ppcs PE=2 SV=1 - [PPCS_MOUSE]            | 8.36  | 2 | 2  | 2  | 4  | 1.04 | 0.96 | 0.91 | 1.01 | 0.97 | 0.88 | 0.84 | 0.89 | 0.85 | 0.95 | 0.91 | 0.97 | 0.93 | 33.77  | 6.55  |
| Q9ERE7 | LDLR chaperone MESD OS=Mus musculus GN=Mesdc2 PE=1 SV=1 - [MESD_MOUSE]                           | 48.21 | 3 | 11 | 11 | 75 | 1.21 | 0.87 | 0.71 | 1.00 | 0.81 | 0.87 | 0.75 | 0.89 | 0.77 | 0.79 | 0.67 | 0.87 | 0.74 | 25.19  | 6.34  |
| Q8R3C6 | Isoform 2 of Probable RNA-binding protein 19 OS=Mus musculus GN=Rbm19 - [RBM19_MOUSE]            | 1.73  | 2 | 1  | 1  | 1  | 1.00 | 0.72 | 0.72 | 0.82 | 0.82 | 0.95 | 0.95 | 0.89 | 0.89 | 0.95 | 0.96 | 0.86 | 0.86 | 57.90  | 5.55  |
| Q69ZP3 | Probable hydrolase PNKD OS=Mus musculus GN=Pnkd PE=2 SV=2 - [PNKD_MOUSE]                         | 6.75  | 3 | 1  | 2  | 3  | 0.99 | 1.22 | 1.24 | 1.01 | 1.02 | 0.94 | 0.95 | 0.89 | 0.90 | 0.91 | 0.92 | 0.94 | 0.95 | 42.99  | 8.94  |
| Q62426 | Cystatin-B OS=Mus musculus GN=Cstb PE=1 SV=1 - [CYTB_MOUSE]                                      | 37.76 | 1 | 3  | 3  | 24 | 0.95 | 0.70 | 0.67 | 0.91 | 0.90 | 0.96 | 0.97 | 0.89 | 0.92 | 0.77 | 0.78 | 0.83 | 0.86 | 11.04  | 7.39  |
| Q6QI06 | Rapamycin-insensitive companion of mTOR OS=Mus musculus GN=Rictor PE=1 SV=2 - [RICTR_MOUSE]      | 0.82  | 1 | 1  | 1  | 3  | 0.98 | 1.36 | 1.39 | 1.17 | 1.19 | 1.05 | 1.07 | 0.89 | 0.90 | 0.94 | 0.96 | 1.13 | 1.16 | 191.45 | 7.23  |

|          |                                                                                                                        |       |   |    |    |     |      |      |      |      |      |      |      |      |      |      |      |      |      |        |      |
|----------|------------------------------------------------------------------------------------------------------------------------|-------|---|----|----|-----|------|------|------|------|------|------|------|------|------|------|------|------|------|--------|------|
| F6SEU4   | Ras/Rap GTPase-activating protein<br>SynGAP OS=Mus musculus<br>GN=Syngap1 PE=3<br>SV=2 -<br>[SYG1_MOUSE]               | 36.57 | 4 | 1  | 36 | 151 | 0.91 | 1.16 | 1.26 | 0.96 | 1.08 | 0.97 | 1.06 | 0.89 | 1.00 | 0.92 | 1.00 | 1.03 | 1.13 | 148.14 | 8.98 |
| Q91YM2   | Rho GTPase-activating protein 35 OS=Mus musculus<br>GN=Arhgap35 PE=1<br>SV=3 -<br>[RHG35_MOUSE]                        | 16.68 | 1 | 18 | 18 | 31  | 0.98 | 1.01 | 1.10 | 1.04 | 1.04 | 0.90 | 0.89 | 0.89 | 0.92 | 0.97 | 0.98 | 1.02 | 1.10 | 170.29 | 6.61 |
| Q99PV0   | Pre-mRNA-processing-splicing factor 8<br>OS=Mus musculus<br>GN=Prpf8 PE=1<br>SV=2 -<br>[PRP8_MOUSE]                    | 5.52  | 2 | 11 | 11 | 23  | 0.98 | 1.05 | 1.00 | 1.06 | 1.10 | 0.92 | 1.04 | 0.89 | 0.97 | 1.01 | 1.03 | 1.00 | 1.00 | 273.44 | 8.84 |
| P08752   | Guanine nucleotide-binding protein G(i) subunit alpha-2<br>OS=Mus musculus<br>GN=Gnai2 PE=1<br>SV=5 -<br>[GNAI2_MOUSE] | 56.34 | 6 | 10 | 17 | 130 | 1.08 | 1.12 | 1.09 | 1.06 | 1.04 | 0.91 | 0.84 | 0.89 | 0.86 | 1.00 | 0.97 | 1.05 | 1.05 | 40.46  | 5.45 |
| P57759   | Endoplasmic reticulum resident protein 29<br>OS=Mus musculus<br>GN=Erp29 PE=1<br>SV=2 -<br>[ERP29_MOUSE]               | 45.80 | 4 | 10 | 10 | 38  | 1.03 | 0.85 | 0.81 | 0.85 | 0.85 | 0.82 | 0.80 | 0.89 | 0.92 | 0.77 | 0.80 | 0.83 | 0.86 | 28.81  | 6.15 |
| Q60612   | Adenosine receptor A1<br>OS=Mus musculus<br>GN=Adora1 PE=2<br>SV=4 -<br>[AA1R_MOUSE]                                   | 5.52  | 1 | 1  | 1  | 1   | 0.75 | 1.03 | 1.37 | 1.05 | 1.41 | 0.84 | 1.12 | 0.89 | 1.19 | 1.13 | 1.51 | 0.61 | 0.81 | 36.61  | 8.48 |
| G3X928   | SEC23-interacting protein OS=Mus musculus<br>GN=Sec23ip PE=4 SV=1 -<br>[G3X928_MOUSE]                                  | 10.52 | 2 | 9  | 9  | 16  | 1.03 | 0.94 | 0.86 | 1.03 | 1.00 | 0.93 | 0.92 | 0.89 | 0.92 | 0.96 | 0.95 | 1.05 | 0.97 | 110.69 | 5.72 |
| Q9ESN4   | Complement C1q-like protein 3 OS=Mus musculus<br>GN=C1ql3 PE=1 SV=1 -<br>[C1QL3_MOUSE]                                 | 28.24 | 2 | 4  | 4  | 16  | 0.93 | 0.83 | 0.88 | 1.01 | 1.08 | 0.87 | 0.93 | 0.89 | 0.89 | 0.92 | 0.96 | 0.92 | 0.93 | 26.67  | 6.79 |
| F8WHL1   | Zinc transporter 9<br>OS=Mus musculus<br>GN=Slc30a9 PE=2<br>SV=1 -<br>[F8WHL1_MOUSE]                                   | 8.78  | 3 | 4  | 4  | 6   | 1.03 | 1.23 | 1.38 | 1.29 | 1.20 | 0.84 | 0.76 | 0.89 | 0.96 | 1.00 | 1.00 | 0.93 | 0.92 | 60.64  | 8.70 |
| Q8BVG8   | Beta-arrestin-1<br>OS=Mus musculus<br>GN=Arrb1 PE=1<br>SV=1 -<br>[ARRB1_MOUSE]                                         | 52.39 | 9 | 14 | 15 | 39  | 1.03 | 1.02 | 0.95 | 0.96 | 0.93 | 0.94 | 0.90 | 0.89 | 0.88 | 0.97 | 0.89 | 0.90 | 0.88 | 46.94  | 6.28 |
| Q80UP5   | Ankyrin repeat domain-containing protein 13A<br>OS=Mus musculus<br>GN=Ankr13a PE=1<br>SV=2 -<br>[ANI13A_MOUSE]         | 6.80  | 2 | 1  | 2  | 3   | 0.82 | 1.22 | 1.48 | 0.76 | 0.92 | 0.99 | 1.20 | 0.89 | 1.07 | 0.77 | 0.93 | 0.95 | 1.15 | 67.14  | 5.08 |
| Q8R2K1-2 | Isoform 5 of Fucose mutarotase OS=Mus musculus<br>GN=Fuom -<br>[FUCM_MOUSE]                                            | 41.13 | 8 | 3  | 3  | 6   | 0.66 | 0.84 | 1.05 | 0.90 | 1.12 | 0.80 | 1.06 | 0.89 | 1.28 | 0.86 | 1.19 | 0.71 | 1.02 | 13.71  | 5.10 |

|        |                                                                                                                          |       |    |    |    |     |      |      |      |      |      |      |      |      |      |      |      |      |      |        |      |
|--------|--------------------------------------------------------------------------------------------------------------------------|-------|----|----|----|-----|------|------|------|------|------|------|------|------|------|------|------|------|------|--------|------|
| Q60854 | Serpin B6 OS=Mus musculus<br>GN=Serpnb6 PE=2<br>SV=1 -<br>[SPB6_MOUSE]                                                   | 19.31 | 10 | 6  | 6  | 10  | 1.02 | 0.88 | 0.90 | 1.04 | 1.06 | 0.88 | 0.90 | 0.89 | 0.95 | 0.94 | 0.99 | 1.03 | 1.03 | 42.57  | 5.74 |
| Q8QZV4 | Serine/threonine-protein kinase 32C OS=Mus musculus<br>GN=Stk32c PE=2<br>SV=1 -<br>[ST32C_MOUSE]                         | 17.01 | 2  | 5  | 5  | 10  | 0.95 | 0.92 | 1.01 | 1.04 | 1.06 | 0.89 | 1.02 | 0.89 | 0.90 | 0.97 | 1.05 | 0.94 | 0.96 | 55.23  | 6.16 |
| P80314 | T-complex protein 1 subunit beta OS=Mus musculus<br>GN=Cct2 PE=1 SV=4 -<br>[TCPB_MOUSE]                                  | 47.10 | 1  | 19 | 19 | 79  | 0.99 | 0.92 | 0.90 | 1.09 | 1.07 | 0.95 | 0.93 | 0.89 | 0.88 | 0.97 | 0.96 | 1.10 | 1.10 | 57.44  | 6.40 |
| Q8BVV0 | Neutral alpha-glucosidase C OS=Mus musculus<br>GN=Ganc PE=2 SV=2<br>[GANC_MOUSE]                                         | 1.34  | 2  | 1  | 1  | 1   | 0.86 | 1.19 | 1.38 | 0.92 | 1.07 | 0.79 | 0.92 | 0.89 | 1.03 | 1.10 | 1.28 | 1.39 | 1.63 | 101.94 | 6.32 |
| Q9Z0E0 | Neurochondrin OS=Mus musculus<br>GN=Ncdn PE=1 SV=1<br>- [NCDN_MOUSE]                                                     | 37.45 | 2  | 18 | 18 | 85  | 1.03 | 1.17 | 1.12 | 1.18 | 1.14 | 0.96 | 0.87 | 0.89 | 0.87 | 1.01 | 0.94 | 1.19 | 1.13 | 78.84  | 5.54 |
| Q68ED2 | Metabotropic glutamate receptor 7 OS=Mus musculus<br>GN=Grm7 PE=1 SV=1<br>- [GRM7_MOUSE]                                 | 9.07  | 5  | 6  | 6  | 10  | 1.12 | 1.03 | 0.88 | 1.14 | 0.99 | 0.94 | 0.84 | 0.89 | 0.80 | 1.04 | 0.88 | 0.98 | 0.82 | 102.15 | 7.88 |
| Q9D6J6 | NADH dehydrogenase [ubiquinone] flavoprotein 2, mitochondrial OS=Mus musculus<br>GN=Ndufv2 PE=1 SV=2 -<br>[NDUV2_MOUSE]  | 61.29 | 5  | 13 | 14 | 218 | 0.90 | 0.82 | 0.93 | 0.89 | 0.96 | 0.84 | 0.92 | 0.89 | 0.96 | 0.80 | 0.86 | 0.84 | 0.89 | 27.27  | 7.40 |
| A2AAN2 | Signal recognition particle subunit SRP68 OS=Mus musculus<br>GN=Srp68 PE=2<br>SV=1 -<br>[A2AAN2_MOUSE]                   | 10.39 | 2  | 4  | 4  | 7   | 0.93 | 1.10 | 1.22 | 1.16 | 1.32 | 0.95 | 1.22 | 0.89 | 0.95 | 1.06 | 1.05 | 0.99 | 1.14 | 65.91  | 7.27 |
| P47941 | Crk-like protein OS=Mus musculus<br>GN=Crk1 PE=1 SV=2 -<br>[CRKL_MOUSE]                                                  | 67.33 | 1  | 17 | 17 | 57  | 1.02 | 0.91 | 0.91 | 0.87 | 0.91 | 0.87 | 0.83 | 0.89 | 0.87 | 0.81 | 0.82 | 0.85 | 0.85 | 33.81  | 6.74 |
| P54754 | Ephrin type-B receptor 3 OS=Mus musculus<br>GN=Ephb3 PE=1<br>SV=2 -<br>[EPHB3_MOUSE]                                     | 11.28 | 5  | 6  | 9  | 16  | 0.95 | 1.13 | 1.15 | 1.10 | 1.13 | 0.93 | 1.01 | 0.89 | 0.92 | 0.90 | 1.01 | 0.89 | 0.99 | 109.59 | 6.28 |
| Q8VDP4 | DBIRD complex subunit KIAA1967 homolog OS=Mus musculus<br>PE=1 SV=2 -<br>[K1967_MOUSE]                                   | 24.84 | 1  | 16 | 16 | 27  | 0.93 | 0.92 | 0.94 | 0.95 | 1.11 | 1.00 | 1.02 | 0.89 | 1.10 | 1.01 | 0.99 | 1.03 | 1.05 | 102.94 | 5.25 |
| P02802 | Metallothionein-1 OS=Mus musculus<br>GN=Mt1 PE=1 SV=1 -<br>[MT1_MOUSE]                                                   | 32.79 | 1  | 2  | 2  | 7   | 1.20 | 0.86 | 0.70 | 0.97 | 0.80 | 1.02 | 0.85 | 0.89 | 0.79 | 0.88 | 0.70 | 0.89 | 0.75 | 6.01   | 7.96 |
| A2AGS2 | Dual-specificity mitogen-activated protein kinase kinase 6 OS=Mus musculus<br>GN=Map2k6 PE=2<br>SV=1 -<br>[A2AGS2_MOUSE] | 20.48 | 4  | 5  | 5  | 10  | 0.96 | 0.85 | 0.99 | 1.09 | 1.14 | 0.84 | 0.91 | 0.89 | 0.95 | 0.89 | 1.00 | 0.99 | 1.08 | 32.75  | 6.92 |

|        |                                                                                                                                           |       |   |    |    |    |      |      |      |      |      |      |      |      |      |      |      |      |      |       |      |
|--------|-------------------------------------------------------------------------------------------------------------------------------------------|-------|---|----|----|----|------|------|------|------|------|------|------|------|------|------|------|------|------|-------|------|
| Q8BGT8 | Phytanoyl-CoA hydroxylase-interacting protein-like OS=Mus musculus GN=Phyhipl PE=2 SV=1 - [PHIPL_MOUSE]                                   | 45.33 | 5 | 12 | 15 | 51 | 1.04 | 0.93 | 0.95 | 1.01 | 0.97 | 0.91 | 0.88 | 0.89 | 0.80 | 0.87 | 0.89 | 0.88 | 0.90 | 42.31 | 6.35 |
| E9QAF8 | Protein Ccnt2 OS=Mus musculus GN=Ccnt2 PE=2 SV=1 - [E9QAF8_MOUSE]                                                                         | 2.59  | 2 | 1  | 1  | 2  | 1.04 | 0.90 | 0.86 | 0.96 | 0.92 | 1.00 | 0.95 | 0.89 | 0.85 | 0.91 | 0.88 | 0.88 | 0.85 | 72.89 | 9.20 |
| Q3UMY5 | Isoform 4 of Echinoderm microtubule-associated protein-like 4 OS=Mus musculus GN=Eml4 - [EMAL4_MOUSE]                                     | 11.30 | 5 | 8  | 8  | 12 | 0.93 | 0.74 | 0.77 | 0.95 | 1.00 | 0.95 | 0.96 | 0.89 | 0.97 | 0.82 | 0.89 | 0.91 | 0.97 | 97.50 | 6.01 |
| O08848 | 60 kDa SS-A/Ro ribonucleoprotein OS=Mus musculus GN=Trove2 PE=1 SV=1 - [RO60_MOUSE]                                                       | 14.87 | 1 | 6  | 6  | 13 | 1.05 | 1.04 | 0.99 | 1.06 | 1.02 | 0.91 | 0.91 | 0.89 | 0.85 | 0.91 | 0.87 | 0.93 | 0.92 | 60.09 | 7.90 |
| F7CB14 | Arf-GAP with Rho-GAP domain, ANK repeat and PH domain-containing protein 2 (Fragment) OS=Mus musculus GN=Arap2 PE=4 SV=1 - [F7CB14_MOUSE] | 5.94  | 3 | 1  | 1  | 2  | 0.93 | 0.91 | 0.97 | 0.95 | 1.01 | 0.78 | 0.84 | 0.89 | 0.95 | 0.87 | 0.94 | 0.91 | 0.97 | 23.00 | 4.91 |
| Q8BWW3 | Phosphoacetylglucosamine mutase OS=Mus musculus GN=Pgm3 PE=2 SV=1 - [Q8BWW3_MOUSE]                                                        | 9.18  | 2 | 4  | 4  | 6  | 1.09 | 1.00 | 0.94 | 1.23 | 1.09 | 0.88 | 0.76 | 0.89 | 0.83 | 0.95 | 0.88 | 0.98 | 0.98 | 54.95 | 6.29 |
| P61205 | ADP-ribosylation factor 3 OS=Mus musculus GN=Arf3 PE=2 SV=2 - [ARF3_MOUSE]                                                                | 58.56 | 6 | 6  | 11 | 93 | 1.03 | 1.07 | 1.03 | 1.06 | 1.03 | 0.96 | 0.90 | 0.89 | 0.83 | 0.94 | 0.90 | 0.97 | 0.99 | 20.59 | 7.43 |
| Q8BXA1 | Golgi integral membrane protein 4 OS=Mus musculus GN=Golim4 PE=1 SV=1 - [GOL14_MOUSE]                                                     | 2.60  | 2 | 1  | 1  | 2  | 0.93 | 1.03 | 1.11 | 0.80 | 0.86 | 0.81 | 0.87 | 0.89 | 0.96 | 0.73 | 0.79 | 0.89 | 0.96 | 76.74 | 4.83 |
| E9QLB2 | Lysophospholipase-like protein 1 OS=Mus musculus GN=Lyp1l1 PE=4 SV=1 - [E9QLB2_MOUSE]                                                     | 9.62  | 2 | 2  | 2  | 6  | 1.14 | 0.94 | 0.82 | 1.03 | 0.90 | 0.89 | 0.77 | 0.89 | 0.78 | 0.98 | 0.86 | 1.01 | 0.89 | 26.32 | 7.88 |
| Q920E5 | Farnesyl pyrophosphate synthase OS=Mus musculus GN=Fdps PE=2 SV=1 - [FPPS_MOUSE]                                                          | 21.81 | 1 | 8  | 8  | 14 | 1.09 | 0.96 | 0.97 | 1.10 | 0.99 | 0.88 | 0.84 | 0.89 | 0.86 | 0.95 | 0.91 | 1.07 | 0.93 | 40.56 | 5.66 |
| F6RTE1 | Serine/arginine-rich splicing factor 9 (Fragment) OS=Mus musculus GN=Srsf9 PE=2 SV=1 - [F6RTE1_MOUSE]                                     | 19.62 | 1 | 1  | 3  | 5  | 1.20 | 0.87 | 0.72 | 0.80 | 0.67 | 1.04 | 0.86 | 0.89 | 0.74 | 0.89 | 0.75 | 0.67 | 0.56 | 17.73 | 6.54 |

|          |                                                                                                                       |       |   |    |    |    |      |      |      |      |      |      |      |      |      |      |      |      |      |        |       |
|----------|-----------------------------------------------------------------------------------------------------------------------|-------|---|----|----|----|------|------|------|------|------|------|------|------|------|------|------|------|------|--------|-------|
| Q8K0C4   | Lanosterol 14-alpha demethylase OS=Mus musculus<br>GN=Cyp51a1 PE=2<br>SV=1 -<br>[CP51A_MOUSE]                         | 4.37  | 1 | 2  | 2  | 6  | 1.02 | 1.27 | 1.24 | 1.02 | 1.05 | 0.91 | 0.99 | 0.89 | 0.87 | 0.92 | 0.90 | 0.92 | 1.00 | 56.74  | 8.41  |
| Q8R1J9-2 | Isoform 2 of Torsin-2A<br>OS=Mus musculus<br>GN=Tor2a -<br>[TOR2A_MOUSE]                                              | 10.06 | 3 | 1  | 1  | 2  | 0.94 | 0.97 | 1.03 | 0.96 | 1.02 | 1.12 | 1.19 | 0.89 | 0.94 | 1.03 | 1.10 | 1.10 | 1.18 | 18.08  | 5.29  |
| P45878   | Peptidyl-prolyl cis-trans isomerase FKBP2<br>OS=Mus musculus<br>GN=Fkbp2 PE=1<br>SV=1 -<br>[FKBP2_MOUSE]              | 68.57 | 1 | 9  | 9  | 50 | 1.02 | 0.76 | 0.72 | 0.92 | 0.88 | 0.87 | 0.85 | 0.89 | 0.88 | 0.81 | 0.76 | 0.73 | 0.72 | 15.33  | 8.88  |
| Q99MN1   | Lysine--tRNA ligase<br>OS=Mus musculus<br>GN=Kars PE=1 SV=1 -<br>[SYK_MOUSE]                                          | 19.16 | 2 | 9  | 9  | 22 | 1.00 | 0.93 | 0.92 | 1.01 | 1.03 | 0.93 | 0.92 | 0.89 | 0.87 | 0.93 | 0.92 | 0.97 | 0.95 | 67.80  | 5.94  |
| P0CG14   | Chromosome transmission fidelity protein 8 homolog isoform 2 OS=Mus musculus<br>GN=Chtf8 PE=2 SV=1 -<br>[CTF8A_MOUSE] | 7.32  | 1 | 2  | 2  | 2  | 0.98 | 1.10 | 1.12 | 0.94 | 0.96 | 0.77 | 0.78 | 0.89 | 0.91 | 0.88 | 0.90 | 0.66 | 0.67 | 52.21  | 12.32 |
| O88630   | Golgi SNAP receptor complex member 1<br>OS=Mus musculus<br>GN=Gosr1 PE=1<br>SV=2 -<br>[GOSR1_MOUSE]                   | 8.80  | 1 | 2  | 2  | 3  | 0.98 | 0.98 | 1.00 | 0.96 | 0.98 | 1.03 | 1.04 | 0.89 | 0.91 | 0.87 | 0.89 | 0.84 | 0.86 | 28.47  | 9.29  |
| A2A8L5   | Receptor-type tyrosine-protein phosphatase F<br>OS=Mus musculus<br>GN=Ptpnf PE=1 SV=1 -<br>[PTPRF_MOUSE]              | 10.59 | 3 | 8  | 12 | 25 | 1.08 | 1.18 | 1.16 | 0.98 | 0.96 | 0.90 | 0.86 | 0.89 | 0.82 | 0.89 | 0.84 | 0.96 | 0.90 | 211.36 | 6.65  |
| Q91YP2   | Neurolysin, mitochondrial<br>OS=Mus musculus<br>GN=Nln PE=2 SV=1 -<br>[NEUL_MOUSE]                                    | 5.26  | 1 | 3  | 3  | 5  | 1.04 | 1.09 | 1.00 | 0.96 | 1.25 | 0.80 | 0.97 | 0.89 | 1.05 | 0.88 | 0.87 | 0.93 | 1.08 | 80.38  | 6.44  |
| Q3UN00   | P2X purinoceptor<br>OS=Mus musculus<br>GN=P2rx7 PE=2 SV=1 -<br>[Q3UN00_MOUSE]                                         | 2.55  | 3 | 1  | 1  | 2  | 1.00 | 1.14 | 1.14 | 0.92 | 0.92 | 0.93 | 0.92 | 0.89 | 0.89 | 0.89 | 0.89 | 1.16 | 1.16 | 49.34  | 8.06  |
| Q00612   | Glucose-6-phosphate 1-dehydrogenase X<br>OS=Mus musculus<br>GN=G6pdx PE=1<br>SV=3 -<br>[G6PD1_MOUSE]                  | 30.49 | 4 | 13 | 13 | 31 | 0.95 | 0.87 | 0.97 | 1.04 | 1.05 | 0.91 | 0.91 | 0.89 | 0.88 | 0.93 | 0.94 | 0.92 | 1.01 | 59.22  | 6.49  |
| Q6P5D3-2 | Isoform 2 of Putative ATP-dependent RNA helicase DHX57<br>OS=Mus musculus<br>GN=Dhx57 -<br>[DHX57_MOUSE]              | 2.02  | 4 | 2  | 2  | 2  | 1.08 | 1.14 | 1.05 | 0.95 | 0.88 | 0.93 | 0.86 | 0.89 | 0.82 | 0.96 | 0.89 | 1.35 | 1.25 | 149.78 | 7.75  |
| Q0V8T9   | Contactin-associated protein like 5-1<br>OS=Mus musculus<br>GN=Ctnap5a PE=2<br>SV=1 -<br>[CTP5A_MOUSE]                | 8.28  | 5 | 7  | 7  | 11 | 1.13 | 1.17 | 1.02 | 1.02 | 0.85 | 0.99 | 0.85 | 0.89 | 0.78 | 1.03 | 0.89 | 1.03 | 0.90 | 145.62 | 6.28  |



|          |                                                                                                                  |       |   |    |    |     |      |      |      |      |      |      |      |      |      |      |      |      |      |        |      |
|----------|------------------------------------------------------------------------------------------------------------------|-------|---|----|----|-----|------|------|------|------|------|------|------|------|------|------|------|------|------|--------|------|
| Q9ERA6   | Tuftelin-interacting protein 11 OS=Mus musculus GN=Ttip11 PE=1 SV=1 - [TFP11_MOUSE]                              | 10.98 | 3 | 4  | 5  | 10  | 0.90 | 0.92 | 1.11 | 0.97 | 1.08 | 0.82 | 0.95 | 0.89 | 0.98 | 0.91 | 1.08 | 0.90 | 0.99 | 96.24  | 5.90 |
| G5E8J3   | Bromodomain and WD repeat domain containing 2, isoform CRA_a OS=Mus musculus GN=Wdr11 PE=4 SV=1 - [G5E8J3_MOUSE] | 2.53  | 2 | 3  | 3  | 4   | 0.97 | 1.18 | 1.22 | 1.09 | 1.13 | 0.92 | 0.95 | 0.89 | 0.92 | 1.01 | 1.04 | 1.18 | 1.22 | 135.88 | 7.11 |
| Q3TT92   | Dihydropyrimidinase-related protein 3 OS=Mus musculus GN=Dpysl3 PE=2 SV=1 - [Q3TT92_MOUSE]                       | 65.32 | 5 | 20 | 25 | 449 | 0.94 | 0.87 | 0.97 | 0.90 | 0.98 | 0.85 | 0.91 | 0.89 | 0.86 | 0.86 | 0.91 | 0.82 | 0.91 | 61.74  | 6.49 |
| P42932   | T-complex protein 1 subunit theta OS=Mus musculus GN=Cet8 PE=1 SV=3 - [TCPQ_MOUSE]                               | 44.16 | 6 | 22 | 22 | 62  | 1.00 | 0.97 | 0.95 | 1.08 | 1.06 | 0.94 | 0.91 | 0.89 | 0.89 | 1.01 | 0.99 | 1.00 | 0.99 | 59.52  | 5.62 |
| Q08879-2 | Isoform C of Fibulin-1 OS=Mus musculus GN=Fbln1 - [FBLN1_MOUSE]                                                  | 1.46  | 2 | 1  | 1  | 2   | 1.04 | 1.15 | 1.11 | 0.93 | 0.90 | 0.87 | 0.83 | 0.89 | 0.85 | 1.00 | 0.97 | 1.16 | 1.12 | 75.23  | 5.27 |
| Q91VU6-  | Isoform 2 of DDB1- and CUL4-associated factor 11 OS=Mus musculus GN=Dcaf11 - [DCA11_MOUSE]                       | 6.93  | 5 | 3  | 3  | 5   | 0.93 | 1.22 | 1.30 | 1.01 | 1.09 | 0.94 | 0.97 | 0.89 | 1.09 | 0.98 | 1.05 | 1.03 | 1.24 | 57.42  | 7.20 |
| Q8BG40   | Katanin p80 WD40 repeat-containing subunit B1 OS=Mus musculus GN=Katnb1 PE=1 SV=1 - [KTNB1_MOUSE]                | 18.69 | 1 | 8  | 8  | 16  | 0.94 | 1.08 | 1.14 | 1.07 | 1.07 | 0.96 | 1.03 | 0.89 | 0.93 | 0.96 | 1.00 | 1.03 | 1.02 | 72.59  | 7.27 |
| B7ZMP1   | Probable Xaa-Pro aminopeptidase 3 OS=Mus musculus GN=Xpnpep3 PE=2 SV=1 - [XPP3_MOUSE]                            | 4.15  | 1 | 1  | 1  | 1   | 1.24 | 1.19 | 0.96 | 0.79 | 0.64 | 1.07 | 0.86 | 0.89 | 0.72 | 0.91 | 0.73 | 1.35 | 1.09 | 56.64  | 7.68 |
| P50136   | 2-oxoisovalerate dehydrogenase subunit alpha, mitochondrial OS=Mus musculus GN=Bckdha PE=1 SV=1 - [ODBA_MOUSE]   | 16.97 | 2 | 5  | 5  | 9   | 0.97 | 0.90 | 1.03 | 1.01 | 1.08 | 0.94 | 0.96 | 0.89 | 1.02 | 1.02 | 1.08 | 1.07 | 1.10 | 50.34  | 8.06 |
| Q8VHQ9   | Acyl-coenzyme A thioesterase 11 OS=Mus musculus GN=Acot11 PE=2 SV=1 - [ACO11_MOUSE]                              | 18.86 | 6 | 8  | 8  | 23  | 1.03 | 0.99 | 0.94 | 1.12 | 1.11 | 0.94 | 0.89 | 0.89 | 0.90 | 0.98 | 0.89 | 0.92 | 0.92 | 67.31  | 6.80 |
| P14069   | Protein S100-A6 OS=Mus musculus GN=S100a6 PE=1 SV=3 - [S10A6_MOUSE]                                              | 8.99  | 1 | 1  | 1  | 3   | 0.91 | 0.94 | 1.03 | 0.81 | 0.89 | 0.87 | 0.95 | 0.89 | 0.98 | 0.92 | 1.01 | 1.04 | 1.15 | 10.04  | 5.48 |

|        |                                                                                                                                                           |       |   |    |    |    |      |      |      |      |      |      |      |      |      |      |      |      |      |        |      |
|--------|-----------------------------------------------------------------------------------------------------------------------------------------------------------|-------|---|----|----|----|------|------|------|------|------|------|------|------|------|------|------|------|------|--------|------|
| Q9Z2I9 | Succinyl-CoA ligase [ADP-forming] subunit beta, mitochondrial OS=Mus musculus GN=Sucla2 PE=1 SV=2 - [SUCB1_MOUSE]                                         | 42.98 | 1 | 21 | 21 | 81 | 1.03 | 0.93 | 0.87 | 1.03 | 1.05 | 0.93 | 0.94 | 0.89 | 0.88 | 0.95 | 0.90 | 0.99 | 0.98 | 50.08  | 7.01 |
| Q3U0M1 | Isoform 4 of Trafficking protein particle complex subunit 9 OS=Mus musculus GN=Trappc9 - [TPPC9_MOUSE]                                                    | 6.90  | 7 | 4  | 4  | 7  | 1.02 | 1.07 | 1.22 | 1.09 | 1.08 | 0.81 | 0.83 | 0.89 | 0.85 | 0.94 | 0.97 | 1.09 | 1.07 | 78.25  | 7.74 |
| Q8BBI0 | F-box only protein 38 OS=Mus musculus GN=Fbxo38 PE=1 SV=1 - [FBX38_MOUSE]                                                                                 | 0.75  | 1 | 1  | 1  | 1  | 1.05 | 0.89 | 0.85 | 1.05 | 1.00 | 1.00 | 0.95 | 0.89 | 0.85 | 0.92 | 0.88 | 0.95 | 0.91 | 133.84 | 6.09 |
| Q00493 | Carboxypeptidase E OS=Mus musculus GN=Cpe PE=1 SV=2 - [CBPE_MOUSE]                                                                                        | 27.31 | 1 | 9  | 9  | 22 | 1.06 | 0.96 | 0.89 | 0.97 | 0.95 | 1.05 | 0.94 | 0.89 | 0.82 | 1.03 | 0.97 | 1.07 | 1.01 | 53.22  | 5.19 |
| Q8R1F6 | Isoform 2 of Protein HID1 OS=Mus musculus GN=Hid1 - [HID1_MOUSE]                                                                                          | 2.54  | 2 | 2  | 2  | 3  | 0.88 | 1.03 | 1.18 | 1.02 | 1.16 | 0.92 | 1.04 | 0.89 | 1.02 | 1.02 | 1.17 | 0.99 | 1.13 | 88.60  | 5.94 |
| Q80TZ3 | Putative tyrosine-protein phosphatase auxilin OS=Mus musculus GN=Dnaje6 PE=2 SV=2 - [AUX1_MOUSE]                                                          | 38.49 | 5 | 22 | 24 | 85 | 0.97 | 0.84 | 0.94 | 0.99 | 1.07 | 0.87 | 0.90 | 0.89 | 0.90 | 0.91 | 0.99 | 0.84 | 0.87 | 102.23 | 7.23 |
| Q9DC53 | Copine-8 OS=Mus musculus GN=Cpne8 PE=2 SV=2 - [CPNE8_MOUSE]                                                                                               | 22.70 | 3 | 3  | 10 | 20 | 1.06 | 0.90 | 0.95 | 1.23 | 1.07 | 0.94 | 0.92 | 0.89 | 0.84 | 0.71 | 0.69 | 0.80 | 0.77 | 63.08  | 5.96 |
| P59017 | Bcl-2-like protein 13 OS=Mus musculus GN=Bcl2l13 PE=1 SV=2 - [B2L13_MOUSE]                                                                                | 13.82 | 1 | 4  | 4  | 6  | 0.82 | 0.84 | 1.18 | 0.74 | 1.04 | 0.94 | 1.03 | 0.89 | 1.04 | 0.79 | 0.93 | 0.83 | 0.97 | 46.69  | 4.59 |
| Q8BIL0 | SWI/SNF-related matrix-associated actin-dependent regulator of chromatin subfamily A-like protein 1 OS=Mus musculus GN=Smarcal1 PE=2 SV=1 - [SMAL1_MOUSE] | 2.97  | 1 | 1  | 1  | 2  | 0.81 | 0.84 | 1.03 | 0.89 | 1.09 | 0.91 | 1.11 | 0.89 | 1.09 | 0.82 | 1.01 | 0.83 | 1.02 | 100.78 | 8.90 |
| Q3B7Z2 | Oxysterol-binding protein 1 OS=Mus musculus GN=Osbp PE=1 SV=3 - [OSBP1_MOUSE]                                                                             | 28.70 | 2 | 14 | 16 | 45 | 1.03 | 0.93 | 0.95 | 1.07 | 0.97 | 1.00 | 0.98 | 0.89 | 0.88 | 0.99 | 0.94 | 1.01 | 0.93 | 88.74  | 7.20 |
| Q8CHW4 | Translation initiation factor eIF-2B subunit epsilon OS=Mus musculus GN=Elf2b5 PE=1 SV=1 - [EIF2BE_MOUSE]                                                 | 5.44  | 1 | 3  | 3  | 7  | 0.95 | 1.23 | 1.16 | 1.06 | 1.10 | 0.91 | 0.98 | 0.89 | 0.87 | 0.97 | 1.07 | 0.99 | 0.95 | 80.04  | 5.07 |
| Q8BFT9 | Synaptic vesicle 2-related protein OS=Mus musculus GN=Svop PE=1 SV=1 - [SVOP_MOUSE]                                                                       | 13.50 | 2 | 5  | 5  | 23 | 1.04 | 1.35 | 1.49 | 1.08 | 1.07 | 0.85 | 0.78 | 0.89 | 0.90 | 0.96 | 0.92 | 1.06 | 0.93 | 60.73  | 5.85 |

|          |                                                                                                       |       |   |    |    |     |      |      |      |      |      |      |      |      |      |      |      |      |      |       |       |
|----------|-------------------------------------------------------------------------------------------------------|-------|---|----|----|-----|------|------|------|------|------|------|------|------|------|------|------|------|------|-------|-------|
| P61967   | AP-1 complex subunit sigma-1A OS=Mus musculus GN=Ap1s1 PE=1 SV=1 - [AP1S1_MOUSE]                      | 21.52 | 7 | 2  | 3  | 6   | 0.91 | 1.07 | 1.18 | 1.00 | 1.17 | 0.73 | 0.88 | 0.89 | 0.98 | 1.04 | 1.14 | 0.83 | 1.01 | 18.72 | 5.73  |
| P56382   | ATP synthase subunit epsilon, mitochondrial OS=Mus musculus GN=Atp5e PE=2 SV=2 - [ATP5E_MOUSE]        | 44.23 | 1 | 3  | 3  | 13  | 0.98 | 1.02 | 1.07 | 0.97 | 0.99 | 0.86 | 0.90 | 0.89 | 0.89 | 0.87 | 0.87 | 0.94 | 1.01 | 5.83  | 10.01 |
| Q8K2Y7   | 39S ribosomal protein L47, mitochondrial OS=Mus musculus GN=Mrlp47 PE=2 SV=2 - [RM47_MOUSE]           | 3.97  | 1 | 1  | 1  | 1   | 0.90 | 0.86 | 0.96 | 0.94 | 1.05 | 0.84 | 0.93 | 0.89 | 0.99 | 0.95 | 1.05 | 0.83 | 0.92 | 29.71 | 10.21 |
| Q9CVB6   | Actin-related protein 2/3 complex subunit 2 OS=Mus musculus GN=Apc2 PE=1 SV=3 - [ARPC2_MOUSE]         | 62.67 | 2 | 14 | 14 | 42  | 1.10 | 0.87 | 0.79 | 1.04 | 1.01 | 0.94 | 0.88 | 0.89 | 0.88 | 0.90 | 0.86 | 1.01 | 0.98 | 34.34 | 7.36  |
| Q8BVE3   | V-type proton ATPase subunit H OS=Mus musculus GN=Atp6v1h PE=1 SV=1 - [VATH_MOUSE]                    | 42.24 | 1 | 18 | 18 | 78  | 1.06 | 0.97 | 0.93 | 1.14 | 1.01 | 0.97 | 0.91 | 0.89 | 0.88 | 0.94 | 0.95 | 0.98 | 0.90 | 55.82 | 6.61  |
| Q91ZA3   | Propionyl-CoA carboxylase alpha chain, mitochondrial OS=Mus musculus GN=Pcca PE=2 SV=2 - [PCCA_MOUSE] | 36.74 | 4 | 20 | 20 | 47  | 0.99 | 1.07 | 0.99 | 1.06 | 1.07 | 0.89 | 0.85 | 0.89 | 0.89 | 0.97 | 0.95 | 0.94 | 0.96 | 79.87 | 7.25  |
| P16330   | 2',3'-cyclic-nucleotide 3'-phosphodiesterase OS=Mus musculus GN=Cnp PE=1 SV=3 - [CN37_MOUSE]          | 80.95 | 6 | 37 | 38 | 406 | 0.93 | 0.92 | 0.99 | 1.04 | 1.11 | 0.93 | 0.98 | 0.89 | 0.96 | 0.90 | 0.96 | 0.92 | 1.01 | 47.09 | 8.97  |
| Q8K1S4-2 | Isoform 2 of Netrin receptor UNC5A OS=Mus musculus GN=Unc5a - [UNC5A_MOUSE]                           | 6.89  | 2 | 4  | 4  | 12  | 1.06 | 1.17 | 1.12 | 1.11 | 1.06 | 0.90 | 0.85 | 0.89 | 0.89 | 0.96 | 0.96 | 0.98 | 0.91 | 92.87 | 6.71  |
| Q9Z0L0   | Trophoblast glycoprotein OS=Mus musculus GN=Tpbg PE=1 SV=3 - [TPBG_MOUSE]                             | 13.85 | 1 | 4  | 4  | 7   | 0.80 | 1.39 | 1.74 | 0.92 | 1.14 | 0.83 | 1.07 | 0.89 | 1.15 | 0.86 | 1.03 | 0.94 | 1.24 | 46.42 | 6.83  |
| Q9Z2B2-2 | Isoform 2 of Brain mitochondrial carrier protein 1 OS=Mus musculus GN=Slc25a14 - [UCP5_MOUSE]         | 3.42  | 2 | 1  | 1  | 2   | 1.09 | 1.21 | 1.10 | 1.08 | 0.99 | 0.88 | 0.80 | 0.89 | 0.81 | 1.00 | 0.91 | 1.02 | 0.93 | 36.02 | 9.69  |
| Q9Z1N5   | Spliceosome RNA helicase Ddx39b OS=Mus musculus GN=Ddx39b PE=1 SV=1 - [DX39B_MOUSE]                   | 27.10 | 5 | 10 | 10 | 37  | 1.00 | 0.89 | 0.79 | 1.05 | 1.00 | 0.94 | 0.96 | 0.89 | 0.88 | 0.96 | 0.95 | 0.96 | 1.01 | 49.00 | 5.67  |
| Q9JIA1   | Leucine-rich glioma-inactivated protein 1 OS=Mus musculus GN=Lgi1 PE=1 SV=1 - [LGI1_MOUSE]            | 34.65 | 2 | 17 | 17 | 59  | 0.95 | 0.88 | 0.95 | 1.07 | 1.08 | 0.91 | 0.90 | 0.89 | 0.94 | 0.88 | 0.90 | 0.90 | 0.99 | 63.60 | 8.02  |

|        |                                                                                                                          |       |   |    |    |     |      |      |      |      |      |      |      |      |      |      |      |      |      |        |      |
|--------|--------------------------------------------------------------------------------------------------------------------------|-------|---|----|----|-----|------|------|------|------|------|------|------|------|------|------|------|------|------|--------|------|
| P00493 | Hypoxanthine-guanine phosphoribosyltransferase OS=Mus musculus GN=Hprt1 PE=1 SV=3 - [HPRT_MOUSE]                         | 76.15 | 1 | 12 | 12 | 60  | 1.18 | 0.96 | 0.75 | 0.95 | 0.81 | 1.02 | 0.83 | 0.89 | 0.76 | 0.99 | 0.83 | 0.99 | 0.79 | 24.55  | 6.68 |
| Q9EPU4 | Cleavage and polyadenylation specificity factor subunit 1 OS=Mus musculus GN=Cpsf1 PE=1 SV=1 - [CPSF1_MOUSE]             | 5.34  | 1 | 7  | 7  | 14  | 1.08 | 1.09 | 1.04 | 1.05 | 0.93 | 0.90 | 0.76 | 0.89 | 0.84 | 0.91 | 0.85 | 1.02 | 0.98 | 160.72 | 6.39 |
| P70459 | ETS domain-containing transcription factor ERF OS=Mus musculus GN=Erf PE=2 SV=1 - [ERF_MOUSE]                            | 4.36  | 1 | 2  | 2  | 3   | 0.97 | 1.16 | 1.19 | 1.07 | 1.10 | 0.95 | 0.97 | 0.89 | 0.92 | 0.86 | 0.89 | 1.01 | 1.04 | 59.01  | 7.28 |
| Q8K3G9 | DCC-interacting protein 13-beta OS=Mus musculus GN=Appl2 PE=2 SV=1 - [DP13B_MOUSE]                                       | 5.14  | 2 | 2  | 3  | 5   | 0.96 | 1.05 | 1.09 | 0.94 | 0.98 | 1.00 | 1.04 | 0.89 | 0.93 | 1.02 | 1.07 | 0.95 | 0.99 | 73.81  | 5.03 |
| Q9CQ86 | Migration and invasion enhancer 1 OS=Mus musculus GN=Mien1 PE=1 SV=1 - [MIEN1_MOUSE]                                     | 41.74 | 1 | 5  | 5  | 24  | 1.16 | 0.91 | 0.86 | 0.90 | 0.80 | 1.01 | 0.86 | 0.89 | 0.80 | 0.85 | 0.74 | 0.88 | 0.78 | 12.29  | 4.51 |
| P07901 | Heat shock protein HSP 90-alpha OS=Mus musculus GN=Hsp90aa1 PE=1 SV=4 - [HS90A_MOUSE]                                    | 64.53 | 4 | 31 | 45 | 610 | 1.03 | 0.89 | 0.87 | 1.07 | 1.02 | 0.92 | 0.88 | 0.89 | 0.87 | 0.92 | 0.90 | 0.94 | 0.90 | 84.73  | 5.01 |
| Q55S00 | DBF4-type zinc finger-containing protein 2 homolog OS=Mus musculus GN=Zdbf2 PE=2 SV=1 - [ZDBF2_MOUSE]                    | 1.76  | 1 | 2  | 2  | 6   | 1.30 | 1.16 | 0.88 | 0.97 | 0.91 | 1.05 | 0.87 | 0.89 | 0.81 | 1.23 | 0.94 | 1.19 | 0.93 | 273.58 | 5.22 |
| Q9DBG9 | Tax1-binding protein 3 OS=Mus musculus GN=Tax1bp3 PE=1 SV=1 - [TX1B3_MOUSE]                                              | 28.23 | 1 | 2  | 2  | 5   | 0.94 | 1.37 | 1.46 | 0.94 | 1.00 | 0.95 | 1.01 | 0.89 | 0.95 | 0.97 | 1.04 | 0.79 | 0.85 | 13.71  | 8.48 |
| Q91WD5 | NADH dehydrogenase [ubiquinone] iron-sulfur protein 2, mitochondrial OS=Mus musculus GN=Ndufs2 PE=1 SV=1 - [NDUS2_MOUSE] | 49.68 | 3 | 17 | 17 | 84  | 0.95 | 1.02 | 1.07 | 1.07 | 1.14 | 0.90 | 0.90 | 0.89 | 0.91 | 0.95 | 1.00 | 1.02 | 1.11 | 52.59  | 6.99 |
| Q3TPX4 | Exocyst complex component 5 OS=Mus musculus GN=Exoc5 PE=1 SV=2 - [EXOC5_MOUSE]                                           | 6.92  | 3 | 4  | 4  | 6   | 1.01 | 1.13 | 1.27 | 1.25 | 1.24 | 0.95 | 1.02 | 0.89 | 0.88 | 1.00 | 0.99 | 1.13 | 1.18 | 81.69  | 6.71 |
| P62631 | Elongation factor 1-alpha 2 OS=Mus musculus GN=Eef1a2 PE=1 SV=1 - [EF1A2_MOUSE]                                          | 60.69 | 1 | 12 | 21 | 196 | 0.99 | 0.96 | 0.99 | 0.98 | 1.01 | 0.92 | 0.95 | 0.89 | 0.93 | 0.93 | 0.94 | 0.92 | 0.96 | 50.42  | 9.03 |
| Q99L27 | GMP reductase 2 OS=Mus musculus GN=Gmpr2 PE=2 SV=2 - [GMPR2_MOUSE]                                                       | 6.61  | 1 | 1  | 2  | 3   | 0.95 | 1.88 | 1.98 | 1.00 | 1.05 | 0.69 | 0.73 | 0.89 | 0.94 | 0.87 | 0.92 | 0.88 | 0.93 | 37.99  | 7.44 |

|          |                                                                                                                   |       |   |    |    |     |      |      |      |      |      |      |      |      |      |      |      |      |      |        |       |
|----------|-------------------------------------------------------------------------------------------------------------------|-------|---|----|----|-----|------|------|------|------|------|------|------|------|------|------|------|------|------|--------|-------|
| P29416   | Beta-hexosaminidase subunit alpha OS=Mus musculus GN=Hexa PE=2 SV=2 - [HEXA_MOUSE]                                | 11.74 | 1 | 5  | 5  | 9   | 0.96 | 1.20 | 1.30 | 1.14 | 1.12 | 1.04 | 0.92 | 0.89 | 0.76 | 0.95 | 0.92 | 1.10 | 1.01 | 60.57  | 6.54  |
| P28571-1 | Isoform GlyT-1A of Sodium- and chloride-dependent glycine transporter 1 OS=Mus musculus GN=Slc6a9 - [SC6A9_MOUSE] | 10.58 | 8 | 5  | 5  | 21  | 1.11 | 1.14 | 0.98 | 1.11 | 1.00 | 0.93 | 0.83 | 0.89 | 0.81 | 1.00 | 0.92 | 1.01 | 0.92 | 70.51  | 7.91  |
| Q9QUJ7-2 | Isoform Short of Long-chain-fatty-acid-CoA ligase 4 OS=Mus musculus GN=AcsL4 - [ACSL4_MOUSE]                      | 8.81  | 2 | 4  | 4  | 31  | 0.87 | 1.26 | 1.36 | 1.15 | 1.23 | 0.99 | 1.06 | 0.89 | 1.06 | 1.06 | 1.21 | 1.03 | 1.13 | 74.29  | 8.00  |
| Q80U63   | Mitofusin-2 OS=Mus musculus GN=Mfn2 PE=1 SV=3 - [MFN2_MOUSE]                                                      | 20.48 | 4 | 11 | 11 | 19  | 1.05 | 1.12 | 1.07 | 1.10 | 1.05 | 0.82 | 0.79 | 0.89 | 0.84 | 0.91 | 0.82 | 0.96 | 0.88 | 86.13  | 6.77  |
| A2AN08-2 | Isoform 3 of E3 ubiquitin-protein ligase UBR4 OS=Mus musculus GN=Ubr4 - [UBR4_MOUSE]                              | 3.24  | 5 | 14 | 14 | 21  | 0.98 | 1.08 | 1.06 | 1.11 | 1.12 | 0.91 | 0.92 | 0.89 | 0.93 | 0.94 | 0.96 | 1.08 | 1.11 | 569.94 | 6.06  |
| Q8BYM5   | Neuroigin-3 OS=Mus musculus GN=Nlgn3 PE=1 SV=2 - [NLGN3_MOUSE]                                                    | 12.73 | 4 | 5  | 8  | 23  | 1.02 | 1.03 | 1.13 | 1.07 | 1.05 | 0.91 | 0.87 | 0.89 | 0.95 | 0.95 | 0.96 | 0.89 | 0.94 | 91.10  | 5.80  |
| Q3TCJ1   | BRISC complex subunit Abro1 OS=Mus musculus GN=Fam175b PE=2 SV=1 - [F175B_MOUSE]                                  | 12.05 | 2 | 4  | 4  | 8   | 0.96 | 0.99 | 1.02 | 1.06 | 1.21 | 0.93 | 0.96 | 0.89 | 0.96 | 0.99 | 1.06 | 1.00 | 1.12 | 46.91  | 6.18  |
| Q8BHL5-2 | Isoform 2 of Engulfment and cell motility protein 2 OS=Mus musculus GN=Elmo2 - [ELMO2_MOUSE]                      | 15.42 | 7 | 7  | 9  | 20  | 0.97 | 1.10 | 1.19 | 1.09 | 1.12 | 0.89 | 0.91 | 0.89 | 0.95 | 0.87 | 0.95 | 0.99 | 1.12 | 82.49  | 5.96  |
| Q80UY2-2 | Isoform 2 of E3 ubiquitin-protein ligase KCMF1 OS=Mus musculus GN=Kcmf1 - [KCMF1_MOUSE]                           | 3.04  | 2 | 1  | 1  | 2   | 1.04 | 0.83 | 0.79 | 0.88 | 0.85 | 1.10 | 1.05 | 0.89 | 0.86 | 0.94 | 0.90 | 0.98 | 0.94 | 32.12  | 5.49  |
| Q8K3W0   | BRCA1-A complex subunit BRE OS=Mus musculus GN=Bre PE=1 SV=2 - [BRE_MOUSE]                                        | 12.53 | 7 | 4  | 4  | 4   | 1.03 | 1.21 | 1.17 | 1.13 | 1.10 | 1.00 | 1.03 | 0.89 | 0.91 | 1.01 | 1.00 | 1.05 | 1.08 | 43.52  | 5.94  |
| Q810U3   | Neurofascin OS=Mus musculus GN=Nfasc PE=1 SV=1 - [NFASC_MOUSE]                                                    | 39.76 | 1 | 4  | 38 | 201 | 1.01 | 1.03 | 1.11 | 1.06 | 1.02 | 0.93 | 0.91 | 0.89 | 0.85 | 0.96 | 0.89 | 0.99 | 0.94 | 137.89 | 6.19  |
| Q80Y98-3 | Isoform 3 of Phospholipase DDHD2 OS=Mus musculus GN=Dhd2 - [DDHD2_MOUSE]                                          | 13.60 | 3 | 5  | 5  | 6   | 1.04 | 1.21 | 1.06 | 0.98 | 0.93 | 1.14 | 1.06 | 0.89 | 0.93 | 1.22 | 1.13 | 1.07 | 1.03 | 64.51  | 5.14  |
| Q9CQF8   | Ribosomal protein 63, mitochondrial OS=Mus musculus GN=Mrp63 PE=2 SV=1 - [RT63_MOUSE]                             | 20.59 | 1 | 2  | 2  | 4   | 0.89 | 0.75 | 0.85 | 0.82 | 0.95 | 0.81 | 0.91 | 0.89 | 1.03 | 0.82 | 0.93 | 0.71 | 0.78 | 11.94  | 10.15 |

|          |                                                                                                 |       |    |    |    |    |      |      |      |      |      |      |      |      |      |      |      |      |      |        |      |
|----------|-------------------------------------------------------------------------------------------------|-------|----|----|----|----|------|------|------|------|------|------|------|------|------|------|------|------|------|--------|------|
| O08842   | GDNF family receptor alpha-2 OS=Mus musculus GN=Gfra2 PE=2 SV=1 - [GFRA2_MOUSE]                 | 14.47 | 3  | 6  | 6  | 11 | 0.93 | 0.96 | 1.04 | 1.02 | 1.05 | 0.91 | 0.94 | 0.89 | 0.93 | 0.80 | 0.83 | 0.90 | 1.00 | 51.56  | 7.75 |
| P39688   | Tyrosine-protein kinase Fyn OS=Mus musculus GN=Fyn PE=1 SV=4 - [FYN_MOUSE]                      | 23.09 | 55 | 5  | 11 | 23 | 1.12 | 1.07 | 0.90 | 1.13 | 0.94 | 0.89 | 0.80 | 0.89 | 0.79 | 1.01 | 0.86 | 1.02 | 0.96 | 60.64  | 6.67 |
| Q920N7   | Synaptotagmin-12 OS=Mus musculus GN=Syt12 PE=2 SV=1 - [SYT12_MOUSE]                             | 26.60 | 1  | 11 | 11 | 19 | 1.03 | 1.04 | 1.10 | 1.19 | 1.18 | 0.87 | 0.86 | 0.89 | 0.90 | 0.93 | 0.89 | 0.88 | 0.91 | 46.65  | 5.64 |
| O88851   | Putative hydrolase RBBP9 OS=Mus musculus GN=Rbbp9 PE=1 SV=2 - [RBBP9_MOUSE]                     | 40.32 | 1  | 5  | 5  | 11 | 0.90 | 0.94 | 1.18 | 1.06 | 1.27 | 0.91 | 1.01 | 0.89 | 0.92 | 0.95 | 1.06 | 0.96 | 1.10 | 20.90  | 5.97 |
| Q8VEK0   | Cell cycle control protein 50A OS=Mus musculus GN=Tmem30a PE=1 SV=1 - [CC50A_MOUSE]             | 18.68 | 2  | 6  | 6  | 18 | 1.03 | 1.00 | 0.98 | 1.09 | 1.00 | 1.02 | 0.97 | 0.89 | 0.91 | 1.02 | 0.97 | 1.04 | 1.06 | 41.03  | 8.37 |
| F6RUA3   | Striatin-interacting proteins 2 (Fragment) OS=Mus musculus GN=Strip2 PE=4 SV=1 - [F6RUA3_MOUSE] | 2.33  | 5  | 1  | 2  | 3  | 1.14 | 0.99 | 0.87 | 1.13 | 0.99 | 0.85 | 0.74 | 0.90 | 0.78 | 0.84 | 0.74 | 1.26 | 1.11 | 88.86  | 5.40 |
| D3Z0Q6   | Glycogen [starch] synthase, muscle OS=Mus musculus GN=Gys1 PE=2 SV=1 - [D3Z0Q6_MOUSE]           | 4.90  | 2  | 2  | 2  | 4  | 1.01 | 1.07 | 1.05 | 1.01 | 1.00 | 0.81 | 0.80 | 0.90 | 0.88 | 1.06 | 1.05 | 0.92 | 0.91 | 76.58  | 6.47 |
| Q8BIK4   | Dedicator of cytokinesis protein 9 OS=Mus musculus GN=Dock9 PE=1 SV=2 - [DOCK9_MOUSE]           | 4.72  | 5  | 6  | 6  | 9  | 0.96 | 1.00 | 1.00 | 1.14 | 1.20 | 0.80 | 0.89 | 0.90 | 0.91 | 0.90 | 1.01 | 0.88 | 0.95 | 235.16 | 7.25 |
| Q91YW3   | Dnaj homolog subfamily C member 3 OS=Mus musculus GN=Dnajc3 PE=1 SV=1 - [DNJC3_MOUSE]           | 13.49 | 1  | 5  | 5  | 11 | 0.97 | 0.93 | 0.97 | 0.89 | 0.91 | 0.85 | 0.89 | 0.90 | 0.88 | 0.86 | 0.88 | 0.85 | 0.86 | 57.43  | 5.85 |
| Q61142-2 | Isoform 2 of Spindlin-1 OS=Mus musculus GN=Spin1 - [SPIN1_MOUSE]                                | 45.42 | 2  | 9  | 9  | 21 | 0.82 | 0.80 | 1.01 | 0.90 | 1.08 | 0.85 | 1.09 | 0.90 | 0.95 | 0.82 | 0.95 | 0.72 | 0.86 | 27.12  | 5.53 |
| Q60709   | Amyloid-like protein 2 OS=Mus musculus GN=Aplp2 PE=2 SV=1 - [Q60709_MOUSE]                      | 21.44 | 2  | 2  | 15 | 40 | 1.02 | 0.90 | 0.98 | 0.92 | 1.04 | 0.79 | 0.86 | 0.90 | 0.90 | 0.95 | 0.93 | 0.84 | 0.85 | 85.19  | 4.73 |
| F8W156   | Disco-interacting protein 2 homolog A OS=Mus musculus GN=Dip2a PE=2 SV=1 - [F8W156_MOUSE]       | 7.55  | 3  | 6  | 9  | 16 | 1.05 | 1.12 | 1.09 | 1.03 | 0.95 | 0.95 | 0.95 | 0.90 | 0.98 | 0.92 | 0.96 | 0.94 | 0.99 | 169.41 | 7.77 |

|        |                                                                                                                 |       |    |    |    |     |      |      |      |      |      |      |      |      |      |      |      |      |      |        |      |
|--------|-----------------------------------------------------------------------------------------------------------------|-------|----|----|----|-----|------|------|------|------|------|------|------|------|------|------|------|------|------|--------|------|
| E9PUE7 | Active breakpoint cluster region-related protein OS=Mus musculus GN=Abr PE=2 SV=1 - [E9PUE7_MOUSE]              | 28.41 | 9  | 17 | 18 | 52  | 1.00 | 0.98 | 1.04 | 1.08 | 1.09 | 0.96 | 0.92 | 0.90 | 0.87 | 0.96 | 0.96 | 0.96 | 0.92 | 92.43  | 7.08 |
| Q6PDC8 | Isoform 3 of Major facilitator superfamily domain-containing protein 4 OS=Mus musculus GN=Mfsd4 - [MFSd4_MOUSE] | 3.35  | 2  | 1  | 1  | 2   | 0.88 | 0.96 | 1.09 | 1.16 | 1.31 | 0.93 | 1.05 | 0.90 | 1.01 | 0.93 | 1.05 | 0.85 | 0.97 | 39.37  | 7.40 |
| A6H584 | Collagen alpha-5(VI) chain OS=Mus musculus GN=Col6a5 PE=1 SV=2 - [CO6A5_MOUSE]                                  | 0.23  | 2  | 1  | 1  | 2   | 0.94 | 1.09 | 1.16 | 0.95 | 1.01 | 0.96 | 1.01 | 0.90 | 0.95 | 1.06 | 1.13 | 0.93 | 0.99 | 289.44 | 6.55 |
| A6PWE1 | Coilin (Fragment) OS=Mus musculus GN=Coil PE=2 SV=1 - [A6PWE1_MOUSE]                                            | 3.47  | 3  | 2  | 2  | 2   | 0.79 | 0.81 | 1.03 | 0.64 | 0.80 | 0.88 | 1.11 | 0.90 | 1.13 | 1.19 | 1.51 | 0.96 | 1.21 | 58.82  | 9.51 |
| Q9D1G1 | Ras-related protein Rab1B OS=Mus musculus GN=Rab1b PE=1 SV=1 - [RAB1B_MOUSE]                                    | 63.18 | 10 | 4  | 10 | 116 | 1.19 | 0.99 | 0.87 | 1.08 | 0.99 | 0.94 | 0.87 | 0.90 | 0.86 | 0.87 | 0.80 | 0.97 | 0.86 | 22.17  | 5.73 |
| Q8BNE1 | Isoform 2 of Protein FAM115A OS=Mus musculus GN=Fam115a - [F115A_MOUSE]                                         | 3.80  | 3  | 2  | 2  | 3   | 0.94 | 1.22 | 1.29 | 0.99 | 1.05 | 0.97 | 1.02 | 0.90 | 0.95 | 0.95 | 1.01 | 1.15 | 1.22 | 102.44 | 6.93 |
| P83887 | Tubulin gamma-1 chain OS=Mus musculus GN=Tubg1 PE=1 SV=1 - [TBG1_MOUSE]                                         | 24.17 | 1  | 1  | 6  | 21  | 0.91 | 1.47 | 1.62 | 0.94 | 1.03 | 1.00 | 1.09 | 0.90 | 0.98 | 0.91 | 1.01 | 0.97 | 1.07 | 51.07  | 6.02 |
| Q5FWH7 | Isoform 2 of Zinc transporter ZIP12 OS=Mus musculus GN=Slc39a12 - [S39AC_MOUSE]                                 | 8.12  | 3  | 4  | 4  | 7   | 1.07 | 1.27 | 1.15 | 1.05 | 0.96 | 0.87 | 0.79 | 0.90 | 0.81 | 0.78 | 0.70 | 0.92 | 0.85 | 72.39  | 5.66 |
| B2RSH2 | Guanine nucleotide-binding protein G(i) subunit alpha-1 OS=Mus musculus GN=Gnai1 PE=2 SV=1 - [GNAI1_MOUSE]      | 51.13 | 6  | 7  | 14 | 159 | 1.01 | 1.08 | 1.11 | 1.14 | 1.10 | 0.93 | 0.91 | 0.90 | 0.89 | 0.94 | 0.92 | 1.05 | 1.02 | 40.34  | 5.97 |
| Q6PDI5 | Proteasome-associated protein ECM29 homolog OS=Mus musculus GN=Ecm29 PE=1 SV=3 - [ECM29_MOUSE]                  | 3.42  | 7  | 4  | 4  | 7   | 1.02 | 0.92 | 0.97 | 1.12 | 1.15 | 0.90 | 0.87 | 0.90 | 0.91 | 0.94 | 0.96 | 1.01 | 0.99 | 203.57 | 7.06 |
| Q9CR95 | Adaptin ear-binding coat-associated protein 1 OS=Mus musculus GN=Necap1 PE=1 SV=2 - [NECP1_MOUSE]               | 49.09 | 1  | 11 | 12 | 44  | 0.95 | 0.92 | 1.01 | 0.86 | 0.94 | 0.90 | 0.93 | 0.90 | 0.93 | 0.84 | 0.87 | 0.80 | 0.81 | 29.62  | 6.38 |

|        |                                                                                                                        |       |   |    |    |    |      |      |      |      |      |      |      |      |      |      |      |      |      |        |      |
|--------|------------------------------------------------------------------------------------------------------------------------|-------|---|----|----|----|------|------|------|------|------|------|------|------|------|------|------|------|------|--------|------|
| Q80U19 | Dishevelled-associated activator of morphogenesis 2<br>OS=Mus musculus<br>GN=Daam2 PE=2<br>SV=4 -<br>[DAAM2_MOUSE]     | 9.51  | 2 | 8  | 9  | 18 | 0.94 | 1.02 | 1.25 | 1.15 | 1.20 | 0.94 | 0.98 | 0.90 | 0.94 | 1.08 | 1.13 | 1.05 | 1.14 | 128.29 | 6.92 |
| P97449 | Aminopeptidase N<br>OS=Mus musculus<br>GN=Anpep PE=1<br>SV=4 -<br>[AMPN_MOUSE]                                         | 12.42 | 1 | 11 | 11 | 19 | 1.04 | 0.91 | 0.85 | 1.00 | 0.95 | 0.79 | 0.75 | 0.90 | 0.83 | 0.86 | 0.83 | 0.88 | 0.80 | 109.58 | 5.90 |
| Q641P0 | Actin-related protein 3B<br>OS=Mus musculus<br>GN=Actr3b PE=2<br>SV=1 -<br>[ARP3B_MOUSE]                               | 42.82 | 2 | 12 | 15 | 48 | 0.91 | 0.96 | 1.02 | 1.08 | 1.19 | 0.96 | 1.08 | 0.90 | 0.96 | 0.90 | 0.99 | 0.94 | 1.07 | 47.55  | 6.02 |
| Q9CQG1 | Isoform 2 of Cation transport regulator-like protein 2<br>OS=Mus musculus<br>GN=Chac2 -<br>[CHAC2_MOUSE]               | 7.83  | 2 | 1  | 1  | 2  | 0.95 | 1.21 | 1.27 | 0.84 | 0.88 | 0.69 | 0.73 | 0.90 | 0.94 | 0.86 | 0.90 | 1.01 | 1.06 | 18.92  | 6.04 |
| O89023 | Tripeptidyl-peptidase 1<br>OS=Mus musculus<br>GN=Tpp1 PE=1 SV=2 -<br>[TPP1_MOUSE]                                      | 7.47  | 1 | 3  | 3  | 7  | 1.00 | 0.90 | 0.91 | 1.02 | 1.05 | 1.00 | 1.00 | 0.90 | 0.91 | 1.09 | 1.09 | 1.08 | 1.08 | 61.30  | 6.57 |
| A2AA71 | Protein transport protein Sec24A<br>OS=Mus musculus<br>GN=Sec24a PE=2<br>SV=1 -<br>[A2AA71_MOUSE]                      | 2.66  | 2 | 2  | 2  | 3  | 1.03 | 1.37 | 1.33 | 1.10 | 1.07 | 1.33 | 1.29 | 0.90 | 0.87 | 0.97 | 0.95 | 1.09 | 1.07 | 118.58 | 7.83 |
| Q6A0A9 | Constitutive coactivator of PPAR-gamma-like protein 1<br>OS=Mus musculus<br>GN=FAM120A PE=1<br>SV=2 -<br>[F120A_MOUSE] | 10.88 | 1 | 8  | 8  | 21 | 0.91 | 0.87 | 0.89 | 1.03 | 1.12 | 0.92 | 1.03 | 0.90 | 0.98 | 0.95 | 1.07 | 0.96 | 1.06 | 121.57 | 8.92 |
| E9PWX1 | Dipeptidyl aminopeptidase-like protein 6<br>OS=Mus musculus<br>GN=Dpp6 PE=2 SV=1 -<br>[E9PWX1_MOUSE]                   | 36.79 | 4 | 24 | 25 | 73 | 1.13 | 1.01 | 0.85 | 1.10 | 0.93 | 0.94 | 0.78 | 0.90 | 0.75 | 0.99 | 0.86 | 0.98 | 0.88 | 97.16  | 6.48 |
| O35127 | Protein C10<br>OS=Mus musculus<br>GN=Grc10 PE=2 SV=1 -<br>[C10_MOUSE]                                                  | 57.94 | 1 | 5  | 5  | 9  | 0.95 | 0.66 | 0.77 | 0.87 | 0.93 | 0.82 | 0.94 | 0.90 | 1.02 | 0.84 | 0.89 | 0.81 | 0.88 | 13.19  | 5.14 |
| P62838 | Ubiquitin-conjugating enzyme E2 D2<br>OS=Mus musculus<br>GN=Ube2d2 PE=1<br>SV=1 -<br>[UB2D2_MOUSE]                     | 40.82 | 3 | 1  | 4  | 17 | 0.79 | 1.15 | 1.45 | 0.93 | 1.17 | 0.87 | 1.10 | 0.90 | 1.13 | 0.85 | 1.08 | 0.91 | 1.15 | 16.72  | 7.83 |
| Q8K406 | Leucine-rich repeat LGI family member 3<br>OS=Mus musculus<br>GN=Lgi3 PE=1 SV=1 -<br>[LGI3_MOUSE]                      | 17.34 | 1 | 7  | 7  | 17 | 0.89 | 0.97 | 0.99 | 1.04 | 1.11 | 0.93 | 0.92 | 0.90 | 1.01 | 0.90 | 1.04 | 0.86 | 0.92 | 61.78  | 8.16 |



|        |                                                                                                                              |       |   |    |    |    |      |      |      |      |      |      |      |      |      |      |      |      |      |        |      |
|--------|------------------------------------------------------------------------------------------------------------------------------|-------|---|----|----|----|------|------|------|------|------|------|------|------|------|------|------|------|------|--------|------|
| F6V6T4 | Transmembrane emp24 domain-containing protein 2 (Fragment)<br>OS=Mus musculus<br>GN=Tmed2 PE=3<br>SV=1 -<br>[F6V6T4_MOUSE]   | 28.41 | 3 | 3  | 3  | 5  | 1.07 | 1.16 | 1.03 | 1.19 | 1.37 | 0.74 | 0.74 | 0.90 | 0.84 | 0.85 | 0.80 | 0.65 | 0.54 | 20.01  | 9.07 |
| Q50L41 | Cytosolic phospholipase A2 zeta<br>OS=Mus musculus<br>GN=Pla2g4f PE=2<br>SV=3 -<br>[PA24F_MOUSE]                             | 1.52  | 1 | 1  | 1  | 1  | 0.99 | 1.06 | 1.08 | 1.03 | 1.04 | 0.77 | 0.78 | 0.90 | 0.91 | 0.86 | 0.88 | 1.07 | 1.09 | 96.30  | 5.73 |
| P51432 | 1-phosphatidylinositol 4,5-bisphosphate phosphodiesterase beta-3<br>OS=Mus musculus<br>GN=Plec3 PE=2 SV=2 -<br>[PLCB3_MOUSE] | 6.24  | 3 | 4  | 5  | 10 | 0.98 | 1.30 | 1.32 | 1.03 | 1.07 | 0.92 | 1.00 | 0.90 | 0.87 | 1.01 | 1.02 | 1.11 | 1.13 | 139.40 | 5.94 |
| P84309 | Adenylate cyclase type 5<br>OS=Mus musculus<br>GN=Adcy5 PE=1<br>SV=2 -<br>[ADCY5_MOUSE]                                      | 13.15 | 3 | 10 | 11 | 27 | 1.04 | 1.13 | 1.06 | 1.29 | 1.28 | 1.02 | 0.98 | 0.90 | 0.82 | 1.25 | 1.18 | 1.42 | 1.30 | 139.03 | 7.06 |
| O88533 | Aromatic-L-amino-acid decarboxylase<br>OS=Mus musculus<br>GN=Ddc PE=2 SV=1 -<br>[DDC_MOUSE]                                  | 8.13  | 2 | 4  | 4  | 6  | 1.26 | 1.14 | 0.92 | 1.19 | 1.00 | 0.97 | 0.80 | 0.90 | 0.73 | 1.10 | 0.92 | 1.47 | 1.17 | 53.84  | 6.60 |
| Q99L04 | Dehydrogenase/reductase SDR family member 1<br>OS=Mus musculus<br>GN=Dhrs1 PE=2<br>SV=1 -<br>[DHRS1_MOUSE]                   | 33.55 | 1 | 7  | 7  | 14 | 0.94 | 1.04 | 1.07 | 0.97 | 1.13 | 0.95 | 1.03 | 0.90 | 1.00 | 0.93 | 0.98 | 1.06 | 1.04 | 33.98  | 8.35 |
| Q8JZR0 | Long-chain-fatty-acid-CoA ligase 5<br>OS=Mus musculus<br>GN=Acsl5 PE=2 SV=1 -<br>[ACSL5_MOUSE]                               | 6.30  | 2 | 2  | 3  | 7  | 0.89 | 0.95 | 1.02 | 1.05 | 1.18 | 0.96 | 1.08 | 0.90 | 0.96 | 0.94 | 1.15 | 0.87 | 1.08 | 76.16  | 7.09 |
| Q921M7 | Protein FAM49B<br>OS=Mus musculus<br>GN=Fam49b PE=2<br>SV=1 -<br>[FA49B_MOUSE]                                               | 41.36 | 1 | 9  | 11 | 53 | 1.01 | 1.14 | 1.18 | 1.13 | 1.08 | 0.93 | 0.95 | 0.90 | 0.89 | 1.01 | 0.99 | 1.08 | 1.15 | 36.75  | 6.06 |
| P08032 | Spectrin alpha chain, erythrocytic 1<br>OS=Mus musculus<br>GN=Spta1 PE=2 SV=3 -<br>[SPTA1_MOUSE]                             | 1.28  | 1 | 2  | 3  | 17 | 0.92 | 0.95 | 0.96 | 0.45 | 0.49 | 0.82 | 0.88 | 0.90 | 0.97 | 1.07 | 1.16 | 0.67 | 0.73 | 279.69 | 5.03 |
| Q3UPL0 | Protein transport protein Sec31A<br>OS=Mus musculus<br>GN=Sec31a PE=1<br>SV=2 -<br>[SC31A_MOUSE]                             | 20.41 | 3 | 18 | 19 | 44 | 0.97 | 1.01 | 1.08 | 1.05 | 1.10 | 1.02 | 1.03 | 0.90 | 0.94 | 1.00 | 0.98 | 0.95 | 1.03 | 133.49 | 6.76 |
| D3Z5M2 | Protein Gm10110<br>OS=Mus musculus<br>GN=Gm10110 PE=4<br>SV=1 -<br>[D3Z5M2_MOUSE]                                            | 25.20 | 5 | 7  | 13 | 35 | 0.89 | 0.80 | 0.89 | 0.95 | 1.07 | 0.86 | 0.94 | 0.90 | 1.00 | 0.93 | 0.98 | 0.86 | 0.99 | 67.72  | 9.50 |
| P70122 | Ribosome maturation protein SBDS<br>OS=Mus musculus<br>GN=Sbds PE=1 SV=4 -<br>[SBDS_MOUSE]                                   | 38.80 | 2 | 8  | 8  | 16 | 0.89 | 0.83 | 0.96 | 1.07 | 1.10 | 0.90 | 1.01 | 0.90 | 1.00 | 0.90 | 0.95 | 0.95 | 1.07 | 28.76  | 8.76 |

|          |                                                                                                                       |       |   |    |    |     |      |      |      |      |      |      |      |      |      |      |      |      |      |        |       |
|----------|-----------------------------------------------------------------------------------------------------------------------|-------|---|----|----|-----|------|------|------|------|------|------|------|------|------|------|------|------|------|--------|-------|
| Q9Z0V7   | Mitochondrial import inner membrane translocase subunit Tim17-B OS=Mus musculus GN=Timm17b PE=2 SV=1 - [TIM17B_MOUSE] | 8.72  | 1 | 1  | 1  | 3   | 0.81 | 1.05 | 1.29 | 0.91 | 1.12 | 0.93 | 1.13 | 0.90 | 1.10 | 0.76 | 0.94 | 0.92 | 1.13 | 18.34  | 9.03  |
| Q9JHQ5   | Leucine zipper transcription factor-like protein 1 OS=Mus musculus GN=Lztl1 PE=2 SV=1 - [LZTL1_MOUSE]                 | 41.14 | 4 | 11 | 11 | 31  | 0.88 | 0.70 | 0.85 | 0.80 | 0.89 | 0.84 | 0.92 | 0.90 | 1.00 | 0.76 | 0.91 | 0.73 | 0.87 | 34.75  | 5.17  |
| P62814   | V-type proton ATPase subunit B, brain isoform OS=Mus musculus GN=Atp6v1b2 PE=1 SV=1 - [VATB2_MOUSE]                   | 83.37 | 2 | 31 | 31 | 304 | 0.96 | 1.07 | 1.15 | 1.06 | 1.11 | 0.89 | 0.92 | 0.90 | 0.94 | 0.93 | 0.97 | 0.94 | 0.99 | 56.51  | 5.81  |
| Q91Z49-2 | Isoform 2 of UAP56-interacting factor OS=Mus musculus GN=Fytd1 - [UIF_MOUSE]                                          | 7.77  | 2 | 2  | 2  | 4   | 0.97 | 0.97 | 1.01 | 1.07 | 1.11 | 0.96 | 0.99 | 0.90 | 0.93 | 0.96 | 0.99 | 1.04 | 1.08 | 32.27  | 11.87 |
| Q3U7R1   | Extended synaptotagmin-1 OS=Mus musculus GN=Esy1 PE=2 SV=2 - [ESYT1_MOUSE]                                            | 6.04  | 2 | 6  | 6  | 8   | 0.83 | 0.98 | 1.19 | 1.04 | 1.17 | 0.85 | 1.01 | 0.90 | 1.00 | 0.92 | 1.03 | 0.86 | 1.05 | 121.48 | 5.95  |
| D3YWC2   | ADP-ribosylation factor-like 6 interacting protein 4 OS=Mus musculus GN=Ar16ip4 PE=4 SV=1 - [D3YWC2_MOUSE]            | 18.50 | 3 | 3  | 3  | 6   | 0.77 | 0.90 | 1.15 | 0.89 | 1.07 | 0.94 | 1.06 | 0.90 | 1.19 | 0.82 | 1.00 | 0.70 | 0.89 | 22.59  | 11.30 |
| G3UW82   | MCG140437, isoform CRA_d OS=Mus musculus GN=Myh2 PE=4 SV=1 - [G3UW82_MOUSE]                                           | 30.23 | 3 | 3  | 53 | 175 | 0.99 | 2.08 | 1.58 | 0.83 | 0.97 | 7.56 | 8.79 | 0.90 | 0.95 | 0.87 | 0.99 | 1.11 | 1.08 | 223.08 | 5.77  |
| Q5PR73   | GTP-binding protein Di-Ras2 OS=Mus musculus GN=Diras2 PE=2 SV=1 - [DIRA2_MOUSE]                                       | 42.71 | 1 | 6  | 8  | 26  | 0.90 | 0.95 | 1.01 | 1.05 | 1.15 | 0.92 | 0.99 | 0.90 | 0.93 | 0.88 | 0.95 | 0.93 | 1.01 | 22.48  | 8.76  |
| Q9R069   | Basal cell adhesion molecule OS=Mus musculus GN=Beam PE=2 SV=1 - [BCAM_MOUSE]                                         | 16.40 | 2 | 7  | 7  | 16  | 0.98 | 0.80 | 0.82 | 0.91 | 0.95 | 0.87 | 0.89 | 0.90 | 0.96 | 0.87 | 0.84 | 0.75 | 0.76 | 67.63  | 6.25  |
| Q8CIH3   | Plexin-B1 OS=Mus musculus GN=Pxbn1 PE=1 SV=2 - [PLXB1_MOUSE]                                                          | 7.13  | 1 | 10 | 10 | 17  | 1.04 | 1.17 | 1.15 | 1.10 | 1.06 | 0.91 | 0.86 | 0.90 | 0.89 | 0.99 | 0.94 | 1.01 | 1.00 | 231.23 | 5.55  |
| P28663   | Beta-soluble NSF attachment protein OS=Mus musculus GN=Napb PE=1 SV=2 - [SNAB_MOUSE]                                  | 66.11 | 2 | 13 | 16 | 108 | 1.07 | 1.09 | 1.01 | 1.11 | 1.05 | 0.99 | 0.95 | 0.90 | 0.89 | 1.00 | 0.95 | 1.08 | 1.07 | 33.54  | 5.47  |
| Q62203   | Splicing factor 3A subunit 2 OS=Mus musculus GN=SF3a2 PE=2 SV=2 - [SF3A2_MOUSE]                                       | 9.05  | 3 | 2  | 2  | 3   | 0.89 | 0.60 | 0.67 | 0.89 | 1.01 | 0.95 | 1.06 | 0.90 | 1.01 | 0.78 | 0.88 | 0.82 | 0.92 | 49.88  | 9.54  |

|          |                                                                                                                                      |       |   |    |    |    |      |      |      |      |      |      |      |      |      |      |      |      |      |        |      |
|----------|--------------------------------------------------------------------------------------------------------------------------------------|-------|---|----|----|----|------|------|------|------|------|------|------|------|------|------|------|------|------|--------|------|
| Q91ZJ5   | UTP--glucose-1-phosphate uridylyltransferase<br>OS=Mus musculus<br>GN=Ugp2 PE=2 SV=3<br>-[UGPA_MOUSE]                                | 37.99 | 2 | 15 | 15 | 40 | 1.01 | 0.94 | 0.97 | 1.10 | 1.10 | 0.95 | 0.94 | 0.90 | 0.90 | 0.97 | 0.98 | 1.04 | 1.09 | 56.94  | 7.61 |
| Q9JIF7   | Coatomer subunit beta<br>OS=Mus musculus<br>GN=Copb1 PE=1<br>SV=1 -<br>[COPB_MOUSE]                                                  | 9.76  | 1 | 7  | 7  | 18 | 0.98 | 1.09 | 1.13 | 1.04 | 1.13 | 0.85 | 0.89 | 0.90 | 0.87 | 1.01 | 0.92 | 0.99 | 1.00 | 107.00 | 6.00 |
| BIART1   | Protein Vps13d<br>OS=Mus musculus<br>GN=Vps13d PE=2<br>SV=1 -<br>[BIART1_MOUSE]                                                      | 0.71  | 3 | 2  | 2  | 4  | 1.04 | 1.32 | 1.27 | 1.00 | 0.97 | 0.94 | 0.91 | 0.90 | 0.86 | 1.06 | 1.03 | 1.15 | 1.11 | 487.02 | 6.49 |
| Q9Z1Q9   | Valine--tRNA ligase<br>OS=Mus musculus<br>GN=Vars PE=2 SV=1 -<br>[SYVC_MOUSE]                                                        | 23.83 | 6 | 24 | 24 | 46 | 0.91 | 0.99 | 1.06 | 1.09 | 1.19 | 0.93 | 1.02 | 0.90 | 0.97 | 0.96 | 1.05 | 0.93 | 1.03 | 140.13 | 7.77 |
| B2RR83   | Probable ATP-dependent RNA helicase YTHDC2<br>OS=Mus musculus<br>GN=Ythdc2 PE=2<br>SV=1 -<br>[YTDC2_MOUSE]                           | 1.31  | 1 | 1  | 1  | 1  | 0.86 | 1.05 | 1.21 | 0.96 | 1.11 | 1.00 | 1.15 | 0.90 | 1.04 | 0.70 | 0.81 | 1.02 | 1.19 | 160.99 | 8.51 |
| Q3V3R1   | Monofunctional C1-tetrahydrofolate synthase, mitochondrial<br>OS=Mus musculus<br>GN=Mthfd11 PE=1<br>SV=2 -<br>[C1TM_MOUSE]           | 13.00 | 1 | 10 | 10 | 21 | 0.89 | 1.03 | 1.19 | 1.15 | 1.26 | 0.93 | 1.01 | 0.90 | 0.99 | 0.95 | 0.99 | 0.94 | 1.03 | 105.66 | 7.02 |
| Q9EQ20   | Methylmalonate-semialdehyde dehydrogenase [acylating], mitochondrial<br>OS=Mus musculus<br>GN=Aldh6a1 PE=1<br>SV=1 -<br>[MMSA_MOUSE] | 53.64 | 1 | 21 | 21 | 59 | 1.03 | 1.08 | 1.02 | 1.15 | 1.09 | 0.98 | 0.92 | 0.90 | 0.89 | 0.95 | 0.98 | 1.05 | 0.96 | 57.88  | 8.07 |
| Q9Z110-2 | Isoform Short of Delta-1-pyrroline-5-carboxylate synthase<br>OS=Mus musculus<br>GN=Aldh18a1 -<br>[P5CS_MOUSE]                        | 16.90 | 2 | 11 | 11 | 20 | 0.96 | 1.12 | 1.17 | 1.05 | 1.08 | 0.91 | 0.87 | 0.90 | 0.91 | 0.90 | 0.96 | 1.02 | 1.04 | 87.00  | 7.55 |
| Q3ULJ0-2 | Isoform 2 of Glycerol-3-phosphate dehydrogenase 1-like protein<br>OS=Mus musculus<br>GN=Gpd11 -<br>[GPD1L_MOUSE]                     | 54.69 | 4 | 15 | 15 | 45 | 0.99 | 1.07 | 1.04 | 1.11 | 1.12 | 0.96 | 0.94 | 0.90 | 0.89 | 0.96 | 0.94 | 0.96 | 0.95 | 34.61  | 6.87 |
| Q3TN85   | UV excision repair protein RAD23 homolog A (Fragment)<br>OS=Mus musculus<br>GN=Rad23a PE=2<br>SV=1 -<br>[Q3TN85_MOUSE]               | 36.34 | 4 | 7  | 9  | 26 | 1.11 | 1.09 | 0.95 | 0.94 | 0.84 | 0.97 | 0.82 | 0.90 | 0.87 | 0.85 | 0.76 | 0.90 | 0.80 | 34.81  | 4.69 |
| A2AG47   | Protein Maged2 (Fragment)<br>OS=Mus musculus<br>GN=Maged2 PE=2 SV=1 -<br>[A2AG47_MOUSE]                                              | 3.76  | 3 | 1  | 1  | 1  | 0.96 | 1.52 | 1.58 | 1.05 | 1.09 | 0.96 | 1.00 | 0.90 | 0.93 | 1.00 | 1.04 | 1.05 | 1.09 | 22.70  | 9.92 |

|          |                                                                                                                           |       |    |    |    |     |      |      |      |      |      |      |      |      |      |      |      |      |      |        |      |
|----------|---------------------------------------------------------------------------------------------------------------------------|-------|----|----|----|-----|------|------|------|------|------|------|------|------|------|------|------|------|------|--------|------|
| P50396   | Rab GDP dissociation inhibitor alpha<br>OS=Mus musculus<br>GN=Gdi1 PE=1 SV=3 -<br>[GDIA_MOUSE]                            | 72.48 | 3  | 25 | 31 | 281 | 1.04 | 0.94 | 0.91 | 1.03 | 0.99 | 0.94 | 0.89 | 0.90 | 0.88 | 0.94 | 0.91 | 0.96 | 0.92 | 50.49  | 5.08 |
| Q5V3Q7   | Phosphofurin acidic cluster sorting protein 2<br>OS=Mus musculus<br>GN=Pacs2 PE=1 SV=2 -<br>[PACS2_MOUSE]                 | 5.57  | 2  | 2  | 3  | 4   | 1.18 | 1.32 | 1.17 | 1.06 | 0.89 | 0.94 | 0.79 | 0.90 | 0.76 | 0.87 | 0.74 | 1.12 | 0.95 | 94.87  | 6.51 |
| Q04736   | Tyrosine-protein kinase Yes<br>OS=Mus musculus GN=Yes1<br>PE=1 SV=3 -<br>[YES_MOUSE]                                      | 16.27 | 54 | 2  | 9  | 22  | 1.11 | 1.33 | 1.20 | 1.28 | 1.15 | 0.89 | 0.80 | 0.90 | 0.81 | 1.16 | 1.04 | 1.11 | 1.00 | 60.59  | 6.64 |
| P47738   | Aldehyde dehydrogenase, mitochondrial<br>OS=Mus musculus GN=Aldh2<br>PE=1 SV=1 -<br>[ALDH2_MOUSE]                         | 43.55 | 4  | 16 | 17 | 49  | 1.03 | 1.00 | 1.01 | 1.07 | 1.07 | 0.93 | 0.94 | 0.90 | 0.94 | 0.96 | 0.96 | 0.99 | 1.01 | 56.50  | 7.62 |
| Q8CFX0   | Protein Wdr17<br>OS=Mus musculus GN=Wdr17 PE=2<br>SV=1 -<br>[Q8CFX0_MOUSE]                                                | 0.94  | 5  | 1  | 1  | 2   | 0.92 | 1.22 | 1.33 | 0.99 | 1.08 | 0.93 | 1.01 | 0.90 | 0.98 | 1.01 | 1.10 | 0.96 | 1.04 | 141.52 | 6.81 |
| E9Q6P5   | Protein Ttc7b<br>OS=Mus musculus GN=Ttc7b<br>PE=2 SV=1 -<br>[E9Q6P5_MOUSE]                                                | 17.56 | 1  | 12 | 12 | 31  | 0.96 | 1.03 | 1.06 | 1.09 | 1.17 | 0.83 | 0.89 | 0.90 | 0.89 | 0.87 | 0.90 | 0.92 | 0.92 | 94.14  | 6.90 |
| Q9CWX6   | PRKR-interacting protein 1<br>OS=Mus musculus GN=Prkrip1<br>PE=1 SV=2 -<br>[PKR11_MOUSE]                                  | 4.84  | 1  | 1  | 1  | 1   | 0.83 | 1.10 | 1.32 | 0.79 | 0.94 | 0.71 | 0.85 | 0.90 | 1.08 | 0.81 | 0.97 | 0.61 | 0.74 | 21.48  | 9.42 |
| Q8R1S0   | Ubiquinone biosynthesis monooxygenase COQ6<br>OS=Mus musculus GN=Coq6 PE=2 SV=3 -<br>[COQ6_MOUSE]                         | 2.73  | 1  | 1  | 1  | 2   | 0.90 | 1.20 | 1.34 | 0.96 | 1.07 | 0.83 | 0.91 | 0.90 | 1.00 | 0.99 | 1.10 | 1.14 | 1.27 | 51.36  | 7.17 |
| Q9QYA2   | Mitochondrial import receptor subunit TOM40 homolog<br>OS=Mus musculus GN=Tomm40 PE=1<br>SV=3 -<br>[TOM40_MOUSE]          | 9.70  | 1  | 2  | 2  | 5   | 1.07 | 1.16 | 1.08 | 1.29 | 1.20 | 0.85 | 0.79 | 0.90 | 0.84 | 0.94 | 0.88 | 1.20 | 1.12 | 37.87  | 7.74 |
| Q69ZN6-2 | Isoform 2 of N-acetylglucosamine-1-phosphotransferase subunits alpha/beta<br>OS=Mus musculus GN=Gnptab -<br>[GNPTA_MOUSE] | 0.67  | 2  | 1  | 1  | 4   | 0.83 | 1.15 | 1.39 | 1.02 | 1.23 | 0.88 | 1.06 | 0.90 | 1.09 | 0.90 | 1.09 | 0.98 | 1.19 | 135.16 | 7.59 |
| Q9D0F9   | Phosphoglucomutase-1<br>OS=Mus musculus GN=Pgm1 PE=1 SV=4 -<br>[PGM1_MOUSE]                                               | 51.96 | 3  | 25 | 25 | 87  | 1.06 | 1.05 | 0.96 | 1.10 | 1.06 | 0.96 | 0.89 | 0.90 | 0.82 | 1.04 | 0.99 | 1.07 | 1.00 | 61.38  | 6.57 |
| Q3UH93   | Plexin-D1<br>OS=Mus musculus GN=Plxnd1<br>PE=1 SV=1 -<br>[PLXD1_MOUSE]                                                    | 9.40  | 2  | 13 | 13 | 23  | 1.02 | 1.09 | 1.07 | 1.15 | 1.13 | 0.95 | 0.91 | 0.90 | 0.86 | 0.99 | 0.95 | 1.02 | 0.98 | 211.47 | 7.11 |

|        |                                                                                                                   |       |   |    |    |     |      |      |      |      |      |      |      |      |      |      |      |      |      |         |      |
|--------|-------------------------------------------------------------------------------------------------------------------|-------|---|----|----|-----|------|------|------|------|------|------|------|------|------|------|------|------|------|---------|------|
| Q8BP47 | Asparagine-tRNA ligase, cytoplasmic OS=Mus musculus GN=Nars PE=1 SV=2 - [SYNC_MOUSE]                              | 28.80 | 1 | 14 | 15 | 52  | 0.93 | 1.05 | 1.12 | 1.05 | 1.13 | 0.88 | 0.95 | 0.90 | 0.96 | 0.94 | 1.04 | 0.95 | 1.04 | 64.24   | 5.86 |
| Q9D880 | Mitochondrial import inner membrane translocase subunit TIM50 OS=Mus musculus GN=Timm50 PE=1 SV=1 - [TIM50_MOUSE] | 17.85 | 1 | 5  | 5  | 16  | 0.98 | 1.32 | 1.31 | 1.25 | 1.29 | 0.87 | 0.91 | 0.90 | 0.87 | 0.98 | 1.04 | 1.06 | 1.04 | 39.75   | 8.13 |
| Q8R059 | UDP-glucose 4-epimerase OS=Mus musculus GN=Gale PE=2 SV=1 - [GALE_MOUSE]                                          | 2.88  | 1 | 1  | 1  | 1   | 1.13 | 0.78 | 0.69 | 1.07 | 0.95 | 0.93 | 0.82 | 0.90 | 0.80 | 1.08 | 0.96 | 0.95 | 0.84 | 38.20   | 6.74 |
| D3Z7P3 | Glutaminase kidney isoform, mitochondrial OS=Mus musculus GN=Gls PE=1 SV=1 - [GLSK_MOUSE]                         | 54.30 | 9 | 25 | 25 | 127 | 0.96 | 0.96 | 1.02 | 1.05 | 1.10 | 0.88 | 0.97 | 0.90 | 0.97 | 0.93 | 1.01 | 0.94 | 1.00 | 73.92   | 7.99 |
| A2BEE9 | Disks large homolog 3 OS=Mus musculus GN=Dlg3 PE=2 SV=1 - [A2BEE9_MOUSE]                                          | 44.67 | 4 | 26 | 28 | 87  | 0.94 | 1.03 | 1.04 | 0.95 | 1.02 | 0.88 | 0.92 | 0.90 | 0.93 | 0.85 | 0.92 | 0.85 | 0.93 | 92.06   | 6.86 |
| A2AGT5 | Isoform 2 of Cytoskeleton-associated protein 5 OS=Mus musculus GN=Ckap5 - [CKAP5_MOUSE]                           | 12.02 | 4 | 19 | 19 | 32  | 0.98 | 0.95 | 1.02 | 1.09 | 1.10 | 0.98 | 1.01 | 0.90 | 0.95 | 1.01 | 1.03 | 1.03 | 1.05 | 218.57  | 8.21 |
| Q61035 | Histidine-tRNA ligase, cytoplasmic OS=Mus musculus GN=Hars PE=2 SV=2 - [SYHC_MOUSE]                               | 27.11 | 1 | 9  | 12 | 24  | 1.12 | 0.91 | 0.92 | 1.06 | 0.98 | 0.95 | 0.90 | 0.90 | 0.85 | 0.90 | 0.80 | 0.97 | 0.96 | 57.40   | 6.00 |
| Q99JP6 | Homer protein homolog 3 OS=Mus musculus GN=Homer3 PE=1 SV=2 - [HOME3_MOUSE]                                       | 4.49  | 4 | 1  | 2  | 2   | 0.89 | 1.04 | 1.17 | 0.80 | 0.90 | 0.87 | 0.98 | 0.90 | 1.01 | 0.78 | 0.88 | 0.88 | 1.00 | 39.67   | 5.36 |
| F7B9G4 | Glutamyl aminopeptidase (Fragment) OS=Mus musculus GN=Enpep PE=4 SV=1 - [F7B9G4_MOUSE]                            | 3.59  | 2 | 1  | 1  | 2   | 1.09 | 1.50 | 1.37 | 1.23 | 1.12 | 0.85 | 0.78 | 0.90 | 0.82 | 1.01 | 0.92 | 1.10 | 1.01 | 57.43   | 5.21 |
| Q3UHE1 | Isoform 2 of Membrane associated phosphatidylinositol transfer protein 3 OS=Mus musculus GN=Pipnm3 [PITM3_MOUSE]  | 9.60  | 2 | 7  | 7  | 14  | 0.81 | 0.94 | 1.16 | 0.79 | 1.02 | 0.92 | 1.13 | 0.90 | 1.43 | 0.89 | 1.15 | 0.91 | 1.16 | 104.71  | 7.12 |
| E9Q035 | Protein Gm20425 OS=Mus musculus GN=Gm20425 PE=4 SV=1 - [E9Q035_MOUSE]                                             | 45.09 | 8 | 4  | 44 | 270 | 1.00 | 1.10 | 1.05 | 0.98 | 1.04 | 0.90 | 0.82 | 0.90 | 0.83 | 0.97 | 0.95 | 0.88 | 0.93 | 107.73  | 7.77 |
| Q6ZWR6 | Isoform 4 of Nesprin-1 OS=Mus musculus GN=Syn1 - [SYNE1_MOUSE]                                                    | 2.28  | 4 | 14 | 17 | 33  | 0.91 | 1.04 | 1.13 | 1.10 | 1.21 | 0.93 | 1.01 | 0.90 | 0.98 | 0.95 | 1.09 | 0.97 | 1.03 | 1009.04 | 5.59 |

|        |                                                                                                                             |       |   |    |    |    |      |      |      |      |      |      |      |      |      |      |      |      |      |        |      |
|--------|-----------------------------------------------------------------------------------------------------------------------------|-------|---|----|----|----|------|------|------|------|------|------|------|------|------|------|------|------|------|--------|------|
| Q9Z0S1 | 3'(2',5'-bisphosphate nucleotidase 1 OS=Mus musculus GN=Bpnt1 PE=1 SV=2 - [BPNT1_MOUSE]                                     | 43.18 | 3 | 9  | 9  | 20 | 0.95 | 1.00 | 1.05 | 1.03 | 1.07 | 0.86 | 0.92 | 0.90 | 0.92 | 0.95 | 0.92 | 1.07 | 1.07 | 33.18  | 5.82 |
| Q9DCD2 | Pre-mRNA-splicing factor SYF1 OS=Mus musculus GN=Xab2 PE=2 SV=1 - [SYF1_MOUSE]                                              | 2.81  | 2 | 2  | 2  | 2  | 0.75 | 1.07 | 1.43 | 0.99 | 1.33 | 0.92 | 1.22 | 0.90 | 1.20 | 0.86 | 1.15 | 0.96 | 1.29 | 99.92  | 6.23 |
| Q80ZX0 | Protein Sec24b OS=Mus musculus GN=Sec24b PE=2 SV=1 - [Q80ZX0_MOUSE]                                                         | 7.67  | 3 | 6  | 6  | 13 | 1.00 | 1.03 | 1.00 | 1.07 | 1.03 | 0.92 | 1.03 | 0.90 | 0.91 | 1.03 | 1.02 | 1.03 | 0.96 | 135.47 | 6.96 |
| P29387 | Guanine nucleotide-binding protein subunit beta-4 OS=Mus musculus GN=Gnb4 PE=2 SV=4 - [GGB4_MOUSE]                          | 21.18 | 1 | 2  | 6  | 35 | 0.99 | 1.03 | 1.04 | 1.11 | 1.03 | 0.95 | 0.94 | 0.90 | 0.86 | 0.89 | 0.96 | 1.04 | 0.95 | 37.36  | 6.16 |
| Q9WTX8 | Isoform 2 of Mitotic spindle assembly checkpoint protein MAD1 OS=Mus musculus GN=Mad111 [MD1L1_MOUSE]                       | 5.06  | 2 | 2  | 2  | 3  | 1.01 | 1.33 | 1.32 | 0.98 | 0.97 | 1.22 | 1.21 | 0.90 | 0.89 | 1.02 | 1.01 | 1.08 | 1.07 | 60.11  | 5.66 |
| A2ACG7 | Dolichyl-diphosphooligosaccharide--protein glycosyltransferase subunit 2 OS=Mus musculus GN=Rpn2 PE=2 SV=1 - [A2ACG7_MOUSE] | 28.46 | 2 | 10 | 10 | 19 | 1.10 | 1.12 | 1.01 | 1.14 | 0.99 | 0.85 | 0.74 | 0.90 | 0.79 | 0.92 | 0.83 | 1.04 | 0.81 | 67.46  | 6.23 |
| P21278 | Guanine nucleotide-binding protein subunit alpha-11 OS=Mus musculus GN=Gna11 PE=1 SV=1 - [GNA11_MOUSE]                      | 44.01 | 1 | 9  | 13 | 32 | 1.08 | 1.29 | 1.21 | 1.14 | 1.06 | 0.94 | 0.87 | 0.90 | 0.87 | 0.99 | 0.89 | 1.11 | 1.07 | 42.00  | 5.97 |
| Q80U56 | Late secretory pathway protein AVL9 homolog OS=Mus musculus GN=Av19 PE=2 SV=2 - [AVL9_MOUSE]                                | 15.41 | 1 | 7  | 7  | 15 | 1.05 | 1.19 | 1.16 | 1.10 | 1.04 | 0.99 | 0.94 | 0.90 | 0.81 | 0.93 | 1.02 | 1.07 | 1.00 | 72.14  | 6.14 |
| Q9D906 | Ubiquitin-like modifier-activating enzyme ATG7 OS=Mus musculus GN=Atg7 PE=1 SV=1 - [ATG7_MOUSE]                             | 9.31  | 1 | 6  | 6  | 8  | 0.91 | 1.14 | 1.24 | 1.08 | 1.16 | 0.84 | 0.93 | 0.90 | 0.83 | 0.87 | 0.90 | 1.00 | 1.05 | 77.47  | 6.40 |
| Q8BGB5 | LIM domain-containing protein 2 OS=Mus musculus GN=Limd2 PE=2 SV=1 - [LIMD2_MOUSE]                                          | 26.56 | 1 | 4  | 4  | 7  | 1.06 | 0.80 | 0.75 | 0.83 | 0.81 | 1.11 | 1.01 | 0.90 | 0.86 | 0.97 | 0.90 | 0.94 | 0.89 | 14.23  | 9.04 |

|          |                                                                                                                       |       |    |    |    |     |      |      |      |      |      |      |      |      |      |      |      |      |      |        |       |
|----------|-----------------------------------------------------------------------------------------------------------------------|-------|----|----|----|-----|------|------|------|------|------|------|------|------|------|------|------|------|------|--------|-------|
| Q6R0H7   | Guanine nucleotide-binding protein G(s) subunit alpha isoforms XLas OS=Mus musculus GN=Gnas PE=2 SV=1 - [GNAS1_MOUSE] | 9.00  | 13 | 7  | 10 | 61  | 1.01 | 1.18 | 1.24 | 1.07 | 1.10 | 0.91 | 0.99 | 0.90 | 0.90 | 1.01 | 1.04 | 0.98 | 1.01 | 121.43 | 4.81  |
| P30548   | Substance-P receptor OS=Mus musculus GN=Tacr1 PE=2 SV=2 - [NK1R_MOUSE]                                                | 3.69  | 1  | 1  | 1  | 2   | 1.41 | 2.93 | 2.08 | 1.32 | 0.94 | 1.15 | 0.81 | 0.90 | 0.64 | 1.44 | 1.03 | 2.06 | 1.47 | 46.29  | 7.64  |
| P62242   | 40S ribosomal protein S8 OS=Mus musculus GN=Rps8 PE=1 SV=2 - [RS8_MOUSE]                                              | 38.46 | 1  | 7  | 7  | 17  | 1.03 | 0.90 | 0.95 | 1.06 | 1.04 | 0.98 | 0.93 | 0.90 | 0.93 | 1.02 | 0.98 | 1.03 | 1.05 | 24.19  | 10.32 |
| P18872   | Guanine nucleotide-binding protein G(o) subunit alpha OS=Mus musculus GN=Gnao1 PE=1 SV=3 - [GNAO_MOUSE]               | 63.28 | 9  | 20 | 22 | 379 | 0.99 | 1.09 | 1.06 | 1.09 | 1.12 | 0.92 | 0.94 | 0.90 | 0.92 | 0.95 | 0.97 | 1.02 | 1.05 | 40.06  | 5.53  |
| Q8K4Z5   | Splicing factor 3A subunit 1 OS=Mus musculus GN=Sf3a1 PE=1 SV=1 - [SF3A1_MOUSE]                                       | 24.15 | 1  | 14 | 14 | 29  | 1.03 | 0.84 | 0.88 | 0.92 | 0.83 | 0.92 | 0.92 | 0.90 | 0.96 | 0.89 | 0.92 | 0.95 | 0.93 | 88.49  | 5.22  |
| Q7TN98-5 | Isoform 5 of Cytoplasmic polyadenylation element-binding protein 4 OS=Mus musculus GN=Cpeb4 - [CPEB4_MOUSE]           | 18.75 | 7  | 4  | 8  | 16  | 0.93 | 0.80 | 0.85 | 0.97 | 1.01 | 1.01 | 1.07 | 0.90 | 0.94 | 0.83 | 0.91 | 0.92 | 1.01 | 77.22  | 6.90  |
| E9PYG6   | Protein Rasa1 OS=Mus musculus GN=Rasa1 PE=2 SV=1 - [E9PYG6_MOUSE]                                                     | 9.73  | 1  | 6  | 6  | 13  | 1.08 | 1.13 | 1.14 | 1.14 | 1.06 | 0.89 | 0.89 | 0.90 | 0.82 | 1.12 | 1.07 | 1.05 | 1.05 | 115.36 | 6.60  |
| Q2TB6E   | Phosphatidylinositol 4-kinase type 2-alpha OS=Mus musculus GN=P4k2a PE=1 SV=1 - [P4K2A_MOUSE]                         | 12.73 | 1  | 4  | 4  | 6   | 0.88 | 1.19 | 1.37 | 1.08 | 1.23 | 0.91 | 1.02 | 0.90 | 1.00 | 0.92 | 1.02 | 0.95 | 1.05 | 54.22  | 8.05  |
| Q8C1B7-2 | Isoform 3 of Septin-11 OS=Mus musculus GN=Sept11 - [SEP11_MOUSE]                                                      | 45.18 | 3  | 8  | 20 | 103 | 0.94 | 0.90 | 0.91 | 0.95 | 0.99 | 0.89 | 0.90 | 0.90 | 0.96 | 0.90 | 0.96 | 0.84 | 0.87 | 48.93  | 6.81  |
| Q8BSK3-2 | Isoform Alpha II of Ribosomal protein S6 kinase beta-1 OS=Mus musculus GN=Rps6kb1 - [KS6B1_MOUSE]                     | 3.98  | 4  | 2  | 2  | 2   | 1.04 | 1.47 | 1.41 | 1.02 | 0.98 | 1.20 | 1.15 | 0.90 | 0.86 | 1.11 | 1.20 | 0.85 | 0.82 | 56.12  | 6.44  |
| F8WIB1   | ADP-ribosylation factor-like protein 1 (Fragment) OS=Mus musculus GN=Arl1 PE=2 SV=1 - [F8WIB1_MOUSE]                  | 25.36 | 2  | 2  | 2  | 5   | 1.13 | 1.13 | 0.94 | 1.12 | 1.01 | 1.05 | 0.90 | 0.90 | 0.75 | 0.96 | 0.87 | 0.95 | 1.02 | 15.64  | 5.60  |

|          |                                                                                                             |       |    |    |    |     |      |      |      |      |      |      |      |      |      |      |      |      |      |       |      |
|----------|-------------------------------------------------------------------------------------------------------------|-------|----|----|----|-----|------|------|------|------|------|------|------|------|------|------|------|------|------|-------|------|
| P68181-2 | Isoform 2 of cAMP-dependent protein kinase catalytic subunit beta OS=Mus musculus GN=Prkach - [KAPCB_MOUSE] | 51.48 | 4  | 7  | 12 | 49  | 1.09 | 0.91 | 0.85 | 1.15 | 1.04 | 0.91 | 0.83 | 0.90 | 0.82 | 1.01 | 0.96 | 1.07 | 1.01 | 39.42 | 8.56 |
| P35235-2 | Isoform 2 of Tyrosine-protein phosphatase non-receptor type 11 OS=Mus musculus GN=Ptpn11 - [PTN11_MOUSE]    | 31.03 | 2  | 14 | 14 | 45  | 1.05 | 1.03 | 0.99 | 1.01 | 1.02 | 0.95 | 0.95 | 0.90 | 0.86 | 0.95 | 0.91 | 0.94 | 0.92 | 67.99 | 7.30 |
| Q9DCL9   | Multifunctional protein ADE2 OS=Mus musculus GN=Paics PE=1 SV=4 - [PUR6_MOUSE]                              | 35.29 | 3  | 13 | 13 | 26  | 1.01 | 1.11 | 0.96 | 1.11 | 0.96 | 0.96 | 0.89 | 0.90 | 0.90 | 0.98 | 0.90 | 1.07 | 1.02 | 46.98 | 7.23 |
| P51655   | Glypican-4 OS=Mus musculus GN=Gpc4 PE=2 SV=2 - [GPC4_MOUSE]                                                 | 17.24 | 3  | 4  | 6  | 19  | 1.04 | 0.98 | 0.96 | 1.10 | 1.06 | 0.99 | 0.91 | 0.90 | 0.87 | 1.02 | 1.01 | 1.20 | 1.21 | 62.55 | 6.33 |
| E9QMW9   | Polypyrimidine tract-binding protein 1 OS=Mus musculus GN=Ptp1 PE=2 SV=1 - [E9QMW9_MOUSE]                   | 11.05 | 5  | 1  | 1  | 2   | 1.47 | 0.96 | 0.65 | 1.16 | 0.79 | 1.08 | 0.73 | 0.90 | 0.61 | 1.09 | 0.74 | 1.17 | 0.80 | 37.12 | 8.13 |
| O54983   | Thiomorpholine-carboxylate dehydrogenase OS=Mus musculus GN=Crym PE=1 SV=1 - [CRYM_MOUSE]                   | 36.42 | 1  | 10 | 10 | 39  | 1.05 | 1.16 | 1.07 | 1.09 | 1.10 | 0.93 | 0.89 | 0.90 | 0.88 | 1.08 | 1.03 | 1.27 | 1.20 | 33.50 | 5.67 |
| Q0VBP7   | Uncharacterized protein KIAA1644 OS=Mus musculus GN=Kiaa1644 PE=2 SV=1 - [K1644_MOUSE]                      | 14.65 | 2  | 1  | 1  | 4   | 0.74 | 1.01 | 1.36 | 1.00 | 1.36 | 0.96 | 1.30 | 0.90 | 1.22 | 1.12 | 1.52 | 0.82 | 1.11 | 22.47 | 8.79 |
| P60122   | RuvB-like 1 OS=Mus musculus GN=Ruvb1 PE=1 SV=1 - [RUVB1_MOUSE]                                              | 24.12 | 3  | 9  | 9  | 20  | 1.00 | 0.88 | 0.93 | 1.03 | 1.07 | 0.96 | 0.90 | 0.90 | 0.91 | 0.96 | 0.95 | 0.93 | 0.94 | 50.18 | 6.42 |
| Q9CQ16   | Coactosin-like protein OS=Mus musculus GN=Cotl1 PE=1 SV=3 - [COTL1_MOUSE]                                   | 64.79 | 1  | 8  | 8  | 28  | 1.01 | 1.04 | 1.03 | 1.00 | 1.01 | 0.90 | 0.87 | 0.90 | 0.90 | 0.59 | 0.63 | 0.85 | 0.84 | 15.93 | 5.40 |
| Q8BFU8   | Vesicular glutamate transporter 3 OS=Mus musculus GN=Slc17a8 PE=2 SV=1 - [VGLU3_MOUSE]                      | 5.66  | 2  | 2  | 2  | 3   | 0.96 | 1.05 | 1.10 | 0.98 | 1.02 | 0.97 | 1.01 | 0.90 | 0.94 | 1.05 | 1.09 | 1.15 | 1.20 | 66.11 | 6.46 |
| Q91XM9   | Disks large homolog 2 OS=Mus musculus GN=Dlg2 PE=1 SV=2 - [DLG2_MOUSE]                                      | 52.82 | 11 | 28 | 33 | 139 | 0.97 | 0.91 | 0.95 | 0.97 | 1.01 | 0.90 | 0.92 | 0.90 | 0.94 | 0.85 | 0.89 | 0.89 | 0.93 | 94.82 | 6.24 |
| Q03265   | ATP synthase subunit alpha, mitochondrial OS=Mus musculus GN=Atp5a1 PE=1 SV=1 - [ATPA_MOUSE]                | 66.73 | 3  | 39 | 39 | 755 | 0.97 | 1.09 | 1.14 | 1.08 | 1.12 | 0.90 | 0.92 | 0.90 | 0.93 | 0.97 | 0.99 | 0.96 | 1.00 | 59.72 | 9.19 |
| Q61696   | Heat shock 70 kDa protein 1A OS=Mus musculus GN=Hspa1a PE=1 SV=2 - [HS71A_MOUSE]                            | 53.35 | 1  | 1  | 25 | 255 | 0.66 | 1.29 | 1.94 | 0.95 | 1.42 | 0.99 | 1.49 | 0.90 | 1.35 | 1.01 | 1.52 | 1.06 | 1.59 | 70.04 | 5.72 |



|          |                                                                                                              |       |    |    |    |     |      |      |      |      |      |      |      |      |      |      |      |      |      |        |      |
|----------|--------------------------------------------------------------------------------------------------------------|-------|----|----|----|-----|------|------|------|------|------|------|------|------|------|------|------|------|------|--------|------|
| P97300   | Neuroplastin OS=Mus musculus GN=Nptn PE=1 SV=3 - [NPTN_MOUSE]                                                | 34.01 | 5  | 7  | 15 | 235 | 1.03 | 1.05 | 1.05 | 1.14 | 1.14 | 0.94 | 0.92 | 0.90 | 0.89 | 0.99 | 0.93 | 0.98 | 0.98 | 44.35  | 7.74 |
| E0CZ04   | Gamma-glutamylaminocyclotransferase (Fragment) OS=Mus musculus GN=Ggact PE=2 SV=1 - [E0CZ04_MOUSE]           | 29.52 | 3  | 2  | 2  | 3   | 1.06 | 0.93 | 0.87 | 0.94 | 0.88 | 0.95 | 0.89 | 0.90 | 0.85 | 0.99 | 0.93 | 1.11 | 1.04 | 11.93  | 5.39 |
| D3Z5P0   | Serine/threonine-protein kinase BRSK1 OS=Mus musculus GN=Brsk1 PE=2 SV=1 - [D3Z5P0_MOUSE]                    | 22.90 | 6  | 8  | 11 | 20  | 0.93 | 1.01 | 1.13 | 1.04 | 1.12 | 0.97 | 1.06 | 0.90 | 0.98 | 0.96 | 1.13 | 0.94 | 0.99 | 77.15  | 9.17 |
| J3QM02   | Uncharacterized protein OS=Mus musculus GN=Gm10784 PE=4 SV=1 - [J3QM02_MOUSE]                                | 10.13 | 3  | 1  | 1  | 3   | 1.14 | 1.07 | 0.93 | 1.10 | 0.96 | 0.92 | 0.80 | 0.90 | 0.79 | 0.91 | 0.80 | 1.00 | 0.88 | 8.70   | 7.18 |
| F6TU77   | Protein Fam184a (Fragment) OS=Mus musculus GN=Fam184a PE=2 SV=1 - [F6TU77_MOUSE]                             | 9.17  | 5  | 6  | 6  | 15  | 1.01 | 0.86 | 0.90 | 0.87 | 0.92 | 0.92 | 0.98 | 0.90 | 0.94 | 0.86 | 0.84 | 0.84 | 0.83 | 117.03 | 5.74 |
| Q9WV27   | Sodium/potassium-transporting ATPase subunit alpha-4 OS=Mus musculus GN=Atpla4 PE=1 SV=3 - [AT1A4_MOUSE]     | 13.28 | 2  | 1  | 15 | 471 | 0.84 | 1.06 | 1.34 | 0.99 | 1.21 | 0.80 | 0.96 | 0.90 | 1.04 | 0.94 | 1.03 | 0.79 | 0.98 | 114.81 | 5.71 |
| Q7TQG1   | Pleckstrin homology domain-containing family A member 6 OS=Mus musculus GN=Plekha6 PE=1 SV=1 - [PKHA6_MOUSE] | 32.65 | 2  | 24 | 24 | 61  | 0.93 | 0.96 | 1.00 | 0.91 | 0.97 | 0.84 | 0.85 | 0.90 | 0.93 | 0.80 | 0.85 | 0.84 | 0.90 | 131.35 | 8.97 |
| Q64332-2 | Isoform 1b of Synapsin 2 OS=Mus musculus GN=Syn2 - [SYN2_MOUSE]                                              | 66.60 | 1  | 1  | 23 | 423 | 1.07 | 0.93 | 0.87 | 1.05 | 1.11 | 1.04 | 1.02 | 0.90 | 0.84 | 1.03 | 1.03 | 1.02 | 1.06 | 52.42  | 7.72 |
| P11499   | Heat shock protein HSP 90-beta OS=Mus musculus GN=Hsp90ab1 PE=1 SV=3 - [HS90B_MOUSE]                         | 58.15 | 5  | 25 | 41 | 539 | 1.01 | 0.95 | 0.94 | 1.11 | 1.08 | 0.90 | 0.89 | 0.90 | 0.91 | 0.96 | 0.94 | 0.96 | 0.96 | 83.23  | 5.03 |
| A3KGT2   | CUGBP Elav-like family member 2 (Fragment) OS=Mus musculus GN=Celf2 PE=2 SV=1 - [A3KGT2_MOUSE]               | 52.00 | 13 | 8  | 9  | 31  | 0.93 | 0.98 | 1.06 | 0.97 | 1.04 | 0.88 | 1.01 | 0.90 | 1.03 | 0.87 | 1.03 | 0.96 | 1.03 | 22.52  | 7.69 |
| Q5H8C4-2 | Isoform 2 of Vacuolar protein sorting-associated protein 13A OS=Mus musculus GN=Vps13a - [VP13A_MOUSE]       | 2.12  | 2  | 4  | 5  | 10  | 1.06 | 1.08 | 0.98 | 1.10 | 1.03 | 0.95 | 0.90 | 0.90 | 0.90 | 0.95 | 0.90 | 1.05 | 1.01 | 346.50 | 6.02 |

|        |                                                                                                              |       |   |   |   |    |      |      |      |      |      |      |      |      |      |      |      |      |      |        |      |
|--------|--------------------------------------------------------------------------------------------------------------|-------|---|---|---|----|------|------|------|------|------|------|------|------|------|------|------|------|------|--------|------|
| Q9D3D0 | Alpha-tocopherol transfer protein-like OS=Mus musculus GN=Ttpal PE=2 SV=3 [TTPAL_MOUSE]                      | 6.41  | 2 | 2 | 2 | 3  | 0.94 | 0.70 | 0.74 | 0.99 | 1.05 | 0.96 | 1.02 | 0.90 | 0.95 | 0.96 | 1.02 | 0.94 | 1.00 | 38.81  | 6.44 |
| Q80ZD8 | Amphoterin-induced protein 1 OS=Mus musculus GN=Amigo1 PE=1 SV=1 [AMGO1_MOUSE]                               | 15.04 | 3 | 6 | 6 | 14 | 0.93 | 0.76 | 0.82 | 1.09 | 1.08 | 0.98 | 0.98 | 0.90 | 0.91 | 0.83 | 0.86 | 0.79 | 0.80 | 55.31  | 6.86 |
| P47809 | Dual specificity mitogen-activated protein kinase kinase 4 OS=Mus musculus GN=Map2k4 PE=1 SV=2 [MP2K4_MOUSE] | 26.95 | 5 | 9 | 9 | 20 | 0.97 | 0.94 | 0.90 | 1.08 | 1.10 | 0.95 | 0.96 | 0.90 | 0.94 | 0.92 | 0.96 | 0.96 | 0.96 | 44.09  | 8.07 |
| Q000W5 | Guanylate-binding protein 10 OS=Mus musculus GN=Gbp10 PE=2 SV=1 [Q000W5_MOUSE]                               | 4.91  | 1 | 1 | 1 | 1  | 0.95 | 1.16 | 1.22 | 0.90 | 0.95 | 0.95 | 0.99 | 0.90 | 0.95 | 1.01 | 1.06 | 0.93 | 0.98 | 70.36  | 6.46 |
| Q8VE37 | Regulator of chromosome condensation OS=Mus musculus GN=Rec1 PE=1 SV=1 [RCC1_MOUSE]                          | 6.65  | 2 | 2 | 2 | 5  | 0.94 | 0.81 | 0.86 | 0.96 | 1.02 | 0.96 | 1.02 | 0.90 | 0.96 | 0.97 | 1.04 | 0.95 | 1.02 | 44.90  | 8.10 |
| Q5PPR2 | Exocyst complex component 1 OS=Mus musculus GN=Exoc1 PE=2 SV=1 [Q5PPR2_MOUSE]                                | 10.35 | 3 | 9 | 9 | 14 | 1.00 | 1.13 | 1.18 | 1.13 | 1.13 | 0.94 | 0.93 | 0.90 | 0.86 | 1.04 | 0.97 | 1.07 | 1.12 | 100.13 | 6.52 |
| Q80W47 | WD repeat domain phosphoinositide-interacting protein 2 OS=Mus musculus GN=Wipi2 PE=1 SV=1 [WIPI2_MOUSE]     | 17.75 | 2 | 4 | 4 | 7  | 0.95 | 0.92 | 0.89 | 1.02 | 1.06 | 0.86 | 0.94 | 0.90 | 0.88 | 1.04 | 0.98 | 1.14 | 1.25 | 48.45  | 5.86 |
| Q8BGH2 | Sorting and assembly machinery component 50 homolog OS=Mus musculus GN=Samm50 PE=1 SV=1 [SAM50_MOUSE]        | 21.11 | 1 | 8 | 8 | 14 | 1.07 | 1.03 | 0.94 | 1.20 | 1.12 | 0.88 | 0.85 | 0.90 | 0.82 | 0.94 | 0.81 | 1.06 | 0.97 | 51.83  | 6.80 |
| Q8K4K6 | Pantothenate kinase 1 OS=Mus musculus GN=Pank1 PE=1 SV=1 [PANK1_MOUSE]                                       | 6.02  | 2 | 2 | 2 | 4  | 1.07 | 0.80 | 0.75 | 1.15 | 1.07 | 1.04 | 0.97 | 0.90 | 0.84 | 0.97 | 0.91 | 1.02 | 0.95 | 60.05  | 8.03 |
| Q80XC3 | USP6 N-terminal-like protein OS=Mus musculus GN=Usp6nl PE=1 SV=2 [US6NL_MOUSE]                               | 3.54  | 2 | 2 | 2 | 7  | 0.89 | 1.02 | 1.11 | 0.95 | 0.96 | 0.97 | 1.01 | 0.90 | 1.07 | 0.91 | 1.05 | 0.91 | 1.06 | 93.52  | 9.13 |
| Q99J45 | Nuclear receptor-binding protein OS=Mus musculus GN=Nrbp1 PE=1 SV=1 [NRBP_MOUSE]                             | 6.36  | 2 | 2 | 2 | 6  | 0.98 | 0.97 | 0.77 | 0.97 | 1.03 | 0.95 | 0.97 | 0.90 | 1.01 | 0.88 | 0.90 | 0.78 | 0.76 | 59.83  | 5.08 |

|          |                                                                                                                                                       |       |   |    |    |    |      |      |      |      |      |      |      |      |      |      |      |      |      |        |      |
|----------|-------------------------------------------------------------------------------------------------------------------------------------------------------|-------|---|----|----|----|------|------|------|------|------|------|------|------|------|------|------|------|------|--------|------|
| O08797   | Protein Serpinb9<br>OS=Mus musculus<br>GN=Serpinb9 PE=2<br>SV=1 -<br>[O08797_MOUSE]                                                                   | 11.23 | 6 | 4  | 4  | 7  | 1.18 | 0.98 | 0.82 | 1.02 | 0.89 | 0.83 | 0.68 | 0.90 | 0.76 | 0.93 | 0.76 | 1.02 | 0.85 | 42.23  | 5.40 |
| G3X9N6   | Oxysterol-binding<br>protein OS=Mus<br>musculus GN=Osblp8<br>PE=3 SV=1 -<br>[G3X9N6_MOUSE]                                                            | 17.24 | 4 | 11 | 11 | 29 | 0.94 | 0.97 | 1.06 | 1.26 | 1.27 | 0.92 | 1.01 | 0.90 | 1.00 | 0.98 | 1.04 | 1.08 | 1.15 | 96.92  | 7.55 |
| Q9JIA6   | Galactokinase<br>OS=Mus musculus<br>GN=Galk1 PE=2<br>SV=1 -<br>[Q9JIA6_MOUSE]                                                                         | 9.18  | 2 | 3  | 3  | 7  | 0.88 | 1.18 | 1.25 | 1.00 | 1.13 | 0.83 | 0.93 | 0.90 | 1.02 | 1.02 | 1.16 | 1.00 | 1.07 | 42.27  | 5.26 |
| Q6P5E8   | Diacylglycerol kinase<br>theta OS=Mus<br>musculus GN=Dgkq<br>PE=1 SV=1 -<br>[DGKQ_MOUSE]                                                              | 7.07  | 3 | 6  | 6  | 12 | 1.05 | 1.31 | 1.06 | 1.07 | 0.96 | 0.93 | 0.88 | 0.90 | 0.87 | 0.99 | 0.94 | 1.14 | 1.10 | 102.19 | 7.52 |
| P04247   | Myoglobin OS=Mus<br>musculus GN=Mb<br>PE=1 SV=3 -<br>[MYG_MOUSE]                                                                                      | 20.78 | 1 | 2  | 2  | 2  | 0.73 | 0.74 | 0.68 | 0.75 | 1.02 | 1.34 | 1.82 | 0.90 | 1.23 | 0.92 | 0.85 | 1.03 | 0.96 | 17.06  | 7.62 |
| Q80TL7-2 | Isoform 2 of Protein<br>MON2 homolog<br>OS=Mus musculus<br>GN=Mon2 -<br>[MON2_MOUSE]                                                                  | 1.35  | 3 | 2  | 2  | 4  | 0.90 | 0.67 | 0.77 | 1.07 | 1.16 | 0.83 | 0.91 | 0.90 | 1.00 | 0.93 | 0.97 | 0.94 | 1.05 | 188.16 | 6.09 |
| O09111   | NADH dehydrogenase<br>[ubiquinone] 1 beta<br>subcomplex subunit<br>11, mitochondrial<br>OS=Mus musculus<br>GN=Ndufb11 PE=1<br>SV=2 -<br>[NDUBB_MOUSE] | 45.03 | 1 | 5  | 5  | 41 | 0.93 | 0.92 | 0.98 | 1.02 | 1.10 | 0.96 | 1.02 | 0.90 | 0.95 | 0.99 | 1.01 | 0.87 | 0.98 | 17.43  | 5.22 |
| Q3ULD5   | Methylcrotonoyl-CoA<br>carboxylase beta chain,<br>mitochondrial OS=Mus<br>musculus GN=Mccc2<br>PE=2 SV=1 -<br>[MCCB_MOUSE]                            | 22.02 | 1 | 8  | 8  | 15 | 0.98 | 1.06 | 1.10 | 1.03 | 1.05 | 1.02 | 0.94 | 0.90 | 0.94 | 1.06 | 1.04 | 1.09 | 1.05 | 61.34  | 8.00 |
| P35762   | CD81 antigen<br>OS=Mus musculus<br>GN=Cd81 PE=1 SV=2<br>-[CD81_MOUSE]                                                                                 | 27.54 | 1 | 3  | 3  | 42 | 1.00 | 1.05 | 1.03 | 1.09 | 1.05 | 0.83 | 0.88 | 0.90 | 0.89 | 0.88 | 0.88 | 0.84 | 0.85 | 25.80  | 5.83 |
| Q9WVL0   | Maleylacetoacetate<br>isomerase OS=Mus<br>musculus GN=Gstz1<br>PE=1 SV=1 -<br>[MAAL_MOUSE]                                                            | 26.39 | 1 | 4  | 4  | 9  | 1.11 | 1.01 | 0.89 | 1.27 | 1.21 | 1.05 | 0.97 | 0.90 | 0.88 | 1.12 | 0.87 | 0.99 | 0.96 | 24.26  | 7.85 |
| G3X8Y3   | N-alpha-<br>acetyltransferase 15,<br>NatA auxiliary subunit<br>OS=Mus musculus<br>GN=Naa15 PE=4<br>SV=1 -<br>[G3X8Y3_MOUSE]                           | 10.98 | 4 | 9  | 9  | 12 | 1.00 | 0.97 | 1.02 | 1.07 | 1.08 | 0.93 | 0.94 | 0.90 | 0.93 | 0.94 | 0.96 | 1.04 | 1.04 | 101.03 | 7.52 |
| Q8JZR6-2 | Isoform 2 of<br>Electroneutral sodium<br>bicarbonate exchanger<br>1 OS=Mus musculus<br>GN=Slc4a8 -<br>[S4A8_MOUSE]                                    | 13.40 | 2 | 8  | 9  | 18 | 0.90 | 0.94 | 1.00 | 1.04 | 1.12 | 0.77 | 0.85 | 0.90 | 1.06 | 0.83 | 0.94 | 0.88 | 0.94 | 116.61 | 6.83 |

|          |                                                                                                       |       |   |    |    |     |      |      |      |      |      |      |      |      |      |      |      |      |      |        |      |
|----------|-------------------------------------------------------------------------------------------------------|-------|---|----|----|-----|------|------|------|------|------|------|------|------|------|------|------|------|------|--------|------|
| B1ASU0   | Interleukin-1 receptor accessory protein-like 1 OS=Mus musculus GN=Il1rap1 PE=4 SV=1 - [B1ASU0_MOUSE] | 13.07 | 3 | 7  | 7  | 25  | 0.97 | 1.13 | 1.22 | 1.14 | 1.15 | 0.89 | 0.92 | 0.90 | 0.96 | 0.94 | 0.99 | 0.95 | 0.93 | 79.73  | 6.32 |
| Q9JMS2   | Missshapen-like kinase 1 OS=Mus musculus GN=Mink1 PE=1 SV=3 - [MINK1_MOUSE]                           | 24.39 | 9 | 16 | 20 | 69  | 0.97 | 1.05 | 1.05 | 0.92 | 0.98 | 0.85 | 0.91 | 0.90 | 0.92 | 0.92 | 0.97 | 0.94 | 1.01 | 147.20 | 7.44 |
| Q921F2   | TAR DNA-binding protein 43 OS=Mus musculus GN=Tardbp PE=1 SV=1 - [TADBP_MOUSE]                        | 19.81 | 4 | 1  | 6  | 12  | 0.77 | 1.01 | 1.30 | 0.83 | 1.07 | 0.73 | 0.93 | 0.90 | 1.17 | 0.85 | 1.10 | 0.97 | 1.25 | 44.52  | 6.70 |
| Q91XD6   | Vacuolar protein-sorting-associated protein 36 OS=Mus musculus GN=Vps36 PE=1 SV=1 - [VPS36_MOUSE]     | 16.06 | 1 | 6  | 6  | 12  | 0.93 | 1.04 | 1.13 | 1.05 | 1.08 | 0.95 | 0.91 | 0.90 | 0.92 | 0.98 | 1.01 | 1.01 | 1.12 | 43.71  | 7.15 |
| E9QLP0   | Tubulin polyglutamylase complex subunit 2 OS=Mus musculus GN=Tpgs2 PE=2 SV=1 - [E9QLP0_MOUSE]         | 7.09  | 2 | 1  | 1  | 5   | 0.84 | 0.69 | 0.82 | 1.01 | 1.17 | 0.87 | 1.00 | 0.90 | 1.08 | 0.85 | 1.01 | 0.82 | 0.95 | 33.21  | 7.24 |
| Q99KI0   | Aconitate hydratase, mitochondrial OS=Mus musculus GN=Aco2 PE=1 SV=1 - [ACON_MOUSE]                   | 59.49 | 1 | 43 | 43 | 378 | 0.96 | 0.97 | 1.03 | 1.04 | 1.08 | 0.94 | 0.98 | 0.90 | 0.97 | 0.96 | 0.99 | 0.95 | 1.00 | 85.41  | 7.93 |
| P35585   | AP-1 complex subunit mu-1 OS=Mus musculus GN=Ap1m1 PE=1 SV=3 - [AP1M1_MOUSE]                          | 35.46 | 4 | 12 | 12 | 29  | 0.98 | 1.10 | 1.08 | 0.99 | 0.97 | 0.88 | 0.88 | 0.90 | 0.92 | 0.91 | 0.90 | 1.00 | 0.94 | 48.51  | 7.30 |
| Q3TY99   | Transducin-like enhancer protein 3 OS=Mus musculus GN=The3 PE=2 SV=1 - [Q3TY99_MOUSE]                 | 2.39  | 4 | 1  | 1  | 2   | 1.00 | 1.28 | 1.27 | 0.95 | 0.95 | 0.96 | 0.96 | 0.91 | 0.90 | 0.92 | 0.92 | 1.06 | 1.07 | 76.45  | 7.24 |
| F8VPK5   | Rho-associated protein kinase 2 OS=Mus musculus GN=Rock2 PE=2 SV=1 - [F8VPK5_MOUSE]                   | 42.44 | 3 | 43 | 48 | 144 | 0.92 | 1.00 | 1.10 | 0.96 | 1.01 | 0.86 | 0.94 | 0.91 | 1.02 | 0.86 | 0.96 | 0.87 | 0.93 | 160.51 | 5.99 |
| O88342   | WD repeat-containing protein 1 OS=Mus musculus GN=Wdr1 PE=1 SV=3 - [WDR1_MOUSE]                       | 47.69 | 1 | 22 | 22 | 118 | 0.97 | 0.93 | 0.94 | 0.95 | 0.98 | 0.89 | 0.88 | 0.91 | 0.89 | 0.88 | 0.88 | 0.92 | 0.96 | 66.36  | 6.60 |
| Q9Z0P5-2 | Isoform 2 of Twinfilin-2 OS=Mus musculus GN=Twf2 - [TWF2_MOUSE]                                       | 42.36 | 2 | 9  | 9  | 48  | 1.04 | 0.90 | 0.92 | 1.04 | 1.03 | 0.88 | 0.91 | 0.91 | 0.89 | 0.83 | 0.83 | 0.85 | 0.87 | 39.29  | 6.70 |

|          |                                                                                                                     |       |   |    |    |    |      |      |      |      |      |      |      |      |      |      |      |      |      |        |      |
|----------|---------------------------------------------------------------------------------------------------------------------|-------|---|----|----|----|------|------|------|------|------|------|------|------|------|------|------|------|------|--------|------|
| Q8R3B1   | 1-phosphatidylinositol 4,5-bisphosphate phosphodiesterase delta 1 OS=Mus musculus GN=Pld1 PE=2 SV=2 - [PLCD1_MOUSE] | 15.34 | 1 | 8  | 8  | 24 | 0.90 | 1.05 | 1.21 | 1.03 | 1.12 | 0.88 | 0.94 | 0.91 | 0.98 | 0.93 | 0.96 | 0.97 | 1.04 | 85.82  | 6.21 |
| Q99PU8-2 | Isoform 2 of Putative ATP-dependent RNA helicase DHX30 OS=Mus musculus GN=Dhx30 - [DHX30_MOUSE]                     | 9.88  | 7 | 10 | 10 | 16 | 0.98 | 1.06 | 1.11 | 1.10 | 1.12 | 0.97 | 0.99 | 0.91 | 0.91 | 0.99 | 1.03 | 1.03 | 1.10 | 133.98 | 8.82 |
| Q80UP3   | Diacylglycerol kinase zeta OS=Mus musculus GN=Dgkz PE=1 SV=2 - [DGKZ_MOUSE]                                         | 17.98 | 4 | 12 | 12 | 24 | 0.95 | 0.95 | 1.04 | 0.90 | 0.98 | 0.93 | 0.96 | 0.91 | 1.00 | 0.89 | 0.94 | 0.89 | 0.97 | 103.97 | 8.09 |
| F6RJC1   | Teneurin-3 (Fragment) OS=Mus musculus GN=Tenm3 PE=4 SV=1 - [F6RJC1_MOUSE]                                           | 2.21  | 5 | 4  | 4  | 7  | 1.13 | 1.16 | 1.07 | 1.12 | 0.98 | 0.96 | 0.89 | 0.91 | 0.80 | 1.01 | 0.89 | 1.05 | 0.93 | 262.60 | 6.09 |
| Q8K358   | Phosphatidylinositol glycan anchor biosynthesis class U protein OS=Mus musculus GN=Pigu PE=2 SV=4 - [PIGU_MOUSE]    | 2.30  | 2 | 1  | 1  | 2  | 1.04 | 0.95 | 0.91 | 1.19 | 1.14 | 0.83 | 0.79 | 0.91 | 0.87 | 0.93 | 0.90 | 1.01 | 0.97 | 49.77  | 7.72 |
| Q9EQP2   | EH domain-containing protein 4 OS=Mus musculus GN=Ehd4 PE=1 SV=1 - [EHD4_MOUSE]                                     | 26.99 | 1 | 9  | 11 | 18 | 0.99 | 0.97 | 0.93 | 1.07 | 1.04 | 1.00 | 0.97 | 0.91 | 0.89 | 1.09 | 1.05 | 1.10 | 1.02 | 61.44  | 6.76 |
| Q9WV60   | Glycogen synthase kinase-3 beta OS=Mus musculus GN=Gsk3b PE=1 SV=2 - [GSK3B_MOUSE]                                  | 38.10 | 2 | 7  | 10 | 31 | 1.01 | 1.04 | 1.00 | 1.05 | 1.02 | 0.97 | 0.92 | 0.91 | 0.94 | 1.05 | 1.00 | 1.06 | 1.01 | 46.68  | 8.78 |
| E0CZ69   | FYVE, RhoGEF and PH domain-containing protein 4 (Fragment) OS=Mus musculus GN=Fg44 PE=2 SV=1 - [E0CZ69_MOUSE]       | 4.83  | 6 | 2  | 2  | 2  | 0.92 | 1.26 | 1.26 | 0.92 | 0.99 | 0.94 | 1.02 | 0.91 | 0.98 | 0.98 | 1.06 | 0.87 | 0.87 | 43.71  | 5.22 |
| Q71LX4   | Talin-2 OS=Mus musculus GN=Tln2 PE=1 SV=3 - [TLN2_MOUSE]                                                            | 29.18 | 2 | 41 | 48 | 91 | 0.97 | 1.07 | 1.07 | 1.10 | 1.14 | 0.95 | 0.97 | 0.91 | 0.95 | 1.00 | 1.03 | 1.08 | 1.11 | 253.46 | 5.80 |
| Q6VNB8   | WD repeat and FYVE domain-containing protein 3 OS=Mus musculus GN=Wdfy3 PE=1 SV=1 - [WDFY3_MOUSE]                   | 2.68  | 4 | 7  | 7  | 13 | 0.93 | 1.13 | 1.14 | 1.06 | 1.13 | 0.87 | 1.00 | 0.91 | 1.04 | 0.97 | 1.13 | 1.05 | 1.25 | 392.09 | 6.80 |
| Q61411   | GTPase HRas OS=Mus musculus GN=Hras1 PE=1 SV=2 - [RASH_MOUSE]                                                       | 66.67 | 5 | 5  | 10 | 51 | 1.06 | 0.99 | 0.94 | 1.10 | 1.01 | 0.97 | 0.94 | 0.91 | 0.88 | 0.92 | 0.85 | 0.88 | 0.89 | 21.28  | 5.31 |

|        |                                                                                                                     |       |   |    |    |    |      |      |      |      |      |      |      |      |      |      |      |      |      |        |      |
|--------|---------------------------------------------------------------------------------------------------------------------|-------|---|----|----|----|------|------|------|------|------|------|------|------|------|------|------|------|------|--------|------|
| Q8BR88 | Probable phospholipid-transporting ATPase IA OS=Mus musculus GN=Atp8a1 PE=2 SV=1 - [Q8BR88_MOUSE]                   | 24.57 | 8 | 23 | 25 | 77 | 1.17 | 1.22 | 1.04 | 1.17 | 0.97 | 0.94 | 0.80 | 0.91 | 0.76 | 0.99 | 0.85 | 1.07 | 0.90 | 131.33 | 6.84 |
| Q9Z0Y1 | Dynactin subunit 3 OS=Mus musculus GN=Dctn3 PE=2 SV=2 - [DCTN3_MOUSE]                                               | 23.66 | 2 | 4  | 4  | 10 | 0.84 | 1.01 | 1.10 | 0.94 | 1.07 | 0.93 | 1.08 | 0.91 | 1.02 | 0.92 | 1.01 | 0.91 | 1.07 | 20.97  | 6.06 |
| Q9EPR4 | Solute carrier family 23 member 2 OS=Mus musculus GN=Slc23a2 PE=1 SV=2 - [S23A2_MOUSE]                              | 10.65 | 3 | 5  | 5  | 13 | 0.91 | 0.89 | 0.99 | 1.13 | 1.24 | 0.96 | 0.99 | 0.91 | 0.96 | 1.01 | 1.08 | 0.92 | 1.03 | 70.00  | 7.50 |
| O54865 | Guanylate cyclase soluble subunit beta-1 OS=Mus musculus GN=Gucy1b3 PE=2 SV=1 - [GCYB1_MOUSE]                       | 24.52 | 1 | 13 | 13 | 32 | 0.97 | 1.03 | 1.08 | 1.12 | 1.12 | 0.85 | 0.85 | 0.91 | 0.95 | 0.96 | 0.98 | 1.05 | 1.06 | 70.55  | 5.31 |
| Q7TT37 | Elongator complex protein 1 OS=Mus musculus GN=lkbkap PE=2 SV=2 - [ELP1_MOUSE]                                      | 5.10  | 1 | 5  | 5  | 8  | 0.98 | 1.10 | 1.11 | 1.16 | 1.09 | 0.82 | 0.70 | 0.91 | 0.89 | 0.98 | 0.93 | 1.05 | 1.15 | 149.49 | 6.00 |
| P30416 | Peptidyl-prolyl cis-trans isomerase FKBP4 OS=Mus musculus GN=Fkbp4 PE=1 SV=5 - [FKBP4_MOUSE]                        | 23.36 | 4 | 9  | 9  | 43 | 0.97 | 1.04 | 1.08 | 0.97 | 0.97 | 0.89 | 0.93 | 0.91 | 0.90 | 0.94 | 0.93 | 0.95 | 0.96 | 51.54  | 5.72 |
| Q8BLF1 | Neutral cholesterol ester hydrolase 1 OS=Mus musculus GN=Nceh1 PE=1 SV=1 - [NCEH1_MOUSE]                            | 20.59 | 2 | 8  | 8  | 21 | 0.95 | 1.06 | 1.05 | 1.11 | 1.15 | 0.92 | 0.92 | 0.91 | 0.86 | 0.88 | 0.95 | 0.94 | 0.99 | 45.71  | 7.05 |
| O35409 | Glutamate carboxypeptidase 2 OS=Mus musculus GN=Folh1 PE=2 SV=2 - [FOLH1_MOUSE]                                     | 15.96 | 2 | 8  | 8  | 14 | 1.10 | 0.98 | 0.96 | 1.08 | 0.96 | 0.87 | 0.82 | 0.91 | 0.82 | 0.95 | 0.84 | 0.92 | 0.85 | 84.52  | 8.10 |
| O35598 | Disintegrin and metalloproteinase domain-containing protein 10 OS=Mus musculus GN=Adam10 PE=1 SV=2 - [ADA10_MOUSE]  | 10.28 | 2 | 6  | 6  | 13 | 1.06 | 1.10 | 1.03 | 1.05 | 1.03 | 0.87 | 0.81 | 0.91 | 0.88 | 0.89 | 0.85 | 1.01 | 0.98 | 83.91  | 7.94 |
| Q9CWX8 | Isoform 2 of NADH dehydrogenase [ubiquinone] complex I, assembly factor 7 OS=Mus musculus GN=Ndufa7 - [NDUF7_MOUSE] | 7.05  | 2 | 2  | 2  | 4  | 0.96 | 0.91 | 0.95 | 1.02 | 1.06 | 0.93 | 0.97 | 0.91 | 0.94 | 0.91 | 0.95 | 1.00 | 1.05 | 42.50  | 6.99 |
| Q9EQF6 | Dihydropyrimidinase-related protein 5 OS=Mus musculus GN=Dpys15 PE=1 SV=1 - [DPYLS_MOUSE]                           | 53.37 | 2 | 19 | 19 | 54 | 1.09 | 1.03 | 1.02 | 1.05 | 0.98 | 0.99 | 0.95 | 0.91 | 0.90 | 1.01 | 0.95 | 1.06 | 1.02 | 61.48  | 7.09 |

|          |                                                                                                                     |       |    |    |    |     |      |      |      |      |      |      |      |      |      |      |      |      |      |        |      |
|----------|---------------------------------------------------------------------------------------------------------------------|-------|----|----|----|-----|------|------|------|------|------|------|------|------|------|------|------|------|------|--------|------|
| P49442   | Inositol polyphosphate 1-phosphatase<br>OS=Mus musculus<br>GN=Inpp1 PE=1 SV=2<br>-[INPP_MOUSE]                      | 27.27 | 4  | 8  | 8  | 21  | 0.89 | 0.85 | 0.99 | 1.04 | 1.13 | 0.98 | 1.11 | 0.91 | 1.07 | 0.97 | 1.19 | 0.91 | 1.09 | 43.32  | 5.01 |
| E9QNG1   | Intersectin-2 OS=Mus musculus<br>GN=Itsn2 PE=2 SV=1<br>-[E9QNG1_MOUSE]                                              | 13.51 | 6  | 13 | 18 | 45  | 0.95 | 0.96 | 1.06 | 0.94 | 0.99 | 0.89 | 0.96 | 0.91 | 1.03 | 0.88 | 0.92 | 0.93 | 0.97 | 188.66 | 8.25 |
| G3UYD0   | General transcription factor II-1 OS=Mus musculus<br>GN=Gtf2i PE=2 SV=1<br>-[G3UYD0_MOUSE]                          | 12.27 | 14 | 8  | 8  | 9   | 0.96 | 0.97 | 1.01 | 1.01 | 1.02 | 0.98 | 0.98 | 0.91 | 0.99 | 0.97 | 1.05 | 0.97 | 1.00 | 103.01 | 8.81 |
| Q8BXL9   | Isoform 3 of Intermediate filament family orphan 1<br>OS=Mus musculus<br>GN=Iffo1<br>-[IFFO1_MOUSE]                 | 4.35  | 8  | 1  | 1  | 4   | 1.18 | 0.89 | 0.75 | 1.03 | 0.87 | 0.87 | 0.73 | 0.91 | 0.77 | 1.07 | 0.90 | 0.86 | 0.73 | 42.19  | 4.61 |
| Q3UGX2   | Spectrin beta 1 OS=Mus musculus<br>GN=Sptb PE=2 SV=1<br>-[Q3UGX2_MOUSE]                                             | 28.34 | 6  | 42 | 49 | 134 | 0.91 | 1.00 | 1.08 | 1.05 | 1.16 | 0.93 | 1.00 | 0.91 | 1.00 | 0.96 | 1.08 | 1.02 | 1.18 | 267.93 | 5.49 |
| Q3TWW4   | AP-2 complex subunit mu OS=Mus musculus<br>GN=Ap2m1 PE=2 SV=1<br>-[Q3TWW4_MOUSE]                                    | 43.65 | 2  | 20 | 20 | 92  | 1.00 | 1.05 | 1.06 | 1.14 | 1.14 | 0.87 | 0.85 | 0.91 | 0.87 | 0.98 | 0.97 | 1.00 | 1.01 | 49.36  | 9.54 |
| Q9CQW1   | Synaptobrevin homolog YKT6 OS=Mus musculus<br>GN=Ykt6 PE=2 SV=1<br>-[YKT6_MOUSE]                                    | 58.59 | 1  | 10 | 10 | 19  | 1.00 | 0.96 | 0.92 | 1.08 | 1.08 | 0.95 | 0.97 | 0.91 | 0.95 | 0.92 | 1.02 | 0.91 | 0.92 | 22.30  | 6.35 |
| Q60738   | Zinc transporter 1 OS=Mus musculus<br>GN=Slc30a1 PE=2 SV=1<br>-[ZNT1_MOUSE]                                         | 12.92 | 1  | 4  | 4  | 6   | 1.03 | 0.88 | 0.85 | 1.06 | 1.03 | 0.92 | 0.85 | 0.91 | 0.86 | 0.97 | 0.90 | 0.96 | 0.96 | 54.68  | 6.62 |
| E9Q585   | Protein Slc4a1ap OS=Mus musculus<br>GN=Slc4a1ap PE=2 SV=1<br>-[E9Q585_MOUSE]                                        | 13.71 | 3  | 6  | 6  | 10  | 0.90 | 0.66 | 0.76 | 0.86 | 0.95 | 0.98 | 1.12 | 0.91 | 0.99 | 0.95 | 1.05 | 0.84 | 0.92 | 79.62  | 5.10 |
| Q9CYH5   | Glucose-fructose oxidoreductase domain-containing protein 2 OS=Mus musculus<br>GN=Gfod2 PE=2 SV=1<br>-[GFOD2_MOUSE] | 8.83  | 1  | 1  | 1  | 1   | 1.54 | 1.07 | 0.70 | 1.23 | 0.80 | 1.41 | 0.92 | 0.91 | 0.59 | 1.37 | 0.89 | 0.79 | 0.52 | 42.21  | 6.25 |
| Q3UHI4   | Protein TMED8 OS=Mus musculus<br>GN=Tmed8 PE=1 SV=1<br>-[TMED8_MOUSE]                                               | 18.71 | 1  | 3  | 3  | 9   | 0.96 | 0.89 | 0.97 | 0.94 | 0.97 | 0.88 | 0.92 | 0.91 | 1.01 | 0.93 | 0.98 | 1.01 | 1.07 | 35.76  | 4.74 |
| Q8BGN8   | Synaptoporin OS=Mus musculus<br>GN=Synpr PE=1 SV=1<br>-[SYNPR_MOUSE]                                                | 14.34 | 3  | 3  | 4  | 8   | 0.99 | 0.99 | 1.00 | 1.01 | 1.13 | 0.88 | 0.82 | 0.91 | 0.94 | 0.89 | 0.91 | 0.99 | 1.00 | 29.21  | 6.30 |
| Q9Z2I4-2 | Isoform 2 of Roundabout homolog 3 OS=Mus musculus<br>GN=Robo3<br>-[ROBO3_MOUSE]                                     | 3.50  | 4  | 1  | 2  | 2   | 1.21 | 0.90 | 0.75 | 0.90 | 0.74 | 0.98 | 0.81 | 0.91 | 0.75 | 1.14 | 0.95 | 1.18 | 0.98 | 143.35 | 7.03 |

|        |                                                                                                                                   |       |   |    |    |    |      |      |      |      |      |      |      |      |      |      |      |      |      |        |      |
|--------|-----------------------------------------------------------------------------------------------------------------------------------|-------|---|----|----|----|------|------|------|------|------|------|------|------|------|------|------|------|------|--------|------|
| F8VQF9 | Trafficking protein particle complex subunit 10 OS=Mus musculus GN=Trappc10 PE=4 SV=1 - [F8VQF9_MOUSE]                            | 3.58  | 2 | 3  | 3  | 4  | 0.92 | 1.15 | 1.28 | 1.02 | 1.11 | 0.87 | 0.90 | 0.91 | 0.96 | 1.03 | 1.01 | 0.99 | 1.08 | 141.40 | 5.92 |
| B7ZWL1 | CCR4-NOT transcription complex subunit 1 OS=Mus musculus GN=Cnot1 PE=2 SV=1 - [B7ZWL1_MOUSE]                                      | 3.65  | 4 | 8  | 8  | 16 | 0.96 | 0.92 | 0.89 | 1.14 | 1.18 | 0.97 | 0.98 | 0.91 | 0.91 | 0.99 | 1.02 | 1.12 | 1.05 | 260.79 | 7.02 |
| Q9D6Z1 | Nucleolar protein 56 OS=Mus musculus GN=Nop56 PE=1 SV=2 - [NOP56_MOUSE]                                                           | 20.00 | 8 | 9  | 9  | 19 | 1.02 | 1.09 | 0.98 | 1.06 | 1.05 | 0.92 | 1.01 | 0.91 | 0.94 | 0.97 | 0.96 | 0.97 | 0.95 | 64.42  | 9.14 |
| Q9QZH6 | Evolutionarily conserved signaling intermediate in Toll pathway, mitochondrial OS=Mus musculus GN=Ecsit PE=1 SV=2 - [ECSIT_MOUSE] | 6.90  | 2 | 3  | 3  | 5  | 1.02 | 1.22 | 1.15 | 1.16 | 1.11 | 0.94 | 0.93 | 0.91 | 0.89 | 0.91 | 0.92 | 1.04 | 1.01 | 49.77  | 6.60 |
| Q8BH44 | Coronin-2B OS=Mus musculus GN=Coro2b PE=2 SV=2 - [COR2B_MOUSE]                                                                    | 35.00 | 4 | 13 | 13 | 24 | 0.95 | 0.89 | 1.00 | 1.00 | 1.08 | 0.96 | 0.97 | 0.91 | 0.98 | 0.89 | 0.90 | 0.88 | 0.99 | 54.90  | 8.27 |
| O89017 | Legumin OS=Mus musculus GN=Lgmn PE=1 SV=1 - [LGMN_MOUSE]                                                                          | 18.62 | 1 | 6  | 6  | 15 | 0.89 | 0.86 | 0.90 | 0.81 | 0.92 | 0.86 | 0.99 | 0.91 | 0.98 | 0.79 | 0.85 | 0.73 | 0.84 | 49.34  | 6.39 |
| Q9CQE7 | Endoplasmic reticulum-Golgi intermediate compartment protein 3 OS=Mus musculus GN=Ergic3 PE=2 SV=1 - [ERGI3_MOUSE]                | 8.09  | 4 | 3  | 3  | 5  | 0.98 | 1.24 | 1.27 | 1.15 | 1.15 | 0.89 | 0.92 | 0.91 | 0.92 | 0.94 | 0.95 | 0.97 | 0.87 | 43.18  | 6.47 |
| P61079 | Ubiquitin-conjugating enzyme E2 D3 OS=Mus musculus GN=Ube2d3 PE=1 SV=1 - [UB2D3_MOUSE]                                            | 40.82 | 3 | 1  | 4  | 17 | 0.86 | 0.98 | 1.13 | 0.98 | 1.13 | 0.96 | 1.10 | 0.91 | 1.05 | 0.96 | 1.11 | 0.87 | 1.01 | 16.68  | 7.80 |
| Q6NXH3 | Isoform 3 of Vasculin OS=Mus musculus GN=Gpbb1 - [GPBP1_MOUSE]                                                                    | 13.59 | 3 | 3  | 3  | 4  | 0.86 | 0.76 | 0.88 | 0.85 | 0.99 | 1.06 | 1.22 | 0.91 | 1.05 | 0.95 | 1.11 | 0.82 | 0.95 | 41.28  | 5.91 |
| G3UXL2 | Ribose-phosphate pyrophosphokinase OS=Mus musculus GN=Prps113 PE=2 SV=1 - [G3UXL2_MOUSE]                                          | 34.59 | 2 | 6  | 9  | 19 | 1.05 | 1.11 | 1.06 | 1.08 | 0.93 | 0.92 | 0.85 | 0.91 | 0.85 | 1.04 | 0.94 | 1.30 | 1.19 | 34.80  | 6.98 |
| O55013 | Trafficking protein particle complex subunit 3 OS=Mus musculus GN=Trappc3 PE=1 SV=1 - [TPPC3_MOUSE]                               | 24.44 | 1 | 6  | 6  | 13 | 1.08 | 1.19 | 1.15 | 0.90 | 0.98 | 0.85 | 0.83 | 0.91 | 0.77 | 0.93 | 0.87 | 0.95 | 0.92 | 20.29  | 4.96 |



|        |                                                                                                                |       |   |    |    |    |      |      |      |      |      |      |      |      |      |      |      |      |      |        |      |
|--------|----------------------------------------------------------------------------------------------------------------|-------|---|----|----|----|------|------|------|------|------|------|------|------|------|------|------|------|------|--------|------|
| E9Q175 | Unconventional myosin VI OS=Mus musculus GN=Myo6 PE=2 SV=1 - [E9Q175_MOUSE]                                    | 15.40 | 5 | 16 | 16 | 30 | 0.96 | 0.98 | 1.06 | 1.05 | 1.09 | 0.91 | 0.95 | 0.91 | 0.99 | 0.96 | 1.00 | 1.01 | 1.12 | 144.68 | 8.51 |
| Q9JI19 | Acidic fibroblast growth factor intracellular-binding protein OS=Mus musculus GN=Fibp PE=2 SV=1 - [FIBP_MOUSE] | 2.24  | 2 | 1  | 1  | 1  | 0.99 | 1.09 | 1.10 | 1.11 | 1.13 | 1.05 | 1.06 | 0.91 | 0.91 | 1.13 | 1.14 | 1.03 | 1.04 | 41.18  | 6.76 |
| Q9Z268 | RasGAP-activating-like protein 1 OS=Mus musculus GN=Rasal1 PE=2 SV=2 - [RASL1_MOUSE]                           | 28.41 | 2 | 15 | 15 | 48 | 1.01 | 1.20 | 1.23 | 1.21 | 1.13 | 0.99 | 0.97 | 0.91 | 0.92 | 1.03 | 1.04 | 1.13 | 1.13 | 89.34  | 6.37 |
| O09172 | Glutamate-cysteine ligase regulatory subunit OS=Mus musculus GN=Gclm PE=2 SV=1 - [GSH0_MOUSE]                  | 26.64 | 3 | 5  | 5  | 12 | 0.90 | 1.08 | 1.18 | 1.18 | 1.21 | 0.97 | 0.94 | 0.91 | 0.93 | 1.11 | 1.22 | 1.06 | 1.19 | 30.52  | 5.52 |
| Q61809 | Leucine-rich repeat neuronal protein 1 OS=Mus musculus GN=Lrm1 PE=2 SV=1 - [LRRN1_MOUSE]                       | 2.09  | 1 | 1  | 1  | 2  | 1.48 | 1.32 | 0.89 | 1.20 | 0.81 | 0.91 | 0.61 | 0.91 | 0.61 | 1.16 | 0.78 | 1.24 | 0.84 | 80.50  | 6.15 |
| Q9CQJ1 | HIG1 domain family member 2A OS=Mus musculus GN=Higd2a PE=2 SV=1 - [HIG2A_MOUSE]                               | 19.81 | 1 | 1  | 1  | 1  | 0.72 | 0.50 | 0.68 | 0.88 | 1.21 | 0.53 | 0.73 | 0.91 | 1.25 | 0.75 | 1.03 | 0.54 | 0.75 | 11.36  | 9.57 |
| Q8K0D5 | Elongation factor G, mitochondrial OS=Mus musculus GN=Gfm1 PE=2 SV=1 - [EFGM_MOUSE]                            | 15.98 | 2 | 9  | 9  | 13 | 0.94 | 0.91 | 0.99 | 1.01 | 1.10 | 0.91 | 0.93 | 0.91 | 0.94 | 0.87 | 0.98 | 0.97 | 0.99 | 83.50  | 6.92 |
| F8WHV1 | Mitotic spindle-associated MMXD complex subunit MIP18 OS=Mus musculus GN=Fam96b PE=2 SV=1 - [F8WHV1_MOUSE]     | 31.62 | 2 | 2  | 2  | 5  | 0.89 | 0.93 | 0.89 | 0.96 | 0.94 | 1.16 | 1.31 | 0.91 | 1.02 | 1.05 | 1.30 | 1.14 | 1.43 | 14.99  | 5.45 |
| Q02257 | Junction plakoglobin OS=Mus musculus GN=Jup PE=1 SV=3 - [PLAK_MOUSE]                                           | 12.08 | 1 | 4  | 7  | 16 | 0.92 | 1.04 | 1.11 | 1.30 | 1.48 | 0.85 | 0.85 | 0.91 | 0.84 | 0.88 | 1.01 | 1.04 | 1.20 | 81.75  | 6.14 |
| B9EJ19 | Transmembrane protein 229A OS=Mus musculus GN=Tmem229a PE=2 SV=1 - [T229A_MOUSE]                               | 3.23  | 1 | 1  | 1  | 2  | 1.01 | 1.20 | 1.18 | 1.21 | 1.20 | 0.91 | 0.89 | 0.91 | 0.90 | 0.96 | 0.95 | 0.98 | 0.97 | 41.50  | 9.35 |
| E0CYX9 | Coiled-coil domain-containing protein 127 (Fragment) OS=Mus musculus GN=Ccdc127 PE=2 SV=1 - [E0CYX9_MOUSE]     | 15.55 | 4 | 3  | 3  | 6  | 1.01 | 1.20 | 1.17 | 1.11 | 1.10 | 0.82 | 0.79 | 0.91 | 0.88 | 1.03 | 1.01 | 1.17 | 1.15 | 27.72  | 8.76 |

|          |                                                                                                                                                |       |   |    |    |    |      |      |      |      |      |      |      |      |      |      |      |      |      |        |      |
|----------|------------------------------------------------------------------------------------------------------------------------------------------------|-------|---|----|----|----|------|------|------|------|------|------|------|------|------|------|------|------|------|--------|------|
| Q6P6P5   | Slc12a6 protein<br>OS=Mus musculus<br>GN=Gm21985 PE=2<br>SV=1 -<br>[Q6P6P5_MOUSE]                                                              | 13.65 | 5 | 7  | 11 | 42 | 1.04 | 0.99 | 0.87 | 0.97 | 0.98 | 0.97 | 0.91 | 0.91 | 0.86 | 0.93 | 0.87 | 0.82 | 0.76 | 122.59 | 7.49 |
| P20352   | Tissue factor OS=Mus<br>musculus GN=F3<br>PE=1 SV=2 -<br>[TF_MOUSE]                                                                            | 5.78  | 1 | 1  | 1  | 3  | 0.86 | 0.94 | 1.09 | 0.85 | 0.98 | 0.95 | 1.10 | 0.91 | 1.05 | 1.00 | 1.16 | 0.84 | 0.98 | 32.91  | 9.32 |
| Q9DBL1   | Short/branched chain<br>specific acyl-CoA<br>dehydrogenase,<br>mitochondrial OS=Mus<br>musculus GN=Acadsb<br>PE=1 SV=1 -<br>[ACDSB_MOUSE]      | 15.97 | 2 | 5  | 5  | 10 | 1.03 | 1.06 | 1.22 | 1.12 | 1.03 | 0.80 | 0.81 | 0.91 | 0.76 | 0.94 | 0.92 | 1.03 | 0.99 | 47.84  | 7.87 |
| P98203-4 | Isoform 4 of Armadillo<br>repeat protein deleted<br>in velo-cardio-facial<br>syndrome homolog<br>OS=Mus musculus<br>GN=Arvcf -<br>[ARVC_MOUSE] | 10.76 | 5 | 5  | 5  | 11 | 1.02 | 1.10 | 1.16 | 1.09 | 1.02 | 0.93 | 0.92 | 0.91 | 0.98 | 0.97 | 1.03 | 0.99 | 1.03 | 97.11  | 6.79 |
| BIARV6   | Protein Gm13125<br>OS=Mus musculus<br>GN=Gm13125 PE=4<br>SV=1 -<br>[BIARV6_MOUSE]                                                              | 3.56  | 1 | 1  | 1  | 1  | 0.64 | 0.53 | 0.84 | 0.92 | 1.45 | 0.88 | 1.38 | 0.91 | 1.43 | 0.87 | 1.37 | 0.75 | 1.19 | 55.07  | 8.34 |
| P10852   | 4F2 cell-surface<br>antigen heavy chain<br>OS=Mus musculus<br>GN=Slc3a2 PE=1<br>SV=1 - [4F2_MOUSE]                                             | 37.45 | 2 | 18 | 18 | 81 | 1.01 | 1.05 | 0.93 | 1.12 | 1.06 | 0.94 | 0.84 | 0.91 | 0.90 | 0.96 | 0.93 | 0.96 | 0.90 | 58.30  | 5.91 |
| F8WHJ1   | FTS and Hook-<br>interacting protein<br>OS=Mus musculus<br>GN=Fam160a2 PE=2<br>SV=1 -<br>[F8WHJ1_MOUSE]                                        | 10.45 | 6 | 6  | 6  | 11 | 0.89 | 1.12 | 1.26 | 1.06 | 1.08 | 1.00 | 1.09 | 0.91 | 1.02 | 1.06 | 1.07 | 1.13 | 1.28 | 99.09  | 6.44 |
| Q8CIB5   | Fermitin family<br>homolog 2 OS=Mus<br>musculus GN=Ferm2<br>PE=1 SV=1 -<br>[FERM2_MOUSE]                                                       | 18.38 | 2 | 8  | 9  | 18 | 0.98 | 1.11 | 1.12 | 1.04 | 1.02 | 0.93 | 0.95 | 0.91 | 0.84 | 0.92 | 0.85 | 0.98 | 0.92 | 77.75  | 6.70 |
| P63168   | Dynein light chain 1,<br>cytoplasmic OS=Mus<br>musculus GN=Dynl1<br>PE=1 SV=1 -<br>[DYLL1_MOUSE]                                               | 67.42 | 2 | 3  | 7  | 73 | 0.91 | 0.82 | 0.97 | 0.86 | 0.92 | 0.85 | 0.91 | 0.91 | 0.99 | 0.85 | 0.81 | 0.85 | 0.97 | 10.36  | 7.40 |
| Q9QYY8   | Spastin OS=Mus<br>musculus GN=Spast<br>PE=2 SV=3 -<br>[SPAST_MOUSE]                                                                            | 5.21  | 1 | 2  | 2  | 4  | 0.91 | 1.04 | 1.15 | 0.94 | 1.03 | 0.90 | 0.99 | 0.91 | 1.00 | 0.87 | 0.96 | 1.06 | 1.16 | 66.41  | 9.69 |
| P80313   | T-complex protein 1<br>subunit eta OS=Mus<br>musculus GN=Ct7<br>PE=1 SV=1 -<br>[TCPH_MOUSE]                                                    | 31.62 | 1 | 14 | 14 | 40 | 0.99 | 0.87 | 0.90 | 1.11 | 1.10 | 0.92 | 0.93 | 0.91 | 0.90 | 0.96 | 0.98 | 1.00 | 1.02 | 59.61  | 7.84 |
| E9Q0M7   | Protein Atp11b<br>OS=Mus musculus<br>GN=Atp11b PE=2<br>SV=1 -<br>[E9Q0M7_MOUSE]                                                                | 2.38  | 3 | 1  | 2  | 4  | 1.16 | 1.13 | 0.97 | 1.24 | 1.06 | 0.89 | 0.76 | 0.91 | 0.78 | 1.33 | 1.15 | 1.14 | 0.98 | 95.26  | 6.24 |

|          |                                                                                                                   |       |   |    |    |      |      |      |      |      |      |      |      |      |      |      |      |      |      |        |      |
|----------|-------------------------------------------------------------------------------------------------------------------|-------|---|----|----|------|------|------|------|------|------|------|------|------|------|------|------|------|------|--------|------|
| P63321   | Ras-related protein Ral-A<br>OS=Mus musculus<br>GN=Rala PE=1 SV=1 -<br>[RALA_MOUSE]                               | 51.94 | 1 | 3  | 8  | 112  | 1.06 | 0.86 | 0.80 | 1.06 | 1.01 | 0.96 | 0.90 | 0.91 | 0.87 | 0.89 | 0.84 | 0.85 | 0.77 | 23.54  | 7.11 |
| E0CXE3   | Contactin-6 OS=Mus musculus<br>GN=Cntn6 PE=2 SV=1 -<br>[E0CXE3_MOUSE]                                             | 3.45  | 3 | 2  | 2  | 4    | 1.02 | 1.05 | 1.03 | 1.04 | 1.03 | 0.97 | 0.95 | 0.91 | 0.89 | 1.00 | 0.98 | 1.01 | 0.99 | 105.45 | 6.58 |
| Q3TDK6   | Protein rogdi homolog<br>OS=Mus musculus<br>GN=Rogdi PE=2 SV=2 -<br>[ROGDI_MOUSE]                                 | 47.74 | 3 | 10 | 10 | 33   | 0.99 | 1.05 | 1.03 | 1.03 | 1.05 | 0.86 | 0.85 | 0.91 | 0.94 | 0.94 | 0.92 | 0.99 | 0.97 | 32.08  | 8.18 |
| Q8BU88   | 39S ribosomal protein L22, mitochondrial<br>OS=Mus musculus<br>GN=Mrpl22 PE=2 SV=1 -<br>[RM22_MOUSE]              | 5.83  | 1 | 1  | 1  | 2    | 0.89 | 1.04 | 1.16 | 0.82 | 0.92 | 0.81 | 0.90 | 0.91 | 1.01 | 0.84 | 0.94 | 0.85 | 0.95 | 23.79  | 9.86 |
| Q9DC51   | Guanine nucleotide-binding protein G(k) subunit alpha<br>OS=Mus musculus<br>GN=Gnai3 PE=1 SV=3 -<br>[GNAI3_MOUSE] | 40.68 | 6 | 5  | 11 | 72   | 1.04 | 1.24 | 1.10 | 1.17 | 1.08 | 0.90 | 0.89 | 0.91 | 0.84 | 1.07 | 1.00 | 1.00 | 0.99 | 40.51  | 5.69 |
| Q9EPR2-2 | Isoform 2 of Group XIIA secretory phospholipase A2<br>OS=Mus musculus<br>GN=Pla2g12a -<br>[PG12A_MOUSE]           | 9.80  | 2 | 1  | 1  | 1    | 0.76 | 0.96 | 1.26 | 0.75 | 0.98 | 0.87 | 1.14 | 0.91 | 1.19 | 0.73 | 0.96 | 0.76 | 1.00 | 17.19  | 6.49 |
| Q9QZD9   | Eukaryotic translation initiation factor 3 subunit 1<br>OS=Mus musculus<br>GN=EIF3i PE=1 SV=1 -<br>[EIF3I_MOUSE]  | 20.92 | 2 | 7  | 7  | 18   | 0.94 | 0.86 | 0.91 | 0.98 | 1.01 | 0.94 | 0.96 | 0.91 | 0.95 | 0.87 | 0.95 | 0.93 | 0.96 | 36.44  | 5.64 |
| Q9CQF9   | Preylcysteine oxidase<br>OS=Mus musculus<br>GN=Pcyox1 PE=1 SV=1 -<br>[PCYOX_MOUSE]                                | 30.30 | 3 | 10 | 10 | 28   | 1.13 | 0.97 | 0.89 | 1.08 | 0.98 | 0.90 | 0.82 | 0.91 | 0.82 | 0.89 | 0.81 | 0.96 | 0.86 | 56.46  | 6.92 |
| Q6PIC6   | Sodium/potassium-transporting ATPase subunit alpha-3<br>OS=Mus musculus<br>GN=Atpla3 PE=1 SV=1 -<br>[AT1A3_MOUSE] | 62.69 | 5 | 44 | 70 | 2117 | 1.02 | 1.05 | 1.01 | 1.10 | 1.06 | 0.91 | 0.89 | 0.91 | 0.89 | 0.97 | 0.93 | 0.97 | 0.96 | 111.62 | 5.41 |
| Q9CQA5   | Mediator of RNA polymerase II transcription subunit 4<br>OS=Mus musculus<br>GN=Med4 PE=2 SV=1 -<br>[MED4_MOUSE]   | 8.52  | 2 | 2  | 2  | 4    | 0.83 | 0.88 | 1.06 | 0.81 | 0.97 | 0.87 | 1.03 | 0.91 | 1.09 | 0.78 | 0.94 | 0.97 | 1.16 | 29.76  | 5.05 |
| F6Y616   | Polyadenylate-binding protein-interacting protein 1<br>OS=Mus musculus<br>GN=Paip1 PE=2 SV=2 -<br>[F6Y616_MOUSE]  | 27.89 | 5 | 3  | 10 | 32   | 0.93 | 0.81 | 0.92 | 0.97 | 1.04 | 0.92 | 0.99 | 0.91 | 1.02 | 0.88 | 1.02 | 0.79 | 0.91 | 53.93  | 4.78 |

|          |                                                                                                                        |       |    |    |    |     |      |      |      |      |      |      |      |      |      |      |      |      |      |        |      |
|----------|------------------------------------------------------------------------------------------------------------------------|-------|----|----|----|-----|------|------|------|------|------|------|------|------|------|------|------|------|------|--------|------|
| Q9DCU6   | 39S ribosomal protein L4, mitochondrial<br>OS=Mus musculus<br>GN=Mrpl4 PE=2<br>SV=1 -<br>[RM04_MOUSE]                  | 3.74  | 1  | 1  | 1  | 2   | 0.90 | 0.90 | 1.00 | 1.17 | 1.29 | 1.09 | 1.21 | 0.91 | 1.01 | 0.95 | 1.05 | 0.86 | 0.95 | 33.05  | 9.82 |
| Q810B6   | Ankyrin repeat and FYVE domain-containing protein 1<br>OS=Mus musculus<br>GN=Anky1 PE=2<br>SV=2 -<br>[ANFY1_MOUSE]     | 4.53  | 2  | 4  | 4  | 5   | 0.89 | 0.93 | 1.05 | 1.00 | 1.01 | 0.91 | 1.00 | 0.91 | 0.97 | 1.01 | 1.17 | 1.01 | 1.08 | 128.57 | 5.91 |
| B1AXI2   | Rho guanine nucleotide exchange factor 9<br>OS=Mus musculus<br>GN=Arhgef9 PE=2<br>SV=1 -<br>[B1AXI2_MOUSE]             | 7.25  | 7  | 3  | 3  | 6   | 0.97 | 1.12 | 1.13 | 1.08 | 1.10 | 0.98 | 0.98 | 0.91 | 1.01 | 1.01 | 1.09 | 1.04 | 1.04 | 49.38  | 7.03 |
| Q8BYR5   | Isoform 6 of Calcium-dependent secretion activator 2<br>OS=Mus musculus<br>GN=Cadps2<br>[CAPS2_MOUSE]                  | 9.11  | 11 | 3  | 6  | 14  | 0.93 | 1.05 | 1.07 | 1.09 | 1.17 | 0.90 | 0.91 | 0.91 | 0.98 | 0.87 | 0.94 | 0.95 | 1.02 | 87.41  | 6.77 |
| D3Z2Q2   | Syntaxin-binding protein 5<br>OS=Mus musculus<br>GN=Stxbp5 PE=2<br>SV=1 -<br>[D3Z2Q2_MOUSE]                            | 22.47 | 5  | 16 | 16 | 73  | 1.06 | 1.01 | 0.90 | 1.11 | 1.04 | 0.94 | 0.89 | 0.91 | 0.90 | 0.97 | 0.94 | 1.00 | 0.94 | 121.63 | 6.96 |
| E9QNH6   | Unconventional myosin Ib<br>OS=Mus musculus<br>GN=Myo1b PE=2<br>SV=1 -<br>[E9QNH6_MOUSE]                               | 5.29  | 6  | 4  | 4  | 8   | 0.99 | 0.99 | 0.98 | 1.07 | 1.18 | 1.04 | 0.99 | 0.91 | 0.88 | 1.02 | 0.91 | 1.04 | 1.05 | 124.95 | 9.14 |
| H3BJU7   | Rho guanine nucleotide exchange factor 2<br>OS=Mus musculus<br>GN=Arhgef2 PE=2<br>SV=1 -<br>[H3BJU7_MOUSE]             | 31.17 | 17 | 22 | 22 | 52  | 0.95 | 1.05 | 1.16 | 1.05 | 1.17 | 0.93 | 1.02 | 0.91 | 0.99 | 0.95 | 1.02 | 1.00 | 1.03 | 108.52 | 6.87 |
| Q9Z1G4-3 | Isoform A1-III of V-type proton ATPase 116 kDa subunit a isoform 1<br>OS=Mus musculus<br>GN=Atp6v0a1 -<br>[VPP1_MOUSE] | 29.57 | 12 | 23 | 24 | 199 | 1.01 | 1.05 | 1.07 | 1.08 | 1.09 | 0.86 | 0.86 | 0.91 | 0.92 | 0.95 | 0.93 | 0.92 | 0.95 | 95.56  | 6.77 |
| Q07797   | Galactin-3-binding protein<br>OS=Mus musculus<br>GN=Lgals3bp PE=1<br>SV=1 -<br>[LG3BP_MOUSE]                           | 4.51  | 2  | 2  | 2  | 5   | 0.89 | 0.95 | 1.05 | 0.79 | 0.87 | 0.77 | 0.85 | 0.91 | 1.03 | 0.74 | 0.84 | 0.67 | 0.74 | 64.45  | 5.14 |
| Q9CQ22   | Regulator complex protein LAMTOR1<br>OS=Mus musculus<br>GN=Lamtor1 PE=1<br>SV=1 -<br>[LTOR1_MOUSE]                     | 29.81 | 1  | 3  | 3  | 10  | 1.05 | 1.16 | 0.97 | 0.94 | 0.81 | 1.10 | 0.94 | 0.91 | 0.86 | 0.98 | 0.82 | 0.94 | 0.84 | 17.74  | 5.15 |
| F8VFN4   | Protein Agl<br>OS=Mus musculus<br>GN=Agl PE=4<br>SV=1 -<br>[F8VFN4_MOUSE]                                              | 13.19 | 5  | 14 | 14 | 23  | 1.12 | 1.11 | 1.04 | 1.11 | 1.04 | 0.94 | 0.91 | 0.91 | 0.85 | 0.95 | 0.91 | 1.03 | 0.98 | 174.18 | 6.74 |

|        |                                                                                                                                 |       |   |    |    |    |      |      |      |      |      |      |      |      |      |      |      |      |      |       |       |
|--------|---------------------------------------------------------------------------------------------------------------------------------|-------|---|----|----|----|------|------|------|------|------|------|------|------|------|------|------|------|------|-------|-------|
| O55033 | Cytoplasmic protein NCK2 OS=Mus musculus GN=Nck2 PE=1 SV=1 - [NCK2_MOUSE]                                                       | 52.37 | 1 | 12 | 14 | 37 | 0.94 | 0.93 | 0.98 | 0.87 | 0.97 | 0.85 | 0.93 | 0.91 | 0.95 | 0.82 | 0.89 | 0.80 | 0.88 | 42.85 | 6.95  |
| Q9CQZ5 | NADH dehydrogenase [ubiquinone] 1 alpha subcomplex subunit 6 OS=Mus musculus GN=Ndufa6 PE=1 SV=1 - [NDUA6_MOUSE]                | 45.04 | 1 | 6  | 6  | 12 | 0.94 | 0.87 | 0.89 | 1.05 | 1.12 | 0.92 | 0.98 | 0.91 | 0.97 | 0.96 | 1.03 | 0.98 | 1.04 | 15.27 | 10.11 |
| Q8K273 | Membrane magnesium transporter 1 OS=Mus musculus GN=Mmgt1 PE=2 SV=1 - [MMGT1_MOUSE]                                             | 18.32 | 1 | 1  | 1  | 1  | 0.83 | 0.71 | 0.86 | 1.18 | 1.42 | 0.96 | 1.16 | 0.91 | 1.10 | 0.82 | 1.00 | 0.90 | 1.10 | 14.67 | 9.16  |
| Q61093 | Cytochrome b-245 heavy chain OS=Mus musculus GN=Cybb PE=2 SV=1 - [CY24B_MOUSE]                                                  | 2.63  | 1 | 1  | 1  | 2  | 1.45 | 1.25 | 0.86 | 1.27 | 0.88 | 1.41 | 0.96 | 0.91 | 0.63 | 1.10 | 0.76 | 1.33 | 0.92 | 65.26 | 7.72  |
| A2AE27 | AMP deaminase 2 OS=Mus musculus GN=Ampd2 PE=4 SV=1 - [A2AE27_MOUSE]                                                             | 11.41 | 5 | 9  | 9  | 14 | 1.02 | 0.99 | 1.01 | 0.95 | 0.90 | 0.99 | 0.89 | 0.91 | 0.82 | 0.99 | 0.92 | 1.06 | 0.98 | 94.64 | 6.51  |
| B1AXC8 | Coiled-coil-helix-coiled-coil-helix domain-containing protein 7 (Fragment) OS=Mus musculus GN=Chchd7 PE=2 SV=1 - [B1AXC8_MOUSE] | 64.56 | 4 | 1  | 5  | 17 | 0.77 | 0.90 | 1.15 | 0.83 | 1.07 | 0.95 | 1.22 | 0.91 | 1.17 | 0.96 | 1.25 | 0.97 | 1.25 | 9.32  | 8.19  |
| O35239 | Tyrosine-protein phosphatase non-receptor type 9 OS=Mus musculus GN=Ptpn9 PE=2 SV=2 - [PTN9_MOUSE]                              | 1.85  | 1 | 1  | 1  | 2  | 0.92 | 1.18 | 1.28 | 1.02 | 1.12 | 0.86 | 0.93 | 0.91 | 0.99 | 1.02 | 1.12 | 1.04 | 1.14 | 67.93 | 8.10  |
| Q8VCW8 | Acyl-CoA synthetase family member 2, mitochondrial OS=Mus musculus GN=Acsf2 PE=2 SV=1 - [ACSF2_MOUSE]                           | 21.79 | 1 | 11 | 11 | 24 | 0.96 | 0.90 | 0.94 | 1.00 | 1.04 | 0.93 | 0.89 | 0.91 | 0.98 | 1.00 | 1.02 | 1.01 | 1.12 | 67.91 | 8.18  |
| P35802 | Neuronal membrane glycoprotein M6-a OS=Mus musculus GN=Gpm6a PE=1 SV=1 - [GPM6A_MOUSE]                                          | 17.63 | 1 | 7  | 7  | 32 | 1.06 | 1.12 | 1.10 | 1.15 | 1.07 | 0.97 | 0.92 | 0.91 | 0.89 | 0.93 | 0.88 | 1.03 | 1.03 | 31.13 | 5.27  |
| Q8CBY8 | Isoform 2 of Dynactin subunit 4 OS=Mus musculus GN=Dctn4 - [DCTN4_MOUSE]                                                        | 42.61 | 2 | 12 | 12 | 23 | 1.09 | 1.00 | 1.00 | 1.04 | 1.03 | 0.91 | 0.84 | 0.91 | 0.86 | 0.96 | 0.92 | 1.02 | 1.00 | 52.21 | 7.69  |

|         |                                                                                                                             |       |    |    |    |    |      |      |      |      |      |      |      |      |      |      |      |      |      |        |      |
|---------|-----------------------------------------------------------------------------------------------------------------------------|-------|----|----|----|----|------|------|------|------|------|------|------|------|------|------|------|------|------|--------|------|
| Q8BPM0- | Isoform 2 of Disheveled-associated activator of morphogenesis 1<br>OS=Mus musculus<br>GN=Daam1 - [DAAM1_MOUSE]              | 7.96  | 6  | 6  | 8  | 17 | 0.90 | 1.06 | 1.17 | 1.15 | 1.26 | 0.91 | 0.97 | 0.91 | 0.95 | 1.01 | 1.06 | 0.98 | 1.14 | 122.20 | 7.46 |
| D3YUM1  | NADH dehydrogenase [ubiquinone] flavoprotein 1, mitochondrial<br>OS=Mus musculus<br>GN=Ndufv1<br>PE=2 SV=1 - [D3YUM1_MOUSE] | 52.09 | 6  | 17 | 17 | 56 | 0.97 | 1.03 | 1.06 | 1.03 | 1.07 | 0.93 | 0.97 | 0.91 | 0.91 | 0.95 | 1.00 | 1.05 | 1.06 | 49.88  | 8.07 |
| Q9ESN6  | Tripartite motif-containing protein 2<br>OS=Mus musculus<br>GN=Trim2<br>PE=1 SV=1 - [TRIM2_MOUSE]                           | 36.96 | 7  | 19 | 22 | 68 | 1.00 | 0.78 | 0.78 | 0.94 | 0.93 | 0.89 | 0.85 | 0.91 | 0.87 | 0.84 | 0.84 | 0.87 | 0.84 | 81.39  | 6.96 |
| Q6P5B5  | Fragile X mental retardation syndrome-related protein 2<br>OS=Mus musculus<br>GN=Fxr2<br>PE=2 SV=1 - [Q6P5B5_MOUSE]         | 26.71 | 2  | 8  | 12 | 29 | 0.90 | 1.10 | 1.17 | 0.91 | 1.01 | 0.95 | 1.05 | 0.91 | 0.93 | 0.94 | 1.02 | 0.84 | 0.98 | 74.21  | 6.23 |
| Q6GQ79  | Nodal modulator 1<br>OS=Mus musculus<br>GN=Nomo1<br>PE=1 SV=1 - [NOMO1_MOUSE]                                               | 17.13 | 1  | 14 | 14 | 37 | 1.03 | 1.04 | 1.03 | 1.02 | 0.98 | 0.86 | 0.85 | 0.91 | 0.87 | 0.89 | 0.87 | 0.91 | 0.87 | 133.34 | 6.09 |
| Q62074  | Protein kinase C iota type<br>OS=Mus musculus<br>GN=Prkci<br>PE=1 SV=3 - [KPCL_MOUSE]                                       | 1.68  | 1  | 1  | 1  | 1  | 0.92 | 1.18 | 1.28 | 1.13 | 1.23 | 1.03 | 1.11 | 0.91 | 0.99 | 1.06 | 1.16 | 0.99 | 1.08 | 68.16  | 5.85 |
| B1AXJ6  | Low-density lipoprotein receptor-related protein 8<br>OS=Mus musculus<br>GN=Lrp8<br>PE=2 SV=1 - [B1AXJ6_MOUSE]              | 5.19  | 7  | 2  | 2  | 5  | 0.97 | 1.07 | 1.11 | 0.91 | 0.83 | 0.93 | 0.85 | 0.91 | 0.83 | 1.00 | 0.92 | 0.88 | 0.81 | 77.24  | 5.00 |
| Q9Z1Z0  | General vesicular transport factor p115<br>OS=Mus musculus<br>GN=Uso1<br>PE=1 SV=2 - [USO1_MOUSE]                           | 29.20 | 4  | 21 | 21 | 51 | 0.95 | 0.93 | 0.97 | 1.01 | 1.06 | 0.90 | 0.92 | 0.91 | 0.96 | 0.96 | 1.01 | 0.93 | 0.97 | 106.92 | 4.93 |
| B1AX58  | Plastin-3<br>OS=Mus musculus<br>GN=Pls3<br>PE=2 SV=1 - [B1AX58_MOUSE]                                                       | 31.77 | 2  | 13 | 18 | 47 | 1.00 | 0.85 | 0.86 | 1.05 | 1.10 | 0.99 | 1.01 | 0.91 | 0.99 | 0.99 | 0.96 | 0.95 | 0.94 | 71.70  | 5.62 |
| Q8VBY2  | Calcium/calmodulin-dependent protein kinase kinase 1<br>OS=Mus musculus<br>GN=Camkk1<br>PE=1 SV=1 - [KKCC1_MOUSE]           | 24.95 | 2  | 9  | 9  | 18 | 0.96 | 0.97 | 0.90 | 1.12 | 0.99 | 0.94 | 0.85 | 0.91 | 0.94 | 0.91 | 0.88 | 1.09 | 0.93 | 55.80  | 5.99 |
| F6QYT9  | Kalirin (Fragment)<br>OS=Mus musculus<br>GN=Kalm<br>PE=4 SV=1 - [F6QYT9_MOUSE]                                              | 7.89  | 16 | 10 | 15 | 22 | 0.88 | 1.15 | 1.26 | 1.02 | 1.05 | 0.96 | 1.06 | 0.91 | 0.97 | 0.87 | 0.98 | 0.90 | 0.97 | 270.59 | 6.11 |

|        |                                                                                                          |       |    |    |    |    |      |      |      |      |      |      |      |      |      |      |      |      |      |        |       |
|--------|----------------------------------------------------------------------------------------------------------|-------|----|----|----|----|------|------|------|------|------|------|------|------|------|------|------|------|------|--------|-------|
| Q9QXW9 | Large neutral amino acids transporter small subunit 2 OS=Mus musculus GN=Slc7a8 PE=1 SV=1 - [LAT2_MOUSE] | 1.69  | 1  | 1  | 1  | 2  | 1.27 | 1.02 | 0.80 | 1.20 | 0.94 | 0.98 | 0.77 | 0.91 | 0.71 | 0.92 | 0.72 | 1.12 | 0.89 | 57.84  | 6.67  |
| Q9JME5 | AP-3 complex subunit beta-2 OS=Mus musculus GN=Ap3b2 PE=1 SV=2 - [AP3B2_MOUSE]                           | 25.88 | 2  | 20 | 22 | 54 | 0.98 | 1.05 | 1.08 | 1.10 | 1.14 | 0.87 | 0.89 | 0.91 | 0.94 | 0.95 | 0.97 | 1.02 | 1.08 | 119.12 | 5.63  |
| Q3TIR3 | Synembrym-A OS=Mus musculus GN=Ric8a PE=1 SV=2 - [RIC8A_MOUSE]                                           | 10.00 | 1  | 3  | 3  | 6  | 0.81 | 1.17 | 1.34 | 1.11 | 1.37 | 0.95 | 1.16 | 0.91 | 1.03 | 0.95 | 1.18 | 1.11 | 1.27 | 59.81  | 5.68  |
| O35841 | Apoptosis inhibitor 5 OS=Mus musculus GN=Api5 PE=2 SV=2 - [API5_MOUSE]                                   | 11.11 | 1  | 4  | 4  | 10 | 1.00 | 1.02 | 1.07 | 0.89 | 1.10 | 0.96 | 0.92 | 0.91 | 0.94 | 0.91 | 1.01 | 0.95 | 0.98 | 56.75  | 5.92  |
| Q9R1R8 | Retinol dehydrogenase 11 OS=Mus musculus GN=Rdh11 PE=2 SV=1 - [Q9R1R8_MOUSE]                             | 7.00  | 2  | 2  | 2  | 5  | 0.93 | 0.79 | 0.86 | 1.17 | 1.20 | 0.95 | 0.91 | 0.91 | 0.97 | 1.03 | 1.00 | 1.00 | 1.00 | 33.22  | 8.79  |
| Q9Z103 | Activity-dependent neuroprotector homeobox protein OS=Mus musculus GN=Adnp PE=2 SV=1 - [ADNP_MOUSE]      | 3.99  | 2  | 2  | 2  | 7  | 1.06 | 1.42 | 1.14 | 0.84 | 0.79 | 1.07 | 0.92 | 0.91 | 0.86 | 1.03 | 0.91 | 0.99 | 0.91 | 92.01  | 6.06  |
| Q8BVQ5 | Protein phosphatase methylesterase 1 OS=Mus musculus GN=Ppme1 PE=1 SV=5 - [PPME1_MOUSE]                  | 32.12 | 1  | 12 | 12 | 23 | 0.94 | 0.91 | 0.90 | 1.09 | 1.14 | 0.97 | 1.01 | 0.91 | 0.97 | 0.93 | 1.00 | 0.94 | 0.96 | 42.23  | 5.97  |
| H3BJ77 | FUN14 domain containing 1, isoform CRA_b OS=Mus musculus GN=Fundc1 PE=4 SV=1 - [H3BJ77_MOUSE]            | 15.18 | 2  | 1  | 1  | 2  | 1.10 | 0.92 | 0.83 | 1.21 | 1.09 | 0.96 | 0.86 | 0.91 | 0.82 | 0.96 | 0.87 | 1.07 | 0.97 | 12.04  | 9.66  |
| P14576 | Signal recognition particle 54 kDa protein OS=Mus musculus GN=Srp54 PE=1 SV=2 - [SRP54_MOUSE]            | 13.89 | 2  | 5  | 5  | 9  | 0.96 | 0.83 | 0.84 | 1.09 | 1.07 | 0.96 | 1.00 | 0.91 | 0.90 | 0.99 | 0.99 | 0.98 | 0.98 | 55.68  | 8.75  |
| P28867 | Protein kinase C delta type OS=Mus musculus GN=Prkcd PE=1 SV=3 - [KPCD_MOUSE]                            | 20.33 | 10 | 9  | 10 | 22 | 0.89 | 0.87 | 1.11 | 0.98 | 1.20 | 0.93 | 1.15 | 0.91 | 1.00 | 0.87 | 0.99 | 0.85 | 0.98 | 77.50  | 7.39  |
| Q8BVG8 | N-acetyltransferase 14 OS=Mus musculus GN=Nat14 PE=2 SV=1 - [NAT14_MOUSE]                                | 26.70 | 1  | 4  | 4  | 8  | 0.93 | 0.81 | 0.98 | 1.18 | 1.28 | 0.85 | 0.91 | 0.91 | 0.97 | 1.05 | 1.12 | 1.00 | 1.14 | 21.76  | 10.74 |

|         |                                                                                                             |       |   |    |    |    |      |      |      |      |      |      |      |      |      |      |      |      |      |        |      |
|---------|-------------------------------------------------------------------------------------------------------------|-------|---|----|----|----|------|------|------|------|------|------|------|------|------|------|------|------|------|--------|------|
| Q3UHL1  | CaM kinase-like vesicle-associated protein OS=Mus musculus GN=Camkv PE=1 SV=2 - [CAMKV_MOUSE]               | 60.55 | 1 | 26 | 26 | 92 | 1.03 | 1.02 | 1.01 | 1.08 | 1.00 | 0.93 | 0.89 | 0.91 | 0.87 | 0.99 | 0.94 | 1.01 | 0.96 | 54.79  | 5.54 |
| Q810A3  | Tetrapeptide repeat protein 9C OS=Mus musculus GN=Ttc9c PE=2 SV=1 - [TTC9C_MOUSE]                           | 12.28 | 2 | 2  | 2  | 5  | 1.17 | 0.88 | 0.97 | 1.05 | 0.86 | 1.06 | 1.04 | 0.91 | 1.01 | 1.02 | 1.00 | 1.07 | 1.07 | 19.99  | 9.29 |
| P0C913  | Overexpressed in colon carcinoma 1 protein homolog OS=Mus musculus PE=3 SV=1 - [OCC1_MOUSE]                 | 55.56 | 1 | 2  | 2  | 4  | 0.99 | 0.68 | 0.71 | 0.82 | 0.68 | 1.01 | 0.84 | 0.91 | 0.92 | 0.95 | 0.90 | 0.77 | 0.78 | 6.45   | 6.57 |
| O35943  | Fraixin, mitochondrial OS=Mus musculus GN=Fxn PE=1 SV=1 - [FRDA_MOUSE]                                      | 19.81 | 1 | 3  | 3  | 6  | 1.21 | 0.73 | 0.63 | 0.93 | 0.83 | 1.16 | 0.82 | 0.91 | 0.77 | 1.07 | 0.85 | 0.92 | 0.82 | 22.91  | 8.02 |
| Q55RJH3 | Cadherin-12 OS=Mus musculus GN=Cdh12 PE=2 SV=1 - [CAD12_MOUSE]                                              | 1.51  | 1 | 1  | 1  | 1  | 1.20 | 1.27 | 1.05 | 0.91 | 0.76 | 0.96 | 0.80 | 0.91 | 0.76 | 0.87 | 0.73 | 0.67 | 0.56 | 88.41  | 4.83 |
| P47802  | Metaxin-1 OS=Mus musculus GN=Mtx1 PE=1 SV=1 - [MTX1_MOUSE]                                                  | 18.30 | 8 | 5  | 5  | 9  | 1.04 | 1.32 | 1.16 | 1.19 | 1.09 | 0.81 | 0.78 | 0.91 | 0.83 | 0.96 | 0.86 | 1.02 | 0.98 | 35.60  | 6.18 |
| D3YYW1  | Transmembrane 9 superfamily member 1 (Fragment) OS=Mus musculus GN=Tm9sf1 PE=2 SV=1 - [D3YYW1_MOUSE]        | 10.17 | 6 | 1  | 1  | 2  | 1.07 | 1.15 | 1.07 | 1.07 | 1.00 | 0.91 | 0.84 | 0.91 | 0.85 | 0.95 | 0.88 | 1.04 | 0.96 | 13.50  | 7.44 |
| O54774  | AP-3 complex subunit delta-1 OS=Mus musculus GN=Ap3d1 PE=1 SV=1 - [AP3D1_MOUSE]                             | 22.77 | 1 | 17 | 17 | 45 | 0.95 | 0.96 | 1.03 | 1.10 | 1.03 | 0.92 | 0.94 | 0.91 | 0.87 | 0.91 | 0.90 | 0.99 | 0.97 | 135.00 | 7.37 |
| P35123  | Ubiquitin carboxyl-terminal hydrolase 4 OS=Mus musculus GN=Usp4 PE=1 SV=3 - [UBP4_MOUSE]                    | 8.32  | 1 | 5  | 7  | 15 | 0.90 | 1.12 | 1.12 | 1.03 | 1.12 | 0.93 | 1.03 | 0.91 | 0.91 | 0.87 | 0.89 | 0.95 | 0.99 | 108.27 | 5.64 |
| Q91W29  | Cytochrome c oxidase subunit 4 isoform 2, mitochondrial OS=Mus musculus GN=Cox4i2 PE=2 SV=1 - [COX42_MOUSE] | 6.40  | 1 | 1  | 1  | 3  | 0.87 | 0.75 | 0.86 | 0.87 | 1.00 | 0.94 | 1.07 | 0.91 | 1.04 | 0.91 | 1.04 | 0.77 | 0.88 | 20.19  | 9.47 |
| Q8CIG8  | Protein arginine N-methyltransferase 5 OS=Mus musculus GN=Prmt5 PE=1 SV=3 - [ANM5_MOUSE]                    | 18.21 | 2 | 9  | 9  | 16 | 1.07 | 1.08 | 0.94 | 1.14 | 1.07 | 0.95 | 0.90 | 0.91 | 0.85 | 0.99 | 0.90 | 1.08 | 0.92 | 72.63  | 6.42 |
| Q9R0S3  | Matrix metalloproteinase-17 OS=Mus musculus GN=Mmp17 PE=1 SV=3 - [MMP17_MOUSE]                              | 15.22 | 1 | 4  | 4  | 10 | 1.10 | 1.02 | 0.97 | 0.89 | 0.75 | 1.07 | 1.03 | 0.91 | 0.96 | 1.04 | 1.01 | 1.09 | 1.21 | 64.29  | 6.38 |



|          |                                                                                                              |       |   |    |    |    |      |      |      |      |      |      |      |      |      |      |      |      |      |        |      |
|----------|--------------------------------------------------------------------------------------------------------------|-------|---|----|----|----|------|------|------|------|------|------|------|------|------|------|------|------|------|--------|------|
| Q60929-2 | Isoform 2 of Myocyte-specific enhancer factor 2A OS=Mus musculus GN=Mef2a - [MEF2A_MOUSE]                    | 11.22 | 4 | 2  | 3  | 6  | 1.00 | 1.14 | 1.14 | 1.04 | 1.03 | 0.95 | 1.05 | 0.91 | 0.91 | 1.00 | 0.99 | 0.89 | 0.89 | 52.59  | 8.69 |
| Q8BUY8   | G-protein coupled receptor-associated sorting protein 2 OS=Mus musculus GN=Gprasp2 PE=2 SV=2 - [GASP2_MOUSE] | 6.30  | 1 | 4  | 4  | 14 | 1.20 | 1.25 | 1.22 | 0.96 | 0.90 | 0.92 | 0.82 | 0.91 | 0.82 | 0.96 | 0.80 | 1.09 | 0.92 | 92.74  | 5.11 |
| B1AQZ0   | Septin-8 OS=Mus musculus GN=Sept8 PE=2 SV=1 - [B1AQZ0_MOUSE]                                                 | 44.63 | 5 | 2  | 19 | 95 | 0.93 | 0.86 | 0.91 | 1.04 | 1.11 | 0.95 | 0.98 | 0.91 | 1.13 | 0.98 | 1.09 | 0.97 | 1.05 | 55.84  | 6.10 |
| P54830   | Tyrosine-protein phosphatase non-receptor type 5 OS=Mus musculus GN=Ptpn5 PE=2 SV=2 - [PTN5_MOUSE]           | 17.19 | 4 | 6  | 6  | 10 | 1.03 | 1.13 | 1.04 | 1.25 | 1.09 | 1.01 | 0.97 | 0.91 | 0.94 | 1.13 | 1.04 | 1.23 | 1.15 | 60.78  | 5.20 |
| Q61578   | NADPH:adrenodoxin oxidoreductase, mitochondrial OS=Mus musculus GN=Fdxr PE=2 SV=1 - [ADRO_MOUSE]             | 12.35 | 1 | 4  | 4  | 4  | 0.88 | 1.32 | 1.35 | 1.09 | 1.25 | 0.98 | 1.12 | 0.91 | 1.08 | 1.07 | 1.14 | 1.01 | 1.15 | 54.17  | 8.66 |
| Q99LGI   | Transmembrane protein 51 OS=Mus musculus GN=Tmem51 PE=1 SV=1 - [TMM51_MOUSE]                                 | 19.68 | 1 | 2  | 2  | 3  | 1.08 | 1.00 | 0.93 | 0.80 | 0.75 | 0.99 | 0.92 | 0.91 | 0.85 | 1.32 | 1.23 | 1.27 | 1.18 | 27.38  | 6.95 |
| Q68EF8   | Rap guanine nucleotide exchange factor-like 1 OS=Mus musculus GN=Rapgef1 PE=2 SV=2 - [RPGFL_MOUSE]           | 9.67  | 1 | 3  | 3  | 8  | 0.82 | 0.81 | 1.07 | 0.95 | 1.14 | 0.83 | 0.94 | 0.91 | 1.09 | 0.92 | 1.13 | 0.91 | 0.97 | 73.65  | 6.21 |
| P31750   | RAC-alpha serine/threonine-protein kinase OS=Mus musculus GN=Akt1 PE=1 SV=2 - [AKT1_MOUSE]                   | 11.46 | 4 | 3  | 5  | 14 | 1.02 | 1.00 | 0.98 | 1.04 | 1.00 | 1.02 | 0.97 | 0.91 | 0.90 | 0.92 | 0.93 | 0.94 | 0.92 | 55.67  | 5.90 |
| E9QAN4   | Kinesin-like protein KIF1A OS=Mus musculus GN=Kif1a PE=2 SV=1 - [E9QAN4_MOUSE]                               | 21.20 | 7 | 19 | 27 | 51 | 0.98 | 0.87 | 0.99 | 1.03 | 1.05 | 0.90 | 0.94 | 0.91 | 0.88 | 0.96 | 1.03 | 0.95 | 1.00 | 190.86 | 6.19 |
| Q9Z0J4-2 | Isoform N-NOS-2 of Nitric oxide synthase, brain OS=Mus musculus GN=Nos1 - [NOS1_MOUSE]                       | 15.79 | 6 | 14 | 14 | 24 | 1.20 | 1.18 | 1.05 | 1.08 | 0.93 | 0.94 | 0.86 | 0.91 | 0.76 | 1.03 | 0.87 | 1.23 | 1.08 | 148.34 | 7.43 |
| Q8R2R9   | AP-3 complex subunit mu-2 OS=Mus musculus GN=Ap3m2 PE=2 SV=1 - [AP3M2_MOUSE]                                 | 24.40 | 1 | 7  | 8  | 17 | 0.94 | 0.99 | 1.06 | 1.16 | 1.24 | 0.90 | 0.85 | 0.91 | 0.98 | 0.84 | 1.01 | 0.99 | 1.02 | 46.89  | 7.56 |
| Q9D8Y1   | Transmembrane protein 126A OS=Mus musculus GN=Tmem126a PE=2 SV=1 - [T126A_MOUSE]                             | 23.98 | 1 | 2  | 3  | 4  | 0.90 | 0.86 | 0.96 | 0.97 | 1.08 | 0.93 | 1.03 | 0.91 | 1.01 | 1.01 | 1.12 | 0.88 | 0.98 | 21.53  | 9.41 |

|          |                                                                                               |       |    |    |    |     |      |      |      |      |      |      |      |      |      |      |      |      |      |        |      |
|----------|-----------------------------------------------------------------------------------------------|-------|----|----|----|-----|------|------|------|------|------|------|------|------|------|------|------|------|------|--------|------|
| Q80X98   | DEAH (Asp-Glu-Ala-His) box polypeptide 38 OS=Mus musculus GN=Dhx38 PE=2 SV=1 - [Q80X98_MOUSE] | 3.50  | 1  | 3  | 3  | 5   | 1.21 | 1.08 | 1.26 | 0.80 | 1.03 | 1.16 | 1.40 | 0.91 | 1.04 | 1.62 | 2.35 | 1.43 | 0.98 | 140.54 | 6.49 |
| Q5U5V2-  | Isoform 2 of Hydroxyllysine kinase OS=Mus musculus GN=Agphd1 - [AGPD1_MOUSE]                  | 7.98  | 2  | 1  | 1  | 2   | 1.10 | 1.05 | 0.95 | 1.12 | 1.02 | 0.92 | 0.83 | 0.91 | 0.83 | 0.90 | 0.82 | 1.41 | 1.28 | 17.81  | 6.32 |
| Q80UM5   | NEL-like 2 (Chicken) OS=Mus musculus GN=Nell2 PE=2 SV=1 - [Q80UM5_MOUSE]                      | 17.09 | 2  | 12 | 12 | 34  | 1.00 | 1.01 | 1.04 | 0.95 | 0.99 | 0.85 | 0.85 | 0.92 | 0.93 | 0.83 | 0.83 | 0.85 | 0.84 | 91.37  | 5.82 |
| Q02053   | Ubiquitin-like modifier-activating enzyme 1 OS=Mus musculus GN=Uba1 PE=1 SV=1 - [UBA1_MOUSE]  | 47.16 | 2  | 33 | 33 | 170 | 0.97 | 1.04 | 1.09 | 1.04 | 1.10 | 0.94 | 0.98 | 0.92 | 0.95 | 0.95 | 0.99 | 1.01 | 1.06 | 117.73 | 5.66 |
| Q9R1T4-2 | Isoform 1 of Septin-6 OS=Mus musculus GN=Sept6 - [SEPT6_MOUSE]                                | 56.91 | 4  | 11 | 21 | 126 | 0.95 | 0.75 | 0.84 | 0.92 | 0.96 | 0.89 | 0.90 | 0.92 | 0.92 | 0.86 | 0.90 | 0.87 | 0.90 | 48.73  | 6.55 |
| Q8R104   | NAD-dependent protein deacetylase sirtuin-3 OS=Mus musculus GN=Sirt3 PE=2 SV=1 - [SIR3_MOUSE] | 11.28 | 3  | 2  | 2  | 4   | 0.94 | 0.97 | 1.03 | 1.03 | 1.10 | 0.84 | 0.89 | 0.92 | 0.97 | 0.92 | 0.98 | 0.86 | 0.92 | 28.80  | 6.23 |
| Q9EPL8   | Importin-7 OS=Mus musculus GN=Ipo7 PE=1 SV=2 - [IPO7_MOUSE]                                   | 6.17  | 1  | 5  | 5  | 16  | 0.91 | 1.04 | 1.11 | 1.16 | 1.26 | 0.83 | 0.94 | 0.92 | 1.02 | 0.94 | 1.00 | 1.00 | 1.08 | 119.41 | 4.82 |
| E9Q242   | Adenylosuccinate lyase OS=Mus musculus GN=Adsl PE=2 SV=1 - [E9Q242_MOUSE]                     | 17.27 | 4  | 6  | 6  | 19  | 0.97 | 1.19 | 1.08 | 1.15 | 1.21 | 0.97 | 0.92 | 0.92 | 0.85 | 1.04 | 1.05 | 1.15 | 1.17 | 53.10  | 7.27 |
| P47754   | F-actin-capping protein subunit alpha-2 OS=Mus musculus GN=Capza2 PE=1 SV=3 - [CAZA2_MOUSE]   | 63.29 | 2  | 11 | 13 | 87  | 1.04 | 0.95 | 0.93 | 0.99 | 0.97 | 0.92 | 0.89 | 0.92 | 0.92 | 0.89 | 0.89 | 0.97 | 0.96 | 32.95  | 5.85 |
| Q8BGR6   | ADP-ribosylation factor-like protein 15 OS=Mus musculus GN=Arl15 PE=2 SV=1 - [ARL15_MOUSE]    | 24.51 | 1  | 4  | 4  | 6   | 0.89 | 0.80 | 0.84 | 0.95 | 1.06 | 1.05 | 1.01 | 0.92 | 1.04 | 0.82 | 0.99 | 0.86 | 0.93 | 22.89  | 5.29 |
| Q80TM9-  | Isoform 3 of Nischarin OS=Mus musculus GN=Nisch - [NISCH_MOUSE]                               | 3.71  | 10 | 4  | 4  | 8   | 1.17 | 0.95 | 0.89 | 1.14 | 1.04 | 0.99 | 0.86 | 0.92 | 0.83 | 1.04 | 0.92 | 1.10 | 1.00 | 147.52 | 4.98 |
| Q62108-3 | Isoform 3 of Disks large homolog 4 OS=Mus musculus GN=Dlg4 - [DLG4_MOUSE]                     | 46.05 | 9  | 22 | 27 | 96  | 0.98 | 1.00 | 1.05 | 1.16 | 1.18 | 0.89 | 0.89 | 0.92 | 0.94 | 0.90 | 0.92 | 0.92 | 0.98 | 80.05  | 5.92 |
| Q9JI5-2  | Isoform 2 of DAZ-associated protein 1 OS=Mus musculus GN=Dazap1 - [DAZP1_MOUSE]               | 27.90 | 4  | 7  | 7  | 39  | 0.95 | 0.79 | 0.88 | 0.88 | 1.01 | 0.84 | 0.89 | 0.92 | 0.97 | 0.76 | 0.75 | 0.82 | 0.87 | 43.06  | 8.56 |

|        |                                                                                                                            |       |   |    |    |     |      |      |      |      |      |      |      |      |      |      |      |      |      |        |      |
|--------|----------------------------------------------------------------------------------------------------------------------------|-------|---|----|----|-----|------|------|------|------|------|------|------|------|------|------|------|------|------|--------|------|
| Q64299 | Protein NOV homolog<br>OS=Mus musculus<br>GN=Nov PE=2 SV=1 -<br>[NOV_MOUSE]                                                | 22.32 | 1 | 7  | 7  | 12  | 1.15 | 1.03 | 0.89 | 1.05 | 0.87 | 1.21 | 1.03 | 0.92 | 0.91 | 0.99 | 0.92 | 0.98 | 0.87 | 38.90  | 7.64 |
| Q3UXL4 | Centrosomal protein<br>kizuna OS=Mus<br>musculus GN=Plk1s1<br>PE=1 SV=1 -<br>[KIZ_MOUSE]                                   | 4.03  | 1 | 2  | 2  | 3   | 1.04 | 0.77 | 0.73 | 0.99 | 0.94 | 1.07 | 1.02 | 0.92 | 0.87 | 0.98 | 0.93 | 0.94 | 0.91 | 76.49  | 5.62 |
| P12660 | Purkinje cell protein 2<br>OS=Mus musculus<br>GN=Pcp2 PE=2 SV=2 -<br>[PCP2_MOUSE]                                          | 30.83 | 2 | 2  | 2  | 3   | 1.23 | 0.97 | 0.79 | 1.26 | 1.02 | 1.26 | 1.02 | 0.92 | 0.74 | 1.50 | 1.22 | 1.62 | 1.32 | 13.05  | 5.14 |
| Q8VDM4 | 26S proteasome non-<br>ATPase regulatory<br>subunit 2 OS=Mus<br>musculus GN=Psm2<br>PE=1 SV=1 -<br>[PSMD2_MOUSE]           | 37.67 | 2 | 26 | 26 | 56  | 0.99 | 0.99 | 0.99 | 1.05 | 1.07 | 0.95 | 0.90 | 0.92 | 0.94 | 1.00 | 0.99 | 0.98 | 0.97 | 100.14 | 5.17 |
| Q60597 | 2-oxoglutarate<br>dehydrogenase,<br>mitochondrial OS=Mus<br>musculus GN=Ogdh<br>PE=1 SV=3 -<br>[ODO1_MOUSE]                | 45.94 | 5 | 29 | 35 | 123 | 0.98 | 0.96 | 0.90 | 1.11 | 1.07 | 0.94 | 0.92 | 0.92 | 0.96 | 0.95 | 0.94 | 1.03 | 1.02 | 116.37 | 6.83 |
| Q7TSE6 | Serine/threonine-<br>protein kinase 38-like<br>OS=Mus musculus<br>GN=Stk38l PE=1<br>SV=2 -<br>[ST38L_MOUSE]                | 7.54  | 2 | 3  | 3  | 7   | 0.82 | 1.00 | 1.21 | 1.15 | 1.37 | 0.83 | 1.00 | 0.92 | 1.11 | 0.94 | 1.15 | 0.95 | 1.16 | 53.74  | 6.96 |
| Q9WVS4 | Isoform 2 of<br>MAPK/MAK/MRK<br>overlapping kinase<br>OS=Mus musculus<br>GN=Mok -<br>[MOK_MOUSE]                           | 3.93  | 3 | 1  | 1  | 1   | 0.83 | 1.36 | 1.63 | 1.00 | 1.20 | 0.96 | 1.15 | 0.92 | 1.10 | 1.06 | 1.27 | 1.15 | 1.38 | 20.85  | 9.28 |
| O55029 | Coatomer subunit beta'<br>OS=Mus musculus<br>GN=Copb2 PE=2<br>SV=2 -<br>[COPB2_MOUSE]                                      | 22.65 | 1 | 12 | 12 | 34  | 1.03 | 1.02 | 0.93 | 1.00 | 0.99 | 0.88 | 0.88 | 0.92 | 0.94 | 0.97 | 0.95 | 0.95 | 0.94 | 102.38 | 5.30 |
| Q8R0F5 | RNA-binding motif<br>protein, X-linked 2<br>OS=Mus musculus<br>GN=Rbm2 PE=1<br>SV=1 -<br>[RBMX2_MOUSE]                     | 3.99  | 1 | 1  | 1  | 2   | 1.01 | 0.85 | 0.84 | 0.81 | 0.80 | 0.92 | 0.91 | 0.92 | 0.90 | 0.74 | 0.73 | 0.75 | 0.74 | 37.51  | 9.72 |
| E9QN99 | Alpha/beta hydrolase<br>domain-containing<br>protein 14B OS=Mus<br>musculus<br>GN=Abhd14b PE=4<br>SV=1 -<br>[E9QN99_MOUSE] | 21.43 | 2 | 4  | 4  | 9   | 1.06 | 1.19 | 1.11 | 0.93 | 0.91 | 0.78 | 0.75 | 0.92 | 0.84 | 0.88 | 0.85 | 0.94 | 0.87 | 22.44  | 6.52 |
| A2AQE4 | COP9 signalosome<br>complex subunit 2<br>OS=Mus musculus<br>GN=Cops2 PE=2<br>SV=1 -<br>[A2AQE4_MOUSE]                      | 38.81 | 3 | 11 | 11 | 26  | 1.02 | 0.88 | 0.95 | 1.09 | 1.07 | 0.90 | 0.91 | 0.92 | 0.93 | 0.92 | 0.93 | 1.02 | 0.99 | 46.88  | 5.16 |

|        |                                                                                                                 |       |   |    |    |     |      |      |      |      |      |      |      |      |      |      |      |      |      |        |       |
|--------|-----------------------------------------------------------------------------------------------------------------|-------|---|----|----|-----|------|------|------|------|------|------|------|------|------|------|------|------|------|--------|-------|
| H9KUX8 | Baculoviral IAP repeat-containing protein 6<br>OS=Mus musculus<br>GN=Birc6 PE=2 SV=1<br>-[H9KUX8_MOUSE]         | 0.99  | 4 | 3  | 3  | 3   | 0.82 | 1.09 | 1.33 | 1.10 | 1.11 | 0.85 | 1.06 | 0.92 | 1.14 | 0.94 | 1.21 | 1.04 | 1.26 | 529.08 | 6.06  |
| P49935 | Pro-cathepsin H<br>OS=Mus musculus<br>GN=Ctsh PE=2 SV=2<br>-[CATH_MOUSE]                                        | 8.41  | 1 | 2  | 2  | 5   | 1.25 | 0.83 | 0.66 | 1.04 | 0.83 | 1.00 | 0.85 | 0.92 | 0.76 | 1.01 | 0.86 | 0.80 | 0.67 | 37.15  | 8.40  |
| Q5F2E8 | Serine/threonine-protein kinase TAO1<br>OS=Mus musculus<br>GN=Taok1 PE=1<br>SV=1<br>-[TAOK1_MOUSE]              | 14.99 | 2 | 11 | 14 | 27  | 0.95 | 1.08 | 1.11 | 0.91 | 0.98 | 0.88 | 0.95 | 0.92 | 1.03 | 0.93 | 0.95 | 0.99 | 1.07 | 115.98 | 7.55  |
| Q8K0U4 | Heat shock 70 kDa protein 12A<br>OS=Mus musculus<br>GN=Hspa12a PE=1<br>SV=1<br>-[HS12A_MOUSE]                   | 52.59 | 1 | 29 | 33 | 131 | 1.04 | 0.98 | 0.96 | 1.05 | 1.01 | 0.91 | 0.90 | 0.92 | 0.89 | 0.91 | 0.91 | 0.94 | 0.93 | 74.82  | 6.77  |
| G3UZ17 | Rho GTPase activating protein 6, isoform CRA_b<br>OS=Mus musculus<br>GN=Arhgap6 PE=4<br>SV=1<br>-[G3UZ17_MOUSE] | 6.07  | 7 | 2  | 2  | 4   | 1.30 | 0.90 | 0.69 | 0.92 | 0.71 | 1.08 | 0.83 | 0.92 | 0.70 | 1.42 | 1.10 | 1.55 | 1.20 | 53.56  | 6.74  |
| Q9CWF6 | Bardet-Biedl syndrome 2 protein homolog<br>OS=Mus musculus<br>GN=Bbs2 PE=2 SV=1<br>-[BBS2_MOUSE]                | 1.80  | 1 | 1  | 1  | 2   | 0.89 | 1.08 | 1.21 | 0.90 | 1.02 | 0.98 | 1.10 | 0.92 | 1.03 | 0.99 | 1.12 | 1.00 | 1.12 | 79.88  | 5.86  |
| Q9Z1F9 | SUMO-activating enzyme subunit 2<br>OS=Mus musculus<br>GN=Uba2 PE=2 SV=1<br>-[SAE2_MOUSE]                       | 28.84 | 4 | 13 | 13 | 32  | 1.00 | 1.13 | 1.09 | 1.01 | 1.03 | 0.99 | 0.92 | 0.92 | 0.93 | 0.98 | 1.03 | 0.97 | 1.00 | 70.52  | 5.24  |
| P26040 | Ezrin<br>OS=Mus musculus<br>GN=Ezr PE=1 SV=3<br>-[EZRI_MOUSE]                                                   | 42.32 | 1 | 15 | 26 | 80  | 0.95 | 0.78 | 0.81 | 0.92 | 0.98 | 0.91 | 1.01 | 0.92 | 1.01 | 0.87 | 0.94 | 0.82 | 0.85 | 69.36  | 6.10  |
| P23242 | Gap junction alpha-1 protein<br>OS=Mus musculus<br>GN=Gja1 PE=1 SV=2<br>-[CXA1_MOUSE]                           | 30.10 | 1 | 8  | 8  | 43  | 1.03 | 0.97 | 1.01 | 1.05 | 1.03 | 0.91 | 0.96 | 0.92 | 0.86 | 0.97 | 1.06 | 1.04 | 1.11 | 42.98  | 8.76  |
| P10126 | Elongation factor 1-alpha 1<br>OS=Mus musculus<br>GN=Eef1a1 PE=1 SV=3<br>-[EF1A1_MOUSE]                         | 67.97 | 3 | 10 | 20 | 183 | 1.04 | 0.91 | 0.95 | 1.03 | 0.98 | 0.87 | 0.90 | 0.92 | 0.89 | 0.94 | 0.92 | 0.94 | 0.99 | 50.08  | 9.01  |
| O08581 | Potassium channel subfamily K member 1<br>OS=Mus musculus<br>GN=Kcnk1 PE=1<br>SV=2<br>-[KCNK1_MOUSE]            | 5.65  | 1 | 1  | 1  | 1   | 0.97 | 1.66 | 1.70 | 0.81 | 0.83 | 0.94 | 0.96 | 0.92 | 0.94 | 0.72 | 0.74 | 0.86 | 0.88 | 38.18  | 6.07  |
| Q8K010 | 5-oxoprolinase<br>OS=Mus musculus<br>GN=Oplah PE=2<br>SV=1<br>-[OPLA_MOUSE]                                     | 10.87 | 3 | 10 | 10 | 18  | 1.02 | 1.12 | 1.05 | 1.06 | 1.04 | 1.00 | 0.97 | 0.92 | 0.91 | 1.03 | 1.00 | 1.11 | 1.03 | 137.52 | 6.28  |
| P14115 | 60S ribosomal protein L27a<br>OS=Mus musculus<br>GN=Rpl27a PE=2 SV=5<br>-[RL27A_MOUSE]                          | 8.11  | 1 | 1  | 1  | 4   | 1.06 | 1.06 | 1.00 | 1.13 | 1.06 | 0.95 | 0.90 | 0.92 | 0.86 | 1.19 | 1.12 | 1.24 | 1.17 | 16.60  | 11.12 |

|        |                                                                                                            |       |   |   |   |     |      |      |      |      |      |      |      |      |      |      |      |      |      |        |      |
|--------|------------------------------------------------------------------------------------------------------------|-------|---|---|---|-----|------|------|------|------|------|------|------|------|------|------|------|------|------|--------|------|
| B1AWE0 | Clathrin light chain A OS=Mus musculus GN=Ctla PE=2 SV=1 - [B1AWE0_MOUSE]                                  | 33.33 | 4 | 1 | 9 | 138 | 1.23 | 1.09 | 0.87 | 1.04 | 0.85 | 1.04 | 0.98 | 0.92 | 1.01 | 1.08 | 0.91 | 0.90 | 0.84 | 23.46  | 4.50 |
| O35678 | Monoglyceride lipase OS=Mus musculus GN=Mgll PE=1 SV=1 - [MGLL_MOUSE]                                      | 35.97 | 5 | 9 | 9 | 38  | 0.93 | 0.96 | 1.06 | 1.02 | 1.12 | 0.98 | 1.00 | 0.92 | 1.00 | 0.90 | 1.01 | 0.94 | 1.04 | 33.37  | 7.15 |
| Q792P9 | Alpha-4 integrin OS=Mus musculus GN=Itga4 PE=2 SV=1 - [Q792P9_MOUSE]                                       | 2.81  | 2 | 1 | 1 | 1   | 0.76 | 0.64 | 0.84 | 0.73 | 0.96 | 0.82 | 1.07 | 0.92 | 1.20 | 0.74 | 0.97 | 0.73 | 0.97 | 115.01 | 6.81 |
| Q99NB1 | Acetyl-coenzyme A synthetase 2-like, mitochondrial OS=Mus musculus GN=Acsc1 PE=1 SV=1 - [ACSL2_MOUSE]      | 12.17 | 1 | 7 | 7 | 14  | 1.20 | 1.20 | 1.06 | 1.07 | 0.96 | 0.97 | 0.84 | 0.92 | 0.81 | 1.06 | 0.96 | 1.13 | 0.97 | 74.58  | 6.98 |
| Q9CWX9 | Probable ATP-dependent RNA helicase DDX47 OS=Mus musculus GN=Ddx47 PE=2 SV=2 - [DDX47_MOUSE]               | 3.52  | 1 | 1 | 1 | 3   | 0.93 | 0.88 | 0.95 | 0.98 | 1.06 | 0.76 | 0.81 | 0.92 | 0.99 | 0.89 | 0.96 | 0.87 | 0.94 | 50.61  | 9.10 |
| Q80U15 | Phosphatidylinositol 3-kinase regulatory subunit alpha OS=Mus musculus GN=Pk3r1 PE=2 SV=1 - [Q80U15_MOUSE] | 8.37  | 2 | 4 | 4 | 7   | 0.86 | 1.06 | 1.14 | 0.93 | 1.11 | 0.87 | 0.97 | 0.92 | 1.00 | 0.80 | 0.94 | 0.85 | 1.00 | 53.37  | 6.44 |
| Q6NSR8 | Probable aminopeptidase NPEPL1 OS=Mus musculus GN=Npepl1 PE=2 SV=1 - [PEPL1_MOUSE]                         | 26.91 | 2 | 8 | 9 | 15  | 1.06 | 0.81 | 0.84 | 0.85 | 0.88 | 0.94 | 0.87 | 0.92 | 0.85 | 0.94 | 0.88 | 0.75 | 0.73 | 55.90  | 6.84 |
| Q9R1C6 | Diacylglycerol kinase epsilon OS=Mus musculus GN=Dgke PE=2 SV=1 - [DGKE_MOUSE]                             | 14.54 | 2 | 7 | 7 | 19  | 0.99 | 1.11 | 1.10 | 0.93 | 0.95 | 0.87 | 0.85 | 0.92 | 0.90 | 0.91 | 0.93 | 0.96 | 1.04 | 63.59  | 7.44 |
| F8VQC9 | NBCn1-G OS=Mus musculus GN=Slc4a7 PE=2 SV=1 - [F8VQC9_MOUSE]                                               | 6.28  | 3 | 2 | 6 | 16  | 1.04 | 1.22 | 1.17 | 1.08 | 1.04 | 0.88 | 0.84 | 0.92 | 0.88 | 1.13 | 1.09 | 1.02 | 0.98 | 127.14 | 6.44 |
| Q8BH7  | Gamma-aminobutyric acid receptor subunit alpha-5 OS=Mus musculus GN=Gabra5 PE=2 SV=1 - [GBRA5_MOUSE]       | 10.80 | 1 | 2 | 4 | 10  | 1.00 | 0.97 | 0.96 | 1.12 | 1.12 | 1.16 | 1.15 | 0.92 | 0.91 | 0.92 | 0.92 | 0.92 | 0.92 | 52.24  | 9.01 |
| O88792 | Junctional adhesion molecule A OS=Mus musculus GN=F11r PE=1 SV=2 - [JAM1_MOUSE]                            | 8.67  | 1 | 2 | 2 | 4   | 1.09 | 1.00 | 0.92 | 1.11 | 1.03 | 0.82 | 0.75 | 0.92 | 0.84 | 0.90 | 0.83 | 0.93 | 0.86 | 32.40  | 6.77 |
| Q8BMD2 | Isoform 3 of Zinc finger protein DZIP1 OS=Mus musculus GN=Dzip1 - [DZIP1_MOUSE]                            | 2.24  | 4 | 1 | 2 | 4   | 0.73 | 0.56 | 0.77 | 0.55 | 0.76 | 0.97 | 1.33 | 0.92 | 1.26 | 1.02 | 1.41 | 0.55 | 0.76 | 71.02  | 5.76 |

|          |                                                                                                                          |       |    |    |    |     |      |      |      |      |      |      |      |      |      |      |      |      |      |        |       |
|----------|--------------------------------------------------------------------------------------------------------------------------|-------|----|----|----|-----|------|------|------|------|------|------|------|------|------|------|------|------|------|--------|-------|
| Q9QZ06   | Toll-interacting protein<br>OS=Mus musculus<br>GN=Tollip PE=1<br>SV=1 -<br>[TOLLIP_MOUSE]                                | 35.77 | 4  | 8  | 8  | 29  | 0.93 | 0.93 | 1.05 | 0.95 | 1.00 | 0.93 | 0.98 | 0.92 | 1.01 | 0.92 | 0.97 | 0.96 | 0.95 | 30.32  | 5.17  |
| Q4VA93   | Protein kinase C<br>OS=Mus musculus<br>GN=Prkca PE=2 SV=1<br>- [Q4VA93_MOUSE]                                            | 39.58 | 7  | 14 | 22 | 68  | 1.00 | 0.96 | 0.99 | 1.04 | 1.11 | 0.96 | 0.95 | 0.92 | 1.00 | 0.95 | 1.00 | 0.87 | 0.91 | 76.77  | 7.05  |
| A2ANL9   | Teneurin-1 OS=Mus<br>musculus GN=Tenm1<br>PE=2 SV=1 -<br>[A2ANL9_MOUSE]                                                  | 3.78  | 3  | 5  | 7  | 15  | 1.05 | 1.12 | 1.04 | 1.13 | 1.13 | 0.98 | 0.90 | 0.92 | 0.87 | 1.05 | 1.02 | 0.99 | 0.92 | 304.66 | 6.32  |
| P14131   | 40S ribosomal protein<br>S16 OS=Mus<br>musculus GN=Rps16<br>PE=2 SV=4 -<br>[RS16_MOUSE]                                  | 37.67 | 1  | 6  | 6  | 14  | 0.92 | 0.95 | 1.05 | 1.00 | 1.08 | 1.00 | 0.99 | 0.92 | 0.95 | 0.93 | 1.03 | 0.93 | 1.02 | 16.44  | 10.21 |
| Q925J9-4 | Isoform 4 of Mediator<br>of RNA polymerase II<br>transcription subunit 1<br>OS=Mus musculus<br>GN=Med1 -<br>[MED1_MOUSE] | 2.18  | 5  | 2  | 2  | 3   | 0.95 | 0.88 | 0.93 | 0.94 | 0.99 | 1.00 | 1.05 | 0.92 | 0.97 | 0.92 | 0.97 | 0.85 | 0.89 | 165.35 | 8.78  |
| Q9JKY7   | Cytochrome P450<br>CYP2D22 OS=Mus<br>musculus<br>GN=Cyp2d22 PE=2<br>SV=1 -<br>[Q9JKY7_MOUSE]                             | 5.00  | 4  | 2  | 2  | 2   | 0.89 | 1.29 | 1.44 | 0.95 | 1.06 | 1.02 | 1.13 | 0.92 | 1.02 | 1.06 | 1.19 | 1.02 | 1.14 | 56.43  | 6.98  |
| P11438   | Lysosome-associated<br>membrane glycoprotein<br>1 OS=Mus musculus<br>GN=Lamp1 PE=1<br>SV=2 -<br>[LAMP1_MOUSE]            | 12.07 | 1  | 4  | 4  | 15  | 1.17 | 1.07 | 0.91 | 1.04 | 0.93 | 1.02 | 0.89 | 0.92 | 0.79 | 0.96 | 0.83 | 0.95 | 0.85 | 43.84  | 8.40  |
| Q3TKD0   | Transportin-1<br>(Fragment) OS=Mus<br>musculus GN=Trnp1<br>PE=2 SV=1 -<br>[Q3TKD0_MOUSE]                                 | 3.84  | 3  | 1  | 2  | 19  | 1.03 | 1.25 | 1.22 | 1.01 | 1.07 | 0.92 | 0.91 | 0.92 | 0.91 | 1.13 | 1.09 | 0.96 | 0.98 | 91.68  | 4.92  |
| Q8CAQ8-  | Isoform 2 of<br>Mitochondrial inner<br>membrane protein<br>OS=Mus musculus<br>GN=lmmt -<br>[IMMT_MOUSE]                  | 57.77 | 4  | 3  | 37 | 130 | 0.99 | 0.93 | 0.96 | 1.06 | 1.07 | 0.87 | 0.90 | 0.92 | 0.96 | 0.88 | 0.91 | 0.80 | 0.79 | 82.88  | 6.61  |
| Q69ZA1-2 | Isoform 2 of Cyclin-<br>dependent kinase 13<br>OS=Mus musculus<br>GN=Cdk13 -<br>[CDK13_MOUSE]                            | 2.27  | 50 | 1  | 2  | 5   | 1.34 | 1.91 | 1.41 | 1.01 | 0.75 | 1.12 | 0.83 | 0.92 | 0.68 | 1.64 | 1.22 | 1.11 | 0.83 | 158.04 | 9.70  |
| P28740-2 | Isoform 2 of Kinesin-<br>like protein KIF2A<br>OS=Mus musculus<br>GN=KiF2a -<br>[KIF2A_MOUSE]                            | 29.89 | 3  | 1  | 18 | 38  | 0.87 | 1.37 | 1.57 | 1.23 | 1.41 | 1.16 | 1.32 | 0.92 | 1.05 | 1.36 | 1.56 | 1.44 | 1.65 | 74.80  | 6.46  |
| Q9QUG9   | RAS guanyl-releasing<br>protein 2 OS=Mus<br>musculus GN=Rasgrp2<br>PE=1 SV=2 -<br>[GRP2_MOUSE]                           | 4.61  | 2  | 2  | 2  | 3   | 0.89 | 0.72 | 0.81 | 1.38 | 1.54 | 0.99 | 1.10 | 0.92 | 1.03 | 1.06 | 1.19 | 1.36 | 1.53 | 69.40  | 7.66  |

|          |                                                                                                                                             |       |    |    |    |    |      |      |      |      |      |      |      |      |      |      |      |      |      |        |      |
|----------|---------------------------------------------------------------------------------------------------------------------------------------------|-------|----|----|----|----|------|------|------|------|------|------|------|------|------|------|------|------|------|--------|------|
| Q9DB27   | Malignant T-cell-amplified sequence 1<br>OS=Mus musculus<br>GN=Mct51 PE=2<br>SV=1 -<br>[MCTS1_MOUSE]                                        | 46.96 | 3  | 6  | 6  | 15 | 1.00 | 0.81 | 0.81 | 1.04 | 1.02 | 0.98 | 0.93 | 0.92 | 0.89 | 0.92 | 0.85 | 1.00 | 0.98 | 20.54  | 8.82 |
| E9PZ88   | Alpha-mannosidase<br>2C1 OS=Mus<br>musculus GN=Man2c1<br>PE=2 SV=1 -<br>[E9PZ88_MOUSE]                                                      | 11.81 | 5  | 7  | 7  | 10 | 0.99 | 0.90 | 0.93 | 1.08 | 1.05 | 0.83 | 0.96 | 0.92 | 0.97 | 0.89 | 1.01 | 0.84 | 0.91 | 104.61 | 6.46 |
| Q9R1V6   | Isoform 12 of<br>Disintegrin and<br>metalloproteinase<br>domain-containing<br>protein 22 OS=Mus<br>musculus<br>GN=Adam22 -<br>[ADA22_MOUSE] | 40.12 | 34 | 30 | 30 | 81 | 0.99 | 1.03 | 1.10 | 1.06 | 1.11 | 0.91 | 0.92 | 0.92 | 0.91 | 0.95 | 0.97 | 0.92 | 0.94 | 106.54 | 7.90 |
| Q8CHX7   | Raftlin-2 OS=Mus<br>musculus GN=Rftn2<br>PE=2 SV=3 -<br>[RFTN2_MOUSE]                                                                       | 28.20 | 2  | 9  | 9  | 22 | 1.11 | 1.16 | 1.08 | 1.09 | 1.01 | 0.92 | 0.91 | 0.92 | 0.85 | 1.03 | 0.93 | 0.94 | 0.93 | 54.94  | 5.50 |
| Q9Z2X1-2 | Isoform 2 of<br>Heterogeneous nuclear<br>ribonucleoprotein F<br>OS=Mus musculus<br>GN=Hnrnpf -<br>[HNRPF_MOUSE]                             | 25.82 | 6  | 5  | 7  | 33 | 0.78 | 0.68 | 0.87 | 0.84 | 1.04 | 0.94 | 1.26 | 0.92 | 1.26 | 0.90 | 1.07 | 0.75 | 0.96 | 43.66  | 5.48 |
| Q80W54   | CAAX prenyl protease<br>1 homolog OS=Mus<br>musculus<br>GN=Zmpste24 PE=1<br>SV=2 -<br>[FACE1_MOUSE]                                         | 6.74  | 2  | 2  | 2  | 5  | 1.00 | 0.91 | 0.82 | 0.94 | 0.99 | 0.89 | 0.97 | 0.92 | 0.92 | 0.94 | 0.94 | 1.11 | 1.11 | 54.70  | 6.95 |
| Q8JZY2   | COMM domain-<br>containing protein 10<br>OS=Mus musculus<br>GN=Comm10 PE=2<br>SV=1 -<br>[COMDA_MOUSE]                                       | 9.90  | 1  | 2  | 2  | 5  | 1.03 | 0.82 | 0.81 | 1.06 | 1.07 | 0.93 | 0.92 | 0.92 | 0.93 | 0.94 | 0.91 | 0.85 | 0.83 | 22.80  | 6.65 |
| Q91W53   | Golgin subfamily A<br>member 7 OS=Mus<br>musculus GN=Golga7<br>PE=2 SV=1 -<br>[GOGA7_MOUSE]                                                 | 8.03  | 2  | 1  | 1  | 2  | 0.88 | 0.94 | 1.06 | 0.86 | 0.98 | 0.92 | 1.04 | 0.92 | 1.04 | 0.89 | 1.01 | 0.85 | 0.97 | 15.78  | 7.05 |
| Q69Z26   | Contactin-4 OS=Mus<br>musculus GN=Cntn4<br>PE=2 SV=2 -<br>[CNTN4_MOUSE]                                                                     | 16.28 | 6  | 11 | 12 | 21 | 0.99 | 0.94 | 1.04 | 1.03 | 1.09 | 0.97 | 1.03 | 0.92 | 0.94 | 0.93 | 0.96 | 0.94 | 1.02 | 113.42 | 7.36 |
| E9Q1W7   | TBC domain-<br>containing protein<br>kinase-like protein<br>OS=Mus musculus<br>GN=Tbck PE=2 SV=1 -<br>[E9Q1W7_MOUSE]                        | 3.81  | 3  | 3  | 3  | 11 | 0.86 | 1.02 | 1.31 | 1.08 | 1.22 | 0.91 | 0.98 | 0.92 | 1.01 | 0.90 | 1.06 | 1.06 | 1.26 | 100.58 | 6.43 |
| Q8K2X8   | General transcription<br>factor IIH subunit 5<br>OS=Mus musculus<br>GN=Grt2h5 PE=1<br>SV=1 -<br>[TF2H5_MOUSE]                               | 36.62 | 1  | 2  | 2  | 4  | 0.87 | 0.75 | 0.86 | 0.82 | 0.94 | 1.02 | 1.17 | 0.92 | 1.05 | 0.80 | 0.92 | 0.80 | 0.92 | 8.03   | 4.65 |

|          |                                                                                                                  |       |    |    |    |    |      |      |      |      |      |      |      |      |      |      |      |      |      |        |      |
|----------|------------------------------------------------------------------------------------------------------------------|-------|----|----|----|----|------|------|------|------|------|------|------|------|------|------|------|------|------|--------|------|
| O88746-2 | Isoform 2 of Target of Myb protein 1 OS=Mus musculus GN=Tom1 - [TOM1_MOUSE]                                      | 67.86 | 1  | 1  | 7  | 18 | 1.00 | 0.99 | 0.99 | 1.06 | 1.07 | 0.87 | 0.87 | 0.92 | 0.92 | 1.01 | 1.01 | 1.01 | 1.02 | 17.78  | 4.78 |
| Q99N50-7 | Isoform 7 of Synaptotagmin-like protein 2 OS=Mus musculus GN=Sytl2 - [SYTL2_MOUSE]                               | 3.92  | 10 | 1  | 1  | 1  | 0.96 | 1.70 | 1.76 | 0.86 | 0.89 | 0.73 | 0.76 | 0.92 | 0.95 | 0.73 | 0.76 | 0.96 | 1.00 | 29.55  | 9.36 |
| Q9D554   | Splicing factor 3A subunit 3 OS=Mus musculus GN=SF3a3 PE=2 SV=2 - [SF3A3_MOUSE]                                  | 17.76 | 1  | 7  | 7  | 13 | 0.93 | 1.04 | 1.01 | 0.87 | 0.90 | 1.02 | 1.10 | 0.92 | 1.07 | 0.92 | 0.90 | 1.00 | 1.06 | 58.81  | 5.34 |
| Q62421   | Endophilin-A3 OS=Mus musculus GN=Sh3gl3 PE=2 SV=1 - [SH3G3_MOUSE]                                                | 41.79 | 5  | 2  | 11 | 31 | 0.78 | 0.71 | 1.15 | 0.89 | 1.45 | 1.14 | 1.70 | 0.92 | 1.16 | 0.92 | 1.12 | 1.05 | 1.63 | 38.91  | 5.12 |
| F2Z3X6   | 3-phosphoinositide-dependent protein kinase 1 OS=Mus musculus GN=Pdk1 PE=2 SV=1 - [F2Z3X6_MOUSE]                 | 18.61 | 5  | 7  | 7  | 12 | 1.02 | 1.00 | 0.95 | 1.06 | 1.04 | 0.94 | 0.95 | 0.92 | 0.91 | 1.03 | 1.00 | 1.12 | 1.07 | 60.90  | 7.39 |
| Q641K1-2 | Isoform 2 of Cytosolic carboxypeptidase 1 OS=Mus musculus GN=Agtpbp1 - [CBPC1_MOUSE]                             | 4.94  | 6  | 5  | 5  | 7  | 0.95 | 1.06 | 1.12 | 1.05 | 1.19 | 0.87 | 0.98 | 0.92 | 1.08 | 1.03 | 1.17 | 0.93 | 1.06 | 132.14 | 7.53 |
| O54991   | Contactin-associated protein 1 OS=Mus musculus GN=Cntnap1 PE=1 SV=2 - [CNTP1_MOUSE]                              | 21.59 | 1  | 23 | 23 | 63 | 1.02 | 1.19 | 1.17 | 1.09 | 1.05 | 0.90 | 0.88 | 0.92 | 0.92 | 0.94 | 0.92 | 1.01 | 1.06 | 156.21 | 7.06 |
| E9Q8N8   | Electrogenic sodium bicarbonate cotransporter 1 OS=Mus musculus GN=Slc4a4 PE=2 SV=1 - [E9Q8N8_MOUSE]             | 19.93 | 5  | 3  | 14 | 59 | 1.05 | 1.35 | 1.03 | 1.02 | 0.91 | 0.87 | 0.76 | 0.92 | 0.87 | 0.87 | 0.80 | 0.92 | 0.76 | 123.01 | 6.89 |
| Q8R555   | Cartilage acidic protein 1 OS=Mus musculus GN=Ctra1 PE=2 SV=1 - [CRAC1_MOUSE]                                    | 16.10 | 1  | 7  | 7  | 11 | 1.10 | 1.12 | 1.18 | 1.02 | 1.01 | 0.93 | 0.90 | 0.92 | 0.81 | 0.92 | 0.89 | 1.02 | 1.01 | 70.28  | 5.14 |
| P51175   | Protoporphyrinogen oxidase OS=Mus musculus GN=Ppox PE=2 SV=1 - [PPOX_MOUSE]                                      | 2.52  | 1  | 1  | 1  | 2  | 0.98 | 1.26 | 1.28 | 1.09 | 1.11 | 0.99 | 1.01 | 0.92 | 0.93 | 1.11 | 1.13 | 1.09 | 1.11 | 50.84  | 8.84 |
| P21447   | Multidrug resistance protein 1A OS=Mus musculus GN=Abcb1a PE=1 SV=3 - [MDR1A_MOUSE]                              | 14.18 | 5  | 13 | 13 | 21 | 0.97 | 1.13 | 1.10 | 1.11 | 1.13 | 0.91 | 0.93 | 0.92 | 0.96 | 0.99 | 1.04 | 0.85 | 0.89 | 140.56 | 8.85 |
| B1AYD3   | Synapse differentiation-inducing gene protein 1 (Fragment) OS=Mus musculus GN=Syndig1 PE=2 SV=1 - [B1AYD3_MOUSE] | 41.10 | 5  | 2  | 2  | 3  | 0.94 | 2.22 | 2.37 | 1.00 | 1.06 | 0.81 | 0.86 | 0.92 | 0.98 | 0.89 | 0.95 | 1.12 | 1.20 | 7.86   | 8.63 |



|          |                                                                                                                                 |       |    |    |    |     |      |      |      |      |      |      |      |      |      |      |      |      |      |        |      |
|----------|---------------------------------------------------------------------------------------------------------------------------------|-------|----|----|----|-----|------|------|------|------|------|------|------|------|------|------|------|------|------|--------|------|
| Q88705   | Potassium/sodium hyperpolarization-activated cyclic nucleotide-gated channel 3 OS=Mus musculus GN=Hcn3 PE=1 SV=1 - [HCN3_MOUSE] | 3.08  | 1  | 2  | 2  | 3   | 1.12 | 1.26 | 1.13 | 0.95 | 0.85 | 1.01 | 0.90 | 0.92 | 0.82 | 1.19 | 1.06 | 1.17 | 1.05 | 86.59  | 9.86 |
| Q55VG5   | AP-1 complex subunit beta-1 OS=Mus musculus GN=Ap1b1 PE=2 SV=1 - [Q55VG5_MOUSE]                                                 | 45.74 | 3  | 16 | 38 | 116 | 1.02 | 0.98 | 1.02 | 1.17 | 1.03 | 0.96 | 0.91 | 0.92 | 0.91 | 0.93 | 0.90 | 1.06 | 0.99 | 101.13 | 5.22 |
| Q8R3F5   | Malonyl-CoA-acyl carrier protein transacylase, mitochondrial OS=Mus musculus GN=Mcat PE=2 SV=3 - [FABD_MOUSE]                   | 10.50 | 1  | 3  | 3  | 5   | 0.88 | 1.03 | 1.17 | 1.02 | 1.16 | 0.89 | 0.89 | 0.92 | 1.04 | 0.88 | 1.00 | 0.90 | 1.03 | 41.90  | 8.10 |
| P97370   | Sodium/potassium-transporting ATPase subunit beta-3 OS=Mus musculus GN=Atp1b3 PE=1 SV=1 - [AT1B3_MOUSE]                         | 39.21 | 1  | 7  | 7  | 16  | 0.99 | 1.01 | 1.01 | 1.10 | 1.13 | 0.86 | 0.95 | 0.92 | 0.91 | 0.89 | 0.93 | 0.96 | 0.91 | 31.76  | 8.51 |
| P63001   | Ras-related C3 botulinum toxin substrate 1 OS=Mus musculus GN=Rac1 PE=1 SV=1 - [RAC1_MOUSE]                                     | 35.94 | 10 | 4  | 8  | 30  | 1.00 | 0.83 | 0.83 | 1.07 | 1.16 | 1.00 | 1.03 | 0.92 | 0.94 | 0.89 | 0.92 | 0.88 | 0.91 | 21.44  | 8.50 |
| P48318   | Glutamate decarboxylase 1 OS=Mus musculus GN=Gad1 PE=2 SV=2 - [DCE1_MOUSE]                                                      | 25.46 | 3  | 10 | 11 | 36  | 1.08 | 1.22 | 0.96 | 1.15 | 1.01 | 0.99 | 0.85 | 0.92 | 0.83 | 1.01 | 0.88 | 1.05 | 0.92 | 66.61  | 7.17 |
| Q9Z1A1   | Protein Tfg OS=Mus musculus GN=Tfg PE=2 SV=1 - [Q9Z1A1_MOUSE]                                                                   | 40.05 | 7  | 13 | 13 | 73  | 0.95 | 0.95 | 0.94 | 0.92 | 0.94 | 0.89 | 0.91 | 0.92 | 0.94 | 0.85 | 0.90 | 0.87 | 0.95 | 42.99  | 5.10 |
| P16388   | Potassium voltage-gated channel subfamily A member 1 OS=Mus musculus GN=Kcna1 PE=2 SV=1 - [KCNA1_MOUSE]                         | 21.21 | 3  | 5  | 8  | 47  | 0.93 | 1.08 | 1.18 | 1.12 | 1.21 | 0.90 | 0.93 | 0.92 | 0.99 | 0.83 | 0.88 | 0.86 | 0.90 | 56.37  | 5.14 |
| Q8K2Y9-  | Isoform 2 of Malcavernin OS=Mus musculus GN=Ccm2 - [CCM2_MOUSE]                                                                 | 24.89 | 6  | 9  | 9  | 25  | 0.90 | 0.94 | 1.02 | 0.84 | 0.91 | 0.85 | 0.92 | 0.92 | 0.99 | 0.86 | 0.94 | 0.95 | 1.03 | 48.22  | 5.39 |
| Q8BFZ2-2 | Isoform 2 of Lipid phosphate phosphatase-related protein type 1 OS=Mus musculus GN=Lppr1 - [LPPR1_MOUSE]                        | 3.05  | 2  | 1  | 1  | 2   | 1.31 | 1.29 | 0.98 | 1.35 | 1.02 | 1.03 | 0.78 | 0.92 | 0.70 | 1.29 | 0.98 | 1.19 | 0.91 | 32.72  | 7.01 |
| P45376   | Aldose reductase OS=Mus musculus GN=Akr1b1 PE=1 SV=3 - [ALDR_MOUSE]                                                             | 39.24 | 5  | 11 | 12 | 31  | 1.05 | 1.02 | 0.94 | 1.06 | 1.03 | 0.91 | 0.87 | 0.92 | 0.86 | 1.00 | 0.90 | 0.98 | 0.88 | 35.71  | 7.18 |

|        |                                                                                                              |       |    |    |    |     |      |      |      |      |      |      |      |      |      |      |      |      |      |        |      |
|--------|--------------------------------------------------------------------------------------------------------------|-------|----|----|----|-----|------|------|------|------|------|------|------|------|------|------|------|------|------|--------|------|
| P35363 | 5-hydroxytryptamine receptor 2A OS=Mus musculus GN=Htr2a PE=2 SV=1 - [SHT2A_MOUSE]                           | 3.61  | 1  | 1  | 1  | 1   | 0.86 | 0.68 | 0.79 | 1.12 | 1.30 | 0.86 | 0.99 | 0.92 | 1.07 | 0.86 | 1.00 | 1.02 | 1.19 | 52.81  | 6.99 |
| O88544 | COP9 signalosome complex subunit 4 OS=Mus musculus GN=Cops4 PE=1 SV=1 - [CSN4_MOUSE]                         | 43.10 | 4  | 13 | 14 | 35  | 1.06 | 1.03 | 0.92 | 1.09 | 1.03 | 0.98 | 0.90 | 0.92 | 0.88 | 1.02 | 0.97 | 0.97 | 0.93 | 46.26  | 5.83 |
| P16858 | Glyceraldehyde-3-phosphate dehydrogenase OS=Mus musculus GN=Gapdh PE=1 SV=2 - [G3P_MOUSE]                    | 88.59 | 6  | 16 | 29 | 804 | 1.01 | 0.88 | 0.87 | 1.06 | 1.04 | 1.01 | 1.01 | 0.92 | 0.92 | 0.96 | 0.97 | 1.00 | 1.01 | 35.79  | 8.25 |
| Q8K2C6 | NAD-dependent protein deacetylase sirtuin-5, mitochondrial OS=Mus musculus GN=Sirt5 PE=1 SV=1 - [SIR5_MOUSE] | 17.42 | 1  | 5  | 5  | 10  | 0.96 | 1.00 | 1.05 | 0.95 | 0.93 | 0.85 | 0.89 | 0.92 | 0.88 | 0.78 | 0.90 | 0.81 | 0.87 | 34.11  | 8.53 |
| Q9ESN9 | Isoform 1d of C-Jun-amino-terminal kinase-interacting protein 3 OS=Mus musculus GN=Mapk8ip3 - [JIP3_MOUSE]   | 20.36 | 11 | 19 | 21 | 53  | 0.99 | 0.84 | 0.79 | 0.93 | 0.94 | 0.91 | 0.92 | 0.92 | 0.92 | 0.93 | 0.95 | 0.89 | 0.93 | 147.38 | 5.45 |
| Q9D0G0 | 28S ribosomal protein S30, mitochondrial OS=Mus musculus GN=Mrps30 PE=2 SV=1 - [RT30_MOUSE]                  | 9.28  | 1  | 3  | 3  | 5   | 1.00 | 0.87 | 0.92 | 0.92 | 1.01 | 0.93 | 0.90 | 0.92 | 0.92 | 0.97 | 0.89 | 0.91 | 1.04 | 49.91  | 9.38 |
| P56392 | Cytochrome c oxidase subunit 7A1, mitochondrial OS=Mus musculus GN=Cox7a1 PE=2 SV=1 - [CX7A1_MOUSE]          | 16.25 | 1  | 1  | 1  | 2   | 1.00 | 0.78 | 0.78 | 0.94 | 0.94 | 1.14 | 1.14 | 0.92 | 0.92 | 0.93 | 0.93 | 0.82 | 0.82 | 8.98   | 9.79 |
| Q80X16 | Mitogen-activated protein kinase kinase kinase 11 OS=Mus musculus GN=Map3k11 PE=1 SV=1 - [M3K11_MOUSE]       | 2.71  | 2  | 1  | 2  | 3   | 0.98 | 1.22 | 1.24 | 0.99 | 1.00 | 1.00 | 1.01 | 0.92 | 0.93 | 0.90 | 0.91 | 1.01 | 1.03 | 93.17  | 8.43 |
| Q9D6C8 | Copine-4 OS=Mus musculus GN=Cpne4 PE=2 SV=1 - [Q9D6C8_MOUSE]                                                 | 18.95 | 2  | 6  | 7  | 15  | 1.04 | 0.96 | 0.84 | 1.09 | 1.09 | 1.04 | 1.00 | 0.92 | 0.87 | 0.99 | 0.95 | 1.03 | 1.00 | 52.75  | 5.64 |
| Q3TET1 | Kinesin-like protein KIF3A OS=Mus musculus GN=Kif3a PE=2 SV=1 - [Q3TET1_MOUSE]                               | 11.10 | 10 | 6  | 7  | 13  | 0.92 | 1.08 | 1.14 | 1.02 | 1.07 | 0.92 | 0.98 | 0.92 | 1.00 | 0.88 | 1.03 | 0.97 | 1.06 | 79.40  | 6.25 |
| Q8N7N5 | DDB1- and CUL4-associated factor 8 OS=Mus musculus GN=Deaf8 PE=1 SV=1 - [DCAF8_MOUSE]                        | 9.48  | 2  | 5  | 5  | 10  | 0.85 | 0.97 | 1.11 | 0.88 | 1.04 | 0.94 | 1.05 | 0.92 | 1.03 | 0.90 | 0.96 | 0.89 | 0.98 | 65.99  | 5.87 |

|        |                                                                                                                          |       |    |    |    |     |      |      |      |      |      |      |      |      |      |      |      |      |      |        |      |
|--------|--------------------------------------------------------------------------------------------------------------------------|-------|----|----|----|-----|------|------|------|------|------|------|------|------|------|------|------|------|------|--------|------|
| P14231 | Sodium/potassium-transporting ATPase subunit beta-2<br>OS=Mus musculus<br>GN=Atp1b2 PE=1<br>SV=2 -<br>[AT1B2_MOUSE]      | 37.24 | 2  | 9  | 9  | 110 | 1.03 | 1.00 | 1.05 | 1.14 | 1.11 | 0.89 | 0.87 | 0.92 | 0.91 | 0.99 | 0.96 | 0.93 | 0.95 | 33.32  | 8.31 |
| P51906 | Excitatory amino acid transporter 3 OS=Mus musculus<br>GN=Slc1a1 PE=1<br>SV=2 -<br>[EAA3_MOUSE]                          | 8.60  | 1  | 2  | 2  | 3   | 1.05 | 1.42 | 1.35 | 1.39 | 1.32 | 1.06 | 1.00 | 0.92 | 0.88 | 0.90 | 0.86 | 1.15 | 1.10 | 56.66  | 6.11 |
| Q61292 | Laminin subunit beta-2<br>OS=Mus musculus<br>GN=Lamb2 PE=2<br>SV=2 -<br>[LAMB2_MOUSE]                                    | 10.84 | 1  | 16 | 16 | 34  | 0.92 | 0.94 | 1.03 | 0.91 | 1.00 | 0.87 | 0.94 | 0.92 | 1.07 | 0.92 | 1.01 | 0.83 | 0.96 | 196.45 | 6.67 |
| Q3UHK6 | Teneurin-4 OS=Mus musculus<br>GN=Tenn4 PE=1<br>SV=2 -<br>[TEN4_MOUSE]                                                    | 11.37 | 6  | 18 | 21 | 42  | 1.07 | 1.10 | 0.96 | 1.06 | 1.02 | 0.86 | 0.84 | 0.92 | 0.89 | 0.89 | 0.86 | 0.99 | 0.94 | 308.23 | 6.57 |
| P12960 | Contactin-1 OS=Mus musculus<br>GN=Cntn1 PE=1<br>SV=1 -<br>[CNTN1_MOUSE]                                                  | 55.10 | 1  | 52 | 52 | 435 | 1.00 | 1.03 | 1.02 | 0.99 | 0.99 | 0.91 | 0.90 | 0.92 | 0.92 | 0.92 | 0.89 | 0.93 | 0.95 | 113.32 | 6.16 |
| P16675 | Lysosomal protective protein OS=Mus musculus<br>GN=Ctsa PE=1<br>SV=1 -<br>[PPGB_MOUSE]                                   | 9.28  | 3  | 3  | 3  | 5   | 0.82 | 1.12 | 1.38 | 1.11 | 1.23 | 0.92 | 1.01 | 0.92 | 1.12 | 1.01 | 1.19 | 0.91 | 1.11 | 53.81  | 5.86 |
| Q7TMK9 | Heterogeneous nuclear ribonucleoprotein Q OS=Mus musculus<br>GN=Syncrip PE=1<br>SV=2 -<br>[HNRPQ_MOUSE]                  | 44.46 | 5  | 1  | 24 | 112 | 0.93 | 0.64 | 0.68 | 0.65 | 0.70 | 0.83 | 0.89 | 0.92 | 0.98 | 0.58 | 0.62 | 0.70 | 0.75 | 69.59  | 8.59 |
| P20491 | High affinity immunoglobulin epsilon receptor subunit gamma OS=Mus musculus<br>GN=Fcer1g PE=1<br>SV=1 -<br>[FCERG_MOUSE] | 12.79 | 1  | 1  | 1  | 2   | 1.08 | 1.03 | 0.95 | 0.98 | 0.91 | 0.90 | 0.83 | 0.92 | 0.85 | 0.96 | 0.89 | 0.88 | 0.81 | 9.65   | 7.97 |
| Q8K212 | Phosphofurin acidic cluster sorting protein 1 OS=Mus musculus<br>GN=Pacs1 PE=1<br>SV=2 -<br>[PACS1_MOUSE]                | 20.29 | 1  | 13 | 14 | 55  | 1.11 | 1.01 | 0.93 | 1.10 | 1.00 | 0.94 | 0.89 | 0.92 | 0.84 | 0.96 | 0.91 | 1.03 | 0.94 | 104.76 | 7.74 |
| E9QLL2 | Dynamin-3 OS=Mus musculus<br>GN=Dnm3 PE=2<br>SV=1 -<br>[E9QLL2_MOUSE]                                                    | 48.67 | 12 | 18 | 33 | 119 | 0.95 | 1.10 | 1.18 | 1.09 | 1.17 | 0.92 | 1.01 | 0.92 | 1.02 | 0.97 | 1.07 | 1.00 | 1.11 | 97.21  | 8.56 |
| Q99KV1 | DnaJ homolog subfamily B member 11 OS=Mus musculus<br>GN=Dnajb11 PE=1<br>SV=1 -<br>[DJB11_MOUSE]                         | 30.73 | 1  | 7  | 7  | 24  | 0.91 | 0.77 | 0.81 | 0.92 | 1.00 | 0.90 | 0.96 | 0.92 | 0.95 | 0.83 | 0.89 | 0.87 | 0.92 | 40.53  | 6.32 |
| E9PYH3 | Ethanolamine-phosphate phosphatase OS=Mus musculus<br>GN=Agxt2l1 PE=2<br>SV=1 -<br>[E9PYH3_MOUSE]                        | 2.23  | 2  | 1  | 1  | 2   | 1.01 | 0.77 | 0.76 | 0.88 | 0.87 | 0.73 | 0.71 | 0.92 | 0.91 | 0.88 | 0.86 | 0.60 | 0.60 | 54.83  | 6.87 |

|          |                                                                                                         |       |    |     |     |      |      |      |      |      |      |      |      |      |      |      |      |      |      |        |      |
|----------|---------------------------------------------------------------------------------------------------------|-------|----|-----|-----|------|------|------|------|------|------|------|------|------|------|------|------|------|------|--------|------|
| Q6PHN9   | Ras-related protein Rab35 OS=Mus musculus GN=Rab35 PE=1 SV=1 - [RAB35_MOUSE]                            | 48.26 | 10 | 7   | 9   | 73   | 1.09 | 1.09 | 0.99 | 1.09 | 1.01 | 0.89 | 0.88 | 0.92 | 0.83 | 0.90 | 0.88 | 1.01 | 1.00 | 23.01  | 8.29 |
| Q8R1N4   | NudC domain-containing protein 3 OS=Mus musculus GN=Nudcd3 PE=2 SV=3 - [NUDC3_MOUSE]                    | 20.39 | 5  | 5   | 5   | 11   | 0.89 | 0.91 | 1.03 | 0.97 | 1.10 | 0.88 | 0.97 | 0.92 | 1.03 | 0.94 | 1.12 | 0.94 | 1.08 | 40.86  | 5.26 |
| Q3U2A8   | Valine-tRNA ligase, mitochondrial OS=Mus musculus GN=Vars2 PE=2 SV=2 - [SYVM_MOUSE]                     | 6.70  | 4  | 5   | 5   | 8    | 1.00 | 1.04 | 1.04 | 1.08 | 1.08 | 1.05 | 1.02 | 0.92 | 0.98 | 1.10 | 1.04 | 1.06 | 1.19 | 118.39 | 7.14 |
| Q9D2E2-2 | Isoform 2 of Target of EGR1 protein 1 OS=Mus musculus GN=Toe1 - [TOE1_MOUSE]                            | 3.65  | 2  | 1   | 1   | 1    | 0.91 | 1.03 | 1.13 | 0.89 | 0.98 | 0.81 | 0.89 | 0.92 | 1.01 | 0.96 | 1.06 | 0.90 | 0.99 | 37.13  | 6.77 |
| P62700   | Protein yippe-like 5 OS=Mus musculus GN=Ypel5 PE=2 SV=1 - [YPEL5_MOUSE]                                 | 21.49 | 1  | 2   | 2   | 4    | 0.95 | 1.14 | 1.20 | 0.92 | 0.97 | 0.86 | 0.90 | 0.92 | 0.97 | 0.86 | 0.90 | 0.92 | 0.97 | 13.83  | 7.31 |
| Q6PIE5   | Sodium/potassium-transporting ATPase subunit alpha-2 OS=Mus musculus GN=Atpl2 PE=1 SV=1 - [AT1A2_MOUSE] | 55.59 | 9  | 37  | 62  | 1114 | 0.98 | 1.01 | 1.05 | 1.08 | 1.10 | 0.90 | 0.90 | 0.92 | 0.92 | 0.97 | 0.96 | 0.90 | 0.94 | 112.15 | 5.55 |
| K3W4T7   | Neurexin-1 OS=Mus musculus GN=Nrxn1 PE=4 SV=1 - [K3W4T7_MOUSE]                                          | 35.02 | 14 | 29  | 35  | 157  | 1.03 | 0.98 | 0.98 | 1.03 | 0.99 | 0.92 | 0.88 | 0.92 | 0.89 | 0.90 | 0.89 | 0.92 | 0.91 | 134.37 | 6.19 |
| D3YTZ7   | Josephin-2 OS=Mus musculus GN=Josd2 PE=2 SV=1 - [D3YTZ7_MOUSE]                                          | 8.22  | 2  | 1   | 1   | 2    | 1.16 | 1.48 | 1.27 | 1.06 | 0.92 | 1.06 | 0.91 | 0.92 | 0.80 | 0.92 | 0.79 | 1.02 | 0.88 | 16.11  | 5.49 |
| Q68FG2   | Protein Sptbn2 OS=Mus musculus GN=Sptbn2 PE=2 SV=1 - [Q68FG2_MOUSE]                                     | 58.71 | 2  | 100 | 111 | 462  | 0.91 | 1.01 | 1.12 | 1.05 | 1.14 | 0.92 | 1.00 | 0.92 | 1.02 | 0.93 | 1.03 | 0.99 | 1.09 | 270.76 | 5.86 |
| Q6PAJ1   | Breakpoint cluster region protein OS=Mus musculus GN=Ber PE=1 SV=3 - [BCR_MOUSE]                        | 15.20 | 1  | 12  | 13  | 28   | 1.09 | 1.09 | 1.01 | 1.11 | 1.03 | 0.99 | 0.92 | 0.92 | 0.90 | 1.14 | 1.01 | 1.23 | 1.10 | 142.98 | 6.92 |
| Q5SZV5   | Dyslexia-associated protein KIAA0319 homolog OS=Mus musculus GN=Kiaa0319 PE=2 SV=1 - [K0319_MOUSE]      | 1.11  | 1  | 1   | 1   | 1    | 1.03 | 1.14 | 1.10 | 1.22 | 1.18 | 1.10 | 1.06 | 0.92 | 0.89 | 0.96 | 0.93 | 1.40 | 1.35 | 117.91 | 5.17 |
| Q5SX99   | Leucine-rich repeat-containing protein 48 OS=Mus musculus GN=Lrrc48 PE=2 SV=1 - [Q5SX99_MOUSE]          | 5.77  | 4  | 1   | 1   | 1    | 1.37 | 0.61 | 0.45 | 0.96 | 0.70 | 1.15 | 0.84 | 0.92 | 0.67 | 0.88 | 0.64 | 1.04 | 0.76 | 23.77  | 4.70 |

|          |                                                                                                                            |       |   |    |     |      |      |      |      |      |      |      |      |      |      |      |      |      |      |        |      |
|----------|----------------------------------------------------------------------------------------------------------------------------|-------|---|----|-----|------|------|------|------|------|------|------|------|------|------|------|------|------|------|--------|------|
| Q69ZF3   | Non-lysosomal glucosylceramidase OS=Mus musculus GN=Gba2 PE=1 SV=2 - [GBA2_MOUSE]                                          | 14.16 | 2 | 9  | 9   | 18   | 1.04 | 1.09 | 1.09 | 1.06 | 1.02 | 0.95 | 0.87 | 0.92 | 0.88 | 0.93 | 1.02 | 1.05 | 1.04 | 103.23 | 5.59 |
| Q8C878   | NEDD8-activating enzyme E1 catalytic subunit OS=Mus musculus GN=Uba3 PE=1 SV=2 - [UBA3_MOUSE]                              | 35.50 | 3 | 11 | 11  | 27   | 1.02 | 0.88 | 0.96 | 1.06 | 1.06 | 0.99 | 0.96 | 0.92 | 0.90 | 0.98 | 0.96 | 0.93 | 0.95 | 51.70  | 5.45 |
| Q922H4   | Mannose-1-phosphate guanylyltransferase alpha OS=Mus musculus GN=Gmppa PE=2 SV=1 - [GMPPA_MOUSE]                           | 11.43 | 6 | 3  | 3   | 5    | 1.00 | 1.07 | 1.07 | 1.03 | 1.05 | 0.88 | 0.89 | 0.92 | 0.89 | 0.87 | 0.89 | 0.88 | 0.88 | 46.22  | 7.62 |
| Q3V2N7   | Protein AI413582 OS=Mus musculus GN=AI413582 PE=4 SV=1 - [Q3V2N7_MOUSE]                                                    | 6.86  | 1 | 1  | 1   | 2    | 0.97 | 0.68 | 0.70 | 0.80 | 0.83 | 0.96 | 0.99 | 0.92 | 0.95 | 0.86 | 0.89 | 0.91 | 0.94 | 11.55  | 6.95 |
| Q8VCU2   | Glycosylphosphatidylinositol specific phospholipase D1 OS=Mus musculus GN=Gpld1 PE=2 SV=1 - [Q8VCU2_MOUSE]                 | 4.51  | 2 | 3  | 3   | 6    | 1.02 | 1.18 | 1.12 | 1.01 | 0.98 | 0.92 | 0.89 | 0.92 | 0.90 | 1.01 | 0.99 | 1.01 | 0.93 | 93.56  | 6.80 |
| Q8C8R3-2 | Isoform 2 of Ankyrin-2 OS=Mus musculus GN=Ank2 - [ANK2_MOUSE]                                                              | 58.61 | 2 | 5  | 159 | 1021 | 1.03 | 1.11 | 1.01 | 1.05 | 1.05 | 1.04 | 1.02 | 0.92 | 0.92 | 1.00 | 0.94 | 1.01 | 0.98 | 428.50 | 5.16 |
| P63280   | SUMO-conjugating enzyme UBC9 OS=Mus musculus GN=Ube2i PE=1 SV=1 - [UBC9_MOUSE]                                             | 41.14 | 4 | 3  | 3   | 6    | 0.96 | 0.86 | 0.90 | 1.05 | 1.11 | 0.83 | 0.81 | 0.92 | 1.07 | 0.80 | 0.79 | 0.82 | 1.01 | 18.00  | 8.66 |
| Q99LC2   | Cleavage stimulation factor subunit 1 OS=Mus musculus GN=Cstf1 PE=2 SV=1 - [CSTF1_MOUSE]                                   | 9.28  | 2 | 2  | 2   | 4    | 0.80 | 1.08 | 1.35 | 0.95 | 1.19 | 0.95 | 1.19 | 0.92 | 1.15 | 0.86 | 1.08 | 0.89 | 1.11 | 48.35  | 6.58 |
| Q9JKF1   | Ras GTPase-activating-like protein IQGAP1 OS=Mus musculus GN=Iqgap1 PE=1 SV=2 - [IQGA1_MOUSE]                              | 1.69  | 1 | 2  | 2   | 9    | 0.88 | 1.12 | 1.25 | 1.01 | 1.15 | 0.82 | 0.96 | 0.92 | 1.02 | 0.90 | 1.12 | 0.90 | 1.06 | 188.62 | 6.48 |
| Q99J56   | Derlin-1 OS=Mus musculus GN=Derl1 PE=2 SV=1 - [DERL1_MOUSE]                                                                | 9.96  | 1 | 2  | 2   | 4    | 0.65 | 1.05 | 1.61 | 0.97 | 1.50 | 0.69 | 1.05 | 0.92 | 1.42 | 0.68 | 1.05 | 0.67 | 1.03 | 28.82  | 9.51 |
| Q55VR0-2 | Isoform 2 of TBC1 domain family member 9B OS=Mus musculus GN=Tbc1d9b - [TBC9B_MOUSE]                                       | 2.57  | 2 | 2  | 2   | 6    | 1.02 | 1.26 | 1.23 | 1.10 | 1.04 | 0.96 | 0.93 | 0.92 | 0.93 | 0.95 | 1.01 | 1.00 | 0.98 | 139.84 | 5.35 |
| Q8BIZ1-2 | Isoform 2 of Ankyrin repeat and sterile alpha motif domain-containing protein 1B OS=Mus musculus GN=Anks1b - [ANS1B_MOUSE] | 26.29 | 5 | 2  | 10  | 20   | 0.97 | 1.16 | 1.19 | 1.14 | 1.16 | 0.97 | 0.97 | 0.92 | 0.87 | 0.99 | 1.00 | 0.99 | 1.03 | 48.31  | 7.97 |

|        |                                                                                                               |       |   |    |    |    |      |      |      |      |      |      |      |      |      |      |      |      |      |        |      |
|--------|---------------------------------------------------------------------------------------------------------------|-------|---|----|----|----|------|------|------|------|------|------|------|------|------|------|------|------|------|--------|------|
| Q7TMY8 | Isoform 3 of E3 ubiquitin-protein ligase HUWE1 OS=Mus musculus GN=Huwe1 - [HUWE1_MOUSE]                       | 7.61  | 6 | 22 | 22 | 49 | 0.97 | 1.11 | 1.15 | 1.10 | 1.14 | 0.93 | 0.99 | 0.92 | 0.97 | 1.00 | 1.01 | 1.10 | 1.12 | 480.60 | 5.20 |
| Q8BRK8 | 5'-AMP-activated protein kinase catalytic subunit alpha-2 OS=Mus musculus GN=Prkaa2 PE=1 SV=3 - [AAPK2_MOUSE] | 10.87 | 1 | 3  | 5  | 8  | 0.92 | 1.05 | 1.21 | 1.08 | 1.18 | 0.87 | 1.06 | 0.92 | 1.07 | 0.96 | 1.04 | 0.87 | 0.96 | 61.98  | 7.87 |
| Q9J190 | E3 ubiquitin-protein ligase RNF14 OS=Mus musculus GN=Rnf14 PE=2 SV=2 - [RNF14_MOUSE]                          | 14.23 | 3 | 6  | 6  | 15 | 0.96 | 0.84 | 0.88 | 0.93 | 0.95 | 0.99 | 0.97 | 0.92 | 0.99 | 0.87 | 0.90 | 0.91 | 0.91 | 54.89  | 4.70 |
| Q8R2Y2 | Isoform 2 of Cell surface glycoprotein MUC18 OS=Mus musculus GN=Mcam - [MUC18_MOUSE]                          | 19.47 | 2 | 9  | 9  | 17 | 0.92 | 1.09 | 1.02 | 0.99 | 0.97 | 0.93 | 1.02 | 0.92 | 1.12 | 0.98 | 1.08 | 0.99 | 1.02 | 66.86  | 5.82 |
| A2AHT3 | Calsenilin isoform 4 OS=Mus musculus GN=Kcnp3 PE=2 SV=1 - [A2AHT3_MOUSE]                                      | 17.61 | 4 | 1  | 4  | 8  | 0.99 | 0.87 | 0.87 | 0.78 | 0.79 | 0.91 | 0.91 | 0.92 | 0.93 | 0.91 | 0.92 | 1.01 | 1.02 | 32.11  | 5.40 |
| Q9Z1G3 | V-type proton ATPase subunit C 1 OS=Mus musculus GN=Atp6v1c1 PE=1 SV=4 - [VATC1_MOUSE]                        | 58.12 | 1 | 21 | 21 | 80 | 0.97 | 0.97 | 0.94 | 1.09 | 1.09 | 0.98 | 0.97 | 0.92 | 0.91 | 0.98 | 1.04 | 1.04 | 1.02 | 43.86  | 7.46 |
| Q6PGN3 | Isoform 2 of Serine/threonine-protein kinase DCLK2 OS=Mus musculus GN=Delk2 - [DCLK2_MOUSE]                   | 28.21 | 6 | 13 | 13 | 29 | 0.99 | 0.83 | 0.83 | 1.03 | 1.05 | 0.96 | 1.00 | 0.92 | 0.94 | 0.97 | 0.99 | 1.07 | 1.10 | 82.80  | 8.44 |
| B1AY85 | Plexin domain-containing protein 2 OS=Mus musculus GN=Ptxdc2 PE=2 SV=1 - [B1AY85_MOUSE]                       | 3.98  | 2 | 2  | 2  | 3  | 1.01 | 1.03 | 1.02 | 0.93 | 0.92 | 0.91 | 0.89 | 0.92 | 0.91 | 0.92 | 0.91 | 1.02 | 1.01 | 59.35  | 6.60 |
| Q9JLZ3 | Methylglutaconyl-CoA hydratase, mitochondrial OS=Mus musculus GN=Auh PE=2 SV=1 - [AUHM_MOUSE]                 | 29.62 | 7 | 10 | 10 | 51 | 0.96 | 1.02 | 0.98 | 0.96 | 1.01 | 0.95 | 1.02 | 0.92 | 0.95 | 0.92 | 0.97 | 0.94 | 1.02 | 33.37  | 9.51 |
| F8WHP5 | Phospholipase DDHD1 OS=Mus musculus GN=Dhd1 PE=2 SV=1 - [F8WHP5_MOUSE]                                        | 6.07  | 8 | 4  | 4  | 6  | 0.96 | 1.05 | 1.08 | 1.03 | 1.09 | 0.99 | 0.95 | 0.92 | 0.93 | 1.01 | 0.99 | 1.09 | 1.12 | 94.73  | 5.69 |
| B7ZC46 | Septin-8 OS=Mus musculus GN=Sept8 PE=2 SV=1 - [B7ZC46_MOUSE]                                                  | 44.77 | 2 | 1  | 18 | 86 | 1.24 | 0.87 | 0.70 | 1.09 | 0.87 | 0.98 | 0.78 | 0.92 | 0.74 | 0.86 | 0.69 | 0.96 | 0.77 | 50.86  | 6.09 |
| Q91YM4 | Isoform 2 of Protein TBRG4 OS=Mus musculus GN=Tbrg4 - [TBRG4_MOUSE]                                           | 4.50  | 5 | 2  | 2  | 3  | 1.04 | 1.00 | 0.96 | 1.29 | 1.24 | 0.89 | 0.85 | 0.92 | 0.88 | 0.95 | 0.92 | 1.00 | 0.96 | 68.10  | 8.32 |

|          |                                                                                                         |       |    |   |    |    |      |      |      |      |      |      |      |      |      |      |      |      |      |        |      |
|----------|---------------------------------------------------------------------------------------------------------|-------|----|---|----|----|------|------|------|------|------|------|------|------|------|------|------|------|------|--------|------|
| Q91ZR1   | Ras-related protein Rab4B OS=Mus musculus GN=Rab4b PE=2 SV=2 - [RAB4B_MOUSE]                            | 40.38 | 10 | 4 | 7  | 58 | 1.09 | 1.26 | 1.16 | 1.07 | 1.02 | 0.85 | 0.78 | 0.92 | 0.87 | 1.01 | 0.91 | 1.05 | 0.93 | 23.61  | 6.06 |
| A2AEG6   | Glycoprotein m6b, isoform CRA_g OS=Mus musculus GN=Gpm6b PE=4 SV=1 - [A2AEG6_MOUSE]                     | 23.78 | 10 | 7 | 7  | 21 | 0.96 | 1.12 | 1.07 | 1.21 | 1.21 | 0.92 | 0.97 | 0.92 | 0.95 | 0.92 | 0.94 | 0.95 | 0.96 | 36.17  | 6.14 |
| O35083   | 1-acyl-sn-glycerol-3-phosphate acyltransferase alpha OS=Mus musculus GN=Agpat1 PE=2 SV=1 - [PLCA_MOUSE] | 18.95 | 1  | 4 | 4  | 7  | 0.95 | 1.13 | 1.11 | 1.11 | 1.17 | 0.89 | 1.00 | 0.93 | 0.91 | 1.00 | 1.00 | 1.05 | 1.05 | 31.69  | 9.14 |
| Q9D9E0-2 | Isoform 2 of Solute carrier family 22 member 17 OS=Mus musculus GN=Slc22a17 - [S22AH_MOUSE]             | 5.46  | 2  | 1 | 1  | 4  | 1.10 | 1.18 | 1.08 | 1.40 | 1.27 | 0.96 | 0.87 | 0.93 | 0.84 | 1.00 | 0.91 | 1.16 | 1.06 | 39.89  | 8.43 |
| Q8K0Y7   | Uncharacterized protein C9orf142 homolog OS=Mus musculus PE=2 SV=1 - [C1142_MOUSE]                      | 8.78  | 1  | 1 | 1  | 2  | 1.25 | 0.94 | 0.75 | 0.83 | 0.66 | 0.92 | 0.73 | 0.93 | 0.74 | 0.95 | 0.76 | 0.97 | 0.77 | 21.96  | 5.66 |
| A2AAE1-  | Isoform 4 of Uncharacterized protein KIAA1109 OS=Mus musculus GN=Kiaa1109 - [K1109_MOUSE]               | 0.45  | 5  | 1 | 1  | 2  | 0.76 | 0.94 | 1.23 | 1.16 | 1.52 | 0.84 | 1.10 | 0.93 | 1.21 | 0.89 | 1.17 | 0.90 | 1.18 | 510.03 | 6.62 |
| Q8CIE2-2 | Isoform 2 of Zinc finger MIZ domain-containing protein 2 OS=Mus musculus GN=Zmiz2 - [ZMIZ2_MOUSE]       | 1.01  | 5  | 1 | 1  | 2  | 0.91 | 0.90 | 0.98 | 0.99 | 1.08 | 0.94 | 1.02 | 0.93 | 1.01 | 0.93 | 1.02 | 1.04 | 1.14 | 93.81  | 7.14 |
| E9Q0N0   | Intersectin-1 OS=Mus musculus GN=Itsn1 PE=2 SV=1 - [E9Q0N0_MOUSE]                                       | 23.56 | 11 | 1 | 35 | 86 | 0.77 | 0.57 | 0.73 | 0.87 | 1.13 | 0.81 | 1.05 | 0.93 | 1.19 | 0.95 | 1.24 | 0.80 | 1.04 | 194.78 | 7.91 |
| P61290   | Proteasome activator complex subunit 3 OS=Mus musculus GN=Psme3 PE=1 SV=1 - [PSME3_MOUSE]               | 22.05 | 3  | 5 | 5  | 8  | 1.03 | 0.93 | 0.99 | 0.98 | 0.94 | 0.91 | 0.97 | 0.93 | 0.98 | 0.77 | 0.99 | 0.95 | 1.12 | 29.49  | 5.95 |
| P33622   | Apolipoprotein C-III OS=Mus musculus GN=Apoc3 PE=2 SV=2 - [APOC3_MOUSE]                                 | 19.19 | 2  | 1 | 1  | 2  | 0.67 | 1.01 | 1.49 | 0.56 | 0.82 | 0.68 | 1.01 | 0.93 | 1.37 | 1.90 | 2.82 | 1.23 | 1.83 | 10.98  | 4.75 |
| P19324   | Serpin H1 OS=Mus musculus GN=Serpinh1 PE=1 SV=3 - [SERPH_MOUSE]                                         | 10.31 | 1  | 3 | 3  | 5  | 0.89 | 1.00 | 1.11 | 1.11 | 1.20 | 0.95 | 1.06 | 0.93 | 1.05 | 0.99 | 1.12 | 1.09 | 1.22 | 46.50  | 8.82 |
| Q9ERL9   | Guanylate cyclase soluble subunit alpha-3 OS=Mus musculus GN=Gucyl1a3 PE=2 SV=2 - [GCYA3_MOUSE]         | 5.93  | 1  | 3 | 3  | 7  | 1.10 | 1.12 | 0.84 | 1.21 | 1.07 | 0.93 | 0.78 | 0.93 | 0.85 | 1.11 | 1.03 | 1.07 | 0.99 | 77.54  | 7.17 |

|          |                                                                                                               |       |   |    |    |     |      |      |      |      |      |      |      |      |      |      |      |      |      |        |      |
|----------|---------------------------------------------------------------------------------------------------------------|-------|---|----|----|-----|------|------|------|------|------|------|------|------|------|------|------|------|------|--------|------|
| Q7TS64   | Adrenergic receptor kinase, beta 1 OS=Mus musculus GN=Adrbk1 PE=2 SV=1 - [Q7TS64_MOUSE]                       | 23.18 | 7 | 8  | 12 | 26  | 0.98 | 1.04 | 1.05 | 1.02 | 1.04 | 0.96 | 0.93 | 0.93 | 0.95 | 0.96 | 0.99 | 0.92 | 0.97 | 75.11  | 7.17 |
| E9Q3L2   | Protein P4ka OS=Mus musculus GN=P4ka PE=4 SV=1 - [E9Q3L2_MOUSE]                                               | 13.85 | 5 | 22 | 22 | 54  | 0.95 | 1.10 | 1.04 | 1.13 | 1.19 | 0.88 | 0.88 | 0.93 | 0.91 | 0.90 | 0.95 | 1.09 | 1.07 | 231.21 | 6.87 |
| P48320   | Glutamate decarboxylase 2 OS=Mus musculus GN=Gad2 PE=2 SV=1 - [DCE2_MOUSE]                                    | 18.97 | 1 | 7  | 8  | 24  | 1.12 | 0.98 | 0.88 | 1.02 | 0.94 | 0.91 | 0.82 | 0.93 | 0.82 | 1.09 | 1.04 | 1.05 | 0.98 | 65.18  | 6.90 |
| P54071   | Isocitrate dehydrogenase [NADP], mitochondrial OS=Mus musculus GN=Idh2 PE=1 SV=3 - [IDHP_MOUSE]               | 37.83 | 2 | 16 | 17 | 41  | 1.03 | 0.88 | 0.95 | 1.10 | 1.23 | 0.96 | 0.98 | 0.93 | 0.89 | 1.06 | 1.00 | 1.09 | 1.03 | 50.87  | 8.69 |
| D3Z484   | PIH1 domain-containing protein 1 (Fragment) OS=Mus musculus GN=Pih1d1 PE=2 SV=1 - [D3Z484_MOUSE]              | 11.03 | 2 | 1  | 1  | 1   | 0.94 | 0.86 | 0.91 | 0.75 | 0.79 | 1.08 | 1.14 | 0.93 | 0.98 | 0.94 | 1.00 | 0.88 | 0.93 | 14.94  | 4.49 |
| Q8C341   | SUN domain-containing ossification factor OS=Mus musculus GN=Suco PE=1 SV=3 - [SUCO_MOUSE]                    | 0.96  | 2 | 1  | 1  | 2   | 0.97 | 1.14 | 1.18 | 1.23 | 1.27 | 0.93 | 0.96 | 0.93 | 0.95 | 1.08 | 1.12 | 1.07 | 1.11 | 139.08 | 5.02 |
| E9PY16   | Protein Adap1 OS=Mus musculus GN=Adap1 PE=2 SV=1 - [E9PY16_MOUSE]                                             | 33.69 | 2 | 10 | 10 | 23  | 0.99 | 0.86 | 0.88 | 1.07 | 1.09 | 0.98 | 0.95 | 0.93 | 0.93 | 0.97 | 0.96 | 1.01 | 0.97 | 43.34  | 8.65 |
| Q9CQ40   | 39S ribosomal protein L49, mitochondrial OS=Mus musculus GN=Mrl49 PE=2 SV=1 - [RM49_MOUSE]                    | 44.58 | 1 | 6  | 6  | 15  | 0.98 | 0.80 | 0.89 | 0.92 | 0.97 | 0.83 | 0.85 | 0.93 | 0.89 | 0.80 | 0.79 | 0.81 | 0.81 | 19.12  | 9.50 |
| P41242-3 | Isoform 3 of Megakaryocyte-associated tyrosine-protein kinase OS=Mus musculus GN=Matk - [MATK_MOUSE]          | 6.45  | 7 | 2  | 2  | 3   | 0.91 | 0.78 | 0.86 | 0.91 | 1.00 | 1.00 | 1.09 | 0.93 | 1.01 | 0.93 | 1.02 | 0.96 | 1.05 | 51.46  | 8.40 |
| Q8CJ61   | CKLF-like MARVEL transmembrane domain-containing protein 4 OS=Mus musculus GN=Cmtm4 PE=2 SV=1 - [CKLF4_MOUSE] | 4.81  | 1 | 1  | 1  | 2   | 0.97 | 1.02 | 1.05 | 1.03 | 1.06 | 0.99 | 1.01 | 0.93 | 0.95 | 0.99 | 1.02 | 0.90 | 0.93 | 22.91  | 5.59 |
| P46097   | Synaptotagmin-2 OS=Mus musculus GN=Syt2 PE=1 SV=1 - [SYT2_MOUSE]                                              | 48.34 | 1 | 11 | 17 | 120 | 0.98 | 1.09 | 1.17 | 1.02 | 1.08 | 0.86 | 0.88 | 0.93 | 0.95 | 0.94 | 0.90 | 0.82 | 0.87 | 47.23  | 7.99 |



|         |                                                                                                                             |       |    |    |    |     |      |      |      |      |      |      |      |      |      |      |      |      |      |        |       |
|---------|-----------------------------------------------------------------------------------------------------------------------------|-------|----|----|----|-----|------|------|------|------|------|------|------|------|------|------|------|------|------|--------|-------|
| A2APY7- | Isoform 2 of NADH dehydrogenase [ubiquinone] 1 alpha subcomplex assembly factor 5 OS=Mus musculus GN=Ndufa5 - [NDUF5_MOUSE] | 7.05  | 2  | 1  | 1  | 2   | 0.92 | 1.14 | 1.24 | 1.02 | 1.11 | 0.97 | 1.06 | 0.93 | 1.01 | 1.17 | 1.28 | 1.03 | 1.13 | 17.51  | 5.52  |
| Q8BGU5  | Cyclin-Y OS=Mus musculus GN=Ccny PE=1 SV=1 - [CCNY_MOUSE]                                                                   | 18.77 | 4  | 5  | 5  | 12  | 0.93 | 1.05 | 1.12 | 1.16 | 1.09 | 1.02 | 0.99 | 0.93 | 1.03 | 1.02 | 1.02 | 1.12 | 1.23 | 39.37  | 7.20  |
| Q8R071  | Inositol-trisphosphate 3-kinase A OS=Mus musculus GN=Itpka PE=2 SV=1 - [IP3KA_MOUSE]                                        | 33.99 | 1  | 11 | 12 | 39  | 0.93 | 1.07 | 1.21 | 1.06 | 1.12 | 0.97 | 1.04 | 0.93 | 0.94 | 0.94 | 0.99 | 0.95 | 1.00 | 50.90  | 7.72  |
| Q6P1B1  | Xaa-Pro aminopeptidase 1 OS=Mus musculus GN=Xpnpep1 PE=2 SV=1 - [XPP1_MOUSE]                                                | 27.13 | 1  | 12 | 12 | 29  | 0.99 | 0.92 | 1.00 | 1.07 | 1.10 | 1.08 | 1.03 | 0.93 | 0.94 | 0.98 | 1.00 | 1.04 | 1.05 | 69.55  | 5.54  |
| H3BIW6  | 1-phosphatidylinositol 4,5-bisphosphate phosphodiesterase eta-2 OS=Mus musculus GN=Plech2 PE=2 SV=1 - [H3BIW6_MOUSE]        | 17.59 | 19 | 14 | 15 | 30  | 1.00 | 1.05 | 1.09 | 1.02 | 1.01 | 0.98 | 0.92 | 0.93 | 0.93 | 1.02 | 1.00 | 1.04 | 1.10 | 125.70 | 6.79  |
| P46096  | Synaptotagmin-1 OS=Mus musculus GN=Syt1 PE=1 SV=1 - [SYT1_MOUSE]                                                            | 57.48 | 1  | 15 | 28 | 412 | 0.98 | 0.95 | 1.00 | 1.01 | 1.02 | 0.94 | 0.97 | 0.93 | 0.97 | 0.94 | 0.97 | 0.95 | 0.98 | 47.39  | 8.53  |
| Q8C0E2  | Vacuolar protein sorting-associated protein 26B OS=Mus musculus GN=Vps26b PE=1 SV=1 - [VP26B_MOUSE]                         | 38.99 | 2  | 11 | 11 | 32  | 1.04 | 1.01 | 0.96 | 0.96 | 0.91 | 0.88 | 0.85 | 0.93 | 0.87 | 0.88 | 0.87 | 0.93 | 0.91 | 39.10  | 7.37  |
| Q9CPR5  | 39S ribosomal protein L15, mitochondrial OS=Mus musculus GN=Mrlp15 PE=1 SV=1 - [RM15_MOUSE]                                 | 6.44  | 2  | 2  | 2  | 3   | 0.97 | 0.85 | 0.87 | 1.09 | 1.12 | 0.92 | 0.94 | 0.93 | 0.95 | 1.01 | 1.04 | 0.94 | 0.97 | 33.52  | 10.07 |
| P70698  | CTP synthase 1 OS=Mus musculus GN=Ctps1 PE=1 SV=2 - [PYRG1_MOUSE]                                                           | 8.29  | 1  | 4  | 4  | 5   | 0.91 | 1.08 | 1.08 | 1.08 | 1.22 | 0.84 | 0.92 | 0.93 | 0.95 | 0.93 | 0.96 | 0.99 | 1.08 | 66.64  | 6.58  |
| O88962  | 7-alpha-hydroxycholesterol-4-en-3-one 12-alpha-hydroxylase OS=Mus musculus GN=Cyp8b1 PE=2 SV=1 - [CP8B1_MOUSE]              | 1.80  | 1  | 1  | 1  | 1   | 0.73 | 0.88 | 1.20 | 0.71 | 0.97 | 1.11 | 1.52 | 0.93 | 1.26 | 1.04 | 1.42 | 1.30 | 1.78 | 57.67  | 8.84  |
| Q9JMB0  | G kinase-anchoring protein 1 OS=Mus musculus GN=Gkap1 PE=1 SV=1 - [GKAP1_MOUSE]                                             | 12.02 | 1  | 4  | 4  | 6   | 0.97 | 0.92 | 0.95 | 0.90 | 1.12 | 1.02 | 1.09 | 0.93 | 0.98 | 1.15 | 1.00 | 0.88 | 1.02 | 41.74  | 8.82  |
| P12023  | Amyloid beta A4 protein OS=Mus musculus GN=App PE=1 SV=3 - [A4_MOUSE]                                                       | 32.34 | 2  | 1  | 20 | 201 | 0.91 | 0.68 | 0.75 | 0.83 | 0.91 | 0.92 | 1.00 | 0.93 | 1.02 | 0.95 | 1.04 | 0.84 | 0.92 | 86.67  | 4.79  |

|          |                                                                                                                          |       |   |   |    |    |      |      |      |      |      |      |      |      |      |      |      |      |      |        |      |
|----------|--------------------------------------------------------------------------------------------------------------------------|-------|---|---|----|----|------|------|------|------|------|------|------|------|------|------|------|------|------|--------|------|
| O70566   | Protein diaphanous homolog 2 OS=Mus musculus GN=Diaph2 PE=1 SV=2 - [DIAP2_MOUSE]                                         | 5.65  | 3 | 5 | 7  | 12 | 0.98 | 0.91 | 1.06 | 1.14 | 1.08 | 0.91 | 0.90 | 0.93 | 0.96 | 1.00 | 1.03 | 0.97 | 1.12 | 124.79 | 6.92 |
| Q8BLV3-  | Isoform 2 of Sodium/hydrogen exchanger 7 OS=Mus musculus GN=Sle9a7 - [SL9A7_MOUSE]                                       | 3.65  | 2 | 2 | 2  | 4  | 1.13 | 1.48 | 1.30 | 1.14 | 1.01 | 0.93 | 0.82 | 0.93 | 0.82 | 1.06 | 0.94 | 1.12 | 0.99 | 60.76  | 8.82 |
| Q8CHT0   | Delta-1-pyrroline-5-carboxylate dehydrogenase, mitochondrial OS=Mus musculus GN=Aldh4a1 PE=1 SV=3 - [AL4A1_MOUSE]        | 19.75 | 1 | 7 | 7  | 16 | 0.98 | 0.91 | 0.97 | 1.06 | 1.08 | 0.97 | 0.96 | 0.93 | 0.95 | 1.02 | 0.99 | 1.02 | 0.97 | 61.80  | 8.24 |
| P17439   | Glucosylceramidase OS=Mus musculus GN=Gba PE=1 SV=1 - [GLCM_MOUSE]                                                       | 2.52  | 1 | 1 | 1  | 2  | 1.11 | 1.09 | 0.99 | 1.07 | 0.96 | 0.91 | 0.82 | 0.93 | 0.84 | 0.92 | 0.83 | 0.87 | 0.79 | 57.59  | 7.75 |
| Q9D5A9   | Protein tweety homolog 1 OS=Mus musculus GN=Tyh1 PE=1 SV=1 - [TTYH1_MOUSE]                                               | 12.89 | 6 | 5 | 5  | 11 | 1.06 | 1.28 | 1.16 | 1.11 | 0.98 | 0.92 | 0.79 | 0.93 | 0.85 | 0.94 | 0.90 | 1.07 | 1.02 | 49.00  | 5.03 |
| Q923T9-3 | Isoform 3 of Calcium/calmodulin-dependent protein kinase type II subunit gamma OS=Mus musculus GN=Camk2g - [KCC2G_MOUSE] | 38.59 | 3 | 8 | 15 | 67 | 0.92 | 1.01 | 1.07 | 1.12 | 1.21 | 0.93 | 0.95 | 0.93 | 1.00 | 0.91 | 0.96 | 0.86 | 0.94 | 55.93  | 7.18 |
| Q8BWM0   | Prostaglandin E synthase 2 OS=Mus musculus GN=Ptges2 PE=1 SV=3 - [PGES2_MOUSE]                                           | 18.75 | 1 | 5 | 5  | 6  | 0.87 | 0.82 | 0.97 | 1.04 | 1.13 | 0.88 | 0.97 | 0.93 | 0.99 | 0.89 | 1.03 | 0.99 | 1.06 | 43.30  | 9.00 |
| Q99LM2   | CDK5 regulatory subunit-associated protein 3 OS=Mus musculus GN=Cdk5rap3 PE=2 SV=1 - [CK5P3_MOUSE]                       | 6.16  | 1 | 3 | 3  | 5  | 1.01 | 1.13 | 1.17 | 1.01 | 1.01 | 0.95 | 0.98 | 0.93 | 0.90 | 1.06 | 1.06 | 1.02 | 1.02 | 56.95  | 4.83 |
| E9Q1T3   | Mitogen-activated protein kinase kinase kinase OS=Mus musculus GN=Map4k5 PE=2 SV=1 - [E9Q1T3_MOUSE]                      | 3.85  | 4 | 2 | 2  | 7  | 0.96 | 1.19 | 1.25 | 1.07 | 1.20 | 0.91 | 0.92 | 0.93 | 0.99 | 0.98 | 1.04 | 1.06 | 1.03 | 87.40  | 8.07 |
| P23591   | GDP-L-fucose synthase OS=Mus musculus GN=Tsta3 PE=2 SV=3 - [FCL_MOUSE]                                                   | 14.64 | 1 | 3 | 3  | 5  | 1.07 | 1.11 | 1.03 | 1.02 | 0.95 | 1.04 | 0.97 | 0.93 | 0.86 | 0.96 | 0.89 | 1.00 | 0.94 | 35.86  | 6.74 |
| Q7TPW1   | Nexilin OS=Mus musculus GN=Nexn PE=1 SV=3 - [NEXN_MOUSE]                                                                 | 14.00 | 1 | 6 | 6  | 10 | 0.91 | 1.05 | 1.04 | 0.87 | 0.95 | 1.08 | 1.08 | 0.93 | 1.02 | 1.18 | 1.12 | 1.24 | 1.31 | 72.06  | 5.01 |
| Q9CXU4   | MCG11298 OS=Mus musculus GN=Timm23 PE=2 SV=1 - [Q9CXU4_MOUSE]                                                            | 4.78  | 2 | 1 | 1  | 2  | 1.04 | 1.12 | 1.07 | 1.25 | 1.20 | 0.72 | 0.69 | 0.93 | 0.89 | 0.95 | 0.91 | 1.04 | 1.00 | 21.89  | 8.60 |

|          |                                                                                                         |       |   |    |    |    |      |      |      |      |      |      |      |      |      |      |      |      |      |        |       |
|----------|---------------------------------------------------------------------------------------------------------|-------|---|----|----|----|------|------|------|------|------|------|------|------|------|------|------|------|------|--------|-------|
| Q8K268   | ATP-binding cassette sub-family F member 3 OS=Mus musculus GN=Abcf3 PE=1 SV=1 - [ABCF3_MOUSE]           | 5.92  | 1 | 3  | 3  | 5  | 1.01 | 1.28 | 1.27 | 1.00 | 0.99 | 0.88 | 0.86 | 0.93 | 0.92 | 0.96 | 1.02 | 1.02 | 0.90 | 79.82  | 6.16  |
| P97807-2 | Isoform Cytoplasmic of Fumarate hydratase, mitochondrial OS=Mus musculus GN=Fh - [FUMH_MOUSE]           | 67.67 | 3 | 23 | 23 | 87 | 1.00 | 0.95 | 0.98 | 1.06 | 1.03 | 0.97 | 0.98 | 0.93 | 0.93 | 0.93 | 0.94 | 0.90 | 0.94 | 50.02  | 7.94  |
| P62702   | 40S ribosomal protein S4, X isoform OS=Mus musculus GN=Rps4x PE=2 SV=2 - [RS4X_MOUSE]                   | 31.18 | 2 | 7  | 7  | 18 | 1.12 | 1.07 | 0.99 | 1.14 | 1.05 | 1.03 | 0.95 | 0.93 | 0.91 | 1.08 | 0.98 | 1.14 | 1.09 | 29.58  | 10.15 |
| Q6P5G6   | UBX domain-containing protein 7 OS=Mus musculus GN=Ubx7 PE=1 SV=2 - [UBXN7_MOUSE]                       | 18.42 | 1 | 1  | 6  | 10 | 0.94 | 0.99 | 1.05 | 0.87 | 0.93 | 0.96 | 1.02 | 0.93 | 0.98 | 0.94 | 1.00 | 1.07 | 1.14 | 52.13  | 5.03  |
| F7CBP1   | Eukaryotic translation initiation factor 4 gamma 2 OS=Mus musculus GN=Eif4g2 PE=4 SV=1 - [F7CBP1_MOUSE] | 6.11  | 4 | 5  | 5  | 19 | 0.97 | 1.16 | 1.20 | 1.09 | 1.13 | 0.92 | 0.95 | 0.93 | 0.94 | 0.98 | 1.00 | 0.94 | 1.04 | 97.83  | 6.99  |
| Q8BY89-2 | Isoform 2 of Choline transporter-like protein 2 OS=Mus musculus GN=Slc44a2 - [CTL2_MOUSE]               | 4.97  | 2 | 3  | 3  | 5  | 1.08 | 1.32 | 1.12 | 1.19 | 1.06 | 0.96 | 0.96 | 0.93 | 0.93 | 1.06 | 1.07 | 1.05 | 1.06 | 79.87  | 8.66  |
| Q9DAI2   | Rab-like protein 5 OS=Mus musculus GN=Rab5 PE=2 SV=1 - [RABL5_MOUSE]                                    | 29.73 | 1 | 4  | 4  | 6  | 0.75 | 0.80 | 1.08 | 0.72 | 1.06 | 0.94 | 1.26 | 0.93 | 1.14 | 0.84 | 0.89 | 0.79 | 1.02 | 20.82  | 5.25  |
| Q8R4X3   | RNA-binding protein 12 OS=Mus musculus GN=Rbm12 PE=1 SV=3 - [RBM12_MOUSE]                               | 5.34  | 2 | 4  | 4  | 9  | 0.92 | 0.82 | 0.76 | 0.89 | 0.90 | 0.78 | 0.78 | 0.93 | 0.93 | 0.82 | 0.94 | 0.84 | 0.93 | 102.73 | 8.32  |
| Q0VBL1   | Tigger transposable element-derived protein 2 OS=Mus musculus GN=Tigd2 PE=2 SV=1 - [TIGD2_MOUSE]        | 1.14  | 1 | 1  | 1  | 1  | 1.11 | 1.46 | 1.32 | 0.84 | 0.76 | 0.87 | 0.78 | 0.93 | 0.83 | 1.03 | 0.93 | 0.92 | 0.83 | 59.61  | 9.22  |
| O09167   | 60S ribosomal protein L21 OS=Mus musculus GN=Rpl21 PE=2 SV=3 - [RL21_MOUSE]                             | 24.38 | 4 | 3  | 3  | 6  | 0.78 | 0.78 | 0.88 | 0.99 | 1.30 | 0.92 | 1.07 | 0.93 | 0.97 | 1.06 | 1.17 | 0.92 | 1.24 | 18.55  | 10.49 |
| D3Z7E5   | Glycogen synthase kinase-3 alpha OS=Mus musculus GN=Gsk3a PE=2 SV=1 - [D3Z7E5_MOUSE]                    | 30.25 | 8 | 7  | 10 | 28 | 0.94 | 1.12 | 1.00 | 0.97 | 1.01 | 0.97 | 0.96 | 0.93 | 0.91 | 0.98 | 1.01 | 0.96 | 1.01 | 51.21  | 8.91  |

|          |                                                                                                                            |       |   |    |    |     |      |      |      |      |      |      |      |      |      |      |      |      |      |        |      |
|----------|----------------------------------------------------------------------------------------------------------------------------|-------|---|----|----|-----|------|------|------|------|------|------|------|------|------|------|------|------|------|--------|------|
| Q9D7N9   | Adipocyte plasma membrane-associated protein OS=Mus musculus GN=Apmap PE=1 SV=1 - [APMAP_MOUSE]                            | 13.73 | 1 | 5  | 5  | 10  | 0.93 | 1.23 | 1.31 | 0.98 | 1.04 | 0.82 | 0.88 | 0.93 | 1.00 | 0.90 | 0.96 | 0.90 | 0.94 | 46.40  | 6.32 |
| Q91XU3   | Phosphatidylinositol 5-phosphate 4-kinase type-2 gamma OS=Mus musculus GN=Pip4k2c PE=2 SV=1 - [PI42C_MOUSE]                | 12.35 | 1 | 5  | 5  | 13  | 0.96 | 0.85 | 0.91 | 1.01 | 1.10 | 0.96 | 0.98 | 0.93 | 0.95 | 0.85 | 0.86 | 0.99 | 0.97 | 47.31  | 6.89 |
| Q9ESX5   | H/ACA ribonucleoprotein complex subunit 4 OS=Mus musculus GN=Dkc1 PE=1 SV=4 - [DKC1_MOUSE]                                 | 11.79 | 2 | 4  | 4  | 8   | 1.01 | 1.46 | 1.67 | 1.09 | 1.04 | 1.02 | 0.95 | 0.93 | 0.95 | 0.99 | 0.94 | 1.08 | 1.00 | 57.37  | 9.28 |
| Q921G7   | Electron transfer flavoprotein-ubiquinone oxidoreductase, mitochondrial OS=Mus musculus GN=Etfidh PE=1 SV=1 - [ETFD_MOUSE] | 28.25 | 2 | 14 | 14 | 29  | 1.04 | 0.98 | 0.93 | 1.12 | 1.07 | 0.92 | 0.92 | 0.93 | 0.86 | 1.01 | 1.02 | 0.95 | 0.94 | 68.05  | 7.58 |
| Q8CDG3   | Deubiquitinating protein VCIP135 OS=Mus musculus GN=Vcpi1 PE=2 SV=1 - [VCIP1_MOUSE]                                        | 24.18 | 2 | 19 | 19 | 47  | 0.95 | 0.98 | 1.04 | 0.99 | 1.03 | 0.97 | 1.02 | 0.93 | 0.99 | 0.95 | 1.01 | 0.97 | 1.00 | 134.42 | 7.17 |
| Q9D8B7   | Junctional adhesion molecule C OS=Mus musculus GN=Jam3 PE=1 SV=2 - [JAM3_MOUSE]                                            | 21.94 | 2 | 7  | 7  | 19  | 0.99 | 1.24 | 1.24 | 1.01 | 1.05 | 0.92 | 0.96 | 0.93 | 0.92 | 0.95 | 0.93 | 1.01 | 1.01 | 34.82  | 7.03 |
| D3Z497   | Uncharacterized protein OS=Mus musculus GN=Gm7075 PE=4 SV=1 - [D3Z497_MOUSE]                                               | 18.75 | 2 | 2  | 2  | 2   | 1.02 | 0.80 | 0.77 | 0.89 | 0.86 | 1.02 | 0.99 | 0.93 | 0.90 | 0.89 | 0.87 | 0.77 | 0.75 | 12.64  | 6.70 |
| Q8C079-3 | Isoform 3 of Striatin-interacting protein 1 OS=Mus musculus GN=Strip1 - [STRP1_MOUSE]                                      | 13.78 | 4 | 7  | 8  | 16  | 0.96 | 1.03 | 1.14 | 1.11 | 1.16 | 0.92 | 0.95 | 0.93 | 0.92 | 1.08 | 1.12 | 1.07 | 1.07 | 86.83  | 5.66 |
| Q9CQ62   | 2,4-dienoyl-CoA reductase, mitochondrial OS=Mus musculus GN=Decr1 PE=1 SV=1 - [DECR_MOUSE]                                 | 14.63 | 1 | 4  | 4  | 12  | 1.14 | 0.84 | 0.88 | 1.01 | 0.91 | 0.87 | 0.80 | 0.93 | 0.93 | 0.99 | 1.01 | 1.15 | 1.07 | 36.19  | 8.95 |
| F7D0T8   | RING finger protein 157 (Fragment) OS=Mus musculus GN=Rnf157 PE=4 SV=1 - [F7D0T8_MOUSE]                                    | 1.98  | 5 | 1  | 1  | 3   | 0.86 | 0.81 | 0.94 | 0.89 | 1.03 | 0.97 | 1.12 | 0.93 | 1.07 | 0.88 | 1.03 | 0.97 | 1.13 | 54.80  | 4.61 |
| Q91VD9   | NADH-ubiquinone oxidoreductase 75 kDa subunit, mitochondrial OS=Mus musculus GN=Ndufs1 PE=1 SV=2 - [NDUS1_MOUSE]           | 59.56 | 1 | 33 | 33 | 151 | 0.94 | 0.96 | 1.00 | 1.00 | 1.05 | 0.92 | 0.98 | 0.93 | 0.97 | 0.93 | 0.96 | 0.97 | 1.07 | 79.73  | 5.72 |

|          |                                                                                                                                                   |       |   |    |    |     |      |      |      |      |      |      |      |      |      |      |      |      |      |        |      |
|----------|---------------------------------------------------------------------------------------------------------------------------------------------------|-------|---|----|----|-----|------|------|------|------|------|------|------|------|------|------|------|------|------|--------|------|
| Q8K596   | Protein Slc8a2<br>OS=Mus musculus<br>GN=Slc8a2 PE=2<br>SV=1 -<br>[Q8K596_MOUSE]                                                                   | 37.02 | 5 | 28 | 29 | 160 | 0.97 | 1.08 | 1.10 | 1.08 | 1.10 | 0.91 | 0.91 | 0.93 | 0.97 | 0.94 | 0.97 | 1.03 | 1.03 | 100.65 | 5.12 |
| A2ACM0   | Regulatory-associated<br>protein of mTOR<br>OS=Mus musculus<br>GN=Rptor PE=4 SV=1<br>- [A2ACM0_MOUSE]                                             | 0.67  | 2 | 1  | 1  | 1   | 1.07 | 1.07 | 1.00 | 1.00 | 0.93 | 0.86 | 0.79 | 0.93 | 0.86 | 0.96 | 0.89 | 1.04 | 0.97 | 149.40 | 6.87 |
| B1AXZ0   | ELAV-like protein 2<br>OS=Mus musculus<br>GN=Elavl2 PE=2<br>SV=1 -<br>[B1AXZ0_MOUSE]                                                              | 40.75 | 9 | 5  | 11 | 26  | 0.99 | 1.04 | 0.98 | 0.90 | 0.91 | 0.88 | 0.86 | 0.93 | 0.87 | 0.83 | 0.82 | 0.92 | 0.87 | 37.98  | 9.04 |
| P63082   | V-type proton ATPase<br>16 kDa proteolipid<br>subunit OS=Mus<br>musculus GN=Atp6v0c<br>PE=2 SV=1 -<br>[VATL_MOUSE]                                | 54.84 | 3 | 3  | 3  | 5   | 0.99 | 0.89 | 0.90 | 1.12 | 1.13 | 0.88 | 0.88 | 0.93 | 0.94 | 0.94 | 0.95 | 0.99 | 1.00 | 15.80  | 9.13 |
| A8DUK4   | Beta-globin OS=Mus<br>musculus GN=Hbb-b1<br>PE=2 SV=1 -<br>[A8DUK4_MOUSE]                                                                         | 89.80 | 5 | 14 | 14 | 188 | 0.84 | 1.01 | 1.18 | 0.54 | 0.65 | 0.83 | 0.96 | 0.93 | 1.14 | 1.14 | 1.30 | 0.70 | 0.83 | 15.74  | 7.69 |
| Q5XJF6   | Ribosomal protein<br>OS=Mus musculus<br>GN=Rpl10a PE=2<br>SV=1 -<br>[Q5XJF6_MOUSE]                                                                | 26.73 | 4 | 6  | 6  | 25  | 0.95 | 0.89 | 0.92 | 1.06 | 1.12 | 0.91 | 1.01 | 0.93 | 1.03 | 0.96 | 1.06 | 1.01 | 1.06 | 24.82  | 9.94 |
| Q8K2P7-2 | Isoform 2 of Sodium-<br>coupled neutral amino<br>acid transporter 1<br>OS=Mus musculus<br>GN=Slc38a1 -<br>[S38A1_MOUSE]                           | 3.20  | 2 | 1  | 1  | 2   | 1.35 | 0.76 | 0.56 | 0.97 | 0.72 | 1.18 | 0.87 | 0.93 | 0.69 | 0.95 | 0.70 | 1.26 | 0.93 | 38.09  | 6.33 |
| Q9CPV4   | Glyoxalase domain-<br>containing protein 4<br>OS=Mus musculus<br>GN=Glod4 PE=2<br>SV=1 -<br>[GLOD4_MOUSE]                                         | 78.86 | 8 | 19 | 19 | 84  | 1.00 | 0.99 | 0.95 | 1.01 | 1.00 | 0.96 | 0.95 | 0.93 | 0.91 | 0.95 | 0.94 | 0.95 | 0.94 | 33.30  | 5.47 |
| Q8VD73   | Potassium voltage-<br>gated channel, shaker-<br>related subfamily, beta<br>member 3 OS=Mus<br>musculus GN=Kcnab3<br>PE=2 SV=1 -<br>[Q8VD73_MOUSE] | 11.14 | 2 | 3  | 3  | 5   | 0.79 | 0.98 | 1.20 | 0.98 | 1.24 | 0.83 | 0.92 | 0.93 | 1.12 | 0.92 | 1.17 | 0.84 | 1.03 | 43.75  | 8.54 |
| O54984   | ATPase Asna1<br>OS=Mus musculus<br>GN=Asna1 PE=1<br>SV=2 -<br>[ASNA_MOUSE]                                                                        | 27.87 | 1 | 7  | 7  | 17  | 1.00 | 0.75 | 0.77 | 0.98 | 0.94 | 0.94 | 0.91 | 0.93 | 0.86 | 0.92 | 0.92 | 0.86 | 0.85 | 38.80  | 4.91 |
| Q8C078   | Calcium/calmodulin-<br>dependent protein<br>kinase kinase 2<br>OS=Mus musculus<br>GN=Camkk2 PE=1<br>SV=2 -<br>[KKCC2_MOUSE]                       | 45.75 | 4 | 3  | 17 | 56  | 0.83 | 0.99 | 1.14 | 0.96 | 1.12 | 0.94 | 1.14 | 0.93 | 1.07 | 0.84 | 0.95 | 0.87 | 1.00 | 64.58  | 5.90 |

|        |                                                                                                                             |       |   |    |    |    |      |      |      |      |      |      |      |      |      |      |      |      |      |        |      |
|--------|-----------------------------------------------------------------------------------------------------------------------------|-------|---|----|----|----|------|------|------|------|------|------|------|------|------|------|------|------|------|--------|------|
| Q8BG92 | Clavesin-2 OS=Mus musculus GN=Civs2 PE=2 SV=1 - [CLVS2_MOUSE]                                                               | 19.27 | 2 | 3  | 5  | 9  | 0.88 | 1.08 | 1.32 | 1.06 | 1.26 | 0.96 | 0.96 | 0.93 | 0.96 | 0.89 | 0.90 | 1.00 | 1.01 | 37.93  | 6.20 |
| Q61655 | ATP-dependent RNA helicase DDX19A OS=Mus musculus GN=Ddx19a PE=2 SV=2 - [DD19A_MOUSE]                                       | 21.97 | 5 | 8  | 8  | 18 | 1.00 | 0.92 | 0.97 | 0.98 | 1.02 | 0.92 | 0.92 | 0.93 | 0.95 | 0.96 | 0.99 | 0.96 | 1.11 | 53.90  | 6.67 |
| Q6DFW4 | Nucleolar protein 58 OS=Mus musculus GN=Nop58 PE=1 SV=1 - [NOP58_MOUSE]                                                     | 7.28  | 1 | 3  | 3  | 5  | 1.04 | 1.00 | 0.90 | 1.14 | 1.09 | 1.01 | 0.96 | 0.93 | 0.89 | 1.00 | 0.96 | 0.94 | 0.90 | 60.30  | 8.34 |
| Q8BWF0 | Succinate-semialdehyde dehydrogenase, mitochondrial OS=Mus musculus GN=Aldh5a1 PE=1 SV=1 - [SSDH_MOUSE]                     | 51.24 | 1 | 21 | 21 | 61 | 1.04 | 0.98 | 1.05 | 1.05 | 1.09 | 0.98 | 0.94 | 0.93 | 0.94 | 1.01 | 0.99 | 0.99 | 0.99 | 55.93  | 8.25 |
| Q8BXA0 | Leucine-rich repeat and fibronectin type-III domain-containing protein 5 OS=Mus musculus GN=Lrfn5 PE=1 SV=1 - [LRFN5_MOUSE] | 7.23  | 2 | 3  | 3  | 5  | 0.99 | 1.03 | 1.11 | 1.05 | 1.16 | 0.84 | 0.84 | 0.93 | 1.18 | 1.05 | 1.04 | 0.95 | 0.97 | 79.32  | 7.24 |
| Q9JJ28 | Protein flightless-1 homolog OS=Mus musculus GN=Flil PE=1 SV=1 - [FLIL_MOUSE]                                               | 4.25  | 1 | 4  | 4  | 9  | 0.97 | 1.09 | 1.06 | 1.01 | 1.08 | 0.91 | 0.94 | 0.93 | 0.97 | 0.98 | 1.04 | 1.04 | 1.02 | 144.71 | 6.06 |
| Q8C015 | Serine/threonine-protein kinase PAK 7 OS=Mus musculus GN=Pak7 PE=1 SV=1 - [PAK7_MOUSE]                                      | 21.14 | 2 | 10 | 12 | 25 | 0.88 | 1.06 | 1.28 | 1.03 | 1.11 | 1.01 | 1.12 | 0.93 | 1.11 | 0.90 | 1.03 | 0.88 | 0.98 | 80.90  | 8.21 |
| Q8BG94 | COMM domain-containing protein 7 OS=Mus musculus GN=Comm7 PE=2 SV=1 - [COMD7_MOUSE]                                         | 26.00 | 2 | 5  | 5  | 9  | 0.96 | 0.96 | 0.89 | 0.95 | 1.01 | 0.99 | 1.01 | 0.93 | 0.93 | 0.94 | 0.98 | 1.05 | 1.00 | 22.64  | 5.94 |
| E9QNN1 | ATP-dependent RNA helicase A OS=Mus musculus GN=Dhx9 PE=2 SV=1 - [E9QNN1_MOUSE]                                             | 20.81 | 4 | 20 | 20 | 61 | 1.04 | 1.04 | 1.09 | 1.07 | 1.05 | 0.98 | 0.99 | 0.93 | 0.94 | 0.98 | 0.97 | 1.06 | 1.11 | 149.60 | 6.83 |
| Q91VR5 | ATP-dependent RNA helicase DDX1 OS=Mus musculus GN=Ddx1 PE=1 SV=1 - [DDX1_MOUSE]                                            | 30.27 | 1 | 17 | 17 | 31 | 0.92 | 0.87 | 0.95 | 0.96 | 1.03 | 0.96 | 1.00 | 0.93 | 1.02 | 0.92 | 0.98 | 0.93 | 1.00 | 82.45  | 7.21 |
| E9PVA8 | Protein Gcn111 OS=Mus musculus GN=Gcn111 PE=2 SV=1 - [E9PVA8_MOUSE]                                                         | 4.04  | 2 | 8  | 8  | 12 | 0.90 | 0.98 | 1.02 | 1.01 | 1.19 | 0.91 | 1.00 | 0.93 | 0.98 | 1.00 | 1.11 | 1.01 | 1.13 | 292.83 | 7.36 |
| F8WGT1 | Adenosylhomocysteina se OS=Mus musculus GN=Ahcy12 PE=2 SV=1 - [F8WGT1_MOUSE]                                                | 30.23 | 9 | 2  | 21 | 82 | 0.96 | 0.96 | 1.69 | 1.00 | 1.05 | 1.01 | 1.05 | 0.93 | 0.98 | 1.04 | 1.09 | 0.83 | 0.87 | 66.73  | 7.36 |

|        |                                                                                                                    |       |   |    |    |     |      |      |      |      |      |      |      |      |      |      |      |      |      |        |       |
|--------|--------------------------------------------------------------------------------------------------------------------|-------|---|----|----|-----|------|------|------|------|------|------|------|------|------|------|------|------|------|--------|-------|
| P62281 | 40S ribosomal protein S11 OS=Mus musculus GN=Rps11 PE=2 SV=3 - [RS11_MOUSE]                                        | 27.85 | 1 | 6  | 6  | 15  | 0.96 | 1.12 | 1.15 | 1.05 | 1.11 | 0.95 | 1.00 | 0.93 | 1.01 | 0.98 | 1.03 | 0.98 | 1.10 | 18.42  | 10.30 |
| Q9D186 | Apolipoprotein O OS=Mus musculus GN=ApoO PE=2 SV=1 - [Q9D186_MOUSE]                                                | 31.71 | 3 | 4  | 4  | 16  | 1.08 | 1.12 | 1.00 | 1.08 | 0.99 | 0.96 | 0.90 | 0.93 | 0.89 | 1.03 | 0.92 | 0.97 | 0.94 | 18.79  | 8.37  |
| Q922B1 | O-acetyl-ADP-ribose deacetylase MACROD1 OS=Mus musculus GN=Macrod1 PE=2 SV=2 - [MACD1_MOUSE]                       | 20.74 | 1 | 5  | 5  | 11  | 0.86 | 0.89 | 1.05 | 0.92 | 1.04 | 0.92 | 1.02 | 0.93 | 1.05 | 0.89 | 0.99 | 0.97 | 0.92 | 35.27  | 8.85  |
| O54750 | Cytochrome P450 2J6 OS=Mus musculus GN=Cyp2j6 PE=2 SV=2 - [CP2J6_MOUSE]                                            | 3.79  | 9 | 2  | 2  | 4   | 1.02 | 1.17 | 1.15 | 1.01 | 0.99 | 0.87 | 0.85 | 0.93 | 0.91 | 0.98 | 0.96 | 1.12 | 1.10 | 57.75  | 8.44  |
| Q9JLN9 | Serine/threonine-protein kinase mTOR OS=Mus musculus GN=Mtor PE=1 SV=2 - [MTOR_MOUSE]                              | 9.65  | 2 | 17 | 17 | 35  | 1.01 | 1.20 | 1.13 | 1.13 | 1.13 | 0.91 | 0.92 | 0.93 | 0.88 | 0.99 | 1.00 | 1.02 | 1.03 | 288.60 | 7.17  |
| Q9JJV2 | Profilin-2 OS=Mus musculus GN=Pfn2 PE=1 SV=3 - [PROF2_MOUSE]                                                       | 55.71 | 4 | 7  | 7  | 106 | 0.89 | 0.96 | 1.11 | 1.01 | 1.11 | 0.90 | 0.97 | 0.93 | 0.97 | 0.92 | 1.00 | 0.93 | 1.07 | 15.02  | 6.99  |
| Q9Z1B3 | 1-phosphatidylinositol 4,5-bisphosphate phosphodiesterase beta-1 OS=Mus musculus GN=Pcb1 PE=1 SV=2 - [PLCB1_MOUSE] | 59.46 | 9 | 60 | 60 | 238 | 0.97 | 1.01 | 1.01 | 1.04 | 1.08 | 0.98 | 1.02 | 0.93 | 0.93 | 0.95 | 0.98 | 0.93 | 0.97 | 138.31 | 6.13  |
| Q91V64 | Isochorismatase domain-containing protein 1 OS=Mus musculus GN=Isoc1 PE=2 SV=1 - [ISOC1_MOUSE]                     | 13.47 | 1 | 3  | 3  | 5   | 1.12 | 1.14 | 1.03 | 1.19 | 1.07 | 1.04 | 0.94 | 0.93 | 0.84 | 1.16 | 1.04 | 1.22 | 1.10 | 32.01  | 7.39  |
| Q3UEB3 | Isoform 3 of Poly(U)-binding-splicing factor PUF60 OS=Mus musculus GN=Puff60 - [PUF60_MOUSE]                       | 26.85 | 3 | 10 | 10 | 21  | 0.96 | 1.10 | 1.20 | 0.99 | 1.00 | 0.96 | 0.97 | 0.93 | 0.93 | 0.99 | 1.01 | 0.90 | 0.97 | 53.99  | 5.33  |
| Q5TKT4 | Transcription activator BRG1 OS=Mus musculus GN=Smarca4 PE=1 SV=1 - [SMCA4_MOUSE]                                  | 6.94  | 4 | 4  | 10 | 16  | 0.97 | 1.01 | 1.09 | 0.94 | 1.09 | 0.92 | 1.00 | 0.93 | 1.04 | 0.94 | 1.00 | 1.09 | 1.11 | 181.31 | 8.00  |
| Q3UHD6 | Isoform 2 of Sorting nexin-27 OS=Mus musculus GN=Snx27 - [SNX27_MOUSE]                                             | 25.48 | 5 | 9  | 9  | 30  | 1.08 | 1.00 | 0.84 | 1.15 | 1.06 | 0.87 | 0.80 | 0.93 | 0.83 | 0.96 | 0.94 | 0.93 | 0.89 | 59.50  | 6.24  |
| Q9EPU0 | Isoform 2 of Regulator of nonsense transcripts 1 OS=Mus musculus GN=Upf1 - [RENT1_MOUSE]                           | 23.99 | 2 | 19 | 19 | 37  | 1.02 | 1.02 | 0.98 | 1.05 | 0.98 | 0.97 | 0.97 | 0.93 | 0.94 | 0.95 | 0.98 | 0.94 | 0.96 | 122.58 | 6.68  |

|          |                                                                                                                                   |       |   |    |    |    |      |      |      |      |      |      |      |      |      |      |      |      |      |        |      |
|----------|-----------------------------------------------------------------------------------------------------------------------------------|-------|---|----|----|----|------|------|------|------|------|------|------|------|------|------|------|------|------|--------|------|
| Q9CRA5   | Golgi phosphoprotein 3<br>OS=Mus musculus<br>GN=Golph3 PE=2<br>SV=1 -<br>[GOLP3_MOUSE]                                            | 4.36  | 1 | 1  | 1  | 3  | 0.98 | 0.85 | 0.87 | 1.12 | 1.15 | 1.02 | 1.04 | 0.93 | 0.95 | 1.11 | 1.13 | 0.87 | 0.89 | 33.73  | 6.44 |
| D3Z074   | Protein diaphanous<br>homolog 1 OS=Mus<br>musculus GN=Diap1<br>PE=2 SV=2 -<br>[D3Z074_MOUSE]                                      | 3.69  | 5 | 4  | 4  | 7  | 0.97 | 0.96 | 0.92 | 1.08 | 1.04 | 0.95 | 1.00 | 0.93 | 0.94 | 1.01 | 1.04 | 0.99 | 1.01 | 135.74 | 5.34 |
| Q8C129   | Leucyl-cystinyl<br>aminopeptidase<br>OS=Mus musculus<br>GN=Lnpep PE=1<br>SV=1 -<br>[LCAP_MOUSE]                                   | 6.83  | 1 | 5  | 5  | 22 | 0.92 | 1.07 | 1.10 | 0.89 | 0.99 | 0.95 | 1.00 | 0.93 | 1.03 | 0.94 | 0.98 | 0.97 | 0.89 | 117.23 | 5.96 |
| Q8QZS1   | 3-hydroxyisobutyryl-<br>CoA hydrolase,<br>mitochondrial OS=Mus<br>musculus GN=Hibch<br>PE=1 SV=1 -<br>[HIBCH_MOUSE]               | 33.25 | 2 | 11 | 11 | 26 | 1.07 | 0.97 | 0.90 | 1.15 | 1.08 | 1.03 | 0.96 | 0.93 | 0.82 | 1.03 | 1.03 | 1.05 | 1.06 | 43.01  | 8.06 |
| D3YVS7   | Uncharacterized<br>protein (Fragment)<br>OS=Mus musculus<br>GN=Cystm1 PE=2<br>SV=1 -<br>[D3YVS7_MOUSE]                            | 11.90 | 2 | 1  | 1  | 2  | 1.10 | 0.98 | 0.88 | 0.95 | 0.86 | 0.98 | 0.89 | 0.93 | 0.84 | 1.03 | 0.93 | 1.04 | 0.95 | 9.16   | 4.44 |
| Q9EQH3   | Vacuolar protein<br>sorting-associated<br>protein 35 OS=Mus<br>musculus GN=Vps35<br>PE=1 SV=1 -<br>[VPS35_MOUSE]                  | 26.63 | 1 | 20 | 20 | 32 | 1.14 | 1.11 | 0.92 | 1.14 | 0.94 | 0.91 | 0.76 | 0.93 | 0.77 | 0.98 | 0.86 | 1.10 | 1.01 | 91.65  | 5.44 |
| Q8C754   | Vacuolar protein<br>sorting-associated<br>protein 52 homolog<br>OS=Mus musculus<br>GN=Vps52 PE=2<br>SV=1 -<br>[VPS52_MOUSE]       | 17.98 | 3 | 8  | 8  | 12 | 1.04 | 1.16 | 0.99 | 1.22 | 1.18 | 0.97 | 0.91 | 0.93 | 0.93 | 0.85 | 0.94 | 1.08 | 1.14 | 81.99  | 5.90 |
| Q60634-3 | Isoform 3 of Flotillin-2<br>OS=Mus musculus<br>GN=Flot2 -<br>[FLOT2_MOUSE]                                                        | 48.28 | 4 | 16 | 16 | 37 | 1.00 | 1.12 | 1.12 | 1.10 | 1.07 | 0.91 | 0.91 | 0.93 | 0.93 | 1.04 | 1.04 | 1.06 | 1.11 | 41.63  | 5.22 |
| Q7TNR6   | Immunoglobulin<br>superfamily member 21<br>OS=Mus musculus<br>GN=Igsf21 PE=2<br>SV=1 -<br>[IGS21_MOUSE]                           | 19.02 | 1 | 7  | 7  | 20 | 1.10 | 0.97 | 0.86 | 0.95 | 0.89 | 0.94 | 0.94 | 0.93 | 0.92 | 0.91 | 0.84 | 1.00 | 0.93 | 51.90  | 6.95 |
| Q9CXR1   | Dehydrogenase/reducta<br>se SDR family member<br>7 OS=Mus musculus<br>GN=Dhrs7 PE=2<br>SV=2 -<br>[DHRS7_MOUSE]                    | 2.96  | 1 | 1  | 1  | 1  | 0.92 | 1.16 | 1.26 | 1.24 | 1.34 | 0.88 | 0.95 | 0.93 | 1.00 | 1.01 | 1.10 | 1.02 | 1.10 | 38.14  | 8.32 |
| D3Z614   | Crystallin, zeta<br>(Quinone reductase)-<br>like 1, isoform CRA_h<br>OS=Mus musculus<br>GN=Cryz1 PE=4<br>SV=1 -<br>[D3Z614_MOUSE] | 10.51 | 6 | 3  | 3  | 5  | 1.01 | 0.95 | 0.91 | 1.08 | 1.07 | 0.95 | 0.95 | 0.93 | 0.90 | 1.02 | 0.99 | 1.04 | 1.01 | 36.98  | 6.09 |



|          |                                                                                                                                                  |       |   |    |    |     |      |      |      |      |      |      |      |      |      |      |      |      |      |        |      |
|----------|--------------------------------------------------------------------------------------------------------------------------------------------------|-------|---|----|----|-----|------|------|------|------|------|------|------|------|------|------|------|------|------|--------|------|
| Q7TSQ8   | Pyruvate dehydrogenase phosphatase regulatory subunit, mitochondrial OS=Mus musculus GN=Pdpr PE=2 SV=1 - [PDPR_MOUSE]                            | 11.16 | 2 | 8  | 8  | 16  | 1.07 | 0.94 | 0.96 | 1.06 | 1.05 | 0.98 | 0.92 | 0.93 | 0.90 | 0.98 | 0.93 | 0.95 | 0.97 | 99.17  | 6.35 |
| E0CXA9   | MOB-like protein phocein OS=Mus musculus GN=Mob4 PE=2 SV=1 - [E0CXA9_MOUSE]                                                                      | 35.78 | 4 | 5  | 5  | 8   | 1.01 | 1.06 | 1.01 | 1.06 | 0.98 | 0.88 | 0.88 | 0.93 | 0.89 | 0.86 | 0.85 | 0.95 | 0.97 | 23.50  | 6.92 |
| Q9Z1K6   | E3 ubiquitin-protein ligase ARIH2 OS=Mus musculus GN=Arih2 PE=2 SV=1 - [ARI2_MOUSE]                                                              | 3.25  | 1 | 1  | 1  | 1   | 1.07 | 0.97 | 0.90 | 1.27 | 1.18 | 1.15 | 1.06 | 0.93 | 0.87 | 1.01 | 0.95 | 0.93 | 0.87 | 57.66  | 5.69 |
| O55242-2 | Isoform 2 of Sigma non-opioid intracellular receptor 1 OS=Mus musculus GN=Sigmar1 - [SGMR1_MOUSE]                                                | 4.17  | 2 | 1  | 1  | 2   | 0.98 | 1.19 | 1.21 | 1.11 | 1.14 | 1.06 | 1.08 | 0.93 | 0.95 | 0.95 | 0.97 | 1.03 | 1.05 | 21.62  | 5.94 |
| Q8QZY9   | Splicing factor 3B subunit 4 OS=Mus musculus GN=SF3b4 PE=2 SV=1 - [SF3B4_MOUSE]                                                                  | 19.10 | 1 | 4  | 4  | 15  | 0.90 | 0.90 | 1.01 | 0.84 | 0.92 | 1.01 | 1.13 | 0.93 | 1.09 | 0.86 | 0.97 | 0.94 | 1.00 | 44.33  | 8.56 |
| Q922F4   | Tubulin beta-6 chain OS=Mus musculus GN=Tubb6 PE=1 SV=1 - [TBB6_MOUSE]                                                                           | 38.93 | 1 | 2  | 17 | 652 | 0.94 | 1.00 | 0.97 | 1.05 | 1.08 | 1.06 | 1.03 | 0.93 | 1.10 | 0.93 | 0.90 | 1.12 | 1.04 | 50.06  | 4.89 |
| Q69ZK9   | Neuroigin-2 OS=Mus musculus GN=Nlgn2 PE=1 SV=2 - [NLGN2_MOUSE]                                                                                   | 21.17 | 2 | 11 | 14 | 38  | 1.01 | 0.96 | 0.92 | 1.04 | 1.04 | 0.89 | 0.84 | 0.93 | 0.89 | 0.94 | 0.95 | 0.95 | 0.94 | 90.93  | 6.18 |
| Q8C2E7   | WASH complex subunit strumpellin OS=Mus musculus GN=Kiaa0196 PE=2 SV=2 - [STRUM_MOUSE]                                                           | 5.18  | 2 | 5  | 5  | 7   | 1.03 | 1.15 | 1.24 | 1.05 | 1.14 | 0.98 | 1.09 | 0.93 | 1.03 | 0.95 | 1.04 | 1.07 | 1.17 | 134.02 | 7.12 |
| Q6KAR6   | Exocyst complex component 3 OS=Mus musculus GN=Exoc3 PE=1 SV=2 - [EXOC3_MOUSE]                                                                   | 15.63 | 1 | 9  | 10 | 16  | 0.98 | 1.05 | 1.15 | 1.10 | 1.10 | 0.92 | 0.92 | 0.93 | 0.88 | 0.91 | 0.96 | 0.97 | 0.99 | 86.40  | 6.20 |
| Q99N15   | 17beta-hydroxysteroid dehydrogenase type 10/short chain L-3-hydroxyacyl-CoA dehydrogenase OS=Mus musculus GN=Hsd17b10 PE=2 SV=1 - [Q99N15_MOUSE] | 56.70 | 3 | 11 | 11 | 42  | 1.01 | 1.05 | 1.02 | 1.11 | 1.13 | 0.93 | 0.93 | 0.93 | 0.92 | 1.01 | 0.98 | 0.99 | 1.01 | 27.26  | 8.76 |
| P62196   | 26S protease regulatory subunit 8 OS=Mus musculus GN=Psmc5 PE=1 SV=1 - [PRS8_MOUSE]                                                              | 45.07 | 2 | 14 | 15 | 37  | 1.04 | 0.95 | 0.94 | 1.08 | 1.03 | 0.94 | 0.91 | 0.93 | 0.90 | 0.98 | 0.91 | 0.94 | 0.97 | 45.60  | 7.55 |

|          |                                                                                                                     |       |    |    |    |    |      |      |      |      |      |      |      |      |      |      |      |      |      |        |      |
|----------|---------------------------------------------------------------------------------------------------------------------|-------|----|----|----|----|------|------|------|------|------|------|------|------|------|------|------|------|------|--------|------|
| Q03137   | Ephrin type-A receptor 4 OS=Mus musculus GN=Epha4 PE=1 SV=2 - [EPHA4_MOUSE]                                         | 22.11 | 6  | 13 | 15 | 45 | 0.97 | 1.14 | 1.10 | 1.12 | 1.21 | 0.89 | 0.94 | 0.93 | 0.98 | 0.97 | 1.00 | 0.97 | 0.97 | 109.74 | 6.51 |
| Q8BL99-5 | Isoform 5 of Protein dopey-1 OS=Mus musculus GN=Dopey1 - [DOP1_MOUSE]                                               | 0.42  | 4  | 1  | 1  | 2  | 1.16 | 1.40 | 1.20 | 1.00 | 0.86 | 0.95 | 0.81 | 0.93 | 0.80 | 0.99 | 0.86 | 1.31 | 1.13 | 268.12 | 6.21 |
| Q8K3C3   | Protein LZIC OS=Mus musculus GN=Lzic PE=1 SV=1 - [LZIC_MOUSE]                                                       | 30.53 | 2  | 2  | 5  | 14 | 0.99 | 0.66 | 0.80 | 0.98 | 0.91 | 0.94 | 1.01 | 0.93 | 0.87 | 0.87 | 0.88 | 0.81 | 0.87 | 21.52  | 4.96 |
| D3YVM8   | Biogenesis of lysosome-related organelles complex 1 subunit 1 OS=Mus musculus GN=Bloc1s1 PE=2 SV=1 - [D3YVM8_MOUSE] | 8.26  | 2  | 1  | 1  | 2  | 1.02 | 0.98 | 0.96 | 0.98 | 0.97 | 0.95 | 0.93 | 0.93 | 0.91 | 0.96 | 0.94 | 0.92 | 0.90 | 13.89  | 6.79 |
| Q9CWB7   | Glutaredoxin-like protein C5orf63 homolog OS=Mus musculus PE=1 SV=1 - [YD286_MOUSE]                                 | 33.91 | 1  | 3  | 3  | 5  | 1.45 | 0.83 | 0.63 | 0.94 | 0.66 | 1.00 | 0.65 | 0.93 | 0.70 | 0.84 | 0.58 | 0.97 | 0.76 | 13.42  | 9.13 |
| Q8OU28-3 | Isoform 3 of MAP kinase-activating death domain protein OS=Mus musculus GN=Madd - [MADD_MOUSE]                      | 14.83 | 28 | 17 | 17 | 34 | 0.96 | 1.11 | 1.17 | 1.13 | 1.20 | 0.93 | 0.94 | 0.93 | 0.99 | 0.99 | 1.04 | 1.08 | 1.15 | 173.17 | 6.16 |
| Q9Z0N1   | Eukaryotic translation initiation factor 2 subunit 3, X-linked OS=Mus musculus GN=Eir2s3x PE=1 SV=2 - [IF2G_MOUSE]  | 13.77 | 3  | 5  | 5  | 12 | 1.08 | 0.90 | 0.90 | 1.06 | 0.95 | 0.90 | 0.80 | 0.93 | 0.90 | 0.86 | 0.84 | 0.92 | 0.86 | 51.03  | 8.40 |
| Q8C996   | Transmembrane protein 163 OS=Mus musculus GN=Tmem163 PE=1 SV=1 - [TM163_MOUSE]                                      | 4.86  | 1  | 1  | 1  | 33 | 1.02 | 1.28 | 1.17 | 1.09 | 1.05 | 0.91 | 0.82 | 0.93 | 0.91 | 0.97 | 0.98 | 0.95 | 0.90 | 31.17  | 7.93 |
| Q6PEE3   | Ribonucleoside-diphosphate reductase subunit M2 B OS=Mus musculus GN=Rrm2b PE=1 SV=1 - [RIR2B_MOUSE]                | 7.12  | 4  | 2  | 2  | 4  | 0.92 | 1.10 | 1.18 | 1.02 | 1.10 | 0.93 | 1.01 | 0.93 | 1.01 | 0.93 | 1.01 | 0.95 | 1.03 | 40.78  | 5.01 |
| Q3TXX4   | Vesicular glutamate transporter 1 OS=Mus musculus GN=Slc17a7 PE=2 SV=2 - [VGLU1_MOUSE]                              | 15.89 | 1  | 8  | 8  | 84 | 1.02 | 1.02 | 1.03 | 1.10 | 1.01 | 0.93 | 0.87 | 0.93 | 0.90 | 0.91 | 0.89 | 0.99 | 0.92 | 61.60  | 7.34 |
| Q8BQU3   | Protein ACN9 homolog, mitochondrial OS=Mus musculus GN=Acn9 PE=2 SV=1 - [ACN9_MOUSE]                                | 20.80 | 1  | 3  | 3  | 4  | 1.06 | 0.84 | 0.88 | 0.89 | 0.80 | 0.88 | 0.83 | 0.93 | 0.88 | 0.73 | 0.74 | 0.82 | 0.86 | 14.46  | 9.07 |
| P97490   | Adenylate cyclase type 8 OS=Mus musculus GN=Adcy8 PE=2 SV=2 - [ADCY8_MOUSE]                                         | 0.64  | 1  | 1  | 1  | 1  | 0.95 | 1.04 | 1.09 | 1.06 | 1.12 | 0.86 | 0.90 | 0.93 | 0.98 | 0.96 | 1.02 | 1.06 | 1.12 | 140.01 | 6.93 |

|        |                                                                                                                |       |   |    |    |     |      |      |      |      |      |      |      |      |      |      |      |      |      |        |      |
|--------|----------------------------------------------------------------------------------------------------------------|-------|---|----|----|-----|------|------|------|------|------|------|------|------|------|------|------|------|------|--------|------|
| Q8CCK0 | Core histone macro-H2A.2 OS=Mus musculus GN=H2afy2 PE=1 SV=3 - [H2AW_MOUSE]                                    | 19.89 | 1 | 5  | 7  | 23  | 1.01 | 1.08 | 1.14 | 1.08 | 1.07 | 1.00 | 1.03 | 0.93 | 0.90 | 1.02 | 1.00 | 1.04 | 1.05 | 40.07  | 9.69 |
| Q6ZWX6 | Eukaryotic translation initiation factor 2 subunit 1 OS=Mus musculus GN=Eif2s1 PE=1 SV=3 - [IF2A_MOUSE]        | 33.02 | 1 | 9  | 9  | 19  | 1.04 | 1.14 | 1.11 | 1.05 | 0.99 | 0.98 | 0.96 | 0.93 | 0.96 | 0.98 | 0.97 | 0.98 | 0.97 | 36.09  | 5.08 |
| B8JK39 | Protein Itga9 OS=Mus musculus GN=Itga9 PE=2 SV=1 - [B8JK39_MOUSE]                                              | 0.87  | 1 | 1  | 1  | 1   | 0.96 | 1.14 | 1.18 | 0.92 | 0.95 | 0.93 | 0.96 | 0.93 | 0.96 | 0.93 | 0.97 | 0.97 | 1.01 | 114.34 | 6.07 |
| P57780 | Alpha-actinin-4 OS=Mus musculus GN=Actn4 PE=1 SV=1 - [ACTN4_MOUSE]                                             | 58.44 | 3 | 15 | 45 | 277 | 0.84 | 0.83 | 0.99 | 0.97 | 1.12 | 0.93 | 1.11 | 0.93 | 1.10 | 0.90 | 1.04 | 0.80 | 0.98 | 104.91 | 5.41 |
| P59999 | Actin-related protein 2/3 complex subunit 4 OS=Mus musculus GN=Arpc4 PE=1 SV=3 - [ARPC4_MOUSE]                 | 48.21 | 2 | 7  | 7  | 16  | 0.96 | 1.06 | 1.02 | 1.07 | 1.10 | 0.92 | 0.93 | 0.93 | 0.79 | 0.89 | 0.85 | 1.06 | 1.01 | 19.65  | 8.43 |
| Q922B2 | Aspartate--tRNA ligase, cytoplasmic OS=Mus musculus GN=Dars PE=2 SV=2 - [SYDC_MOUSE]                           | 41.52 | 2 | 17 | 17 | 62  | 1.07 | 1.01 | 1.05 | 1.06 | 1.00 | 0.96 | 0.90 | 0.93 | 0.86 | 0.98 | 0.92 | 1.03 | 0.98 | 57.11  | 6.49 |
| Q9DC11 | Target of rapamycin complex subunit LST8 OS=Mus musculus GN=Mlst8 PE=1 SV=1 - [LST8_MOUSE]                     | 12.27 | 1 | 3  | 3  | 5   | 1.07 | 1.15 | 1.07 | 0.90 | 0.79 | 1.08 | 0.96 | 0.93 | 0.91 | 0.89 | 0.83 | 1.10 | 1.14 | 35.83  | 5.86 |
| Q9D1C2 | Protein chibby homolog 1 OS=Mus musculus GN=Cby1 PE=2 SV=1 - [CBY1_MOUSE]                                      | 14.17 | 6 | 1  | 2  | 2   | 1.25 | 1.03 | 0.83 | 0.93 | 0.75 | 0.89 | 0.71 | 0.93 | 0.75 | 0.99 | 0.80 | 0.85 | 0.68 | 14.53  | 9.35 |
| G3UYP4 | Potassium voltage-gated channel subfamily KQT member 5 OS=Mus musculus GN=Kcnq5 PE=2 SV=1 - [G3UYP4_MOUSE]     | 5.35  | 4 | 3  | 4  | 8   | 0.91 | 1.00 | 1.11 | 1.01 | 1.08 | 0.94 | 1.03 | 0.93 | 1.03 | 1.00 | 1.08 | 0.86 | 0.92 | 90.00  | 9.42 |
| F8VPU2 | FERM, RhoGEF and pleckstrin domain-containing protein 1 OS=Mus musculus GN=Farp1 PE=1 SV=1 - [FARP1_MOUSE]     | 15.17 | 2 | 9  | 10 | 30  | 1.04 | 1.07 | 0.96 | 1.03 | 1.00 | 0.91 | 0.89 | 0.93 | 0.94 | 0.89 | 0.88 | 0.96 | 0.94 | 118.80 | 7.88 |
| Q8R574 | Phosphoribosyl pyrophosphate synthase associated protein 2 OS=Mus musculus GN=Prpsap2 PE=1 SV=1 - [KPRB_MOUSE] | 38.48 | 2 | 7  | 9  | 20  | 0.99 | 1.05 | 1.02 | 1.07 | 1.05 | 1.00 | 0.97 | 0.93 | 0.96 | 1.12 | 1.07 | 1.14 | 1.16 | 40.85  | 7.17 |

|          |                                                                                                                 |       |   |    |    |    |      |      |      |      |      |      |      |      |      |      |      |      |      |        |      |
|----------|-----------------------------------------------------------------------------------------------------------------|-------|---|----|----|----|------|------|------|------|------|------|------|------|------|------|------|------|------|--------|------|
| Q8BT60   | Copine-3 OS=Mus musculus GN=Cpne3 PE=1 SV=2 - [CPNE3_MOUSE]                                                     | 8.07  | 1 | 3  | 4  | 7  | 1.11 | 1.13 | 1.02 | 1.09 | 1.01 | 0.92 | 0.83 | 0.93 | 0.84 | 0.97 | 0.90 | 1.03 | 0.95 | 59.55  | 5.78 |
| P09528   | Ferritin heavy chain OS=Mus musculus GN=Fih1 PE=1 SV=2 - [FRIH_MOUSE]                                           | 54.95 | 1 | 8  | 8  | 37 | 0.87 | 0.74 | 0.81 | 0.82 | 0.91 | 0.90 | 1.03 | 0.93 | 1.04 | 0.83 | 0.98 | 0.97 | 1.03 | 21.05  | 5.88 |
| P06801   | NADP-dependent malic enzyme OS=Mus musculus GN=Me1 PE=1 SV=2 - [MAOX_MOUSE]                                     | 27.27 | 1 | 10 | 10 | 18 | 1.07 | 1.04 | 0.91 | 1.09 | 1.01 | 0.94 | 0.91 | 0.93 | 0.86 | 0.92 | 0.89 | 1.00 | 0.94 | 63.91  | 7.44 |
| Q9CRC8   | Leucine-rich repeat-containing protein 40 OS=Mus musculus GN=Lrc40 PE=2 SV=2 - [LRC40_MOUSE]                    | 7.14  | 5 | 4  | 4  | 6  | 1.05 | 1.20 | 1.09 | 1.12 | 1.06 | 0.99 | 0.93 | 0.93 | 0.88 | 1.12 | 1.06 | 1.12 | 1.04 | 68.03  | 6.89 |
| D3Z205   | Tumor necrosis factor alpha-induced protein 8 (Fragment) OS=Mus musculus GN=Tnfaip8 PE=2 SV=1 - [D3Z205_MOUSE]  | 25.97 | 8 | 1  | 1  | 2  | 1.01 | 0.99 | 0.98 | 0.84 | 0.83 | 1.04 | 1.02 | 0.93 | 0.92 | 0.94 | 0.93 | 1.13 | 1.11 | 8.42   | 4.88 |
| Q8BLE7   | Vesicular glutamate transporter 2 OS=Mus musculus GN=Slc17a6 PE=1 SV=1 - [VGLU2_MOUSE]                          | 17.35 | 1 | 6  | 6  | 30 | 1.10 | 0.88 | 0.86 | 1.20 | 1.08 | 0.95 | 0.84 | 0.93 | 0.89 | 1.07 | 1.05 | 1.00 | 0.91 | 64.52  | 6.68 |
| Q68FL0   | Slc8a1 protein OS=Mus musculus GN=Slc8a1 PE=2 SV=1 - [Q68FL0_MOUSE]                                             | 20.25 | 4 | 15 | 16 | 50 | 1.05 | 1.01 | 1.00 | 1.09 | 1.00 | 0.98 | 0.94 | 0.93 | 0.91 | 1.00 | 0.97 | 0.99 | 0.96 | 106.60 | 5.00 |
| P70202   | Latexin OS=Mus musculus GN=Lxn PE=1 SV=2 - [LXN_MOUSE]                                                          | 17.57 | 1 | 3  | 3  | 17 | 0.97 | 1.03 | 1.03 | 1.02 | 1.07 | 0.92 | 0.93 | 0.93 | 0.93 | 0.89 | 0.89 | 0.90 | 0.94 | 25.48  | 5.74 |
| Q3UIL6-3 | Isoform 3 of Pleckstrin homology domain-containing family A member 7 OS=Mus musculus GN=Plekha7 - [PKHA7_MOUSE] | 1.88  | 6 | 1  | 1  | 6  | 1.03 | 0.94 | 0.90 | 1.03 | 0.95 | 0.86 | 0.91 | 0.93 | 0.99 | 0.88 | 0.86 | 0.89 | 0.91 | 114.59 | 9.61 |
| Q6P8X1   | Sorting nexin-6 OS=Mus musculus GN=Snn6 PE=1 SV=2 - [SNX6_MOUSE]                                                | 20.69 | 1 | 8  | 10 | 27 | 0.94 | 0.88 | 0.92 | 0.97 | 1.00 | 0.97 | 1.01 | 0.93 | 1.05 | 0.90 | 1.00 | 0.88 | 0.93 | 46.62  | 6.16 |
| P70206   | Plexin-A1 OS=Mus musculus GN=Pxn1 PE=1 SV=1 - [PLXA1_MOUSE]                                                     | 10.72 | 2 | 10 | 18 | 31 | 0.95 | 1.16 | 1.10 | 1.01 | 1.07 | 0.86 | 0.92 | 0.93 | 0.93 | 0.97 | 1.02 | 0.97 | 1.01 | 210.96 | 6.90 |
| Q8C413   | Diacylglycerol kinase gamma OS=Mus musculus GN=Dgkg PE=2 SV=1 - [Q8C413_MOUSE]                                  | 10.28 | 3 | 7  | 7  | 11 | 1.13 | 0.99 | 0.85 | 1.06 | 0.94 | 1.04 | 0.91 | 0.93 | 0.79 | 1.00 | 0.89 | 1.16 | 1.03 | 83.92  | 6.39 |
| Q8BGQ7   | Alanine-tRNA ligase, cytoplasmic OS=Mus musculus GN=Aars PE=1 SV=1 - [SYAC_MOUSE]                               | 34.50 | 1 | 24 | 24 | 68 | 0.99 | 1.04 | 1.09 | 1.08 | 1.09 | 0.99 | 0.98 | 0.94 | 0.92 | 0.96 | 0.94 | 1.00 | 1.00 | 106.84 | 5.67 |

|        |                                                                                                                                    |       |    |    |    |     |      |      |      |      |      |      |      |      |      |      |      |      |      |        |      |
|--------|------------------------------------------------------------------------------------------------------------------------------------|-------|----|----|----|-----|------|------|------|------|------|------|------|------|------|------|------|------|------|--------|------|
| Q6NS60 | F-box only protein 41<br>OS=Mus musculus<br>GN=Fbxo41 PE=1<br>SV=3 -<br>[FBX41_MOUSE]                                              | 11.91 | 1  | 9  | 10 | 21  | 0.97 | 1.06 | 1.10 | 1.22 | 1.21 | 1.02 | 1.01 | 0.94 | 0.96 | 0.99 | 0.99 | 0.98 | 1.06 | 94.27  | 8.24 |
| O70589 | Peripheral plasma<br>membrane protein<br>CASK OS=Mus<br>musculus GN=Cask<br>PE=1 SV=2 -<br>[CSKP_MOUSE]                            | 32.29 | 11 | 23 | 23 | 61  | 1.03 | 0.89 | 0.90 | 1.02 | 1.01 | 0.91 | 0.92 | 0.94 | 0.94 | 0.86 | 0.89 | 0.99 | 1.00 | 105.04 | 6.43 |
| P08775 | DNA-directed RNA<br>polymerase II subunit<br>RPB1 OS=Mus<br>musculus GN=Polr2a<br>PE=1 SV=3 -<br>[RPB1_MOUSE]                      | 2.39  | 1  | 3  | 3  | 5   | 1.06 | 1.02 | 0.95 | 1.10 | 1.04 | 0.89 | 0.85 | 0.94 | 0.86 | 0.97 | 0.94 | 1.00 | 0.93 | 217.04 | 7.37 |
| Q8BX17 | Gem-associated protein<br>5 OS=Mus musculus<br>GN=Gemin5 PE=1<br>SV=2 -<br>[GEM15_MOUSE]                                           | 1.53  | 3  | 2  | 2  | 2   | 0.99 | 1.57 | 1.59 | 1.11 | 1.13 | 0.79 | 0.79 | 0.94 | 0.94 | 0.99 | 1.00 | 0.93 | 0.95 | 166.49 | 6.71 |
| Q8BM41 | Protein LSM14<br>homolog B OS=Mus<br>musculus GN=Lsm14b<br>PE=2 SV=1 -<br>[Q8BM41_MOUSE]                                           | 16.72 | 1  | 1  | 4  | 11  | 0.96 | 0.60 | 0.62 | 0.87 | 0.90 | 0.95 | 0.98 | 0.94 | 0.97 | 0.85 | 0.89 | 0.78 | 0.81 | 33.23  | 9.74 |
| Q9CZG9 | PDZ domain-<br>containing protein 11<br>OS=Mus musculus<br>GN=Pdzd11 PE=1<br>SV=1 -<br>[PDZ11_MOUSE]                               | 38.57 | 1  | 3  | 4  | 7   | 0.96 | 0.64 | 0.66 | 0.98 | 1.08 | 1.01 | 1.08 | 0.94 | 0.97 | 0.92 | 0.94 | 0.81 | 0.84 | 16.17  | 7.14 |
| Q8BGX2 | Uncharacterized<br>protein C19orf52<br>homolog OS=Mus<br>musculus PE=2 SV=1 -<br>[CS052_MOUSE]                                     | 19.17 | 1  | 3  | 3  | 6   | 1.04 | 1.33 | 1.31 | 0.95 | 0.92 | 1.06 | 0.98 | 0.94 | 0.90 | 1.05 | 1.02 | 1.13 | 1.05 | 29.40  | 6.73 |
| Q99J77 | N-acetylneuraminic<br>acid synthase (Sialic<br>acid synthase)<br>OS=Mus musculus<br>GN=Nans PE=2 SV=1 -<br>[Q99J77_MOUSE]          | 18.38 | 1  | 4  | 4  | 9   | 0.95 | 0.81 | 0.93 | 0.89 | 0.97 | 1.07 | 1.07 | 0.94 | 0.96 | 0.96 | 0.96 | 1.01 | 1.12 | 40.00  | 7.06 |
| Q9D051 | Pyruvate<br>dehydrogenase E1<br>component subunit<br>beta, mitochondrial<br>OS=Mus musculus<br>GN=Pdhb PE=1 SV=1 -<br>[ODPB_MOUSE] | 69.08 | 1  | 20 | 20 | 156 | 0.95 | 0.89 | 0.99 | 1.02 | 1.10 | 0.97 | 1.02 | 0.94 | 0.98 | 0.97 | 1.03 | 1.01 | 1.12 | 38.91  | 6.87 |
| G3UYZ1 | Immunoglobulin<br>superfamily member 8<br>OS=Mus musculus<br>GN=Igsf8 PE=2 SV=1 -<br>[G3UYZ1_MOUSE]                                | 36.86 | 3  | 13 | 13 | 122 | 1.02 | 1.14 | 1.12 | 1.06 | 1.01 | 0.93 | 0.92 | 0.94 | 0.92 | 1.00 | 0.98 | 0.99 | 0.98 | 58.10  | 7.91 |
| Q62172 | RalA-binding protein 1<br>OS=Mus musculus<br>GN=Raip1 PE=1<br>SV=4 -<br>[RBP1_MOUSE]                                               | 15.59 | 1  | 7  | 7  | 12  | 0.89 | 0.87 | 1.06 | 0.97 | 1.09 | 0.91 | 1.05 | 0.94 | 1.13 | 0.96 | 1.10 | 0.91 | 1.09 | 75.00  | 5.92 |

|        |                                                                                                                   |       |   |    |    |    |      |      |      |      |      |      |      |      |      |      |      |      |      |        |      |
|--------|-------------------------------------------------------------------------------------------------------------------|-------|---|----|----|----|------|------|------|------|------|------|------|------|------|------|------|------|------|--------|------|
| Q99J14 | 26S proteasome non-ATPase regulatory subunit 6 OS=Mus musculus GN=Psm6 PE=1 SV=1 - [PSMD6_MOUSE]                  | 20.57 | 1 | 8  | 8  | 22 | 1.08 | 1.07 | 1.09 | 1.15 | 1.08 | 0.95 | 0.86 | 0.94 | 0.89 | 1.03 | 0.99 | 1.11 | 1.05 | 45.51  | 5.52 |
| Q91Z61 | GTP-binding protein Di-Ras1 OS=Mus musculus GN=Diras1 PE=2 SV=1 - [DIRA1_MOUSE]                                   | 29.29 | 2 | 4  | 6  | 11 | 1.04 | 1.05 | 0.99 | 1.12 | 1.07 | 1.02 | 0.98 | 0.94 | 0.91 | 1.02 | 0.98 | 1.00 | 1.01 | 22.25  | 8.90 |
| Q3UGY8 | Brefeldin A-inhibited guanine nucleotide-exchange protein 3 OS=Mus musculus GN=Argef3 PE=1 SV=1 - [BIG3_MOUSE]    | 8.16  | 1 | 12 | 12 | 28 | 0.84 | 1.14 | 1.26 | 1.08 | 1.26 | 0.88 | 1.05 | 0.94 | 1.13 | 1.00 | 1.19 | 1.00 | 1.20 | 239.94 | 5.88 |
| Q8VED2 | Biogenesis of lysosome-related organelles complex 1 subunit 4 OS=Mus musculus GN=Blc1s4 PE=1 SV=1 - [BL1S4_MOUSE] | 14.88 | 1 | 1  | 1  | 1  | 1.10 | 0.84 | 0.77 | 0.82 | 0.75 | 1.11 | 1.00 | 0.94 | 0.85 | 1.04 | 0.95 | 0.73 | 0.66 | 23.10  | 5.14 |
| D3YXA2 | Lariat debranching enzyme (Fragment) OS=Mus musculus GN=Dbr1 PE=2 SV=1 - [D3YXA2_MOUSE]                           | 4.33  | 2 | 1  | 1  | 2  | 1.11 | 1.19 | 1.07 | 0.99 | 0.89 | 0.91 | 0.82 | 0.94 | 0.84 | 1.02 | 0.92 | 0.97 | 0.87 | 26.17  | 7.21 |
| P63073 | Eukaryotic translation initiation factor 4E OS=Mus musculus GN=Eif4e PE=1 SV=1 - [IF4E_MOUSE]                     | 25.35 | 1 | 5  | 5  | 12 | 0.93 | 0.69 | 0.74 | 0.99 | 1.02 | 1.04 | 1.02 | 0.94 | 0.98 | 0.86 | 0.95 | 0.90 | 0.99 | 25.04  | 6.15 |
| P26516 | 26S proteasome non-ATPase regulatory subunit 7 OS=Mus musculus GN=Psm7 PE=1 SV=2 - [PSMD7_MOUSE]                  | 28.35 | 1 | 5  | 5  | 16 | 0.92 | 0.95 | 0.88 | 0.88 | 1.07 | 0.82 | 1.01 | 0.94 | 0.97 | 1.01 | 0.98 | 0.88 | 1.06 | 36.52  | 6.77 |
| Q9Z247 | Peptidyl-prolyl cis-trans isomerase FKBP9 OS=Mus musculus GN=Fkbp9 PE=1 SV=1 - [FKBP9_MOUSE]                      | 4.56  | 1 | 2  | 2  | 2  | 0.95 | 0.96 | 1.01 | 0.98 | 1.04 | 0.83 | 0.87 | 0.94 | 0.98 | 0.95 | 1.01 | 0.99 | 1.04 | 62.96  | 5.21 |
| Q9WUM4 | Coronin-1C OS=Mus musculus GN=Coro1c PE=1 SV=2 - [COR1C_MOUSE]                                                    | 41.56 | 8 | 15 | 16 | 51 | 0.97 | 0.83 | 0.94 | 0.94 | 0.99 | 0.89 | 0.95 | 0.94 | 0.94 | 0.92 | 0.95 | 0.90 | 0.97 | 53.09  | 7.08 |
| Q8VC88 | Grancalcin OS=Mus musculus GN=Gca PE=2 SV=1 - [GRAN_MOUSE]                                                        | 5.00  | 1 | 1  | 1  | 2  | 1.05 | 1.03 | 0.98 | 1.17 | 1.11 | 1.01 | 0.96 | 0.94 | 0.89 | 0.96 | 0.91 | 0.99 | 0.95 | 24.65  | 5.07 |
| Q9CWJ9 | Bifunctional purine biosynthesis protein PURH OS=Mus musculus GN=Atic PE=1 SV=2 - [PUR9_MOUSE]                    | 41.89 | 1 | 17 | 17 | 30 | 1.11 | 1.10 | 1.02 | 1.09 | 1.00 | 0.96 | 0.88 | 0.94 | 0.89 | 0.97 | 0.89 | 1.09 | 0.96 | 64.18  | 6.76 |

|        |                                                                                                                                                                   |       |   |    |    |     |      |      |      |      |      |      |      |      |      |      |      |      |      |        |      |
|--------|-------------------------------------------------------------------------------------------------------------------------------------------------------------------|-------|---|----|----|-----|------|------|------|------|------|------|------|------|------|------|------|------|------|--------|------|
| D3YW26 | Protein Tada2b<br>OS=Mus musculus<br>GN=Tada2b PE=2<br>SV=1 -<br>[D3YW26_MOUSE]                                                                                   | 9.28  | 2 | 1  | 1  | 10  | 1.45 | 1.25 | 0.86 | 1.17 | 0.81 | 1.08 | 0.74 | 0.94 | 0.64 | 0.67 | 0.46 | 1.40 | 0.97 | 39.98  | 8.81 |
| F8VPX1 | Ubiquitin carboxyl-terminal hydrolase<br>OS=Mus musculus<br>GN=Usp7 PE=2 SV=1<br>- [F8VPX1_MOUSE]                                                                 | 24.48 | 7 | 19 | 19 | 48  | 1.02 | 1.06 | 1.03 | 1.05 | 1.07 | 0.97 | 0.97 | 0.94 | 0.93 | 0.95 | 0.94 | 1.01 | 0.97 | 128.39 | 5.55 |
| Q8CAD1 | Ras-binding protein<br>DA-Raf OS=Mus musculus<br>GN=Araf PE=2 SV=1 -<br>[Q8CAD1_MOUSE]                                                                            | 22.58 | 3 | 3  | 3  | 8   | 1.00 | 1.12 | 1.09 | 1.00 | 1.00 | 0.98 | 0.97 | 0.94 | 0.92 | 1.05 | 1.07 | 1.00 | 1.01 | 20.87  | 8.47 |
| Q9D1T0 | Leucine-rich repeat and immunoglobulin-like domain-containing nogo receptor-interacting protein 1<br>OS=Mus musculus<br>GN=Lingo1 PE=1<br>SV=1 -<br>[LIGO1_MOUSE] | 17.59 | 2 | 8  | 8  | 19  | 1.04 | 1.20 | 1.11 | 1.08 | 1.01 | 1.02 | 0.98 | 0.94 | 0.84 | 1.01 | 0.90 | 1.12 | 1.06 | 69.06  | 8.31 |
| P68254 | 14-3-3 protein theta<br>OS=Mus musculus<br>GN=Ywhaq PE=1<br>SV=1 -<br>[1433T_MOUSE]                                                                               | 68.98 | 6 | 13 | 19 | 500 | 1.00 | 0.93 | 0.97 | 0.97 | 0.99 | 0.97 | 0.98 | 0.94 | 0.95 | 0.95 | 0.96 | 0.91 | 0.93 | 27.76  | 4.78 |
| Q61753 | D-3-phosphoglycerate dehydrogenase<br>OS=Mus musculus<br>GN=Pghdh PE=1<br>SV=3 -<br>[SERA_MOUSE]                                                                  | 32.27 | 2 | 15 | 15 | 40  | 1.01 | 1.11 | 1.00 | 1.11 | 1.11 | 1.00 | 0.96 | 0.94 | 0.91 | 1.08 | 1.06 | 1.14 | 1.14 | 56.55  | 6.54 |
| Q8K1S2 | Netrin receptor<br>UNC5D OS=Mus musculus<br>GN=Unc5d PE=2 SV=1 -<br>[UNC5D_MOUSE]                                                                                 | 1.05  | 1 | 1  | 1  | 1   | 1.00 | 0.87 | 0.87 | 1.03 | 1.03 | 0.91 | 0.90 | 0.94 | 0.93 | 0.91 | 0.91 | 1.00 | 1.01 | 106.28 | 6.14 |
| P46664 | Adenylosuccinate synthetase isozyme 2<br>OS=Mus musculus<br>GN=Adss PE=1 SV=2 -<br>[PURA2_MOUSE]                                                                  | 25.88 | 1 | 8  | 8  | 24  | 0.98 | 1.03 | 1.02 | 1.04 | 1.08 | 1.00 | 1.01 | 0.94 | 0.97 | 0.95 | 1.01 | 1.07 | 0.95 | 49.99  | 6.38 |
| Q99JY9 | Actin-related protein 3<br>OS=Mus musculus<br>GN=Actr3 PE=1 SV=3<br>- [ARP3_MOUSE]                                                                                | 62.92 | 1 | 15 | 18 | 98  | 0.92 | 1.00 | 1.10 | 1.05 | 1.12 | 0.94 | 1.01 | 0.94 | 0.97 | 0.91 | 1.03 | 0.96 | 1.09 | 47.33  | 5.88 |
| Q9WUB0 | RanBP-type and C3HC4-type zinc finger-containing protein 1<br>OS=Mus musculus<br>GN=Rbck1 PE=1 SV=2 -<br>[HOIL1_MOUSE]                                            | 16.54 | 2 | 6  | 6  | 11  | 0.97 | 1.16 | 1.19 | 1.00 | 1.03 | 1.02 | 1.03 | 0.94 | 1.03 | 0.93 | 1.01 | 0.94 | 0.96 | 57.50  | 6.19 |

|        |                                                                                                                       |       |   |    |    |    |      |      |      |      |      |      |      |      |      |      |      |      |      |        |      |
|--------|-----------------------------------------------------------------------------------------------------------------------|-------|---|----|----|----|------|------|------|------|------|------|------|------|------|------|------|------|------|--------|------|
| A2A4A6 | 1-phosphatidylinositol 4,5-bisphosphate phosphodiesterase gamma-1 OS=Mus musculus GN=Pleg1 PE=4 SV=1 - [A2A4A6_MOUSE] | 5.58  | 4 | 6  | 6  | 11 | 1.07 | 1.08 | 1.03 | 1.03 | 0.95 | 0.92 | 0.85 | 0.94 | 0.81 | 0.99 | 0.84 | 1.09 | 0.98 | 148.44 | 5.99 |
| Q9R171 | Cerebellin-1 OS=Mus musculus GN=Cbln1 PE=1 SV=1 - [CBLN1_MOUSE]                                                       | 17.10 | 1 | 2  | 4  | 11 | 1.25 | 0.99 | 0.78 | 1.01 | 0.78 | 0.95 | 0.69 | 0.94 | 0.69 | 1.04 | 0.75 | 0.98 | 0.78 | 21.10  | 7.28 |
| Q5SUE8 | Isoform 2 of Ankyrin repeat domain-containing protein 40 OS=Mus musculus GN=Ankr40 - [ANR40_MOUSE]                    | 10.25 | 4 | 2  | 3  | 5  | 1.02 | 0.89 | 1.00 | 0.98 | 0.99 | 0.86 | 1.00 | 0.94 | 0.88 | 0.78 | 0.91 | 0.91 | 0.90 | 35.74  | 5.16 |
| E9QKZ2 | Importin-9 OS=Mus musculus GN=Ipo9 PE=2 SV=1 - [E9QKZ2_MOUSE]                                                         | 5.10  | 4 | 4  | 4  | 5  | 1.32 | 1.12 | 0.93 | 1.11 | 0.84 | 0.99 | 0.76 | 0.94 | 0.67 | 0.88 | 0.67 | 0.91 | 0.71 | 115.88 | 4.82 |
| Q7TNF0 | Double C2-like domain-containing protein alpha OS=Mus musculus GN=Doc2a PE=2 SV=1 - [DOC2A_MOUSE]                     | 17.78 | 4 | 5  | 6  | 14 | 0.94 | 1.02 | 1.05 | 0.95 | 0.97 | 0.85 | 0.90 | 0.94 | 0.98 | 0.86 | 0.95 | 0.92 | 0.97 | 44.58  | 7.12 |
| Q920Q6 | Isoform 3 of RNA-binding protein Musashi homolog 2 OS=Mus musculus GN=Msi2 - [MSI2H_MOUSE]                            | 20.21 | 5 | 4  | 4  | 6  | 0.91 | 0.69 | 0.94 | 0.98 | 1.05 | 0.82 | 0.90 | 0.94 | 1.03 | 0.90 | 1.05 | 0.97 | 1.07 | 30.87  | 9.10 |
| Q91WK2 | Eukaryotic translation initiation factor 3 subunit H OS=Mus musculus GN=Elf3h PE=1 SV=1 - [EIF3H_MOUSE]               | 28.41 | 1 | 9  | 9  | 14 | 1.03 | 0.85 | 0.86 | 1.05 | 0.99 | 1.03 | 0.90 | 0.94 | 0.90 | 0.95 | 0.88 | 0.97 | 0.90 | 39.81  | 6.67 |
| Q9D1A2 | Cytosolic non-specific dipeptidase OS=Mus musculus GN=Cndp2 PE=1 SV=1 - [CNDP2_MOUSE]                                 | 37.05 | 1 | 15 | 15 | 37 | 0.98 | 0.92 | 1.02 | 0.97 | 0.98 | 0.93 | 0.95 | 0.94 | 0.96 | 1.01 | 1.04 | 0.97 | 0.97 | 52.73  | 5.66 |
| Q6PAK3 | Protein arginine N-methyltransferase 8 OS=Mus musculus GN=Prmt8 PE=2 SV=2 - [ANM8_MOUSE]                              | 10.91 | 1 | 2  | 4  | 13 | 0.93 | 1.03 | 1.00 | 1.13 | 1.20 | 0.98 | 1.04 | 0.94 | 1.04 | 0.94 | 1.00 | 0.90 | 0.99 | 45.25  | 6.93 |
| Q80T41 | Gamma-aminobutyric acid type B receptor subunit 2 OS=Mus musculus GN=Gabbr2 PE=2 SV=2 - [GABR2_MOUSE]                 | 22.34 | 1 | 12 | 12 | 59 | 0.94 | 1.05 | 1.00 | 1.06 | 1.05 | 0.98 | 0.95 | 0.94 | 0.97 | 0.97 | 0.96 | 1.00 | 0.99 | 105.60 | 8.72 |



|        |                                                                                                                |       |    |    |    |     |      |      |      |      |      |      |      |      |      |      |      |      |      |       |      |
|--------|----------------------------------------------------------------------------------------------------------------|-------|----|----|----|-----|------|------|------|------|------|------|------|------|------|------|------|------|------|-------|------|
| P68404 | Protein kinase C beta type OS=Mus musculus GN=Prkcb PE=1 SV=4 - [KPCB_MOUSE]                                   | 46.20 | 5  | 1  | 27 | 117 | 0.73 | 0.74 | 1.00 | 1.04 | 1.42 | 0.86 | 1.16 | 0.94 | 1.27 | 0.94 | 1.29 | 0.75 | 1.03 | 76.70 | 7.01 |
| A2ARW8 | Protein Gm14399 OS=Mus musculus GN=Gm14399 PE=2 SV=1 - [A2ARW8_MOUSE]                                          | 9.84  | 40 | 1  | 2  | 2   | 0.98 | 0.73 | 0.75 | 0.88 | 0.90 | 0.94 | 0.96 | 0.94 | 0.95 | 0.97 | 0.99 | 0.79 | 0.81 | 70.85 | 9.29 |
| Q9QUH0 | Glutaredoxin-1 OS=Mus musculus GN=Glrx PE=1 SV=3 - [GLRX1_MOUSE]                                               | 57.94 | 1  | 4  | 4  | 34  | 0.91 | 0.87 | 0.89 | 0.79 | 0.83 | 0.98 | 1.00 | 0.94 | 0.93 | 0.89 | 0.90 | 0.84 | 0.82 | 11.86 | 8.37 |
| D3Z4S3 | Putative peptidyl-tRNA hydrolase PTRHD1 OS=Mus musculus GN=Ptrhd1 PE=3 SV=1 - [PTRD1_MOUSE]                    | 39.29 | 1  | 5  | 5  | 15  | 0.90 | 0.86 | 0.93 | 0.91 | 0.96 | 1.00 | 1.03 | 0.94 | 0.97 | 0.92 | 0.96 | 0.84 | 0.97 | 16.03 | 9.32 |
| Q8BG67 | Protein EFR3 homolog A OS=Mus musculus GN=Efr3a PE=1 SV=1 - [EFR3A_MOUSE]                                      | 7.45  | 3  | 4  | 5  | 10  | 1.02 | 1.29 | 1.08 | 1.24 | 1.19 | 0.92 | 0.88 | 0.94 | 0.91 | 1.02 | 1.02 | 1.19 | 1.01 | 92.55 | 6.83 |
| P31650 | Sodium- and chloride-dependent GABA transporter 3 OS=Mus musculus GN=Slc6a11 PE=1 SV=2 - [S6A11_MOUSE]         | 8.61  | 2  | 6  | 6  | 31  | 1.16 | 1.15 | 0.88 | 1.14 | 0.92 | 0.89 | 0.79 | 0.94 | 0.79 | 1.17 | 1.01 | 0.99 | 0.85 | 69.91 | 6.98 |
| Q8K1M3 | Protein kinase, cAMP dependent regulatory, type II alpha OS=Mus musculus GN=Prkar2a PE=2 SV=1 - [Q8K1M3_MOUSE] | 42.29 | 2  | 11 | 13 | 60  | 0.96 | 1.02 | 1.03 | 1.06 | 1.06 | 0.93 | 0.98 | 0.94 | 0.93 | 0.98 | 0.98 | 0.98 | 1.01 | 45.56 | 4.93 |
| O88531 | Palmitoyl-protein thioesterase 1 OS=Mus musculus GN=Ppt1 PE=2 SV=2 - [PPT1_MOUSE]                              | 16.34 | 3  | 4  | 4  | 13  | 0.98 | 1.06 | 1.08 | 1.04 | 1.00 | 0.91 | 0.89 | 0.94 | 0.95 | 1.01 | 0.99 | 1.02 | 1.08 | 34.47 | 8.00 |
| Q8VCE6 | 5(3)-deoxyribonucleotidase, mitochondrial OS=Mus musculus GN=Nt5m PE=2 SV=1 - [NT5M_MOUSE]                     | 15.91 | 1  | 3  | 3  | 4   | 1.09 | 0.85 | 0.78 | 1.00 | 0.92 | 1.04 | 0.95 | 0.94 | 0.86 | 1.07 | 0.98 | 1.00 | 0.92 | 25.59 | 8.35 |
| Q9JKD3 | Secretory carrier-associated membrane protein 5 OS=Mus musculus GN=Scamp5 PE=2 SV=1 - [SCAM5_MOUSE]            | 28.51 | 1  | 4  | 4  | 47  | 1.02 | 0.93 | 0.94 | 1.16 | 1.12 | 0.88 | 0.84 | 0.94 | 0.89 | 0.96 | 0.93 | 0.94 | 0.92 | 26.05 | 8.54 |
| Q91VE0 | Long-chain fatty acid transport protein 4 OS=Mus musculus GN=Slc27a4 PE=1 SV=1 - [S27A4_MOUSE]                 | 15.55 | 1  | 7  | 7  | 13  | 0.99 | 1.06 | 1.20 | 1.08 | 1.11 | 0.87 | 0.88 | 0.94 | 0.95 | 0.96 | 0.95 | 1.06 | 1.04 | 72.27 | 8.59 |
| P55264 | Adenosine kinase OS=Mus musculus GN=Adk PE=1 SV=2 - [ADK_MOUSE]                                                | 36.57 | 2  | 10 | 10 | 18  | 1.06 | 0.88 | 0.81 | 1.06 | 1.03 | 0.96 | 0.93 | 0.94 | 0.95 | 0.87 | 0.91 | 0.94 | 1.01 | 40.12 | 6.21 |

|          |                                                                                                                                        |       |   |    |    |     |      |      |      |      |      |      |      |      |      |      |      |      |      |        |      |
|----------|----------------------------------------------------------------------------------------------------------------------------------------|-------|---|----|----|-----|------|------|------|------|------|------|------|------|------|------|------|------|------|--------|------|
| Q920Q8-4 | Isoform 4 of Influenza virus NS1A-binding protein homolog OS=Mus musculus GN=Ivns1abp - [NS1BP_MOUSE]                                  | 1.83  | 3 | 1  | 1  | 2   | 1.01 | 1.09 | 1.08 | 1.00 | 1.00 | 0.92 | 0.91 | 0.94 | 0.93 | 1.01 | 1.01 | 1.01 | 1.01 | 66.63  | 5.91 |
| Q8BMQ2   | General transcription factor 3C polypeptide 4 OS=Mus musculus GN=Gt3c4 PE=1 SV=2 - [TF3C4_MOUSE]                                       | 4.65  | 4 | 2  | 2  | 3   | 0.93 | 1.22 | 1.31 | 0.85 | 0.99 | 1.04 | 1.12 | 0.94 | 1.01 | 1.09 | 1.08 | 1.05 | 1.14 | 91.55  | 6.73 |
| E9QL23   | Dystonin OS=Mus musculus GN=Dst PE=2 SV=1 - [E9QL23_MOUSE]                                                                             | 5.71  | 8 | 24 | 25 | 45  | 0.96 | 0.99 | 1.04 | 1.06 | 1.08 | 0.95 | 0.99 | 0.94 | 1.02 | 0.93 | 0.97 | 1.00 | 1.08 | 614.83 | 5.71 |
| Q8CBH5-  | Isoform 2 of Major facilitator superfamily domain-containing protein 6 OS=Mus musculus GN=Mfsd6 - [MFS6_MOUSE]                         | 4.78  | 4 | 3  | 3  | 5   | 1.20 | 1.04 | 0.87 | 0.97 | 0.81 | 0.97 | 0.77 | 0.94 | 0.79 | 1.02 | 0.87 | 0.99 | 0.83 | 85.70  | 5.72 |
| P35486   | Pyruvate dehydrogenase E1 component subunit alpha, somatic form, mitochondrial OS=Mus musculus GN=Pdha1 PE=1 SV=1 - [ODPA_MOUSE]       | 52.05 | 1 | 21 | 22 | 150 | 0.91 | 0.95 | 1.05 | 1.01 | 1.08 | 0.93 | 1.00 | 0.94 | 0.99 | 0.94 | 1.01 | 0.97 | 1.05 | 43.20  | 8.19 |
| Q9CQ75   | NADH dehydrogenase [ubiquinone] 1 alpha subcomplex subunit 2 OS=Mus musculus GN=Ndufa2 PE=1 SV=3 - [NDUA2_MOUSE]                       | 58.59 | 1 | 6  | 6  | 42  | 0.86 | 1.01 | 1.17 | 0.87 | 1.03 | 0.90 | 1.06 | 0.94 | 1.13 | 0.91 | 1.06 | 0.97 | 1.11 | 10.91  | 9.99 |
| P14094   | Sodium/potassium-transporting ATPase subunit beta-1 OS=Mus musculus GN=Atp1b1 PE=1 SV=1 - [AT1B1_MOUSE]                                | 48.03 | 1 | 16 | 16 | 266 | 1.01 | 0.98 | 0.94 | 1.10 | 1.11 | 0.92 | 0.92 | 0.94 | 0.94 | 0.96 | 0.96 | 0.95 | 0.95 | 35.17  | 8.65 |
| J3QPB5   | Nucleoporin NDC1 OS=Mus musculus GN=Tmem48 PE=4 SV=1 - [J3QPB5_MOUSE]                                                                  | 3.88  | 2 | 1  | 1  | 4   | 0.88 | 1.44 | 1.64 | 1.24 | 1.41 | 0.81 | 0.92 | 0.94 | 1.06 | 0.99 | 1.13 | 1.16 | 1.32 | 60.26  | 8.70 |
| G3UYJ1   | Mitochondrial translocator assembly and maintenance protein 41 homolog (Fragment) OS=Mus musculus GN=Tamm41 PE=2 SV=1 - [G3UYJ1_MOUSE] | 10.48 | 3 | 1  | 1  | 1   | 1.15 | 1.25 | 1.08 | 1.05 | 0.91 | 0.77 | 0.66 | 0.94 | 0.81 | 0.98 | 0.85 | 1.28 | 1.12 | 14.04  | 7.34 |

|         |                                                                                                             |       |   |    |    |     |      |      |      |      |      |      |      |      |      |      |      |      |      |        |      |
|---------|-------------------------------------------------------------------------------------------------------------|-------|---|----|----|-----|------|------|------|------|------|------|------|------|------|------|------|------|------|--------|------|
| Q80UJ7  | Rab3 GTPase-activating protein catalytic subunit OS=Mus musculus GN=Rab3gap1 PE=2 SV=4 - [RB3GP_MOUSE]      | 16.11 | 1 | 13 | 13 | 26  | 0.93 | 1.04 | 1.16 | 1.07 | 1.16 | 0.90 | 0.95 | 0.94 | 1.00 | 1.01 | 1.08 | 1.05 | 1.11 | 110.13 | 5.73 |
| O70172  | Phosphatidylinositol 5-phosphate 4-kinase type-2 alpha OS=Mus musculus GN=Pip4k2a PE=1 SV=1 - [PI42A_MOUSE] | 26.42 | 3 | 7  | 10 | 49  | 0.97 | 1.13 | 1.08 | 1.06 | 1.07 | 0.98 | 0.92 | 0.94 | 0.90 | 1.01 | 0.99 | 0.98 | 1.01 | 46.12  | 6.99 |
| Q9QYS2  | Metabotropic glutamate receptor 3 OS=Mus musculus GN=Grm3 PE=2 SV=1 - [GRM3_MOUSE]                          | 25.37 | 1 | 17 | 18 | 56  | 0.96 | 1.01 | 1.03 | 1.13 | 1.17 | 0.94 | 0.96 | 0.94 | 0.96 | 0.97 | 0.98 | 0.95 | 0.97 | 99.05  | 7.75 |
| Q9CQB5  | CDGSH iron-sulfur domain-containing protein 2 OS=Mus musculus GN=Cisd2 PE=1 SV=1 - [CISD2_MOUSE]            | 21.48 | 2 | 2  | 2  | 8   | 1.01 | 0.85 | 0.85 | 1.07 | 1.01 | 1.03 | 0.99 | 0.94 | 0.93 | 1.04 | 1.06 | 0.93 | 0.90 | 15.23  | 9.51 |
| Q14BI2  | Metabotropic glutamate receptor 2 OS=Mus musculus GN=Grm2 PE=2 SV=2 - [GRM2_MOUSE]                          | 19.72 | 1 | 12 | 14 | 34  | 0.89 | 1.08 | 1.26 | 1.21 | 1.33 | 0.85 | 0.96 | 0.94 | 1.06 | 0.87 | 1.03 | 0.90 | 1.07 | 95.83  | 8.06 |
| E9Q8N5  | CLIP-associating protein 2 OS=Mus musculus GN=Clasp2 PE=2 SV=1 - [E9Q8N5_MOUSE]                             | 20.06 | 6 | 20 | 22 | 46  | 1.02 | 1.18 | 1.15 | 1.09 | 1.11 | 0.95 | 0.96 | 0.94 | 0.93 | 1.03 | 1.02 | 1.05 | 1.07 | 140.64 | 8.63 |
| Q8R2U0- | Isoform 2 of Nucleoporin SEH1 OS=Mus musculus GN=Seh1 - [SEH1_MOUSE]                                        | 9.24  | 2 | 2  | 2  | 5   | 0.94 | 1.17 | 1.16 | 1.14 | 1.13 | 1.22 | 1.31 | 0.94 | 0.96 | 0.90 | 1.01 | 0.95 | 1.08 | 39.40  | 7.88 |
| P08113  | Endoplasmic reticulum chaperone protein OS=Mus musculus GN=Hsp90b1 PE=1 SV=2 - [ENPL_MOUSE]                 | 41.90 | 2 | 30 | 32 | 111 | 1.02 | 1.01 | 0.99 | 1.02 | 1.02 | 0.96 | 0.94 | 0.94 | 0.92 | 0.96 | 0.92 | 0.95 | 0.93 | 92.42  | 4.82 |
| Q9QY81  | Nuclear pore membrane glycoprotein 210 OS=Mus musculus GN=Nup210 PE=1 SV=2 - [PO210_MOUSE]                  | 0.74  | 1 | 1  | 1  | 1   | 0.87 | 1.42 | 1.63 | 1.07 | 1.23 | 0.66 | 0.75 | 0.94 | 1.08 | 0.71 | 0.82 | 1.05 | 1.21 | 203.97 | 6.65 |
| Q8BYM8  | Probable cysteine--tRNA ligase, mitochondrial OS=Mus musculus GN=Cars2 PE=2 SV=2 - [SYCM_MOUSE]             | 7.44  | 2 | 3  | 3  | 6   | 1.01 | 1.22 | 1.20 | 1.02 | 1.00 | 0.99 | 1.00 | 0.94 | 0.94 | 1.10 | 1.09 | 1.08 | 1.07 | 61.23  | 8.18 |
| Q9DBY8  | Nuclear valosin-containing protein-like OS=Mus musculus GN=Nvl PE=1 SV=1 - [NVL_MOUSE]                      | 0.70  | 1 | 1  | 1  | 1   | 0.86 | 0.94 | 1.09 | 1.02 | 1.17 | 0.93 | 1.07 | 0.94 | 1.08 | 1.02 | 1.18 | 1.05 | 1.22 | 94.42  | 6.35 |
| Q3TYD4  | Arylsulfatase G OS=Mus musculus GN=Arsg PE=2 SV=1 - [ARSG_MOUSE]                                            | 10.48 | 2 | 4  | 4  | 8   | 0.89 | 1.10 | 1.01 | 0.94 | 1.05 | 0.93 | 1.04 | 0.94 | 1.06 | 0.89 | 0.97 | 0.94 | 0.95 | 57.40  | 6.39 |

|          |                                                                                                                     |       |   |    |    |    |      |      |      |      |      |      |      |      |      |      |      |      |      |        |       |
|----------|---------------------------------------------------------------------------------------------------------------------|-------|---|----|----|----|------|------|------|------|------|------|------|------|------|------|------|------|------|--------|-------|
| Q8CGZ0   | Calcium homeostasis endoplasmic reticulum protein OS=Mus musculus GN=Cherp PE=1 SV=1 - [CHERP_MOUSE]                | 11.54 | 2 | 7  | 7  | 14 | 1.01 | 1.01 | 0.94 | 0.96 | 0.99 | 0.94 | 0.88 | 0.94 | 0.97 | 0.80 | 0.78 | 0.78 | 0.82 | 106.10 | 9.14  |
| Q61136   | Serine/threonine-protein kinase PRP4 homolog OS=Mus musculus GN=Prpf4b PE=1 SV=3 - [PRP4B_MOUSE]                    | 7.45  | 1 | 6  | 7  | 11 | 0.86 | 0.80 | 0.98 | 0.85 | 0.90 | 0.96 | 0.98 | 0.94 | 1.08 | 0.95 | 1.15 | 1.05 | 1.06 | 116.90 | 10.23 |
| Q149F3   | Eukaryotic peptide chain release factor GTP-binding subunit ERF3B OS=Mus musculus GN=Gsp2 PE=1 SV=1 - [ERF3B_MOUSE] | 30.70 | 2 | 4  | 16 | 50 | 1.21 | 1.05 | 0.77 | 0.95 | 0.85 | 1.00 | 0.73 | 0.94 | 0.79 | 0.94 | 0.77 | 1.13 | 0.90 | 69.10  | 5.20  |
| D3YTP3   | Protein Mtx3 OS=Mus musculus GN=Mtx3 PE=4 SV=2 - [D3YTP3_MOUSE]                                                     | 25.00 | 1 | 5  | 5  | 15 | 1.16 | 0.97 | 0.86 | 1.13 | 0.98 | 0.93 | 0.83 | 0.94 | 0.88 | 0.92 | 0.79 | 0.95 | 0.92 | 34.87  | 7.99  |
| P50429   | Arylsulfatase B OS=Mus musculus GN=Ar5b PE=2 SV=3 - [ARSB_MOUSE]                                                    | 11.99 | 2 | 6  | 6  | 12 | 1.08 | 0.96 | 0.93 | 1.02 | 0.99 | 0.89 | 0.91 | 0.94 | 0.89 | 0.82 | 0.76 | 0.90 | 0.85 | 59.61  | 7.24  |
| P61161   | Actin-related protein 2 OS=Mus musculus GN=Actr2 PE=1 SV=1 - [ARP2_MOUSE]                                           | 50.51 | 1 | 14 | 14 | 69 | 0.95 | 1.03 | 1.00 | 1.06 | 1.07 | 0.95 | 0.99 | 0.94 | 0.97 | 0.95 | 1.03 | 1.02 | 1.07 | 44.73  | 6.74  |
| P80317   | T-complex protein 1 subunit zeta OS=Mus musculus GN=Ct6a PE=1 SV=3 - [TCPZ_MOUSE]                                   | 43.88 | 4 | 17 | 17 | 63 | 0.97 | 1.07 | 1.00 | 1.10 | 1.11 | 0.97 | 0.95 | 0.94 | 0.91 | 0.99 | 1.00 | 1.04 | 1.05 | 57.97  | 7.08  |
| E9Q7G1   | Protein Tmed7 OS=Mus musculus GN=Tmed7 PE=2 SV=1 - [E9Q7G1_MOUSE]                                                   | 12.23 | 2 | 2  | 2  | 3  | 1.17 | 1.13 | 0.96 | 1.02 | 0.87 | 1.03 | 0.87 | 0.94 | 0.80 | 0.94 | 0.80 | 0.90 | 0.77 | 21.26  | 6.20  |
| P62849-2 | Isoform 2 of 40S ribosomal protein S24 OS=Mus musculus GN=Rps24 - [RS24_MOUSE]                                      | 26.15 | 3 | 3  | 3  | 9  | 1.03 | 1.05 | 1.19 | 1.00 | 1.11 | 0.97 | 0.91 | 0.94 | 0.95 | 1.00 | 1.00 | 1.13 | 1.10 | 15.06  | 10.89 |
| E9QNF7   | Contactin-associated protein-like 2 OS=Mus musculus GN=Cntmap2 PE=2 SV=1 - [E9QNF7_MOUSE]                           | 21.92 | 3 | 20 | 20 | 48 | 0.99 | 1.09 | 1.17 | 1.03 | 1.04 | 0.91 | 0.91 | 0.94 | 0.94 | 0.95 | 0.99 | 0.98 | 1.02 | 148.16 | 6.76  |
| Q9DAW6   | U4/U6 small nuclear ribonucleoprotein Prp4 OS=Mus musculus GN=Prpf4 PE=2 SV=1 - [PRP4_MOUSE]                        | 16.12 | 1 | 7  | 7  | 12 | 0.97 | 0.95 | 1.07 | 1.07 | 1.15 | 0.96 | 1.04 | 0.94 | 0.95 | 0.95 | 0.94 | 0.98 | 0.95 | 58.33  | 7.28  |
| P70423   | Cationic amino acid transporter 3 OS=Mus musculus GN=Slc7a3 PE=2 SV=1 - [CTR3_MOUSE]                                | 2.75  | 1 | 1  | 1  | 2  | 1.47 | 1.33 | 0.91 | 1.21 | 0.82 | 1.22 | 0.83 | 0.94 | 0.64 | 1.16 | 0.79 | 1.15 | 0.79 | 67.42  | 7.37  |

|         |                                                                                                                            |       |   |    |    |     |      |      |      |      |      |      |      |      |      |      |      |      |      |        |      |
|---------|----------------------------------------------------------------------------------------------------------------------------|-------|---|----|----|-----|------|------|------|------|------|------|------|------|------|------|------|------|------|--------|------|
| Q8K0D7  | Tail-anchored protein insertion receptor WRB OS=Mus musculus GN=Wrb PE=2 SV=1 - [WRB_MOUSE]                                | 13.22 | 1 | 2  | 2  | 4   | 1.37 | 1.17 | 1.07 | 1.13 | 1.06 | 0.98 | 0.76 | 0.94 | 0.87 | 0.93 | 0.77 | 1.17 | 0.86 | 19.85  | 9.79 |
| F6ZG17  | Molybdopterin synthase catalytic subunit OS=Mus musculus GN=Mocs2 PE=4 SV=1 - [F6ZG17_MOUSE]                               | 36.36 | 2 | 3  | 3  | 8   | 1.01 | 0.87 | 0.88 | 0.84 | 0.79 | 0.89 | 0.82 | 0.94 | 0.97 | 0.77 | 0.85 | 0.91 | 0.89 | 9.70   | 4.61 |
| D3Z7R4  | Synaptotagmin-1 (Fragment) OS=Mus musculus GN=Syt1 PE=2 SV=1 - [D3Z7R4_MOUSE]                                              | 32.63 | 1 | 2  | 9  | 131 | 1.07 | 0.64 | 0.59 | 1.03 | 0.95 | 1.03 | 0.93 | 0.94 | 0.83 | 0.79 | 0.73 | 0.75 | 0.70 | 26.28  | 8.24 |
| Q9D6V7- | Isoform 3 of Mitochondrial peptide methionine sulfoxide reductase OS=Mus musculus GN=MsrA - [MSRA_MOUSE]                   | 25.39 | 4 | 4  | 4  | 9   | 0.96 | 0.95 | 0.95 | 0.93 | 1.02 | 0.91 | 0.95 | 0.94 | 0.97 | 0.95 | 1.00 | 0.89 | 0.98 | 21.54  | 7.58 |
| Q06138  | Calcium-binding protein 39 OS=Mus musculus GN=Cab39 PE=1 SV=2 - [CAB39_MOUSE]                                              | 24.05 | 4 | 8  | 8  | 16  | 1.17 | 1.04 | 0.92 | 1.07 | 0.85 | 0.96 | 0.86 | 0.94 | 0.77 | 0.95 | 0.87 | 1.13 | 0.96 | 39.82  | 6.89 |
| Q8BNW9  | Kelch repeat and BTB domain-containing protein 11 OS=Mus musculus GN=Kbtbd11 PE=1 SV=3 - [KBTBB_MOUSE]                     | 28.28 | 1 | 12 | 12 | 32  | 1.02 | 1.20 | 1.16 | 1.07 | 1.08 | 0.89 | 0.86 | 0.94 | 0.96 | 0.95 | 0.96 | 1.03 | 1.07 | 67.90  | 5.39 |
| Q6P8N8  | ATP-dependent Clp protease ATP-binding subunit clpX-like, mitochondrial OS=Mus musculus GN=Clpx PE=2 SV=1 - [Q6P8N8_MOUSE] | 7.10  | 2 | 3  | 3  | 4   | 0.90 | 0.78 | 0.82 | 0.87 | 1.02 | 0.76 | 0.83 | 0.94 | 1.10 | 1.00 | 1.17 | 0.76 | 0.89 | 67.29  | 7.55 |
| D6RET7  | GRAM domain-containing protein 4 OS=Mus musculus GN=Gramd4 PE=2 SV=1 - [D6RET7_MOUSE]                                      | 2.79  | 3 | 1  | 1  | 2   | 0.99 | 1.07 | 1.08 | 1.15 | 1.16 | 0.88 | 0.89 | 0.94 | 0.95 | 1.04 | 1.05 | 1.08 | 1.09 | 37.57  | 8.13 |
| E9QLA5  | Inverted formin-2 OS=Mus musculus GN=Inf2 PE=4 SV=1 - [E9QLA5_MOUSE]                                                       | 17.70 | 3 | 12 | 12 | 31  | 0.97 | 1.13 | 1.19 | 1.09 | 1.13 | 1.10 | 1.19 | 0.94 | 1.15 | 1.13 | 1.21 | 1.23 | 1.20 | 138.28 | 5.22 |
| Q9D2N9  | Vacuolar protein sorting-associated protein 33A OS=Mus musculus GN=Vps33a PE=1 SV=2 - [VP33A_MOUSE]                        | 2.68  | 1 | 2  | 2  | 2   | 1.00 | 0.93 | 0.93 | 1.15 | 1.15 | 0.98 | 0.97 | 0.94 | 0.94 | 1.06 | 1.06 | 0.97 | 0.97 | 67.51  | 7.08 |
| Q9WU78  | Programmed cell death 6-interacting protein OS=Mus musculus GN=Pcdc6p PE=1 SV=3 - [PDC6_MOUSE]                             | 41.77 | 3 | 28 | 28 | 81  | 0.94 | 0.87 | 0.90 | 1.01 | 1.07 | 0.92 | 0.99 | 0.94 | 0.97 | 0.96 | 1.01 | 0.92 | 1.03 | 95.96  | 6.52 |

|        |                                                                                                                                     |       |   |    |    |     |      |      |      |      |      |      |      |      |      |      |      |      |      |        |      |
|--------|-------------------------------------------------------------------------------------------------------------------------------------|-------|---|----|----|-----|------|------|------|------|------|------|------|------|------|------|------|------|------|--------|------|
| Q9D0C4 | Isoform 2 of tRNA (guanine(37)-N1)-methyltransferase OS=Mus musculus GN=Trmt5 - [TRM5_MOUSE]                                        | 2.05  | 2 | 1  | 1  | 1   | 1.16 | 1.29 | 1.11 | 0.99 | 0.85 | 0.90 | 0.77 | 0.94 | 0.81 | 0.85 | 0.73 | 0.78 | 0.67 | 55.43  | 8.32 |
| Q8K4X7 | 1-acyl-sn-glycerol-3-phosphate acyltransferase delta OS=Mus musculus GN=Agpat4 PE=2 SV=1 - [PLCD_MOUSE]                             | 5.82  | 1 | 3  | 3  | 4   | 0.97 | 1.18 | 1.21 | 1.16 | 1.19 | 0.98 | 1.01 | 0.94 | 0.96 | 1.06 | 1.12 | 1.07 | 1.28 | 43.78  | 8.38 |
| Q9D7N3 | 28S ribosomal protein S9, mitochondrial OS=Mus musculus GN=Mrps9 PE=1 SV=3 - [RT09_MOUSE]                                           | 14.10 | 1 | 4  | 4  | 9   | 0.84 | 0.98 | 0.97 | 0.90 | 0.99 | 0.83 | 0.97 | 0.94 | 0.98 | 0.95 | 1.06 | 0.86 | 0.90 | 44.90  | 8.81 |
| M0QWA1 | Protein Csm2 (Fragment) OS=Mus musculus GN=Csm2 PE=4 SV=1 - [M0QWA1_MOUSE]                                                          | 1.96  | 1 | 5  | 6  | 12  | 0.97 | 0.97 | 0.97 | 0.99 | 1.01 | 0.91 | 0.93 | 0.94 | 1.01 | 0.86 | 0.88 | 0.90 | 0.90 | 372.41 | 6.01 |
| Q62277 | Synaptophysin OS=Mus musculus GN=Syp PE=1 SV=2 - [SYPH_MOUSE]                                                                       | 36.62 | 2 | 11 | 12 | 74  | 1.22 | 1.15 | 1.01 | 1.18 | 0.97 | 0.89 | 0.74 | 0.94 | 0.81 | 0.99 | 0.81 | 1.10 | 0.97 | 34.00  | 4.94 |
| E9QKT1 | Ubiquitin-protein ligase E3A OS=Mus musculus GN=Ubc3a PE=2 SV=1 - [E9QKT1_MOUSE]                                                    | 14.02 | 2 | 9  | 9  | 22  | 1.01 | 1.15 | 1.14 | 1.08 | 1.10 | 0.94 | 0.90 | 0.94 | 0.97 | 0.94 | 0.97 | 1.04 | 1.01 | 99.76  | 5.08 |
| Q9Z1R9 | MCG124046 OS=Mus musculus GN=Prss1 PE=2 SV=1 - [Q9Z1R9_MOUSE]                                                                       | 12.20 | 2 | 1  | 2  | 219 | 1.47 | 0.93 | 0.63 | 1.00 | 0.67 | 1.05 | 0.69 | 0.94 | 0.64 | 0.87 | 0.57 | 0.98 | 0.67 | 26.12  | 4.94 |
| Q3TJ18 | Corticosteroid 11-beta-dehydrogenase isozyme 1 OS=Mus musculus GN=Hsd11b1 PE=2 SV=1 - [Q3TJ18_MOUSE]                                | 8.02  | 2 | 2  | 2  | 3   | 0.90 | 0.91 | 1.01 | 0.77 | 0.86 | 0.87 | 0.96 | 0.94 | 1.04 | 0.63 | 0.70 | 0.74 | 0.83 | 28.67  | 8.72 |
| Q6PD03 | Serine/threonine-protein phosphatase 2A 56 kDa regulatory subunit alpha isoform OS=Mus musculus GN=Ppp2r5a PE=1 SV=1 - [2A5A_MOUSE] | 12.55 | 1 | 5  | 6  | 8   | 0.94 | 0.99 | 1.18 | 1.04 | 1.13 | 0.88 | 0.91 | 0.94 | 1.02 | 1.01 | 1.08 | 1.03 | 1.04 | 56.31  | 7.03 |
| E9PUA3 | IQ motif and SEC7 domain-containing protein 1 OS=Mus musculus GN=Iqsec1 PE=2 SV=1 - [E9PUA3_MOUSE]                                  | 26.21 | 3 | 20 | 21 | 48  | 1.03 | 1.11 | 1.09 | 1.13 | 1.16 | 0.96 | 0.98 | 0.94 | 0.93 | 0.97 | 0.99 | 0.97 | 1.01 | 122.58 | 8.47 |
| A2AQ07 | Tubulin beta-1 chain OS=Mus musculus GN=Tubb1 PE=1 SV=1 - [TBB1_MOUSE]                                                              | 16.19 | 1 | 2  | 7  | 173 | 0.85 | 0.99 | 1.17 | 1.12 | 1.32 | 1.04 | 1.23 | 0.94 | 1.11 | 0.75 | 0.88 | 0.71 | 0.84 | 50.41  | 5.07 |

|        |                                                                                                                         |       |    |    |    |    |      |      |      |      |      |      |      |      |      |      |      |      |      |        |      |
|--------|-------------------------------------------------------------------------------------------------------------------------|-------|----|----|----|----|------|------|------|------|------|------|------|------|------|------|------|------|------|--------|------|
| Q64336 | T-box brain protein 1<br>OS=Mus musculus<br>GN=Tbr1 PE=2 SV=2 -<br>[TBR1_MOUSE]                                         | 29.07 | 5  | 15 | 15 | 26 | 0.90 | 0.89 | 1.02 | 0.94 | 1.00 | 0.89 | 0.96 | 0.94 | 1.06 | 0.79 | 0.90 | 0.73 | 0.81 | 73.89  | 7.33 |
| D3Z4D2 | RUN and FYVE<br>domain-containing<br>protein 2 OS=Mus<br>musculus GN=Rufy2<br>PE=2 SV=1 -<br>[D3Z4D2_MOUSE]             | 4.22  | 4  | 1  | 2  | 7  | 0.97 | 1.03 | 1.06 | 1.15 | 1.18 | 1.03 | 1.06 | 0.94 | 0.97 | 1.02 | 1.06 | 1.07 | 1.11 | 46.13  | 5.11 |
| Q6PDN3 | Isoform 3 of Myosin<br>light chain kinase,<br>smooth muscle<br>OS=Mus musculus<br>GN=Mylk -<br>[MYLK_MOUSE]             | 12.90 | 16 | 9  | 10 | 15 | 0.98 | 0.96 | 1.01 | 0.96 | 0.99 | 0.77 | 0.81 | 0.94 | 1.02 | 1.01 | 1.04 | 0.83 | 0.91 | 113.63 | 5.38 |
| G3UW55 | MCG14937 OS=Mus<br>musculus<br>GN=A230065H16Rik<br>PE=4 SV=1 -<br>[G3UW55_MOUSE]                                        | 33.33 | 1  | 2  | 2  | 15 | 1.61 | 0.99 | 0.67 | 0.78 | 0.47 | 1.18 | 0.67 | 0.94 | 0.59 | 1.62 | 1.01 | 1.52 | 0.94 | 11.42  | 4.75 |
| Q8C2Q8 | ATP synthase subunit<br>gamma OS=Mus<br>musculus GN=Atp5c1<br>PE=2 SV=1 -<br>[Q8C2Q8_MOUSE]                             | 37.59 | 7  | 9  | 9  | 68 | 0.98 | 1.00 | 1.06 | 1.12 | 1.08 | 0.98 | 1.00 | 0.94 | 0.95 | 1.03 | 1.01 | 1.03 | 1.03 | 30.24  | 8.84 |
| P48024 | Eukaryotic translation<br>initiation factor 1<br>OS=Mus musculus<br>GN=Eif1 PE=2 SV=2 -<br>[EIF1_MOUSE]                 | 61.95 | 5  | 2  | 7  | 67 | 1.08 | 0.85 | 0.79 | 0.98 | 0.90 | 0.94 | 0.83 | 0.94 | 0.87 | 0.87 | 0.77 | 0.95 | 0.85 | 12.74  | 7.44 |
| Q6NZM9 | Histone deacetylase 4<br>OS=Mus musculus<br>GN=Hdac4 PE=1<br>SV=1 -<br>[HDAC4_MOUSE]                                    | 15.24 | 2  | 12 | 12 | 33 | 1.01 | 1.00 | 0.99 | 0.95 | 0.94 | 0.95 | 0.82 | 0.94 | 0.95 | 0.86 | 0.77 | 0.90 | 0.85 | 118.49 | 6.92 |
| F8WHM5 | Golgi apparatus protein<br>1 (Fragment) OS=Mus<br>musculus GN=Glg1<br>PE=2 SV=1 -<br>[F8WHM5_MOUSE]                     | 23.90 | 4  | 24 | 24 | 50 | 1.07 | 1.07 | 0.99 | 1.02 | 0.99 | 0.97 | 0.90 | 0.94 | 0.90 | 0.97 | 0.89 | 1.02 | 0.94 | 132.26 | 6.93 |
| Q8K021 | Secretory carrier-<br>associated membrane<br>protein 1 OS=Mus<br>musculus GN=Scamp1<br>PE=1 SV=1 -<br>[SCAM1_MOUSE]     | 29.29 | 3  | 6  | 6  | 57 | 1.07 | 0.97 | 0.92 | 1.07 | 1.02 | 0.95 | 0.91 | 0.94 | 0.89 | 1.00 | 0.96 | 0.97 | 0.94 | 38.00  | 7.71 |
| P15920 | V-type proton ATPase<br>116 kDa subunit a<br>isoform 2 OS=Mus<br>musculus<br>GN=Atp6v0a2 PE=1<br>SV=2 -<br>[VPP2_MOUSE] | 1.29  | 1  | 1  | 1  | 2  | 1.05 | 1.34 | 1.28 | 1.20 | 1.15 | 0.93 | 0.88 | 0.94 | 0.90 | 0.99 | 0.95 | 1.03 | 0.98 | 98.08  | 6.64 |
| Q61330 | Contactin-2 OS=Mus<br>musculus GN=Ctn2<br>PE=2 SV=2 -<br>[CNTN2_MOUSE]                                                  | 27.60 | 1  | 19 | 19 | 59 | 0.96 | 1.01 | 1.05 | 1.02 | 1.07 | 0.98 | 1.00 | 0.94 | 0.98 | 0.98 | 0.98 | 0.97 | 0.97 | 113.15 | 7.62 |

|        |                                                                                                                      |       |   |    |    |     |      |      |      |      |      |      |      |      |      |      |      |      |      |        |      |
|--------|----------------------------------------------------------------------------------------------------------------------|-------|---|----|----|-----|------|------|------|------|------|------|------|------|------|------|------|------|------|--------|------|
| Q3TXS7 | 26S proteasome non-ATPase regulatory subunit 1 OS=Mus musculus GN=Psm1 PE=1 SV=1 - [PSMD1_MOUSE]                     | 23.92 | 3 | 16 | 16 | 40  | 0.97 | 0.97 | 0.91 | 1.02 | 1.01 | 0.99 | 0.98 | 0.94 | 0.93 | 0.95 | 1.00 | 0.99 | 1.03 | 105.66 | 5.39 |
| Q9DCM2 | Glutathione S-transferase kappa 1 OS=Mus musculus GN=Gstk1 PE=1 SV=3 - [GSTK1_MOUSE]                                 | 12.39 | 1 | 2  | 2  | 5   | 1.04 | 0.94 | 0.91 | 1.07 | 1.06 | 1.02 | 1.00 | 0.94 | 0.91 | 1.06 | 1.05 | 1.06 | 1.03 | 25.69  | 8.88 |
| Q5FWK3 | Rho GTPase-activating protein 1 OS=Mus musculus GN=Arhgap1 PE=1 SV=1 - [RHG01_MOUSE]                                 | 35.31 | 2 | 10 | 10 | 24  | 1.04 | 1.06 | 1.05 | 1.10 | 1.10 | 0.88 | 0.91 | 0.94 | 0.97 | 0.94 | 1.02 | 1.06 | 1.03 | 50.38  | 6.44 |
| Q91WR3 | Isoform 2 of Activating signal cointegrator 1 complex subunit 2 OS=Mus musculus GN=Ascc2 - [ASCC2_MOUSE]             | 6.21  | 3 | 2  | 2  | 3   | 1.14 | 1.11 | 0.97 | 1.10 | 0.97 | 1.12 | 0.98 | 0.94 | 0.83 | 0.89 | 0.78 | 0.97 | 0.86 | 80.93  | 4.94 |
| A2APV2 | Isoform 3 of Formin-like protein 2 OS=Mus musculus GN=Fmnl2 - [FMNL2_MOUSE]                                          | 6.97  | 7 | 5  | 7  | 12  | 0.97 | 1.15 | 1.22 | 1.14 | 1.14 | 0.90 | 0.87 | 0.94 | 1.06 | 1.00 | 1.04 | 1.04 | 1.11 | 123.90 | 7.65 |
| G5E832 | Adenomatous polyposis coli 2 OS=Mus musculus GN=Apc2 PE=4 SV=1 - [G5E832_MOUSE]                                      | 2.51  | 3 | 1  | 3  | 4   | 0.83 | 0.98 | 1.18 | 0.86 | 1.03 | 1.00 | 1.19 | 0.94 | 1.13 | 0.81 | 0.97 | 0.89 | 1.07 | 242.96 | 8.88 |
| Q9JIW9 | Ras-related protein RalB OS=Mus musculus GN=Ralb PE=2 SV=1 - [RALB_MOUSE]                                            | 49.03 | 2 | 4  | 9  | 88  | 1.14 | 0.83 | 0.72 | 1.02 | 0.93 | 0.94 | 0.85 | 0.94 | 0.92 | 0.95 | 0.85 | 0.94 | 0.92 | 23.33  | 6.62 |
| Q80SW1 | Putative adenosylhomocysteinase 2 OS=Mus musculus GN=Ahcy1 PE=1 SV=1 - [SAHH2_MOUSE]                                 | 37.36 | 3 | 10 | 21 | 121 | 0.96 | 1.02 | 1.02 | 1.04 | 1.07 | 0.96 | 0.97 | 0.94 | 0.98 | 0.94 | 0.96 | 0.92 | 0.98 | 58.91  | 6.89 |
| P28652 | Calcium/calmodulin-dependent protein kinase type II subunit beta OS=Mus musculus GN=Camk2b PE=1 SV=2 - [KCC2B_MOUSE] | 43.17 | 9 | 11 | 18 | 139 | 0.98 | 0.90 | 0.89 | 1.15 | 1.19 | 0.91 | 0.92 | 0.94 | 0.90 | 1.00 | 1.02 | 1.04 | 1.06 | 60.42  | 7.28 |
| F8WHK3 | cAMP and cAMP-inhibited cGMP 3',5'-cyclic phosphodiesterase 10A OS=Mus musculus GN=Pde10a PE=4 SV=1 - [F8WHK3_MOUSE] | 16.48 | 6 | 9  | 9  | 17  | 1.20 | 1.51 | 1.25 | 1.52 | 1.29 | 1.13 | 0.97 | 0.94 | 0.76 | 1.29 | 1.17 | 1.65 | 1.40 | 81.17  | 6.76 |



|          |                                                                                                                             |       |   |    |    |    |      |      |      |      |      |      |      |      |      |      |      |      |      |        |      |
|----------|-----------------------------------------------------------------------------------------------------------------------------|-------|---|----|----|----|------|------|------|------|------|------|------|------|------|------|------|------|------|--------|------|
| A2AIR7   | Voltage-dependent N-type calcium channel subunit alpha-1B<br>OS=Mus musculus<br>GN=Cacna1b PE=3<br>SV=1 -<br>[A2AIR7_MOUSE] | 8.51  | 7 | 14 | 15 | 39 | 1.04 | 1.20 | 1.25 | 1.16 | 1.10 | 1.01 | 0.92 | 0.94 | 0.92 | 1.05 | 0.96 | 0.97 | 0.96 | 261.39 | 8.59 |
| Q8BM92   | Cadherin-7 OS=Mus musculus<br>GN=Cdh7<br>PE=2 SV=1 -<br>[CADH7_MOUSE]                                                       | 3.82  | 1 | 1  | 2  | 5  | 1.18 | 1.12 | 1.04 | 1.13 | 0.96 | 1.16 | 0.98 | 0.94 | 0.80 | 0.82 | 0.70 | 0.78 | 0.66 | 87.15  | 4.82 |
| Q91Z31   | Polypyrimidine tract-binding protein 2<br>OS=Mus musculus<br>GN=Ptbp2 PE=1 SV=2<br>-[PTBP2_MOUSE]                           | 24.29 | 2 | 6  | 6  | 15 | 0.99 | 0.76 | 0.77 | 1.03 | 0.92 | 0.92 | 1.12 | 0.94 | 1.00 | 1.03 | 0.94 | 0.97 | 0.95 | 57.45  | 8.66 |
| Q8BTG3   | T-complex protein 11-like protein 1 OS=Mus musculus<br>GN=Tepl111<br>PE=2 SV=1 -<br>[T11L1_MOUSE]                           | 6.09  | 1 | 2  | 3  | 5  | 1.08 | 0.98 | 0.91 | 1.15 | 1.07 | 1.06 | 0.98 | 0.94 | 0.87 | 1.14 | 1.06 | 1.17 | 1.09 | 56.30  | 5.50 |
| Q91V36   | Nuclear receptor-binding protein 2<br>OS=Mus musculus<br>GN=Nrbp2 PE=1<br>SV=2 -<br>[NRBP2_MOUSE]                           | 4.61  | 1 | 2  | 2  | 4  | 1.12 | 0.86 | 0.76 | 0.86 | 0.88 | 1.01 | 0.90 | 0.94 | 0.84 | 1.12 | 0.98 | 0.99 | 0.94 | 57.31  | 6.35 |
| Q8JZP2   | Synapsin-3 OS=Mus musculus<br>GN=Syn3<br>PE=1 SV=2 -<br>[SYN3_MOUSE]                                                        | 35.92 | 2 | 11 | 12 | 48 | 1.02 | 1.02 | 0.99 | 1.00 | 1.01 | 0.95 | 0.97 | 0.94 | 0.94 | 0.94 | 0.98 | 0.96 | 1.02 | 63.27  | 9.38 |
| Q6ZPF3-3 | Isoform 3 of T-lymphoma invasion and metastasis-inducing protein 2<br>OS=Mus musculus<br>GN=Tiamp2 -<br>[TIAM2_MOUSE]       | 11.31 | 3 | 4  | 4  | 14 | 1.14 | 0.86 | 0.86 | 0.95 | 0.91 | 1.02 | 0.97 | 0.94 | 0.95 | 1.04 | 0.96 | 0.91 | 0.89 | 70.10  | 6.33 |
| P28665   | Murinoglobulin-1 OS=Mus musculus<br>GN=Mug1 PE=1<br>SV=3 -<br>[MUG1_MOUSE]                                                  | 4.81  | 2 | 4  | 4  | 10 | 0.82 | 1.10 | 1.23 | 0.65 | 0.76 | 0.87 | 1.01 | 0.94 | 1.08 | 0.94 | 1.04 | 0.68 | 0.80 | 165.19 | 6.42 |
| E9PUD2   | Dynamitin-1-like protein OS=Mus musculus<br>GN=Dnm11 PE=2<br>SV=1 -<br>[E9PUD2_MOUSE]                                       | 55.06 | 1 | 2  | 33 | 96 | 0.92 | 0.93 | 0.97 | 1.14 | 1.23 | 0.99 | 1.06 | 0.94 | 0.96 | 0.97 | 1.07 | 0.98 | 1.02 | 79.48  | 7.08 |
| P62812   | Gamma-aminobutyric acid receptor subunit alpha-1 OS=Mus musculus<br>GN=Gabra1<br>PE=1 SV=1 -<br>[GBRA1_MOUSE]               | 27.47 | 2 | 8  | 12 | 57 | 0.98 | 0.99 | 1.04 | 1.11 | 1.10 | 0.86 | 0.85 | 0.94 | 0.96 | 0.94 | 0.95 | 0.96 | 1.00 | 51.72  | 9.31 |
| Q9DB72   | BTB/POZ domain-containing protein 17 OS=Mus musculus<br>GN=Btd17 PE=2<br>SV=1 -<br>[BTBDH_MOUSE]                            | 19.87 | 1 | 7  | 7  | 15 | 1.01 | 1.10 | 1.04 | 1.08 | 1.13 | 0.86 | 0.97 | 0.94 | 0.92 | 0.90 | 0.95 | 0.93 | 1.01 | 52.57  | 9.42 |
| Q6P069-2 | Isoform 2 of Sorcin OS=Mus musculus<br>GN=Sri -<br>[SORCN_MOUSE]                                                            | 28.96 | 2 | 6  | 6  | 17 | 0.94 | 0.77 | 0.86 | 0.93 | 1.02 | 0.93 | 0.99 | 0.94 | 1.05 | 0.92 | 1.03 | 0.93 | 1.00 | 20.28  | 5.34 |

|        |                                                                                                                         |       |   |    |    |    |      |      |      |      |      |      |      |      |      |      |      |      |      |        |       |
|--------|-------------------------------------------------------------------------------------------------------------------------|-------|---|----|----|----|------|------|------|------|------|------|------|------|------|------|------|------|------|--------|-------|
| Q8R066 | Complement C1q tumor necrosis factor-related protein 4<br>OS=Mus musculus<br>GN=C1qtnf4 PE=2<br>SV=1 -<br>[C1QT4_MOUSE] | 7.98  | 1 | 2  | 2  | 4  | 1.14 | 1.11 | 0.98 | 1.04 | 0.91 | 0.90 | 0.79 | 0.94 | 0.83 | 1.07 | 0.95 | 0.96 | 0.85 | 35.04  | 8.98  |
| Q91YR7 | Pre-mRNA-processing factor 6<br>OS=Mus musculus<br>GN=Prpf6 PE=2<br>SV=1 -<br>[PRP6_MOUSE]                              | 5.84  | 2 | 5  | 5  | 11 | 1.03 | 1.05 | 1.15 | 0.95 | 1.04 | 0.90 | 1.00 | 0.94 | 1.02 | 1.01 | 1.11 | 1.08 | 1.14 | 106.65 | 8.09  |
| Q99J08 | SEC14-like protein 2<br>OS=Mus musculus<br>GN=Sec14l2 PE=2<br>SV=1 -<br>[S14L2_MOUSE]                                   | 16.87 | 1 | 5  | 5  | 15 | 0.96 | 1.15 | 1.10 | 1.09 | 1.16 | 0.96 | 1.04 | 0.94 | 0.98 | 0.93 | 1.03 | 1.06 | 1.17 | 46.27  | 7.11  |
| Q8C0L0 | Thioredoxin-related transmembrane protein 4<br>OS=Mus musculus<br>GN=Tmx4 PE=1<br>SV=2 -<br>[TMX4_MOUSE]                | 20.60 | 3 | 5  | 5  | 18 | 0.96 | 1.11 | 1.11 | 1.14 | 1.12 | 1.01 | 0.97 | 0.94 | 0.92 | 1.09 | 0.91 | 0.97 | 0.96 | 37.11  | 4.37  |
| Q6PGH0 | Ubiquitin domain-containing protein 2<br>OS=Mus musculus<br>GN=Ubt2 PE=2<br>SV=1 -<br>[UBTD2_MOUSE]                     | 27.78 | 2 | 4  | 4  | 13 | 0.98 | 1.24 | 1.18 | 1.00 | 1.06 | 1.06 | 1.07 | 0.94 | 0.97 | 0.92 | 0.96 | 0.93 | 0.91 | 26.13  | 5.83  |
| E9Q7L0 | Protein Ogdhl<br>OS=Mus musculus<br>GN=Ogdhl PE=2<br>SV=1 -<br>[E9Q7L0_MOUSE]                                           | 38.68 | 1 | 24 | 30 | 79 | 0.95 | 1.06 | 1.04 | 1.09 | 1.09 | 0.93 | 0.96 | 0.94 | 0.98 | 0.92 | 1.01 | 0.99 | 1.01 | 116.53 | 6.84  |
| Q99N87 | 28S ribosomal protein S5, mitochondrial<br>OS=Mus musculus<br>GN=Mtpps5 PE=2<br>SV=1 -<br>[RT05_MOUSE]                  | 12.04 | 2 | 5  | 5  | 8  | 0.98 | 0.94 | 0.95 | 1.03 | 1.01 | 0.95 | 0.97 | 0.94 | 0.94 | 0.92 | 0.91 | 0.98 | 1.00 | 48.18  | 10.14 |
| Q9CQ79 | Thioredoxin domain-containing protein 9<br>OS=Mus musculus<br>GN=Txnd9 PE=1<br>SV=1 -<br>[TXND9_MOUSE]                  | 18.14 | 1 | 4  | 4  | 6  | 0.97 | 0.81 | 0.91 | 0.73 | 0.80 | 0.89 | 0.99 | 0.94 | 1.02 | 0.79 | 0.82 | 0.77 | 0.78 | 26.24  | 5.95  |
| Q8VHN8 | Protein syndesmos<br>OS=Mus musculus<br>GN=Nudt16l1 PE=1<br>SV=2 -<br>[SDOS_MOUSE]                                      | 9.95  | 4 | 1  | 2  | 3  | 1.13 | 1.28 | 1.13 | 0.83 | 0.73 | 0.96 | 0.84 | 0.94 | 0.83 | 0.98 | 0.87 | 1.01 | 0.89 | 23.40  | 9.26  |
| Q9Z2W1 | Serine/threonine-protein kinase 25<br>OS=Mus musculus<br>GN=Stk25 PE=1<br>SV=2 -<br>[STK25_MOUSE]                       | 18.08 | 2 | 2  | 6  | 11 | 0.97 | 0.79 | 0.81 | 0.97 | 0.99 | 0.99 | 1.01 | 0.94 | 0.97 | 1.02 | 1.05 | 0.99 | 1.02 | 48.13  | 6.81  |
| Q9EP72 | ER membrane protein complex subunit 7<br>OS=Mus musculus<br>GN=Emc7 PE=2<br>SV=1 -<br>[EMC7_MOUSE]                      | 6.64  | 1 | 1  | 1  | 1  | 1.08 | 0.83 | 0.77 | 1.08 | 1.00 | 0.94 | 0.87 | 0.94 | 0.87 | 1.04 | 0.96 | 1.01 | 0.94 | 26.29  | 9.23  |
| P52196 | Thiosulfate sulfurtransferase<br>OS=Mus musculus<br>GN=Tst PE=1<br>SV=3 -<br>[THTR_MOUSE]                               | 28.28 | 1 | 7  | 7  | 11 | 0.93 | 0.78 | 0.90 | 0.95 | 1.05 | 0.88 | 1.10 | 0.94 | 0.93 | 0.88 | 0.91 | 0.95 | 1.10 | 33.44  | 7.85  |

|          |                                                                                                                          |       |   |    |    |     |      |      |      |      |      |      |      |      |      |      |      |      |      |       |      |
|----------|--------------------------------------------------------------------------------------------------------------------------|-------|---|----|----|-----|------|------|------|------|------|------|------|------|------|------|------|------|------|-------|------|
| Q8BP40   | Lysophosphatidic acid phosphatase type 6<br>OS=Mus musculus<br>GN=Acp6 PE=2 SV=1<br>-[PPA6_MOUSE]                        | 11.72 | 1 | 3  | 3  | 6   | 0.97 | 1.03 | 1.09 | 1.03 | 1.05 | 0.89 | 0.93 | 0.94 | 0.98 | 1.00 | 1.06 | 1.02 | 0.97 | 47.59 | 7.72 |
| Q9QYC0   | Alpha-adducin<br>OS=Mus musculus<br>GN=Add1 PE=1 SV=2<br>-[ADDA_MOUSE]                                                   | 47.35 | 4 | 2  | 26 | 231 | 1.15 | 0.94 | 0.80 | 0.85 | 0.80 | 1.09 | 1.15 | 0.94 | 1.05 | 1.05 | 0.96 | 1.18 | 0.76 | 80.60 | 5.90 |
| Q3ZK22-5 | Isoform 3 of Vezatin<br>OS=Mus musculus<br>GN=Vezt -<br>-[VEZA_MOUSE]                                                    | 2.76  | 4 | 1  | 1  | 2   | 1.17 | 1.50 | 1.27 | 1.46 | 1.24 | 1.02 | 0.86 | 0.94 | 0.80 | 1.12 | 0.96 | 1.23 | 1.05 | 70.65 | 6.19 |
| Q9DC15   | NADH dehydrogenase [ubiquinone] 1 alpha subcomplex subunit 8<br>OS=Mus musculus<br>GN=Ndufa8 PE=1 SV=3<br>-[NDUA8_MOUSE] | 43.02 | 1 | 6  | 6  | 39  | 0.86 | 0.78 | 0.82 | 0.83 | 0.94 | 0.90 | 1.01 | 0.94 | 1.10 | 0.85 | 1.01 | 0.87 | 1.02 | 19.98 | 8.46 |
| O89053   | Coronin-1A<br>OS=Mus musculus<br>GN=Coro1a PE=1 SV=5<br>-[COR1A_MOUSE]                                                   | 41.21 | 4 | 4  | 17 | 47  | 0.91 | 0.91 | 1.06 | 1.13 | 1.21 | 0.77 | 0.93 | 0.94 | 1.03 | 0.95 | 1.04 | 0.80 | 0.91 | 50.96 | 6.48 |
| Q9WVA3   | Mitotic checkpoint protein BUB3<br>OS=Mus musculus<br>GN=Bub3 PE=2 SV=2<br>-[BUB3_MOUSE]                                 | 21.47 | 1 | 6  | 6  | 13  | 1.00 | 1.22 | 1.15 | 0.97 | 0.93 | 0.89 | 0.84 | 0.94 | 0.94 | 0.97 | 0.99 | 1.08 | 1.08 | 36.93 | 6.84 |
| Q99JF5   | Diphosphomevalonate decarboxylase<br>OS=Mus musculus<br>GN=Mvd PE=1 SV=2<br>-[MVD1_MOUSE]                                | 12.47 | 1 | 2  | 2  | 8   | 1.02 | 1.06 | 1.04 | 0.93 | 0.91 | 0.85 | 0.90 | 0.94 | 0.92 | 1.05 | 1.27 | 1.06 | 1.03 | 44.04 | 6.30 |
| P48722   | Heat shock 70 kDa protein 4L<br>OS=Mus musculus<br>GN=Hspa4l PE=1 SV=2<br>-[HS74L_MOUSE]                                 | 55.61 | 5 | 36 | 39 | 123 | 0.97 | 0.98 | 0.94 | 1.04 | 1.06 | 0.95 | 0.96 | 0.94 | 0.95 | 0.94 | 0.95 | 0.98 | 0.98 | 94.32 | 5.74 |
| O70374-2 | Isoform 2 of Protein CBFA2T2<br>OS=Mus musculus<br>GN=Cbfa2t2<br>-[MTG8R_MOUSE]                                          | 2.79  | 5 | 2  | 2  | 3   | 0.92 | 1.18 | 1.27 | 0.79 | 0.86 | 1.17 | 1.26 | 0.94 | 1.02 | 1.04 | 1.13 | 0.89 | 0.97 | 63.88 | 7.69 |
| Q3UYG8   | O-acetyl-ADP-ribose deacetylase<br>MACROD2<br>OS=Mus musculus<br>GN=Macrod2 PE=2 SV=1<br>-[MACD2_MOUSE]                  | 10.53 | 3 | 5  | 5  | 11  | 1.15 | 0.89 | 0.68 | 1.14 | 0.95 | 1.07 | 0.89 | 0.94 | 0.73 | 0.96 | 0.74 | 1.20 | 0.91 | 52.11 | 4.75 |
| Q8BPA8-  | Isoform 2 of Protein DPCD<br>OS=Mus musculus<br>GN=Dpcd -<br>-[DPCD_MOUSE]                                               | 8.04  | 2 | 1  | 1  | 1   | 1.01 | 0.79 | 0.78 | 1.03 | 1.01 | 1.00 | 0.98 | 0.94 | 0.93 | 1.00 | 0.99 | 0.91 | 0.90 | 12.38 | 6.16 |
| D3Z451   | MCG54087<br>OS=Mus musculus<br>GN=Serpina3j PE=3 SV=1<br>-[D3Z451_MOUSE]                                                 | 6.67  | 1 | 1  | 1  | 1   | 0.93 | 1.25 | 1.34 | 0.98 | 1.06 | 0.85 | 0.91 | 0.94 | 1.02 | 0.82 | 0.89 | 1.12 | 1.21 | 47.33 | 7.50 |

|          |                                                                                                           |       |   |    |    |     |      |      |      |      |      |      |      |      |      |      |      |      |      |        |      |
|----------|-----------------------------------------------------------------------------------------------------------|-------|---|----|----|-----|------|------|------|------|------|------|------|------|------|------|------|------|------|--------|------|
| A6X940   | Fermitin family homolog 2 (Fragment)<br>OS=Mus musculus<br>GN=Ferm2 PE=2<br>SV=1 -<br>[A6X940_MOUSE]      | 8.14  | 1 | 1  | 2  | 4   | 1.00 | 0.79 | 0.79 | 1.04 | 1.04 | 0.90 | 0.89 | 0.94 | 0.94 | 0.98 | 0.98 | 0.90 | 0.90 | 28.89  | 8.65 |
| Q922D8   | C-1-tetrahydrofolate synthase, cytoplasmic<br>OS=Mus musculus<br>GN=Mthfd1 PE=1<br>SV=4 -<br>[C1TC_MOUSE] | 22.99 | 1 | 16 | 16 | 36  | 1.04 | 1.05 | 1.05 | 1.07 | 1.04 | 0.92 | 0.92 | 0.94 | 0.92 | 0.94 | 0.97 | 1.01 | 1.02 | 101.14 | 7.14 |
| Q811Q9-2 | Isoform 2 of Choline-phosphate cytidyltransferase B<br>OS=Mus musculus<br>GN=Pcyt1b -<br>[PCY1B_MOUSE]    | 10.32 | 2 | 2  | 3  | 6   | 0.92 | 1.02 | 1.11 | 1.00 | 1.09 | 1.13 | 1.22 | 0.94 | 1.03 | 0.88 | 0.96 | 0.95 | 1.04 | 38.74  | 7.55 |
| Q01853   | Transitional endoplasmic reticulum ATPase OS=Mus musculus GN=Vep PE=1 SV=4 -<br>[TERA_MOUSE]              | 74.94 | 9 | 44 | 45 | 352 | 0.98 | 1.02 | 1.06 | 1.01 | 1.05 | 0.97 | 0.98 | 0.94 | 0.99 | 0.94 | 0.99 | 0.97 | 1.00 | 89.27  | 5.26 |
| Q811U4   | Mitofusin-1 OS=Mus musculus GN=Mfn1 PE=1 SV=3 -<br>[MFN1_MOUSE]                                           | 2.43  | 1 | 1  | 1  | 2   | 1.05 | 1.25 | 1.19 | 1.33 | 1.27 | 0.78 | 0.74 | 0.94 | 0.90 | 0.90 | 0.86 | 1.03 | 0.98 | 83.67  | 6.51 |
| P24638   | Lysosomal acid phosphatase OS=Mus musculus GN=Acp2 PE=2 SV=2 -<br>[PPAL_MOUSE]                            | 1.89  | 1 | 1  | 1  | 2   | 1.03 | 0.91 | 0.88 | 1.03 | 0.99 | 1.04 | 1.01 | 0.94 | 0.91 | 0.92 | 0.89 | 0.88 | 0.85 | 48.48  | 7.02 |
| Q8CIQ7   | Dedicator of cytokinesis protein 3 OS=Mus musculus GN=Dock3 PE=1 SV=1 -<br>[DOCK3_MOUSE]                  | 6.02  | 3 | 7  | 8  | 26  | 0.92 | 1.06 | 1.00 | 1.00 | 0.97 | 0.98 | 1.02 | 0.95 | 0.96 | 0.95 | 0.92 | 1.02 | 1.01 | 232.76 | 6.99 |
| Q61553   | Fascin OS=Mus musculus GN=Fscn1 PE=1 SV=4 -<br>[FSCN1_MOUSE]                                              | 56.19 | 5 | 23 | 23 | 95  | 0.99 | 0.98 | 1.01 | 1.06 | 1.08 | 0.95 | 0.93 | 0.95 | 0.97 | 0.94 | 0.95 | 0.98 | 1.08 | 54.47  | 6.89 |
| Q6PHU5   | Sortilin OS=Mus musculus GN=Sort1 PE=1 SV=1 -<br>[SORT_MOUSE]                                             | 15.15 | 3 | 9  | 9  | 24  | 0.95 | 0.95 | 1.05 | 1.02 | 1.04 | 0.94 | 1.08 | 0.95 | 0.99 | 0.93 | 0.96 | 0.92 | 0.98 | 91.14  | 5.88 |
| Q60737   | Casein kinase II subunit alpha OS=Mus musculus GN=Csnk2a1 PE=1 SV=2 -<br>[CSK21_MOUSE]                    | 48.34 | 3 | 14 | 14 | 63  | 0.98 | 0.95 | 0.92 | 1.11 | 1.11 | 0.95 | 0.98 | 0.95 | 0.99 | 0.91 | 0.95 | 1.03 | 0.98 | 45.10  | 7.74 |
| Q9WVK4   | EH domain-containing protein 1 OS=Mus musculus GN=Ehd1 PE=1 SV=1 -<br>[EHD1_MOUSE]                        | 58.99 | 1 | 12 | 22 | 64  | 0.94 | 0.93 | 0.99 | 1.04 | 1.18 | 0.90 | 1.06 | 0.95 | 1.03 | 0.98 | 1.16 | 1.03 | 1.11 | 60.56  | 6.83 |
| P59016   | Vacuolar protein sorting-associated protein 33B OS=Mus musculus GN=Vps33b PE=1 SV=1 -<br>[VP33B_MOUSE]    | 7.62  | 1 | 4  | 4  | 5   | 1.04 | 1.10 | 1.08 | 1.13 | 1.16 | 1.08 | 0.84 | 0.95 | 0.91 | 0.92 | 1.00 | 1.27 | 1.09 | 70.48  | 6.86 |

|        |                                                                                                                                  |       |   |    |    |     |      |      |      |      |      |      |      |      |      |      |      |      |      |        |       |      |
|--------|----------------------------------------------------------------------------------------------------------------------------------|-------|---|----|----|-----|------|------|------|------|------|------|------|------|------|------|------|------|------|--------|-------|------|
| G3X8V3 | Phosphatidylethanolamine-binding protein 4<br>OS=Mus musculus<br>GN=Pebp4 PE=4<br>SV=1 -<br>[G3X8V3_MOUSE]                       | 3.31  | 2 | 1  | 1  | 1   | 1    | 0.79 | 1.19 | 1.50 | 1.11 | 1.40 | 1.17 | 1.47 | 0.95 | 1.19 | 0.84 | 1.06 | 1.01 | 1.28   | 26.84 | 5.48 |
| Q8BZA9 | Fructose-2,6-bisphosphatase TIGAR<br>OS=Mus musculus<br>GN=Tigar PE=2 SV=1<br>-[TIGAR_MOUSE]                                     | 15.24 | 1 | 2  | 2  | 7   | 0.98 | 0.88 | 0.82 | 1.10 | 1.03 | 0.97 | 1.02 | 0.95 | 0.90 | 0.89 | 1.12 | 1.09 | 1.16 | 29.17  | 8.18  |      |
| Q91XY0 | MCG133388, isoform<br>CRA_m OS=Mus musculus<br>GN=Pcdhga8 PE=2<br>SV=1 -<br>[Q91XY0_MOUSE]                                       | 7.51  | 9 | 3  | 5  | 18  | 1.01 | 1.08 | 1.12 | 0.98 | 0.97 | 1.00 | 0.99 | 0.95 | 0.90 | 1.01 | 1.00 | 0.96 | 1.00 | 101.41 | 5.11  |      |
| Q9CRD2 | ER membrane protein complex subunit 2<br>OS=Mus musculus<br>GN=Emc2 PE=2 SV=1<br>-[EMC2_MOUSE]                                   | 14.81 | 1 | 4  | 4  | 10  | 0.91 | 1.00 | 1.28 | 0.96 | 1.08 | 0.85 | 0.96 | 0.95 | 1.04 | 0.85 | 0.99 | 0.93 | 1.04 | 34.91  | 6.81  |      |
| D3Z568 | NADH dehydrogenase (Ubiquinone) 1 beta subcomplex, 5, isoform<br>CRA_e OS=Mus musculus<br>GN=Ndub5 PE=4 SV=1 -<br>[D3Z568_MOUSE] | 17.65 | 2 | 3  | 3  | 15  | 1.03 | 1.05 | 0.97 | 1.22 | 1.18 | 0.91 | 0.89 | 0.95 | 0.99 | 1.06 | 1.00 | 0.89 | 0.91 | 14.03  | 5.54  |      |
| Q9D2V7 | Coronin-7 OS=Mus musculus<br>GN=Coro7 PE=2 SV=2 -<br>[CORO7_MOUSE]                                                               | 24.95 | 3 | 16 | 16 | 33  | 1.02 | 1.13 | 1.12 | 1.07 | 1.08 | 0.96 | 0.93 | 0.95 | 0.90 | 0.99 | 0.98 | 0.96 | 0.96 | 100.75 | 5.77  |      |
| Q9DB05 | Alpha-soluble NSF attachment protein<br>OS=Mus musculus<br>GN=Napa PE=1 SV=1<br>-[SNAA_MOUSE]                                    | 74.24 | 1 | 15 | 18 | 134 | 0.95 | 1.09 | 1.15 | 1.04 | 1.10 | 0.96 | 0.97 | 0.95 | 1.00 | 0.96 | 1.04 | 1.03 | 1.08 | 33.17  | 5.45  |      |
| P58854 | Gamma-tubulin complex component 3<br>OS=Mus musculus<br>GN=Tubgcp3 PE=2<br>SV=2 -<br>[GCP3_MOUSE]                                | 0.88  | 1 | 1  | 1  | 2   | 0.93 | 1.19 | 1.27 | 1.16 | 1.24 | 0.91 | 0.97 | 0.95 | 1.01 | 1.00 | 1.07 | 1.13 | 1.21 | 103.40 | 8.32  |      |
| Q07417 | Short-chain specific acyl-CoA dehydrogenase, mitochondrial<br>OS=Mus musculus<br>GN=Acads PE=2 SV=2 -<br>[ACADS_MOUSE]           | 12.38 | 2 | 4  | 4  | 7   | 0.98 | 0.91 | 0.87 | 1.06 | 1.10 | 0.83 | 0.92 | 0.95 | 0.93 | 0.94 | 0.93 | 0.97 | 1.07 | 44.86  | 8.47  |      |
| E9QNX9 | Tyrosine-protein kinase receptor<br>OS=Mus musculus<br>GN=Igf1r PE=2 SV=1 -<br>[E9QNX9_MOUSE]                                    | 5.92  | 2 | 5  | 6  | 9   | 0.94 | 1.18 | 1.24 | 1.01 | 1.03 | 0.93 | 0.99 | 0.95 | 1.01 | 0.95 | 1.01 | 0.93 | 1.00 | 155.19 | 5.83  |      |
| Q9JHW4 | Selenocysteine-specific elongation factor<br>OS=Mus musculus<br>GN=Eefsec PE=2<br>SV=2 -<br>[SELB_MOUSE]                         | 2.74  | 1 | 1  | 1  | 4   | 0.86 | 1.39 | 1.61 | 0.69 | 0.80 | 1.04 | 1.20 | 0.95 | 1.10 | 0.97 | 1.14 | 1.20 | 1.40 | 63.50  | 8.29  |      |

|        |                                                                                                                |       |    |    |    |     |      |      |      |      |      |      |      |      |      |      |      |      |      |       |      |
|--------|----------------------------------------------------------------------------------------------------------------|-------|----|----|----|-----|------|------|------|------|------|------|------|------|------|------|------|------|------|-------|------|
| Q9DJ11 | Adaptin ear-binding coat-associated protein 2 OS=Mus musculus GN=Necap2 PE=1 SV=1 - [NECP2_MOUSE]              | 17.29 | 2  | 3  | 4  | 8   | 0.99 | 1.02 | 0.97 | 0.98 | 0.95 | 0.88 | 0.86 | 0.95 | 0.92 | 0.83 | 0.84 | 0.96 | 0.93 | 28.58 | 7.94 |
| A2A9X5 | 5(3')-deoxyribonucleotidase, cytosolic type OS=Mus musculus GN=Nt5c PE=2 SV=1 - [A2A9X5_MOUSE]                 | 40.21 | 1  | 1  | 6  | 25  | 0.89 | 0.88 | 1.00 | 0.93 | 0.92 | 1.00 | 1.18 | 0.95 | 0.96 | 0.87 | 1.05 | 1.05 | 1.02 | 21.93 | 5.33 |
| E9PVS5 | Mitochondrial inner membrane protein (Fragment) OS=Mus musculus GN=Immt PE=2 SV=1 - [E9PVS5_MOUSE]             | 48.94 | 1  | 3  | 8  | 22  | 1.05 | 1.02 | 0.98 | 1.02 | 0.96 | 0.82 | 0.81 | 0.95 | 0.90 | 0.89 | 1.01 | 1.03 | 0.99 | 19.66 | 9.09 |
| P53810 | Phosphatidylinositol transfer protein alpha isoform OS=Mus musculus GN=Pitpna PE=1 SV=2 - [PIPNA_MOUSE]        | 59.78 | 4  | 13 | 15 | 61  | 0.95 | 0.93 | 0.99 | 1.01 | 1.04 | 0.99 | 1.02 | 0.95 | 0.99 | 0.92 | 0.96 | 0.91 | 1.01 | 31.87 | 6.37 |
| Q6ZPU9 | KIF1-binding protein OS=Mus musculus GN=Kbp PE=2 SV=2 - [KBP_MOUSE]                                            | 14.42 | 6  | 6  | 6  | 10  | 1.07 | 1.12 | 1.05 | 0.98 | 0.96 | 0.87 | 0.84 | 0.95 | 0.88 | 0.94 | 0.94 | 1.00 | 0.97 | 71.01 | 5.48 |
| P10649 | Glutathione S-transferase Mu 1 OS=Mus musculus GN=Gstm1 PE=1 SV=2 - [GSTM1_MOUSE]                              | 69.27 | 10 | 12 | 16 | 97  | 1.06 | 1.00 | 0.94 | 1.05 | 0.99 | 0.99 | 0.93 | 0.95 | 0.92 | 0.99 | 0.93 | 1.11 | 1.08 | 25.95 | 7.94 |
| Q8BG39 | Synaptic vesicle glycoprotein 2B OS=Mus musculus GN=Sv2b PE=1 SV=1 - [SV2B_MOUSE]                              | 20.64 | 1  | 11 | 12 | 123 | 1.00 | 1.12 | 1.12 | 1.04 | 1.05 | 0.92 | 0.87 | 0.95 | 0.91 | 0.96 | 0.95 | 1.02 | 1.01 | 77.41 | 5.57 |
| Q80XE1 | Synembryn-B OS=Mus musculus GN=Ric8b PE=1 SV=2 - [RIC8B_MOUSE]                                                 | 1.73  | 2  | 1  | 1  | 1   | 1.04 | 1.07 | 1.02 | 1.00 | 0.95 | 0.87 | 0.83 | 0.95 | 0.90 | 0.95 | 0.91 | 0.99 | 0.95 | 58.65 | 5.72 |
| Q99MR8 | Methylcrotonoyl-CoA carboxylase subunit alpha, mitochondrial OS=Mus musculus GN=Mccc1 PE=2 SV=2 - [MCCA_MOUSE] | 12.97 | 3  | 7  | 7  | 17  | 0.96 | 1.07 | 1.06 | 1.15 | 1.19 | 1.01 | 0.99 | 0.95 | 1.02 | 1.01 | 1.05 | 0.95 | 0.99 | 79.29 | 7.83 |
| A2ALK6 | Band 4.1-like protein 4B OS=Mus musculus GN=Epb4.14b PE=2 SV=1 - [A2ALK6_MOUSE]                                | 0.89  | 1  | 1  | 1  | 1   | 1.22 | 1.02 | 0.83 | 1.01 | 0.82 | 0.94 | 0.77 | 0.95 | 0.77 | 0.96 | 0.79 | 0.91 | 0.74 | 99.72 | 9.17 |
| Q80TL0 | Protein phosphatase 1E OS=Mus musculus GN=Ppm1e PE=1 SV=2 - [PPM1E_MOUSE]                                      | 26.17 | 1  | 13 | 13 | 65  | 1.02 | 0.94 | 0.97 | 1.05 | 1.02 | 0.97 | 0.93 | 0.95 | 0.96 | 0.95 | 0.93 | 0.98 | 0.99 | 83.37 | 4.97 |
| Q9EP97 | Sentrin-specific protease 3 OS=Mus musculus GN=Senp3 PE=1 SV=1 - [SENP3_MOUSE]                                 | 3.17  | 1  | 1  | 1  | 2   | 0.99 | 1.31 | 1.32 | 1.07 | 1.08 | 1.01 | 1.02 | 0.95 | 0.95 | 1.16 | 1.17 | 1.18 | 1.20 | 64.36 | 8.75 |

|        |                                                                                                                             |       |    |    |    |     |      |      |      |      |      |      |      |      |      |      |      |      |      |        |       |
|--------|-----------------------------------------------------------------------------------------------------------------------------|-------|----|----|----|-----|------|------|------|------|------|------|------|------|------|------|------|------|------|--------|-------|
| Q8R502 | Leucine-rich repeat-containing protein 8C<br>OS=Mus musculus<br>GN=Lrc8c PE=1<br>SV=1 -<br>[LRC8C_MOUSE]                    | 5.48  | 1  | 3  | 3  | 8   | 0.94 | 1.03 | 1.14 | 1.14 | 1.16 | 0.86 | 0.94 | 0.95 | 0.99 | 0.92 | 1.03 | 0.97 | 1.09 | 92.31  | 7.81  |
| Q99JY0 | Trifunctional enzyme subunit beta, mitochondrial<br>OS=Mus musculus<br>GN=Hadhb PE=1<br>SV=1 -<br>[ECHB_MOUSE]              | 35.16 | 2  | 13 | 13 | 30  | 1.00 | 0.95 | 1.02 | 1.07 | 1.05 | 0.93 | 0.95 | 0.95 | 0.94 | 1.01 | 1.02 | 1.02 | 1.05 | 51.35  | 9.38  |
| Q91Y86 | Mitogen-activated protein kinase 8<br>OS=Mus musculus<br>GN=Mapk8 PE=1<br>SV=1 -<br>[MK08_MOUSE]                            | 31.25 | 16 | 4  | 10 | 16  | 0.97 | 0.89 | 0.89 | 0.96 | 0.83 | 0.96 | 1.02 | 0.95 | 0.99 | 0.78 | 0.81 | 0.80 | 0.80 | 44.20  | 7.69  |
| P17665 | Cytochrome c oxidase subunit 7C, mitochondrial<br>OS=Mus musculus<br>GN=Cox7c PE=1<br>SV=1 -<br>[COX7C_MOUSE]               | 61.90 | 3  | 3  | 3  | 12  | 1.03 | 0.78 | 0.75 | 0.97 | 0.95 | 1.07 | 1.03 | 0.95 | 0.94 | 1.01 | 0.91 | 0.95 | 0.92 | 7.33   | 11.00 |
| P40336 | Vacuolar protein sorting-associated protein 26A<br>OS=Mus musculus<br>GN=Vps26a PE=2<br>SV=1 -<br>[VP26A_MOUSE]             | 31.19 | 2  | 7  | 7  | 25  | 0.93 | 1.04 | 1.19 | 1.02 | 1.04 | 0.97 | 1.02 | 0.95 | 0.87 | 0.94 | 1.05 | 1.01 | 1.04 | 38.09  | 6.57  |
| E9Q828 | Protein Atp2b4<br>OS=Mus musculus<br>GN=Atp2b4 PE=2<br>SV=1 -<br>[E9Q828_MOUSE]                                             | 34.30 | 4  | 22 | 32 | 161 | 1.06 | 1.12 | 1.05 | 1.12 | 1.02 | 0.92 | 0.86 | 0.95 | 0.85 | 0.99 | 0.91 | 1.01 | 0.99 | 129.17 | 6.73  |
| Q55U72 | E3 ubiquitin [ISG15] ligase TRIM25<br>OS=Mus musculus<br>GN=Trim25 PE=2<br>SV=1 -<br>[Q55U72_MOUSE]                         | 2.84  | 3  | 1  | 1  | 2   | 0.93 | 1.05 | 1.12 | 0.92 | 0.99 | 0.85 | 0.91 | 0.95 | 1.02 | 0.99 | 1.07 | 1.07 | 1.15 | 44.13  | 7.87  |
| Q8BG18 | N-terminal EF-hand calcium-binding protein 1<br>OS=Mus musculus<br>GN=Necab1 PE=1<br>SV=1 -<br>[NECA1_MOUSE]                | 24.72 | 1  | 5  | 5  | 13  | 1.00 | 0.86 | 0.87 | 1.09 | 1.11 | 0.97 | 0.98 | 0.95 | 0.94 | 0.89 | 0.90 | 0.98 | 1.01 | 40.91  | 4.89  |
| A2RSX9 | Arfp1 protein<br>OS=Mus musculus<br>GN=Arfp1 PE=2<br>SV=1 -<br>[A2RSX9_MOUSE]                                               | 3.23  | 3  | 1  | 1  | 3   | 1.31 | 1.13 | 0.86 | 0.99 | 0.75 | 1.27 | 0.96 | 0.95 | 0.78 | 1.34 | 1.02 | 1.07 | 0.89 | 38.39  | 6.61  |
| Q9CQC7 | NADH dehydrogenase [ubiquinone] 1 beta subcomplex subunit 4<br>OS=Mus musculus<br>GN=Ndufb4 PE=1<br>SV=3 -<br>[NDUB4_MOUSE] | 49.61 | 1  | 5  | 5  | 16  | 1.07 | 0.94 | 1.01 | 1.11 | 1.04 | 0.98 | 0.99 | 0.95 | 0.96 | 0.94 | 0.95 | 0.99 | 0.97 | 15.07  | 9.89  |
| Q7TSH8 | Uncharacterized protein KIAA0195<br>OS=Mus musculus<br>GN=Kiaa0195 PE=1<br>SV=1 -<br>[K0195_MOUSE]                          | 1.62  | 1  | 2  | 2  | 3   | 1.07 | 1.07 | 1.00 | 1.07 | 1.00 | 0.97 | 0.90 | 0.95 | 0.88 | 0.94 | 0.88 | 1.00 | 0.94 | 151.70 | 6.46  |

|          |                                                                                                        |       |   |    |    |    |      |      |      |      |      |      |      |      |      |      |      |      |      |        |       |
|----------|--------------------------------------------------------------------------------------------------------|-------|---|----|----|----|------|------|------|------|------|------|------|------|------|------|------|------|------|--------|-------|
| P49025-3 | Isoform 3 of Citron Rho-interacting kinase OS=Mus musculus GN=Cit - [CTRO_MOUSE]                       | 26.93 | 8 | 42 | 42 | 98 | 0.98 | 1.02 | 0.99 | 1.01 | 1.02 | 0.93 | 0.92 | 0.95 | 0.96 | 0.89 | 0.91 | 0.86 | 0.87 | 183.33 | 6.61  |
| Q99LS3   | Phosphoserine phosphatase OS=Mus musculus GN=PspH PE=1 SV=1 - [SERB_MOUSE]                             | 12.89 | 3 | 3  | 3  | 6  | 0.96 | 1.11 | 1.17 | 1.09 | 1.13 | 0.95 | 1.00 | 0.95 | 1.00 | 1.02 | 1.07 | 1.05 | 1.10 | 25.08  | 6.14  |
| Q8VD62   | UPF0696 protein C11orf68 homolog OS=Mus musculus GN=Bles03 PE=2 SV=1 - [CK068_MOUSE]                   | 25.10 | 2 | 4  | 4  | 8  | 0.94 | 0.94 | 0.96 | 0.97 | 1.03 | 1.00 | 0.99 | 0.95 | 1.06 | 0.98 | 0.99 | 1.07 | 1.09 | 27.52  | 5.47  |
| P63137-2 | Isoform 2 of Gamma-aminobutyric acid receptor subunit beta-2 OS=Mus musculus GN=Gabbr2 - [GBRB2_MOUSE] | 21.52 | 3 | 3  | 7  | 17 | 1.03 | 0.98 | 1.00 | 1.12 | 1.00 | 0.86 | 0.84 | 0.95 | 0.88 | 0.91 | 0.89 | 0.82 | 0.78 | 54.60  | 9.32  |
| G8JL54   | COMM domain-containing protein 1 (Fragment) OS=Mus musculus GN=Comm1 PE=2 SV=1 - [G8JL54_MOUSE]        | 11.83 | 3 | 2  | 2  | 5  | 1.10 | 1.83 | 1.67 | 0.98 | 0.82 | 0.94 | 0.90 | 0.95 | 0.99 | 0.88 | 0.74 | 1.00 | 0.86 | 10.30  | 5.19  |
| Q3UQ44   | Ras GTPase-activating-like protein IQGAP2 OS=Mus musculus GN=Iqgap2 PE=1 SV=2 - [IQGA2_MOUSE]          | 1.46  | 1 | 2  | 2  | 5  | 1.00 | 1.09 | 1.09 | 1.07 | 1.07 | 1.10 | 1.09 | 0.95 | 0.97 | 0.94 | 0.97 | 0.95 | 0.98 | 180.42 | 5.64  |
| Q62507   | Cochlin OS=Mus musculus GN=Coch PE=2 SV=2 - [COCH_MOUSE]                                               | 2.54  | 1 | 1  | 1  | 2  | 1.11 | 0.99 | 0.88 | 1.13 | 1.01 | 0.89 | 0.79 | 0.95 | 0.85 | 0.88 | 0.79 | 1.09 | 0.98 | 59.91  | 8.44  |
| Q8K074   | Katanin p60 ATPase-containing subunit A-like 1 OS=Mus musculus GN=Katn1 PE=1 SV=1 - [KATL1_MOUSE]      | 17.83 | 7 | 6  | 6  | 12 | 0.91 | 0.85 | 0.98 | 0.96 | 1.07 | 0.99 | 1.14 | 0.95 | 1.06 | 0.99 | 1.09 | 1.04 | 1.18 | 55.13  | 7.09  |
| Q9QUR8   | Semaphorin-7A OS=Mus musculus GN=Sema7a PE=1 SV=1 - [SEM7A_MOUSE]                                      | 15.21 | 1 | 7  | 7  | 25 | 0.91 | 0.98 | 1.06 | 0.99 | 1.14 | 0.84 | 1.02 | 0.95 | 1.06 | 0.88 | 1.00 | 0.83 | 0.95 | 74.95  | 7.74  |
| P38585   | Tubulin-tyrosine ligase OS=Mus musculus GN=Ttl PE=2 SV=2 - [TTL_MOUSE]                                 | 4.77  | 1 | 1  | 1  | 3  | 0.93 | 1.32 | 1.42 | 1.51 | 1.62 | 1.17 | 1.25 | 0.95 | 1.02 | 1.10 | 1.18 | 1.17 | 1.26 | 43.11  | 6.46  |
| P62717   | 60S ribosomal protein L18a OS=Mus musculus GN=Rpl18a PE=1 SV=1 - [RL18A_MOUSE]                         | 25.57 | 2 | 5  | 5  | 12 | 1.06 | 0.98 | 0.92 | 1.10 | 1.02 | 0.99 | 0.94 | 0.95 | 0.88 | 0.96 | 0.92 | 1.09 | 1.06 | 20.72  | 10.71 |
| Q3TA40   | Protein 6430548M08Rik OS=Mus musculus GN=6430548M08Rik PE=2 SV=1 - [Q3TA40_MOUSE]                      | 40.81 | 4 | 14 | 14 | 56 | 0.95 | 0.87 | 0.92 | 0.93 | 0.99 | 0.93 | 0.97 | 0.95 | 0.99 | 0.92 | 0.95 | 0.88 | 0.91 | 45.19  | 5.07  |



|          |                                                                                                              |       |    |    |    |     |      |      |      |      |      |      |      |      |      |      |      |      |      |        |      |
|----------|--------------------------------------------------------------------------------------------------------------|-------|----|----|----|-----|------|------|------|------|------|------|------|------|------|------|------|------|------|--------|------|
| Q8BX70   | Isoform 2 of Vacuolar protein sorting-associated protein 13C<br>OS=Mus musculus<br>GN=Vps13c - [VP13C_MOUSE] | 4.28  | 4  | 10 | 13 | 24  | 1.04 | 0.83 | 0.96 | 1.11 | 1.11 | 0.94 | 0.89 | 0.95 | 0.96 | 0.96 | 0.94 | 0.93 | 1.00 | 405.57 | 6.61 |
| Q03173-6 | Isoform 6 of Protein enabled homolog<br>OS=Mus musculus<br>GN=Enah - [ENAH_MOUSE]                            | 36.88 | 10 | 15 | 15 | 44  | 0.98 | 0.80 | 0.76 | 0.91 | 0.94 | 0.96 | 0.92 | 0.95 | 0.92 | 0.86 | 0.92 | 0.83 | 0.82 | 56.32  | 6.34 |
| Q9WV34   | MAGUK p55 subfamily member 2<br>OS=Mus musculus<br>GN=Mpp2 PE=1 SV=1 - [MPP2_MOUSE]                          | 44.57 | 2  | 19 | 21 | 76  | 0.93 | 1.08 | 1.19 | 1.05 | 1.15 | 0.96 | 1.04 | 0.95 | 1.02 | 0.94 | 0.99 | 0.98 | 1.07 | 61.52  | 6.44 |
| A2A6Q8   | Myosin light chain 4 (Fragment)<br>OS=Mus musculus<br>GN=Myl4 PE=2 SV=1 - [A2A6Q8_MOUSE]                     | 60.94 | 4  | 11 | 11 | 37  | 0.85 | 0.90 | 0.96 | 0.81 | 0.95 | 1.03 | 1.20 | 0.95 | 1.18 | 0.85 | 1.08 | 0.70 | 0.82 | 21.12  | 5.03 |
| Q8BXZ1   | Protein disulfide-isomerase TMX3<br>OS=Mus musculus<br>GN=Tmx3 PE=1 SV=2 - [TMX3_MOUSE]                      | 22.15 | 1  | 7  | 7  | 18  | 1.05 | 1.02 | 0.95 | 1.19 | 1.00 | 0.99 | 0.84 | 0.95 | 0.80 | 1.03 | 0.92 | 1.08 | 0.85 | 51.82  | 5.16 |
| D3Z553   | Protein Churchill<br>OS=Mus musculus<br>GN=Churc1 PE=2 SV=1 - [D3Z553_MOUSE]                                 | 37.14 | 2  | 1  | 1  | 2   | 1.17 | 0.84 | 0.72 | 0.65 | 0.56 | 1.21 | 1.02 | 0.95 | 0.81 | 0.89 | 0.76 | 0.74 | 0.63 | 4.08   | 4.08 |
| Q8VHJ5   | Serine/threonine-protein kinase MARK1<br>OS=Mus musculus<br>GN=Mark1 PE=1 SV=2 - [MARK1_MOUSE]               | 22.64 | 1  | 8  | 14 | 36  | 0.94 | 1.12 | 1.14 | 1.01 | 1.04 | 0.95 | 1.05 | 0.95 | 1.00 | 1.02 | 1.07 | 1.00 | 1.06 | 88.28  | 9.39 |
| Q3U2G2   | Heat shock 70 kDa protein 4<br>OS=Mus musculus<br>GN=Hspa4 PE=2 SV=1 - [Q3U2G2_MOUSE]                        | 61.28 | 2  | 35 | 38 | 184 | 0.99 | 0.95 | 0.95 | 1.05 | 1.07 | 0.99 | 0.97 | 0.95 | 0.95 | 0.96 | 1.00 | 0.98 | 0.99 | 94.15  | 5.21 |
| Q9CYT6   | Adenylyl cyclase-associated protein 2<br>OS=Mus musculus<br>GN=Cap2 PE=1 SV=1 - [CAP2_MOUSE]                 | 40.76 | 2  | 17 | 17 | 54  | 0.97 | 1.08 | 1.10 | 1.06 | 1.10 | 0.93 | 0.95 | 0.95 | 0.95 | 0.95 | 1.00 | 1.01 | 1.00 | 52.83  | 6.43 |
| Q8C1Y8   | Vacuolar fusion protein CCZ1 homolog<br>OS=Mus musculus<br>GN=Ccz1 PE=1 SV=1 - [CCZ1_MOUSE]                  | 9.17  | 1  | 4  | 4  | 7   | 0.97 | 1.02 | 1.02 | 1.10 | 1.16 | 0.92 | 0.92 | 0.95 | 0.87 | 0.95 | 1.01 | 0.94 | 1.01 | 55.47  | 6.02 |
| Q8BLU0   | Fibronectin leucine rich transmembrane protein 2<br>OS=Mus musculus<br>GN=Flnt2 PE=2 SV=1 - [Q8BLU0_MOUSE]   | 3.48  | 1  | 2  | 2  | 3   | 1.00 | 1.30 | 1.29 | 1.06 | 1.06 | 0.71 | 0.70 | 0.95 | 0.94 | 0.98 | 0.98 | 1.02 | 1.01 | 73.90  | 7.91 |
| Q9R0M4   | Podocalyxin<br>OS=Mus musculus<br>GN=Podxl PE=1 SV=2 - [PODXL_MOUSE]                                         | 10.74 | 3  | 3  | 4  | 10  | 0.88 | 1.04 | 1.62 | 1.00 | 1.29 | 1.07 | 1.19 | 0.95 | 1.24 | 1.06 | 1.19 | 0.91 | 1.01 | 53.36  | 4.97 |

|        |                                                                                                                                      |       |   |    |    |     |      |      |      |      |      |      |      |      |      |      |      |      |      |        |      |
|--------|--------------------------------------------------------------------------------------------------------------------------------------|-------|---|----|----|-----|------|------|------|------|------|------|------|------|------|------|------|------|------|--------|------|
| Q9JKP5 | Muscleblind-like protein 1 OS=Mus musculus GN=Mbnl1 PE=1 SV=1 - [MBNL1_MOUSE]                                                        | 18.48 | 4 | 1  | 5  | 7   | 1.02 | 0.71 | 0.69 | 0.94 | 0.93 | 0.88 | 0.86 | 0.95 | 0.93 | 0.92 | 0.91 | 1.16 | 1.14 | 36.95  | 8.60 |
| P12658 | Calbindin OS=Mus musculus GN=Calb1 PE=1 SV=2 - [CALB1_MOUSE]                                                                         | 73.56 | 1 | 22 | 23 | 208 | 1.24 | 0.88 | 0.73 | 0.99 | 0.80 | 1.04 | 0.81 | 0.95 | 0.78 | 0.99 | 0.79 | 1.10 | 0.84 | 29.98  | 4.83 |
| Q3UR16 | Protein Zfp560 OS=Mus musculus GN=Zfp560 PE=2 SV=1 - [Q3UR16_MOUSE]                                                                  | 3.71  | 1 | 1  | 1  | 7   | 0.88 | 0.95 | 1.09 | 1.18 | 1.35 | 0.74 | 0.84 | 0.95 | 1.08 | 0.72 | 0.83 | 0.96 | 1.09 | 85.06  | 8.10 |
| K3W4Q8 | Basigin OS=Mus musculus GN=Bsg PE=4 SV=1 - [K3W4Q8_MOUSE]                                                                            | 39.91 | 4 | 7  | 7  | 44  | 1.03 | 0.94 | 0.95 | 1.02 | 1.01 | 0.98 | 0.98 | 0.95 | 0.92 | 0.93 | 0.88 | 0.90 | 0.85 | 24.10  | 5.36 |
| Q9D964 | Glycine amidinotransferase, mitochondrial OS=Mus musculus GN=Gatm PE=1 SV=1 - [GATM_MOUSE]                                           | 13.95 | 1 | 4  | 4  | 8   | 1.03 | 1.22 | 0.89 | 1.07 | 1.12 | 0.98 | 0.87 | 0.95 | 1.00 | 1.05 | 1.01 | 0.99 | 1.00 | 48.27  | 7.88 |
| Q6GQ51 | Calcium-binding mitochondrial carrier protein SCaMC-3 OS=Mus musculus GN=Slc25a23 PE=2 SV=1 - [SCMC3_MOUSE]                          | 15.20 | 2 | 5  | 5  | 8   | 1.16 | 1.53 | 1.31 | 1.36 | 1.22 | 0.91 | 0.77 | 0.95 | 0.80 | 0.98 | 0.84 | 1.04 | 1.01 | 52.46  | 7.59 |
| A2AEE7 | Cadherin EGF LAG seven-pass G-type receptor 2 OS=Mus musculus GN=Celsr2 PE=4 SV=1 - [A2AEE7_MOUSE]                                   | 4.93  | 5 | 11 | 11 | 23  | 1.00 | 1.19 | 1.20 | 1.03 | 1.01 | 0.96 | 0.99 | 0.95 | 0.99 | 1.01 | 1.01 | 0.97 | 1.01 | 316.79 | 5.47 |
| Q3UMB9 | WASH complex subunit 7 OS=Mus musculus GN=Kiaa1033 PE=2 SV=2 - [WASH7_MOUSE]                                                         | 1.62  | 1 | 2  | 2  | 3   | 0.79 | 0.71 | 0.90 | 0.79 | 1.00 | 0.78 | 0.99 | 0.95 | 1.20 | 0.72 | 0.92 | 0.61 | 0.78 | 136.28 | 7.37 |
| Q8VCK3 | Tubulin gamma-2 chain OS=Mus musculus GN=Tubg2 PE=1 SV=1 - [TBG2_MOUSE]                                                              | 22.62 | 1 | 1  | 6  | 18  | 0.83 | 0.93 | 1.12 | 0.91 | 1.10 | 0.84 | 1.00 | 0.95 | 1.14 | 0.82 | 0.99 | 1.07 | 1.29 | 51.09  | 6.21 |
| A2AJ14 | Endoplasmic reticulum mannosyl-oligosaccharide 1,2-alpha-mannosidase (Fragment) OS=Mus musculus GN=Man1b1 PE=2 SV=1 - [A2AJ14_MOUSE] | 4.62  | 2 | 1  | 1  | 1   | 0.78 | 1.12 | 1.43 | 1.10 | 1.40 | 0.85 | 1.08 | 0.95 | 1.21 | 1.08 | 1.38 | 0.91 | 1.16 | 26.79  | 9.70 |
| G5E829 | MCG13663, isoform CRA_a OS=Mus musculus GN=Atp2b1 PE=3 SV=1 - [G5E829_MOUSE]                                                         | 38.69 | 1 | 23 | 42 | 254 | 0.93 | 1.15 | 1.16 | 1.14 | 1.16 | 0.90 | 0.98 | 0.95 | 1.00 | 0.97 | 1.04 | 0.90 | 0.99 | 134.66 | 5.91 |

|        |                                                                                                                                        |       |    |    |    |     |      |      |      |      |      |      |      |      |      |      |      |      |      |        |      |
|--------|----------------------------------------------------------------------------------------------------------------------------------------|-------|----|----|----|-----|------|------|------|------|------|------|------|------|------|------|------|------|------|--------|------|
| E9PX52 | Arf-GAP with SH3 domain, ANK repeat and PH domain-containing protein 2<br>OS=Mus musculus<br>GN=Asap2 PE=2<br>SV=1 -<br>[E9PX52_MOUSE] | 15.50 | 1  | 2  | 11 | 27  | 0.88 | 1.12 | 1.27 | 1.01 | 1.14 | 0.99 | 1.12 | 0.95 | 1.07 | 0.89 | 1.01 | 1.10 | 1.25 | 111.09 | 6.80 |
| Q91W86 | Vacuolar protein sorting-associated protein 11 homolog<br>OS=Mus musculus<br>GN=Vps11 PE=1<br>SV=3 -<br>[VPS11_MOUSE]                  | 6.27  | 1  | 5  | 5  | 8   | 1.03 | 0.92 | 0.95 | 1.10 | 1.00 | 0.88 | 0.91 | 0.95 | 0.92 | 0.90 | 0.93 | 0.95 | 0.96 | 107.65 | 7.01 |
| Q6PGC1 | ATP-dependent RNA helicase Dhx29<br>OS=Mus musculus<br>GN=Dhx29 PE=2<br>SV=1 -<br>[DHX29_MOUSE]                                        | 1.47  | 1  | 1  | 2  | 3   | 0.94 | 1.05 | 1.12 | 1.07 | 1.14 | 0.86 | 0.90 | 0.95 | 1.00 | 1.03 | 1.09 | 1.06 | 1.12 | 153.88 | 7.94 |
| Q9EPK2 | Isoform 3 of Protein XRP2<br>OS=Mus musculus<br>GN=Rp2 PE=2<br>[XRP2_MOUSE]                                                            | 7.45  | 4  | 2  | 2  | 2   | 0.85 | 0.64 | 0.75 | 0.86 | 1.01 | 0.95 | 1.11 | 0.95 | 1.12 | 0.75 | 0.88 | 0.82 | 0.97 | 36.54  | 5.48 |
| P52479 | Ubiquitin carboxyl-terminal hydrolase 10<br>OS=Mus musculus<br>GN=Usp10 PE=1<br>SV=3 -<br>[UBP10_MOUSE]                                | 7.07  | 3  | 4  | 4  | 8   | 1.13 | 1.14 | 1.17 | 1.10 | 1.00 | 1.00 | 1.00 | 0.95 | 0.88 | 1.04 | 0.99 | 1.23 | 1.05 | 86.97  | 5.17 |
| Q9CQY6 | Mitochondrial nucleoid factor 1<br>OS=Mus musculus<br>GN=Mnf1 PE=1<br>SV=1 -<br>[MNF1_MOUSE]                                           | 44.12 | 3  | 4  | 4  | 7   | 1.04 | 0.81 | 0.77 | 0.99 | 1.01 | 1.15 | 1.06 | 0.95 | 0.92 | 1.08 | 1.00 | 1.09 | 1.03 | 16.31  | 9.19 |
| Q8CCJ3 | Isoform 2 of E3 UFM1-protein ligase 1<br>OS=Mus musculus<br>GN=Ufl1 -<br>[UFL1_MOUSE]                                                  | 2.66  | 3  | 1  | 2  | 5   | 1.22 | 1.76 | 1.45 | 1.03 | 0.85 | 0.94 | 0.77 | 0.95 | 0.78 | 1.00 | 0.82 | 0.93 | 0.77 | 80.17  | 6.68 |
| Q9DB24 | Protein Tcea6<br>OS=Mus musculus<br>GN=Tcea6 PE=2<br>SV=1 -<br>[Q9DB24_MOUSE]                                                          | 54.50 | 1  | 2  | 12 | 205 | 1.27 | 0.41 | 0.30 | 0.92 | 0.74 | 1.18 | 0.90 | 0.95 | 0.76 | 0.86 | 0.63 | 0.85 | 0.67 | 22.56  | 5.55 |
| Q8BQP9 | Regulator of G-protein signaling 7-binding protein<br>OS=Mus musculus<br>GN=Rgs7bp PE=1<br>SV=1 -<br>[R7BP_MOUSE]                      | 20.62 | 1  | 3  | 3  | 6   | 0.93 | 1.22 | 1.24 | 1.14 | 1.22 | 0.86 | 0.90 | 0.95 | 1.01 | 1.13 | 1.09 | 0.97 | 1.04 | 29.00  | 8.46 |
| Q9D1Q6 | Endoplasmic reticulum resident protein 44<br>OS=Mus musculus<br>GN=Erp44 PE=1<br>SV=1 -<br>[ERP44_MOUSE]                               | 38.42 | 1  | 12 | 12 | 26  | 0.88 | 0.77 | 0.82 | 0.77 | 0.91 | 0.81 | 0.94 | 0.95 | 1.04 | 0.79 | 0.94 | 0.75 | 0.94 | 46.82  | 5.27 |
| A2A9S3 | ELAV-like protein 4<br>OS=Mus musculus<br>GN=Elav4 PE=2<br>SV=1 -<br>[A2A9S3_MOUSE]                                                    | 40.73 | 11 | 5  | 11 | 32  | 1.06 | 1.09 | 1.08 | 0.98 | 0.98 | 0.83 | 0.82 | 0.95 | 0.88 | 0.91 | 0.89 | 1.04 | 1.01 | 39.24  | 9.42 |
| G3UYF9 | Prefoldin subunit 6<br>OS=Mus musculus<br>GN=H2-Ke2 PE=2<br>SV=1 -<br>[G3UYF9_MOUSE]                                                   | 57.43 | 1  | 1  | 9  | 63  | 1.00 | 0.74 | 0.71 | 0.90 | 0.75 | 0.92 | 0.93 | 0.95 | 0.95 | 1.09 | 1.00 | 0.75 | 0.73 | 11.40  | 8.44 |

|          |                                                                                                                                   |       |    |    |    |    |      |      |      |      |      |      |      |      |      |      |      |      |      |        |       |
|----------|-----------------------------------------------------------------------------------------------------------------------------------|-------|----|----|----|----|------|------|------|------|------|------|------|------|------|------|------|------|------|--------|-------|
| Q3UID0   | SWI/SNF complex subunit SMARCC2<br>OS=Mus musculus<br>GN=Smrcc2 PE=2<br>SV=1 -<br>[Q3UID0_MOUSE]                                  | 18.32 | 8  | 17 | 17 | 44 | 0.90 | 0.92 | 0.95 | 0.88 | 0.98 | 1.00 | 1.01 | 0.95 | 1.02 | 0.89 | 0.97 | 0.99 | 0.98 | 124.60 | 5.47  |
| B2KF50   | Protein Uhrf1bp1<br>OS=Mus musculus<br>GN=Uhrf1bp1 PE=2<br>SV=1 -<br>[B2KF50_MOUSE]                                               | 1.89  | 1  | 1  | 2  | 3  | 0.99 | 0.91 | 0.91 | 1.10 | 1.11 | 1.05 | 1.05 | 0.95 | 0.95 | 1.06 | 1.07 | 1.22 | 1.23 | 156.91 | 6.21  |
| B8JK33   | Heterogeneous nuclear ribonucleoprotein M<br>OS=Mus musculus<br>GN=Hnrpnm PE=2<br>SV=1 -<br>[B8JK33_MOUSE]                        | 28.28 | 6  | 13 | 13 | 36 | 0.90 | 1.00 | 1.11 | 0.96 | 1.08 | 0.96 | 1.05 | 0.95 | 1.05 | 1.01 | 1.09 | 1.01 | 1.11 | 68.12  | 8.32  |
| Q9Z1L5   | Voltage-dependent calcium channel subunit alpha-2/delta-3<br>OS=Mus musculus<br>GN=Cacna2d3 PE=1<br>SV=1 -<br>[CA2D3_MOUSE]       | 19.62 | 1  | 16 | 16 | 33 | 0.99 | 1.03 | 0.99 | 1.12 | 1.08 | 0.92 | 0.94 | 0.95 | 0.91 | 0.96 | 0.95 | 1.01 | 1.02 | 122.70 | 5.73  |
| Q8CH18-5 | Isoform 3 of Cell division cycle and apoptosis regulator protein 1<br>OS=Mus musculus<br>GN=Ccar1 PE=1<br>SV=1 -<br>[CCAR1_MOUSE] | 2.95  | 3  | 3  | 3  | 7  | 1.08 | 0.84 | 0.84 | 1.03 | 0.95 | 1.01 | 1.00 | 0.95 | 0.87 | 1.01 | 0.89 | 0.90 | 0.93 | 124.67 | 6.02  |
| Q8R191   | Synaptogyrin-3<br>OS=Mus musculus<br>GN=Syng3 PE=1<br>SV=1 -<br>[SNG3_MOUSE]                                                      | 45.41 | 1  | 6  | 6  | 19 | 1.13 | 1.38 | 1.05 | 1.18 | 0.99 | 0.88 | 0.82 | 0.95 | 0.87 | 0.98 | 0.90 | 1.14 | 1.01 | 24.55  | 8.18  |
| Q8K4R4   | Cytoplasmic phosphatidylinositol transfer protein 1<br>OS=Mus musculus<br>GN=Pitpn1 PE=1<br>SV=1 -<br>[PITC1_MOUSE]               | 35.24 | 4  | 9  | 9  | 34 | 0.89 | 0.88 | 0.91 | 0.93 | 1.08 | 0.92 | 1.06 | 0.95 | 1.13 | 0.88 | 1.02 | 0.93 | 1.06 | 38.36  | 6.32  |
| Q04735-2 | Isoform Short of Cyclin-dependent kinase 16<br>OS=Mus musculus<br>GN=Cdk16 PE=1<br>SV=1 -<br>[CDK16_MOUSE]                        | 10.85 | 50 | 1  | 5  | 9  | 0.90 | 0.85 | 0.95 | 1.11 | 1.24 | 0.96 | 1.07 | 0.95 | 1.06 | 0.97 | 1.08 | 0.91 | 1.02 | 52.69  | 7.17  |
| Q62186   | Translocon-associated protein subunit delta<br>OS=Mus musculus<br>GN=Ssr4 PE=2 SV=1 -<br>[SSRD_MOUSE]                             | 25.58 | 2  | 3  | 3  | 5  | 1.10 | 1.00 | 0.90 | 0.99 | 0.90 | 0.77 | 0.69 | 0.95 | 0.86 | 0.87 | 0.79 | 0.95 | 0.86 | 18.92  | 5.78  |
| F8WJ13   | Coiled-coil domain-containing protein 58<br>OS=Mus musculus<br>GN=Ccdc58 PE=2<br>SV=1 -<br>[F8WJ13_MOUSE]                         | 54.48 | 3  | 6  | 6  | 19 | 1.03 | 0.88 | 0.81 | 1.01 | 0.90 | 0.99 | 0.90 | 0.95 | 0.93 | 0.86 | 0.83 | 0.91 | 0.81 | 15.59  | 8.60  |
| B1ARA3   | 60S ribosomal protein L26 (Fragment)<br>OS=Mus musculus<br>GN=Rpl26 PE=2<br>SV=1 -<br>[B1ARA3_MOUSE]                              | 24.27 | 4  | 3  | 3  | 5  | 0.93 | 1.19 | 1.30 | 1.05 | 1.13 | 0.96 | 1.10 | 0.95 | 1.09 | 0.96 | 1.13 | 0.99 | 0.99 | 12.21  | 10.92 |

|          |                                                                                                                                        |       |    |    |    |      |      |      |      |      |      |      |      |      |      |      |      |      |      |        |       |
|----------|----------------------------------------------------------------------------------------------------------------------------------------|-------|----|----|----|------|------|------|------|------|------|------|------|------|------|------|------|------|------|--------|-------|
| Q9QZQ8   | Core histone macro-H2A.1 OS=Mus musculus GN=H2afy PE=1 SV=3 - [H2AY_MOUSE]                                                             | 27.96 | 2  | 6  | 8  | 30   | 1.11 | 1.00 | 0.94 | 1.03 | 0.94 | 1.06 | 0.92 | 0.95 | 0.88 | 1.00 | 0.91 | 1.13 | 0.97 | 39.71  | 9.80  |
| Q60996-3 | Isoform 3 of Serine/threonine-protein phosphatase 2A 56 kDa regulatory subunit gamma isoform OS=Mus musculus GN=Ppp2r5c - [2A5G_MOUSE] | 10.72 | 4  | 2  | 4  | 7    | 1.10 | 1.44 | 1.31 | 1.22 | 1.11 | 0.86 | 0.78 | 0.95 | 0.86 | 1.01 | 0.92 | 0.84 | 0.77 | 56.52  | 6.96  |
| E9PYR7   | Protein Mctp1 OS=Mus musculus GN=Mctp1 PE=2 SV=1 - [E9PYR7_MOUSE]                                                                      | 2.82  | 1  | 1  | 1  | 2    | 1.06 | 1.33 | 1.26 | 1.07 | 1.01 | 1.00 | 0.94 | 0.95 | 0.90 | 1.02 | 0.97 | 1.02 | 0.97 | 36.37  | 7.91  |
| Q9WTU6   | Isoform Alpha-1 of Mitogen-activated protein kinase 9 OS=Mus musculus GN=Mapk9 - [MK09_MOUSE]                                          | 29.92 | 15 | 5  | 10 | 20   | 0.98 | 1.05 | 1.12 | 0.97 | 1.01 | 0.89 | 0.90 | 0.95 | 0.98 | 0.90 | 0.96 | 0.90 | 1.05 | 44.05  | 6.54  |
| D3Z5F9   | Protein YIF1B (Fragment) OS=Mus musculus GN=Yif1b PE=2 SV=1 - [D3Z5F9_MOUSE]                                                           | 13.89 | 4  | 1  | 1  | 3    | 0.76 | 1.03 | 1.34 | 1.08 | 1.41 | 1.07 | 1.39 | 0.95 | 1.24 | 0.92 | 1.20 | 0.77 | 1.02 | 19.26  | 10.35 |
| Q91XU0-  | Isoform 2 of ATPase WRNIP1 OS=Mus musculus GN=Wrip1 - [WRIP1_MOUSE]                                                                    | 8.10  | 2  | 4  | 4  | 5    | 0.96 | 1.08 | 1.11 | 0.92 | 0.92 | 0.93 | 0.95 | 0.95 | 0.98 | 0.92 | 0.95 | 0.81 | 0.83 | 61.37  | 5.96  |
| A2APX7   | Protein Scn1a OS=Mus musculus GN=Scn1a PE=2 SV=1 - [A2APX7_MOUSE]                                                                      | 6.81  | 8  | 8  | 14 | 42   | 0.93 | 0.90 | 0.93 | 1.08 | 1.11 | 0.83 | 0.87 | 0.95 | 0.98 | 0.79 | 0.88 | 0.78 | 0.87 | 225.85 | 5.99  |
| P68369   | Tubulin alpha-1A chain OS=Mus musculus GN=Tuba1a PE=1 SV=1 - [TBA1A_MOUSE]                                                             | 77.83 | 3  | 15 | 39 | 2828 | 0.98 | 1.02 | 1.02 | 1.03 | 1.05 | 0.99 | 0.99 | 0.95 | 0.94 | 0.99 | 0.98 | 1.00 | 1.04 | 50.10  | 5.06  |
| Q6P5U7   | Leucine-rich repeat and WD repeat-containing protein KIAA1239 OS=Mus musculus GN=Kiaa1239 PE=2 SV=2 - [K1239_MOUSE]                    | 5.97  | 2  | 7  | 8  | 15   | 1.06 | 1.21 | 1.22 | 1.11 | 1.09 | 0.95 | 0.93 | 0.95 | 0.95 | 0.97 | 0.99 | 1.09 | 1.08 | 197.29 | 6.15  |
| Q810U4-5 | Isoform 5 of Neuronal cell adhesion molecule OS=Mus musculus GN=Nrcam - [NRCAM_MOUSE]                                                  | 49.62 | 2  | 1  | 8  | 112  | 1.02 | 0.82 | 0.77 | 0.96 | 0.94 | 0.99 | 0.95 | 0.95 | 1.00 | 0.94 | 0.90 | 0.83 | 0.81 | 28.95  | 8.43  |
| A2AJA9   | Uncharacterized protein C9orf172 homolog OS=Mus musculus GN=Gm996 PE=1 SV=1 - [CI172_MOUSE]                                            | 20.64 | 2  | 15 | 15 | 29   | 1.01 | 1.09 | 1.03 | 1.08 | 1.12 | 0.96 | 1.00 | 0.95 | 0.92 | 0.96 | 0.94 | 0.96 | 0.93 | 107.12 | 9.11  |
| Q8CGF6   | WD repeat-containing protein 47 OS=Mus musculus GN=Wdr47 PE=1 SV=2 - [WDR47_MOUSE]                                                     | 18.91 | 1  | 11 | 11 | 19   | 1.02 | 1.09 | 1.02 | 1.00 | 1.00 | 0.94 | 0.90 | 0.95 | 0.87 | 0.99 | 0.93 | 1.00 | 0.99 | 102.25 | 5.97  |

|          |                                                                                                                       |       |    |    |    |     |      |      |      |      |      |      |      |      |      |      |      |      |      |        |      |
|----------|-----------------------------------------------------------------------------------------------------------------------|-------|----|----|----|-----|------|------|------|------|------|------|------|------|------|------|------|------|------|--------|------|
| Q64737   | Trifunctional purine biosynthetic protein adenosine-3 OS=Mus musculus GN=Gart PE=2 SV=3 - [PUR2_MOUSE]                | 13.07 | 3  | 9  | 9  | 19  | 0.97 | 0.94 | 0.95 | 1.09 | 1.12 | 0.96 | 1.05 | 0.95 | 0.96 | 1.08 | 1.08 | 1.08 | 1.12 | 107.44 | 6.68 |
| P49615   | Cyclin-dependent kinase 5 OS=Mus musculus GN=Cdk5 PE=1 SV=1 - [CDK5_MOUSE]                                            | 41.78 | 49 | 8  | 10 | 24  | 1.08 | 1.01 | 0.90 | 1.11 | 1.00 | 1.02 | 0.96 | 0.95 | 0.92 | 0.95 | 0.90 | 1.11 | 0.99 | 33.27  | 7.66 |
| Q6P4T2   | U5 small nuclear ribonucleoprotein 200 kDa helicase OS=Mus musculus GN=Snrp200 PE=2 SV=1 - [U520_MOUSE]               | 13.39 | 1  | 21 | 21 | 36  | 1.00 | 1.09 | 1.07 | 0.99 | 1.02 | 1.00 | 0.99 | 0.95 | 0.94 | 0.93 | 0.97 | 1.01 | 1.00 | 244.39 | 6.06 |
| E9Q1T1   | Calcium/calmodulin-dependent protein kinase type II subunit beta OS=Mus musculus GN=Camk2d PE=2 SV=1 - [E9Q1T1_MOUSE] | 41.09 | 15 | 10 | 17 | 101 | 1.25 | 1.07 | 0.91 | 1.12 | 0.97 | 1.01 | 0.84 | 0.95 | 0.78 | 1.12 | 0.89 | 1.12 | 0.96 | 59.97  | 7.27 |
| D3Z0B8   | DCN1-like protein 1 (Fragment) OS=Mus musculus GN=Dcn1d1 PE=2 SV=1 - [D3Z0B8_MOUSE]                                   | 29.91 | 5  | 3  | 5  | 12  | 0.95 | 1.00 | 0.99 | 0.94 | 1.04 | 0.92 | 0.91 | 0.95 | 1.00 | 0.95 | 1.00 | 1.04 | 0.91 | 24.92  | 5.25 |
| F8WGN6   | Kinesin-like protein KIF21A OS=Mus musculus GN=Kif21a PE=2 SV=1 - [F8WGN6_MOUSE]                                      | 31.14 | 14 | 33 | 34 | 96  | 1.02 | 1.01 | 1.05 | 1.04 | 1.08 | 0.97 | 0.97 | 0.95 | 0.95 | 0.95 | 0.98 | 0.98 | 0.96 | 181.26 | 6.06 |
| P39061-2 | Isoform 3 of Collagen alpha-1(XVIII) chain OS=Mus musculus GN=Col18a1 - [CO1A1_MOUSE]                                 | 1.29  | 4  | 1  | 1  | 2   | 1.08 | 1.29 | 1.19 | 1.02 | 0.95 | 0.89 | 0.82 | 0.95 | 0.88 | 1.17 | 1.08 | 1.13 | 1.05 | 134.12 | 6.00 |
| O55192   | Sodium-dependent noradrenaline transporter OS=Mus musculus GN=Slc6a2 PE=2 SV=2 - [SC6A2_MOUSE]                        | 11.02 | 1  | 4  | 4  | 8   | 1.03 | 1.25 | 1.12 | 1.09 | 1.00 | 0.89 | 0.85 | 0.95 | 0.90 | 0.98 | 0.92 | 0.96 | 0.86 | 69.21  | 7.44 |
| Q08274   | Dystrophia myotonica WD repeat-containing protein OS=Mus musculus GN=Dmwd PE=2 SV=3 - [DMWD_MOUSE]                    | 12.93 | 2  | 6  | 6  | 10  | 1.04 | 1.02 | 1.02 | 1.02 | 0.98 | 0.95 | 0.94 | 0.95 | 0.91 | 0.88 | 0.85 | 0.97 | 1.00 | 69.77  | 7.24 |
| Q8CBE3   | WD repeat-containing protein 37 OS=Mus musculus GN=Wdr37 PE=2 SV=1 - [WDR37_MOUSE]                                    | 18.35 | 7  | 8  | 8  | 33  | 0.97 | 0.98 | 0.99 | 0.99 | 1.03 | 0.95 | 0.98 | 0.95 | 0.97 | 0.97 | 1.00 | 1.03 | 1.08 | 55.01  | 7.23 |

|         |                                                                                                                    |       |   |    |    |     |      |      |      |      |      |      |      |      |      |      |      |      |      |        |      |
|---------|--------------------------------------------------------------------------------------------------------------------|-------|---|----|----|-----|------|------|------|------|------|------|------|------|------|------|------|------|------|--------|------|
| E9Q5E0  | Myocyte-specific enhancer factor 2D<br>OS=Mus musculus<br>GN=Mef2d PE=2<br>SV=1 -<br>[E9Q5E0_MOUSE]                | 24.31 | 5 | 7  | 7  | 11  | 0.85 | 0.96 | 1.19 | 0.90 | 1.13 | 0.91 | 1.14 | 0.95 | 1.23 | 0.92 | 1.10 | 0.88 | 1.01 | 54.08  | 8.38 |
| Q3U2V3- | Isoform 2 of 8-oxo-dGDP phosphatase<br>NUDT18 OS=Mus musculus GN=Nudt18 -<br>[NUDT18_MOUSE]                        | 14.23 | 3 | 3  | 3  | 6   | 1.08 | 1.37 | 1.02 | 0.92 | 0.87 | 0.99 | 0.92 | 0.95 | 0.95 | 0.91 | 0.88 | 0.93 | 0.93 | 27.34  | 6.42 |
| P68510  | 14-3-3 protein eta<br>OS=Mus musculus<br>GN=Ywhah PE=1<br>SV=2 -<br>[1433F_MOUSE]                                  | 72.36 | 3 | 14 | 21 | 417 | 0.97 | 0.88 | 0.92 | 0.98 | 1.02 | 0.95 | 0.97 | 0.95 | 0.97 | 0.92 | 0.93 | 0.89 | 0.93 | 28.19  | 4.89 |
| Q8K1M6- | Isoform 3 of Dynamin-1-like protein OS=Mus musculus GN=Dnm11 -<br>[DNM11_MOUSE]                                    | 55.36 | 2 | 2  | 33 | 92  | 0.96 | 1.31 | 1.37 | 1.24 | 1.30 | 1.04 | 1.08 | 0.95 | 0.99 | 1.00 | 1.05 | 1.00 | 1.05 | 77.96  | 6.81 |
| Q6NVF9  | Cleavage and polyadenylation specificity factor subunit 6 OS=Mus musculus GN=Cpsf6<br>PE=1 SV=1 -<br>[CPSF6_MOUSE] | 20.87 | 5 | 9  | 9  | 17  | 0.96 | 0.85 | 0.86 | 0.95 | 0.99 | 0.95 | 0.97 | 0.95 | 0.98 | 0.90 | 0.91 | 0.96 | 1.02 | 59.12  | 7.15 |
| Q921J2  | GTP-binding protein Rheb OS=Mus musculus GN=Rheb<br>PE=1 SV=1 -<br>[RHEB_MOUSE]                                    | 17.93 | 1 | 3  | 3  | 14  | 0.96 | 0.80 | 0.87 | 0.99 | 1.01 | 0.94 | 0.89 | 0.95 | 0.91 | 0.91 | 0.91 | 0.97 | 1.00 | 20.44  | 5.92 |
| D3Z4N2  | Sphingosine-1-phosphate phosphatase 1 (Fragment) OS=Mus musculus GN=Spp1<br>PE=2 SV=1 -<br>[D3Z4N2_MOUSE]          | 5.49  | 3 | 1  | 1  | 2   | 1.19 | 1.06 | 0.89 | 0.78 | 0.66 | 2.45 | 2.05 | 0.95 | 0.80 | 0.95 | 0.80 | 1.08 | 0.91 | 17.89  | 4.30 |
| Q9QZ18  | Serine incorporator 1 OS=Mus musculus GN=Serinc1 PE=1<br>SV=1 -<br>[SERC1_MOUSE]                                   | 6.62  | 1 | 2  | 2  | 9   | 1.18 | 1.37 | 1.26 | 1.24 | 1.14 | 0.92 | 0.79 | 0.95 | 0.85 | 0.96 | 1.06 | 1.00 | 0.99 | 50.48  | 6.28 |
| Q80YA9  | Connector enhancer of ras 2 OS=Mus musculus GN=Cnksr2<br>PE=1 SV=1 -<br>[CNKR2_MOUSE]                              | 17.83 | 3 | 15 | 15 | 38  | 1.00 | 1.19 | 1.23 | 1.07 | 1.12 | 0.96 | 0.96 | 0.95 | 1.06 | 0.90 | 0.94 | 1.01 | 1.02 | 117.32 | 6.79 |
| E9Q4D4  | Polycystic kidney disease protein 1-like 2 OS=Mus musculus GN=Pkd112 PE=4<br>SV=2 -<br>[E9Q4D4_MOUSE]              | 0.33  | 3 | 1  | 1  | 1   | 1.04 | 0.74 | 0.70 | 1.03 | 0.99 | 1.01 | 0.96 | 0.95 | 0.91 | 0.93 | 0.89 | 0.95 | 0.91 | 271.89 | 5.63 |
| Q1RLL3  | Copine-9 OS=Mus musculus GN=Cpne9<br>PE=2 SV=1 -<br>[CPNE9_MOUSE]                                                  | 16.09 | 1 | 2  | 7  | 14  | 0.97 | 1.31 | 1.34 | 1.15 | 1.17 | 1.02 | 1.07 | 0.95 | 1.01 | 0.85 | 0.90 | 0.88 | 0.89 | 61.81  | 5.40 |
| A2ALS7  | Protein Rap1gap (Fragment) OS=Mus musculus GN=Rap1gap PE=2<br>SV=1 -<br>[A2ALS7_MOUSE]                             | 29.63 | 1 | 1  | 8  | 22  | 1.11 | 0.83 | 0.75 | 1.04 | 0.94 | 0.99 | 0.89 | 0.95 | 0.86 | 1.08 | 0.98 | 1.14 | 1.04 | 43.37  | 6.01 |

|          |                                                                                                                  |       |    |     |     |      |      |      |      |      |      |      |      |      |      |      |      |      |      |        |      |
|----------|------------------------------------------------------------------------------------------------------------------|-------|----|-----|-----|------|------|------|------|------|------|------|------|------|------|------|------|------|------|--------|------|
| Q6P3Y5-2 | Isoform 2 of Zinc finger protein 280C<br>OS=Mus musculus<br>GN=Zn280c -<br>[Z280C_MOUSE]                         | 3.90  | 3  | 1   | 1   | 2    | 0.97 | 0.45 | 0.47 | 1.17 | 1.21 | 0.87 | 0.89 | 0.95 | 0.98 | 1.07 | 1.11 | 0.74 | 0.77 | 77.85  | 9.20 |
| D3Z634   | Latrophilin-3 OS=Mus musculus<br>GN=Lphn3<br>PE=2 SV=1 -<br>[D3Z634_MOUSE]                                       | 18.29 | 23 | 22  | 22  | 41   | 1.07 | 1.10 | 1.01 | 1.09 | 1.02 | 1.07 | 0.95 | 0.95 | 0.91 | 1.06 | 0.97 | 1.07 | 0.96 | 162.92 | 6.42 |
| Q61249   | Immunoglobulin-binding protein 1<br>OS=Mus musculus<br>GN=Igbp1 PE=1 SV=1<br>-[IGBP1_MOUSE]                      | 27.94 | 1  | 8   | 8   | 21   | 0.89 | 0.81 | 0.93 | 0.84 | 0.96 | 0.86 | 1.01 | 0.95 | 1.08 | 0.84 | 0.90 | 0.87 | 0.99 | 38.95  | 6.18 |
| Q64324   | Syntaxin-binding protein 2 OS=Mus musculus<br>GN=Stxbp2<br>PE=2 SV=1 -<br>[STXB2_MOUSE]                          | 1.69  | 2  | 1   | 1   | 2    | 1.03 | 1.29 | 1.25 | 1.23 | 1.20 | 0.99 | 0.96 | 0.95 | 0.92 | 1.14 | 1.11 | 1.16 | 1.12 | 66.32  | 6.74 |
| Q0VE29   | Sterile alpha motif domain-containing protein 12 OS=Mus musculus<br>GN=Samd12<br>PE=2 SV=1 -<br>[SAM12_MOUSE]    | 26.71 | 2  | 3   | 3   | 5    | 1.08 | 0.78 | 0.72 | 0.96 | 0.93 | 0.92 | 0.90 | 0.95 | 0.87 | 0.99 | 0.92 | 0.94 | 0.87 | 18.23  | 9.10 |
| Q8R1T1   | Charged multivesicular body protein 7<br>OS=Mus musculus<br>GN=Chmp7 PE=1 SV=1 -<br>[CHMP7_MOUSE]                | 11.75 | 2  | 4   | 4   | 10   | 0.96 | 0.78 | 0.93 | 0.99 | 1.03 | 0.96 | 1.00 | 0.95 | 0.98 | 0.98 | 1.08 | 0.95 | 1.02 | 50.60  | 5.22 |
| Q5DTN8   | Janus kinase and microtubule-interacting protein 3 OS=Mus musculus<br>GN=Jakmip3<br>PE=2 SV=2 -<br>[JKIP3_MOUSE] | 8.65  | 5  | 4   | 7   | 13   | 0.93 | 1.05 | 1.13 | 0.84 | 0.96 | 0.84 | 0.88 | 0.95 | 1.05 | 0.96 | 1.03 | 0.95 | 1.02 | 98.65  | 5.74 |
| Q62261   | Spectrin beta chain, non-erythrocytic 1<br>OS=Mus musculus<br>GN=Sptbn1 PE=1 SV=2 -<br>[SPTB2_MOUSE]             | 72.75 | 3  | 141 | 153 | 1268 | 0.96 | 0.97 | 1.02 | 1.02 | 1.05 | 0.97 | 1.00 | 0.95 | 0.99 | 0.96 | 1.00 | 0.99 | 1.03 | 274.05 | 5.58 |
| Q9CQA1   | Trafficking protein particle complex subunit 5 OS=Mus musculus<br>GN=Trappc5<br>PE=1 SV=1 -<br>[TPPC5_MOUSE]     | 11.17 | 1  | 2   | 2   | 4    | 1.05 | 0.82 | 0.78 | 1.02 | 0.96 | 0.88 | 0.83 | 0.95 | 0.90 | 0.95 | 0.90 | 1.40 | 1.33 | 20.78  | 9.66 |
| P68368   | Tubulin alpha-4A chain OS=Mus musculus<br>GN=Tuba4a<br>PE=1 SV=1 -<br>[TBA4A_MOUSE]                              | 80.58 | 2  | 13  | 36  | 2632 | 0.91 | 0.93 | 1.06 | 1.02 | 1.12 | 0.92 | 1.04 | 0.95 | 1.02 | 0.95 | 1.01 | 0.92 | 1.01 | 49.89  | 5.06 |
| Q9D4J7-2 | Isoform 2 of PHD finger protein 6<br>OS=Mus musculus<br>GN=Phf6 -<br>[PHF6_MOUSE]                                | 10.56 | 3  | 3   | 3   | 4    | 1.18 | 1.03 | 1.02 | 0.93 | 0.83 | 0.79 | 0.71 | 0.95 | 0.92 | 0.88 | 0.84 | 1.04 | 0.85 | 32.26  | 8.59 |
| G3UWJ4   | 28S ribosomal protein S29, mitochondrial (Fragment) OS=Mus musculus<br>GN=Dap3<br>PE=2 SV=1 -<br>[G3UWJ4_MOUSE]  | 6.00  | 7  | 1   | 1   | 2    | 1.08 | 0.97 | 0.90 | 1.17 | 1.09 | 0.96 | 0.88 | 0.95 | 0.88 | 1.10 | 1.02 | 1.14 | 1.06 | 23.11  | 9.48 |



|        |                                                                                                                                                    |       |   |    |    |    |      |      |      |      |      |      |      |      |      |      |      |      |      |        |       |
|--------|----------------------------------------------------------------------------------------------------------------------------------------------------|-------|---|----|----|----|------|------|------|------|------|------|------|------|------|------|------|------|------|--------|-------|
| Q8R0J7 | Vacuolar protein sorting-associated protein 37B OS=Mus musculus GN=Vps37b PE=2 SV=1 - [VP37B_MOUSE]                                                | 39.30 | 1 | 6  | 6  | 20 | 0.90 | 0.76 | 0.90 | 0.85 | 0.94 | 1.09 | 0.98 | 0.95 | 1.04 | 0.93 | 0.96 | 0.84 | 0.94 | 31.04  | 7.05  |
| O54941 | SWI/SNF-related matrix-associated actin-dependent regulator of chromatin subfamily E member 1 OS=Mus musculus GN=Smarca1 PE=1 SV=1 - [SMCE1_MOUSE] | 25.30 | 1 | 10 | 11 | 30 | 0.96 | 0.78 | 0.82 | 0.80 | 0.84 | 0.98 | 0.94 | 0.95 | 1.04 | 0.81 | 0.81 | 0.85 | 0.91 | 46.61  | 4.88  |
| Q8K448 | ATP-binding cassette sub-family A member 5 OS=Mus musculus GN=Abca5 PE=1 SV=2 - [ABCA5_MOUSE]                                                      | 0.73  | 1 | 1  | 1  | 2  | 1.06 | 0.98 | 0.93 | 1.18 | 1.12 | 1.03 | 0.97 | 0.95 | 0.90 | 1.12 | 1.06 | 0.90 | 0.85 | 185.77 | 7.20  |
| Q9JKB3 | Y-box-binding protein 3 OS=Mus musculus GN=Ybx3 PE=1 SV=2 - [YBOX3_MOUSE]                                                                          | 25.48 | 5 | 3  | 5  | 12 | 1.04 | 1.04 | 1.00 | 1.05 | 1.01 | 1.00 | 0.96 | 0.95 | 0.92 | 0.92 | 0.88 | 0.99 | 0.96 | 38.79  | 9.69  |
| F6YBB8 | RNA-binding protein NOB1 (Fragment) OS=Mus musculus GN=Nob1 PE=4 SV=1 - [F6YBB8_MOUSE]                                                             | 14.52 | 3 | 1  | 1  | 1  | 0.88 | 0.89 | 1.00 | 0.99 | 1.12 | 0.98 | 1.10 | 0.95 | 1.08 | 0.98 | 1.11 | 0.99 | 1.12 | 7.12   | 9.41  |
| Q8BGS2 | Bola-like protein 2 OS=Mus musculus GN=Bola2 PE=1 SV=1 - [BOLA2_MOUSE]                                                                             | 62.79 | 2 | 5  | 5  | 34 | 1.03 | 0.86 | 0.91 | 0.89 | 0.89 | 0.94 | 0.90 | 0.95 | 0.93 | 0.91 | 0.83 | 0.92 | 0.87 | 10.21  | 6.16  |
| Q5SWU9 | Acetyl-CoA carboxylase 1 OS=Mus musculus GN=Acaca PE=1 SV=1 - [ACACA_MOUSE]                                                                        | 3.88  | 4 | 9  | 9  | 13 | 1.00 | 1.06 | 1.12 | 1.07 | 0.98 | 0.91 | 0.91 | 0.95 | 1.00 | 0.94 | 1.03 | 1.04 | 1.02 | 265.09 | 6.39  |
| Q9CQ60 | 6-phosphogluconolactonase OS=Mus musculus GN=Pgl3 PE=2 SV=1 - [6PGL_MOUSE]                                                                         | 43.19 | 4 | 8  | 8  | 21 | 1.00 | 1.22 | 1.14 | 1.08 | 1.06 | 0.94 | 0.91 | 0.95 | 0.94 | 1.01 | 0.93 | 0.91 | 0.98 | 27.24  | 5.85  |
| Q8BJI1 | Sodium-dependent neutral amino acid transporter SLC6A17 OS=Mus musculus GN=Slc6a17 PE=1 SV=1 - [S6A17_MOUSE]                                       | 16.64 | 2 | 9  | 9  | 48 | 1.01 | 1.13 | 1.06 | 1.11 | 1.09 | 0.93 | 0.87 | 0.95 | 0.94 | 0.95 | 0.97 | 0.95 | 0.96 | 81.02  | 6.23  |
| Q0VBL3 | Protein Rbm15 OS=Mus musculus GN=Rbm15 PE=2 SV=1 - [Q0VBL3_MOUSE]                                                                                  | 6.44  | 1 | 5  | 5  | 7  | 0.96 | 1.19 | 1.25 | 0.96 | 1.00 | 0.89 | 1.05 | 0.95 | 0.99 | 0.98 | 1.05 | 1.07 | 1.21 | 105.66 | 10.08 |

|        |                                                                                                                                       |       |    |    |    |     |      |      |      |      |      |      |      |      |      |      |      |      |      |        |      |
|--------|---------------------------------------------------------------------------------------------------------------------------------------|-------|----|----|----|-----|------|------|------|------|------|------|------|------|------|------|------|------|------|--------|------|
| P62715 | Serine/threonine-protein phosphatase 2A catalytic subunit beta isoform OS=Mus musculus GN=Ppp2cb PE=1 SV=1 - [PP2AB_MOUSE]            | 63.75 | 1  | 2  | 15 | 168 | 0.95 | 1.02 | 1.04 | 0.98 | 1.07 | 0.87 | 0.91 | 0.95 | 1.01 | 0.94 | 1.03 | 0.88 | 0.92 | 35.55  | 5.43 |
| Q9CZU3 | Superkiller viralicidic activity 2-like 2 OS=Mus musculus GN=Skiv2l2 PE=2 SV=1 - [SK2L2_MOUSE]                                        | 3.46  | 1  | 2  | 2  | 3   | 1.07 | 1.21 | 1.13 | 0.97 | 0.90 | 0.84 | 0.78 | 0.95 | 0.89 | 0.96 | 0.90 | 1.00 | 0.94 | 117.56 | 6.40 |
| Q76MZ3 | Serine/threonine-protein phosphatase 2A 65 kDa regulatory subunit A alpha isoform OS=Mus musculus GN=Ppp2r1a PE=1 SV=3 - [2AAA_MOUSE] | 46.18 | 12 | 24 | 24 | 93  | 0.99 | 1.14 | 1.17 | 1.12 | 1.13 | 0.96 | 0.95 | 0.95 | 0.98 | 1.03 | 1.03 | 1.15 | 1.12 | 65.28  | 5.11 |
| O54781 | SRSF protein kinase 2 OS=Mus musculus GN=SrpK2 PE=1 SV=2 - [SRPK2_MOUSE]                                                              | 21.29 | 2  | 10 | 12 | 26  | 0.92 | 0.90 | 0.99 | 1.06 | 1.15 | 0.92 | 1.00 | 0.95 | 1.10 | 0.94 | 1.02 | 0.93 | 1.06 | 76.71  | 4.91 |
| Q9D708 | Protein S100a16 OS=Mus musculus GN=S100a16 PE=2 SV=1 - [Q9D708_MOUSE]                                                                 | 42.74 | 2  | 3  | 3  | 16  | 1.09 | 1.14 | 1.04 | 0.92 | 0.84 | 0.98 | 0.93 | 0.95 | 0.98 | 0.96 | 0.88 | 1.00 | 0.97 | 14.31  | 5.86 |
| Q8BJW6 | Isoform 2 of Eukaryotic translation initiation factor 2A OS=Mus musculus GN=EIF2a - [EIF2A_MOUSE]                                     | 11.09 | 3  | 4  | 4  | 8   | 0.98 | 1.04 | 1.16 | 1.06 | 1.04 | 1.00 | 0.99 | 0.95 | 1.06 | 0.91 | 0.95 | 0.97 | 1.11 | 54.10  | 8.98 |
| Q91WL8 | Isoform 2 of WW domain-containing oxidoreductase OS=Mus musculus GN=Wwox - [WWOX_MOUSE]                                               | 18.35 | 4  | 2  | 2  | 4   | 0.99 | 1.13 | 1.14 | 1.05 | 1.06 | 0.93 | 0.94 | 0.95 | 0.97 | 0.97 | 0.99 | 1.07 | 1.09 | 17.96  | 5.64 |
| Q07813 | Apoptosis regulator BAX OS=Mus musculus GN=Bax PE=1 SV=1 - [BAX_MOUSE]                                                                | 17.71 | 1  | 2  | 2  | 3   | 0.92 | 0.83 | 0.90 | 0.84 | 0.91 | 1.01 | 1.09 | 0.95 | 1.03 | 0.80 | 0.87 | 0.86 | 0.93 | 21.38  | 4.98 |
| Q3TLZ6 | Glutamyl-tRNA(Gln) amidotransferase subunit B, mitochondrial OS=Mus musculus GN=Pet112 PE=2 SV=1 - [Q3TLZ6_MOUSE]                     | 7.20  | 3  | 2  | 2  | 5   | 0.91 | 0.92 | 1.01 | 1.03 | 1.13 | 0.96 | 1.05 | 0.95 | 1.04 | 0.98 | 1.10 | 0.92 | 1.04 | 52.51  | 8.27 |
| Q61282 | Aggrecan core protein OS=Mus musculus GN=Acan PE=1 SV=2 - [PGCA_MOUSE]                                                                | 17.82 | 1  | 27 | 28 | 97  | 0.94 | 0.89 | 0.94 | 0.86 | 0.90 | 0.92 | 0.96 | 0.95 | 0.96 | 0.88 | 0.91 | 0.83 | 0.89 | 221.81 | 4.30 |

|        |                                                                                                                          |       |   |    |    |     |      |      |      |       |       |      |      |      |      |      |      |      |      |        |       |
|--------|--------------------------------------------------------------------------------------------------------------------------|-------|---|----|----|-----|------|------|------|-------|-------|------|------|------|------|------|------|------|------|--------|-------|
| G3X997 | Metallo-beta-lactamase domain-containing protein 2 OS=Mus musculus GN=Mblac2 PE=4 SV=1 - [G3X997_MOUSE]                  | 35.13 | 2 | 7  | 7  | 14  | 1.22 | 1.18 | 0.98 | 1.10  | 0.96  | 1.03 | 0.84 | 0.96 | 0.84 | 1.06 | 0.91 | 1.15 | 0.96 | 31.19  | 6.86  |
| I7HLV2 | 60S ribosomal protein L10 (Fragment) OS=Mus musculus GN=Rpl10 PE=4 SV=1 - [I7HLV2_MOUSE]                                 | 33.33 | 4 | 5  | 5  | 23  | 1.02 | 0.98 | 1.07 | 0.99  | 1.01  | 0.92 | 0.91 | 0.96 | 0.92 | 0.98 | 0.97 | 1.03 | 1.05 | 23.06  | 10.01 |
| F6XQM2 | Pleckstrin homology domain-containing family O member 1 (Fragment) OS=Mus musculus GN=Plekho1 PE=2 SV=1 - [F6XQM2_MOUSE] | 24.11 | 2 | 5  | 5  | 7   | 1.01 | 0.93 | 1.10 | 0.93  | 0.95  | 0.96 | 1.08 | 0.96 | 1.03 | 0.90 | 1.13 | 0.96 | 1.02 | 41.10  | 8.03  |
| Q9JKY5 | Huntingtin-interacting protein 1-related protein OS=Mus musculus GN=Hip1r PE=1 SV=2 - [HIP1R_MOUSE]                      | 21.72 | 1 | 18 | 18 | 38  | 0.98 | 1.09 | 1.14 | 1.16  | 1.20  | 0.93 | 0.96 | 0.96 | 1.00 | 1.02 | 1.03 | 1.00 | 1.06 | 119.35 | 6.52  |
| G3UW30 | 1,4-alpha-glucan-branching enzyme OS=Mus musculus GN=Gbe1 PE=4 SV=1 - [G3UW30_MOUSE]                                     | 6.21  | 3 | 3  | 3  | 5   | 1.04 | 1.15 | 1.11 | 1.11  | 1.15  | 0.93 | 0.96 | 0.96 | 0.94 | 1.01 | 1.02 | 1.04 | 0.96 | 75.60  | 6.55  |
| Q9CR68 | Cytochrome b-c1 complex subunit Rieske, mitochondrial OS=Mus musculus GN=Uqcrf1 PE=1 SV=1 - [UCRI_MOUSE]                 | 61.68 | 1 | 14 | 14 | 119 | 1.05 | 0.96 | 0.94 | 0.92  | 0.91  | 0.89 | 0.95 | 0.96 | 0.91 | 0.87 | 0.85 | 0.89 | 0.97 | 29.35  | 8.70  |
| Q6I6G8 | E3 ubiquitin-protein ligase HECW2 OS=Mus musculus GN=Hecw2 PE=2 SV=1 - [HECW2_MOUSE]                                     | 6.02  | 2 | 5  | 5  | 10  | 0.93 | 0.91 | 1.02 | 1.09  | 1.10  | 0.97 | 1.02 | 0.96 | 1.05 | 0.99 | 1.05 | 1.11 | 1.20 | 176.13 | 5.41  |
| Q9D428 | Golgin subfamily A member 7B OS=Mus musculus GN=GOLGA7B PE=2 SV=1 - [GOG7B_MOUSE]                                        | 18.56 | 1 | 3  | 3  | 7   | 1.02 | 1.10 | 1.09 | 1.00  | 0.97  | 0.89 | 0.87 | 0.96 | 0.92 | 0.86 | 0.88 | 0.75 | 0.79 | 18.32  | 6.01  |
| Q9ERE2 | Keratin, type II cuticular Hb1 (Fragment) OS=Mus musculus GN=Krt81 PE=2 SV=1 - [KRT81_MOUSE]                             | 9.49  | 6 | 2  | 4  | 43  | 0.99 | 1.15 | 0.84 | 22.49 | 25.87 | 1.30 | 1.12 | 0.96 | 0.97 | 1.18 | 0.86 | 1.06 | 0.95 | 43.73  | 5.20  |
| Q9CY64 | Biliverdin reductase A OS=Mus musculus GN=Blvra PE=2 SV=1 - [BIEA_MOUSE]                                                 | 39.32 | 4 | 10 | 10 | 15  | 1.04 | 0.98 | 0.91 | 1.09  | 1.01  | 0.97 | 0.94 | 0.96 | 0.90 | 0.93 | 0.88 | 1.05 | 0.99 | 33.50  | 7.02  |

|          |                                                                                                          |       |    |    |    |     |      |      |      |      |      |      |      |      |      |      |      |      |      |        |       |
|----------|----------------------------------------------------------------------------------------------------------|-------|----|----|----|-----|------|------|------|------|------|------|------|------|------|------|------|------|------|--------|-------|
| Q8K337-3 | Isoform 3 of Type II inositol 1,4,5-trisphosphate 5-phosphatase OS=Mus musculus GN=Inpp5b - [ISP2_MOUSE] | 2.16  | 2  | 1  | 1  | 2   | 0.97 | 1.35 | 1.38 | 0.92 | 0.94 | 0.98 | 1.00 | 0.96 | 0.98 | 0.99 | 1.02 | 1.33 | 1.37 | 84.83  | 6.35  |
| Q64237   | Dopamine beta-hydroxylase OS=Mus musculus GN=Dbh PE=2 SV=1 - [DOPO_MOUSE]                                | 3.38  | 2  | 2  | 2  | 4   | 1.11 | 1.24 | 1.12 | 1.11 | 1.00 | 0.95 | 0.85 | 0.96 | 0.86 | 0.97 | 0.88 | 1.11 | 1.00 | 70.14  | 6.10  |
| D3Z5N5   | 1-phosphatidylinositol 3-phosphate 5-kinase OS=Mus musculus GN=Pikfyve PE=2 SV=2 - [D3Z5N5_MOUSE]        | 2.92  | 4  | 4  | 4  | 12  | 0.96 | 1.26 | 1.08 | 1.09 | 1.02 | 1.09 | 1.23 | 0.96 | 1.02 | 1.14 | 1.21 | 1.04 | 1.00 | 231.93 | 6.64  |
| Q3KQM4   | Splicing factor U2AF 65 kDa subunit OS=Mus musculus GN=U2af2 PE=2 SV=1 - [Q3KQM4_MOUSE]                  | 36.48 | 2  | 8  | 8  | 22  | 1.08 | 0.83 | 0.79 | 0.97 | 0.90 | 0.82 | 0.79 | 0.96 | 0.92 | 0.84 | 0.85 | 0.92 | 0.85 | 33.88  | 5.03  |
| P25444   | 40S ribosomal protein S2 OS=Mus musculus GN=Rps2 PE=1 SV=3 - [RS2_MOUSE]                                 | 36.52 | 11 | 10 | 10 | 25  | 0.95 | 0.82 | 0.87 | 1.14 | 1.18 | 1.02 | 1.04 | 0.96 | 1.02 | 1.00 | 1.04 | 1.00 | 1.03 | 31.21  | 10.24 |
| Q8BVR6   | Isoform 3 of RING finger and SPRY domain-containing protein 1 OS=Mus musculus GN=Rspry1 - [RSPRY_MOUSE]  | 1.77  | 2  | 1  | 1  | 2   | 1.06 | 1.33 | 1.26 | 1.15 | 1.08 | 0.87 | 0.82 | 0.96 | 0.90 | 1.10 | 1.04 | 1.18 | 1.12 | 50.77  | 5.35  |
| Q62086   | Serum paraoxonase/arylesterase 2 OS=Mus musculus GN=Pon2 PE=1 SV=2 - [PON2_MOUSE]                        | 4.80  | 1  | 1  | 1  | 2   | 1.26 | 1.10 | 0.88 | 1.12 | 0.89 | 0.81 | 0.64 | 0.96 | 0.76 | 0.96 | 0.77 | 1.24 | 0.99 | 39.59  | 5.83  |
| P68404-2 | Isoform Beta-II of Protein kinase C beta type OS=Mus musculus GN=Prkcb - [KPCB_MOUSE]                    | 50.97 | 5  | 3  | 29 | 179 | 0.88 | 0.96 | 1.04 | 1.01 | 1.14 | 1.00 | 1.09 | 0.96 | 1.07 | 0.99 | 1.05 | 0.96 | 1.04 | 76.84  | 7.02  |
| Q91YP0   | L-2-hydroxyglutarate dehydrogenase, mitochondrial OS=Mus musculus GN=L2hgdh PE=2 SV=1 - [L2HDH_MOUSE]    | 24.35 | 1  | 9  | 9  | 20  | 0.97 | 1.26 | 1.17 | 1.07 | 1.00 | 0.87 | 0.90 | 0.96 | 0.93 | 1.01 | 0.98 | 0.95 | 1.03 | 50.87  | 8.29  |
| D3YVP6   | Glutathione S-transferase Mu 7 OS=Mus musculus GN=Gstm7 PE=2 SV=2 - [D3YVP6_MOUSE]                       | 59.12 | 13 | 7  | 11 | 34  | 0.99 | 1.02 | 1.12 | 1.09 | 1.06 | 1.00 | 0.94 | 0.96 | 0.98 | 1.03 | 1.01 | 1.16 | 1.11 | 21.31  | 8.35  |
| Q99K48   | Non-POU domain-containing octamer-binding protein OS=Mus musculus GN=Nono PE=1 SV=3 - [NONO_MOUSE]       | 41.86 | 3  | 15 | 16 | 102 | 0.91 | 0.98 | 1.04 | 0.92 | 0.99 | 0.86 | 0.96 | 0.96 | 1.00 | 0.88 | 0.95 | 0.95 | 1.05 | 54.51  | 8.95  |

|          |                                                                                                                |       |    |    |    |     |      |      |      |      |      |      |      |      |      |      |      |      |      |        |      |
|----------|----------------------------------------------------------------------------------------------------------------|-------|----|----|----|-----|------|------|------|------|------|------|------|------|------|------|------|------|------|--------|------|
| D3Z6K8   | Ras-specific guanine nucleotide-releasing factor 2 OS=Mus musculus GN=Rasgrf2 PE=2 SV=2 - [D3Z6K8_MOUSE]       | 10.27 | 6  | 9  | 10 | 26  | 1.08 | 1.32 | 1.30 | 1.17 | 1.09 | 0.96 | 0.97 | 0.96 | 0.93 | 1.02 | 0.95 | 1.05 | 0.93 | 136.02 | 7.97 |
| Q9DBR1   | Isoform 2 of 5'-3' exoribonuclease 2 OS=Mus musculus GN=Xm2 - [XRN2_MOUSE]                                     | 2.43  | 2  | 2  | 2  | 2   | 1.01 | 1.42 | 1.41 | 0.91 | 0.90 | 1.00 | 0.99 | 0.96 | 0.95 | 0.98 | 0.97 | 0.99 | 0.99 | 108.04 | 7.25 |
| F8WGL3   | Cofilin-1 OS=Mus musculus GN=Cf1 PE=2 SV=1 - [F8WGL3_MOUSE]                                                    | 52.86 | 1  | 1  | 22 | 907 | 0.63 | 0.55 | 0.87 | 0.98 | 1.55 | 0.99 | 1.56 | 0.96 | 1.51 | 0.91 | 1.45 | 0.56 | 0.89 | 24.56  | 8.03 |
| Q64511   | DNA topoisomerase 2-beta OS=Mus musculus GN=Top2b PE=1 SV=2 - [TOP2B_MOUSE]                                    | 8.93  | 17 | 11 | 13 | 25  | 0.99 | 1.05 | 1.03 | 1.01 | 1.04 | 0.93 | 0.96 | 0.96 | 0.97 | 0.97 | 0.99 | 0.94 | 1.04 | 181.80 | 8.29 |
| Q61699   | Heat shock protein 105 kDa OS=Mus musculus GN=Hsp1 PE=1 SV=2 - [HS105_MOUSE]                                   | 49.53 | 5  | 31 | 34 | 143 | 0.93 | 0.92 | 0.97 | 1.04 | 1.11 | 0.94 | 0.99 | 0.96 | 1.01 | 0.99 | 1.05 | 0.97 | 1.03 | 96.35  | 5.53 |
| D3Z3R3   | Thymidylate kinase OS=Mus musculus GN=Dtymk PE=2 SV=1 - [D3Z3R3_MOUSE]                                         | 15.58 | 2  | 2  | 2  | 3   | 0.97 | 0.87 | 0.89 | 1.09 | 1.12 | 0.91 | 0.93 | 0.96 | 0.98 | 0.91 | 0.94 | 0.96 | 0.99 | 17.61  | 7.97 |
| E9PZJ2   | Interferon regulatory factor 9 OS=Mus musculus GN=Irf9 PE=2 SV=1 - [E9PZJ2_MOUSE]                              | 7.74  | 1  | 1  | 1  | 1   | 0.97 | 0.69 | 0.71 | 1.05 | 1.08 | 1.12 | 1.15 | 0.96 | 0.98 | 1.00 | 1.04 | 0.89 | 0.92 | 51.45  | 7.53 |
| O55137   | Acyl-coenzyme A thioesterase 1 OS=Mus musculus GN=Acot1 PE=1 SV=1 - [ACOT1_MOUSE]                              | 21.72 | 8  | 4  | 7  | 18  | 0.77 | 0.81 | 1.10 | 1.01 | 1.22 | 1.03 | 1.23 | 0.96 | 1.22 | 0.91 | 1.18 | 0.94 | 1.14 | 46.11  | 6.58 |
| Q9WV19   | Isoform JIP-1e of C-Jun-amino-terminal kinase-interacting protein 1 OS=Mus musculus GN=Mapk8ip1 - [JIP1_MOUSE] | 2.11  | 5  | 1  | 1  | 2   | 0.93 | 0.99 | 1.06 | 0.83 | 0.90 | 0.91 | 0.98 | 0.96 | 1.03 | 1.08 | 1.17 | 0.89 | 0.96 | 67.96  | 5.05 |
| Q6NS52-2 | Isoform 2 of Diacylglycerol kinase beta OS=Mus musculus GN=Dgkb - [DGKB_MOUSE]                                 | 14.97 | 1  | 1  | 10 | 20  | 1.14 | 0.95 | 0.84 | 1.02 | 0.90 | 1.10 | 0.96 | 0.96 | 0.84 | 1.00 | 0.88 | 1.11 | 0.98 | 89.37  | 7.93 |
| Q68FL6   | Methionine-tRNA ligase, cytoplasmic OS=Mus musculus GN=Mars PE=2 SV=1 - [SYMC_MOUSE]                           | 12.97 | 3  | 10 | 10 | 19  | 0.96 | 1.11 | 1.13 | 1.03 | 1.09 | 0.95 | 1.03 | 0.96 | 0.96 | 0.96 | 0.99 | 0.95 | 1.06 | 101.37 | 7.14 |
| Q9Z2D1   | Myotubularin-related protein 2 OS=Mus musculus GN=Mtmr2 PE=1 SV=3 - [MTMR2_MOUSE]                              | 14.15 | 4  | 6  | 6  | 9   | 1.04 | 1.30 | 1.25 | 1.09 | 1.12 | 1.04 | 0.92 | 0.96 | 0.90 | 1.00 | 0.95 | 1.02 | 0.99 | 73.19  | 7.25 |

|          |                                                                                                                               |       |   |    |    |    |      |      |      |      |      |      |      |      |      |      |      |      |      |        |      |
|----------|-------------------------------------------------------------------------------------------------------------------------------|-------|---|----|----|----|------|------|------|------|------|------|------|------|------|------|------|------|------|--------|------|
| B2RY56   | RNA-binding protein 25 OS=Mus musculus GN=Rbm25 PE=1 SV=2 - [RBM25_MOUSE]                                                     | 15.16 | 1 | 10 | 10 | 24 | 0.90 | 0.81 | 0.93 | 0.92 | 1.02 | 0.95 | 1.03 | 0.96 | 1.18 | 0.82 | 0.98 | 0.82 | 0.92 | 99.49  | 6.32 |
| Q9CWD8   | Iron-sulfur protein NUBPL OS=Mus musculus GN=Nubpl PE=2 SV=2 - [NUBPL_MOUSE]                                                  | 6.27  | 1 | 1  | 1  | 1  | 0.91 | 1.34 | 1.48 | 0.94 | 1.03 | 1.15 | 1.26 | 0.96 | 1.05 | 0.78 | 0.86 | 0.80 | 0.88 | 34.12  | 9.07 |
| P30935   | Somatostatin receptor type 3 OS=Mus musculus GN=Sstr3 PE=2 SV=2 - [SSR3_MOUSE]                                                | 3.27  | 1 | 1  | 1  | 1  | 1.25 | 1.25 | 1.00 | 1.19 | 0.95 | 1.01 | 0.80 | 0.96 | 0.76 | 1.10 | 0.88 | 1.10 | 0.88 | 47.19  | 8.59 |
| P12849   | cAMP-dependent protein kinase type I-beta regulatory subunit OS=Mus musculus GN=Prkar1b PE=2 SV=2 - [KAP1_MOUSE]              | 25.98 | 8 | 5  | 9  | 16 | 0.92 | 0.92 | 1.04 | 1.03 | 1.10 | 0.95 | 1.03 | 0.96 | 1.02 | 1.04 | 1.03 | 0.88 | 0.94 | 43.20  | 5.96 |
| P59644   | Phosphatidylinositol 4,5-bisphosphate 5-phosphatase A OS=Mus musculus GN=Inpp5j PE=1 SV=2 - [PI5PA_MOUSE]                     | 10.47 | 2 | 7  | 7  | 17 | 0.93 | 0.93 | 0.97 | 1.00 | 1.12 | 1.01 | 1.22 | 0.96 | 1.10 | 0.96 | 1.12 | 0.95 | 1.00 | 107.48 | 9.36 |
| Q9JJY3   | Sphingomyelin phosphodiesterase 3 OS=Mus musculus GN=Smpd3 PE=1 SV=1 - [NSMA2_MOUSE]                                          | 10.38 | 1 | 6  | 6  | 11 | 1.04 | 1.12 | 1.05 | 1.26 | 1.17 | 0.95 | 0.91 | 0.96 | 0.87 | 1.18 | 1.10 | 1.23 | 1.08 | 71.15  | 5.88 |
| Q9D394-4 | Isoform 4 of Protein RUFY3 OS=Mus musculus GN=Rufy3 - [RUFY3_MOUSE]                                                           | 35.65 | 3 | 1  | 15 | 59 | 0.72 | 0.64 | 1.01 | 0.89 | 1.24 | 0.88 | 1.15 | 0.96 | 1.26 | 0.91 | 1.10 | 0.87 | 1.14 | 57.42  | 5.85 |
| D3Z0M9   | MCG18410, isoform CRA_a OS=Mus musculus GN=Ddx23 PE=3 SV=1 - [D3Z0M9_MOUSE]                                                   | 5.86  | 1 | 4  | 4  | 10 | 0.90 | 0.91 | 1.01 | 0.99 | 1.05 | 1.00 | 1.10 | 0.96 | 1.19 | 1.01 | 1.02 | 1.03 | 1.14 | 95.44  | 9.58 |
| Q61627   | Glutamate receptor ionotropic, delta-1 OS=Mus musculus GN=Crid1 PE=1 SV=2 - [GRID1_MOUSE]                                     | 4.16  | 1 | 4  | 4  | 6  | 1.04 | 0.96 | 0.92 | 1.04 | 0.97 | 1.05 | 0.94 | 0.96 | 0.96 | 1.01 | 0.97 | 1.03 | 0.97 | 112.14 | 6.70 |
| Q3UMB5   | Smith-Magenis syndrome chromosomal region candidate gene 8 protein homolog OS=Mus musculus GN=Smer8 PE=1 SV=2 - [SMCR8_MOUSE] | 4.60  | 2 | 3  | 3  | 4  | 1.08 | 1.27 | 1.15 | 1.11 | 1.05 | 0.97 | 0.89 | 0.96 | 0.86 | 1.07 | 0.96 | 1.09 | 0.99 | 104.89 | 5.40 |
| E9QM38   | Solute carrier family 12 member 2 OS=Mus musculus GN=Slc12a2 PE=4 SV=1 - [E9QM38_MOUSE]                                       | 15.26 | 2 | 11 | 11 | 41 | 0.98 | 0.98 | 0.99 | 1.00 | 1.01 | 0.92 | 0.95 | 0.96 | 0.95 | 0.96 | 1.00 | 0.95 | 0.96 | 130.59 | 6.52 |

|          |                                                                                                                                           |       |    |    |    |     |      |      |      |      |      |      |      |      |      |      |      |      |      |        |      |
|----------|-------------------------------------------------------------------------------------------------------------------------------------------|-------|----|----|----|-----|------|------|------|------|------|------|------|------|------|------|------|------|------|--------|------|
| P36916   | Guanine nucleotide-binding protein-like 1<br>OS=Mus musculus<br>GN=Gnl1 PE=1 SV=4 -<br>[GNL1_MOUSE]                                       | 23.39 | 2  | 12 | 12 | 27  | 0.98 | 1.07 | 1.03 | 1.10 | 1.06 | 0.98 | 1.01 | 0.96 | 0.97 | 1.00 | 1.00 | 1.04 | 1.02 | 68.73  | 5.68 |
| Q99K01-3 | Isoform 3 of Pyridoxal-dependent<br>decarboxylase domain-containing protein 1<br>OS=Mus musculus<br>GN=Pdxcd1 -<br>[PDXD1_MOUSE]          | 7.32  | 6  | 5  | 5  | 10  | 0.94 | 1.07 | 1.05 | 1.08 | 1.16 | 0.92 | 0.99 | 0.96 | 1.00 | 0.97 | 1.03 | 1.02 | 1.07 | 78.49  | 5.54 |
| B0R058   | Glycerophosphocholine<br>phosphodiesterase<br>GPCPD1 OS=Mus<br>musculus GN=Gpcpd1<br>PE=2 SV=1 -<br>[B0R058_MOUSE]                        | 24.55 | 4  | 8  | 8  | 14  | 1.08 | 1.04 | 1.12 | 1.01 | 0.93 | 0.96 | 0.91 | 0.96 | 0.92 | 0.93 | 0.94 | 1.05 | 1.01 | 50.66  | 6.34 |
| Q7TSV4   | Phosphoglucomutase-2<br>OS=Mus musculus<br>GN=Pgm2 PE=1 SV=1 -<br>[PGM2_MOUSE]                                                            | 7.10  | 1  | 3  | 3  | 5   | 0.93 | 0.83 | 0.89 | 0.94 | 1.06 | 0.89 | 0.99 | 0.96 | 1.02 | 0.87 | 0.92 | 0.84 | 0.95 | 68.70  | 6.14 |
| Q8VDJ3   | Vigilin OS=Mus<br>musculus GN=Hdlbp<br>PE=1 SV=1 -<br>[VIGLN_MOUSE]                                                                       | 22.08 | 1  | 19 | 19 | 42  | 0.96 | 0.98 | 1.03 | 0.95 | 1.06 | 0.95 | 1.04 | 0.96 | 1.00 | 1.00 | 1.04 | 0.95 | 1.03 | 141.66 | 6.87 |
| Q8BIZ1   | Ankyrin repeat and<br>sterile alpha motif<br>domain-containing<br>protein 1B OS=Mus<br>musculus GN=Anks1b<br>PE=1 SV=3 -<br>[ANS1B_MOUSE] | 8.90  | 8  | 2  | 10 | 22  | 1.22 | 1.12 | 0.84 | 1.09 | 0.90 | 1.03 | 0.91 | 0.96 | 0.85 | 1.10 | 0.91 | 1.14 | 1.02 | 138.96 | 6.29 |
| F7ABZ6   | Protein Dnah10<br>(Fragment) OS=Mus<br>musculus GN=Dnah10<br>PE=4 SV=1 -<br>[F7ABZ6_MOUSE]                                                | 0.37  | 2  | 1  | 2  | 2   | 0.96 | 1.03 | 1.07 | 0.97 | 1.01 | 1.03 | 1.07 | 0.96 | 1.00 | 0.92 | 0.96 | 0.90 | 0.94 | 502.47 | 5.94 |
| B1ARU4   | Microtubule-actin cross-<br>linking factor 1<br>OS=Mus musculus<br>GN=Macf1 PE=2<br>SV=1 -<br>[B1ARU4_MOUSE]                              | 15.00 | 18 | 84 | 86 | 168 | 0.93 | 1.00 | 1.03 | 1.07 | 1.15 | 0.95 | 1.02 | 0.96 | 1.01 | 0.99 | 1.05 | 1.01 | 1.10 | 831.13 | 5.41 |
| D3Z494   | MCGI42264, isoform<br>CRA_a OS=Mus<br>musculus<br>GN=Akr1b10 PE=4<br>SV=1 -<br>[D3Z494_MOUSE]                                             | 29.17 | 7  | 3  | 6  | 10  | 1.20 | 0.99 | 0.83 | 1.41 | 1.17 | 1.08 | 0.90 | 0.96 | 0.80 | 1.07 | 0.89 | 1.13 | 0.95 | 32.73  | 7.01 |
| O35393   | Ephrin-B3 OS=Mus<br>musculus GN=Efnb3<br>PE=1 SV=1 -<br>[EFNB3_MOUSE]                                                                     | 16.18 | 1  | 3  | 3  | 7   | 0.96 | 1.06 | 0.99 | 0.95 | 0.90 | 0.98 | 1.01 | 0.96 | 0.90 | 1.01 | 0.96 | 1.04 | 0.92 | 35.86  | 8.25 |
| Q91VA6   | Polymerase delta-<br>interacting protein 2<br>OS=Mus musculus<br>GN=Poldip2 PE=2<br>SV=1 -<br>[PDIP2_MOUSE]                               | 24.73 | 2  | 6  | 6  | 9   | 0.99 | 0.97 | 1.00 | 1.05 | 1.05 | 0.87 | 0.87 | 0.96 | 0.89 | 0.98 | 0.91 | 0.86 | 0.93 | 41.84  | 8.63 |
| Q07409   | Contactin-3 OS=Mus<br>musculus GN=Cntn3<br>PE=2 SV=2 -<br>[CNTN3_MOUSE]                                                                   | 13.91 | 1  | 10 | 11 | 28  | 0.99 | 1.12 | 1.16 | 1.07 | 1.10 | 0.99 | 1.00 | 0.96 | 0.99 | 0.91 | 0.96 | 1.01 | 1.03 | 113.16 | 6.23 |

|          |                                                                                                                                |       |   |   |   |    |      |      |      |      |      |      |      |      |      |      |      |      |      |        |       |
|----------|--------------------------------------------------------------------------------------------------------------------------------|-------|---|---|---|----|------|------|------|------|------|------|------|------|------|------|------|------|------|--------|-------|
| H3BKJ6   | POU domain, class 6, transcription factor 1<br>OS=Mus musculus<br>GN=Pou6f1 PE=4<br>SV=1 -<br>[H3BKJ6_MOUSE]                   | 37.93 | 5 | 2 | 2 | 6  | 0.78 | 0.69 | 0.89 | 0.83 | 0.95 | 1.20 | 1.48 | 0.96 | 1.17 | 0.96 | 1.11 | 0.79 | 0.92 | 14.67  | 4.31  |
| Q8BFP9   | [Pyruvate dehydrogenase (lipoamide)] kinase isozyme 1, mitochondrial<br>OS=Mus musculus<br>GN=Pdk1 PE=2 SV=2 -<br>[PDK1_MOUSE] | 25.58 | 1 | 8 | 8 | 17 | 0.98 | 1.13 | 1.12 | 1.00 | 1.15 | 0.91 | 0.99 | 0.96 | 0.92 | 1.05 | 1.00 | 1.04 | 1.05 | 48.96  | 8.19  |
| Q8OU87   | Ubiquitin carboxyl-terminal hydrolase 8<br>OS=Mus musculus<br>GN=Usp8 PE=1 SV=2 -<br>[UBP8_MOUSE]                              | 6.85  | 2 | 6 | 6 | 10 | 1.00 | 1.00 | 1.01 | 0.99 | 1.06 | 0.76 | 0.81 | 0.96 | 0.97 | 0.99 | 0.92 | 0.86 | 1.02 | 122.53 | 8.47  |
| Q8BGC4   | Zinc-binding alcohol dehydrogenase domain-containing protein 2<br>OS=Mus musculus<br>GN=Zadh2 PE=2<br>SV=1 -<br>[ZADH2_MOUSE]  | 10.34 | 1 | 3 | 3 | 6  | 0.85 | 1.24 | 1.46 | 1.12 | 1.09 | 0.91 | 0.92 | 0.96 | 0.98 | 0.94 | 1.05 | 0.90 | 0.98 | 40.50  | 7.42  |
| Q8OU95   | Ubiquitin-protein ligase E3C<br>OS=Mus musculus<br>GN=Ube3c PE=2 SV=2 -<br>[UBE3C_MOUSE]                                       | 3.05  | 1 | 3 | 3 | 4  | 1.06 | 1.26 | 1.20 | 1.21 | 1.14 | 0.98 | 0.92 | 0.96 | 0.91 | 1.07 | 1.02 | 1.26 | 1.16 | 123.90 | 6.39  |
| Q8K2J7-2 | Isoform 2 of RELT-like protein 1<br>OS=Mus musculus<br>GN=Rel1 -<br>[RELL1_MOUSE]                                              | 20.79 | 2 | 4 | 4 | 6  | 1.06 | 1.16 | 1.11 | 1.05 | 0.85 | 1.33 | 0.94 | 0.96 | 0.86 | 1.15 | 1.07 | 0.84 | 0.79 | 22.25  | 8.34  |
| Q9ESP1   | Stromal cell-derived factor 2-like protein 1<br>OS=Mus musculus<br>GN=Sdf2l1 PE=2<br>SV=2 -<br>[SDF2L_MOUSE]                   | 25.79 | 1 | 3 | 3 | 7  | 0.83 | 0.80 | 0.92 | 0.92 | 1.06 | 1.00 | 1.23 | 0.96 | 1.16 | 1.03 | 1.15 | 0.93 | 1.03 | 23.63  | 7.42  |
| F6U5Y4   | Protein Auts2 (Fragment)<br>OS=Mus musculus<br>GN=Auts2 PE=4 SV=1 -<br>[F6U5Y4_MOUSE]                                          | 6.90  | 4 | 1 | 1 | 1  | 1.15 | 1.36 | 1.18 | 1.01 | 0.87 | 1.00 | 0.87 | 0.96 | 0.83 | 1.03 | 0.89 | 1.16 | 1.01 | 16.18  | 10.26 |
| Q60857   | Sodium-dependent serotonin transporter<br>OS=Mus musculus<br>GN=Slc6a4 PE=1<br>SV=4 -<br>[SC6A4_MOUSE]                         | 2.54  | 1 | 1 | 1 | 2  | 1.12 | 1.36 | 1.21 | 1.14 | 1.01 | 1.24 | 1.10 | 0.96 | 0.85 | 1.43 | 1.28 | 1.43 | 1.28 | 70.00  | 6.18  |
| Q0P538   | B-cell leukemia/lymphoma 2 related protein A1c<br>OS=Mus musculus<br>GN=Bel2a1c PE=2<br>SV=1 -<br>[Q0P538_MOUSE]               | 15.63 | 1 | 1 | 1 | 2  | 1.00 | 0.74 | 0.74 | 1.00 | 1.00 | 0.77 | 0.77 | 0.96 | 0.95 | 0.87 | 0.86 | 0.95 | 0.95 | 14.78  | 6.79  |



|        |                                                                                                                       |       |    |    |    |     |      |      |      |      |      |      |      |      |      |      |      |      |      |        |      |
|--------|-----------------------------------------------------------------------------------------------------------------------|-------|----|----|----|-----|------|------|------|------|------|------|------|------|------|------|------|------|------|--------|------|
| B2KF34 | Mitogen-activated protein kinase 14 (Fragment) OS=Mus musculus GN=Mapk14 PE=2 SV=1 - [B2KF34_MOUSE]                   | 7.88  | 16 | 1  | 2  | 2   | 1.04 | 1.11 | 1.07 | 1.05 | 1.01 | 1.04 | 1.00 | 0.96 | 0.92 | 1.11 | 1.07 | 1.13 | 1.09 | 23.69  | 8.27 |
| O08529 | Calpain-2 catalytic subunit OS=Mus musculus GN=Capn2 PE=2 SV=4 - [CAN2_MOUSE]                                         | 36.00 | 1  | 17 | 17 | 31  | 1.05 | 0.90 | 0.91 | 1.08 | 1.05 | 0.92 | 0.90 | 0.96 | 1.00 | 0.97 | 0.91 | 1.01 | 1.07 | 79.82  | 4.96 |
| Q8R3Q0 | Store-operated calcium entry-associated regulatory factor OS=Mus musculus GN=Tmem66 PE=2 SV=2 - [SARAF_MOUSE]         | 8.68  | 1  | 2  | 2  | 3   | 1.03 | 1.72 | 1.67 | 1.23 | 1.20 | 0.97 | 0.94 | 0.96 | 0.93 | 1.13 | 1.10 | 0.97 | 0.95 | 35.83  | 8.19 |
| Q9JK42 | [Pyruvate dehydrogenase [lipoamide]] kinase isozyme 2, mitochondrial OS=Mus musculus GN=Pdk2 PE=1 SV=2 - [PDK2_MOUSE] | 24.82 | 1  | 6  | 7  | 10  | 1.10 | 0.89 | 0.90 | 1.17 | 1.09 | 0.95 | 0.94 | 0.96 | 0.96 | 0.96 | 0.94 | 1.08 | 1.09 | 46.01  | 6.61 |
| P26443 | Glutamate dehydrogenase 1, mitochondrial OS=Mus musculus GN=Glud1 PE=1 SV=1 - [DHE3_MOUSE]                            | 54.84 | 3  | 29 | 29 | 229 | 1.02 | 1.02 | 1.00 | 1.06 | 1.04 | 0.98 | 0.97 | 0.96 | 0.95 | 1.05 | 1.03 | 1.07 | 1.08 | 61.30  | 8.00 |
| Q81110 | ATP synthase mitochondrial F1 complex assembly factor 1 OS=Mus musculus GN=Atpaf1 PE=2 SV=1 - [ATPF1_MOUSE]           | 13.27 | 7  | 3  | 3  | 5   | 1.09 | 1.14 | 1.00 | 1.05 | 0.96 | 1.10 | 1.02 | 0.96 | 0.86 | 0.93 | 0.81 | 1.10 | 0.97 | 36.33  | 8.19 |
| P32233 | Developmentally-regulated GTP-binding protein 1 OS=Mus musculus GN=Drg1 PE=1 SV=1 - [DRG1_MOUSE]                      | 18.53 | 1  | 5  | 5  | 7   | 1.00 | 1.04 | 1.04 | 0.98 | 1.05 | 0.98 | 0.95 | 0.96 | 0.94 | 1.10 | 1.01 | 1.00 | 0.94 | 40.49  | 8.90 |
| P16054 | Protein kinase C epsilon type OS=Mus musculus GN=Pkcce PE=1 SV=1 - [KPCE_MOUSE]                                       | 42.74 | 5  | 22 | 23 | 78  | 0.98 | 0.99 | 1.03 | 1.02 | 1.05 | 0.93 | 1.00 | 0.96 | 0.97 | 0.97 | 1.00 | 0.98 | 1.04 | 83.51  | 7.03 |
| Q8VCA8 | Secernin-2 OS=Mus musculus GN=Sern2 PE=2 SV=1 - [SCRN2_MOUSE]                                                         | 8.47  | 2  | 2  | 2  | 3   | 1.05 | 1.04 | 0.99 | 1.12 | 1.06 | 0.94 | 0.89 | 0.96 | 0.91 | 1.22 | 1.16 | 1.03 | 0.98 | 46.57  | 5.71 |
| Q4VA53 | Sister chromatid cohesion protein PDS5 homolog B OS=Mus musculus GN=Pds5b PE=1 SV=1 - [PDS5B_MOUSE]                   | 4.22  | 4  | 4  | 5  | 11  | 0.95 | 1.08 | 1.02 | 1.23 | 1.23 | 1.01 | 0.96 | 0.96 | 1.04 | 1.03 | 1.20 | 1.10 | 0.96 | 164.32 | 8.50 |
| Q9QU10 | Transforming protein RhoA OS=Mus musculus GN=Rhoa PE=1 SV=1 - [RHOA_MOUSE]                                            | 73.06 | 4  | 9  | 11 | 96  | 1.04 | 0.99 | 0.95 | 1.06 | 0.98 | 1.00 | 0.96 | 0.96 | 0.91 | 0.98 | 0.90 | 1.07 | 0.95 | 21.77  | 6.10 |

|          |                                                                                                                                      |       |   |    |    |    |      |      |      |      |      |      |      |      |      |      |      |      |      |        |      |
|----------|--------------------------------------------------------------------------------------------------------------------------------------|-------|---|----|----|----|------|------|------|------|------|------|------|------|------|------|------|------|------|--------|------|
| Q6V3W6   | Isoform 2 of Coiled-coil domain-containing protein lobo homolog<br>OS=Mus musculus<br>GN=Ccd135 -<br>[CC135_MOUSE]                   | 8.14  | 2 | 1  | 1  | 1  | 0.64 | 0.57 | 0.89 | 0.91 | 1.41 | 0.74 | 1.14 | 0.96 | 1.49 | 0.44 | 0.68 | 0.66 | 1.03 | 33.76  | 5.19 |
| P51791-2 | Isoform 2 of H(+)/Cl(-) exchange transporter 3<br>OS=Mus musculus<br>GN=Clcn3 -<br>[CLCN3_MOUSE]                                     | 5.79  | 5 | 3  | 3  | 5  | 1.16 | 1.19 | 1.02 | 1.50 | 1.29 | 1.09 | 0.93 | 0.96 | 0.82 | 1.08 | 0.93 | 1.03 | 0.88 | 84.42  | 7.25 |
| D3YTT7   | 40S ribosomal protein SA<br>OS=Mus musculus<br>GN=Rpsa-ps10 PE=3<br>SV=1 -<br>[D3YTT7_MOUSE]                                         | 41.36 | 2 | 7  | 7  | 27 | 1.02 | 1.02 | 1.06 | 1.05 | 1.08 | 1.00 | 0.95 | 0.96 | 0.90 | 1.02 | 1.06 | 1.04 | 1.06 | 32.82  | 4.93 |
| Q9DCT2   | NADH dehydrogenase [ubiquinone] iron-sulfur protein 3, mitochondrial<br>OS=Mus musculus<br>GN=Ndufs3<br>PE=1 SV=2 -<br>[NDUS3_MOUSE] | 43.35 | 1 | 13 | 13 | 60 | 0.97 | 1.01 | 1.02 | 1.01 | 1.06 | 0.99 | 1.00 | 0.96 | 1.05 | 0.92 | 0.96 | 0.93 | 0.99 | 30.13  | 7.17 |
| Q8BXQ0   | Ethanolamine kinase 1<br>OS=Mus musculus<br>GN=Etnk1 PE=2<br>SV=1 -<br>[Q8BXQ0_MOUSE]                                                | 3.31  | 2 | 1  | 1  | 2  | 0.92 | 1.24 | 1.34 | 1.15 | 1.24 | 0.96 | 1.04 | 0.96 | 1.04 | 1.25 | 1.36 | 1.24 | 1.35 | 41.96  | 5.44 |
| J3QNB1   | La-related protein 1<br>OS=Mus musculus<br>GN=Larp1 PE=4 SV=1<br>- [J3QNB1_MOUSE]                                                    | 22.29 | 2 | 16 | 16 | 34 | 0.95 | 0.93 | 0.91 | 0.90 | 0.94 | 1.01 | 0.97 | 0.96 | 0.97 | 0.94 | 0.97 | 0.90 | 0.96 | 121.05 | 8.79 |
| E0CXN5   | Glycerol-3-phosphate dehydrogenase [NAD(+)], cytoplasmic<br>OS=Mus musculus<br>GN=Gpd1 PE=2 SV=1<br>- [E0CXN5_MOUSE]                 | 37.12 | 2 | 11 | 11 | 34 | 0.87 | 0.87 | 0.94 | 0.99 | 1.15 | 0.98 | 1.11 | 0.96 | 1.12 | 0.90 | 1.02 | 0.93 | 1.06 | 35.21  | 7.59 |
| Q80TL1   | Adenylate cyclase type 2<br>OS=Mus musculus<br>GN=Adcy2 PE=2<br>SV=2 -<br>[ADCY2_MOUSE]                                              | 11.38 | 2 | 11 | 11 | 20 | 1.03 | 1.21 | 1.20 | 1.09 | 1.07 | 0.91 | 0.85 | 0.96 | 0.91 | 0.99 | 0.90 | 1.01 | 0.93 | 123.19 | 8.31 |
| Q8BNU0   | Isoform 2 of Armadillo repeat-containing protein 6<br>OS=Mus musculus<br>GN=Arm6 -<br>[ARMC6_MOUSE]                                  | 31.37 | 3 | 6  | 6  | 16 | 1.12 | 1.07 | 1.01 | 1.12 | 1.04 | 1.02 | 0.90 | 0.96 | 0.85 | 1.01 | 0.88 | 1.05 | 0.91 | 29.64  | 6.52 |
| D3Z7J6   | Translation initiation factor eIF-2B subunit beta (Fragment)<br>OS=Mus musculus<br>GN=Eif2b2 PE=2<br>SV=1 -<br>[D3Z7J6_MOUSE]        | 14.91 | 3 | 2  | 2  | 3  | 1.08 | 1.38 | 1.27 | 0.89 | 1.06 | 0.85 | 0.87 | 0.96 | 0.89 | 1.04 | 0.97 | 1.30 | 1.20 | 25.35  | 6.29 |

|          |                                                                                                                                       |       |   |    |    |     |      |      |      |      |      |      |      |      |      |      |      |      |      |        |      |
|----------|---------------------------------------------------------------------------------------------------------------------------------------|-------|---|----|----|-----|------|------|------|------|------|------|------|------|------|------|------|------|------|--------|------|
| Q5DTL9   | Sodium-driven chloride bicarbonate exchanger OS=Mus musculus GN=Slc4a10 PE=1 SV=2 - [S4A10_MOUSE]                                     | 26.57 | 1 | 19 | 23 | 95  | 0.92 | 1.05 | 1.17 | 1.12 | 1.26 | 0.95 | 0.97 | 0.96 | 1.10 | 0.94 | 1.05 | 0.89 | 1.00 | 125.74 | 6.51 |
| P42225   | Signal transducer and activator of transcription 1 OS=Mus musculus GN=Stat1 PE=1 SV=1 - [STAT1_MOUSE]                                 | 8.14  | 2 | 4  | 4  | 8   | 0.94 | 0.94 | 1.09 | 0.99 | 1.13 | 0.91 | 0.97 | 0.96 | 0.95 | 1.00 | 1.02 | 1.02 | 1.11 | 87.14  | 5.58 |
| Q69ZX8   | Actin-binding LIM protein 3 OS=Mus musculus GN=Ablim3 PE=1 SV=2 - [ABLM3_MOUSE]                                                       | 18.04 | 1 | 10 | 12 | 35  | 0.92 | 0.93 | 1.00 | 0.87 | 0.93 | 0.90 | 0.90 | 0.96 | 1.06 | 0.94 | 0.94 | 0.92 | 1.02 | 77.58  | 8.54 |
| Q8BIV3   | Ran-binding protein 6 OS=Mus musculus GN=Ranbp6 PE=2 SV=3 - [RBNP6_MOUSE]                                                             | 1.99  | 1 | 1  | 2  | 3   | 0.95 | 1.22 | 1.28 | 1.00 | 1.05 | 0.98 | 1.02 | 0.96 | 1.00 | 0.99 | 1.04 | 1.24 | 1.30 | 124.51 | 5.03 |
| Q9Z275   | Retinaldehyde-binding protein 1 OS=Mus musculus GN=Rlbp1 PE=2 SV=3 - [RLBP1_MOUSE]                                                    | 25.55 | 1 | 5  | 5  | 12  | 0.94 | 0.83 | 0.92 | 0.99 | 1.10 | 1.12 | 1.11 | 0.96 | 1.02 | 0.98 | 1.04 | 0.92 | 0.99 | 36.39  | 5.06 |
| Q9Z1T1   | AP-3 complex subunit beta-1 OS=Mus musculus GN=Ap3b1 PE=1 SV=2 - [AP3B1_MOUSE]                                                        | 3.08  | 1 | 1  | 3  | 4   | 0.66 | 0.98 | 1.48 | 1.06 | 1.61 | 0.83 | 1.25 | 0.96 | 1.45 | 1.02 | 1.54 | 0.94 | 1.43 | 122.66 | 5.66 |
| Q91VB8   | Alpha globin 1 OS=Mus musculus GN=Hba-a1 PE=2 SV=1 - [Q91VB8_MOUSE]                                                                   | 62.68 | 4 | 7  | 7  | 176 | 0.84 | 1.04 | 1.17 | 0.60 | 0.72 | 0.81 | 0.94 | 0.96 | 1.15 | 1.12 | 1.39 | 0.80 | 0.93 | 15.10  | 8.22 |
| P57080   | Ubiquitin carboxyl-terminal hydrolase 25 OS=Mus musculus GN=Usp25 PE=1 SV=2 - [UBP25_MOUSE]                                           | 1.33  | 1 | 1  | 2  | 4   | 0.94 | 1.25 | 1.32 | 1.00 | 1.06 | 0.80 | 0.85 | 0.96 | 1.02 | 1.02 | 1.09 | 1.18 | 1.26 | 121.34 | 5.31 |
| Q6P1F6   | Serine/threonine-protein phosphatase 2A 55 kDa regulatory subunit B alpha isoform OS=Mus musculus GN=Ppp2r2a PE=1 SV=1 - [2ABA_MOUSE] | 42.51 | 9 | 15 | 15 | 68  | 1.02 | 0.93 | 0.95 | 1.04 | 1.04 | 1.03 | 0.98 | 0.96 | 1.00 | 0.96 | 1.00 | 1.01 | 1.01 | 51.66  | 6.20 |
| P43006-2 | Isoform Glt-1A of Excitatory amino acid transporter 2 OS=Mus musculus GN=Slc1a2 - [EAA2_MOUSE]                                        | 40.07 | 5 | 3  | 23 | 422 | 0.94 | 0.94 | 0.99 | 1.08 | 1.07 | 0.95 | 1.00 | 0.96 | 0.97 | 1.01 | 0.97 | 0.83 | 0.90 | 61.73  | 6.84 |
| A2ARP1-  | Isoform 3 of Inositol hexakisphosphate and diphosphoinositol-pentakisphosphate kinase 1 OS=Mus musculus GN=Ppip5k1 - [VIP1_MOUSE]     | 4.45  | 9 | 5  | 5  | 8   | 1.00 | 1.15 | 1.15 | 1.06 | 1.06 | 1.01 | 0.92 | 0.96 | 0.96 | 1.04 | 1.06 | 1.12 | 1.11 | 157.45 | 5.33 |

|          |                                                                                                                    |       |   |    |    |     |      |      |      |      |      |      |      |      |      |      |      |      |      |        |      |
|----------|--------------------------------------------------------------------------------------------------------------------|-------|---|----|----|-----|------|------|------|------|------|------|------|------|------|------|------|------|------|--------|------|
| G5E866   | Splicing factor 3B subunit 1 OS=Mus musculus GN=SF3b1 PE=4 SV=1 - [G5E866_MOUSE]                                   | 18.33 | 2 | 17 | 17 | 39  | 0.95 | 0.94 | 0.98 | 1.02 | 1.09 | 0.94 | 0.96 | 0.96 | 1.04 | 0.98 | 1.02 | 0.97 | 1.07 | 145.74 | 7.09 |
| Q8C167-2 | Isoform 2 of Prolyl endopeptidase-like OS=Mus musculus GN=Prepl - [PPCEL_MOUSE]                                    | 23.35 | 4 | 10 | 10 | 23  | 1.09 | 0.92 | 0.85 | 1.02 | 1.02 | 1.04 | 1.01 | 0.96 | 0.95 | 1.08 | 1.10 | 0.95 | 0.92 | 73.17  | 5.59 |
| P62962   | Profilin-1 OS=Mus musculus GN=Pfn1 PE=1 SV=2 - [PROF1_MOUSE]                                                       | 71.43 | 3 | 8  | 8  | 89  | 1.01 | 0.99 | 0.98 | 1.05 | 1.04 | 1.00 | 0.98 | 0.96 | 0.92 | 0.99 | 0.98 | 1.07 | 1.08 | 14.95  | 8.28 |
| Q922D4-2 | Isoform 2 of Serine/threonine-protein phosphatase 6 regulatory subunit 3 OS=Mus musculus GN=Ppp6r3 - [PP6R3_MOUSE] | 15.96 | 5 | 10 | 10 | 31  | 0.98 | 1.01 | 1.12 | 0.97 | 0.97 | 0.98 | 1.00 | 0.96 | 0.97 | 0.97 | 1.00 | 0.96 | 0.98 | 92.56  | 4.59 |
| Q9D5V6   | Synapse-associated protein 1 OS=Mus musculus GN=Syap1 PE=1 SV=1 - [SYAP1_MOUSE]                                    | 50.41 | 1 | 14 | 14 | 58  | 0.98 | 0.79 | 0.74 | 0.89 | 0.88 | 1.01 | 1.02 | 0.96 | 0.96 | 0.90 | 0.89 | 0.91 | 0.86 | 41.32  | 4.54 |
| Q8JZW5   | SH2 domain-containing protein 5 OS=Mus musculus GN=Sh2d5 PE=1 SV=2 - [SH2D5_MOUSE]                                 | 13.91 | 2 | 3  | 3  | 4   | 0.91 | 1.21 | 1.33 | 1.15 | 1.22 | 0.88 | 0.93 | 0.96 | 1.06 | 1.14 | 1.25 | 1.28 | 1.36 | 38.15  | 8.32 |
| Q91V14   | Solute carrier family 12 member 5 OS=Mus musculus GN=Slc12a5 PE=1 SV=2 - [S12A5_MOUSE]                             | 27.33 | 3 | 21 | 26 | 136 | 1.02 | 1.03 | 1.00 | 1.10 | 1.11 | 0.86 | 0.89 | 0.96 | 0.94 | 0.93 | 0.93 | 0.90 | 0.89 | 126.19 | 6.74 |
| Q3V116   | Polyhomeotic-like protein 1 OS=Mus musculus GN=Pbc1 PE=2 SV=1 - [Q3V116_MOUSE]                                     | 3.65  | 6 | 1  | 1  | 3   | 0.59 | 0.75 | 1.27 | 1.10 | 1.86 | 0.88 | 1.48 | 0.96 | 1.63 | 0.79 | 1.34 | 0.84 | 1.42 | 100.62 | 9.25 |
| Q91W61   | F-box/LRR-repeat protein 15 OS=Mus musculus GN=Fbxl15 PE=1 SV=2 - [FXL15_MOUSE]                                    | 4.00  | 1 | 1  | 1  | 2   | 0.95 | 1.28 | 1.34 | 1.12 | 1.17 | 1.02 | 1.06 | 0.96 | 1.01 | 1.24 | 1.30 | 1.16 | 1.21 | 33.10  | 7.43 |
| Q8C570   | mRNA export factor OS=Mus musculus GN=Rae1 PE=1 SV=1 - [RAE1L_MOUSE]                                               | 27.17 | 2 | 7  | 7  | 16  | 0.88 | 0.87 | 0.95 | 0.90 | 1.00 | 0.97 | 1.07 | 0.96 | 1.06 | 0.92 | 0.97 | 0.89 | 1.02 | 40.94  | 7.83 |
| Q8K0F1   | TBC1 domain family member 23 OS=Mus musculus GN=Tbc1d23 PE=2 SV=1 - [TBC23_MOUSE]                                  | 1.02  | 1 | 1  | 1  | 1   | 1.06 | 1.01 | 0.95 | 1.08 | 1.02 | 1.00 | 0.93 | 0.96 | 0.90 | 1.09 | 1.02 | 1.17 | 1.10 | 76.38  | 5.36 |
| G3X9Y1   | Synaptotagmin III, isoform CRA_a OS=Mus musculus GN=Sy3 PE=4 SV=1 - [G3X9Y1_MOUSE]                                 | 8.69  | 4 | 5  | 5  | 9   | 1.03 | 0.94 | 0.92 | 1.15 | 1.11 | 0.91 | 0.92 | 0.96 | 0.98 | 0.97 | 0.74 | 0.95 | 0.93 | 63.21  | 6.62 |

|          |                                                                                                                              |       |   |    |    |     |      |      |      |      |      |      |      |      |      |      |      |      |      |        |      |
|----------|------------------------------------------------------------------------------------------------------------------------------|-------|---|----|----|-----|------|------|------|------|------|------|------|------|------|------|------|------|------|--------|------|
| P59764   | Dedicator of cytokinesis protein 4<br>OS=Mus musculus<br>GN=Dock4 PE=1<br>SV=1 -<br>[DOCK4_MOUSE]                            | 6.32  | 1 | 7  | 7  | 17  | 1.06 | 1.19 | 1.21 | 1.10 | 1.04 | 1.04 | 1.02 | 0.96 | 0.79 | 1.08 | 1.04 | 1.35 | 1.24 | 226.41 | 7.65 |
| Q8R519   | PRA1 family protein 3<br>OS=Mus musculus<br>GN=Arf6ip5 PE=1<br>SV=2 -<br>[PRAF3_MOUSE]                                       | 19.68 | 1 | 3  | 3  | 10  | 0.98 | 1.10 | 1.25 | 1.11 | 1.14 | 0.93 | 1.01 | 0.96 | 0.99 | 1.05 | 1.12 | 1.07 | 1.12 | 21.54  | 9.61 |
| Q8K097-2 | Isoform 2 of Protein lifeguard 2<br>OS=Mus musculus<br>GN=Faim2 -<br>[LFG2_MOUSE]                                            | 12.13 | 2 | 2  | 2  | 12  | 1.02 | 1.02 | 1.09 | 0.97 | 1.00 | 1.09 | 1.09 | 0.96 | 0.96 | 0.98 | 0.99 | 0.95 | 0.97 | 34.24  | 7.46 |
| Q60790   | Ras GTPase-activating protein 3<br>OS=Mus musculus<br>GN=Rasa3 PE=1<br>SV=2 -<br>[RASA3_MOUSE]                               | 2.88  | 1 | 2  | 2  | 4   | 0.98 | 1.07 | 1.09 | 1.18 | 1.20 | 1.06 | 1.07 | 0.96 | 0.98 | 1.04 | 1.06 | 1.45 | 1.48 | 95.93  | 7.34 |
| Q8BIW1   | Protein prune homolog<br>OS=Mus musculus<br>GN=Prune PE=2<br>SV=1 -<br>[PRUNE_MOUSE]                                         | 44.49 | 1 | 14 | 14 | 37  | 1.03 | 0.94 | 0.93 | 1.02 | 1.02 | 0.92 | 0.89 | 0.96 | 0.94 | 0.95 | 0.93 | 0.92 | 0.90 | 50.21  | 5.11 |
| Q60967   | Bifunctional 3'-phosphoadenosine 5'-phosphosulfate synthase 1<br>OS=Mus musculus<br>GN=Paps1 PE=2<br>SV=1 -<br>[PAPS1_MOUSE] | 4.49  | 1 | 2  | 2  | 4   | 1.03 | 0.75 | 0.72 | 1.11 | 1.08 | 1.04 | 1.01 | 0.96 | 0.93 | 0.96 | 0.94 | 0.98 | 0.95 | 70.75  | 6.77 |
| G3UZY2   | Thioredoxin (Fragment)<br>OS=Mus musculus<br>GN=Txn2 PE=3<br>SV=1 -<br>[G3UZY2_MOUSE]                                        | 52.31 | 4 | 6  | 6  | 158 | 1.06 | 0.86 | 0.89 | 0.92 | 0.88 | 1.03 | 1.00 | 0.96 | 0.95 | 0.90 | 0.85 | 0.85 | 0.83 | 14.20  | 5.81 |
| P61222   | ATP-binding cassette sub-family E member 1<br>OS=Mus musculus<br>GN=Abce1 PE=2<br>SV=1 -<br>[ABCE1_MOUSE]                    | 17.03 | 1 | 8  | 8  | 15  | 0.97 | 0.78 | 0.83 | 0.97 | 1.04 | 0.96 | 0.90 | 0.96 | 0.90 | 0.86 | 0.89 | 0.83 | 0.85 | 67.27  | 8.34 |
| Q80W22   | Threonine synthase-like 2<br>OS=Mus musculus<br>GN=Thns2 PE=2<br>SV=1 -<br>[THNS2_MOUSE]                                     | 10.35 | 2 | 4  | 4  | 6   | 1.17 | 1.06 | 0.95 | 0.99 | 0.90 | 0.90 | 0.77 | 0.96 | 0.82 | 0.93 | 0.81 | 1.04 | 0.90 | 54.15  | 6.39 |
| Q810U4-3 | Isoform 3 of Neuronal cell adhesion molecule<br>OS=Mus musculus<br>GN=Nrcam -<br>[NRCAM_MOUSE]                               | 41.43 | 3 | 3  | 38 | 374 | 0.95 | 0.91 | 0.95 | 1.06 | 1.04 | 0.83 | 0.92 | 0.96 | 0.94 | 0.90 | 1.05 | 0.85 | 0.98 | 138.95 | 5.92 |
| O35344   | Importin subunit alpha-4<br>OS=Mus musculus<br>GN=Kpna3 PE=1<br>SV=1 -<br>[IMA4_MOUSE]                                       | 11.13 | 1 | 3  | 5  | 8   | 0.94 | 0.72 | 0.73 | 0.98 | 1.11 | 1.00 | 1.05 | 0.96 | 1.02 | 1.03 | 0.98 | 0.99 | 0.93 | 57.74  | 4.94 |

|        |                                                                                                                  |       |   |    |    |    |      |      |      |      |      |      |      |      |      |      |      |      |      |        |      |
|--------|------------------------------------------------------------------------------------------------------------------|-------|---|----|----|----|------|------|------|------|------|------|------|------|------|------|------|------|------|--------|------|
| P54116 | Erythrocyte band 7 integral membrane protein OS=Mus musculus GN=Stom PE=1 SV=3 - [STOM_MOUSE]                    | 2.82  | 1 | 1  | 1  | 2  | 1.00 | 1.38 | 1.38 | 1.09 | 1.09 | 0.92 | 0.91 | 0.96 | 0.96 | 1.21 | 1.21 | 1.23 | 1.24 | 31.36  | 6.93 |
| Q9D6F4 | Gamma-aminobutyric acid receptor subunit alpha-4 OS=Mus musculus GN=Gabra4 PE=2 SV=1 - [GBRA4_MOUSE]             | 6.16  | 1 | 3  | 3  | 5  | 0.92 | 1.04 | 1.23 | 1.00 | 1.20 | 1.04 | 1.09 | 0.96 | 1.01 | 0.99 | 1.08 | 1.11 | 1.21 | 60.84  | 9.32 |
| Q8CGC4 | Protein LSM14 homolog B OS=Mus musculus GN=Lsm14b PE=2 SV=3 - [LS14B_MOUSE]                                      | 17.66 | 1 | 2  | 5  | 13 | 0.97 | 0.76 | 0.79 | 0.79 | 0.82 | 0.82 | 0.84 | 0.96 | 0.99 | 0.68 | 0.71 | 0.66 | 0.68 | 42.28  | 9.63 |
| Q8K1A6 | Coiled-coil and C2 domain-containing protein 1A OS=Mus musculus GN=C2d1a PE=1 SV=2 - [C2D1A_MOUSE]               | 13.79 | 2 | 11 | 11 | 23 | 0.97 | 1.03 | 1.03 | 0.93 | 0.92 | 0.94 | 0.94 | 0.96 | 0.99 | 0.96 | 0.96 | 1.05 | 0.96 | 103.63 | 7.84 |
| D3Z0A2 | Protein arginine N-methyltransferase 1 OS=Mus musculus GN=Prmt1 PE=2 SV=1 - [D3Z0A2_MOUSE]                       | 14.78 | 6 | 2  | 4  | 11 | 1.08 | 0.92 | 0.85 | 0.96 | 0.86 | 0.91 | 0.80 | 0.96 | 0.94 | 0.83 | 0.77 | 1.05 | 1.03 | 36.54  | 6.19 |
| Q9WNT0 | Geranylgeranyl pyrophosphate synthase OS=Mus musculus GN=Ggpps1 PE=2 SV=1 - [GGPPS_MOUSE]                        | 3.67  | 1 | 1  | 1  | 2  | 1.10 | 0.76 | 0.69 | 1.16 | 1.05 | 1.05 | 0.95 | 0.96 | 0.87 | 0.92 | 0.84 | 0.93 | 0.85 | 34.68  | 6.46 |
| A2ALS5 | Protein Rap1gap OS=Mus musculus GN=Rap1gap PE=2 SV=1 - [A2ALS5_MOUSE]                                            | 29.83 | 5 | 6  | 13 | 36 | 1.07 | 1.15 | 1.02 | 1.07 | 0.98 | 1.03 | 0.91 | 0.96 | 0.92 | 1.04 | 0.92 | 1.08 | 1.01 | 76.74  | 6.07 |
| P07356 | Annexin A2 OS=Mus musculus GN=Anxa2 PE=1 SV=2 - [ANXA2_MOUSE]                                                    | 21.83 | 4 | 8  | 8  | 14 | 1.10 | 1.02 | 0.92 | 1.02 | 0.99 | 0.91 | 0.79 | 0.96 | 0.92 | 1.04 | 1.03 | 0.94 | 0.82 | 38.65  | 7.69 |
| P24270 | Catalase OS=Mus musculus GN=Cat PE=1 SV=4 - [CATA_MOUSE]                                                         | 32.64 | 2 | 12 | 12 | 26 | 0.94 | 1.09 | 1.16 | 1.02 | 1.07 | 0.91 | 0.98 | 0.96 | 1.03 | 1.05 | 1.06 | 1.04 | 1.10 | 59.76  | 7.88 |
| Q9CZ30 | Obg-like ATPase 1 OS=Mus musculus GN=Ola1 PE=1 SV=1 - [OLA1_MOUSE]                                               | 37.37 | 4 | 12 | 12 | 35 | 0.93 | 0.80 | 0.84 | 1.04 | 1.02 | 1.02 | 1.04 | 0.96 | 0.97 | 0.98 | 0.98 | 0.90 | 0.93 | 44.70  | 7.81 |
| F6S185 | Phosphoinositide-3-kinase-interacting protein 1 (Fragment) OS=Mus musculus GN=Pik3ip1 PE=4 SV=1 - [F6S185_MOUSE] | 9.66  | 3 | 1  | 1  | 2  | 0.99 | 1.32 | 1.33 | 1.09 | 1.10 | 0.93 | 0.93 | 0.96 | 0.97 | 0.84 | 0.85 | 0.97 | 0.98 | 18.78  | 5.60 |
| Q9Z2N8 | Actin-like protein 6A OS=Mus musculus GN=Actl6a PE=1 SV=2 - [ACL6A_MOUSE]                                        | 8.39  | 1 | 1  | 2  | 2  | 1.04 | 0.64 | 0.61 | 1.00 | 0.96 | 0.98 | 0.93 | 0.96 | 0.92 | 0.93 | 0.89 | 0.78 | 0.75 | 47.42  | 5.60 |

|        |                                                                                                                     |       |   |    |    |     |      |      |      |      |      |      |      |      |      |      |      |      |      |       |      |
|--------|---------------------------------------------------------------------------------------------------------------------|-------|---|----|----|-----|------|------|------|------|------|------|------|------|------|------|------|------|------|-------|------|
| Q91WM1 | Isoform 2 of Spermatid perinuclear RNA-binding protein OS=Mus musculus GN=Srbp - [STRBP_MOUSE]                      | 3.09  | 2 | 1  | 2  | 5   | 0.84 | 0.76 | 0.90 | 0.98 | 1.17 | 0.91 | 1.08 | 0.96 | 1.14 | 0.83 | 0.99 | 0.88 | 1.04 | 70.77 | 8.51 |
| O35465 | Peptidyl-prolyl cis-trans isomerase FKBP8 OS=Mus musculus GN=Fkbp8 PE=1 SV=2 - [FKBP8_MOUSE]                        | 11.69 | 3 | 3  | 3  | 9   | 0.98 | 0.95 | 0.96 | 1.05 | 1.13 | 1.02 | 1.06 | 0.96 | 0.99 | 1.02 | 1.12 | 1.06 | 1.08 | 43.50 | 5.16 |
| Q9D706 | RNA polymerase II-associated protein 3 OS=Mus musculus GN=Rpap3 PE=1 SV=1 - [RPAP3_MOUSE]                           | 18.33 | 1 | 9  | 9  | 23  | 1.03 | 0.97 | 0.96 | 0.95 | 0.95 | 1.00 | 0.96 | 0.96 | 0.94 | 0.93 | 0.91 | 0.92 | 0.91 | 74.05 | 7.99 |
| Q9D0K2 | Succinyl-CoA:3-ketoacid coenzyme A transferase 1, mitochondrial OS=Mus musculus GN=Oxct1 PE=1 SV=1 - [SCOT1_MOUSE]  | 55.58 | 2 | 20 | 20 | 167 | 1.02 | 1.00 | 0.98 | 1.08 | 1.06 | 1.00 | 0.99 | 0.96 | 0.96 | 0.99 | 0.98 | 1.06 | 1.06 | 55.95 | 8.53 |
| Q8R570 | Synaptosomal-associated protein 47 OS=Mus musculus GN=Snap47 PE=1 SV=1 - [SNP47_MOUSE]                              | 49.15 | 6 | 15 | 15 | 38  | 1.01 | 1.07 | 1.03 | 1.01 | 1.01 | 1.01 | 1.00 | 0.96 | 0.98 | 1.00 | 1.01 | 0.97 | 0.97 | 46.50 | 5.76 |
| P07759 | Serine protease inhibitor A3K OS=Mus musculus GN=Serpina3k PE=1 SV=2 - [SPA3K_MOUSE]                                | 16.27 | 9 | 5  | 5  | 8   | 0.82 | 0.78 | 1.04 | 0.56 | 0.64 | 0.78 | 0.94 | 0.96 | 1.11 | 0.83 | 0.91 | 0.45 | 0.61 | 46.85 | 5.16 |
| G3UZ21 | Ral guanine nucleotide dissociation stimulator-like 2 (Fragment) OS=Mus musculus GN=Rgl2 PE=4 SV=1 - [G3UZ21_MOUSE] | 5.71  | 2 | 1  | 1  | 2   | 1.13 | 1.12 | 0.99 | 1.06 | 0.93 | 1.14 | 1.00 | 0.96 | 0.85 | 1.24 | 1.10 | 1.10 | 0.97 | 33.20 | 7.20 |
| Q9CQJ8 | NADH dehydrogenase [ubiquinone] 1 beta subcomplex subunit 9 OS=Mus musculus GN=Ndub9 PE=1 SV=3 - [NDUB9_MOUSE]      | 49.16 | 1 | 6  | 6  | 49  | 0.92 | 1.11 | 1.09 | 1.09 | 1.08 | 0.97 | 0.97 | 0.96 | 1.00 | 1.00 | 0.98 | 1.03 | 1.04 | 21.97 | 7.80 |
| Q6PD28 | Protein Ppp2r5b OS=Mus musculus GN=Ppp2r5b PE=2 SV=1 - [Q6PD28_MOUSE]                                               | 4.63  | 1 | 2  | 2  | 4   | 0.87 | 1.12 | 1.28 | 1.07 | 1.24 | 1.07 | 1.23 | 0.96 | 1.11 | 0.96 | 1.11 | 1.10 | 1.27 | 57.31 | 6.84 |
| Q99LB2 | Dehydrogenase/reductase SDR family member 4 OS=Mus musculus GN=Dhrs4 PE=2 SV=3 - [DHRS4_MOUSE]                      | 10.04 | 1 | 3  | 3  | 4   | 1.12 | 0.91 | 0.81 | 1.03 | 0.95 | 0.99 | 0.88 | 0.96 | 0.86 | 0.98 | 0.87 | 1.21 | 1.08 | 29.87 | 9.38 |

|        |                                                                                                           |       |   |   |   |    |      |      |      |      |      |      |      |      |      |      |      |      |      |       |      |
|--------|-----------------------------------------------------------------------------------------------------------|-------|---|---|---|----|------|------|------|------|------|------|------|------|------|------|------|------|------|-------|------|
| P67984 | 60S ribosomal protein L22 OS=Mus musculus GN=Rpl22 PE=2 SV=2 - [R122_MOUSE]                               | 50.78 | 1 | 4 | 4 | 44 | 1.04 | 1.08 | 1.02 | 1.05 | 1.05 | 0.84 | 0.83 | 0.96 | 0.97 | 0.93 | 0.90 | 0.87 | 0.83 | 14.75 | 9.19 |
| A2AHX7 | Bcl-2-like protein 1 (Fragment) OS=Mus musculus GN=Bcl2l1 PE=2 SV=1 - [A2AHX7_MOUSE]                      | 44.87 | 8 | 3 | 3 | 7  | 1.27 | 1.07 | 0.81 | 1.08 | 0.86 | 1.12 | 0.89 | 0.96 | 0.70 | 1.07 | 0.75 | 0.98 | 0.82 | 8.60  | 4.61 |
| Q9JIA7 | Sphingosine kinase 2 OS=Mus musculus GN=Sphk2 PE=1 SV=2 - [SPHK2_MOUSE]                                   | 4.54  | 1 | 2 | 2 | 4  | 1.00 | 1.20 | 1.20 | 1.10 | 1.10 | 0.93 | 0.93 | 0.96 | 0.96 | 0.96 | 0.96 | 0.98 | 0.98 | 65.58 | 6.57 |
| Q9EQQ2 | Protein YIPF5 OS=Mus musculus GN=Yipf5 PE=2 SV=1 - [YIPF5_MOUSE]                                          | 3.50  | 1 | 1 | 1 | 2  | 0.90 | 1.25 | 1.38 | 1.06 | 1.18 | 0.77 | 0.85 | 0.96 | 1.07 | 0.92 | 1.02 | 0.97 | 1.08 | 27.85 | 4.36 |
| E9Q9E0 | Calcium uptake protein 1, mitochondrial (Fragment) OS=Mus musculus GN=Micu1 PE=2 SV=1 - [E9Q9E0_MOUSE]    | 22.22 | 5 | 4 | 4 | 7  | 0.97 | 0.99 | 1.02 | 1.11 | 1.20 | 0.88 | 0.92 | 0.96 | 1.02 | 0.98 | 1.03 | 1.11 | 1.10 | 26.70 | 6.06 |
| Q64343 | ATP-binding cassette sub-family G member 1 OS=Mus musculus GN=Abcg1 PE=1 SV=1 - [ABCG1_MOUSE]             | 1.35  | 1 | 1 | 1 | 2  | 0.99 | 1.26 | 1.27 | 1.07 | 1.08 | 0.92 | 0.92 | 0.96 | 0.97 | 0.98 | 0.99 | 1.05 | 1.06 | 73.98 | 7.06 |
| D3YWY6 | Mitochondrial pyruvate carrier 1 OS=Mus musculus GN=Mpc1 PE=2 SV=1 - [D3YWY6_MOUSE]                       | 9.41  | 4 | 1 | 1 | 1  | 0.94 | 1.31 | 1.39 | 1.44 | 1.52 | 1.12 | 1.18 | 0.96 | 1.02 | 1.05 | 1.11 | 0.90 | 0.96 | 9.73  | 9.39 |
| Q8VCH8 | UBX domain-containing protein 4 OS=Mus musculus GN=Ubxn4 PE=1 SV=1 - [UBXN4_MOUSE]                        | 7.31  | 1 | 2 | 2 | 6  | 1.08 | 0.94 | 0.87 | 1.02 | 0.96 | 1.04 | 0.94 | 0.96 | 0.97 | 1.09 | 0.87 | 1.06 | 0.98 | 56.44 | 6.61 |
| P97384 | Annexin A11 OS=Mus musculus GN=Anxa11 PE=1 SV=2 - [ANX11_MOUSE]                                           | 16.10 | 2 | 6 | 7 | 12 | 1.02 | 1.10 | 1.06 | 1.07 | 1.05 | 0.96 | 0.94 | 0.96 | 0.95 | 0.96 | 0.96 | 0.99 | 0.96 | 54.04 | 7.66 |
| A2AKH7 | Leucine-rich repeat-containing protein 57 (Fragment) OS=Mus musculus GN=Lrre57 PE=2 SV=1 - [A2AKH7_MOUSE] | 25.11 | 3 | 5 | 5 | 10 | 0.97 | 0.95 | 0.94 | 1.14 | 1.04 | 1.00 | 1.07 | 0.96 | 1.05 | 1.04 | 0.91 | 0.97 | 0.87 | 24.27 | 8.18 |
| Q9Z2C4 | Myotubularin-related protein 1 OS=Mus musculus GN=Mtmr1 PE=1 SV=1 - [MTMR1_MOUSE]                         | 11.36 | 5 | 3 | 7 | 15 | 1.02 | 1.10 | 1.10 | 1.12 | 1.02 | 0.89 | 0.95 | 0.96 | 1.00 | 1.05 | 1.05 | 1.06 | 1.15 | 75.27 | 6.80 |
| O89051 | Integral membrane protein 2B OS=Mus musculus GN=Im2b PE=2 SV=1 - [ITM2B_MOUSE]                            | 7.14  | 1 | 2 | 2 | 2  | 1.17 | 0.88 | 0.75 | 1.14 | 0.97 | 0.92 | 0.78 | 0.96 | 0.82 | 0.94 | 0.80 | 1.02 | 0.87 | 30.24 | 5.30 |



|          |                                                                                                                            |       |   |    |    |    |      |      |      |      |      |      |      |      |      |      |      |      |      |        |      |
|----------|----------------------------------------------------------------------------------------------------------------------------|-------|---|----|----|----|------|------|------|------|------|------|------|------|------|------|------|------|------|--------|------|
| Q99JN2   | Kelch-like protein 22<br>OS=Mus musculus<br>GN=Kihl22 PE=1<br>SV=1 -<br>[KLH22_MOUSE]                                      | 3.47  | 3 | 2  | 2  | 3  | 1.32 | 1.37 | 1.04 | 1.19 | 0.90 | 1.00 | 0.75 | 0.96 | 0.73 | 0.99 | 0.75 | 1.06 | 0.80 | 71.64  | 5.71 |
| Q91VZ6   | Stromal membrane-associated protein 1<br>OS=Mus musculus<br>GN=Smap1 PE=1<br>SV=1 -<br>[SMAP1_MOUSE]                       | 20.91 | 2 | 7  | 8  | 46 | 1.03 | 0.97 | 0.93 | 1.00 | 0.96 | 0.93 | 0.94 | 0.96 | 0.95 | 0.92 | 0.91 | 0.91 | 0.87 | 47.63  | 8.51 |
| H3BJ89   | Syntaxin-5 OS=Mus musculus<br>GN=Stx5a PE=2 SV=1 -<br>[H3BJ89_MOUSE]                                                       | 45.61 | 6 | 2  | 2  | 6  | 1.00 | 1.29 | 1.32 | 1.14 | 1.14 | 0.91 | 0.94 | 0.96 | 1.00 | 1.09 | 1.08 | 1.21 | 1.17 | 6.68   | 4.42 |
| Q3UHD2   | Glucose-fructose oxidoreductase domain-containing protein 1<br>OS=Mus musculus<br>GN=Gfod1 PE=2<br>SV=1 -<br>[GFOD1_MOUSE] | 3.85  | 1 | 1  | 1  | 2  | 0.93 | 1.08 | 1.16 | 1.19 | 1.28 | 0.87 | 0.94 | 0.96 | 1.04 | 0.85 | 0.92 | 0.95 | 1.02 | 43.26  | 5.92 |
| Q8R4H2   | Rho guanine nucleotide exchange factor 12<br>OS=Mus musculus<br>GN=Arhgef12 PE=1<br>SV=2 -<br>[ARHGC_MOUSE]                | 12.83 | 2 | 15 | 15 | 27 | 0.96 | 1.09 | 1.19 | 1.01 | 1.07 | 0.97 | 1.03 | 0.96 | 1.06 | 1.04 | 1.08 | 1.06 | 1.13 | 172.24 | 5.74 |
| Q3TDT0   | Tripartite motif-containing protein 3<br>OS=Mus musculus<br>GN=Trim3 PE=2<br>SV=1 -<br>[Q3TDT0_MOUSE]                      | 22.73 | 5 | 11 | 14 | 30 | 1.01 | 0.97 | 0.98 | 0.98 | 1.01 | 1.01 | 1.03 | 0.96 | 0.97 | 0.97 | 0.99 | 0.95 | 0.99 | 78.22  | 8.16 |
| B0V2N1-4 | Isoform 6 of Receptor-type tyrosine-protein phosphatase 5<br>OS=Mus musculus<br>GN=Ptpns -<br>[PTPRS_MOUSE]                | 25.31 | 6 | 21 | 27 | 76 | 1.03 | 1.11 | 1.01 | 1.02 | 0.99 | 0.93 | 0.92 | 0.96 | 0.92 | 0.95 | 0.91 | 0.94 | 0.98 | 206.70 | 7.28 |
| H7BWZ3   | Actin-related protein 2/3 complex subunit 3<br>OS=Mus musculus<br>GN=Arpc3 PE=2<br>SV=1 -<br>[H7BWZ3_MOUSE]                | 30.59 | 4 | 6  | 6  | 25 | 1.00 | 1.03 | 1.13 | 1.13 | 1.14 | 0.95 | 0.91 | 0.96 | 0.91 | 0.96 | 0.94 | 1.00 | 1.08 | 19.62  | 8.60 |
| Q8K394   | Inactive phospholipase C-like protein 2<br>OS=Mus musculus<br>GN=Plcl2 PE=1 SV=2<br>[PLCL2_MOUSE]                          | 21.19 | 1 | 15 | 16 | 36 | 0.91 | 0.83 | 0.93 | 1.04 | 1.12 | 0.97 | 1.01 | 0.96 | 1.01 | 0.95 | 1.00 | 0.95 | 0.99 | 125.69 | 6.92 |
| G3X934   | MCG115964 OS=Mus musculus<br>GN=Wdr70 PE=4 SV=1 -<br>[G3X934_MOUSE]                                                        | 1.52  | 2 | 1  | 1  | 1  | 0.83 | 0.96 | 1.15 | 0.78 | 0.94 | 1.00 | 1.19 | 0.96 | 1.15 | 0.79 | 0.95 | 0.76 | 0.91 | 73.01  | 6.05 |
| B0QZV3   | Protein Slc9a6<br>OS=Mus musculus<br>GN=Slc9a6 PE=2<br>SV=1 -<br>[B0QZV3_MOUSE]                                            | 9.70  | 2 | 6  | 6  | 22 | 1.06 | 1.16 | 1.15 | 1.10 | 1.05 | 0.93 | 0.87 | 0.96 | 0.91 | 0.96 | 1.00 | 0.90 | 0.87 | 74.18  | 6.39 |

|        |                                                                                                                         |       |   |    |    |    |      |      |      |      |      |      |      |      |      |      |      |      |      |        |      |
|--------|-------------------------------------------------------------------------------------------------------------------------|-------|---|----|----|----|------|------|------|------|------|------|------|------|------|------|------|------|------|--------|------|
| D3Z6B9 | Mitochondrial 10-formyltetrahydrofolate dehydrogenase<br>OS=Mus musculus<br>GN=Aldh1l2 PE=2<br>SV=1 -<br>[D3Z6B9_MOUSE] | 7.16  | 2 | 2  | 5  | 7  | 1.07 | 1.16 | 1.08 | 1.03 | 0.96 | 0.97 | 0.90 | 0.96 | 0.89 | 1.15 | 1.07 | 1.14 | 1.06 | 88.84  | 5.58 |
| Q9QYI3 | Dnaj homolog subfamily C member 7<br>OS=Mus musculus<br>GN=Dnajc7 PE=1<br>SV=2 -<br>[DNJC7_MOUSE]                       | 21.86 | 3 | 10 | 10 | 24 | 0.94 | 0.94 | 0.98 | 0.88 | 0.99 | 0.96 | 0.97 | 0.96 | 1.03 | 0.92 | 0.97 | 0.99 | 1.02 | 56.44  | 6.49 |
| D3YTM1 | Type 1 inositol 3,4-bisphosphate 4-phosphatase OS=Mus musculus GN=Inpp4a PE=2 SV=1 -<br>[D3YTM1_MOUSE]                  | 20.45 | 9 | 13 | 13 | 25 | 0.97 | 1.08 | 1.10 | 1.17 | 1.12 | 0.96 | 0.97 | 0.96 | 0.97 | 0.95 | 0.96 | 0.97 | 1.02 | 100.52 | 6.64 |
| Q9CX9  | ETS translocation variant 5 OS=Mus musculus GN=Etv5 PE=2 SV=1 -<br>[ETV5_MOUSE]                                         | 2.35  | 2 | 1  | 1  | 2  | 0.87 | 1.37 | 1.58 | 1.04 | 1.20 | 0.83 | 0.95 | 0.96 | 1.11 | 0.80 | 0.93 | 0.94 | 1.08 | 57.67  | 5.63 |
| P46935 | E3 ubiquitin-protein ligase NEDD4 OS=Mus musculus GN=Nedd4 PE=1 SV=3 -<br>[NEDD4_MOUSE]                                 | 24.58 | 1 | 14 | 16 | 41 | 1.03 | 1.09 | 1.09 | 1.05 | 1.03 | 0.94 | 0.90 | 0.96 | 0.91 | 1.00 | 1.02 | 1.00 | 0.95 | 102.64 | 5.26 |
| Q80XU2 | Neuronal proto-oncogene tyrosine-protein kinase Src OS=Mus musculus GN=Src PE=2 SV=1 -<br>[Q80XU2_MOUSE]                | 22.24 | 2 | 6  | 10 | 21 | 1.06 | 1.19 | 0.99 | 1.12 | 1.02 | 1.02 | 0.95 | 0.96 | 0.90 | 1.00 | 0.91 | 1.01 | 0.97 | 59.85  | 7.42 |
| Q9R0Q6 | Actin-related protein 2/3 complex subunit 1A OS=Mus musculus GN=Arp1a PE=1 SV=1 -<br>[ARC1A_MOUSE]                      | 49.19 | 4 | 14 | 14 | 37 | 0.99 | 0.91 | 0.91 | 0.99 | 1.04 | 0.95 | 0.91 | 0.97 | 0.91 | 0.93 | 0.95 | 0.96 | 0.98 | 41.60  | 8.18 |
| E9Q3M3 | Dynalectin subunit 1 OS=Mus musculus GN=Dctn1 PE=2 SV=1 -<br>[E9Q3M3_MOUSE]                                             | 37.10 | 8 | 37 | 37 | 92 | 0.96 | 0.98 | 1.03 | 1.09 | 1.15 | 0.97 | 0.99 | 0.97 | 1.01 | 1.04 | 1.08 | 1.00 | 1.03 | 139.68 | 5.71 |
| Q61235 | Beta-2-syntrophin OS=Mus musculus GN=Sntb2 PE=1 SV=2 -<br>[SNTB2_MOUSE]                                                 | 2.69  | 1 | 1  | 1  | 2  | 0.87 | 1.14 | 1.31 | 1.00 | 1.15 | 0.78 | 0.89 | 0.97 | 1.10 | 1.02 | 1.18 | 1.04 | 1.20 | 56.35  | 8.69 |
| Q8BGH4 | Receptor expression-enhancing protein 1 OS=Mus musculus GN=Reep1 PE=1 SV=1 -<br>[REEP1_MOUSE]                           | 24.88 | 1 | 4  | 4  | 9  | 0.93 | 0.86 | 0.90 | 1.04 | 1.13 | 0.99 | 1.02 | 0.97 | 1.10 | 0.96 | 1.04 | 0.94 | 1.09 | 22.27  | 9.50 |
| O70443 | Guanine nucleotide-binding protein G(z) subunit alpha OS=Mus musculus GN=Gnaz PE=2 SV=4 -<br>[GNAZ_MOUSE]               | 37.46 | 1 | 11 | 11 | 40 | 1.02 | 1.19 | 1.14 | 1.15 | 1.13 | 0.96 | 0.89 | 0.97 | 0.92 | 1.01 | 0.96 | 1.03 | 1.04 | 40.82  | 7.61 |

|        |                                                                                                                                   |       |    |    |    |    |      |      |      |      |      |      |      |      |      |      |      |      |      |        |      |
|--------|-----------------------------------------------------------------------------------------------------------------------------------|-------|----|----|----|----|------|------|------|------|------|------|------|------|------|------|------|------|------|--------|------|
| Q8CHT1 | Isoform 2 of Ephexin-1<br>OS=Mus musculus<br>GN=Ngef -<br>[NGEF_MOUSE]                                                            | 25.16 | 4  | 15 | 15 | 35 | 0.98 | 1.09 | 1.14 | 1.14 | 1.18 | 0.96 | 1.02 | 0.97 | 1.01 | 0.97 | 1.03 | 1.11 | 1.13 | 71.37  | 5.24 |
| A2ADY9 | Protein DDI1 homolog<br>2 OS=Mus musculus<br>GN=Ddi2 PE=1 SV=1 -<br>[DDI2_MOUSE]                                                  | 23.81 | 1  | 7  | 7  | 12 | 0.90 | 0.83 | 0.84 | 0.98 | 0.98 | 0.96 | 1.01 | 0.97 | 1.06 | 0.93 | 1.01 | 0.88 | 0.99 | 44.56  | 5.05 |
| Q8K0D0 | Isoform 2 of Cyclin-<br>dependent kinase 17<br>OS=Mus musculus<br>GN=Cdk17 -<br>[CDK17_MOUSE]                                     | 17.67 | 50 | 3  | 8  | 16 | 0.82 | 0.83 | 1.01 | 0.98 | 1.11 | 0.91 | 0.98 | 0.97 | 1.02 | 0.96 | 1.02 | 0.79 | 0.97 | 48.94  | 8.06 |
| P60766 | Cell division control<br>protein 42 homolog<br>OS=Mus musculus<br>GN=Cdc42 PE=1<br>SV=2 -<br>[CDC42_MOUSE]                        | 48.17 | 8  | 2  | 9  | 60 | 1.07 | 1.12 | 1.03 | 1.06 | 1.08 | 0.97 | 0.97 | 0.97 | 0.89 | 0.96 | 0.90 | 1.03 | 0.98 | 21.25  | 6.55 |
| Q3UMQ8 | H/ACA<br>ribonucleoprotein<br>complex non-core<br>subunit NAF1<br>OS=Mus musculus<br>GN=Naf1 PE=1 SV=2 -<br>[NAF1_MOUSE]          | 9.61  | 2  | 2  | 2  | 3  | 1.06 | 0.92 | 0.87 | 0.86 | 0.81 | 0.70 | 0.65 | 0.97 | 0.91 | 1.04 | 0.98 | 1.15 | 1.09 | 53.21  | 5.16 |
| P16283 | Anion exchange<br>protein 3 OS=Mus<br>musculus GN=Slc4a3<br>PE=1 SV=2 -<br>[B3A3_MOUSE]                                           | 11.17 | 8  | 10 | 10 | 15 | 1.15 | 1.04 | 0.97 | 1.12 | 1.02 | 1.07 | 0.96 | 0.97 | 0.92 | 1.07 | 0.98 | 1.17 | 1.01 | 135.29 | 6.51 |
| Q3V0G7 | Isoform 2 of GTPase-<br>activating Rap/Ran-<br>GAP domain-like<br>protein 3 OS=Mus<br>musculus GN=Garnl3 -<br>[GARL3_MOUSE]       | 3.22  | 3  | 2  | 2  | 4  | 0.93 | 0.87 | 0.94 | 0.99 | 1.06 | 1.02 | 1.09 | 0.97 | 1.03 | 0.92 | 0.99 | 1.01 | 1.08 | 110.46 | 7.25 |
| Q8BNL5 | BTB/POZ domain-<br>containing protein<br>KCTD6 OS=Mus<br>musculus GN=Kctd6<br>PE=2 SV=1 -<br>[KCTD6_MOUSE]                        | 8.86  | 1  | 2  | 2  | 3  | 1.03 | 1.20 | 1.16 | 0.89 | 0.86 | 0.89 | 0.86 | 0.97 | 0.93 | 0.85 | 0.83 | 1.22 | 1.19 | 27.61  | 5.96 |
| Q8BK67 | Protein RCC2<br>OS=Mus musculus<br>GN=Rcc2 PE=2 SV=1 -<br>[RCC2_MOUSE]                                                            | 15.19 | 2  | 7  | 7  | 17 | 1.08 | 1.04 | 0.92 | 1.14 | 1.08 | 0.99 | 0.90 | 0.97 | 0.91 | 1.05 | 0.91 | 1.03 | 1.02 | 55.95  | 8.72 |
| D6RG85 | FAD-dependent<br>oxidoreductase domain-<br>containing protein 1<br>OS=Mus musculus<br>GN=Foxred1 PE=2<br>SV=1 -<br>[D6RG85_MOUSE] | 11.29 | 5  | 2  | 2  | 3  | 1.05 | 1.30 | 1.23 | 1.02 | 0.96 | 0.99 | 0.93 | 0.97 | 0.91 | 1.01 | 0.96 | 1.11 | 1.05 | 20.60  | 9.47 |
| P62889 | 60S ribosomal protein<br>L30 OS=Mus<br>musculus GN=Rpl30<br>PE=2 SV=2 -<br>[RL30_MOUSE]                                           | 30.43 | 1  | 3  | 3  | 9  | 1.06 | 0.93 | 0.88 | 0.95 | 1.05 | 0.89 | 0.86 | 0.97 | 0.91 | 0.94 | 0.89 | 1.04 | 0.98 | 12.78  | 9.63 |
| Q9Z140 | Copine-6 OS=Mus<br>musculus GN=Cpne6<br>PE=1 SV=1 -<br>[CPNE6_MOUSE]                                                              | 40.39 | 3  | 15 | 16 | 61 | 1.14 | 1.18 | 1.07 | 1.05 | 0.87 | 1.03 | 0.87 | 0.97 | 0.91 | 1.05 | 0.90 | 1.14 | 0.98 | 61.74  | 5.59 |

|        |                                                                                                                                |       |   |    |    |    |      |      |      |      |      |      |      |      |      |      |      |      |      |        |      |
|--------|--------------------------------------------------------------------------------------------------------------------------------|-------|---|----|----|----|------|------|------|------|------|------|------|------|------|------|------|------|------|--------|------|
| Q80VL1 | Tudor and KH domain-containing protein<br>OS=Mus musculus<br>GN=Tdrkh PE=1<br>SV=1 -<br>[TDRKH_MOUSE]                          | 14.82 | 1 | 5  | 5  | 10 | 0.99 | 1.04 | 0.88 | 1.01 | 0.99 | 1.03 | 0.88 | 0.97 | 0.94 | 1.01 | 0.87 | 0.95 | 0.91 | 62.10  | 4.94 |
| Q9CPZ8 | COX assembly mitochondrial protein homolog<br>OS=Mus musculus GN=Cmc1<br>PE=3 SV=1 -<br>[COXM1_MOUSE]                          | 25.47 | 1 | 2  | 2  | 4  | 1.13 | 0.59 | 0.66 | 0.88 | 0.82 | 0.99 | 0.98 | 0.97 | 0.92 | 0.99 | 0.95 | 0.90 | 0.92 | 12.54  | 8.24 |
| Q9CWR2 | Histone-lysine N-methyltransferase<br>SMYD3 OS=Mus musculus GN=Smyd3<br>PE=2 SV=1 -<br>[SMYD3_MOUSE]                           | 5.37  | 2 | 2  | 2  | 3  | 1.02 | 1.02 | 0.99 | 1.22 | 1.19 | 0.92 | 0.89 | 0.97 | 0.94 | 0.98 | 0.96 | 1.10 | 1.08 | 49.09  | 7.08 |
| Q3UG37 | Histone deacetylase 6 (Fragment)<br>OS=Mus musculus GN=Hdac6<br>PE=2 SV=1 -<br>[Q3UG37_MOUSE]                                  | 13.78 | 3 | 10 | 10 | 25 | 1.01 | 1.05 | 0.99 | 1.05 | 0.98 | 0.98 | 0.96 | 0.97 | 0.91 | 0.99 | 0.92 | 0.98 | 0.97 | 110.17 | 5.83 |
| Q8CG76 | Aflatoxin B1 aldehyde reductase member 2<br>OS=Mus musculus GN=Akr7a2<br>PE=1 SV=3 -<br>[ARK72_MOUSE]                          | 17.98 | 1 | 5  | 5  | 12 | 0.94 | 0.97 | 0.99 | 1.06 | 1.12 | 1.02 | 1.06 | 0.97 | 1.00 | 1.07 | 1.12 | 1.06 | 1.12 | 40.59  | 8.12 |
| Q9QYH6 | Melanoma-associated antigen D1<br>OS=Mus musculus GN=Maged1<br>PE=1 SV=1 -<br>[MAGD1_MOUSE]                                    | 9.03  | 2 | 4  | 5  | 11 | 1.10 | 0.76 | 0.68 | 0.99 | 0.94 | 1.14 | 1.07 | 0.97 | 0.93 | 1.03 | 1.02 | 0.95 | 0.87 | 85.62  | 7.50 |
| G3X9S2 | Ectonucleotide pyrophosphatase/phosphodiesterase 1, isoform CRA_d<br>OS=Mus musculus GN=Enpp1<br>PE=1 SV=1 -<br>[G3X9S2_MOUSE] | 1.33  | 3 | 1  | 1  | 2  | 1.09 | 1.30 | 1.19 | 1.19 | 1.10 | 1.02 | 0.93 | 0.97 | 0.89 | 1.14 | 1.05 | 0.86 | 0.79 | 102.96 | 6.57 |
| A2AED3 | Isoform 2 of Fibronectin type III domain-containing protein 7<br>OS=Mus musculus GN=Fndc7<br>PE=1 SV=1 -<br>[FNDC7_MOUSE]      | 2.47  | 4 | 1  | 1  | 1  | 1.35 | 0.87 | 0.64 | 0.99 | 0.74 | 1.23 | 0.90 | 0.97 | 0.71 | 0.99 | 0.73 | 1.18 | 0.87 | 34.53  | 4.96 |
| G3X9T8 | Ceruloplasmin<br>OS=Mus musculus GN=Cp<br>PE=4 SV=1 -<br>[G3X9T8_MOUSE]                                                        | 5.75  | 5 | 4  | 4  | 8  | 1.08 | 1.23 | 1.16 | 0.91 | 0.87 | 0.78 | 0.70 | 0.97 | 0.92 | 1.07 | 0.99 | 0.89 | 0.82 | 121.00 | 5.85 |
| Q9D0B6 | Protein PBDC1<br>OS=Mus musculus GN=Pbdc1<br>PE=2 SV=1 -<br>[PBDC1_MOUSE]                                                      | 33.33 | 2 | 6  | 6  | 10 | 0.91 | 0.76 | 0.84 | 0.85 | 0.93 | 0.95 | 0.91 | 0.97 | 0.95 | 0.80 | 0.78 | 0.74 | 0.81 | 22.21  | 4.55 |
| P02798 | Metallothionein-2<br>OS=Mus musculus GN=Mt2<br>PE=1 SV=2 -<br>[MT2_MOUSE]                                                      | 19.67 | 1 | 1  | 1  | 5  | 1.29 | 0.78 | 0.60 | 0.97 | 0.72 | 0.98 | 0.76 | 0.97 | 0.70 | 0.80 | 0.66 | 0.91 | 0.63 | 6.11   | 7.83 |

|          |                                                                                                          |       |   |   |   |    |      |      |      |      |      |      |      |      |      |      |      |      |      |        |      |
|----------|----------------------------------------------------------------------------------------------------------|-------|---|---|---|----|------|------|------|------|------|------|------|------|------|------|------|------|------|--------|------|
| Q8C5H8-2 | Isoform 2 of NAD kinase 2, mitochondrial OS=Mus musculus GN=Nadk2 - [NAKD2_MOUSE]                        | 20.52 | 4 | 6 | 6 | 16 | 1.05 | 1.08 | 1.00 | 1.12 | 1.07 | 1.03 | 0.94 | 0.97 | 0.90 | 1.05 | 1.03 | 1.12 | 1.04 | 43.28  | 8.85 |
| D3YVK0   | Abhydrolase domain containing 11, isoform CRA_b OS=Mus musculus GN=Abhd11 PE=4 SV=1 - [D3YVK0_MOUSE]     | 3.52  | 2 | 1 | 1 | 1  | 1.01 | 1.05 | 1.04 | 1.07 | 1.06 | 0.97 | 0.96 | 0.97 | 0.96 | 0.93 | 0.92 | 1.13 | 1.12 | 24.87  | 8.24 |
| Q9R0P3   | S-formylglutathione hydrolase OS=Mus musculus GN=Esd PE=2 SV=1 - [ESTD_MOUSE]                            | 34.75 | 8 | 7 | 7 | 23 | 1.06 | 0.95 | 0.92 | 1.16 | 0.96 | 0.93 | 0.86 | 0.97 | 0.95 | 1.01 | 0.95 | 1.01 | 0.94 | 31.30  | 7.12 |
| Q61335   | B-cell receptor-associated protein 31 OS=Mus musculus GN=Bcap31 PE=1 SV=4 - [BAP31_MOUSE]                | 24.49 | 1 | 6 | 6 | 11 | 1.05 | 0.86 | 0.89 | 1.15 | 1.09 | 0.94 | 1.01 | 0.97 | 0.95 | 0.98 | 0.98 | 0.96 | 0.88 | 27.94  | 8.70 |
| A2A5K2   | Phospholipid transfer protein OS=Mus musculus GN=Pltp PE=2 SV=1 - [A2A5K2_MOUSE]                         | 6.58  | 2 | 1 | 1 | 3  | 0.78 | 0.85 | 1.08 | 0.99 | 1.26 | 0.82 | 1.05 | 0.97 | 1.23 | 0.87 | 1.12 | 0.76 | 0.98 | 48.99  | 6.47 |
| Q8VCY8-  | Isoform 2 of Lipid phosphate phosphatase-related protein type 2 OS=Mus musculus GN=Lppr2 - [LPPR2_MOUSE] | 10.84 | 2 | 3 | 3 | 9  | 1.08 | 1.18 | 1.13 | 1.29 | 1.17 | 0.93 | 0.83 | 0.97 | 0.84 | 0.98 | 0.85 | 1.10 | 0.99 | 48.38  | 9.45 |
| Q8BHL3   | TBC1 domain family member 10B OS=Mus musculus GN=Tbc1d10b PE=1 SV=2 - [TB10B_MOUSE]                      | 19.42 | 1 | 9 | 9 | 29 | 1.02 | 0.89 | 0.95 | 1.03 | 1.11 | 1.00 | 1.00 | 0.97 | 0.98 | 1.01 | 1.04 | 0.98 | 0.91 | 87.22  | 8.90 |
| D3Z2J6   | Thioredoxin-related transmembrane protein 2 OS=Mus musculus GN=Tmx2 PE=2 SV=1 - [D3Z2J6_MOUSE]           | 25.68 | 2 | 5 | 5 | 20 | 1.27 | 1.25 | 1.04 | 1.32 | 1.10 | 0.88 | 0.77 | 0.97 | 0.75 | 0.92 | 0.96 | 1.04 | 0.92 | 29.57  | 8.72 |
| O88845   | A-kinase anchor protein 10, mitochondrial OS=Mus musculus GN=Akap10 PE=1 SV=3 - [AKA10_MOUSE]            | 13.44 | 3 | 6 | 6 | 11 | 0.96 | 1.08 | 1.14 | 1.06 | 1.09 | 0.98 | 1.03 | 0.97 | 0.98 | 0.99 | 1.09 | 1.03 | 1.06 | 73.59  | 6.79 |
| P84096   | Rho-related GTP-binding protein RhoG OS=Mus musculus GN=Rhog PE=2 SV=1 - [RHOG_MOUSE]                    | 60.73 | 8 | 8 | 9 | 40 | 1.02 | 1.03 | 1.07 | 1.10 | 1.07 | 1.05 | 0.94 | 0.97 | 0.94 | 1.05 | 0.97 | 1.11 | 1.08 | 21.29  | 8.12 |
| Q3TES0   | IQ motif and SEC7 domain-containing protein 3 OS=Mus musculus GN=Iqsec3 PE=1 SV=1 - [IQEC3_MOUSE]        | 8.54  | 2 | 7 | 7 | 12 | 0.92 | 0.91 | 0.97 | 0.97 | 1.05 | 0.87 | 0.81 | 0.97 | 0.90 | 1.01 | 1.03 | 0.95 | 1.00 | 129.04 | 6.19 |

|        |                                                                                                   |       |    |    |    |     |      |      |      |      |      |      |      |      |      |      |      |      |      |        |      |
|--------|---------------------------------------------------------------------------------------------------|-------|----|----|----|-----|------|------|------|------|------|------|------|------|------|------|------|------|------|--------|------|
| F6ZFT1 | Acyl carrier protein (Fragment) OS=Mus musculus GN=Ndufab1 PE=2 SV=1 - [F6ZFT1_MOUSE]             | 35.43 | 3  | 5  | 6  | 31  | 1.02 | 0.64 | 0.54 | 0.90 | 0.74 | 1.03 | 0.94 | 0.97 | 0.91 | 0.90 | 0.72 | 0.90 | 0.72 | 14.30  | 4.77 |
| Q9R1Z7 | 6-pyruvoyl tetrahydrobiopterin synthase OS=Mus musculus GN=Pts PE=2 SV=2 - [PTPS_MOUSE]           | 49.31 | 1  | 5  | 5  | 13  | 1.26 | 0.84 | 0.79 | 0.88 | 0.79 | 1.02 | 0.82 | 0.97 | 0.84 | 0.94 | 0.83 | 0.93 | 0.85 | 16.18  | 6.52 |
| E9PYL4 | H(+)/Cl(-) exchange transporter 7 OS=Mus musculus GN=Clen7 PE=2 SV=1 - [E9PYL4_MOUSE]             | 2.43  | 2  | 1  | 1  | 1   | 0.88 | 2.46 | 2.79 | 1.88 | 2.13 | 1.33 | 1.50 | 0.97 | 1.10 | 1.30 | 1.47 | 1.99 | 2.27 | 86.44  | 6.90 |
| Q6ZWU9 | 40S ribosomal protein S27 OS=Mus musculus GN=Rps27 PE=1 SV=3 - [RS27_MOUSE]                       | 28.57 | 4  | 2  | 2  | 6   | 0.98 | 0.90 | 1.02 | 1.07 | 1.00 | 1.00 | 1.04 | 0.97 | 1.06 | 0.94 | 1.03 | 1.05 | 1.07 | 9.45   | 9.45 |
| Q91ZS3 | Glyoxylate reductase/hydroxypyruvate reductase OS=Mus musculus GN=Grhpr PE=1 SV=1 - [GRHPR_MOUSE] | 42.07 | 3  | 11 | 11 | 25  | 1.04 | 1.04 | 1.10 | 1.07 | 1.02 | 0.99 | 0.93 | 0.97 | 0.94 | 1.02 | 1.03 | 1.07 | 1.21 | 35.31  | 7.65 |
| Q9JMA1 | Ubiquitin carboxyl-terminal hydrolase 14 OS=Mus musculus GN=Usp14 PE=1 SV=3 - [UBP14_MOUSE]       | 46.65 | 3  | 18 | 18 | 69  | 1.07 | 1.06 | 0.98 | 1.01 | 0.99 | 1.03 | 0.99 | 0.97 | 0.96 | 0.98 | 0.91 | 1.05 | 1.00 | 55.97  | 5.24 |
| M0QWJ9 | Protein Tmem178b OS=Mus musculus GN=Tmem178b PE=4 SV=1 - [M0QWJ9_MOUSE]                           | 6.98  | 1  | 1  | 1  | 2   | 1.09 | 1.05 | 0.96 | 1.12 | 1.03 | 0.84 | 0.76 | 0.97 | 0.89 | 0.92 | 0.85 | 0.95 | 0.87 | 19.43  | 9.77 |
| Q7TTS0 | Serine/threonine-protein kinase MRCK beta OS=Mus musculus GN=Cdc42pbp PE=1 SV=2 - [MRCKB_MOUSE]   | 12.26 | 18 | 14 | 18 | 34  | 0.97 | 0.86 | 1.02 | 0.98 | 1.08 | 0.87 | 0.90 | 0.97 | 0.95 | 0.99 | 0.96 | 0.96 | 1.01 | 194.63 | 6.46 |
| Q8VC42 | Uncharacterized protein C18orf8 homolog OS=Mus musculus GN=Mic1 PE=2 SV=1 - [MIC1_MOUSE]          | 4.41  | 1  | 2  | 2  | 4   | 0.94 | 0.92 | 0.97 | 1.07 | 1.13 | 0.94 | 1.00 | 0.97 | 1.02 | 0.93 | 0.99 | 0.93 | 0.98 | 74.87  | 7.83 |
| A2ALL9 | Protein Atp2b3 OS=Mus musculus GN=Atp2b3 PE=2 SV=1 - [A2ALL9_MOUSE]                               | 33.50 | 3  | 19 | 34 | 177 | 1.04 | 1.05 | 1.05 | 1.19 | 1.17 | 0.90 | 0.90 | 0.97 | 0.97 | 0.96 | 0.91 | 1.00 | 0.96 | 128.66 | 6.04 |
| Q9Z1R4 | Uncharacterized protein C6orf47 homolog OS=Mus musculus GN=D17h6s53e PE=2 SV=1 - [CF047_MOUSE]    | 2.39  | 1  | 1  | 1  | 1   | 1.18 | 1.01 | 0.86 | 1.16 | 0.98 | 1.10 | 0.93 | 0.97 | 0.82 | 1.08 | 0.91 | 1.05 | 0.89 | 31.99  | 6.89 |
| J3QPE8 | MCG16555 OS=Mus musculus GN=Vdac3-ps1 PE=4 SV=1 - [J3QPE8_MOUSE]                                  | 47.00 | 3  | 9  | 10 | 57  | 1.10 | 1.12 | 0.99 | 1.18 | 1.04 | 1.03 | 0.94 | 0.97 | 0.87 | 1.02 | 0.92 | 1.12 | 1.02 | 30.68  | 8.66 |

|          |                                                                                                                                                      |       |   |    |    |    |      |      |      |      |      |      |      |      |      |      |      |      |      |        |      |
|----------|------------------------------------------------------------------------------------------------------------------------------------------------------|-------|---|----|----|----|------|------|------|------|------|------|------|------|------|------|------|------|------|--------|------|
| Q91V89   | Protein Ppp2r5d<br>OS=Mus musculus<br>GN=Ppp2r5d PE=2<br>SV=1 -<br>[Q91V89_MOUSE]                                                                    | 24.75 | 1 | 10 | 11 | 30 | 1.00 | 0.95 | 0.95 | 1.14 | 1.14 | 1.07 | 1.04 | 0.97 | 1.00 | 1.02 | 1.03 | 1.07 | 1.08 | 68.95  | 7.96 |
| G3UXW9   | COP9 signalosome<br>complex subunit 1<br>OS=Mus musculus<br>GN=Gps1 PE=4 SV=1<br>[G3UXW9_MOUSE]                                                      | 22.81 | 5 | 8  | 8  | 17 | 0.98 | 1.01 | 0.95 | 0.97 | 0.99 | 1.00 | 0.98 | 0.97 | 1.00 | 1.00 | 0.97 | 1.06 | 1.04 | 58.82  | 6.74 |
| Q9EQ9-2  | Isoform 2 of Membrane<br>associated guanylate<br>kinase, WW and PDZ<br>domain-containing<br>protein 3 OS=Mus<br>musculus GN=Magi3 -<br>[MAGI3_MOUSE] | 17.58 | 3 | 13 | 14 | 22 | 0.94 | 0.94 | 1.01 | 0.92 | 0.94 | 1.05 | 1.11 | 0.97 | 1.09 | 0.99 | 1.00 | 0.99 | 1.04 | 123.28 | 6.38 |
| Q6PNC0   | Dmx-like protein 1<br>OS=Mus musculus<br>GN=Dmx1 PE=1<br>SV=1 -<br>[DMXL1_MOUSE]                                                                     | 1.56  | 2 | 4  | 4  | 6  | 1.04 | 0.92 | 0.89 | 1.16 | 1.13 | 0.82 | 0.87 | 0.97 | 1.02 | 0.75 | 0.73 | 1.07 | 1.03 | 335.80 | 6.42 |
| Q80YD1   | ATP-dependent RNA<br>helicase SUPV3L1,<br>mitochondrial OS=Mus<br>musculus GN=Supv3l1<br>PE=2 SV=1 -<br>[SUV3_MOUSE]                                 | 3.47  | 1 | 2  | 2  | 4  | 1.37 | 1.71 | 1.24 | 0.99 | 0.72 | 0.93 | 0.68 | 0.97 | 0.70 | 0.87 | 0.63 | 1.07 | 0.78 | 86.95  | 7.84 |
| Q920Q4-2 | Isoform 2 of Vacuolar<br>protein sorting-<br>associated protein 16<br>homolog OS=Mus<br>musculus GN=Vps16 -<br>[VPS16_MOUSE]                         | 11.69 | 3 | 3  | 3  | 8  | 0.99 | 1.35 | 1.04 | 1.18 | 1.13 | 0.89 | 0.86 | 0.97 | 0.96 | 1.12 | 1.03 | 1.19 | 1.07 | 47.88  | 8.56 |
| Q75N73   | Zinc transporter ZIP14<br>OS=Mus musculus<br>GN=Slc39a14 PE=1<br>SV=1 -<br>[S39AE_MOUSE]                                                             | 1.84  | 1 | 1  | 1  | 2  | 0.97 | 0.93 | 0.95 | 1.22 | 1.25 | 0.92 | 0.94 | 0.97 | 0.99 | 1.06 | 1.09 | 1.02 | 1.05 | 53.93  | 5.27 |
| Q9JH18   | Low-density<br>lipoprotein receptor-<br>related protein 1B<br>OS=Mus musculus<br>GN=Lrp1b PE=2<br>SV=1 -<br>[LRP1B_MOUSE]                            | 2.11  | 3 | 7  | 8  | 18 | 0.99 | 1.02 | 1.00 | 1.01 | 1.00 | 1.00 | 0.99 | 0.97 | 0.93 | 0.97 | 1.02 | 1.08 | 1.04 | 513.30 | 5.39 |
| Q6ZP3    | Ubiquitin-conjugating<br>enzyme E2 O OS=Mus<br>musculus GN=Ube2o<br>PE=1 SV=3 -<br>[UBE2O_MOUSE]                                                     | 26.24 | 1 | 22 | 22 | 74 | 1.01 | 1.02 | 1.01 | 1.00 | 1.00 | 0.95 | 0.93 | 0.97 | 0.96 | 0.97 | 0.97 | 1.01 | 1.02 | 140.75 | 5.06 |
| P35282   | Ras-related protein Rab<br>21 OS=Mus musculus<br>GN=Rab21 PE=1<br>SV=4 -<br>[RAB21_MOUSE]                                                            | 23.42 | 1 | 4  | 4  | 16 | 1.13 | 1.09 | 0.99 | 1.01 | 0.92 | 0.87 | 0.82 | 0.97 | 0.85 | 1.03 | 0.92 | 1.16 | 1.03 | 24.09  | 7.94 |
| E9PY43   | Protein Erich1<br>OS=Mus musculus<br>GN=Erich1 PE=2<br>SV=1 -<br>[E9PY43_MOUSE]                                                                      | 3.92  | 1 | 1  | 1  | 2  | 0.99 | 1.16 | 1.18 | 1.10 | 1.11 | 1.09 | 1.10 | 0.97 | 0.98 | 0.94 | 0.95 | 1.02 | 1.03 | 37.33  | 5.45 |
| Q3U9G9   | Lamin-B receptor<br>OS=Mus musculus<br>GN=Lbr PE=1 SV=2 -<br>[LBR_MOUSE]                                                                             | 2.72  | 1 | 2  | 2  | 3  | 1.09 | 1.06 | 0.97 | 1.05 | 0.96 | 0.83 | 0.76 | 0.97 | 0.88 | 1.04 | 0.95 | 0.91 | 0.84 | 71.39  | 9.36 |

|        |                                                                                                                                    |       |    |    |    |     |      |      |      |      |      |      |      |      |      |      |      |      |      |        |      |
|--------|------------------------------------------------------------------------------------------------------------------------------------|-------|----|----|----|-----|------|------|------|------|------|------|------|------|------|------|------|------|------|--------|------|
| Q8K2Q5 | Coiled-coil-helix-coiled-coil-helix domain-containing protein 7<br>OS=Mus musculus<br>GN=Chchd7 PE=2<br>SV=1 -<br>[CHCH7_MOUSE]    | 58.82 | 4  | 2  | 6  | 19  | 1.00 | 0.87 | 0.96 | 0.94 | 0.96 | 1.07 | 1.11 | 0.97 | 0.79 | 0.86 | 0.87 | 0.78 | 0.86 | 10.09  | 8.51 |
| B2Z892 | 6-phosphofructo-2-kinase/fructose-2, 6-bisphosphatase 2 variant 4<br>OS=Mus musculus<br>GN=Pfkfb2 PE=2<br>SV=1 -<br>[B2Z892_MOUSE] | 7.04  | 18 | 3  | 3  | 7   | 1.11 | 0.98 | 0.88 | 1.02 | 0.93 | 1.09 | 0.94 | 0.97 | 0.85 | 1.04 | 0.90 | 1.01 | 0.94 | 57.30  | 8.16 |
| Q91YS7 | Dual-specificity mitogen-activated protein kinase kinase 2<br>OS=Mus musculus<br>GN=Map2k2 PE=2<br>SV=1 -<br>[Q91YS7_MOUSE]        | 23.75 | 3  | 4  | 9  | 29  | 1.06 | 1.04 | 1.01 | 1.10 | 1.04 | 0.99 | 0.96 | 0.97 | 0.92 | 0.93 | 1.01 | 1.19 | 1.00 | 44.27  | 7.05 |
| P37040 | NADPH--cytochrome P450 reductase<br>OS=Mus musculus<br>GN=Por PE=1 SV=2 -<br>[NCPR_MOUSE]                                          | 33.92 | 5  | 16 | 16 | 32  | 1.01 | 1.06 | 1.02 | 1.14 | 1.14 | 0.91 | 0.89 | 0.97 | 0.95 | 1.02 | 0.99 | 0.98 | 1.03 | 77.00  | 5.53 |
| Q3USB7 | Inactive phospholipase C-like protein 1<br>OS=Mus musculus<br>GN=Plcl1 PE=1 SV=3 -<br>[PLCLI_MOUSE]                                | 18.25 | 1  | 15 | 17 | 33  | 0.99 | 1.02 | 1.06 | 1.05 | 1.05 | 1.01 | 1.00 | 0.97 | 1.03 | 0.99 | 0.97 | 0.97 | 1.00 | 122.59 | 5.64 |
| Q6PIP5 | NudC domain-containing protein 1<br>OS=Mus musculus<br>GN=Nudcd1 PE=2<br>SV=2 -<br>[NUDC1_MOUSE]                                   | 12.54 | 1  | 5  | 5  | 10  | 0.93 | 1.00 | 1.10 | 1.04 | 1.12 | 0.87 | 0.88 | 0.97 | 0.87 | 0.89 | 0.85 | 0.97 | 0.84 | 66.66  | 5.30 |
| Q69Z38 | Pseudopodium-enriched atypical kinase 1<br>OS=Mus musculus<br>GN=Peak1 PE=1 SV=4 -<br>[PEAK1_MOUSE]                                | 5.36  | 1  | 7  | 7  | 14  | 0.97 | 1.02 | 0.95 | 0.87 | 0.86 | 0.99 | 1.01 | 0.97 | 1.02 | 0.91 | 0.94 | 0.92 | 0.95 | 190.98 | 6.87 |
| Q8BYA0 | Tubulin-specific chaperone D<br>OS=Mus musculus<br>GN=Tbcd PE=2 SV=1 -<br>[TBCD_MOUSE]                                             | 2.84  | 1  | 3  | 3  | 6   | 1.06 | 1.28 | 1.13 | 1.11 | 1.08 | 0.88 | 0.89 | 0.97 | 0.89 | 1.00 | 0.88 | 1.23 | 1.17 | 133.24 | 6.51 |
| P05063 | Fructose-bisphosphate aldolase C<br>OS=Mus musculus<br>GN=Aldoc PE=1 SV=4 -<br>[ALDOC_MOUSE]                                       | 84.85 | 2  | 24 | 30 | 505 | 0.99 | 1.09 | 1.08 | 1.02 | 1.01 | 0.98 | 0.98 | 0.97 | 0.98 | 0.97 | 0.98 | 0.98 | 0.99 | 39.37  | 7.12 |
| Q3TRB3 | Palmitoyltransferase ZDHHC17<br>OS=Mus musculus<br>GN=Zdhhc17 PE=2<br>SV=1 -<br>[Q3TRB3_MOUSE]                                     | 3.52  | 3  | 1  | 1  | 2   | 0.99 | 1.09 | 1.09 | 1.15 | 1.16 | 1.12 | 1.12 | 0.97 | 0.97 | 1.05 | 1.06 | 0.91 | 0.92 | 28.44  | 6.07 |
| Q792Y8 | MCG15081<br>OS=Mus musculus<br>GN=Gm10334 PE=3<br>SV=1 -<br>[Q792Y8_MOUSE]                                                         | 12.20 | 3  | 1  | 2  | 5   | 0.70 | 0.75 | 1.07 | 0.65 | 0.92 | 0.94 | 1.34 | 0.97 | 1.38 | 0.79 | 1.13 | 1.08 | 1.55 | 26.10  | 4.92 |



|          |                                                                                                                               |       |    |    |    |    |      |      |      |      |      |      |      |      |      |      |      |      |      |        |      |
|----------|-------------------------------------------------------------------------------------------------------------------------------|-------|----|----|----|----|------|------|------|------|------|------|------|------|------|------|------|------|------|--------|------|
| Q8BRR9   | Calcium/calmodulin-dependent 3',5'-cyclic nucleotide phosphodiesterase 1A OS=Mus musculus GN=Pde1a PE=2 SV=1 - [Q8BRR9_MOUSE] | 26.06 | 13 | 12 | 12 | 24 | 1.02 | 1.00 | 1.11 | 1.03 | 1.06 | 1.00 | 0.94 | 0.97 | 0.94 | 0.98 | 0.98 | 1.02 | 1.00 | 62.31  | 5.91 |
| Q8R4T1   | Cystin-1 OS=Mus musculus GN=Cys1 PE=1 SV=1 - [CYS1_MOUSE]                                                                     | 15.86 | 1  | 1  | 1  | 3  | 1.01 | 1.12 | 1.11 | 0.97 | 0.96 | 1.06 | 1.05 | 0.97 | 0.96 | 1.04 | 1.04 | 0.84 | 0.83 | 15.50  | 5.25 |
| Q923D2   | Flavin reductase (NADPH) OS=Mus musculus GN=Blvrb PE=2 SV=3 - [BLVRB_MOUSE]                                                   | 33.50 | 3  | 5  | 5  | 10 | 0.88 | 0.86 | 1.06 | 0.92 | 1.01 | 0.86 | 0.99 | 0.97 | 1.08 | 0.86 | 0.96 | 0.83 | 0.97 | 22.18  | 7.01 |
| Q8BVL3   | Sorting nexin-17 OS=Mus musculus GN=Snx17 PE=1 SV=2 - [SNX17_MOUSE]                                                           | 5.32  | 3  | 2  | 2  | 4  | 0.93 | 1.03 | 1.11 | 0.93 | 1.00 | 1.00 | 1.08 | 0.97 | 1.04 | 0.95 | 1.02 | 0.99 | 1.07 | 52.76  | 7.49 |
| Q99MX7   | Cat eye syndrome critical region protein 6 homolog OS=Mus musculus GN=Cecr6 PE=1 SV=1 - [CECR6_MOUSE]                         | 8.04  | 1  | 2  | 2  | 6  | 0.91 | 1.08 | 1.12 | 1.07 | 1.15 | 1.01 | 1.08 | 0.97 | 1.08 | 0.97 | 1.02 | 0.92 | 1.01 | 58.12  | 9.01 |
| Q9WTR1   | Transient receptor potential cation channel subfamily V member 2 OS=Mus musculus GN=Trpv2 PE=1 SV=2 - [TRPV2_MOUSE]           | 8.20  | 1  | 4  | 4  | 15 | 0.99 | 1.05 | 1.00 | 1.15 | 1.02 | 0.91 | 0.83 | 0.97 | 0.97 | 0.97 | 0.94 | 0.92 | 0.88 | 85.91  | 6.99 |
| Q5F2D9   | Arrestin, beta 2 OS=Mus musculus GN=Arb2 PE=4 SV=1 - [Q5F2D9_MOUSE]                                                           | 6.40  | 3  | 1  | 2  | 6  | 1.18 | 0.98 | 0.83 | 1.06 | 0.90 | 1.03 | 0.87 | 0.97 | 0.82 | 1.06 | 0.90 | 1.12 | 0.95 | 45.70  | 7.83 |
| A2ATK9   | Family with sequence similarity 171, member A1 OS=Mus musculus GN=Fam171a1 PE=2 SV=1 - [A2ATK9_MOUSE]                         | 14.46 | 4  | 8  | 9  | 18 | 1.08 | 1.03 | 0.95 | 0.94 | 0.86 | 1.06 | 0.97 | 0.97 | 0.94 | 0.92 | 0.85 | 1.00 | 0.85 | 97.90  | 6.40 |
| F7B6K4   | Pantothenate kinase 4 (Fragment) OS=Mus musculus GN=Pank4 PE=4 SV=1 - [F7B6K4_MOUSE]                                          | 6.55  | 3  | 2  | 3  | 5  | 1.05 | 1.59 | 1.51 | 1.23 | 1.17 | 1.03 | 0.97 | 0.97 | 0.92 | 1.13 | 1.08 | 1.17 | 1.12 | 53.24  | 6.40 |
| Q80TJ1-2 | Isoform 2 of Calcium-dependent secretion activator 1 OS=Mus musculus GN=Cadps - [CAPS1_MOUSE]                                 | 28.66 | 3  | 1  | 25 | 72 | 1.04 | 1.01 | 0.98 | 1.27 | 1.23 | 1.01 | 0.97 | 0.97 | 0.93 | 1.12 | 1.08 | 1.08 | 1.05 | 153.91 | 5.86 |
| E9Q6C7   | Latrophilin-2 OS=Mus musculus GN=Lphn2 PE=2 SV=1 - [E9Q6C7_MOUSE]                                                             | 4.24  | 5  | 5  | 5  | 11 | 0.98 | 0.94 | 1.01 | 1.05 | 0.99 | 0.95 | 1.00 | 0.97 | 0.99 | 0.89 | 0.91 | 0.91 | 0.89 | 166.47 | 6.71 |

|          |                                                                                                          |       |   |    |    |     |      |      |      |      |      |      |      |      |      |      |      |      |      |        |      |
|----------|----------------------------------------------------------------------------------------------------------|-------|---|----|----|-----|------|------|------|------|------|------|------|------|------|------|------|------|------|--------|------|
| Q9D6E4   | Tetratricopeptide repeat protein 9B OS=Mus musculus GN=Ttc9b PE=2 SV=1 - [TTC9B_MOUSE]                   | 24.69 | 1 | 2  | 3  | 9   | 0.90 | 0.95 | 1.08 | 0.93 | 1.02 | 1.04 | 1.19 | 0.97 | 1.14 | 0.84 | 0.94 | 0.91 | 1.05 | 25.89  | 9.48 |
| Q6P9N1   | Hyccin OS=Mus musculus GN=Fam126a PE=1 SV=2 - [HYCCL_MOUSE]                                              | 8.25  | 1 | 2  | 3  | 12  | 0.99 | 1.08 | 1.06 | 0.96 | 1.00 | 1.00 | 1.04 | 0.97 | 0.98 | 1.06 | 1.12 | 1.22 | 1.15 | 57.27  | 7.88 |
| Q7TQ95   | Protein lunapark OS=Mus musculus GN=Lnp PE=1 SV=1 - [LNP_MOUSE]                                          | 29.41 | 5 | 8  | 8  | 22  | 1.07 | 0.92 | 0.84 | 1.02 | 0.94 | 1.10 | 0.98 | 0.97 | 0.94 | 1.00 | 0.98 | 1.04 | 0.96 | 47.47  | 5.27 |
| Q61043-2 | Isoform 2 of Ninein OS=Mus musculus GN=Nin - [NIN_MOUSE]                                                 | 1.04  | 3 | 1  | 2  | 2   | 1.99 | 1.29 | 0.65 | 1.37 | 0.69 | 1.25 | 0.62 | 0.97 | 0.49 | 0.95 | 0.48 | 1.60 | 0.81 | 233.46 | 4.97 |
| Q571H0   | Nucleolar pre-ribosomal-associated protein 1 OS=Mus musculus GN=Urb1 PE=2 SV=2 - [NPA1P_MOUSE]           | 0.88  | 4 | 1  | 2  | 3   | 0.92 | 1.16 | 1.26 | 0.86 | 0.93 | 0.93 | 1.01 | 0.97 | 1.05 | 0.97 | 1.06 | 0.93 | 1.01 | 254.45 | 6.96 |
| Q80Z53   | 28S ribosomal protein S26, mitochondrial OS=Mus musculus GN=Mrps26 PE=2 SV=1 - [RT26_MOUSE]              | 25.00 | 1 | 4  | 4  | 8   | 1.00 | 0.85 | 0.88 | 1.02 | 1.01 | 1.07 | 1.12 | 0.97 | 0.97 | 0.99 | 0.98 | 1.05 | 1.05 | 23.43  | 9.96 |
| Q3U1Y4-  | Isoform 2 of DENN domain-containing protein 4B OS=Mus musculus GN=Dennd4b - [DEN4B_MOUSE]                | 1.24  | 3 | 1  | 1  | 2   | 0.93 | 1.25 | 1.35 | 1.24 | 1.34 | 1.13 | 1.22 | 0.97 | 1.04 | 1.21 | 1.30 | 1.26 | 1.36 | 134.05 | 8.02 |
| Q8BHA1   | Leucine-rich repeat-containing protein 24 OS=Mus musculus GN=Lrc24 PE=2 SV=1 - [LRC24_MOUSE]             | 4.41  | 1 | 1  | 1  | 2   | 1.17 | 0.91 | 0.77 | 0.94 | 0.80 | 0.88 | 0.75 | 0.97 | 0.83 | 0.89 | 0.76 | 0.98 | 0.84 | 56.30  | 8.21 |
| D3Z4M2   | Ceramide synthase 2 (Fragment) OS=Mus musculus GN=Cers2 PE=2 SV=1 - [D3Z4M2_MOUSE]                       | 6.92  | 4 | 1  | 1  | 2   | 1.17 | 1.27 | 1.09 | 1.35 | 1.16 | 1.07 | 0.91 | 0.97 | 0.83 | 1.05 | 0.90 | 0.94 | 0.81 | 15.50  | 9.64 |
| Q6P1J1   | Crmp1 protein OS=Mus musculus GN=Crmp1 PE=2 SV=1 - [Q6P1J1_MOUSE]                                        | 70.41 | 2 | 27 | 33 | 343 | 1.07 | 0.97 | 0.91 | 1.01 | 0.95 | 1.00 | 0.95 | 0.97 | 0.92 | 0.97 | 0.90 | 1.03 | 0.98 | 74.17  | 6.81 |
| Q6PB44-2 | Isoform 2 of Tyrosine-protein phosphatase non-receptor type 23 OS=Mus musculus GN=Ptpn23 - [PTN23_MOUSE] | 11.78 | 2 | 13 | 13 | 36  | 0.96 | 1.09 | 1.14 | 1.10 | 1.18 | 0.95 | 0.97 | 0.97 | 1.00 | 1.01 | 1.09 | 1.05 | 1.05 | 184.84 | 6.76 |
| B8QI35   | Liprin-alpha 3 OS=Mus musculus GN=Pplia3 PE=2 SV=1 - [B8QI35_MOUSE]                                      | 38.86 | 3 | 34 | 39 | 149 | 0.94 | 1.01 | 1.05 | 0.98 | 1.03 | 0.95 | 1.00 | 0.97 | 1.02 | 0.93 | 0.99 | 0.91 | 0.98 | 133.34 | 5.64 |
| Q8C166   | Copine-1 OS=Mus musculus GN=Cpne1 PE=1 SV=1 - [CPNE1_MOUSE]                                              | 13.81 | 9 | 5  | 5  | 12  | 1.02 | 1.16 | 1.22 | 1.15 | 1.09 | 0.93 | 0.78 | 0.97 | 0.98 | 1.04 | 0.99 | 1.06 | 1.04 | 58.85  | 5.66 |

|          |                                                                                                                                |       |    |    |    |    |      |      |      |      |      |      |      |      |      |      |      |      |      |        |      |
|----------|--------------------------------------------------------------------------------------------------------------------------------|-------|----|----|----|----|------|------|------|------|------|------|------|------|------|------|------|------|------|--------|------|
| Q91WG5   | 5'-AMP-activated protein kinase subunit gamma-2 OS=Mus musculus GN=Prkag2 PE=1 SV=2 - [AAKG2_MOUSE]                            | 12.72 | 5  | 3  | 5  | 9  | 0.93 | 1.15 | 1.09 | 1.10 | 1.21 | 1.00 | 1.07 | 0.97 | 1.04 | 1.19 | 1.08 | 1.14 | 1.19 | 62.91  | 9.36 |
| P97364   | Selenide, water dikinase 2 OS=Mus musculus GN=Sephs2 PE=1 SV=3 - [SPS2_MOUSE]                                                  | 8.63  | 1  | 2  | 2  | 6  | 1.05 | 1.21 | 1.15 | 0.98 | 0.96 | 0.85 | 0.81 | 0.97 | 0.88 | 0.88 | 0.85 | 0.93 | 0.95 | 47.80  | 6.06 |
| Q3TZZ7   | Extended synaptotagmin-2 OS=Mus musculus GN=Esy2 PE=1 SV=1 - [ESYT2_MOUSE]                                                     | 8.17  | 2  | 5  | 5  | 9  | 0.90 | 1.10 | 1.22 | 1.15 | 1.23 | 0.98 | 0.98 | 0.97 | 0.95 | 0.94 | 1.04 | 1.12 | 1.10 | 94.08  | 7.75 |
| Q03141-2 | Isoform 2 of MAP/microtubule affinity-regulating kinase 3 OS=Mus musculus GN=Mark3 - [MARK3_MOUSE]                             | 22.50 | 3  | 5  | 12 | 24 | 0.95 | 1.17 | 1.23 | 1.00 | 1.06 | 0.92 | 0.97 | 0.97 | 1.02 | 0.95 | 0.97 | 0.97 | 1.07 | 81.35  | 9.44 |
| P23116   | Eukaryotic translation initiation factor 3 subunit A OS=Mus musculus GN=EIF3a PE=1 SV=5 - [EIF3A_MOUSE]                        | 21.73 | 1  | 29 | 29 | 75 | 0.94 | 1.05 | 1.01 | 1.01 | 1.05 | 0.98 | 0.96 | 0.97 | 0.98 | 0.95 | 1.00 | 0.96 | 0.97 | 161.84 | 6.77 |
| O55128   | Histone deacetylase complex subunit SAP18 OS=Mus musculus GN=Sap18 PE=1 SV=1 - [SAP18_MOUSE]                                   | 17.65 | 5  | 3  | 3  | 5  | 0.94 | 0.72 | 0.72 | 0.96 | 1.02 | 0.98 | 1.04 | 0.97 | 1.07 | 0.90 | 0.96 | 0.86 | 0.97 | 17.58  | 9.35 |
| Q99LG2   | Transportin-2 OS=Mus musculus GN=Tnpo2 PE=2 SV=1 - [TNPO2_MOUSE]                                                               | 9.81  | 2  | 3  | 4  | 7  | 1.09 | 1.17 | 1.13 | 1.05 | 0.93 | 0.85 | 0.78 | 0.97 | 0.79 | 1.01 | 0.82 | 1.06 | 0.98 | 100.39 | 4.98 |
| J3QP81   | CLIP-associating protein 1 OS=Mus musculus GN=Clasp1 PE=4 SV=1 - [J3QP81_MOUSE]                                                | 10.69 | 6  | 11 | 13 | 24 | 0.94 | 1.16 | 1.20 | 1.08 | 1.04 | 0.91 | 0.92 | 0.97 | 0.98 | 0.96 | 0.99 | 1.06 | 1.10 | 160.82 | 8.68 |
| Q3U0K8-  | Isoform 2 of 2-oxoglutarate and iron-dependent oxygenase domain-containing protein 1 OS=Mus musculus GN=Ogfod1 - [OGFD1_MOUSE] | 7.97  | 4  | 3  | 3  | 6  | 0.92 | 0.92 | 1.03 | 0.88 | 0.97 | 0.99 | 1.17 | 0.97 | 1.07 | 0.97 | 1.10 | 0.95 | 1.05 | 57.82  | 4.91 |
| Q3UU96-  | Isoform 2 of Serine/threonine-protein kinase MRCK alpha OS=Mus musculus GN=Cdc42bpa - [MRCKA_MOUSE]                            | 7.43  | 20 | 6  | 9  | 19 | 1.02 | 1.15 | 1.07 | 1.07 | 1.02 | 0.98 | 0.95 | 0.97 | 0.98 | 1.01 | 0.96 | 0.99 | 1.00 | 173.72 | 6.35 |
| A2AW19   | Endophilin-B2 OS=Mus musculus GN=Sh3glb2 PE=4 SV=1 - [A2AW19_MOUSE]                                                            | 40.37 | 2  | 1  | 13 | 61 | 0.92 | 0.77 | 0.84 | 0.97 | 1.00 | 0.95 | 1.00 | 0.97 | 1.02 | 0.91 | 0.93 | 0.82 | 0.86 | 41.78  | 5.97 |

|          |                                                                                                                  |       |   |    |    |    |      |      |      |      |      |       |       |      |      |      |      |      |      |        |      |
|----------|------------------------------------------------------------------------------------------------------------------|-------|---|----|----|----|------|------|------|------|------|-------|-------|------|------|------|------|------|------|--------|------|
| Q8BYY4   | Protein Supt3 OS=Mus musculus GN=Supt3 PE=2 SV=1 - [Q8BYY4_MOUSE]                                                | 3.21  | 1 | 1  | 1  | 2  | 0.89 | 1.16 | 1.30 | 0.84 | 0.94 | 0.96  | 1.06  | 0.97 | 1.08 | 1.05 | 1.18 | 1.13 | 1.27 | 41.21  | 8.54 |
| Q9CX66   | Uncharacterized protein C1Zorf45 homolog OS=Mus musculus GN=D10Wsu102e PE=2 SV=1 - [CL045_MOUSE]                 | 31.35 | 1 | 3  | 3  | 6  | 0.81 | 0.84 | 1.05 | 0.83 | 0.98 | 1.02  | 1.22  | 0.97 | 1.19 | 1.07 | 1.24 | 0.87 | 0.97 | 19.95  | 4.84 |
| Q02105   | Complement C1q subcomponent subunit C OS=Mus musculus GN=C1qc PE=2 SV=2 [C1QC_MOUSE]                             | 12.60 | 1 | 2  | 2  | 19 | 0.96 | 1.02 | 1.13 | 0.97 | 1.02 | 0.98  | 0.94  | 0.97 | 1.01 | 1.01 | 1.00 | 0.97 | 1.07 | 25.97  | 8.54 |
| Q8VIG3   | Radial spoke head 1 homolog OS=Mus musculus GN=Rsph1 PE=1 SV=2 - [RSPH1_MOUSE]                                   | 3.32  | 1 | 1  | 1  | 7  | 1.44 | 1.23 | 0.73 | 0.99 | 0.64 | 1.33  | 0.92  | 0.97 | 0.67 | 1.46 | 0.96 | 1.34 | 0.93 | 34.16  | 4.53 |
| Q5UIJ9   | Regulator of microtubule dynamics protein 3 OS=Mus musculus GN=Rmdn3 PE=1 SV=2 - [RMD3_MOUSE]                    | 28.09 | 4 | 9  | 9  | 18 | 0.95 | 1.03 | 1.03 | 1.06 | 1.09 | 0.87  | 0.84  | 0.97 | 1.01 | 0.95 | 1.00 | 0.92 | 1.00 | 52.00  | 5.21 |
| P13597-2 | Isoform 2 of Intercellular adhesion molecule 1 OS=Mus musculus GN=Icam1 - [ICAM1_MOUSE]                          | 1.69  | 2 | 1  | 1  | 1  | 1.10 | 1.16 | 1.05 | 0.84 | 0.76 | 1.05  | 0.95  | 0.97 | 0.88 | 0.85 | 0.77 | 1.01 | 0.92 | 58.72  | 6.21 |
| O09165   | Calsequestrin-1 OS=Mus musculus GN=Casq1 PE=2 SV=3 - [CASQ1_MOUSE]                                               | 13.33 | 2 | 3  | 3  | 12 | 0.71 | 1.15 | 1.19 | 0.78 | 1.08 | 14.13 | 18.25 | 0.97 | 1.50 | 1.25 | 1.55 | 1.10 | 1.25 | 46.35  | 4.12 |
| A7XUY5   | Isoform 2 of Selection and upkeep of intraepithelial T-cells protein 5 OS=Mus musculus GN=Skint5 - [SKIT5_MOUSE] | 0.56  | 4 | 1  | 1  | 1  | 1.01 | 1.19 | 1.17 | 1.00 | 0.98 | 1.05  | 1.03  | 0.97 | 0.96 | 0.95 | 0.94 | 0.93 | 0.92 | 163.40 | 8.16 |
| P54823   | Probable ATP-dependent RNA helicase DDX6 OS=Mus musculus GN=Ddx6 PE=2 SV=1 - [DDX6_MOUSE]                        | 36.85 | 1 | 11 | 11 | 44 | 0.98 | 1.09 | 1.00 | 1.02 | 1.01 | 0.99  | 1.00  | 0.97 | 0.95 | 0.96 | 0.98 | 0.97 | 1.01 | 54.16  | 8.66 |
| Q8CAG6   | Pleckstrin OS=Mus musculus GN=Plek PE=2 SV=1 - [Q8CAG6_MOUSE]                                                    | 4.28  | 2 | 1  | 1  | 2  | 1.06 | 1.27 | 1.19 | 0.90 | 0.85 | 1.02  | 0.96  | 0.97 | 0.92 | 1.05 | 1.00 | 1.04 | 0.99 | 37.13  | 7.43 |
| Q9D419   | RAB23, member RAS oncogene family, isoform CRA_a OS=Mus musculus GN=Rab23 PE=2 SV=1 - [Q9D419_MOUSE]             | 48.10 | 3 | 9  | 9  | 17 | 1.15 | 1.00 | 0.93 | 1.07 | 0.93 | 1.05  | 0.95  | 0.97 | 0.80 | 1.06 | 0.93 | 1.15 | 0.96 | 26.76  | 7.30 |
| Q8C6E0   | Coiled-coil domain-containing protein 104 OS=Mus musculus GN=Ccdc104 PE=2 SV=1 - [CC104_MOUSE]                   | 68.51 | 2 | 16 | 16 | 46 | 1.06 | 0.86 | 0.75 | 0.92 | 0.86 | 1.03  | 0.99  | 0.97 | 0.92 | 0.90 | 0.84 | 0.89 | 0.89 | 39.58  | 4.93 |

|          |                                                                                                                |       |    |    |    |      |      |      |      |      |      |      |      |      |      |      |      |      |      |        |      |
|----------|----------------------------------------------------------------------------------------------------------------|-------|----|----|----|------|------|------|------|------|------|------|------|------|------|------|------|------|------|--------|------|
| Q8K2U2   | Alpha-ketoglutarate-dependent dioxygenase alkB homolog 6 OS=Mus musculus GN=Alkbh6 PE=2 SV=2 - [ALKB6_MOUSE]   | 3.40  | 2  | 1  | 1  | 3    | 1.30 | 1.00 | 0.77 | 1.03 | 0.85 | 1.16 | 0.89 | 0.97 | 0.72 | 0.99 | 0.77 | 1.04 | 0.86 | 26.39  | 7.55 |
| Q921K2   | Poly (ADP-ribose) polymerase family, member 1 OS=Mus musculus GN=Parp1 PE=2 SV=1 - [Q921K2_MOUSE]              | 15.78 | 3  | 11 | 11 | 22   | 0.95 | 0.82 | 0.89 | 0.98 | 1.04 | 1.02 | 1.09 | 0.97 | 1.01 | 0.93 | 0.98 | 0.89 | 1.01 | 112.65 | 8.95 |
| P39053-4 | Isoform 4 of Dynamein-1 OS=Mus musculus GN=Dnm1 - [DYN1_MOUSE]                                                 | 70.14 | 15 | 3  | 55 | 507  | 0.97 | 1.18 | 1.11 | 1.04 | 1.08 | 1.00 | 0.96 | 0.97 | 1.02 | 0.96 | 0.99 | 1.08 | 1.11 | 97.36  | 7.17 |
| Q8QZZ7   | TP53RK-binding protein OS=Mus musculus GN=Tprkb PE=2 SV=1 - [TPRKB_MOUSE]                                      | 6.29  | 1  | 1  | 1  | 2    | 0.91 | 1.11 | 1.21 | 0.84 | 0.92 | 0.90 | 0.98 | 0.97 | 1.06 | 0.97 | 1.06 | 1.07 | 1.17 | 19.54  | 7.39 |
| P70408   | Cadherin-10 OS=Mus musculus GN=Cdh10 PE=2 SV=3 - [CAD10_MOUSE]                                                 | 16.75 | 2  | 6  | 10 | 21   | 0.90 | 0.93 | 1.12 | 0.98 | 1.14 | 1.01 | 1.11 | 0.97 | 1.14 | 0.94 | 1.12 | 0.83 | 0.98 | 88.26  | 4.94 |
| Q8VDN2   | Sodium/potassium-transporting ATPase subunit alpha-1 OS=Mus musculus GN=Atp1a1 PE=1 SV=1 - [AT1A1_MOUSE]       | 53.47 | 1  | 31 | 54 | 1204 | 0.93 | 1.05 | 1.09 | 1.10 | 1.18 | 0.93 | 0.97 | 0.97 | 1.03 | 0.94 | 1.01 | 0.91 | 0.96 | 112.91 | 5.45 |
| Q3V0K9   | Plastin-1 OS=Mus musculus GN=Pls1 PE=2 SV=1 - [PLS1_MOUSE]                                                     | 5.24  | 1  | 1  | 3  | 5    | 0.94 | 1.47 | 1.57 | 1.09 | 1.16 | 0.92 | 0.98 | 0.97 | 1.04 | 0.93 | 0.99 | 1.00 | 1.06 | 70.36  | 5.38 |
| A2AWA9   | Rab GTPase-activating protein 1 OS=Mus musculus GN=Rabgap1 PE=2 SV=1 - [RBGP1_MOUSE]                           | 17.86 | 5  | 16 | 18 | 47   | 0.93 | 0.99 | 1.07 | 1.08 | 1.11 | 1.01 | 1.04 | 0.97 | 1.03 | 0.95 | 1.06 | 0.94 | 1.05 | 120.72 | 5.25 |
| Q99L47   | Hsc70-interacting protein OS=Mus musculus GN=St13 PE=2 SV=1 - [F10A1_MOUSE]                                    | 33.42 | 4  | 13 | 13 | 94   | 0.99 | 0.74 | 0.75 | 0.90 | 0.90 | 0.97 | 0.98 | 0.97 | 0.98 | 0.89 | 0.88 | 0.85 | 0.86 | 41.63  | 5.26 |
| Q61290   | Voltage-dependent R-type calcium channel subunit alpha-1E OS=Mus musculus GN=Cacna1e PE=1 SV=1 - [CAC1E_MOUSE] | 11.49 | 2  | 17 | 17 | 40   | 1.04 | 1.22 | 1.17 | 1.09 | 1.05 | 0.97 | 0.97 | 0.97 | 1.01 | 0.96 | 0.97 | 1.06 | 1.08 | 257.07 | 8.18 |
| P15209   | BDNF/NT-3 growth factors receptor OS=Mus musculus GN=Ntrk2 PE=1 SV=1 - [NTRK2_MOUSE]                           | 18.76 | 4  | 7  | 10 | 25   | 0.99 | 0.93 | 1.07 | 1.02 | 1.07 | 0.94 | 0.95 | 0.97 | 0.95 | 1.00 | 1.00 | 0.99 | 0.98 | 92.07  | 6.55 |
| O88998   | Noelin OS=Mus musculus GN=Olfm1 PE=1 SV=1 - [NOE1_MOUSE]                                                       | 31.13 | 7  | 11 | 11 | 68   | 1.04 | 1.01 | 1.03 | 0.94 | 0.95 | 0.94 | 0.91 | 0.97 | 0.95 | 0.87 | 0.86 | 0.94 | 0.92 | 55.36  | 6.95 |

|          |                                                                                                                                       |       |   |    |    |     |      |      |      |      |      |      |      |      |      |      |      |      |      |        |      |
|----------|---------------------------------------------------------------------------------------------------------------------------------------|-------|---|----|----|-----|------|------|------|------|------|------|------|------|------|------|------|------|------|--------|------|
| P56565   | Protein S100-A1<br>OS=Mus musculus<br>GN=S100a1 PE=1<br>SV=2 -<br>[S10A1_MOUSE]                                                       | 29.79 | 2 | 2  | 2  | 108 | 1.14 | 0.80 | 0.65 | 0.95 | 0.77 | 1.03 | 0.87 | 0.97 | 0.84 | 0.88 | 0.73 | 0.96 | 0.80 | 10.50  | 4.50 |
| Q3TLS3   | GDP-D-glucose<br>phosphorylase 1<br>OS=Mus musculus<br>GN=Gdpgp1 PE=2<br>SV=2 -<br>[GDPPP1_MOUSE]                                     | 10.36 | 1 | 3  | 3  | 8   | 1.09 | 1.02 | 0.90 | 1.13 | 1.04 | 0.95 | 0.85 | 0.97 | 0.92 | 0.93 | 0.86 | 1.04 | 0.98 | 42.49  | 6.19 |
| E9Q7U2   | Calcium-binding and<br>coiled-coil domain-<br>containing protein 1<br>OS=Mus musculus<br>GN=Calcoco1 PE=2<br>SV=1 -<br>[E9Q7U2_MOUSE] | 41.86 | 3 | 21 | 21 | 57  | 0.90 | 0.90 | 1.02 | 0.89 | 1.00 | 0.98 | 1.14 | 0.97 | 1.14 | 0.86 | 0.99 | 0.89 | 0.99 | 70.89  | 4.86 |
| Q61361   | Brevican core protein<br>OS=Mus musculus<br>GN=Bcan PE=1 SV=2 -<br>[PGCB_MOUSE]                                                       | 38.96 | 1 | 27 | 27 | 296 | 1.02 | 1.01 | 0.96 | 0.99 | 0.97 | 0.95 | 0.95 | 0.97 | 0.94 | 0.93 | 0.96 | 0.96 | 0.95 | 95.75  | 4.93 |
| E9PWG2   | Protein Trappc8<br>OS=Mus musculus<br>GN=Trappc8 PE=2<br>SV=1 -<br>[E9PWG2_MOUSE]                                                     | 3.55  | 2 | 4  | 4  | 6   | 1.05 | 1.01 | 0.96 | 1.02 | 0.98 | 0.92 | 0.84 | 0.97 | 0.98 | 0.98 | 0.93 | 1.16 | 1.17 | 160.81 | 7.01 |
| Q9JIG8   | PRA1 family protein 2<br>OS=Mus musculus<br>GN=Praf2 PE=2 SV=1<br>- [PRAF2_MOUSE]                                                     | 6.18  | 1 | 1  | 1  | 4   | 0.95 | 1.03 | 1.08 | 1.18 | 1.24 | 1.00 | 1.04 | 0.97 | 1.02 | 1.09 | 1.15 | 1.05 | 1.10 | 19.47  | 9.60 |
| Q9WVG6   | Isoform 2 of Histone-<br>arginine<br>methyltransferase<br>CARM1 OS=Mus<br>musculus GN=Carm1 -<br>[CARM1_MOUSE]                        | 3.93  | 4 | 2  | 2  | 5   | 1.02 | 1.14 | 1.12 | 1.07 | 1.05 | 0.99 | 0.96 | 0.97 | 0.95 | 1.07 | 1.05 | 1.08 | 1.06 | 63.42  | 6.61 |
| F6TBK9   | Supervillin (Fragment)<br>OS=Mus musculus<br>GN=Svl PE=4 SV=1 -<br>[F6TBK9_MOUSE]                                                     | 10.59 | 1 | 1  | 1  | 4   | 1.30 | 1.19 | 0.92 | 0.98 | 0.75 | 1.04 | 0.80 | 0.98 | 0.75 | 1.06 | 0.82 | 1.15 | 0.89 | 19.03  | 5.82 |
| Q91Y09   | Protein Pcdha9<br>OS=Mus musculus<br>GN=Pcdha2 PE=2<br>SV=1 -<br>[Q91Y09_MOUSE]                                                       | 3.08  | 9 | 2  | 2  | 4   | 1.10 | 1.20 | 1.09 | 1.14 | 1.04 | 1.11 | 1.00 | 0.98 | 0.88 | 1.05 | 0.96 | 1.06 | 0.96 | 109.42 | 5.47 |
| Q8R3N1   | Nucleolar protein 14<br>OS=Mus musculus<br>GN=Nop14 PE=1<br>SV=2 -<br>[NOP14_MOUSE]                                                   | 1.40  | 1 | 1  | 1  | 1   | 0.87 | 0.87 | 1.00 | 0.92 | 1.06 | 0.96 | 1.10 | 0.98 | 1.11 | 1.03 | 1.18 | 0.88 | 1.01 | 98.71  | 7.59 |
| Q924D1   | Cytochrome P450<br>CYP2J9 OS=Mus<br>musculus GN=Cyp2j9<br>PE=2 SV=1 -<br>[Q924D1_MOUSE]                                               | 4.58  | 1 | 2  | 2  | 4   | 0.92 | 1.17 | 1.27 | 1.03 | 1.11 | 0.79 | 0.85 | 0.98 | 1.06 | 1.02 | 1.11 | 0.97 | 1.06 | 57.90  | 7.75 |
| Q9WUR2   | Isoform 2 of Enoyl-<br>CoA delta isomerase 2,<br>mitochondrial OS=Mus<br>musculus GN=Eci2 -<br>[ECI2_MOUSE]                           | 17.32 | 9 | 4  | 4  | 9   | 0.91 | 0.75 | 0.82 | 0.98 | 1.11 | 0.97 | 1.03 | 0.98 | 1.21 | 0.93 | 1.07 | 0.99 | 1.14 | 39.48  | 8.43 |
| Q69ZR9-2 | Isoform 2 of Protein<br>FAM208A OS=Mus<br>musculus<br>GN=Fam208a -<br>[F208A_MOUSE]                                                   | 0.73  | 2 | 1  | 1  | 2   | 1.03 | 0.97 | 0.93 | 1.03 | 0.99 | 1.00 | 0.96 | 0.98 | 0.94 | 1.05 | 1.01 | 1.07 | 1.04 | 168.72 | 6.01 |

|          |                                                                                                                         |       |   |    |    |     |      |      |      |      |      |      |      |      |      |      |      |      |      |        |      |
|----------|-------------------------------------------------------------------------------------------------------------------------|-------|---|----|----|-----|------|------|------|------|------|------|------|------|------|------|------|------|------|--------|------|
| P27671   | Ras-specific guanine nucleotide-releasing factor 1 OS=Mus musculus GN=Rasgrf1 PE=1 SV=2 - [RGRF1_MOUSE]                 | 8.40  | 1 | 7  | 8  | 15  | 1.00 | 0.93 | 1.03 | 1.11 | 1.10 | 0.96 | 1.03 | 0.98 | 1.06 | 0.99 | 0.97 | 0.92 | 1.05 | 144.01 | 7.17 |
| Q8C050-2 | Isoform 1 of Ribosomal protein S6 kinase alpha-5 OS=Mus musculus GN=Rps6ka5 - [KS6A5_MOUSE]                             | 3.13  | 2 | 2  | 2  | 7   | 1.08 | 1.42 | 1.29 | 1.12 | 1.05 | 1.13 | 1.04 | 0.98 | 0.96 | 1.21 | 1.11 | 1.19 | 1.02 | 89.46  | 7.25 |
| P59114   | Phosphorylated CTD-interacting factor 1 OS=Mus musculus GN=Pcif1 PE=1 SV=1 - [PCIF1_MOUSE]                              | 3.40  | 1 | 2  | 2  | 3   | 0.96 | 0.94 | 0.97 | 1.10 | 1.14 | 1.09 | 1.13 | 0.98 | 1.01 | 1.00 | 1.05 | 1.11 | 1.16 | 80.45  | 7.64 |
| O88696   | Putative ATP-dependent Clp protease proteolytic subunit, mitochondrial OS=Mus musculus GN=Clpp PE=2 SV=1 - [CLPP_MOUSE] | 22.06 | 1 | 4  | 4  | 7   | 1.01 | 1.06 | 1.15 | 1.18 | 1.05 | 1.10 | 1.05 | 0.98 | 1.02 | 1.05 | 1.03 | 1.18 | 1.11 | 29.78  | 7.47 |
| Q7TPR4   | Alpha-actinin-1 OS=Mus musculus GN=Actin1 PE=1 SV=1 - [ACTN1_MOUSE]                                                     | 63.00 | 1 | 1  | 53 | 311 | 1.04 | 1.97 | 1.90 | 1.10 | 1.06 | 1.03 | 0.98 | 0.98 | 0.94 | 0.94 | 0.91 | 0.83 | 0.81 | 103.00 | 5.38 |
| Q99LB6-2 | Isoform 2 of Methionine adenosyltransferase 2 subunit beta OS=Mus musculus GN=Mat2b - [MAT2B_MOUSE]                     | 28.17 | 3 | 7  | 7  | 22  | 0.94 | 1.02 | 1.11 | 1.02 | 1.03 | 0.80 | 0.82 | 0.98 | 0.95 | 0.87 | 0.85 | 0.90 | 0.95 | 36.19  | 6.60 |
| Q4VBE8   | WD repeat-containing protein 18 OS=Mus musculus GN=Wdr18 PE=1 SV=1 - [WDR18_MOUSE]                                      | 7.19  | 1 | 1  | 1  | 2   | 1.11 | 0.78 | 0.70 | 1.10 | 0.99 | 0.87 | 0.78 | 0.98 | 0.88 | 0.90 | 0.82 | 0.94 | 0.85 | 47.18  | 6.89 |
| Q9CPX4   | Ferritin OS=Mus musculus GN=Fit1 PE=2 SV=1 - [Q9CPX4_MOUSE]                                                             | 44.26 | 4 | 6  | 6  | 11  | 0.97 | 0.98 | 0.84 | 0.82 | 0.86 | 0.99 | 0.99 | 0.98 | 0.83 | 0.94 | 0.88 | 1.21 | 1.19 | 20.76  | 6.00 |
| Q8BLR9-2 | Isoform 2 of Hypoxia-inducible factor 1-alpha inhibitor OS=Mus musculus GN=Hif1an - [HIF1N_MOUSE]                       | 4.18  | 2 | 1  | 1  | 2   | 0.98 | 1.09 | 1.11 | 1.19 | 1.22 | 0.96 | 0.97 | 0.98 | 0.99 | 0.97 | 0.99 | 1.22 | 1.25 | 30.41  | 6.55 |
| D3YWE6   | Protein Mn1 OS=Mus musculus GN=Mn1 PE=4 SV=1 - [D3YWE6_MOUSE]                                                           | 1.93  | 1 | 1  | 1  | 4   | 0.90 | 1.18 | 1.32 | 0.97 | 1.08 | 1.14 | 1.27 | 0.98 | 1.09 | 1.06 | 1.19 | 1.12 | 1.25 | 133.99 | 6.74 |
| Q8CC15   | RING1 and YY1-binding protein OS=Mus musculus GN=Rybp PE=1 SV=1 - [RYBP_MOUSE]                                          | 24.56 | 1 | 2  | 2  | 5   | 0.97 | 1.57 | 1.61 | 1.07 | 1.10 | 1.22 | 1.25 | 0.98 | 1.00 | 1.03 | 1.06 | 1.11 | 1.14 | 24.76  | 9.63 |
| P46061   | Ran GTPase-activating protein 1 OS=Mus musculus GN=Rangap1 PE=1 SV=2 - [RAGP1_MOUSE]                                    | 22.92 | 1 | 11 | 11 | 22  | 1.02 | 0.86 | 0.90 | 1.14 | 1.09 | 1.06 | 1.01 | 0.98 | 0.96 | 1.06 | 1.07 | 1.01 | 1.04 | 63.49  | 4.68 |

|          |                                                                                                         |       |   |    |    |    |      |      |      |      |      |      |      |      |      |      |      |      |      |        |       |
|----------|---------------------------------------------------------------------------------------------------------|-------|---|----|----|----|------|------|------|------|------|------|------|------|------|------|------|------|------|--------|-------|
| Q80VP1   | Epsin-1 OS=Mus musculus GN=Epn1 PE=1 SV=3 - [EPN1_MOUSE]                                                | 25.39 | 5 | 11 | 11 | 75 | 1.00 | 0.82 | 0.78 | 0.90 | 0.89 | 0.94 | 0.90 | 0.98 | 0.97 | 0.83 | 0.78 | 0.81 | 0.81 | 60.17  | 4.81  |
| B1AUN2   | MCG14442 OS=Mus musculus GN=Eif2b3 PE=4 SV=1 - [B1AUN2_MOUSE]                                           | 13.50 | 3 | 4  | 4  | 8  | 1.05 | 1.21 | 1.05 | 1.06 | 1.05 | 0.92 | 0.90 | 0.98 | 0.92 | 1.04 | 1.03 | 1.07 | 1.06 | 50.46  | 6.74  |
| P61358   | 60S ribosomal protein L27 OS=Mus musculus GN=Rpl27 PE=2 SV=2 - [RL27_MOUSE]                             | 27.94 | 3 | 3  | 3  | 12 | 0.99 | 1.37 | 1.37 | 1.21 | 1.23 | 1.12 | 1.02 | 0.98 | 0.96 | 0.96 | 0.94 | 0.97 | 0.97 | 15.79  | 10.56 |
| P53986   | Monocarboxylate transporter 1 OS=Mus musculus GN=Slc16a1 PE=1 SV=1 - [MOT1_MOUSE]                       | 7.91  | 1 | 3  | 3  | 7  | 0.99 | 1.10 | 1.03 | 1.21 | 1.25 | 0.93 | 0.89 | 0.98 | 0.96 | 0.99 | 1.01 | 0.89 | 0.91 | 53.23  | 7.47  |
| P32848   | Parvalbumin alpha OS=Mus musculus GN=Pvalb PE=1 SV=3 - [PRVA_MOUSE]                                     | 52.73 | 1 | 5  | 5  | 12 | 0.85 | 0.74 | 0.80 | 0.80 | 0.91 | 1.05 | 1.18 | 0.98 | 1.03 | 0.82 | 0.88 | 0.69 | 0.73 | 11.92  | 5.19  |
| Q99L45   | Eukaryotic translation initiation factor 2 subunit 2 OS=Mus musculus GN=Eif2s2 PE=1 SV=1 - [IF2B_MOUSE] | 56.50 | 3 | 21 | 21 | 94 | 1.08 | 0.92 | 0.88 | 0.99 | 0.91 | 0.98 | 0.93 | 0.98 | 0.91 | 0.87 | 0.84 | 0.86 | 0.84 | 38.07  | 5.80  |
| A2A699-2 | Isoform 2 of Protein FAM171A2 OS=Mus musculus GN=Fam171a2 - [F1712_MOUSE]                               | 21.63 | 2 | 8  | 9  | 25 | 0.99 | 1.02 | 1.00 | 1.01 | 1.03 | 1.03 | 1.07 | 0.98 | 1.05 | 1.02 | 1.05 | 0.95 | 0.96 | 67.77  | 7.23  |
| P22682   | E3 ubiquitin-protein ligase CBL OS=Mus musculus GN=Cbl PE=1 SV=3 - [CBL_MOUSE]                          | 16.43 | 1 | 9  | 10 | 18 | 1.01 | 0.99 | 1.11 | 1.07 | 1.11 | 1.07 | 1.07 | 0.98 | 1.00 | 1.31 | 1.15 | 1.05 | 1.06 | 100.50 | 6.67  |
| Q9CQ43   | Deoxyuridine triphosphatase OS=Mus musculus GN=Dut PE=2 SV=1 - [Q9CQ43_MOUSE]                           | 46.30 | 2 | 5  | 5  | 8  | 0.92 | 1.00 | 0.98 | 0.82 | 0.89 | 1.12 | 1.13 | 0.98 | 1.05 | 1.12 | 1.12 | 0.96 | 1.06 | 17.37  | 6.04  |
| Q9CZ04   | COP9 signalosome complex subunit 7a OS=Mus musculus GN=Cops7a PE=1 SV=2 - [CSN7A_MOUSE]                 | 52.73 | 5 | 10 | 10 | 24 | 1.03 | 0.95 | 0.91 | 1.09 | 0.98 | 0.96 | 0.98 | 0.98 | 0.94 | 0.99 | 0.99 | 0.98 | 0.98 | 30.21  | 7.87  |
| Q91WC0   | Histone-lysine N-methyltransferase setd3 OS=Mus musculus GN=Setd3 PE=1 SV=1 - [SETD3_MOUSE]             | 10.27 | 6 | 4  | 4  | 6  | 1.01 | 1.13 | 1.11 | 1.13 | 1.17 | 0.96 | 0.95 | 0.98 | 0.97 | 1.02 | 1.03 | 1.14 | 1.14 | 67.13  | 5.60  |
| Q8BXV2   | BRI3-binding protein OS=Mus musculus GN=Bri3bp PE=2 SV=1 - [BRI3B_MOUSE]                                | 11.07 | 1 | 2  | 2  | 4  | 1.21 | 1.21 | 0.99 | 1.10 | 0.90 | 1.06 | 0.87 | 0.98 | 0.80 | 1.04 | 0.86 | 1.13 | 0.93 | 28.25  | 9.52  |



|          |                                                                                                              |       |    |   |    |    |      |      |      |      |      |      |      |      |      |      |      |      |      |        |       |
|----------|--------------------------------------------------------------------------------------------------------------|-------|----|---|----|----|------|------|------|------|------|------|------|------|------|------|------|------|------|--------|-------|
| Q8BNN1   | Spermatogenesis-associated protein 2-like protein OS=Mus musculus GN=Spata2l PE=2 SV=1 - [SPA2L_MOUSE]       | 12.21 | 1  | 3 | 3  | 8  | 1.04 | 1.30 | 1.22 | 1.00 | 0.99 | 1.07 | 1.03 | 0.98 | 0.94 | 1.19 | 1.15 | 1.26 | 1.24 | 46.74  | 5.20  |
| P62320   | Small nuclear ribonucleoprotein Sm D3 OS=Mus musculus GN=Snrpd3 PE=1 SV=1 - [SMD3_MOUSE]                     | 31.75 | 1  | 3 | 3  | 11 | 1.00 | 1.12 | 1.12 | 0.98 | 0.93 | 0.89 | 0.89 | 0.98 | 0.95 | 0.99 | 0.92 | 0.89 | 0.95 | 13.91  | 10.32 |
| POCL69   | Zinc finger protein 703 OS=Mus musculus GN=Znf703 PE=1 SV=1 - [ZN703_MOUSE]                                  | 2.19  | 1  | 1 | 1  | 2  | 0.96 | 0.69 | 0.72 | 0.85 | 0.88 | 1.13 | 1.17 | 0.98 | 1.01 | 0.88 | 0.91 | 0.85 | 0.88 | 58.69  | 8.79  |
| Q7TN99-3 | Isoform 3 of Cytoplasmic polyadenylation element-binding protein 3 OS=Mus musculus GN=Cpeb3 - [CPEB3_MOUSE]  | 27.85 | 12 | 7 | 12 | 30 | 1.00 | 1.02 | 1.04 | 1.00 | 0.97 | 0.99 | 0.99 | 0.98 | 0.92 | 1.03 | 1.04 | 1.06 | 1.08 | 75.64  | 7.23  |
| O09012-2 | Isoform 2 of Peroxisomal targeting signal 1 receptor OS=Mus musculus GN=Pex5 - [PEX5_MOUSE]                  | 8.80  | 3  | 4 | 4  | 8  | 1.07 | 1.11 | 1.18 | 0.91 | 0.85 | 0.98 | 1.01 | 0.98 | 0.92 | 1.01 | 0.98 | 0.97 | 0.90 | 66.76  | 4.55  |
| Q9CXV9   | DCN1-like protein 5 OS=Mus musculus GN=Dcn1d5 PE=2 SV=1 - [DCNL5_MOUSE]                                      | 6.75  | 1  | 1 | 1  | 2  | 0.95 | 1.22 | 1.28 | 0.77 | 0.81 | 1.03 | 1.08 | 0.98 | 1.02 | 0.98 | 1.04 | 0.90 | 0.95 | 27.56  | 5.44  |
| Q8BX10   | Serine/threonine-protein phosphatase PGAM5, mitochondrial OS=Mus musculus GN=Pgam5 PE=2 SV=1 - [PGAM5_MOUSE] | 27.08 | 3  | 6 | 6  | 17 | 0.98 | 0.95 | 1.10 | 1.03 | 1.12 | 0.98 | 1.04 | 0.98 | 0.92 | 0.94 | 0.92 | 0.91 | 0.98 | 31.97  | 9.04  |
| P33175   | Kinesin heavy chain isoform 5A OS=Mus musculus GN=Kif5a PE=1 SV=3 - [KIF5A_MOUSE]                            | 16.07 | 1  | 7 | 13 | 37 | 0.88 | 0.98 | 0.96 | 0.95 | 1.09 | 1.02 | 1.15 | 0.98 | 0.96 | 0.97 | 1.01 | 0.90 | 0.99 | 116.95 | 5.94  |
| Q80WM4   | Hyaluronan and proteoglycan link protein 4 OS=Mus musculus GN=Hapln4 PE=2 SV=2 - [HPLN4_MOUSE]               | 18.25 | 1  | 5 | 6  | 10 | 0.88 | 1.06 | 1.19 | 0.96 | 1.08 | 0.98 | 1.08 | 0.98 | 1.12 | 0.99 | 1.11 | 1.08 | 1.03 | 42.78  | 8.85  |
| P62960   | Nuclease-sensitive element-binding protein 1 OS=Mus musculus GN=Ybx1 PE=1 SV=3 - [YBOX1_MOUSE]               | 33.54 | 5  | 6 | 8  | 37 | 1.11 | 1.18 | 1.02 | 0.98 | 0.93 | 1.01 | 0.92 | 0.98 | 0.93 | 1.02 | 0.97 | 1.00 | 0.91 | 35.71  | 9.88  |
| Q8R105   | Vacuolar protein sorting-associated protein 37C OS=Mus musculus GN=Vps37c PE=2 SV=1 - [VP37C_MOUSE]          | 28.98 | 2  | 8 | 8  | 17 | 0.85 | 0.85 | 0.98 | 0.82 | 0.94 | 0.84 | 0.95 | 0.98 | 1.10 | 0.83 | 1.00 | 0.81 | 0.94 | 38.43  | 5.31  |

|        |                                                                                                                                                      |       |    |    |    |     |      |      |      |      |      |      |      |      |      |      |      |      |      |        |       |
|--------|------------------------------------------------------------------------------------------------------------------------------------------------------|-------|----|----|----|-----|------|------|------|------|------|------|------|------|------|------|------|------|------|--------|-------|
| P15105 | Glutamine synthetase<br>OS=Mus musculus<br>GN=Glt1 PE=1 SV=6 -<br>[GLNA_MOUSE]                                                                       | 65.68 | 3  | 22 | 22 | 326 | 0.96 | 0.98 | 1.01 | 1.00 | 1.04 | 0.96 | 1.00 | 0.98 | 1.02 | 0.95 | 0.99 | 1.00 | 1.05 | 42.09  | 7.08  |
| Q9D2K6 | Protein<br>D930007J09Rik<br>OS=Mus musculus<br>GN=D930007J09Rik<br>PE=2 SV=1 -<br>[Q9D2K6_MOUSE]                                                     | 5.34  | 1  | 1  | 1  | 1   | 1.13 | 1.07 | 0.95 | 1.05 | 0.93 | 1.02 | 0.90 | 0.98 | 0.86 | 0.99 | 0.88 | 1.05 | 0.94 | 13.61  | 12.13 |
| Q640R3 | Hepatocyte cell<br>adhesion molecule<br>OS=Mus musculus<br>GN=Hepacam PE=1<br>SV=2 -<br>[HECAM_MOUSE]                                                | 32.06 | 1  | 10 | 10 | 52  | 1.02 | 1.00 | 0.97 | 0.97 | 0.99 | 0.94 | 0.94 | 0.98 | 0.90 | 0.93 | 0.92 | 0.90 | 0.90 | 46.34  | 9.42  |
| Q9DCM0 | Persulfide dioxygenase<br>ETHE1, mitochondrial<br>OS=Mus musculus<br>GN=Ethe1 PE=1 SV=2<br>- [ETHE1_MOUSE]                                           | 26.38 | 1  | 5  | 5  | 10  | 0.97 | 1.06 | 1.07 | 0.97 | 1.04 | 0.97 | 1.03 | 0.98 | 1.02 | 0.92 | 1.05 | 1.06 | 1.20 | 27.72  | 7.23  |
| Q6RHR9 | Isoform 3 of Membrane<br>associated guanylate<br>kinase, WW and PDZ<br>domain-containing<br>protein 1 OS=Mus<br>musculus GN=Magi1 -<br>[MAGH1_MOUSE] | 29.02 | 3  | 5  | 26 | 70  | 0.97 | 0.84 | 0.99 | 0.84 | 0.90 | 1.10 | 1.06 | 0.98 | 1.00 | 0.96 | 1.10 | 0.85 | 0.94 | 134.32 | 5.78  |
| Q14B11 | Protein Slc24a2<br>OS=Mus musculus<br>GN=Slc24a2 PE=2<br>SV=1 -<br>[Q14B11_MOUSE]                                                                    | 15.47 | 1  | 3  | 7  | 27  | 0.91 | 1.22 | 1.32 | 1.09 | 1.20 | 0.92 | 1.02 | 0.98 | 1.08 | 0.95 | 1.02 | 0.89 | 1.06 | 78.93  | 6.20  |
| Q5U405 | Transmembrane<br>protease serine 13<br>OS=Mus musculus<br>GN=Tmprs13 PE=2<br>SV=2 -<br>[TMPSD_MOUSE]                                                 | 1.47  | 2  | 1  | 1  | 9   | 2.00 | 0.64 | 0.33 | 1.02 | 0.48 | 1.10 | 0.58 | 0.98 | 0.51 | 0.78 | 0.41 | 1.05 | 0.52 | 59.77  | 9.01  |
| A2A839 | Protein 4.1 OS=Mus<br>musculus GN=Epb4.1<br>PE=2 SV=1 -<br>[A2A839_MOUSE]                                                                            | 16.28 | 10 | 4  | 7  | 15  | 0.89 | 0.96 | 0.99 | 0.95 | 1.20 | 0.95 | 1.07 | 0.98 | 1.10 | 1.04 | 1.25 | 0.94 | 1.03 | 72.38  | 6.62  |
| Q8R1F1 | Niban-like protein 1<br>OS=Mus musculus<br>GN=Fam129b PE=1<br>SV=2 -<br>[NIBL1_MOUSE]                                                                | 1.47  | 1  | 1  | 1  | 2   | 1.00 | 1.33 | 1.32 | 1.20 | 1.20 | 0.88 | 0.88 | 0.98 | 0.97 | 0.99 | 0.99 | 1.22 | 1.22 | 84.76  | 5.94  |
| E9PXB0 | Calcium-independent<br>phospholipase A2-<br>gamma OS=Mus<br>musculus GN=Pnp1a8<br>PE=2 SV=1 -<br>[E9PXB0_MOUSE]                                      | 22.04 | 4  | 10 | 10 | 17  | 0.97 | 0.99 | 1.09 | 1.01 | 1.01 | 1.01 | 1.01 | 0.98 | 0.98 | 0.94 | 0.94 | 0.94 | 0.95 | 62.31  | 7.84  |
| Q3UVX5 | Metabotropic<br>glutamate receptor 5<br>OS=Mus musculus<br>GN=Grm5 PE=2 SV=2<br>- [GRM5_MOUSE]                                                       | 21.86 | 5  | 22 | 22 | 52  | 1.08 | 1.16 | 1.08 | 1.15 | 1.07 | 0.99 | 0.91 | 0.98 | 0.91 | 1.02 | 0.96 | 1.07 | 1.00 | 131.78 | 7.84  |

|          |                                                                                                              |       |   |    |    |    |      |      |      |      |      |      |      |      |      |      |      |      |      |       |      |
|----------|--------------------------------------------------------------------------------------------------------------|-------|---|----|----|----|------|------|------|------|------|------|------|------|------|------|------|------|------|-------|------|
| Q8C863-2 | Isoform 2 of E3 ubiquitin-protein ligase Itchy OS=Mus musculus GN=Itch - [ITCH_MOUSE]                        | 3.43  | 2 | 2  | 2  | 3  | 0.94 | 1.06 | 1.12 | 1.06 | 1.12 | 0.91 | 0.96 | 0.98 | 1.03 | 0.94 | 1.00 | 1.08 | 1.15 | 86.65 | 6.34 |
| Q05BC3-2 | Isoform 2 of Echinoderm microtubule-associated protein-like 1 OS=Mus musculus GN=Eml1 - [EMAL1_MOUSE]        | 9.96  | 5 | 8  | 8  | 16 | 0.95 | 0.96 | 1.05 | 0.95 | 1.04 | 0.96 | 1.02 | 0.98 | 1.04 | 0.86 | 0.99 | 0.85 | 0.91 | 86.36 | 7.46 |
| O88848   | ADP-ribosylation factor-like protein 6 OS=Mus musculus GN=Arl6 PE=2 SV=1 - [ARL6_MOUSE]                      | 11.83 | 3 | 2  | 2  | 2  | 1.05 | 0.82 | 0.77 | 1.09 | 1.04 | 1.05 | 0.99 | 0.98 | 0.93 | 0.86 | 0.82 | 0.74 | 0.70 | 20.95 | 8.25 |
| D5MCW4   | Protein CutA OS=Mus musculus GN=Cuta PE=2 SV=1 - [D5MCW4_MOUSE]                                              | 9.09  | 2 | 1  | 1  | 1  | 0.65 | 0.84 | 1.28 | 0.88 | 1.36 | 1.05 | 1.61 | 0.98 | 1.50 | 0.86 | 1.33 | 0.98 | 1.51 | 16.44 | 6.29 |
| Q99J31   | Oligophrenin-1 OS=Mus musculus GN=Ophn1 PE=2 SV=1 - [OPHN1_MOUSE]                                            | 6.61  | 3 | 3  | 3  | 12 | 1.01 | 1.02 | 1.00 | 1.00 | 1.02 | 0.98 | 0.91 | 0.98 | 1.05 | 1.03 | 0.91 | 1.04 | 0.94 | 91.93 | 7.96 |
| Q3U5Q7   | UMP-CMP kinase 2, mitochondrial OS=Mus musculus GN=Cmpk2 PE=2 SV=2 - [CMPK2_MOUSE]                           | 19.46 | 1 | 7  | 7  | 10 | 1.01 | 1.09 | 1.12 | 1.03 | 1.07 | 0.97 | 0.93 | 0.98 | 0.95 | 1.02 | 0.97 | 1.13 | 1.14 | 50.00 | 7.27 |
| Q61025-2 | Isoform 2 of Intraflagellar transport protein 20 homolog OS=Mus musculus GN=Ifi20 - [IFT20_MOUSE]            | 27.36 | 2 | 2  | 2  | 4  | 0.95 | 1.29 | 1.35 | 0.80 | 0.77 | 1.04 | 1.21 | 0.98 | 1.08 | 1.03 | 1.08 | 0.78 | 0.83 | 12.01 | 5.60 |
| F7DBY2   | Merlin (Fragment) OS=Mus musculus GN=Nf2 PE=2 SV=1 - [F7DBY2_MOUSE]                                          | 7.86  | 5 | 1  | 1  | 2  | 0.91 | 0.80 | 0.88 | 0.97 | 1.06 | 0.96 | 1.04 | 0.98 | 1.07 | 1.02 | 1.12 | 1.01 | 1.11 | 16.03 | 9.58 |
| Q3UVL4   | Vacuolar protein sorting-associated protein 51 homolog OS=Mus musculus GN=Vps51 PE=2 SV=2 - [VP551_MOUSE]    | 21.61 | 4 | 9  | 9  | 21 | 0.90 | 1.17 | 1.32 | 1.20 | 1.36 | 0.90 | 1.02 | 0.98 | 1.05 | 1.10 | 1.21 | 1.07 | 1.20 | 86.13 | 6.24 |
| Q8C612   | Succinate dehydrogenase assembly factor 2, mitochondrial OS=Mus musculus GN=Sdhaf2 PE=2 SV=1 - [SDHF2_MOUSE] | 20.12 | 3 | 3  | 3  | 8  | 1.00 | 0.62 | 0.61 | 0.86 | 0.88 | 1.02 | 1.03 | 0.98 | 0.99 | 0.65 | 0.87 | 0.81 | 0.79 | 19.42 | 6.35 |
| H3BL92   | Protein Evi51 OS=Mus musculus GN=Evi51 PE=2 SV=1 - [H3BL92_MOUSE]                                            | 9.85  | 5 | 6  | 6  | 11 | 0.95 | 1.08 | 1.16 | 1.08 | 1.15 | 0.99 | 1.02 | 0.98 | 1.04 | 1.05 | 1.06 | 1.00 | 1.05 | 92.28 | 5.27 |
| Q07076   | Annexin A7 OS=Mus musculus GN=Anxa7 PE=2 SV=2 - [ANXA7_MOUSE]                                                | 22.68 | 1 | 10 | 10 | 24 | 1.04 | 1.05 | 1.07 | 1.12 | 1.11 | 0.98 | 0.93 | 0.98 | 0.96 | 1.00 | 0.98 | 1.09 | 1.10 | 49.89 | 6.18 |

|        |                                                                                                                     |       |   |   |    |      |      |      |      |      |      |      |      |      |      |      |      |      |      |        |       |
|--------|---------------------------------------------------------------------------------------------------------------------|-------|---|---|----|------|------|------|------|------|------|------|------|------|------|------|------|------|------|--------|-------|
| P39087 | Glutamate receptor ionotropic, kainate 2<br>OS=Mus musculus<br>GN=Crik2 PE=1 SV=4<br>-[GRIK2_MOUSE]                 | 5.51  | 8 | 3 | 4  | 5    | 1.03 | 1.02 | 1.09 | 1.16 | 1.27 | 0.81 | 0.99 | 0.98 | 0.90 | 0.97 | 1.01 | 0.99 | 0.96 | 102.42 | 7.77  |
| Q9JH17 | Exosome complex component RRP45<br>OS=Mus musculus<br>GN=Exose9 PE=2<br>SV=1 -<br>[EXOS9_MOUSE]                     | 3.20  | 1 | 1 | 1  | 2    | 0.99 | 1.21 | 1.22 | 0.93 | 0.95 | 1.02 | 1.03 | 0.98 | 0.99 | 0.90 | 0.92 | 0.95 | 0.96 | 48.91  | 5.11  |
| O35593 | 26S proteasome non-ATPase regulatory subunit 14<br>OS=Mus musculus<br>GN=Psm14 PE=1 SV=2 -<br>[PSDE_MOUSE]          | 11.29 | 1 | 2 | 2  | 4    | 0.91 | 0.90 | 0.87 | 0.77 | 1.09 | 1.22 | 1.18 | 0.98 | 0.95 | 1.03 | 1.10 | 1.02 | 0.99 | 34.55  | 6.52  |
| D3Z118 | Islet cell autoantigen 1<br>OS=Mus musculus<br>GN=Ica1 PE=2 SV=1 -<br>[D3Z118_MOUSE]                                | 13.76 | 8 | 6 | 6  | 14   | 0.98 | 0.99 | 0.96 | 1.05 | 1.10 | 0.93 | 0.97 | 0.98 | 1.03 | 1.06 | 1.03 | 1.02 | 1.02 | 52.90  | 6.20  |
| Q61923 | Potassium voltage-gated channel subfamily A member 6<br>OS=Mus musculus<br>GN=Kcna6 PE=1<br>SV=1 -<br>[KCNA6_MOUSE] | 17.20 | 1 | 5 | 6  | 24   | 1.38 | 1.08 | 1.00 | 1.15 | 0.89 | 0.88 | 0.68 | 0.98 | 0.85 | 1.00 | 0.82 | 1.04 | 0.94 | 58.64  | 5.03  |
| Q8BIJ7 | RUN and FYVE domain-containing protein 1<br>OS=Mus musculus<br>GN=Rufy1 PE=1 SV=1 -<br>[RUFY1_MOUSE]                | 5.48  | 2 | 3 | 4  | 11   | 0.99 | 1.11 | 1.12 | 1.02 | 1.03 | 1.00 | 1.00 | 0.98 | 1.01 | 1.01 | 1.04 | 1.01 | 1.04 | 80.33  | 5.68  |
| Q9JJZ2 | Tubulin alpha-8 chain<br>OS=Mus musculus<br>GN=Tuba8 PE=1<br>SV=1 -<br>[TBA8_MOUSE]                                 | 45.21 | 1 | 4 | 22 | 2144 | 0.91 | 1.03 | 1.07 | 0.96 | 1.02 | 0.87 | 1.06 | 0.98 | 1.03 | 0.90 | 0.99 | 0.91 | 0.99 | 50.02  | 5.10  |
| Q8K1S1 | Leucine-rich repeat LGI family member 4<br>OS=Mus musculus<br>GN=Lgi4 PE=1 SV=1 -<br>[LGI4_MOUSE]                   | 4.10  | 1 | 2 | 2  | 2    | 1.07 | 1.10 | 1.03 | 1.19 | 1.11 | 0.99 | 0.92 | 0.98 | 0.91 | 1.10 | 1.03 | 1.05 | 0.98 | 59.34  | 7.78  |
| Q8VDU5 | SNF-related serine/threonine-protein kinase<br>OS=Mus musculus<br>GN=Snrk PE=1 SV=1 -<br>[SNRK_MOUSE]               | 6.55  | 2 | 4 | 4  | 4    | 0.98 | 1.14 | 1.10 | 1.06 | 1.01 | 1.14 | 1.18 | 0.98 | 1.00 | 1.10 | 1.12 | 1.03 | 1.21 | 81.86  | 7.49  |
| Q8VEH5 | EPM2A-interacting protein 1<br>OS=Mus musculus<br>GN=Epm2aip1 PE=2<br>SV=1 -<br>[EPMIP_MOUSE]                       | 20.79 | 1 | 9 | 9  | 16   | 1.10 | 1.13 | 1.07 | 1.09 | 1.08 | 0.92 | 0.90 | 0.98 | 0.98 | 1.12 | 1.02 | 1.10 | 1.13 | 70.05  | 5.87  |
| D3Z2K2 | 28S ribosomal protein S14, mitochondrial<br>OS=Mus musculus<br>GN=Mrps14 PE=2<br>SV=1 -<br>[D3Z2K2_MOUSE]           | 12.30 | 2 | 1 | 1  | 2    | 0.89 | 0.97 | 1.08 | 0.94 | 1.06 | 1.18 | 1.32 | 0.98 | 1.10 | 0.92 | 1.03 | 0.79 | 0.89 | 14.27  | 10.86 |

|         |                                                                                                              |       |    |    |    |     |      |      |      |      |      |      |      |      |      |      |      |      |      |        |      |
|---------|--------------------------------------------------------------------------------------------------------------|-------|----|----|----|-----|------|------|------|------|------|------|------|------|------|------|------|------|------|--------|------|
| Q8K2K6- | Isoform 3 of Arf-GAP domain and FG repeat-containing protein 1 OS=Mus musculus GN=Agfg1 - [AGFG1_MOUSE]      | 23.77 | 6  | 10 | 12 | 52  | 0.97 | 0.83 | 0.83 | 0.95 | 1.00 | 0.96 | 0.98 | 0.98 | 1.02 | 0.90 | 0.93 | 0.86 | 0.87 | 55.03  | 8.47 |
| H3BJY0  | Calcium-transporting ATPase type 2C member 1 (Fragment) OS=Mus musculus GN=Atp2c1 PE=2 SV=1 - [H3BJY0_MOUSE] | 24.68 | 12 | 4  | 4  | 13  | 1.00 | 1.05 | 1.06 | 1.14 | 1.19 | 0.91 | 0.94 | 0.98 | 1.01 | 1.01 | 1.03 | 1.06 | 1.03 | 25.36  | 5.49 |
| Q8CFI7  | DNA-directed RNA polymerase II subunit RPB2 OS=Mus musculus GN=Polr2b PE=2 SV=2 - [RPB2_MOUSE]               | 4.94  | 1  | 4  | 4  | 7   | 1.02 | 1.11 | 1.13 | 1.03 | 1.08 | 0.85 | 0.89 | 0.98 | 0.94 | 0.86 | 0.91 | 0.88 | 0.87 | 133.82 | 6.87 |
| Q68FF6  | ARF GTPase-activating protein GIT1 OS=Mus musculus GN=Git1 PE=1 SV=1 - [GIT1_MOUSE]                          | 36.75 | 14 | 18 | 18 | 48  | 0.92 | 1.18 | 1.29 | 1.08 | 1.15 | 0.93 | 1.02 | 0.98 | 1.01 | 1.06 | 1.16 | 1.09 | 1.15 | 85.25  | 6.93 |
| Q9D1K2  | V-type proton ATPase subunit F OS=Mus musculus GN=Atp6v1f PE=1 SV=2 - [VATF_MOUSE]                           | 82.35 | 2  | 9  | 9  | 108 | 0.97 | 0.84 | 0.91 | 0.88 | 0.92 | 0.91 | 0.96 | 0.98 | 1.02 | 0.85 | 0.91 | 0.82 | 0.87 | 13.36  | 5.82 |
| P0C027  | Diphosphoinositol polyphosphate phosphohydrolase 3-alpha OS=Mus musculus GN=Nudt10 PE=1 SV=1 - [NUD10_MOUSE] | 39.02 | 1  | 2  | 5  | 14  | 0.90 | 1.05 | 1.09 | 0.93 | 0.87 | 1.03 | 1.06 | 0.98 | 1.08 | 1.00 | 1.03 | 1.04 | 1.10 | 18.58  | 5.69 |
| A2A108  | Taperin OS=Mus musculus GN=Tpm PE=1 SV=1 - [TPRN_MOUSE]                                                      | 2.40  | 1  | 1  | 1  | 2   | 1.30 | 1.38 | 1.06 | 1.09 | 0.84 | 1.34 | 1.03 | 0.98 | 0.75 | 1.58 | 1.22 | 1.35 | 1.04 | 80.04  | 7.09 |
| H3BJR6  | Sodium channel subunit beta-3 OS=Mus musculus GN=Scn3b PE=2 SV=1 - [H3BJR6_MOUSE]                            | 11.43 | 4  | 2  | 2  | 5   | 1.10 | 0.98 | 0.85 | 1.13 | 0.92 | 1.04 | 0.94 | 0.98 | 0.84 | 1.06 | 0.89 | 1.14 | 0.97 | 20.35  | 4.75 |
| A6H5Z3  | Exocyst complex component 6B OS=Mus musculus GN=Exoc6b PE=2 SV=1 - [EXC6B_MOUSE]                             | 6.79  | 4  | 4  | 4  | 7   | 0.96 | 0.98 | 1.00 | 1.14 | 1.19 | 0.93 | 0.88 | 0.98 | 1.02 | 1.07 | 1.02 | 1.03 | 1.00 | 94.07  | 6.39 |
| Q8C4Q6  | Axin interactor, dorsalization-associated protein OS=Mus musculus GN=Aida PE=1 SV=1 - [AIDA_MOUSE]           | 9.84  | 2  | 2  | 2  | 6   | 1.07 | 1.22 | 1.14 | 1.17 | 1.04 | 1.38 | 1.22 | 0.98 | 1.01 | 1.26 | 1.12 | 1.36 | 1.21 | 34.87  | 6.74 |
| Q3YAB1  | Kv channel-interacting protein 2 OS=Mus musculus GN=Kcnp2 PE=2 SV=1 - [Q3YAB1_MOUSE]                         | 20.45 | 12 | 4  | 4  | 9   | 1.02 | 1.35 | 1.39 | 0.91 | 0.90 | 1.01 | 1.15 | 0.98 | 1.08 | 1.00 | 0.99 | 1.06 | 1.21 | 25.63  | 4.61 |
| P84084  | ADP-ribosylation factor 5 OS=Mus musculus GN=Arf5 PE=2 SV=2 - [ARF5_MOUSE]                                   | 60.56 | 3  | 3  | 9  | 51  | 1.05 | 1.04 | 1.02 | 1.03 | 1.00 | 1.00 | 0.98 | 0.98 | 0.94 | 0.96 | 0.91 | 0.97 | 0.92 | 20.52  | 6.79 |

|          |                                                                                                       |       |    |     |     |     |      |      |      |      |      |      |      |      |      |      |      |      |      |        |      |
|----------|-------------------------------------------------------------------------------------------------------|-------|----|-----|-----|-----|------|------|------|------|------|------|------|------|------|------|------|------|------|--------|------|
| Q80Z38   | SH3 and multiple ankyrin repeat domains protein 2 OS=Mus musculus GN=Shank2 PE=1 SV=2 - [SHAN2_MOUSE] | 44.72 | 3  | 4   | 46  | 259 | 1.03 | 1.00 | 0.89 | 0.93 | 0.94 | 1.05 | 0.92 | 0.98 | 1.03 | 0.92 | 0.93 | 0.97 | 0.89 | 158.87 | 7.18 |
| Q63844   | Mitogen-activated protein kinase 3 OS=Mus musculus GN=Mapk3 PE=1 SV=5 - [MK03_MOUSE]                  | 38.42 | 19 | 9   | 14  | 37  | 1.07 | 1.08 | 1.03 | 1.00 | 0.95 | 0.94 | 0.96 | 0.98 | 0.89 | 1.03 | 0.95 | 1.11 | 1.11 | 43.04  | 6.61 |
| P97492   | Regulator of G-protein signaling 14 OS=Mus musculus GN=Rgs14 PE=1 SV=2 - [RGS14_MOUSE]                | 26.14 | 1  | 10  | 10  | 19  | 1.01 | 1.12 | 1.09 | 1.07 | 0.97 | 1.03 | 1.02 | 0.98 | 0.89 | 1.09 | 1.02 | 1.14 | 1.05 | 59.81  | 7.43 |
| A2AKG8   | Isoform 2 of Focadhesin OS=Mus musculus GN=Focad - [FOCAD_MOUSE]                                      | 2.69  | 3  | 1   | 1   | 1   | 1.12 | 1.24 | 1.10 | 1.03 | 0.92 | 1.01 | 0.89 | 0.98 | 0.87 | 0.99 | 0.88 | 1.17 | 1.04 | 37.62  | 5.97 |
| Q921F4   | Heterogeneous nuclear ribonucleoprotein L-like OS=Mus musculus GN=Hnrnpl PE=1 SV=3 - [HNRL_MOUSE]     | 34.01 | 2  | 12  | 12  | 22  | 1.02 | 0.92 | 0.90 | 1.10 | 0.99 | 0.90 | 0.86 | 0.98 | 1.00 | 0.96 | 0.98 | 0.97 | 0.97 | 64.08  | 5.85 |
| O08677-2 | Isoform LMW of Kininogen-1 OS=Mus musculus GN=Kng1 - [KNG1_MOUSE]                                     | 9.72  | 7  | 4   | 4   | 8   | 0.89 | 0.78 | 0.80 | 0.47 | 0.53 | 1.02 | 1.14 | 0.98 | 1.02 | 1.11 | 1.17 | 0.64 | 0.66 | 47.87  | 6.09 |
| P28828   | Receptor-type tyrosine-protein phosphatase mu OS=Mus musculus GN=Ptpm PE=2 SV=2 - [PTPRM_MOUSE]       | 4.13  | 1  | 2   | 3   | 4   | 0.77 | 1.10 | 1.44 | 0.86 | 1.12 | 0.82 | 1.06 | 0.98 | 1.27 | 0.91 | 1.19 | 0.81 | 1.06 | 163.55 | 6.68 |
| G3X8Q6   | Kinesin family member C2 OS=Mus musculus GN=Kifc2 PE=3 SV=1 - [G3X8Q6_MOUSE]                          | 2.02  | 2  | 1   | 1   | 4   | 1.04 | 1.28 | 1.23 | 1.05 | 1.01 | 1.11 | 1.06 | 0.98 | 0.94 | 0.98 | 0.95 | 1.21 | 1.17 | 85.55  | 6.16 |
| Q9D4H8   | Isoform 2 of Cullin-2 OS=Mus musculus GN=Cul2 - [CUL2_MOUSE]                                          | 3.68  | 3  | 2   | 2   | 3   | 1.06 | 1.24 | 1.17 | 1.26 | 1.19 | 1.01 | 0.95 | 0.98 | 0.92 | 1.19 | 1.13 | 1.12 | 1.06 | 82.22  | 6.80 |
| Q9QXS1   | Isoform PLEC-0.1C of Plectin OS=Mus musculus GN=Plec - [PLEC_MOUSE]                                   | 43.15 | 30 | 162 | 164 | 392 | 0.93 | 1.06 | 1.12 | 1.11 | 1.17 | 0.97 | 1.04 | 0.98 | 1.06 | 0.97 | 1.04 | 0.98 | 1.05 | 519.47 | 5.76 |
| Q8BK72   | 28S ribosomal protein S27, mitochondrial OS=Mus musculus GN=Mrps27 PE=2 SV=2 - [RT27_MOUSE]           | 13.01 | 1  | 4   | 4   | 7   | 0.97 | 0.88 | 0.88 | 1.14 | 1.14 | 1.00 | 1.04 | 0.98 | 0.98 | 1.00 | 1.00 | 0.96 | 0.96 | 47.75  | 5.50 |
| Q78PY7   | Staphylococcal nuclease domain-containing protein 1 OS=Mus musculus GN=Snd1 PE=1 SV=1 - [SND1_MOUSE]  | 31.21 | 3  | 22  | 22  | 47  | 1.00 | 1.08 | 1.08 | 1.03 | 1.00 | 0.94 | 0.96 | 0.98 | 0.94 | 0.99 | 1.00 | 1.09 | 1.06 | 102.02 | 7.43 |

|          |                                                                                                                                       |       |    |    |    |     |      |      |      |      |      |      |      |      |      |      |      |      |      |        |       |
|----------|---------------------------------------------------------------------------------------------------------------------------------------|-------|----|----|----|-----|------|------|------|------|------|------|------|------|------|------|------|------|------|--------|-------|
| Q9CQU3   | Protein RER1 OS=Mus musculus GN=Rer1 PE=1 SV=1 - [RER1_MOUSE]                                                                         | 5.10  | 1  | 1  | 1  | 1   | 0.91 | 1.27 | 1.40 | 1.11 | 1.22 | 0.88 | 0.96 | 0.98 | 1.08 | 0.93 | 1.03 | 0.86 | 0.95 | 22.97  | 9.51  |
| P62301   | 40S ribosomal protein S13 OS=Mus musculus GN=Rps13 PE=1 SV=2 - [RS13_MOUSE]                                                           | 28.48 | 1  | 4  | 4  | 16  | 1.00 | 0.88 | 0.84 | 1.05 | 1.04 | 1.09 | 1.06 | 0.98 | 1.00 | 1.01 | 0.98 | 1.03 | 0.99 | 17.21  | 10.54 |
| E9QMJ1   | Arf-GAP with SH3 domain, ANK repeat and PH domain-containing protein 1 OS=Mus musculus GN=Asap1 PE=2 SV=1 - [E9QMJ1_MOUSE]            | 22.21 | 13 | 17 | 18 | 47  | 0.96 | 0.96 | 1.02 | 0.99 | 1.06 | 0.97 | 1.01 | 0.98 | 1.07 | 0.89 | 0.98 | 0.93 | 1.00 | 123.46 | 7.06  |
| P12023-2 | Isoform APP695 of Amyloid beta A4 protein OS=Mus musculus GN=App - [A4_MOUSE]                                                         | 36.55 | 1  | 1  | 20 | 201 | 0.90 | 0.78 | 0.87 | 0.90 | 1.01 | 1.03 | 1.14 | 0.98 | 1.09 | 0.88 | 0.98 | 0.76 | 0.84 | 78.39  | 4.83  |
| Q61414   | Keratin, type I cytoskeletal 15 OS=Mus musculus GN=Krt15 PE=1 SV=2 - [K1C15_MOUSE]                                                    | 7.08  | 17 | 1  | 4  | 5   | 1.59 | 0.80 | 0.50 | 2.48 | 1.55 | 1.33 | 0.83 | 0.98 | 0.61 | 1.19 | 0.75 | 1.80 | 1.13 | 49.11  | 4.86  |
| Q8K5B2   | Multiple coagulation factor deficiency protein 2 homolog OS=Mus musculus GN=Mcf2 PE=2 SV=1 - [MCFD2_MOUSE]                            | 52.41 | 3  | 4  | 4  | 12  | 1.03 | 0.74 | 0.74 | 0.91 | 0.87 | 1.04 | 0.98 | 0.98 | 0.88 | 1.04 | 0.88 | 0.94 | 0.92 | 16.16  | 4.72  |
| O88502   | High affinity cAMP-specific and IBMX-insensitive 3',5'-cyclic phosphodiesterase 8A OS=Mus musculus GN=Pde8a PE=1 SV=1 - [PDE8A_MOUSE] | 5.71  | 1  | 2  | 3  | 6   | 1.38 | 1.78 | 1.29 | 1.13 | 0.82 | 1.08 | 0.78 | 0.98 | 0.71 | 0.99 | 0.72 | 1.17 | 0.85 | 93.11  | 5.85  |
| F8WIK5   | Pleckstrin homology domain-containing family A member 2 (Fragment) OS=Mus musculus GN=Plekha2 PE=2 SV=1 - [F8WIK5_MOUSE]              | 6.53  | 2  | 1  | 1  | 1   | 0.68 | 1.48 | 2.18 | 0.86 | 1.27 | 0.79 | 1.16 | 0.98 | 1.45 | 1.15 | 1.71 | 0.78 | 1.15 | 37.61  | 8.95  |
| Q8CF96   | Synaptotagmin VIIbeta OS=Mus musculus GN=Syn7 PE=2 SV=1 - [Q8CF96_MOUSE]                                                              | 33.33 | 2  | 2  | 13 | 36  | 1.27 | 0.94 | 0.74 | 0.89 | 0.84 | 1.22 | 0.93 | 0.98 | 0.74 | 1.22 | 0.83 | 1.23 | 0.81 | 50.64  | 9.11  |
| Q9R1T2   | SUMO-activating enzyme subunit 1 OS=Mus musculus GN=Sae1 PE=2 SV=1 - [SAE1_MOUSE]                                                     | 40.86 | 2  | 11 | 11 | 20  | 1.02 | 0.97 | 0.95 | 1.14 | 1.03 | 1.04 | 1.00 | 0.98 | 0.97 | 0.98 | 0.95 | 1.04 | 0.99 | 38.60  | 5.36  |
| A2AKX2   | Netrin-G2 OS=Mus musculus GN=Ntng2 PE=2 SV=1 - [A2AKX2_MOUSE]                                                                         | 13.95 | 5  | 4  | 4  | 7   | 0.83 | 0.89 | 1.15 | 1.03 | 1.27 | 0.90 | 1.25 | 0.98 | 1.15 | 0.94 | 0.96 | 0.94 | 1.15 | 49.05  | 7.88  |

|          |                                                                                                                        |       |    |    |    |     |      |      |      |      |      |      |      |      |      |      |      |      |      |        |      |
|----------|------------------------------------------------------------------------------------------------------------------------|-------|----|----|----|-----|------|------|------|------|------|------|------|------|------|------|------|------|------|--------|------|
| Q99K95   | Protein RTF2 homolog<br>OS=Mus musculus<br>GN=Rtfd1 PE=2<br>SV=1 -<br>[RTF2_MOUSE]                                     | 8.79  | 1  | 3  | 3  | 11  | 1.02 | 0.76 | 0.75 | 1.01 | 0.95 | 1.02 | 1.04 | 0.98 | 0.98 | 0.90 | 0.85 | 0.80 | 0.82 | 33.91  | 8.81 |
| P60335   | Poly(rC)-binding<br>protein 1 OS=Mus<br>musculus GN=Pcbp1<br>PE=1 SV=1 -<br>[PCBP1_MOUSE]                              | 68.26 | 2  | 11 | 16 | 53  | 0.99 | 1.01 | 1.00 | 1.03 | 1.02 | 1.02 | 0.98 | 0.98 | 0.95 | 0.97 | 0.99 | 1.08 | 1.06 | 37.47  | 7.09 |
| Q7TQI3   | Ubiquitin thioesterase<br>OTUB1 OS=Mus<br>musculus GN=Otub1<br>PE=1 SV=2 -<br>[OTUB1_MOUSE]                            | 48.71 | 3  | 9  | 9  | 53  | 1.04 | 1.07 | 1.05 | 1.02 | 1.02 | 1.00 | 0.99 | 0.98 | 0.93 | 1.00 | 0.96 | 1.06 | 1.05 | 31.25  | 4.94 |
| Q9DCB4   | Isoform 2 of cAMP-<br>regulated<br>phosphoprotein 21<br>OS=Mus musculus<br>GN=Arpp21 -<br>[ARPP21_MOUSE]               | 50.00 | 4  | 1  | 4  | 38  | 1.16 | 1.30 | 1.12 | 0.88 | 0.76 | 1.07 | 0.92 | 0.98 | 0.85 | 1.00 | 0.87 | 1.27 | 1.10 | 9.53   | 4.92 |
| Q5U4F6   | WD repeat-containing<br>protein 34 OS=Mus<br>musculus GN=Wdr34<br>PE=2 SV=2 -<br>[WDR34_MOUSE]                         | 9.35  | 2  | 3  | 3  | 5   | 1.06 | 1.33 | 1.26 | 1.09 | 1.02 | 0.87 | 0.82 | 0.98 | 0.92 | 1.05 | 0.99 | 1.15 | 1.08 | 57.94  | 6.52 |
| Q61990-3 | Isoform 3 of Poly(rC)-<br>binding protein 2<br>OS=Mus musculus<br>GN=Pcbp2 -<br>[PCBP2_MOUSE]                          | 50.43 | 4  | 7  | 13 | 48  | 1.01 | 0.94 | 0.90 | 0.92 | 1.00 | 0.96 | 1.01 | 0.98 | 0.97 | 0.98 | 0.98 | 1.01 | 1.03 | 36.78  | 7.06 |
| F6RJV6   | LanC-like protein 2<br>(Fragment) OS=Mus<br>musculus GN=Lanc12<br>PE=2 SV=1 -<br>[F6RJV6_MOUSE]                        | 41.50 | 2  | 14 | 14 | 49  | 1.05 | 1.03 | 1.01 | 1.05 | 1.04 | 0.97 | 0.93 | 0.98 | 0.88 | 0.99 | 0.92 | 1.13 | 0.97 | 49.71  | 7.14 |
| Q9CZJ2   | Heat shock 70 kDa<br>protein 12B OS=Mus<br>musculus<br>GN=Hspa12b PE=1<br>SV=1 -<br>[HS12B_MOUSE]                      | 11.53 | 1  | 4  | 8  | 21  | 0.95 | 1.22 | 1.26 | 1.13 | 1.19 | 0.86 | 0.90 | 0.98 | 0.96 | 0.93 | 0.98 | 1.10 | 1.16 | 76.07  | 8.47 |
| Q8QZY1   | Eukaryotic translation<br>initiation factor 3<br>subunit L OS=Mus<br>musculus GN=EIF3L<br>PE=1 SV=1 -<br>[EIF3L_MOUSE] | 23.58 | 1  | 10 | 10 | 21  | 1.08 | 1.11 | 1.03 | 1.15 | 1.03 | 1.01 | 0.88 | 0.98 | 0.90 | 0.97 | 0.85 | 1.04 | 1.00 | 66.57  | 6.44 |
| Q8K0V4   | CCR4-NOT<br>transcription complex<br>subunit 3 OS=Mus<br>musculus GN=Cnot3<br>PE=1 SV=1 -<br>[CNOT3_MOUSE]             | 8.52  | 2  | 5  | 5  | 14  | 0.91 | 0.91 | 1.03 | 0.91 | 0.98 | 1.01 | 1.16 | 0.98 | 1.10 | 0.97 | 1.09 | 0.98 | 1.02 | 81.90  | 6.20 |
| Q8C8R3-7 | Isoform 7 of Ankyrin-2<br>OS=Mus musculus<br>GN=Ank2 -<br>[ANK2_MOUSE]                                                 | 48.68 | 2  | 2  | 16 | 118 | 1.31 | 0.94 | 0.70 | 1.05 | 0.81 | 1.12 | 0.83 | 0.98 | 0.71 | 0.92 | 0.66 | 1.08 | 0.79 | 49.51  | 9.48 |
| E9Q9E1   | Eukaryotic translation<br>initiation factor 4<br>gamma 1 OS=Mus<br>musculus GN=EIF4g1<br>PE=2 SV=1 -<br>[E9Q9E1_MOUSE] | 16.70 | 11 | 16 | 19 | 51  | 1.02 | 0.85 | 0.92 | 1.01 | 1.02 | 1.02 | 1.05 | 0.98 | 0.92 | 1.02 | 1.03 | 0.97 | 1.08 | 175.22 | 5.38 |



|        |                                                                                                                              |       |   |    |    |    |      |      |      |      |      |      |      |      |      |      |      |      |      |       |      |
|--------|------------------------------------------------------------------------------------------------------------------------------|-------|---|----|----|----|------|------|------|------|------|------|------|------|------|------|------|------|------|-------|------|
| Q9D1C3 | Protein preY,<br>mitochondrial OS=Mus<br>musculus GN=Pyurf<br>PE=3 SV=1 -<br>[PREY_MOUSE]                                    | 18.75 | 1 | 1  | 1  | 4  | 1.05 | 0.89 | 0.84 | 0.99 | 0.94 | 0.94 | 0.90 | 0.98 | 0.94 | 0.85 | 0.81 | 0.93 | 0.89 | 12.50 | 8.34 |
| Q91WE1 | Sorting nexin-15<br>OS=Mus musculus<br>GN=Snx15 PE=2<br>SV=1 -<br>[SNX15_MOUSE]                                              | 35.61 | 3 | 6  | 6  | 12 | 0.94 | 0.71 | 0.91 | 0.80 | 0.90 | 1.12 | 1.14 | 0.98 | 1.00 | 1.07 | 1.05 | 0.91 | 0.98 | 37.72 | 5.24 |
| Q9CYA6 | Zinc finger CCHC<br>domain-containing<br>protein 8 OS=Mus<br>musculus GN=Zchc8<br>PE=2 SV=3 -<br>[ZCHC8_MOUSE]               | 22.71 | 1 | 8  | 8  | 10 | 0.85 | 0.88 | 1.03 | 0.87 | 1.04 | 1.02 | 1.30 | 0.98 | 1.21 | 1.00 | 1.17 | 1.03 | 1.23 | 77.98 | 4.73 |
| Q9R118 | Serine protease<br>HTRA1 OS=Mus<br>musculus GN=Htra1<br>PE=1 SV=2 -<br>[HTRA1_MOUSE]                                         | 10.42 | 1 | 4  | 4  | 8  | 0.97 | 1.31 | 1.29 | 0.85 | 0.82 | 0.96 | 0.95 | 0.98 | 0.96 | 0.85 | 0.90 | 0.88 | 0.84 | 51.18 | 7.65 |
| Q61771 | Kinesin-like protein<br>KIF3B OS=Mus<br>musculus GN=Kif3b<br>PE=1 SV=1 -<br>[KIF3B_MOUSE]                                    | 21.69 | 1 | 9  | 13 | 26 | 1.00 | 0.99 | 0.94 | 0.93 | 0.94 | 1.05 | 1.04 | 0.98 | 1.02 | 0.86 | 1.00 | 1.01 | 1.00 | 85.24 | 7.69 |
| E9PXC9 | Vacuolar protein<br>sorting-associated<br>protein 53 homolog<br>OS=Mus musculus<br>GN=Vps53 PE=2<br>SV=1 -<br>[E9PXC9_MOUSE] | 5.73  | 6 | 3  | 3  | 4  | 0.87 | 1.07 | 1.01 | 1.07 | 1.23 | 0.94 | 1.14 | 0.98 | 0.93 | 1.01 | 0.91 | 1.12 | 0.93 | 91.06 | 6.61 |
| Q3UFT3 | GRB2-associated and<br>regulator of MAPK<br>protein OS=Mus<br>musculus GN=Garem<br>PE=1 SV=2 -<br>[GAREM_MOUSE]              | 4.91  | 1 | 3  | 3  | 5  | 0.94 | 1.53 | 1.54 | 1.13 | 1.13 | 1.11 | 1.20 | 0.98 | 1.04 | 0.95 | 1.02 | 0.96 | 1.15 | 97.19 | 6.60 |
| P10605 | Cathepsin B OS=Mus<br>musculus GN=Ctsb<br>PE=1 SV=2 -<br>[CATB_MOUSE]                                                        | 37.46 | 1 | 10 | 10 | 47 | 0.98 | 1.00 | 0.99 | 0.96 | 1.01 | 1.01 | 1.04 | 0.98 | 0.99 | 0.90 | 0.97 | 0.93 | 1.05 | 37.26 | 5.91 |
| Q9QXB9 | Developmentally-<br>regulated GTP-binding<br>protein 2 OS=Mus<br>musculus GN=Drg2<br>PE=1 SV=1 -<br>[DRG2_MOUSE]             | 18.68 | 1 | 5  | 6  | 9  | 0.95 | 0.80 | 1.06 | 0.98 | 1.11 | 1.00 | 1.08 | 0.98 | 1.03 | 0.83 | 0.89 | 1.14 | 1.08 | 40.69 | 8.88 |
| Q9CPW7 | Zinc finger matrin-type<br>protein 2 OS=Mus<br>musculus GN=Zmat2<br>PE=2 SV=1 -<br>[ZMAT2_MOUSE]                             | 37.19 | 1 | 5  | 5  | 12 | 0.98 | 0.94 | 0.88 | 1.00 | 1.03 | 1.17 | 1.02 | 0.98 | 1.10 | 1.01 | 0.94 | 1.01 | 0.88 | 23.60 | 9.01 |
| Q61271 | Activin receptor type-<br>1B OS=Mus musculus<br>GN=Acvr1b PE=1<br>SV=1 -<br>[ACV1B_MOUSE]                                    | 5.94  | 1 | 2  | 2  | 4  | 0.92 | 1.08 | 1.14 | 0.98 | 1.08 | 0.94 | 1.07 | 0.98 | 1.02 | 0.90 | 1.03 | 1.11 | 1.07 | 56.66 | 7.17 |
| Q99M71 | Mammalian<br>ependymin-related<br>protein 1 OS=Mus<br>musculus GN=Epdrl<br>PE=2 SV=1 -<br>[EPDR1_MOUSE]                      | 34.38 | 2 | 7  | 7  | 36 | 1.07 | 0.89 | 0.82 | 0.88 | 0.82 | 0.95 | 0.91 | 0.98 | 0.91 | 0.92 | 0.85 | 0.92 | 0.84 | 25.47 | 7.58 |

|        |                                                                                                          |       |   |    |    |    |      |      |      |      |      |      |      |      |      |      |      |      |      |       |       |      |
|--------|----------------------------------------------------------------------------------------------------------|-------|---|----|----|----|------|------|------|------|------|------|------|------|------|------|------|------|------|-------|-------|------|
| Q64669 | NAD(P)H dehydrogenase [quinone] 1 OS=Mus musculus GN=Nqo1 PE=1 SV=3 - [NQO1_MOUSE]                       | 6.57  | 1 | 2  | 2  | 2  | 2    | 1.00 | 0.96 | 0.96 | 1.03 | 1.03 | 1.07 | 1.06 | 0.98 | 0.98 | 1.00 | 1.00 | 0.98 | 0.98  | 30.94 | 8.72 |
| Q8JZM7 | Parafibromin OS=Mus musculus GN=Cdc73 PE=2 SV=1 - [CDC73_MOUSE]                                          | 2.82  | 1 | 1  | 2  | 8  | 0.88 | 1.24 | 1.33 | 0.96 | 1.05 | 0.88 | 1.01 | 0.98 | 1.11 | 0.98 | 1.06 | 0.94 | 0.97 | 60.54 | 9.61  |      |
| Q9JME9 | V-set and transmembrane domain-containing protein 2B OS=Mus musculus GN=Vstm2b PE=2 SV=1 - [VTM2B_MOUSE] | 4.21  | 1 | 1  | 1  | 1  | 1.18 | 1.19 | 1.01 | 0.89 | 0.76 | 1.27 | 1.07 | 0.98 | 0.83 | 0.96 | 0.82 | 1.05 | 0.89 | 30.14 | 7.15  |      |
| J3QQ40 | Torsin-1A-interacting protein 1 OS=Mus musculus GN=Tor1aip1 PE=4 SV=1 - [J3QQ40_MOUSE]                   | 8.93  | 4 | 2  | 2  | 4  | 0.94 | 1.08 | 1.15 | 1.07 | 1.14 | 1.18 | 1.25 | 0.98 | 1.04 | 1.14 | 1.22 | 1.16 | 1.23 | 32.76 | 7.47  |      |
| E9Q066 | La-related protein 4 OS=Mus musculus GN=Larp4 PE=2 SV=1 - [E9Q066_MOUSE]                                 | 5.15  | 3 | 3  | 3  | 4  | 1.04 | 1.12 | 1.07 | 0.90 | 0.87 | 0.97 | 0.93 | 0.98 | 0.83 | 0.88 | 0.97 | 1.02 | 1.03 | 79.55 | 6.51  |      |
| Q9DC77 | Small muscular protein OS=Mus musculus GN=Smpx PE=2 SV=2 - [SMPX_MOUSE]                                  | 45.88 | 1 | 2  | 2  | 6  | 0.88 | 0.69 | 0.86 | 0.92 | 1.00 | 1.24 | 1.60 | 0.98 | 1.12 | 0.92 | 1.09 | 0.80 | 0.95 | 9.25  | 9.70  |      |
| Q9D8S4 | Oligoribonuclease, mitochondrial OS=Mus musculus GN=Rexo2 PE=1 SV=2 - [ORN_MOUSE]                        | 28.27 | 1 | 7  | 7  | 19 | 0.93 | 0.73 | 0.78 | 0.76 | 0.90 | 1.04 | 1.13 | 0.98 | 1.05 | 0.96 | 1.08 | 0.85 | 0.94 | 26.72 | 7.15  |      |
| P53798 | Squalene synthase OS=Mus musculus GN=Fdft1 PE=2 SV=2 - [FDFT_MOUSE]                                      | 2.40  | 1 | 1  | 1  | 7  | 0.95 | 1.24 | 1.43 | 1.05 | 1.13 | 1.02 | 1.07 | 0.98 | 1.06 | 0.97 | 1.04 | 1.02 | 1.03 | 48.12 | 6.32  |      |
| Q78T81 | Protein FAM102A OS=Mus musculus GN=Fam102a PE=1 SV=1 - [F102A_MOUSE]                                     | 2.30  | 1 | 1  | 1  | 2  | 1.04 | 1.07 | 1.02 | 1.01 | 0.97 | 1.13 | 1.08 | 0.98 | 0.94 | 1.04 | 1.00 | 0.87 | 0.83 | 42.80 | 8.56  |      |
| A2AN84 | 55 kDa erythrocyte membrane protein OS=Mus musculus GN=Mpp1 PE=2 SV=1 - [A2AN84_MOUSE]                   | 25.22 | 6 | 10 | 10 | 13 | 0.93 | 0.95 | 1.06 | 0.98 | 1.03 | 1.01 | 1.05 | 0.98 | 1.04 | 1.06 | 1.14 | 0.96 | 1.00 | 50.50 | 9.19  |      |
| Q9JJV4 | Voltage-dependent calcium channel gamma-4 subunit OS=Mus musculus GN=Cacng4 PE=1 SV=1 - [CCG4_MOUSE]     | 8.26  | 1 | 1  | 1  | 2  | 1.21 | 5.02 | 4.14 | 1.06 | 0.87 | 0.84 | 0.69 | 0.98 | 0.81 | 0.99 | 0.82 | 1.37 | 1.13 | 36.51 | 9.11  |      |
| P53811 | Phosphatidylinositol transfer protein beta isoform OS=Mus musculus GN=Pitpnb PE=1 SV=2 - [PIPNB_MOUSE]   | 32.47 | 1 | 7  | 9  | 18 | 1.06 | 1.15 | 1.07 | 1.05 | 0.97 | 1.00 | 0.95 | 0.98 | 0.93 | 0.98 | 0.96 | 1.17 | 1.15 | 31.47 | 6.95  |      |

|          |                                                                                                                                      |       |    |    |    |    |      |      |      |      |      |      |      |      |      |      |      |      |      |        |      |
|----------|--------------------------------------------------------------------------------------------------------------------------------------|-------|----|----|----|----|------|------|------|------|------|------|------|------|------|------|------|------|------|--------|------|
| Q2YDW2   | Isoform 2 of Protein misato homolog 1 OS=Mus musculus GN=Msto1 - [MSTO1_MOUSE]                                                       | 3.15  | 4  | 1  | 1  | 2  | 0.97 | 0.96 | 0.99 | 1.11 | 1.14 | 0.99 | 1.01 | 0.98 | 1.01 | 1.08 | 1.11 | 1.17 | 1.21 | 49.26  | 6.07 |
| P28658   | Ataxin-10 OS=Mus musculus GN=Atxn10 PE=1 SV=2 - [ATX10_MOUSE]                                                                        | 17.89 | 1  | 7  | 7  | 16 | 1.24 | 0.92 | 0.81 | 1.13 | 0.90 | 0.99 | 0.83 | 0.98 | 0.84 | 1.03 | 0.91 | 1.06 | 0.94 | 53.67  | 5.25 |
| Q8C3F2-3 | Isoform 3 of Constitutive coactivator of PPAR-gamma-like protein 2 OS=Mus musculus GN=Fam120c - [F120C_MOUSE]                        | 2.91  | 2  | 2  | 2  | 3  | 0.94 | 0.91 | 0.97 | 1.05 | 1.11 | 1.08 | 1.14 | 0.98 | 1.04 | 1.01 | 1.08 | 0.89 | 0.95 | 109.51 | 8.59 |
| Q7TNL9   | Coiled-coil-helix-coiled-coil-helix domain containing 10 OS=Mus musculus GN=Chchd10 PE=2 SV=1 - [Q7TNL9_MOUSE]                       | 16.67 | 1  | 1  | 1  | 5  | 0.93 | 0.81 | 0.62 | 1.03 | 0.98 | 0.79 | 0.89 | 0.98 | 0.86 | 1.09 | 1.08 | 0.89 | 0.89 | 13.80  | 8.22 |
| Q9R0N9   | Synaptotagmin-9 OS=Mus musculus GN=Syr9 PE=1 SV=2 - [SYT9_MOUSE]                                                                     | 3.67  | 1  | 1  | 1  | 2  | 0.90 | 1.45 | 1.61 | 0.86 | 0.96 | 1.02 | 1.13 | 0.98 | 1.09 | 1.03 | 1.15 | 1.20 | 1.34 | 56.23  | 7.24 |
| Q6P5D8   | Structural maintenance of chromosomes flexible hinge domain-containing protein 1 OS=Mus musculus GN=Smchd1 PE=1 SV=2 - [SMHD1_MOUSE] | 1.94  | 1  | 3  | 3  | 6  | 0.95 | 1.29 | 1.36 | 1.10 | 1.11 | 1.04 | 1.00 | 0.98 | 1.06 | 0.99 | 1.04 | 1.14 | 1.18 | 225.51 | 7.24 |
| J3QN27   | Calcium-activated potassium channel subunit alpha-1 OS=Mus musculus GN=Kenma1 PE=4 SV=1 - [J3QN27_MOUSE]                             | 9.89  | 14 | 8  | 8  | 21 | 1.04 | 1.14 | 1.13 | 1.13 | 1.03 | 0.98 | 1.00 | 0.99 | 0.98 | 0.98 | 0.95 | 0.95 | 0.92 | 127.14 | 6.62 |
| Q80VP5-2 | Isoform 2 of Probable peptide chain release factor C12orf65 homolog, mitochondrial OS=Mus musculus - [CL065_MOUSE]                   | 14.84 | 2  | 1  | 1  | 1  | 0.88 | 1.24 | 1.40 | 0.77 | 0.88 | 1.12 | 1.26 | 0.99 | 1.11 | 1.12 | 1.27 | 1.02 | 1.16 | 13.66  | 9.03 |
| B7FAU9   | Filamin, alpha OS=Mus musculus GN=Flna PE=4 SV=1 - [B7FAU9_MOUSE]                                                                    | 19.93 | 8  | 31 | 34 | 68 | 0.97 | 1.07 | 1.04 | 0.97 | 0.97 | 0.84 | 0.85 | 0.99 | 0.96 | 1.04 | 1.09 | 0.89 | 0.91 | 280.33 | 6.01 |
| Q8VHC3   | Selenoprotein M OS=Mus musculus GN=Selm PE=1 SV=3 - [SELM_MOUSE]                                                                     | 54.48 | 1  | 5  | 5  | 13 | 0.94 | 0.90 | 0.92 | 0.91 | 0.86 | 1.04 | 1.04 | 0.99 | 1.05 | 0.95 | 1.02 | 0.92 | 0.97 | 16.37  | 5.54 |
| Q8BK64   | Activator of 90 kDa heat shock protein ATPase homolog 1 OS=Mus musculus GN=Ahsa1 PE=2 SV=2 - [AHS1_MOUSE]                            | 27.81 | 1  | 7  | 7  | 21 | 1.16 | 1.36 | 1.20 | 1.15 | 1.03 | 0.96 | 0.90 | 0.99 | 0.90 | 0.98 | 0.89 | 1.13 | 0.92 | 38.09  | 5.53 |

|          |                                                                                                                           |       |   |    |    |     |      |      |      |      |      |      |      |      |      |      |      |      |      |        |       |
|----------|---------------------------------------------------------------------------------------------------------------------------|-------|---|----|----|-----|------|------|------|------|------|------|------|------|------|------|------|------|------|--------|-------|
| Q8CGP0   | Histone H2B type 3-B<br>OS=Mus musculus<br>GN=Hist3h2bb PE=1<br>SV=3 -<br>[H2B3B_MOUSE]                                   | 47.62 | 3 | 3  | 7  | 101 | 1.03 | 0.89 | 0.93 | 0.95 | 1.02 | 1.22 | 1.19 | 0.99 | 1.04 | 1.15 | 1.12 | 1.22 | 1.17 | 13.90  | 10.32 |
| P47968   | Ribose-5-phosphate<br>isomerase OS=Mus<br>musculus GN=Rpia<br>PE=2 SV=2 -<br>[RPIA_MOUSE]                                 | 9.57  | 1 | 2  | 2  | 4   | 0.95 | 0.98 | 1.03 | 0.93 | 0.98 | 0.98 | 1.03 | 0.99 | 1.04 | 0.95 | 1.00 | 0.99 | 1.05 | 32.43  | 8.02  |
| E9PUC5   | PH and SEC7 domain-<br>containing protein 3<br>OS=Mus musculus<br>GN=Psd3 PE=2 SV=1 -<br>[E9PUC5_MOUSE]                   | 55.59 | 2 | 1  | 21 | 101 | 1.02 | 0.73 | 0.72 | 0.98 | 0.96 | 1.00 | 0.98 | 0.99 | 0.96 | 0.87 | 0.85 | 0.87 | 0.86 | 42.27  | 9.60  |
| B1AXV0   | DOMON domain-<br>containing protein<br>FRRS1L OS=Mus<br>musculus GN=Frrs1<br>PE=1 SV=1 -<br>[FRS1L_MOUSE]                 | 26.62 | 2 | 7  | 7  | 16  | 1.03 | 1.05 | 0.97 | 1.08 | 1.04 | 0.99 | 0.90 | 0.99 | 0.87 | 0.90 | 0.86 | 0.99 | 0.94 | 32.49  | 5.43  |
| J3KM06   | Protein<br>5730455P16Rik<br>OS=Mus musculus<br>GN=5730455P16Rik<br>PE=4 SV=1 -<br>[J3KM06_MOUSE]                          | 5.09  | 2 | 1  | 1  | 2   | 0.95 | 0.95 | 1.00 | 0.99 | 1.04 | 0.99 | 1.04 | 0.99 | 1.04 | 1.00 | 1.06 | 1.10 | 1.17 | 44.38  | 5.05  |
| E9QK48   | Echinoderm<br>microtubule-associated<br>protein-like 2 OS=Mus<br>musculus GN=Eml2<br>PE=2 SV=1 -<br>[E9QK48_MOUSE]        | 10.23 | 5 | 7  | 7  | 11  | 0.89 | 0.99 | 1.23 | 0.94 | 1.03 | 0.82 | 0.93 | 0.99 | 0.96 | 1.04 | 1.05 | 0.84 | 0.98 | 90.74  | 6.98  |
| P26638   | Serine--tRNA ligase,<br>cytoplasmic OS=Mus<br>musculus GN=Sars<br>PE=2 SV=3 -<br>[SYSC_MOUSE]                             | 47.66 | 4 | 18 | 18 | 41  | 1.02 | 0.98 | 1.02 | 1.12 | 1.12 | 1.01 | 0.99 | 0.99 | 0.94 | 0.97 | 0.90 | 1.01 | 0.98 | 58.35  | 6.30  |
| P54818   | Galactocerebrosidase<br>OS=Mus musculus<br>GN=Galc PE=1 SV=2 -<br>[GALC_MOUSE]                                            | 2.34  | 1 | 1  | 1  | 2   | 0.98 | 1.13 | 1.15 | 1.13 | 1.14 | 0.97 | 0.99 | 0.99 | 1.00 | 1.10 | 1.12 | 1.08 | 1.10 | 77.21  | 6.74  |
| E9QP09   | Cullin-9 OS=Mus<br>musculus GN=Cul9<br>PE=3 SV=1 -<br>[E9QP09_MOUSE]                                                      | 0.44  | 1 | 1  | 1  | 2   | 0.93 | 1.11 | 1.18 | 1.07 | 1.15 | 0.95 | 1.01 | 0.99 | 1.05 | 0.98 | 1.05 | 1.05 | 1.13 | 281.07 | 5.59  |
| Q3V492   | F-box only protein 22<br>OS=Mus musculus<br>GN=Fbxo22 PE=2<br>SV=1 -<br>[Q3V492_MOUSE]                                    | 5.69  | 2 | 2  | 2  | 2   | 1.02 | 1.41 | 1.38 | 1.11 | 1.08 | 0.91 | 0.88 | 0.99 | 0.96 | 0.91 | 0.89 | 1.03 | 1.01 | 32.99  | 6.84  |
| O35226-2 | Isoform Rpn10B of<br>26S proteasome non-<br>ATPase regulatory<br>subunit 4 OS=Mus<br>musculus GN=Psmd4 -<br>[PSMD4_MOUSE] | 29.02 | 4 | 1  | 10 | 38  | 0.84 | 1.28 | 1.52 | 0.83 | 0.99 | 1.08 | 1.28 | 0.99 | 1.17 | 0.92 | 1.09 | 0.89 | 1.05 | 41.02  | 4.79  |

|          |                                                                                                                                                     |       |   |    |    |    |      |      |      |      |      |      |      |      |      |      |      |      |      |        |       |
|----------|-----------------------------------------------------------------------------------------------------------------------------------------------------|-------|---|----|----|----|------|------|------|------|------|------|------|------|------|------|------|------|------|--------|-------|
| B2RXW8   | Ppfia1 protein<br>OS=Mus musculus<br>GN=Ppfia1 PE=2<br>SV=1 -<br>[B2RXW8_MOUSE]                                                                     | 8.86  | 1 | 2  | 10 | 28 | 0.90 | 0.85 | 0.95 | 0.94 | 1.05 | 0.96 | 1.06 | 0.99 | 1.09 | 0.99 | 1.10 | 0.99 | 1.10 | 140.05 | 6.14  |
| P22005   | Proenkephalin-A<br>OS=Mus musculus<br>GN=Penk PE=2 SV=2 -<br>[PENK_MOUSE]                                                                           | 37.31 | 2 | 7  | 7  | 27 | 1.46 | 0.94 | 0.60 | 1.04 | 0.68 | 1.10 | 0.74 | 0.99 | 0.69 | 1.48 | 1.05 | 1.90 | 1.23 | 30.98  | 5.68  |
| Q9QZ23   | NFU1 iron-sulfur<br>cluster scaffold<br>homolog,<br>mitochondrial OS=Mus<br>musculus GN=Nfu1<br>PE=1 SV=2 -<br>[NFU1_MOUSE]                         | 29.41 | 1 | 3  | 6  | 36 | 0.99 | 0.92 | 0.89 | 0.90 | 0.92 | 1.01 | 1.01 | 0.99 | 1.05 | 0.96 | 1.02 | 0.91 | 0.89 | 28.55  | 5.03  |
| Q61743   | ATP-sensitive inward<br>rectifier potassium<br>channel 11 OS=Mus<br>musculus GN=Kcnj11<br>PE=2 SV=1 -<br>[IRK11_MOUSE]                              | 2.82  | 1 | 1  | 1  | 2  | 0.94 | 1.00 | 1.06 | 1.05 | 1.12 | 0.86 | 0.91 | 0.99 | 1.05 | 1.01 | 1.07 | 0.81 | 0.86 | 43.53  | 8.19  |
| Q8K366   | Exosc10 protein<br>OS=Mus musculus<br>GN=Exosc10 PE=2<br>SV=1 -<br>[Q8K366_MOUSE]                                                                   | 2.44  | 3 | 2  | 2  | 2  | 0.89 | 0.85 | 0.96 | 0.99 | 1.12 | 0.93 | 1.04 | 0.99 | 0.98 | 0.99 | 1.11 | 0.96 | 1.08 | 98.05  | 8.29  |
| Q3UV70   | [Pyruvate<br>dehydrogenase [acetyl-<br>transferring]]-<br>phosphatase 1,<br>mitochondrial OS=Mus<br>musculus GN=Pdp1<br>PE=2 SV=1 -<br>[PDP1_MOUSE] | 12.45 | 4 | 5  | 5  | 8  | 0.97 | 1.05 | 1.03 | 0.97 | 0.99 | 0.91 | 0.99 | 0.99 | 0.94 | 0.94 | 0.95 | 1.17 | 1.15 | 61.14  | 6.67  |
| O88712-2 | Isoform 2 of C-terminal<br>binding protein 1<br>OS=Mus musculus<br>GN=Ctbp1 -<br>[CTBP1_MOUSE]                                                      | 32.79 | 8 | 10 | 10 | 36 | 0.99 | 1.06 | 1.02 | 1.10 | 1.07 | 1.04 | 1.05 | 0.99 | 1.00 | 0.99 | 1.02 | 1.15 | 1.10 | 46.58  | 6.65  |
| P19253   | 60S ribosomal protein<br>L13a OS=Mus<br>musculus GN=Rpl13a<br>PE=1 SV=4 -<br>[RL13A_MOUSE]                                                          | 18.23 | 3 | 4  | 4  | 12 | 0.97 | 0.95 | 0.95 | 1.05 | 1.04 | 1.06 | 1.00 | 0.99 | 0.99 | 1.03 | 1.07 | 1.06 | 1.01 | 23.45  | 11.02 |
| E9QMX4   | MAP kinase-activated<br>protein kinase 2<br>OS=Mus musculus<br>GN=Rps6kc1 PE=2<br>SV=1 -<br>[E9QMX4_MOUSE]                                          | 13.64 | 5 | 9  | 9  | 15 | 0.95 | 0.94 | 1.05 | 0.96 | 1.04 | 1.00 | 1.05 | 0.99 | 1.03 | 1.04 | 1.13 | 1.01 | 1.03 | 115.70 | 4.89  |
| Q61738-4 | Isoform Alpha-7X2A<br>of Integrin alpha-7<br>OS=Mus musculus<br>GN=Itga7 -<br>[ITA7_MOUSE]                                                          | 3.49  | 7 | 2  | 2  | 4  | 0.95 | 1.12 | 1.17 | 0.98 | 1.03 | 0.91 | 0.96 | 0.99 | 1.03 | 0.95 | 1.00 | 1.06 | 1.12 | 122.07 | 6.00  |
| P97772   | Metabotropic<br>glutamate receptor 1<br>OS=Mus musculus<br>GN=Grm1 PE=2 SV=2 -<br>[GRM1_MOUSE]                                                      | 5.17  | 2 | 5  | 5  | 7  | 0.99 | 1.15 | 1.10 | 1.10 | 0.95 | 0.95 | 0.88 | 0.99 | 0.99 | 0.86 | 0.93 | 0.95 | 0.97 | 133.13 | 6.86  |
| Q6P2B1   | Transportin-3 OS=Mus<br>musculus GN=Tapo3<br>PE=1 SV=1 -<br>[TNPO3_MOUSE]                                                                           | 4.12  | 3 | 3  | 3  | 5  | 1.08 | 1.04 | 0.82 | 1.07 | 0.96 | 1.00 | 0.84 | 0.99 | 0.77 | 1.02 | 0.80 | 1.04 | 0.98 | 104.10 | 5.57  |

|        |                                                                                                                              |       |    |    |    |    |      |      |      |      |      |      |      |      |      |      |      |      |      |        |      |
|--------|------------------------------------------------------------------------------------------------------------------------------|-------|----|----|----|----|------|------|------|------|------|------|------|------|------|------|------|------|------|--------|------|
| Q6NZD2 | Sorting nexin 1<br>OS=Mus musculus<br>GN=Snx1 PE=2 SV=1<br>[Q6NZD2_MOUSE]                                                    | 35.51 | 3  | 14 | 16 | 48 | 0.90 | 1.00 | 1.06 | 0.88 | 0.94 | 0.94 | 1.01 | 0.99 | 1.04 | 0.91 | 1.00 | 0.85 | 0.96 | 58.84  | 5.26 |
| F6TCP9 | BAG family molecular<br>chaperone regulator 1<br>OS=Mus musculus<br>GN=Bag1 PE=2 SV=1<br>[F6TCP9_MOUSE]                      | 31.55 | 3  | 9  | 9  | 13 | 1.08 | 0.70 | 0.72 | 0.83 | 0.81 | 1.06 | 1.02 | 0.99 | 0.98 | 0.89 | 0.85 | 0.84 | 0.82 | 39.67  | 8.46 |
| P53702 | Cytochrome c-type<br>heme lyase OS=Mus<br>musculus GN=Hccs<br>PE=2 SV=2<br>[CCHL_MOUSE]                                      | 17.28 | 2  | 4  | 4  | 6  | 0.95 | 1.05 | 0.97 | 1.04 | 1.05 | 1.05 | 1.11 | 0.99 | 0.95 | 1.04 | 1.07 | 1.04 | 1.08 | 30.96  | 7.12 |
| Q8C5W0 | Isoform 2 of Calmin<br>OS=Mus musculus<br>GN=Clnn<br>[CLMN_MOUSE]                                                            | 8.63  | 4  | 4  | 4  | 9  | 1.09 | 0.92 | 0.93 | 1.12 | 1.06 | 1.02 | 0.94 | 0.99 | 1.02 | 1.04 | 1.04 | 0.96 | 0.98 | 102.50 | 4.92 |
| E0CXZ5 | Deoxynucleoside<br>triphosphate<br>triphosphohydrolase<br>SAMHD1 OS=Mus<br>musculus GN=Samhd1<br>PE=2 SV=1<br>[E0CXZ5_MOUSE] | 9.33  | 6  | 1  | 1  | 2  | 1.06 | 1.03 | 0.97 | 1.03 | 0.96 | 0.95 | 0.89 | 0.99 | 0.93 | 0.98 | 0.93 | 1.08 | 1.02 | 16.62  | 4.74 |
| Q9D394 | Protein RUFY3<br>OS=Mus musculus<br>GN=Rufy3 PE=1<br>SV=1<br>[RUFY3_MOUSE]                                                   | 38.59 | 3  | 2  | 16 | 64 | 1.13 | 1.04 | 0.95 | 1.13 | 0.92 | 1.03 | 0.91 | 0.99 | 0.89 | 1.12 | 0.99 | 1.14 | 1.05 | 52.97  | 5.49 |
| F8WH29 | Fibrocystin-L OS=Mus<br>musculus GN=Pkhdl11<br>PE=2 SV=1<br>[F8WH29_MOUSE]                                                   | 0.59  | 3  | 1  | 1  | 2  | 0.92 | 0.99 | 1.07 | 1.12 | 1.21 | 1.09 | 1.18 | 0.99 | 1.07 | 0.87 | 0.94 | 1.05 | 1.14 | 464.21 | 6.42 |
| Q05CL8 | La-related protein 7<br>OS=Mus musculus<br>GN=Larp7 PE=1 SV=2<br>[LARP7_MOUSE]                                               | 8.60  | 3  | 4  | 4  | 7  | 0.87 | 1.05 | 1.18 | 0.97 | 1.13 | 1.04 | 1.32 | 0.99 | 1.19 | 0.94 | 1.14 | 1.03 | 1.18 | 64.76  | 9.54 |
| Q14B80 | Potassium voltage-<br>gated channel<br>subfamily C member 2<br>OS=Mus musculus<br>GN=Kcnc2 PE=1<br>SV=1<br>[KCNC2_MOUSE]     | 12.31 | 2  | 4  | 5  | 8  | 0.92 | 1.03 | 1.10 | 1.05 | 1.11 | 0.89 | 0.94 | 0.99 | 1.05 | 0.90 | 0.96 | 0.89 | 0.97 | 70.46  | 7.69 |
| Q8BJZ0 | Zinc finger MYND<br>domain-containing<br>protein 11 OS=Mus<br>musculus<br>GN=Zmynd11 PE=2<br>SV=1<br>[Q8BJZ0_MOUSE]          | 3.10  | 10 | 2  | 2  | 2  | 1.02 | 1.35 | 1.32 | 1.03 | 1.01 | 0.92 | 0.90 | 0.99 | 0.97 | 1.01 | 0.99 | 1.27 | 1.25 | 64.23  | 9.03 |
| P41233 | ATP-binding cassette<br>sub-family A member<br>1 OS=Mus musculus<br>GN=Abca1 PE=1<br>SV=4<br>[ABCA1_MOUSE]                   | 1.55  | 1  | 2  | 2  | 3  | 1.07 | 1.10 | 1.03 | 0.97 | 0.91 | 0.83 | 0.77 | 0.99 | 0.92 | 0.99 | 0.92 | 0.99 | 0.93 | 253.75 | 6.81 |

|          |                                                                                                                  |       |    |    |    |     |      |      |      |      |      |      |      |      |      |      |      |      |      |        |      |
|----------|------------------------------------------------------------------------------------------------------------------|-------|----|----|----|-----|------|------|------|------|------|------|------|------|------|------|------|------|------|--------|------|
| P70280   | Vesicle-associated membrane protein 7<br>OS=Mus musculus<br>GN=Vamp7 PE=1<br>SV=1 -<br>[VAMP7_MOUSE]             | 5.45  | 1  | 1  | 1  | 2   | 1.25 | 4.58 | 3.65 | 1.32 | 1.05 | 1.04 | 0.83 | 0.99 | 0.79 | 1.19 | 0.96 | 1.25 | 1.00 | 24.95  | 8.60 |
| Q99NE5-4 | Isoform 6 of<br>Regulating synaptic membrane exocytosis protein 1 OS=Mus musculus<br>GN=Rims1 -<br>[RIMS1_MOUSE] | 38.88 | 13 | 10 | 37 | 90  | 0.98 | 0.98 | 0.95 | 1.02 | 1.04 | 0.91 | 0.99 | 0.99 | 0.97 | 0.95 | 0.97 | 0.93 | 0.94 | 144.84 | 9.14 |
| D3Z6I3   | Lipoyl synthase, mitochondrial OS=Mus musculus<br>GN=Lias PE=2 SV=1 -<br>[D3Z6I3_MOUSE]                          | 19.03 | 2  | 3  | 3  | 5   | 0.90 | 1.35 | 2.11 | 0.80 | 0.89 | 1.01 | 1.07 | 0.99 | 1.25 | 1.00 | 1.07 | 0.96 | 1.25 | 32.15  | 8.19 |
| P56480   | ATP synthase subunit beta, mitochondrial OS=Mus musculus<br>GN=Atp5b PE=1<br>SV=2 -<br>[ATPB_MOUSE]              | 79.40 | 1  | 30 | 30 | 946 | 0.99 | 0.97 | 0.99 | 1.03 | 1.04 | 1.01 | 1.02 | 0.99 | 0.99 | 1.02 | 1.04 | 1.03 | 1.05 | 56.27  | 5.34 |
| P45591   | Cofilin-2 OS=Mus musculus<br>GN=Cf2 PE=1 SV=1 -<br>[COF2_MOUSE]                                                  | 77.71 | 1  | 11 | 14 | 184 | 0.82 | 0.67 | 0.77 | 0.69 | 0.83 | 0.91 | 1.11 | 0.99 | 1.12 | 0.75 | 0.88 | 0.72 | 0.94 | 18.70  | 7.88 |
| P40630-2 | Isoform Nuclear of Transcription factor A, mitochondrial OS=Mus musculus<br>GN=Tfam -<br>[TFAM_MOUSE]            | 26.51 | 3  | 6  | 6  | 30  | 1.00 | 0.87 | 0.81 | 0.91 | 0.93 | 0.91 | 0.90 | 0.99 | 0.96 | 0.90 | 0.92 | 0.91 | 0.85 | 25.02  | 9.66 |
| F6XTP0   | RING finger protein 121 (Fragment) OS=Mus musculus<br>GN=Rnf121 PE=4<br>SV=1 -<br>[F6XTP0_MOUSE]                 | 10.00 | 2  | 1  | 1  | 2   | 0.95 | 1.11 | 1.18 | 1.08 | 1.14 | 0.97 | 1.02 | 0.99 | 1.04 | 0.95 | 1.00 | 0.97 | 1.03 | 19.80  | 6.42 |
| Q505D7   | Optic atrophy 3 protein homolog OS=Mus musculus<br>GN=Opa3 PE=1 SV=1 -<br>[OPA3_MOUSE]                           | 10.61 | 1  | 1  | 2  | 5   | 1.13 | 1.28 | 1.13 | 1.38 | 1.21 | 0.83 | 0.73 | 0.99 | 0.87 | 0.90 | 0.79 | 0.94 | 0.83 | 20.10  | 8.34 |
| Q9QZM0   | Ubiquitin-2 OS=Mus musculus<br>GN=Ubqln2 PE=1 SV=2 -<br>[UBQL2_MOUSE]                                            | 28.84 | 1  | 8  | 11 | 113 | 1.11 | 1.09 | 1.06 | 0.93 | 0.78 | 1.00 | 0.86 | 0.99 | 0.84 | 0.96 | 0.86 | 1.07 | 0.91 | 67.31  | 5.22 |
| Q9DCH4   | Eukaryotic translation initiation factor 3 subunit F OS=Mus musculus<br>GN=Elf3f PE=1 SV=2 -<br>[EIF3F_MOUSE]    | 19.67 | 1  | 5  | 5  | 11  | 0.99 | 1.14 | 1.17 | 1.01 | 1.04 | 0.96 | 0.99 | 0.99 | 0.97 | 0.88 | 0.92 | 1.02 | 0.99 | 37.96  | 5.58 |
| Q9QXA1-  | Isoform 3 of Cysteine and histidine-rich protein 1 OS=Mus musculus<br>GN=Cyhr1 -<br>[CYHR1_MOUSE]                | 6.80  | 4  | 1  | 1  | 2   | 1.14 | 1.26 | 1.11 | 0.84 | 0.74 | 0.87 | 0.76 | 0.99 | 0.87 | 1.13 | 1.00 | 1.48 | 1.31 | 28.09  | 6.86 |
| Q8R2U6   | Diphosphoinositol polyphosphate phosphohydrolase 2 OS=Mus musculus<br>GN=Nudt4 PE=1<br>SV=1 -<br>[NUDT4_MOUSE]   | 40.22 | 1  | 3  | 5  | 13  | 0.90 | 0.95 | 1.00 | 0.82 | 0.89 | 0.95 | 1.06 | 0.99 | 1.10 | 0.82 | 0.92 | 0.73 | 0.79 | 20.14  | 6.35 |

|          |                                                                                                                       |       |   |    |    |     |      |      |      |      |      |      |      |      |      |      |      |      |      |        |      |
|----------|-----------------------------------------------------------------------------------------------------------------------|-------|---|----|----|-----|------|------|------|------|------|------|------|------|------|------|------|------|------|--------|------|
| Q8CGF7   | Isoform 2 of Transcription elongation regulator 1 OS=Mus musculus GN=Teerg1 - [TCRG1_MOUSE]                           | 23.26 | 3 | 23 | 23 | 46  | 0.94 | 0.76 | 0.80 | 0.86 | 0.90 | 0.94 | 0.99 | 0.99 | 1.05 | 0.88 | 0.90 | 0.78 | 0.84 | 121.50 | 8.54 |
| P70188-2 | Isoform KAP3B of Kinesin-associated protein 3 OS=Mus musculus GN=Kifap3 - [KIFA3_MOUSE]                               | 4.02  | 3 | 2  | 3  | 5   | 1.04 | 1.05 | 1.02 | 1.00 | 0.96 | 0.92 | 0.88 | 0.99 | 0.95 | 0.85 | 0.82 | 1.01 | 0.98 | 88.96  | 5.20 |
| G3X8R0   | Receptor accessory protein 5, isoform CRA_a OS=Mus musculus GN=Reep5 PE=4 SV=1 - [G3X8R0_MOUSE]                       | 10.05 | 1 | 3  | 3  | 9   | 0.86 | 0.80 | 0.92 | 1.06 | 1.20 | 0.92 | 1.14 | 0.99 | 1.17 | 0.98 | 1.10 | 1.01 | 1.13 | 21.43  | 8.12 |
| Q80VQ0   | Aldehyde dehydrogenase family 3 member B1 OS=Mus musculus GN=Aldh3b1 PE=2 SV=1 - [AL3B1_MOUSE]                        | 13.03 | 3 | 4  | 4  | 9   | 1.00 | 1.11 | 1.11 | 1.09 | 1.04 | 0.93 | 0.92 | 0.99 | 1.03 | 0.99 | 0.96 | 0.98 | 1.02 | 52.26  | 7.55 |
| D3YZV2   | Potassium voltage-gated channel subfamily C member 3 OS=Mus musculus GN=Kenc3 PE=2 SV=1 - [D3YZV2_MOUSE]              | 8.45  | 6 | 4  | 5  | 7   | 0.85 | 1.08 | 1.29 | 0.97 | 1.10 | 0.92 | 1.08 | 0.99 | 1.19 | 0.87 | 1.05 | 0.88 | 1.02 | 81.89  | 6.98 |
| P11798   | Calcium/calmodulin-dependent protein kinase type II subunit alpha OS=Mus musculus GN=Camk2a PE=1 SV=2 - [KCC2A_MOUSE] | 53.14 | 4 | 1  | 21 | 209 | 1.11 | 1.03 | 0.93 | 1.32 | 1.18 | 0.99 | 0.88 | 0.99 | 0.88 | 1.12 | 1.01 | 1.05 | 0.94 | 54.08  | 7.08 |
| A2AP32   | NADH dehydrogenase [ubiquinone] 1 beta subcomplex subunit 6 OS=Mus musculus GN=Ndufb6 PE=2 SV=1 - [A2AP32_MOUSE]      | 18.56 | 2 | 1  | 1  | 8   | 0.94 | 1.61 | 1.56 | 1.22 | 1.22 | 1.01 | 1.07 | 0.99 | 1.07 | 1.03 | 1.05 | 1.04 | 1.03 | 11.73  | 9.60 |
| F8WHP8   | ATP synthase subunit f, mitochondrial OS=Mus musculus GN=Atp5j2 PE=2 SV=1 - [F8WHP8_MOUSE]                            | 31.58 | 2 | 3  | 3  | 7   | 0.95 | 1.20 | 1.34 | 1.16 | 1.26 | 0.90 | 0.94 | 0.99 | 0.99 | 1.01 | 1.15 | 1.01 | 1.06 | 9.00   | 9.88 |
| Q9Z2M6   | Ubiquitin-like protein 3 OS=Mus musculus GN=Ubi3 PE=1 SV=1 - [UBL3_MOUSE]                                             | 26.50 | 1 | 2  | 2  | 3   | 0.98 | 0.91 | 0.92 | 1.04 | 1.06 | 0.90 | 0.91 | 0.99 | 1.01 | 0.86 | 0.88 | 0.99 | 1.01 | 13.17  | 6.92 |
| Q80VP0   | Tectonin beta-propeller repeat-containing protein 1 OS=Mus musculus GN=Teopr1 PE=2 SV=1 - [TCPR1_MOUSE]               | 9.86  | 2 | 9  | 9  | 15  | 1.04 | 0.94 | 0.94 | 1.10 | 1.15 | 1.06 | 1.06 | 0.99 | 1.00 | 0.99 | 0.99 | 1.01 | 1.02 | 130.18 | 6.48 |



|          |                                                                                                                 |       |    |    |     |      |      |      |      |      |      |      |      |      |      |      |      |      |      |        |      |
|----------|-----------------------------------------------------------------------------------------------------------------|-------|----|----|-----|------|------|------|------|------|------|------|------|------|------|------|------|------|------|--------|------|
| A6X935-2 | Isoform 2 of Inter alpha-trypsin inhibitor, heavy chain 4 OS=Mus musculus GN=Itih4 - [ITIH4_MOUSE]              | 1.66  | 4  | 1  | 1   | 1    | 0.78 | 1.31 | 1.68 | 0.78 | 1.00 | 0.68 | 0.87 | 0.99 | 1.27 | 1.28 | 1.64 | 1.17 | 1.51 | 100.33 | 6.55 |
| G3UWV4   | Serine/threonine-protein kinase BRSK2 OS=Mus musculus GN=Brsk2 PE=2 SV=1 - [G3UWV4_MOUSE]                       | 21.09 | 16 | 8  | 11  | 30   | 0.93 | 0.99 | 1.05 | 1.01 | 1.12 | 0.90 | 0.94 | 0.99 | 1.04 | 0.92 | 0.97 | 0.92 | 0.96 | 77.73  | 8.82 |
| Q9Z1S5-2 | Isoform 2 of Neuronal-specific septin-3 OS=Mus musculus GN=Sept3 - [SEPT3_MOUSE]                                | 56.08 | 2  | 19 | 19  | 99   | 1.04 | 0.81 | 0.85 | 1.03 | 0.98 | 1.03 | 1.01 | 0.99 | 0.93 | 0.97 | 0.94 | 0.95 | 0.95 | 38.68  | 6.81 |
| Q91WG4   | Elongator complex protein 2 OS=Mus musculus GN=Elp2 PE=1 SV=1 - [ELP2_MOUSE]                                    | 1.08  | 1  | 1  | 1   | 2    | 1.25 | 0.91 | 0.73 | 1.08 | 0.86 | 1.03 | 0.82 | 0.99 | 0.79 | 0.92 | 0.73 | 1.08 | 0.86 | 93.03  | 5.82 |
| Q7TSZ8   | Nucleus accumbens-associated protein 1 OS=Mus musculus GN=Nacc1 PE=1 SV=1 - [NACC1_MOUSE]                       | 2.53  | 1  | 1  | 1   | 2    | 0.96 | 1.14 | 1.18 | 0.97 | 1.00 | 0.97 | 1.00 | 0.99 | 1.02 | 0.93 | 0.97 | 1.14 | 1.18 | 56.50  | 5.73 |
| O35954   | Membrane-associated phosphatidylinositol transfer protein 1 OS=Mus musculus GN=Pitpm1 PE=1 SV=1 - [PITM1_MOUSE] | 9.33  | 2  | 9  | 9   | 19   | 0.97 | 1.09 | 1.15 | 1.11 | 1.12 | 0.98 | 1.05 | 0.99 | 0.99 | 1.03 | 1.08 | 1.02 | 1.05 | 134.86 | 6.06 |
| A3KGU5   | Spectrin alpha chain, non-erythrocytic 1 OS=Mus musculus GN=Sptan1 PE=2 SV=1 - [A3KGU5_MOUSE]                   | 80.83 | 4  | 3  | 215 | 5378 | 0.97 | 0.75 | 0.75 | 0.89 | 0.91 | 0.98 | 0.98 | 0.99 | 1.03 | 0.88 | 0.89 | 0.86 | 0.88 | 282.72 | 5.33 |
| Q91Z67   | SLIT-ROBO Rho GTPase-activating protein 2 OS=Mus musculus GN=Srgap2 PE=1 SV=2 - [SRGP2_MOUSE]                   | 15.50 | 1  | 12 | 13  | 26   | 0.98 | 0.95 | 1.01 | 0.99 | 1.05 | 0.97 | 1.05 | 0.99 | 0.99 | 1.00 | 1.00 | 0.91 | 0.97 | 120.72 | 6.64 |
| Q8CIV8   | Tubulin-specific chaperone E OS=Mus musculus GN=Tbce PE=1 SV=1 - [TBCE_MOUSE]                                   | 8.59  | 2  | 3  | 3   | 4    | 1.06 | 1.06 | 0.95 | 1.26 | 1.18 | 1.10 | 0.98 | 0.99 | 0.93 | 1.04 | 1.04 | 1.04 | 0.96 | 59.05  | 6.29 |
| O35887   | Calumenin OS=Mus musculus GN=Calu PE=1 SV=1 - [CALU_MOUSE]                                                      | 66.35 | 7  | 4  | 16  | 181  | 1.09 | 0.95 | 0.89 | 0.87 | 0.81 | 1.08 | 0.96 | 0.99 | 1.00 | 1.12 | 0.94 | 0.96 | 0.98 | 37.04  | 4.67 |
| P63032   | GTP-binding protein Rhes OS=Mus musculus GN=Rasd2 PE=2 SV=1 - [RHES_MOUSE]                                      | 4.89  | 1  | 1  | 1   | 2    | 0.87 | 1.17 | 1.35 | 1.17 | 1.34 | 0.96 | 1.11 | 0.99 | 1.14 | 1.13 | 1.30 | 1.31 | 1.52 | 30.18  | 9.01 |

|        |                                                                                                                        |       |   |   |   |    |      |      |      |      |      |      |      |      |      |      |      |      |      |        |       |
|--------|------------------------------------------------------------------------------------------------------------------------|-------|---|---|---|----|------|------|------|------|------|------|------|------|------|------|------|------|------|--------|-------|
| B1AVZ0 | Uracil phosphoribosyltransferase homolog OS=Mus musculus GN=Uppt PE=2 SV=1 - [UPP_MOUSE]                               | 6.45  | 1 | 2 | 2 | 6  | 0.98 | 1.04 | 1.07 | 0.90 | 0.88 | 0.92 | 0.93 | 0.99 | 0.96 | 0.90 | 0.89 | 0.93 | 0.92 | 34.26  | 6.23  |
| P47963 | 60S ribosomal protein L13 OS=Mus musculus GN=Rpl13 PE=2 SV=3 - [RL13_MOUSE]                                            | 34.60 | 2 | 7 | 7 | 22 | 0.96 | 1.14 | 1.09 | 1.02 | 1.02 | 0.93 | 1.02 | 0.99 | 0.98 | 0.99 | 1.02 | 1.00 | 1.06 | 24.29  | 11.55 |
| Q9D1F0 | CAAX box 1 homolog A (Human) OS=Mus musculus GN=Cxx1b PE=4 SV=1 - [Q9D1F0_MOUSE]                                       | 8.85  | 1 | 1 | 1 | 1  | 0.98 | 0.85 | 0.87 | 1.44 | 1.47 | 1.03 | 1.05 | 0.99 | 1.01 | 1.12 | 1.14 | 1.03 | 1.05 | 13.59  | 8.40  |
| Q9D7M1 | Glucose-induced degradation protein 8 homolog OS=Mus musculus GN=Gid8 PE=2 SV=1 - [GID8_MOUSE]                         | 57.46 | 1 | 8 | 8 | 30 | 1.06 | 1.01 | 0.98 | 0.87 | 0.90 | 0.89 | 0.90 | 0.99 | 0.99 | 0.79 | 0.87 | 1.01 | 0.90 | 26.76  | 4.97  |
| D3YTQ9 | 40S ribosomal protein S15 OS=Mus musculus GN=Rps15 PE=2 SV=1 - [D3YTQ9_MOUSE]                                          | 50.00 | 2 | 4 | 4 | 24 | 0.98 | 0.73 | 0.72 | 1.00 | 1.02 | 1.02 | 0.96 | 0.99 | 0.94 | 0.95 | 1.01 | 0.94 | 0.96 | 13.73  | 10.59 |
| Q9D287 | Pre-mRNA-splicing factor SPF27 OS=Mus musculus GN=Beas2 PE=2 SV=1 - [SPF27_MOUSE]                                      | 36.00 | 2 | 6 | 6 | 15 | 0.92 | 0.82 | 0.94 | 0.87 | 0.93 | 1.05 | 1.14 | 0.99 | 1.16 | 0.88 | 1.01 | 0.80 | 0.92 | 26.11  | 5.66  |
| Q61425 | Hydroxyacyl-coenzyme A dehydrogenase, mitochondrial OS=Mus musculus GN=Hadh PE=1 SV=2 - [HCDH_MOUSE]                   | 40.13 | 2 | 8 | 9 | 29 | 0.99 | 1.12 | 1.09 | 1.02 | 1.22 | 0.98 | 1.15 | 0.99 | 1.13 | 1.07 | 1.25 | 1.03 | 1.19 | 34.44  | 8.65  |
| D3Z2D8 | Transmembrane protein 63B (Fragment) OS=Mus musculus GN=Tmem63b PE=2 SV=1 - [D3Z2D8_MOUSE]                             | 2.58  | 2 | 1 | 1 | 1  | 1.15 | 1.37 | 1.18 | 1.11 | 0.96 | 0.83 | 0.72 | 0.99 | 0.86 | 0.84 | 0.73 | 0.97 | 0.84 | 34.89  | 8.43  |
| Q8K1C0 | Isoform 4 of Protein angel homolog 2 OS=Mus musculus GN=Angel2 - [ANGE2_MOUSE]                                         | 8.49  | 5 | 1 | 1 | 2  | 1.03 | 1.49 | 1.44 | 1.23 | 1.19 | 0.91 | 0.88 | 0.99 | 0.96 | 1.19 | 1.16 | 1.17 | 1.14 | 24.05  | 8.07  |
| Q8K4S1 | 1-phosphatidylinositol 4,5-bisphosphate phosphodiesterase epsilon-1 OS=Mus musculus GN=Plce1 PE=1 SV=3 - [PLCE1_MOUSE] | 1.10  | 1 | 1 | 1 | 10 | 0.91 | 0.67 | 0.74 | 0.74 | 0.81 | 0.87 | 0.94 | 0.99 | 1.08 | 0.86 | 0.94 | 0.70 | 0.77 | 254.89 | 6.15  |
| Q0GA42 | Metal transporter CNNM1 OS=Mus musculus GN=Cnm1 PE=1 SV=5 - [CNNM1_MOUSE]                                              | 10.83 | 2 | 5 | 8 | 13 | 1.08 | 1.17 | 1.22 | 1.06 | 0.96 | 0.82 | 0.91 | 0.99 | 0.91 | 1.01 | 0.97 | 1.05 | 1.00 | 103.92 | 6.51  |

|          |                                                                                                                        |       |   |    |    |     |      |      |      |      |      |      |      |      |      |      |      |      |      |        |      |
|----------|------------------------------------------------------------------------------------------------------------------------|-------|---|----|----|-----|------|------|------|------|------|------|------|------|------|------|------|------|------|--------|------|
| P03958   | Adenosine deaminase OS=Mus musculus GN=Ada PE=1 SV=3 - [ADA_MOUSE]                                                     | 3.69  | 1 | 1  | 1  | 1   | 0.93 | 1.67 | 1.79 | 0.79 | 0.85 | 1.36 | 1.45 | 0.99 | 1.06 | 0.76 | 0.82 | 1.07 | 1.15 | 39.97  | 5.72 |
| E9QLS6   | Phosphatidylinositol 3-kinase catalytic subunit type 3 OS=Mus musculus GN=Pik3c3 PE=2 SV=1 - [E9QLS6_MOUSE]            | 3.54  | 4 | 2  | 2  | 4   | 1.15 | 1.08 | 0.93 | 1.30 | 1.13 | 1.17 | 1.01 | 0.99 | 0.86 | 1.21 | 1.05 | 1.19 | 1.03 | 96.81  | 7.20 |
| Q920P5   | Adenylate kinase isoenzyme 5 OS=Mus musculus GN=Ak5 PE=2 SV=2 - [KAD5_MOUSE]                                           | 29.18 | 2 | 12 | 12 | 24  | 1.03 | 1.04 | 1.01 | 0.95 | 0.95 | 1.06 | 1.06 | 0.99 | 1.04 | 0.97 | 0.95 | 1.06 | 1.02 | 63.28  | 5.29 |
| P60755   | MAM domain-containing glycosylphosphatidylinositol anchor protein 2 OS=Mus musculus GN=Mdga2 PE=2 SV=1 - [MDGA2_MOUSE] | 7.06  | 4 | 4  | 4  | 8   | 0.95 | 1.04 | 1.04 | 1.08 | 1.08 | 0.99 | 0.98 | 0.99 | 0.98 | 0.94 | 0.99 | 0.93 | 0.94 | 106.62 | 7.02 |
| Q9Z2C9   | Myotubularin-related protein 7 OS=Mus musculus GN=Mtmr7 PE=2 SV=2 - [MTMR7_MOUSE]                                      | 8.18  | 5 | 4  | 4  | 8   | 1.05 | 1.40 | 1.34 | 1.10 | 1.04 | 0.91 | 0.86 | 0.99 | 1.04 | 1.00 | 0.91 | 1.28 | 1.15 | 75.56  | 6.43 |
| Q99M51   | Cytoplasmic protein NCK1 OS=Mus musculus GN=Nck1 PE=1 SV=1 - [NCK1_MOUSE]                                              | 29.97 | 2 | 11 | 13 | 27  | 0.96 | 0.75 | 0.78 | 0.84 | 0.89 | 0.91 | 0.97 | 0.99 | 1.01 | 0.79 | 0.87 | 0.76 | 0.82 | 42.86  | 6.47 |
| O54946-2 | Isoform B of DnaJ homolog subfamily B member 6 OS=Mus musculus GN=Dnajb6 - [DNJB6_MOUSE]                               | 23.14 | 2 | 1  | 5  | 13  | 0.80 | 0.81 | 1.01 | 0.91 | 1.13 | 0.76 | 0.95 | 0.99 | 1.23 | 0.87 | 1.09 | 0.78 | 0.98 | 26.96  | 7.61 |
| Q8C522   | Endonuclease domain-containing 1 protein OS=Mus musculus GN=Endod1 PE=1 SV=2 - [ENDD1_MOUSE]                           | 16.77 | 1 | 6  | 6  | 25  | 0.97 | 1.01 | 1.09 | 0.99 | 1.01 | 0.96 | 1.00 | 0.99 | 0.98 | 1.02 | 1.07 | 1.04 | 1.04 | 55.23  | 6.16 |
| E9Q7S0   | Synaptotagmin-1 OS=Mus musculus GN=Synj1 PE=2 SV=1 - [E9Q7S0_MOUSE]                                                    | 48.20 | 7 | 45 | 48 | 177 | 1.03 | 1.00 | 0.98 | 1.05 | 1.02 | 1.00 | 0.97 | 0.99 | 0.93 | 0.98 | 0.96 | 1.01 | 0.98 | 144.50 | 7.34 |
| Q8BIX3   | ARL14 effector protein OS=Mus musculus GN=Arl14ep PE=2 SV=1 - [AL14E_MOUSE]                                            | 3.26  | 1 | 1  | 1  | 2   | 0.94 | 0.84 | 0.89 | 0.89 | 0.94 | 0.95 | 1.00 | 0.99 | 1.05 | 0.92 | 0.97 | 0.95 | 1.01 | 30.99  | 8.24 |
| A2AUR7   | Ras suppressor protein 1 OS=Mus musculus GN=Rsu1 PE=4 SV=1 - [A2AUR7_MOUSE]                                            | 16.15 | 3 | 4  | 4  | 5   | 0.93 | 0.89 | 1.02 | 0.96 | 1.06 | 1.00 | 1.08 | 0.99 | 1.11 | 0.98 | 1.10 | 0.90 | 0.96 | 29.52  | 8.22 |
| Q9QYB8   | Beta-adducin OS=Mus musculus GN=Add2 PE=1 SV=4 - [ADDB_MOUSE]                                                          | 58.21 | 3 | 34 | 34 | 209 | 0.98 | 0.94 | 0.91 | 0.99 | 1.03 | 1.02 | 1.02 | 0.99 | 1.02 | 0.95 | 0.99 | 0.96 | 0.96 | 80.59  | 6.21 |

|          |                                                                                                      |       |   |    |    |    |      |      |      |      |      |      |      |      |      |      |      |      |      |        |      |
|----------|------------------------------------------------------------------------------------------------------|-------|---|----|----|----|------|------|------|------|------|------|------|------|------|------|------|------|------|--------|------|
| P53996   | Cellular nucleic acid-binding protein<br>OS=Mus musculus<br>GN=Cnbp PE=2 SV=2<br>-[CNBP_MOUSE]       | 35.96 | 1 | 1  | 5  | 26 | 1.09 | 1.01 | 0.92 | 0.94 | 0.86 | 1.06 | 0.96 | 0.99 | 0.91 | 0.89 | 0.81 | 0.81 | 0.74 | 19.58  | 7.58 |
| Q61187   | Tumor susceptibility gene 101 protein<br>OS=Mus musculus<br>GN=Tsg101 PE=1 SV=2<br>-[TS101_MOUSE]    | 21.23 | 2 | 8  | 8  | 13 | 1.08 | 0.91 | 0.82 | 1.03 | 1.08 | 1.06 | 0.87 | 0.99 | 0.81 | 0.92 | 0.83 | 0.95 | 0.84 | 44.10  | 6.71 |
| D6RE34   | Protein Cln6 OS=Mus musculus<br>GN=Cln6 PE=2 SV=1<br>-[D6RE34_MOUSE]                                 | 42.50 | 2 | 1  | 1  | 2  | 1.03 | 1.31 | 1.27 | 1.11 | 1.07 | 0.94 | 0.91 | 0.99 | 0.96 | 0.99 | 0.96 | 1.09 | 1.06 | 4.31   | 9.98 |
| Q8C8T7   | Protein ELFN1 OS=Mus musculus<br>GN=Elfn1 PE=2 SV=1<br>-[ELFN1_MOUSE]                                | 5.07  | 1 | 2  | 4  | 14 | 1.13 | 0.86 | 0.94 | 0.95 | 0.88 | 1.20 | 1.15 | 0.99 | 1.03 | 1.13 | 1.09 | 0.94 | 0.93 | 90.76  | 8.18 |
| P26041   | Moesin OS=Mus musculus<br>GN=Msn PE=1 SV=3<br>-[MOES_MOUSE]                                          | 51.30 | 1 | 18 | 30 | 74 | 0.99 | 1.03 | 1.07 | 1.03 | 1.03 | 0.96 | 0.97 | 0.99 | 0.95 | 1.01 | 1.02 | 1.04 | 0.99 | 67.72  | 6.60 |
| P80316   | T-complex protein 1 subunit epsilon<br>OS=Mus musculus<br>GN=Cct5 PE=1 SV=1<br>-[TCPPE_MOUSE]        | 58.41 | 2 | 24 | 25 | 68 | 1.02 | 0.87 | 0.88 | 1.03 | 1.04 | 0.99 | 0.99 | 0.99 | 0.97 | 0.98 | 1.06 | 1.01 | 1.02 | 59.59  | 6.02 |
| P20060   | Beta-hexosaminidase subunit beta OS=Mus musculus<br>GN=Hexb PE=2 SV=2<br>-[HEXB_MOUSE]               | 18.66 | 1 | 8  | 8  | 13 | 1.02 | 1.13 | 0.94 | 1.20 | 1.17 | 1.09 | 1.00 | 0.99 | 0.97 | 0.94 | 0.96 | 0.98 | 0.96 | 61.08  | 8.12 |
| P67778   | Prohibitin OS=Mus musculus<br>GN=Phb PE=1 SV=1<br>-[PHB_MOUSE]                                       | 69.12 | 2 | 15 | 15 | 44 | 1.01 | 1.13 | 1.18 | 1.15 | 1.18 | 0.99 | 1.03 | 0.99 | 1.00 | 1.06 | 1.10 | 0.97 | 0.99 | 29.80  | 5.76 |
| Q64520   | Guanylate kinase OS=Mus musculus<br>GN=Guk1 PE=1 SV=2<br>-[KGUA_MOUSE]                               | 36.87 | 3 | 5  | 5  | 17 | 1.02 | 0.72 | 0.69 | 0.89 | 0.90 | 1.01 | 0.98 | 0.99 | 1.00 | 0.90 | 0.88 | 0.96 | 0.94 | 21.90  | 6.55 |
| P60762-2 | Isoform 2 of Mortality factor 4-like protein 1<br>OS=Mus musculus<br>GN=Morf411<br>-[MO4L1_MOUSE]    | 4.33  | 2 | 1  | 1  | 1  | 1.02 | 1.16 | 1.13 | 1.10 | 1.07 | 0.85 | 0.82 | 0.99 | 0.97 | 1.04 | 1.02 | 1.11 | 1.09 | 37.21  | 9.19 |
| E9PWJ0   | CUB and sushi domain-containing protein 3<br>OS=Mus musculus<br>GN=Csm3 PE=2 SV=1<br>-[E9PWJ0_MOUSE] | 0.62  | 4 | 1  | 2  | 3  | 1.03 | 0.95 | 0.92 | 0.98 | 0.95 | 0.89 | 0.86 | 0.99 | 0.96 | 0.91 | 0.88 | 1.01 | 0.98 | 386.93 | 5.91 |
| K7N6Y7   | Protein Vmn2r21 OS=Mus musculus<br>GN=Vmn2r21 PE=3 SV=1<br>-[K7N6Y7_MOUSE]                           | 5.39  | 3 | 2  | 2  | 5  | 0.82 | 1.00 | 1.22 | 1.21 | 1.48 | 0.74 | 0.78 | 0.99 | 1.38 | 0.80 | 1.47 | 0.31 | 0.38 | 95.89  | 7.68 |
| Q9ERU9   | E3 SUMO-protein ligase RanBP2<br>OS=Mus musculus<br>GN=Ranbp2 PE=1 SV=2<br>-[RBP2_MOUSE]             | 10.91 | 1 | 23 | 24 | 49 | 0.93 | 1.00 | 1.06 | 1.11 | 1.21 | 0.97 | 1.02 | 0.99 | 1.08 | 0.97 | 1.06 | 0.97 | 1.04 | 340.91 | 6.18 |

|          |                                                                                                                    |       |   |    |    |     |      |      |      |      |      |      |      |      |      |      |      |      |      |        |      |
|----------|--------------------------------------------------------------------------------------------------------------------|-------|---|----|----|-----|------|------|------|------|------|------|------|------|------|------|------|------|------|--------|------|
| F8WHW3   | Transmembrane protein 55B OS=Mus musculus GN=Tmem55b PE=2 SV=1 - [F8WHW3_MOUSE]                                    | 15.88 | 5 | 3  | 3  | 6   | 1.04 | 1.13 | 0.97 | 1.06 | 0.93 | 1.07 | 0.81 | 0.99 | 0.79 | 1.13 | 0.86 | 1.09 | 1.03 | 29.31  | 8.75 |
| B1AWZ5   | Protein NipSnap homolog 3B OS=Mus musculus GN=Nipsnap3b PE=2 SV=1 - [B1AWZ5_MOUSE]                                 | 16.75 | 2 | 2  | 2  | 25  | 1.06 | 0.90 | 0.85 | 1.02 | 0.89 | 1.14 | 1.03 | 0.99 | 0.92 | 0.99 | 0.94 | 0.94 | 0.87 | 22.87  | 9.51 |
| Q8BTE0   | UPF0369 protein C6orf57 homolog OS=Mus musculus PE=2 SV=2 - [CF057_MOUSE]                                          | 25.00 | 1 | 4  | 4  | 30  | 1.12 | 1.05 | 0.98 | 0.80 | 0.76 | 1.05 | 1.03 | 0.99 | 1.00 | 0.87 | 0.84 | 1.07 | 0.95 | 11.88  | 9.50 |
| Q5SVL6   | Rap1 GTPase-activating protein 2 OS=Mus musculus GN=Rap1gap2 PE=1 SV=1 - [RPGP2_MOUSE]                             | 27.53 | 3 | 12 | 12 | 30  | 0.97 | 1.01 | 0.99 | 1.04 | 1.07 | 1.04 | 1.11 | 0.99 | 1.01 | 1.01 | 1.07 | 0.98 | 1.03 | 78.20  | 6.43 |
| Q80X90   | Filamin-B OS=Mus musculus GN=Flnb PE=1 SV=3 - [FLNB_MOUSE]                                                         | 14.22 | 5 | 25 | 28 | 52  | 0.99 | 0.89 | 0.91 | 0.98 | 1.00 | 0.89 | 0.98 | 0.99 | 1.01 | 0.96 | 1.04 | 0.97 | 0.97 | 277.65 | 5.71 |
| Q148V7-2 | Isoform 2 of LisH domain and HEAT repeat-containing protein KIAA1468 OS=Mus musculus GN=Kiaa1468 - [K1468_MOUSE]   | 26.17 | 5 | 19 | 19 | 38  | 1.01 | 1.16 | 1.14 | 1.07 | 1.06 | 0.99 | 0.97 | 0.99 | 1.03 | 0.98 | 1.04 | 0.97 | 1.02 | 131.81 | 5.29 |
| D3YU58   | Anaphase-promoting complex subunit 7 OS=Mus musculus GN=Anapc7 PE=2 SV=1 - [D3YU58_MOUSE]                          | 2.58  | 2 | 1  | 1  | 1   | 0.68 | 0.64 | 0.94 | 1.02 | 1.50 | 0.95 | 1.39 | 0.99 | 1.46 | 1.03 | 1.53 | 0.77 | 1.14 | 56.13  | 8.51 |
| Q91W67   | Ubiquitin-like protein 7 OS=Mus musculus GN=Ubl7 PE=1 SV=2 - [UBL7_MOUSE]                                          | 10.26 | 1 | 3  | 3  | 5   | 0.83 | 0.79 | 0.88 | 0.79 | 0.95 | 0.98 | 1.13 | 0.99 | 1.18 | 0.76 | 0.92 | 0.85 | 0.98 | 40.41  | 5.01 |
| Q99JW4   | LIM and senescent cell antigen-like-containing domain protein 1 OS=Mus musculus GN=Lims1 PE=1 SV=3 - [LIMS1_MOUSE] | 25.85 | 3 | 4  | 7  | 20  | 1.14 | 0.96 | 0.91 | 0.93 | 0.81 | 1.01 | 0.89 | 0.99 | 0.84 | 0.87 | 0.72 | 0.98 | 0.84 | 37.21  | 8.05 |
| P13595   | Neural cell adhesion molecule 1 OS=Mus musculus GN=Ncam1 PE=1 SV=3 - [NCAM1_MOUSE]                                 | 41.79 | 4 | 6  | 38 | 409 | 1.10 | 0.83 | 0.78 | 1.01 | 0.85 | 1.12 | 1.02 | 0.99 | 0.91 | 1.03 | 0.99 | 1.03 | 0.96 | 119.35 | 4.83 |
| P58044   | Isopentenyl-diphosphate Delta-isomerase 1 OS=Mus musculus GN=Idi1 PE=2 SV=1 - [IDI1_MOUSE]                         | 37.44 | 5 | 8  | 8  | 33  | 1.11 | 0.88 | 0.79 | 0.94 | 0.84 | 1.06 | 0.95 | 0.99 | 0.90 | 0.88 | 0.82 | 0.82 | 0.79 | 26.27  | 6.16 |
| P97801   | Survival motor neuron protein OS=Mus musculus GN=Snn1 PE=1 SV=1 - [SMN_MOUSE]                                      | 6.25  | 1 | 1  | 1  | 5   | 0.87 | 1.52 | 1.44 | 0.90 | 0.87 | 0.82 | 0.93 | 0.99 | 1.27 | 1.10 | 1.42 | 1.23 | 1.21 | 31.23  | 7.62 |

|        |                                                                                                           |       |   |    |    |     |      |      |      |      |      |      |      |      |      |      |      |      |      |       |      |
|--------|-----------------------------------------------------------------------------------------------------------|-------|---|----|----|-----|------|------|------|------|------|------|------|------|------|------|------|------|------|-------|------|
| Q3TYA4 | Syntaxin-binding protein 6 OS=Mus musculus GN=Stxbp6 PE=2 SV=1 - [Q3TYA4_MOUSE]                           | 13.81 | 4 | 3  | 3  | 6   | 1.01 | 1.18 | 1.17 | 1.18 | 1.08 | 1.04 | 0.91 | 0.99 | 0.92 | 0.99 | 0.95 | 1.02 | 1.01 | 23.67 | 9.19 |
| Q5TH34 | Protein FAM45A OS=Mus musculus GN=Fam45a PE=2 SV=1 - [Q5TH34_MOUSE]                                       | 7.63  | 2 | 1  | 1  | 2   | 0.84 | 0.96 | 1.14 | 0.94 | 1.11 | 1.08 | 1.27 | 0.99 | 1.17 | 1.01 | 1.20 | 0.91 | 1.08 | 26.58 | 5.45 |
| Q80ZJ7 | Sorting nexin-32 OS=Mus musculus GN=Snx32 PE=2 SV=1 - [SNX32_MOUSE]                                       | 5.20  | 1 | 1  | 3  | 7   | 1.09 | 1.39 | 1.27 | 1.12 | 1.02 | 1.02 | 0.93 | 0.99 | 0.90 | 1.00 | 0.92 | 1.27 | 1.16 | 46.62 | 6.96 |
| D3YXA6 | Tripartite motif-containing protein 46 OS=Mus musculus GN=Trim46 PE=2 SV=1 - [D3YXA6_MOUSE]               | 9.65  | 5 | 5  | 5  | 9   | 0.96 | 1.12 | 1.25 | 1.13 | 1.12 | 0.99 | 1.16 | 0.99 | 1.12 | 0.95 | 1.05 | 1.03 | 1.17 | 80.86 | 7.87 |
| Q60649 | Caseolytic peptidase B protein homolog OS=Mus musculus GN=Clpb PE=1 SV=1 - [CLPB_MOUSE]                   | 8.71  | 4 | 5  | 5  | 11  | 1.03 | 1.20 | 1.23 | 0.99 | 0.99 | 1.01 | 0.99 | 0.99 | 0.96 | 1.05 | 1.04 | 1.15 | 1.06 | 75.96 | 8.51 |
| Q60829 | Protein phosphatase 1 regulatory subunit 1B OS=Mus musculus GN=Ppp1r1b PE=1 SV=2 - [PPR1B_MOUSE]          | 71.13 | 2 | 9  | 9  | 310 | 0.96 | 1.00 | 1.04 | 0.91 | 0.93 | 1.07 | 1.08 | 0.99 | 1.02 | 1.09 | 1.20 | 1.26 | 1.30 | 21.77 | 4.65 |
| B1AS04 | Protein LZIC (Fragment) OS=Mus musculus GN=Lzic PE=2 SV=1 - [B1AS04_MOUSE]                                | 40.00 | 2 | 1  | 4  | 10  | 1.31 | 0.82 | 0.63 | 1.02 | 0.77 | 1.03 | 0.78 | 0.99 | 0.75 | 0.87 | 0.66 | 0.97 | 0.74 | 7.72  | 4.51 |
| Q80TN4 | Dnaj homolog subfamily C member 16 OS=Mus musculus GN=Dnaj16 PE=1 SV=2 - [DJC16_MOUSE]                    | 1.42  | 1 | 1  | 1  | 1   | 1.18 | 1.05 | 0.89 | 1.59 | 1.36 | 1.34 | 1.13 | 0.99 | 0.84 | 0.81 | 0.69 | 1.24 | 1.06 | 89.08 | 7.55 |
| Q60902 | Epidermal growth factor receptor substrate 15-like 1 OS=Mus musculus GN=Eps15l1 PE=1 SV=3 - [EPI5R_MOUSE] | 48.62 | 3 | 4  | 33 | 96  | 1.01 | 0.91 | 0.79 | 1.05 | 1.06 | 1.06 | 1.05 | 0.99 | 1.03 | 0.91 | 0.93 | 0.89 | 0.79 | 99.25 | 5.02 |
| Q9CQV8 | Isoform Short of 14-3-3 protein beta/alpha OS=Mus musculus GN=Ywhab - [1433B_MOUSE]                       | 74.59 | 5 | 9  | 19 | 550 | 0.98 | 0.96 | 0.97 | 1.00 | 1.00 | 1.00 | 0.99 | 0.99 | 1.00 | 0.95 | 0.93 | 0.99 | 1.01 | 27.84 | 4.83 |
| Q9DB77 | Cytochrome b-c1 complex subunit 2, mitochondrial OS=Mus musculus GN=Uqerc2 PE=1 SV=1 - [QCR2_MOUSE]       | 60.26 | 1 | 21 | 21 | 207 | 1.01 | 1.05 | 1.01 | 1.05 | 1.02 | 1.00 | 0.98 | 0.99 | 0.97 | 1.03 | 0.97 | 1.04 | 1.03 | 48.21 | 9.25 |
| Q8K4Z3 | NAD(P)H-hydrate epimerase OS=Mus musculus GN=Apoa1bp PE=1 SV=1 - [NNRE_MOUSE]                             | 36.52 | 1 | 8  | 8  | 28  | 0.95 | 0.84 | 0.87 | 1.09 | 1.11 | 1.11 | 1.11 | 0.99 | 1.11 | 1.10 | 1.12 | 1.04 | 1.09 | 30.95 | 7.69 |

|          |                                                                                                                    |       |    |    |    |      |      |      |      |      |      |      |      |      |      |      |      |      |      |        |       |
|----------|--------------------------------------------------------------------------------------------------------------------|-------|----|----|----|------|------|------|------|------|------|------|------|------|------|------|------|------|------|--------|-------|
| Q64442   | Sorbitol dehydrogenase<br>OS=Mus musculus<br>GN=Sord PE=1 SV=3 -<br>[DHSO_MOUSE]                                   | 28.57 | 1  | 8  | 8  | 16   | 1.03 | 0.96 | 0.88 | 0.99 | 0.94 | 0.97 | 0.86 | 0.99 | 0.92 | 0.95 | 0.92 | 0.97 | 0.88 | 38.22  | 7.02  |
| P60710   | Actin, cytoplasmic 1<br>OS=Mus musculus<br>GN=Actb PE=1 SV=1 -<br>[ACTB_MOUSE]                                     | 84.27 | 11 | 9  | 29 | 1484 | 1.01 | 1.03 | 1.02 | 1.07 | 1.04 | 1.00 | 0.99 | 0.99 | 0.96 | 1.00 | 0.98 | 1.05 | 1.04 | 41.71  | 5.48  |
| E9Q1G8   | Septin-7 OS=Mus<br>musculus GN=Sept7<br>PE=3 SV=2 -<br>[E9Q1G8_MOUSE]                                              | 61.56 | 3  | 29 | 32 | 480  | 0.95 | 0.89 | 0.90 | 0.98 | 1.01 | 0.98 | 1.02 | 0.99 | 1.05 | 0.94 | 1.01 | 0.93 | 0.97 | 50.62  | 8.57  |
| A2A4H9   | Peptidyl-prolyl cis-<br>trans isomerase<br>FKBP10 OS=Mus<br>musculus GN=Fkbp10<br>PE=2 SV=1 -<br>[A2A4H9_MOUSE]    | 2.35  | 2  | 1  | 1  | 1    | 0.96 | 1.03 | 1.06 | 0.57 | 0.59 | 0.79 | 0.82 | 0.99 | 1.03 | 0.76 | 0.79 | 0.83 | 0.86 | 52.30  | 5.53  |
| Q8VD65   | Phosphoinositide 3-<br>kinase regulatory<br>subunit 4 OS=Mus<br>musculus GN=Pik3r4<br>PE=1 SV=3 -<br>[P13R4_MOUSE] | 2.95  | 1  | 3  | 3  | 4    | 1.08 | 1.01 | 0.90 | 1.08 | 1.00 | 0.91 | 0.84 | 1.00 | 0.92 | 0.95 | 0.89 | 1.07 | 0.95 | 152.50 | 7.12  |
| Q6PFR5   | Transformer-2 protein<br>homolog alpha<br>OS=Mus musculus<br>GN=Tra2a PE=1 SV=1 -<br>[TRA2A_MOUSE]                 | 13.88 | 2  | 3  | 4  | 12   | 0.96 | 0.89 | 0.92 | 0.90 | 1.00 | 0.82 | 0.85 | 1.00 | 0.91 | 0.90 | 0.82 | 0.91 | 0.94 | 32.30  | 11.28 |
| Q9JL26-2 | Isoform 2 of Formin-<br>like protein 1 OS=Mus<br>musculus GN=Fmn1 -<br>[FMNL_MOUSE]                                | 7.33  | 3  | 1  | 6  | 16   | 1.00 | 0.87 | 0.87 | 0.92 | 0.92 | 0.77 | 0.77 | 1.00 | 0.99 | 0.96 | 0.96 | 1.11 | 1.11 | 118.96 | 5.66  |
| F7CWH3   | Inositol<br>hexakisphosphate<br>kinase 1 OS=Mus<br>musculus GN=Ipk1<br>PE=2 SV=1 -<br>[F7CWH3_MOUSE]               | 13.54 | 3  | 1  | 1  | 1    | 1.05 | 0.95 | 0.91 | 1.01 | 0.97 | 1.02 | 0.97 | 1.00 | 0.95 | 0.87 | 0.83 | 0.89 | 0.85 | 11.17  | 8.63  |
| D3Z5W7   | Glutathione S-<br>transferase theta-1<br>(Fragment) OS=Mus<br>musculus GN=Gstt1<br>PE=2 SV=1 -<br>[D3Z5W7_MOUSE]   | 10.32 | 3  | 1  | 1  | 2    | 1.41 | 0.92 | 0.66 | 1.03 | 0.73 | 0.90 | 0.63 | 1.00 | 0.71 | 1.24 | 0.88 | 1.35 | 0.96 | 14.46  | 6.27  |
| Q3U1Z5-2 | Isoform 2 of G-protein-<br>signaling modulator 3<br>OS=Mus musculus<br>GN=Gpsm3 -<br>[GPSM3_MOUSE]                 | 14.88 | 2  | 1  | 1  | 3    | 0.85 | 0.92 | 1.08 | 0.89 | 1.05 | 0.94 | 1.10 | 1.00 | 1.17 | 0.94 | 1.10 | 0.91 | 1.07 | 13.48  | 4.94  |
| P14152   | Malate dehydrogenase,<br>cytoplasmic OS=Mus<br>musculus GN=Mdh1<br>PE=1 SV=3 -<br>[MDHC_MOUSE]                     | 55.69 | 3  | 20 | 20 | 228  | 0.97 | 0.94 | 0.94 | 1.03 | 1.05 | 1.01 | 1.01 | 1.00 | 1.02 | 1.00 | 1.02 | 1.00 | 1.02 | 36.49  | 6.58  |
| Q91WJ8   | Far upstream element-<br>binding protein 1<br>OS=Mus musculus<br>GN=Fubp1 PE=1<br>SV=1 -<br>[FUBP1_MOUSE]          | 48.54 | 2  | 2  | 23 | 201  | 1.05 | 0.91 | 0.87 | 1.06 | 0.99 | 0.99 | 1.01 | 1.00 | 1.02 | 1.00 | 1.01 | 0.98 | 0.93 | 68.50  | 7.93  |

|          |                                                                                                                |       |    |    |    |    |      |      |      |      |      |      |      |      |      |      |      |      |      |        |       |
|----------|----------------------------------------------------------------------------------------------------------------|-------|----|----|----|----|------|------|------|------|------|------|------|------|------|------|------|------|------|--------|-------|
| Q8VC85   | U6 snRNA-associated Sm-like protein Lsm1 OS=Mus musculus GN=Lsm1 PE=2 SV=1 - [LSM1_MOUSE]                      | 36.09 | 1  | 4  | 4  | 8  | 1.00 | 1.06 | 0.95 | 0.96 | 0.93 | 1.02 | 0.99 | 1.00 | 0.99 | 0.97 | 0.95 | 1.11 | 0.99 | 15.23  | 5.38  |
| E9PX61   | Protein Gm15800 OS=Mus musculus GN=Gm15800 PE=2 SV=1 - [E9PX61_MOUSE]                                          | 1.53  | 2  | 5  | 5  | 8  | 0.93 | 1.08 | 1.25 | 0.95 | 1.03 | 0.90 | 0.97 | 1.00 | 0.97 | 0.88 | 0.96 | 0.87 | 1.11 | 452.28 | 6.18  |
| P62245   | 40S ribosomal protein S15a OS=Mus musculus GN=Rps15a PE=2 SV=2 - [RS15A_MOUSE]                                 | 53.08 | 4  | 6  | 6  | 15 | 1.11 | 1.07 | 1.01 | 1.05 | 1.01 | 0.96 | 1.01 | 1.00 | 0.95 | 1.00 | 1.04 | 1.11 | 1.07 | 14.83  | 10.13 |
| Q9DCS3   | Trans-2-enoyl-CoA reductase, mitochondrial OS=Mus musculus GN=Mecr PE=2 SV=2 - [MECR_MOUSE]                    | 41.29 | 2  | 7  | 7  | 11 | 0.83 | 1.03 | 1.18 | 1.11 | 1.27 | 1.15 | 1.26 | 1.00 | 1.19 | 1.15 | 1.31 | 1.10 | 1.39 | 40.32  | 9.07  |
| Q8VI75   | Importin-4 OS=Mus musculus GN=Ipo4 PE=1 SV=1 - [IPO4_MOUSE]                                                    | 5.27  | 3  | 5  | 5  | 7  | 1.11 | 1.29 | 1.16 | 1.24 | 1.09 | 0.99 | 0.88 | 1.00 | 0.85 | 1.06 | 1.00 | 1.07 | 0.97 | 119.20 | 5.03  |
| B1AU41   | Alpha-1B adrenergic receptor (Fragment) OS=Mus musculus GN=Adra1b PE=2 SV=1 - [B1AU41_MOUSE]                   | 2.81  | 2  | 1  | 1  | 1  | 0.77 | 1.07 | 1.39 | 1.04 | 1.35 | 0.91 | 1.18 | 1.00 | 1.29 | 0.97 | 1.26 | 0.99 | 1.29 | 51.09  | 9.54  |
| Q8C3P7   | N6-adenosine-methyltransferase 70 kDa subunit OS=Mus musculus GN=Mett13 PE=2 SV=2 - [MTA70_MOUSE]              | 3.97  | 5  | 2  | 2  | 4  | 1.02 | 1.09 | 1.15 | 0.97 | 1.03 | 1.09 | 1.06 | 1.00 | 1.05 | 0.98 | 0.99 | 1.02 | 1.01 | 64.58  | 6.49  |
| A8XY17   | Vacuolar protein-sorting-associated protein 25 OS=Mus musculus GN=Vps25 PE=2 SV=1 - [A8XY17_MOUSE]             | 19.53 | 6  | 2  | 2  | 4  | 1.20 | 0.89 | 0.74 | 1.22 | 1.02 | 1.07 | 0.88 | 1.00 | 0.83 | 1.03 | 0.86 | 1.20 | 1.01 | 14.95  | 5.17  |
| O70161-3 | Isoform 3 of Phosphatidylinositol 4-phosphate 5-kinase type-1 gamma OS=Mus musculus GN=Pip5k1c - [PI51C_MOUSE] | 36.06 | 9  | 16 | 17 | 89 | 0.97 | 0.99 | 1.00 | 1.01 | 1.03 | 1.05 | 1.06 | 1.00 | 1.06 | 1.03 | 1.05 | 0.98 | 0.99 | 69.46  | 5.73  |
| Q91V57-3 | Isoform 3 of N-chimaerin OS=Mus musculus GN=Chn1 - [CHIN_MOUSE]                                                | 19.05 | 6  | 3  | 3  | 7  | 0.95 | 1.25 | 1.32 | 1.04 | 1.10 | 1.06 | 1.15 | 1.00 | 1.07 | 1.06 | 1.16 | 1.03 | 1.09 | 24.08  | 5.49  |
| P35279   | Ras-related protein Rab6A OS=Mus musculus GN=Rab6a PE=1 SV=4 - [RAB6A_MOUSE]                                   | 45.67 | 12 | 5  | 9  | 75 | 1.10 | 1.24 | 1.15 | 1.02 | 0.91 | 0.92 | 0.83 | 1.00 | 0.84 | 1.01 | 0.90 | 1.05 | 0.91 | 23.57  | 5.54  |
| Q6V4S5   | Protein sidekick-2 OS=Mus musculus GN=Sdk2 PE=2 SV=1 - [SDK2_MOUSE]                                            | 6.30  | 4  | 10 | 10 | 26 | 1.04 | 1.08 | 1.00 | 1.04 | 1.01 | 0.91 | 0.87 | 1.00 | 0.96 | 0.97 | 0.91 | 0.97 | 0.93 | 239.75 | 7.36  |



|          |                                                                                                          |       |   |    |    |      |      |      |      |      |      |      |      |      |      |      |      |      |      |        |      |
|----------|----------------------------------------------------------------------------------------------------------|-------|---|----|----|------|------|------|------|------|------|------|------|------|------|------|------|------|------|--------|------|
| A2RSJ4   | UHRF1-binding protein 1-like OS=Mus musculus GN=Uhrf1bp1 PE=2 SV=2 - [UH1BL_MOUSE]                       | 7.28  | 1 | 7  | 8  | 14   | 0.86 | 1.02 | 1.14 | 0.98 | 1.19 | 1.18 | 1.36 | 1.00 | 1.15 | 1.15 | 1.33 | 1.03 | 1.11 | 161.84 | 6.61 |
| Q8VDQ8   | NAD-dependent protein deacetylase sirtuin-2 OS=Mus musculus GN=Sirt2 PE=1 SV=2 - [SIR2_MOUSE]            | 62.72 | 3 | 19 | 19 | 110  | 0.94 | 0.96 | 1.05 | 1.09 | 1.16 | 1.00 | 1.06 | 1.00 | 1.05 | 0.94 | 1.01 | 0.95 | 1.06 | 43.23  | 5.35 |
| Q8K310   | Matrin-3 OS=Mus musculus GN=Matr3 PE=1 SV=1 - [MATR3_MOUSE]                                              | 33.45 | 1 | 21 | 21 | 61   | 0.94 | 1.02 | 1.05 | 0.99 | 1.02 | 1.03 | 1.11 | 1.00 | 1.07 | 0.99 | 1.02 | 1.07 | 1.14 | 94.57  | 6.25 |
| G3X909   | Slit homolog 2 protein OS=Mus musculus GN=Slit2 PE=2 SV=1 - [G3X909_MOUSE]                               | 3.41  | 6 | 2  | 2  | 4    | 1.07 | 1.22 | 1.13 | 1.01 | 0.94 | 0.96 | 0.89 | 1.00 | 0.93 | 0.95 | 0.89 | 1.03 | 0.96 | 95.43  | 8.54 |
| Q9CXU9   | Eukaryotic translation initiation factor 1b OS=Mus musculus GN=Eif1b PE=2 SV=2 - [EIF1B_MOUSE]           | 61.06 | 5 | 1  | 6  | 63   | 1.02 | 0.68 | 0.67 | 0.87 | 0.86 | 0.92 | 0.91 | 1.00 | 0.98 | 0.69 | 0.68 | 0.83 | 0.81 | 12.82  | 7.37 |
| Q9CWF2   | Tubulin beta-2B chain OS=Mus musculus GN=Tubb2b PE=1 SV=1 - [TBB2B_MOUSE]                                | 74.38 | 2 | 1  | 28 | 1881 | 1.07 | 0.82 | 0.81 | 1.08 | 1.02 | 1.09 | 0.92 | 1.00 | 0.94 | 1.14 | 1.05 | 1.12 | 1.07 | 49.92  | 4.89 |
| Q8K440-2 | Isoform 2 of ATP-binding cassette sub-family A member 8-B OS=Mus musculus GN=Abca8b - [ABC8B_MOUSE]      | 0.83  | 2 | 1  | 1  | 2    | 0.82 | 1.39 | 1.69 | 1.01 | 1.23 | 0.87 | 1.05 | 1.00 | 1.21 | 0.85 | 1.04 | 0.86 | 1.05 | 176.05 | 7.03 |
| B2RQ71   | Dip2c protein OS=Mus musculus GN=Dip2c PE=2 SV=1 - [B2RQ71_MOUSE]                                        | 13.24 | 2 | 1  | 15 | 35   | 1.06 | 1.27 | 1.20 | 0.99 | 0.94 | 0.95 | 0.90 | 1.00 | 0.94 | 1.02 | 0.97 | 0.97 | 0.92 | 170.81 | 7.39 |
| F6QP10   | Sn1-specific diacylglycerol lipase beta (Fragment) OS=Mus musculus GN=Daglb PE=4 SV=2 - [F6QP10_MOUSE]   | 1.53  | 2 | 1  | 1  | 1    | 0.93 | 1.30 | 1.39 | 1.20 | 1.28 | 1.38 | 1.47 | 1.00 | 1.06 | 1.02 | 1.09 | 1.27 | 1.36 | 64.62  | 6.44 |
| O08908   | Phosphatidylinositol 3-kinase regulatory subunit beta OS=Mus musculus GN=Pik3r2 PE=1 SV=2 - [P85B_MOUSE] | 7.62  | 1 | 3  | 3  | 6    | 0.95 | 1.14 | 1.20 | 1.07 | 1.06 | 1.04 | 1.09 | 1.00 | 0.99 | 1.00 | 1.03 | 1.01 | 1.00 | 81.22  | 6.07 |
| Q63829   | COMM domain-containing protein 3 OS=Mus musculus GN=Comm3 PE=2 SV=1 - [COMD3_MOUSE]                      | 5.64  | 1 | 1  | 1  | 1    | 0.99 | 0.82 | 0.83 | 0.96 | 0.97 | 1.22 | 1.22 | 1.00 | 1.00 | 1.25 | 1.27 | 1.12 | 1.13 | 22.02  | 5.59 |

|          |                                                                                                                         |       |   |   |    |    |      |      |      |      |      |      |      |      |      |      |      |      |      |       |       |
|----------|-------------------------------------------------------------------------------------------------------------------------|-------|---|---|----|----|------|------|------|------|------|------|------|------|------|------|------|------|------|-------|-------|
| P70697   | Uroporphyrinogen decarboxylase<br>OS=Mus musculus<br>GN=Urod PE=1 SV=2 -<br>[DCUP_MOUSE]                                | 14.99 | 1 | 4 | 4  | 6  | 0.77 | 1.01 | 1.23 | 1.11 | 1.24 | 0.96 | 1.04 | 1.00 | 1.21 | 1.12 | 1.22 | 1.04 | 1.18 | 40.67 | 6.65  |
| Q8BTE5   | Protein<br>1110001A16Rik<br>OS=Mus musculus<br>GN=1110001A16Rik<br>PE=4 SV=2 -<br>[Q8BTE5_MOUSE]                        | 13.75 | 1 | 1 | 1  | 2  | 1.04 | 0.84 | 0.81 | 0.91 | 0.87 | 0.98 | 0.94 | 1.00 | 0.96 | 1.01 | 0.98 | 1.06 | 1.02 | 9.28  | 9.45  |
| D3YZT4   | Sphingosine-1-phosphate lyase 1 (Fragment)<br>OS=Mus musculus GN=Sgp1<br>PE=2 SV=1 -<br>[D3YZT4_MOUSE]                  | 7.54  | 3 | 1 | 1  | 3  | 0.99 | 1.14 | 1.16 | 1.30 | 1.31 | 0.93 | 0.93 | 1.00 | 1.00 | 1.01 | 1.02 | 1.06 | 1.07 | 22.96 | 8.84  |
| P28659-2 | Isoform 2 of CUGBP Elav-like family member 1<br>OS=Mus musculus GN=Celf1 -<br>[CELF1_MOUSE]                             | 10.79 | 4 | 3 | 4  | 7  | 0.92 | 1.12 | 1.15 | 1.00 | 1.08 | 0.96 | 1.06 | 1.00 | 1.08 | 0.99 | 1.11 | 1.12 | 1.21 | 51.56 | 8.47  |
| A2A547   | 60S ribosomal protein L19<br>OS=Mus musculus GN=Rpl19<br>PE=2 SV=1 -<br>[A2A547_MOUSE]                                  | 17.53 | 2 | 5 | 5  | 14 | 1.06 | 0.90 | 0.92 | 1.16 | 1.09 | 1.03 | 1.11 | 1.00 | 0.98 | 1.05 | 1.07 | 1.00 | 1.06 | 23.23 | 11.47 |
| Q7TMW6   | Cytosolic Fe-S cluster assembly factor NARFL<br>OS=Mus musculus GN=Narfl<br>PE=2 SV=2 -<br>[NARFL_MOUSE]                | 10.71 | 2 | 4 | 4  | 6  | 0.99 | 1.21 | 1.19 | 1.09 | 1.04 | 0.95 | 0.94 | 1.00 | 1.01 | 1.06 | 1.07 | 1.03 | 1.01 | 53.07 | 6.48  |
| Q9CX00   | IST1 homolog<br>OS=Mus musculus GN=Ist1 PE=2 SV=1 -<br>[IST1_MOUSE]                                                     | 15.75 | 1 | 6 | 6  | 8  | 1.06 | 0.93 | 0.91 | 0.98 | 0.94 | 0.88 | 0.92 | 1.00 | 0.95 | 0.97 | 0.94 | 0.95 | 0.99 | 39.44 | 5.44  |
| Q9JF78   | Peptide-N(4)-(N-acetyl-beta-glucosaminyl)asparagine amidase<br>OS=Mus musculus GN=Ngly1<br>PE=1 SV=2 -<br>[NGLY1_MOUSE] | 5.38  | 1 | 3 | 3  | 4  | 0.94 | 1.17 | 1.15 | 0.93 | 0.99 | 0.98 | 1.03 | 1.00 | 0.96 | 1.03 | 1.04 | 1.04 | 1.10 | 74.23 | 6.89  |
| Q61584-6 | Isoform F of Fragile X mental retardation syndrome-related protein 1<br>OS=Mus musculus GN=Fxrl -<br>[FXR1_MOUSE]       | 22.38 | 7 | 8 | 11 | 19 | 1.01 | 1.06 | 1.09 | 1.05 | 1.01 | 1.02 | 0.94 | 1.00 | 0.91 | 1.06 | 0.97 | 1.01 | 0.96 | 73.08 | 6.98  |
| Q99LD7   | E3 ubiquitin-protein ligase makorin-1<br>OS=Mus musculus GN=Mkm1 PE=2 SV=1 -<br>[Q99LD7_MOUSE]                          | 6.38  | 7 | 2 | 2  | 3  | 1.00 | 0.75 | 0.74 | 0.86 | 0.85 | 1.09 | 1.08 | 1.00 | 0.99 | 0.92 | 0.91 | 0.83 | 0.83 | 34.94 | 6.51  |
| A2BG18   | Peptidyl-prolyl cis-trans isomerase H (Fragment)<br>OS=Mus musculus GN=Pp1h<br>PE=2 SV=1 -<br>[A2BG18_MOUSE]            | 28.48 | 5 | 3 | 4  | 13 | 1.09 | 1.13 | 1.04 | 1.06 | 1.07 | 1.06 | 0.96 | 1.00 | 0.98 | 0.97 | 0.99 | 0.96 | 0.97 | 17.22 | 8.34  |

|          |                                                                                                           |       |   |    |    |     |      |      |      |      |      |      |      |      |      |      |      |      |      |        |      |
|----------|-----------------------------------------------------------------------------------------------------------|-------|---|----|----|-----|------|------|------|------|------|------|------|------|------|------|------|------|------|--------|------|
| P35436   | Glutamate receptor ionotropic, NMDA 2A OS=Mus musculus GN=Grin2a PE=1 SV=2 - [NMDE1_MOUSE]                | 9.08  | 1 | 9  | 9  | 16  | 0.95 | 0.97 | 1.08 | 1.03 | 1.11 | 0.90 | 0.93 | 1.00 | 1.01 | 0.91 | 0.95 | 0.93 | 0.90 | 165.32 | 7.01 |
| E9Q6X0   | Microtubule-associated protein RP/EB family member 2 OS=Mus musculus GN=Mapre2 PE=2 SV=1 - [E9Q6X0_MOUSE] | 62.32 | 5 | 12 | 14 | 43  | 0.96 | 1.00 | 1.11 | 1.03 | 1.06 | 0.94 | 1.00 | 1.00 | 1.01 | 1.05 | 1.07 | 0.97 | 1.10 | 32.24  | 5.26 |
| Q6X893   | Choline transporter-like protein 1 OS=Mus musculus GN=Slc44a1 PE=1 SV=3 - [CTL1_MOUSE]                    | 10.41 | 6 | 5  | 5  | 10  | 0.99 | 1.27 | 1.16 | 1.10 | 0.98 | 0.91 | 0.96 | 1.00 | 0.91 | 1.10 | 1.07 | 1.12 | 1.23 | 73.02  | 8.75 |
| Q8BG58   | Transmembrane prolyl 4-hydroxylase OS=Mus musculus GN=P4htm PE=2 SV=1 - [P4HTM_MOUSE]                     | 5.77  | 1 | 2  | 2  | 4   | 0.99 | 1.17 | 1.18 | 1.12 | 1.13 | 1.22 | 1.22 | 1.00 | 1.00 | 1.07 | 1.08 | 1.07 | 1.08 | 57.01  | 6.09 |
| Q9D967   | Magnesium-dependent phosphatase 1 OS=Mus musculus GN=Mdp1 PE=1 SV=1 - [MGDP1_MOUSE]                       | 54.27 | 1 | 6  | 6  | 14  | 0.99 | 0.86 | 0.93 | 0.91 | 0.97 | 0.96 | 0.96 | 1.00 | 1.00 | 0.96 | 0.90 | 0.95 | 0.96 | 18.57  | 6.80 |
| Q6ZQ93   | Isoform 4 of Ubiquitin carboxyl-terminal hydrolase 34 OS=Mus musculus GN=Usp34 - [UBP34_MOUSE]            | 1.82  | 7 | 2  | 2  | 12  | 0.92 | 0.71 | 0.77 | 0.92 | 1.01 | 0.99 | 1.08 | 1.00 | 1.09 | 0.99 | 1.09 | 0.87 | 0.96 | 275.37 | 5.52 |
| Q91XW9   | MC1G133388, isoform CRA_f OS=Mus musculus GN=Pedhg5 PE=2 SV=1 - [Q91XW9_MOUSE]                            | 9.85  | 5 | 4  | 6  | 23  | 0.88 | 1.09 | 1.23 | 1.03 | 1.17 | 1.14 | 1.21 | 1.00 | 1.19 | 1.07 | 1.21 | 0.93 | 1.06 | 101.83 | 5.27 |
| Q8BTW3   | Exosome complex component MTR3 OS=Mus musculus GN=Exosc6 PE=1 SV=1 - [EXOS6_MOUSE]                        | 5.49  | 1 | 1  | 1  | 2   | 0.98 | 0.91 | 0.93 | 0.92 | 0.93 | 1.04 | 1.06 | 1.00 | 1.01 | 0.99 | 1.01 | 0.95 | 0.96 | 28.35  | 6.11 |
| G5E924   | Heterogeneous nuclear ribonucleoprotein L (Fragment) OS=Mus musculus GN=Hnmp1 PE=4 SV=1 - [G5E924_MOUSE]  | 42.11 | 5 | 16 | 16 | 111 | 0.91 | 0.95 | 0.98 | 0.96 | 1.02 | 0.96 | 1.07 | 1.00 | 1.07 | 0.94 | 0.99 | 0.93 | 1.00 | 66.89  | 8.18 |
| O88413   | Tubby-related protein 3 OS=Mus musculus GN=Tulp3 PE=1 SV=1 - [TULP3_MOUSE]                                | 2.39  | 1 | 1  | 1  | 2   | 0.95 | 1.18 | 1.24 | 0.85 | 0.90 | 0.96 | 1.01 | 1.00 | 1.05 | 1.02 | 1.07 | 0.99 | 1.05 | 51.20  | 6.24 |
| Q61137-2 | Isoform 2 of Astrotactin-1 OS=Mus musculus GN=Astn1 - [ASTN1_MOUSE]                                       | 24.81 | 3 | 23 | 23 | 58  | 1.03 | 0.99 | 0.98 | 1.02 | 1.01 | 0.97 | 0.97 | 1.00 | 0.97 | 0.97 | 0.98 | 0.94 | 0.91 | 143.86 | 5.15 |

|          |                                                                                                                                                    |       |   |    |    |    |      |      |      |      |      |      |      |      |      |      |      |      |      |       |      |
|----------|----------------------------------------------------------------------------------------------------------------------------------------------------|-------|---|----|----|----|------|------|------|------|------|------|------|------|------|------|------|------|------|-------|------|
| Q5DU31-  | Isoform 2 of Interactor protein for cytohesin exchange factors 1 OS=Mus musculus GN=Ipcf1 - [ICEF1_MOUSE]                                          | 25.61 | 6 | 9  | 9  | 29 | 0.97 | 0.91 | 0.92 | 0.94 | 0.99 | 1.03 | 1.02 | 1.00 | 1.07 | 0.90 | 0.93 | 0.84 | 0.86 | 46.25 | 6.73 |
| G3X8S2   | BRF1 homolog, subunit of RNA polymerase III transcription initiation factor IIB (S. cerevisiae) OS=Mus musculus GN=Brf1 PE=4 SV=1 - [G3X8S2_MOUSE] | 1.63  | 2 | 1  | 1  | 2  | 1.08 | 0.94 | 0.87 | 0.99 | 0.91 | 1.08 | 0.99 | 1.00 | 0.92 | 1.10 | 1.02 | 1.03 | 0.95 | 73.76 | 5.30 |
| Q91ZM2-  | Isoform 5 of SH2B adapter protein 1 OS=Mus musculus GN=Sh2b1 - [SH2B1_MOUSE]                                                                       | 17.83 | 6 | 5  | 5  | 9  | 1.05 | 0.81 | 1.04 | 1.06 | 1.04 | 1.01 | 1.08 | 1.00 | 1.12 | 1.04 | 1.05 | 1.03 | 1.12 | 46.36 | 6.09 |
| Q8R3L2-3 | Isoform 3 of Transcription factor 25 OS=Mus musculus GN=Trf25 - [TCF25_MOUSE]                                                                      | 8.35  | 5 | 3  | 3  | 17 | 0.96 | 0.99 | 1.09 | 0.99 | 1.02 | 0.89 | 0.87 | 1.00 | 1.03 | 0.80 | 0.81 | 0.94 | 0.97 | 69.26 | 7.25 |
| P55144-3 | Isoform 1 of Tyrosine-protein kinase receptor TYRO3 OS=Mus musculus GN=Tyro3 - [TYRO3_MOUSE]                                                       | 8.79  | 3 | 5  | 6  | 13 | 0.98 | 1.27 | 1.27 | 1.03 | 1.06 | 0.94 | 0.98 | 1.00 | 1.02 | 1.03 | 1.08 | 1.03 | 1.07 | 95.98 | 5.60 |
| Q924S7   | Sprouty-related, EVH1 domain-containing protein 2 OS=Mus musculus GN=Spred2 PE=1 SV=1 - [SPRE2_MOUSE]                                              | 10.24 | 3 | 2  | 3  | 5  | 0.92 | 1.16 | 1.27 | 0.92 | 1.01 | 0.99 | 1.08 | 1.00 | 1.09 | 1.10 | 1.20 | 0.90 | 0.99 | 46.76 | 6.81 |
| A2A9Z1   | Dystrophin OS=Mus musculus GN=Dmd PE=2 SV=1 - [A2A9Z1_MOUSE]                                                                                       | 17.55 | 5 | 7  | 8  | 33 | 1.00 | 1.14 | 1.05 | 0.98 | 1.01 | 1.12 | 1.06 | 1.00 | 1.07 | 1.04 | 1.05 | 0.92 | 0.94 | 68.88 | 6.62 |
| Q3UFS0-2 | Isoform 2 of Protein zyg-11 homolog B OS=Mus musculus GN=Zyg11b - [ZY11B_MOUSE]                                                                    | 3.36  | 3 | 1  | 1  | 1  | 0.92 | 0.97 | 1.05 | 0.89 | 0.96 | 0.81 | 0.87 | 1.00 | 1.08 | 0.80 | 0.87 | 1.10 | 1.19 | 50.07 | 7.20 |
| Q9CR26   | Vacuolar protein sorting-associated protein VTA1 homolog OS=Mus musculus GN=Vta1 PE=1 SV=1 - [VTA1_MOUSE]                                          | 12.30 | 2 | 3  | 3  | 6  | 0.91 | 0.98 | 1.05 | 0.94 | 1.00 | 1.02 | 1.11 | 1.00 | 1.10 | 1.02 | 1.09 | 1.07 | 1.14 | 33.89 | 6.13 |
| P63080   | Gamma-aminobutyric acid receptor subunit beta-3 OS=Mus musculus GN=Gabrb3 PE=2 SV=1 - [GBRB3_MOUSE]                                                | 21.99 | 3 | 4  | 7  | 29 | 0.99 | 1.24 | 1.14 | 1.13 | 1.15 | 0.93 | 0.90 | 1.00 | 1.01 | 0.99 | 1.02 | 1.11 | 0.91 | 54.13 | 9.10 |
| Q3TEA8-  | Isoform 2 of Heterochromatin protein 1-binding protein 3 OS=Mus musculus GN=Hp1bp3 - [HP1B3_MOUSE]                                                 | 21.44 | 8 | 10 | 10 | 46 | 0.99 | 0.77 | 0.77 | 1.00 | 1.03 | 1.10 | 1.13 | 1.00 | 0.98 | 1.05 | 1.05 | 1.01 | 1.03 | 59.51 | 9.79 |

|          |                                                                                                                      |       |   |    |    |     |      |      |      |      |      |       |       |      |      |      |      |      |      |        |      |
|----------|----------------------------------------------------------------------------------------------------------------------|-------|---|----|----|-----|------|------|------|------|------|-------|-------|------|------|------|------|------|------|--------|------|
| Q9WVB0   | RNA-binding protein with multiple splicing OS=Mus musculus GN=Rbpms PE=2 SV=2 - [RBPMS_MOUSE]                        | 7.61  | 2 | 1  | 1  | 5   | 1.09 | 1.28 | 1.17 | 0.93 | 0.85 | 1.05  | 0.96  | 1.00 | 0.91 | 1.00 | 0.92 | 1.00 | 0.94 | 21.80  | 8.07 |
| Q61301-2 | Isoform 2 of Catenin alpha-2 OS=Mus musculus GN=Ctnna2 - [CTNA2_MOUSE]                                               | 40.44 | 5 | 22 | 29 | 94  | 0.98 | 1.02 | 1.08 | 1.05 | 1.14 | 0.89  | 0.93  | 1.00 | 0.98 | 0.96 | 1.03 | 1.00 | 1.02 | 100.36 | 5.96 |
| P35564   | Calnexin OS=Mus musculus GN=Canx PE=1 SV=1 - [CALX_MOUSE]                                                            | 35.87 | 1 | 20 | 20 | 122 | 1.01 | 0.97 | 0.97 | 1.04 | 1.03 | 1.06  | 1.04  | 1.00 | 0.99 | 1.03 | 1.02 | 1.01 | 1.00 | 67.24  | 4.64 |
| G3UWG1   | MCG115977 OS=Mus musculus GN=Gm10108 PE=3 SV=1 - [G3UWG1_MOUSE]                                                      | 63.81 | 2 | 10 | 12 | 495 | 1.03 | 0.82 | 0.80 | 0.92 | 0.89 | 0.94  | 0.92  | 1.00 | 0.98 | 0.92 | 0.91 | 0.87 | 0.84 | 11.69  | 9.64 |
| Q5SX39   | Myosin-4 OS=Mus musculus GN=Myh4 PE=1 SV=1 - [MYH4_MOUSE]                                                            | 39.50 | 3 | 17 | 65 | 208 | 1.00 | 1.21 | 1.13 | 0.98 | 0.91 | 10.37 | 11.11 | 1.00 | 1.09 | 1.15 | 1.09 | 1.08 | 1.07 | 222.72 | 5.74 |
| Q9R0N3   | Synaptotagmin-11 OS=Mus musculus GN=Syt11 PE=2 SV=2 - [SYT11_MOUSE]                                                  | 10.23 | 1 | 3  | 3  | 5   | 1.15 | 1.06 | 1.11 | 1.14 | 1.11 | 0.93  | 0.94  | 1.00 | 0.88 | 0.95 | 0.94 | 0.93 | 0.88 | 48.30  | 9.11 |
| P46471   | 26S protease regulatory subunit 7 OS=Mus musculus GN=Psmc2 PE=1 SV=5 - [PRS7_MOUSE]                                  | 50.12 | 2 | 17 | 17 | 62  | 0.95 | 1.13 | 1.20 | 1.03 | 1.13 | 0.98  | 1.05  | 1.00 | 1.04 | 1.07 | 1.16 | 1.02 | 1.10 | 48.62  | 5.95 |
| Q9D8U8   | Sorting nexin-5 OS=Mus musculus GN=Snx5 PE=1 SV=1 - [SNX5_MOUSE]                                                     | 22.77 | 1 | 7  | 7  | 18  | 0.98 | 0.84 | 0.92 | 0.95 | 1.03 | 0.89  | 0.98  | 1.00 | 1.02 | 0.98 | 0.97 | 0.97 | 1.01 | 46.77  | 6.62 |
| Q5SSM3-  | Isoform 2 of Rho GTPase-activating protein 44 OS=Mus musculus GN=Arhgap44 - [RHG44_MOUSE]                            | 15.31 | 5 | 8  | 8  | 15  | 0.94 | 0.94 | 0.98 | 1.06 | 1.15 | 0.96  | 1.04  | 1.00 | 1.05 | 0.98 | 1.08 | 0.99 | 1.02 | 83.22  | 6.73 |
| D3YZU5   | SH3 and multiple ankyrin repeat domains protein 1 OS=Mus musculus GN=Shank1 PE=2 SV=1 - [D3YZU5_MOUSE]               | 18.07 | 3 | 27 | 27 | 84  | 0.92 | 1.03 | 1.09 | 1.07 | 1.11 | 0.94  | 1.05  | 1.00 | 1.07 | 0.92 | 0.96 | 0.92 | 1.00 | 225.32 | 8.47 |
| F7BUB1   | NF-kappa-B inhibitor-interacting Ras-like protein 1 (Fragment) OS=Mus musculus GN=Nkiras1 PE=2 SV=1 - [F7BUB1_MOUSE] | 10.17 | 2 | 1  | 1  | 1   | 0.96 | 1.06 | 1.10 | 1.05 | 1.09 | 1.01  | 1.05  | 1.00 | 1.04 | 0.95 | 0.99 | 1.00 | 1.05 | 13.61  | 4.96 |
| P35951   | Low-density lipoprotein receptor OS=Mus musculus GN=Ldlr PE=1 SV=2 - [LDLR_MOUSE]                                    | 1.51  | 1 | 1  | 1  | 2   | 1.05 | 1.14 | 1.07 | 0.91 | 0.86 | 0.95  | 0.90  | 1.00 | 0.94 | 1.10 | 1.04 | 0.98 | 0.93 | 94.89  | 5.02 |

|          |                                                                                                                 |       |   |   |    |     |      |      |      |      |      |      |      |      |      |      |      |      |      |        |      |
|----------|-----------------------------------------------------------------------------------------------------------------|-------|---|---|----|-----|------|------|------|------|------|------|------|------|------|------|------|------|------|--------|------|
| E9Q0P6   | Lys-63-specific deubiquitinase BRCC36 (Fragment) OS=Mus musculus GN=Brcc3 PE=2 SV=1 - [E9Q0P6_MOUSE]            | 38.00 | 4 | 1 | 1  | 2   | 1.09 | 1.44 | 1.31 | 1.02 | 0.93 | 1.06 | 0.97 | 1.00 | 0.91 | 1.08 | 0.98 | 1.04 | 0.95 | 5.81   | 9.69 |
| Q8C3X4   | Isoform 2 of Translation factor Guf1, mitochondrial OS=Mus musculus GN=Guf1 - [GUF1_MOUSE]                      | 1.60  | 3 | 1 | 1  | 1   | 0.94 | 1.30 | 1.38 | 0.99 | 1.05 | 0.88 | 0.93 | 1.00 | 1.06 | 0.98 | 1.04 | 1.10 | 1.17 | 62.89  | 8.94 |
| O08530   | Sphingosine 1-phosphate receptor 1 OS=Mus musculus GN=S1pr1 PE=2 SV=3 - [S1PR1_MOUSE]                           | 13.35 | 1 | 4 | 4  | 10  | 1.06 | 1.20 | 1.41 | 1.15 | 1.08 | 1.07 | 0.97 | 1.00 | 1.00 | 1.02 | 0.99 | 1.04 | 1.00 | 42.61  | 9.42 |
| F6QA74   | DNA-(apurinic or apyrimidinic site) lyase (Fragment) OS=Mus musculus GN=Apex1 PE=2 SV=1 - [F6QA74_MOUSE]        | 29.76 | 3 | 6 | 6  | 14  | 0.96 | 1.30 | 1.11 | 1.12 | 1.20 | 0.99 | 0.95 | 1.00 | 1.02 | 0.98 | 1.03 | 1.15 | 1.24 | 32.30  | 8.57 |
| Q9CQ88   | Tetraspanin-31 OS=Mus musculus GN=Tspan31 PE=1 SV=1 - [TSN31_MOUSE]                                             | 5.71  | 1 | 1 | 1  | 1   | 1.14 | 0.86 | 0.75 | 0.93 | 0.81 | 0.99 | 0.86 | 1.00 | 0.87 | 0.93 | 0.81 | 1.17 | 1.02 | 22.68  | 8.44 |
| P62746   | Rho-related GTP-binding protein RhoB OS=Mus musculus GN=Rhob PE=1 SV=1 - [RHOB_MOUSE]                           | 66.84 | 1 | 6 | 9  | 106 | 1.00 | 0.93 | 0.93 | 0.92 | 0.97 | 0.99 | 1.00 | 1.00 | 1.00 | 0.99 | 0.99 | 0.94 | 0.95 | 22.11  | 5.24 |
| A2A432-2 | Isoform 2 of Cullin-4B OS=Mus musculus GN=Cul4b - [CUL4B_MOUSE]                                                 | 12.43 | 4 | 7 | 11 | 23  | 1.16 | 1.12 | 1.11 | 1.10 | 1.01 | 0.98 | 0.91 | 1.00 | 0.91 | 1.06 | 0.95 | 1.12 | 1.06 | 107.32 | 8.48 |
| H3BJE9   | RING finger protein 141 (Fragment) OS=Mus musculus GN=Rnf141 PE=2 SV=1 - [H3BJE9_MOUSE]                         | 17.11 | 3 | 1 | 1  | 4   | 0.87 | 1.18 | 1.35 | 0.95 | 1.10 | 0.91 | 1.05 | 1.00 | 1.15 | 0.82 | 0.95 | 0.84 | 0.97 | 8.39   | 5.83 |
| Q8BMJ3   | Eukaryotic translation initiation factor 1A, X-chromosomal OS=Mus musculus GN=Eif1ax PE=2 SV=3 - [EIF1AX_MOUSE] | 14.58 | 1 | 1 | 2  | 3   | 0.58 | 0.91 | 1.56 | 0.66 | 1.14 | 0.91 | 1.56 | 1.00 | 1.71 | 0.75 | 1.30 | 0.96 | 1.66 | 16.45  | 5.24 |
| Q8BZ47   | Zinc finger protein 609 OS=Mus musculus GN=Znf609 PE=1 SV=2 - [ZN609_MOUSE]                                     | 1.49  | 1 | 1 | 1  | 2   | 1.03 | 0.52 | 0.50 | 1.02 | 0.99 | 1.33 | 1.28 | 1.00 | 0.97 | 1.16 | 1.12 | 0.90 | 0.88 | 151.02 | 8.00 |
| Q68EF0   | Rab-3A-interacting protein OS=Mus musculus GN=Rab3ip PE=1 SV=1 - [RAB3I_MOUSE]                                  | 7.94  | 1 | 2 | 2  | 5   | 1.02 | 0.87 | 1.00 | 1.06 | 1.07 | 1.00 | 1.05 | 1.00 | 1.12 | 1.01 | 1.12 | 1.11 | 1.13 | 47.10  | 6.71 |

|          |                                                                                                                |       |   |    |    |     |      |      |      |      |      |       |       |      |      |      |      |      |      |        |       |
|----------|----------------------------------------------------------------------------------------------------------------|-------|---|----|----|-----|------|------|------|------|------|-------|-------|------|------|------|------|------|------|--------|-------|
| B1ATZ0   | Hepatocyte growth factor-regulated tyrosine kinase substrate OS=Mus musculus GN=Hgs PE=2 SV=1 - [B1ATZ0_MOUSE] | 27.55 | 6 | 20 | 20 | 73  | 0.94 | 0.94 | 1.03 | 0.93 | 1.00 | 0.96  | 1.02  | 1.00 | 1.06 | 0.92 | 0.97 | 0.94 | 1.00 | 85.72  | 7.47  |
| Q9WU7    | Cathepsin Z OS=Mus musculus GN=Csz PE=2 SV=1 - [CATZ_MOUSE]                                                    | 11.76 | 1 | 3  | 3  | 6   | 0.88 | 0.93 | 1.12 | 0.89 | 0.99 | 0.95  | 1.14  | 1.00 | 1.20 | 0.95 | 1.12 | 0.93 | 1.05 | 33.97  | 6.60  |
| Q62470-3 | Isoform 3 of Integrin alpha-3 OS=Mus musculus GN=Itga3 - [ITA3_MOUSE]                                          | 1.66  | 4 | 2  | 2  | 3   | 1.11 | 1.06 | 0.95 | 0.91 | 0.82 | 0.98  | 0.87  | 1.00 | 0.90 | 1.02 | 0.91 | 0.96 | 0.87 | 113.36 | 6.14  |
| P84075   | Neuron-specific calcium-binding protein hippocalin OS=Mus musculus GN=Hpcal PE=1 SV=2 - [HPCA_MOUSE]           | 79.27 | 4 | 6  | 19 | 286 | 0.96 | 0.88 | 0.93 | 0.91 | 0.97 | 1.00  | 1.02  | 1.00 | 1.06 | 0.85 | 0.85 | 1.00 | 1.03 | 22.41  | 4.97  |
| P68037   | Ubiquitin-conjugating enzyme E2 L3 OS=Mus musculus GN=Ube2l3 PE=2 SV=1 - [UB2L3_MOUSE]                         | 63.64 | 2 | 6  | 6  | 43  | 1.02 | 0.76 | 0.80 | 0.89 | 0.90 | 0.99  | 1.01  | 1.00 | 1.02 | 0.93 | 0.93 | 0.88 | 0.91 | 17.85  | 8.51  |
| Q8VE70   | Programmed cell death protein 10 OS=Mus musculus GN=Pdc10 PE=1 SV=1 - [PDC10_MOUSE]                            | 17.92 | 3 | 4  | 4  | 10  | 1.01 | 1.13 | 1.12 | 1.07 | 1.03 | 0.96  | 0.92  | 1.00 | 0.95 | 0.93 | 0.90 | 0.92 | 0.89 | 24.70  | 8.19  |
| Q6VVW5   | Isoform 3 of Atrial natriuretic peptide receptor 2 OS=Mus musculus GN=Npr2 - [ANPRB_MOUSE]                     | 3.11  | 4 | 1  | 1  | 2   | 1.02 | 2.05 | 2.00 | 1.08 | 1.05 | 0.95  | 0.92  | 1.00 | 0.97 | 1.04 | 1.02 | 1.02 | 1.00 | 46.41  | 6.07  |
| Q8VBV7   | COP9 signalosome complex subunit 8 OS=Mus musculus GN=Cops8 PE=1 SV=1 - [CSN8_MOUSE]                           | 42.58 | 1 | 5  | 5  | 26  | 1.03 | 1.20 | 1.18 | 1.03 | 1.02 | 1.07  | 1.03  | 1.00 | 1.01 | 1.12 | 1.09 | 0.96 | 1.01 | 23.24  | 5.20  |
| Q5SX40   | Myosin-1 OS=Mus musculus GN=Myh1 PE=1 SV=1 - [MYH1_MOUSE]                                                      | 40.01 | 5 | 10 | 68 | 228 | 0.95 | 1.14 | 1.24 | 0.83 | 0.80 | 10.19 | 10.51 | 1.00 | 0.86 | 1.06 | 0.88 | 1.03 | 1.05 | 223.20 | 5.76  |
| Q9D115   | Zinc finger protein 706 OS=Mus musculus GN=Znf706 PE=2 SV=1 - [ZN706_MOUSE]                                    | 14.47 | 1 | 1  | 1  | 2   | 0.88 | 0.84 | 0.95 | 0.77 | 0.87 | 1.05  | 1.19  | 1.00 | 1.13 | 0.94 | 1.06 | 0.86 | 0.97 | 8.49   | 10.01 |
| P62307   | Small nuclear ribonucleoprotein F OS=Mus musculus GN=Snrpf PE=2 SV=1 - [RUXF_MOUSE]                            | 6.98  | 1 | 1  | 1  | 1   | 1.14 | 1.16 | 1.02 | 1.34 | 1.17 | 1.15  | 1.00  | 1.00 | 0.88 | 1.23 | 1.08 | 1.11 | 0.98 | 9.72   | 4.67  |
| Q8BML1   | Protein-methionine sulfoxide oxidase MICAL2 OS=Mus musculus GN=Mical2 PE=1 SV=1 - [MICA2_MOUSE]                | 3.33  | 4 | 1  | 3  | 7   | 0.87 | 1.12 | 1.28 | 0.75 | 0.86 | 1.15  | 1.31  | 1.00 | 1.15 | 0.96 | 1.11 | 0.89 | 1.03 | 110.00 | 8.10  |

|          |                                                                                                            |       |   |    |    |    |      |      |      |      |      |      |      |      |      |      |      |      |      |        |       |
|----------|------------------------------------------------------------------------------------------------------------|-------|---|----|----|----|------|------|------|------|------|------|------|------|------|------|------|------|------|--------|-------|
| E9QP15   | Sister chromatid cohesion protein PDS5 homolog A OS=Mus musculus GN=Pds5a PE=4 SV=1 - [E9QP15_MOUSE]       | 1.50  | 2 | 1  | 1  | 4  | 0.81 | 0.98 | 1.21 | 1.19 | 1.47 | 0.94 | 1.15 | 1.00 | 1.24 | 1.23 | 1.53 | 1.08 | 1.33 | 150.13 | 7.85  |
| Q80TR1   | Latrophilin-1 OS=Mus musculus GN=Lphn1 PE=1 SV=2 - [LPHN1_MOUSE]                                           | 24.08 | 7 | 24 | 24 | 67 | 1.05 | 1.13 | 1.07 | 1.06 | 1.03 | 0.99 | 0.94 | 1.00 | 0.96 | 1.04 | 1.01 | 1.01 | 0.97 | 161.58 | 6.48  |
| Q3TPE9-2 | Isoform 2 of Ankyrin repeat and MYND domain-containing protein 2 OS=Mus musculus GN=Ankmy2 - [ANKY2_MOUSE] | 10.00 | 2 | 3  | 3  | 6  | 0.97 | 0.87 | 0.95 | 1.03 | 0.94 | 0.95 | 0.97 | 1.00 | 1.07 | 1.01 | 1.03 | 1.00 | 1.08 | 33.60  | 8.12  |
| P35980   | 60S ribosomal protein L18 OS=Mus musculus GN=Rpl18 PE=2 SV=3 - [RL18_MOUSE]                                | 29.79 | 5 | 5  | 5  | 10 | 1.07 | 0.93 | 0.90 | 1.07 | 0.98 | 1.04 | 1.06 | 1.00 | 0.94 | 1.01 | 0.95 | 0.99 | 1.01 | 21.63  | 11.78 |
| Q9D020-1 | Isoform 1 of Cytosolic 5'-nucleotidase 3A OS=Mus musculus GN=Ni5c3a - [SNT3A_MOUSE]                        | 13.13 | 2 | 3  | 3  | 6  | 0.98 | 0.96 | 0.98 | 1.08 | 1.11 | 1.03 | 1.05 | 1.00 | 1.18 | 0.96 | 0.99 | 1.10 | 1.13 | 33.77  | 5.69  |
| Q9QZB9   | Dynactin subunit 5 OS=Mus musculus GN=Dctn5 PE=1 SV=1 - [DCTN5_MOUSE]                                      | 6.04  | 1 | 1  | 1  | 1  | 1.14 | 1.08 | 0.95 | 0.97 | 0.85 | 0.92 | 0.80 | 1.00 | 0.88 | 0.94 | 0.83 | 0.93 | 0.82 | 20.13  | 8.02  |
| Q8BVI4   | Dihydropteridine reductase OS=Mus musculus GN=Qdpr PE=1 SV=2 - [DHPR_MOUSE]                                | 50.62 | 4 | 8  | 8  | 36 | 0.99 | 0.93 | 1.01 | 1.02 | 1.04 | 1.07 | 1.07 | 1.00 | 1.03 | 1.10 | 1.07 | 1.07 | 1.15 | 25.55  | 7.81  |
| F8VQK3   | Protein Gucy1a2 OS=Mus musculus GN=Gucy1a2 PE=2 SV=1 - [F8VQK3_MOUSE]                                      | 11.10 | 1 | 7  | 7  | 11 | 0.94 | 1.21 | 1.13 | 1.19 | 1.32 | 0.89 | 0.92 | 1.00 | 1.10 | 1.03 | 1.05 | 1.11 | 1.10 | 81.78  | 6.87  |
| Q8VD79   | 39S ribosomal protein L50, mitochondrial OS=Mus musculus GN=Mrlp50 PE=2 SV=2 - [RMS50_MOUSE]               | 37.74 | 1 | 4  | 4  | 15 | 1.06 | 0.86 | 0.78 | 0.97 | 0.90 | 0.99 | 0.96 | 1.00 | 0.98 | 0.98 | 0.83 | 0.92 | 1.02 | 18.20  | 9.33  |
| O88520   | Leucine-rich repeat protein SHOC-2 OS=Mus musculus GN=Shoc2 PE=2 SV=2 - [SHOC2_MOUSE]                      | 3.61  | 1 | 2  | 2  | 4  | 1.09 | 1.40 | 1.29 | 1.13 | 1.04 | 1.04 | 0.95 | 1.00 | 0.92 | 1.14 | 1.05 | 1.28 | 1.18 | 64.85  | 8.46  |
| Q6PIN8   | DALR anticodon-binding domain-containing protein 3 OS=Mus musculus GN=Dalrd3 PE=2 SV=1 - [DALD3_MOUSE]     | 2.79  | 1 | 1  | 1  | 2  | 0.85 | 0.89 | 1.05 | 1.06 | 1.25 | 1.03 | 1.20 | 1.00 | 1.17 | 1.03 | 1.21 | 1.18 | 1.39 | 58.70  | 8.15  |
| Q91VI7   | Ribonuclease inhibitor OS=Mus musculus GN=Rnh1 PE=1 SV=1 - [RINI_MOUSE]                                    | 33.99 | 1 | 11 | 11 | 20 | 0.97 | 1.03 | 1.08 | 1.04 | 1.07 | 0.98 | 1.03 | 1.00 | 0.99 | 1.06 | 1.07 | 1.18 | 1.16 | 49.78  | 4.78  |



|          |                                                                                                          |       |    |    |    |     |      |      |      |      |      |      |      |      |      |      |      |      |      |        |      |
|----------|----------------------------------------------------------------------------------------------------------|-------|----|----|----|-----|------|------|------|------|------|------|------|------|------|------|------|------|------|--------|------|
| Q99M11-2 | Isoform 2 of ELKS/Rab6-interacting/CAST family member 1 OS=Mus musculus GN=Erc1 [RB6I2_MOUSE]            | 43.75 | 2  | 2  | 44 | 164 | 0.93 | 1.06 | 1.03 | 0.84 | 0.83 | 1.33 | 1.12 | 1.00 | 0.99 | 0.98 | 0.90 | 0.95 | 0.93 | 111.86 | 6.49 |
| A2A9I0   | Golgi SNAP receptor complex member 2 OS=Mus musculus GN=Gosr2 PE=4 SV=1 [A2A9I0_MOUSE]                   | 16.36 | 2  | 2  | 2  | 3   | 0.86 | 1.01 | 1.17 | 0.98 | 1.15 | 1.00 | 1.16 | 1.00 | 1.17 | 0.97 | 1.13 | 1.00 | 1.16 | 19.56  | 9.50 |
| Q6VN19   | Ran-binding protein 10 OS=Mus musculus GN=Ranbp10 PE=1 SV=2 [RBP10_MOUSE]                                | 4.35  | 1  | 2  | 2  | 3   | 0.84 | 1.42 | 1.69 | 0.92 | 1.10 | 1.21 | 1.43 | 1.00 | 1.19 | 0.79 | 0.94 | 0.99 | 1.18 | 67.15  | 6.58 |
| Q3UF75   | Alpha-parvin OS=Mus musculus GN=Parva PE=2 SV=1 [Q3UF75_MOUSE]                                           | 10.71 | 5  | 2  | 3  | 5   | 0.96 | 0.92 | 0.96 | 1.06 | 1.10 | 1.00 | 1.04 | 1.00 | 1.04 | 1.02 | 1.06 | 0.92 | 0.97 | 38.34  | 5.12 |
| Q9R0K7   | Plasma membrane calcium-transporting ATPase 2 OS=Mus musculus GN=Atp2b2 PE=1 SV=2 [AT2B2_MOUSE]          | 44.32 | 2  | 33 | 48 | 353 | 0.92 | 1.02 | 1.11 | 1.09 | 1.17 | 0.96 | 1.03 | 1.00 | 1.05 | 0.92 | 1.03 | 0.85 | 0.96 | 132.50 | 5.96 |
| Q9EP89   | Serine beta-lactamase-like protein LACTB, mitochondrial OS=Mus musculus GN=Lactb PE=1 SV=1 [LACTB_MOUSE] | 21.23 | 1  | 8  | 8  | 13  | 0.95 | 0.98 | 1.04 | 1.01 | 1.10 | 0.91 | 1.13 | 1.00 | 1.02 | 1.06 | 1.13 | 1.00 | 1.09 | 60.67  | 8.90 |
| D3Z7Q2   | Uncharacterized protein OS=Mus musculus GN=Smim20 PE=2 SV=1 [D3Z7Q2_MOUSE]                               | 20.29 | 1  | 1  | 1  | 2   | 0.92 | 1.04 | 1.13 | 1.04 | 1.12 | 1.05 | 1.14 | 1.00 | 1.08 | 0.96 | 1.05 | 1.02 | 1.11 | 7.81   | 9.70 |
| Q08642   | Protein-arginine deiminase type-2 OS=Mus musculus GN=Padl2 PE=1 SV=2 [PADL2_MOUSE]                       | 12.63 | 1  | 7  | 7  | 15  | 1.07 | 1.37 | 1.17 | 1.25 | 1.13 | 0.99 | 1.07 | 1.00 | 0.97 | 1.08 | 0.94 | 1.13 | 1.14 | 76.20  | 5.53 |
| E9Q9N6   | Serine/threonine-protein kinase MARK2 OS=Mus musculus GN=Mark2 PE=2 SV=1 [E9Q9N6_MOUSE]                  | 21.50 | 18 | 7  | 12 | 24  | 0.98 | 0.89 | 0.99 | 1.06 | 1.06 | 1.00 | 1.01 | 1.00 | 1.04 | 1.01 | 1.02 | 0.96 | 0.99 | 79.04  | 9.64 |
| Q8C0K8   | Protein Uvrag OS=Mus musculus GN=Uvrag PE=2 SV=1 [Q8C0K8_MOUSE]                                          | 3.01  | 1  | 1  | 1  | 2   | 0.82 | 1.80 | 2.19 | 1.20 | 1.46 | 1.07 | 1.30 | 1.00 | 1.22 | 0.96 | 1.17 | 0.99 | 1.21 | 77.48  | 7.97 |
| O88587-2 | Isoform Soluble of Catechol O-methyltransferase OS=Mus musculus GN=Comt [COMT_MOUSE]                     | 13.96 | 2  | 3  | 3  | 5   | 1.14 | 1.01 | 0.82 | 1.24 | 1.01 | 0.94 | 1.02 | 1.00 | 0.81 | 0.94 | 0.77 | 0.98 | 0.80 | 24.69  | 5.47 |

|          |                                                                                                                    |       |   |    |    |     |      |      |      |      |      |      |      |      |      |      |      |      |      |        |       |
|----------|--------------------------------------------------------------------------------------------------------------------|-------|---|----|----|-----|------|------|------|------|------|------|------|------|------|------|------|------|------|--------|-------|
| Q8BHS6   | Armadillo repeat-containing X-linked protein 3 OS=Mus musculus GN=Armxc3 PE=1 SV=1 - [ARMX3_MOUSE]                 | 5.01  | 1 | 1  | 1  | 2   | 0.98 | 1.14 | 1.16 | 1.11 | 1.12 | 1.21 | 1.22 | 1.00 | 1.02 | 1.26 | 1.28 | 1.36 | 1.38 | 42.59  | 8.68  |
| Q8R1G1   | Isoform 2 of Threonine aspartase 1 OS=Mus musculus GN=Tasp1 - [TASP1_MOUSE]                                        | 7.91  | 3 | 2  | 2  | 3   | 0.97 | 0.89 | 0.92 | 0.95 | 0.97 | 0.98 | 1.00 | 1.00 | 1.03 | 0.87 | 0.90 | 0.81 | 0.83 | 27.53  | 9.00  |
| Q3TJD7   | PDZ and LIM domain protein 7 OS=Mus musculus GN=Pdlim7 PE=2 SV=1 - [PDL17_MOUSE]                                   | 10.07 | 7 | 4  | 4  | 5   | 1.02 | 0.92 | 0.94 | 0.97 | 0.96 | 0.71 | 0.78 | 1.00 | 0.96 | 1.08 | 1.07 | 0.79 | 0.84 | 50.09  | 8.47  |
| F8WGE3   | ATP-binding cassette sub-family A member 8-A OS=Mus musculus GN=Abca8a PE=2 SV=1 - [F8WGE3_MOUSE]                  | 0.86  | 3 | 1  | 1  | 2   | 1.04 | 1.57 | 1.50 | 1.01 | 0.97 | 0.90 | 0.86 | 1.00 | 0.96 | 0.86 | 0.82 | 0.88 | 0.84 | 183.71 | 7.36  |
| Q4KMS1   | Tripartite motif-containing 44 OS=Mus musculus GN=Trim44 PE=2 SV=1 - [Q4KMS1_MOUSE]                                | 19.13 | 4 | 4  | 4  | 9   | 0.83 | 0.81 | 0.97 | 0.75 | 0.96 | 1.08 | 1.30 | 1.00 | 1.25 | 1.01 | 1.28 | 0.89 | 1.12 | 38.11  | 4.18  |
| Q9QXY6   | EH domain-containing protein 3 OS=Mus musculus GN=Ehd3 PE=1 SV=2 - [EHD3_MOUSE]                                    | 61.12 | 1 | 15 | 25 | 91  | 0.92 | 0.96 | 1.04 | 1.03 | 1.08 | 0.98 | 1.04 | 1.00 | 1.05 | 0.99 | 1.07 | 0.99 | 1.06 | 60.78  | 6.46  |
| Q9D819   | Inorganic pyrophosphatase OS=Mus musculus GN=Ppa1 PE=1 SV=1 - [IPYR_MOUSE]                                         | 78.20 | 1 | 20 | 20 | 68  | 0.87 | 0.71 | 0.82 | 0.82 | 0.96 | 0.88 | 1.04 | 1.00 | 1.17 | 0.86 | 0.98 | 0.83 | 0.98 | 32.65  | 5.60  |
| Q9ERS2   | NADH dehydrogenase [ubiquinone] 1 alpha subcomplex subunit 13 OS=Mus musculus GN=Ndufa13 PE=1 SV=3 - [NDUAD_MOUSE] | 53.47 | 1 | 7  | 7  | 31  | 1.04 | 1.04 | 1.01 | 1.14 | 1.12 | 1.07 | 1.05 | 1.00 | 1.06 | 1.15 | 1.12 | 1.04 | 1.08 | 16.85  | 9.48  |
| G5E8K5-2 | Isoform 2 of Ankyrin-3 OS=Mus musculus GN=Ank3 - [ANK3_MOUSE]                                                      | 34.01 | 9 | 31 | 38 | 112 | 0.97 | 1.09 | 1.07 | 1.04 | 1.07 | 0.96 | 1.00 | 1.00 | 1.05 | 0.95 | 0.97 | 0.96 | 0.98 | 188.14 | 7.75  |
| Q9QY14   | DnaJ homolog subfamily B member 12 OS=Mus musculus GN=Dnajb12 PE=2 SV=2 - [DJB12_MOUSE]                            | 8.24  | 2 | 3  | 3  | 6   | 0.98 | 1.41 | 1.44 | 1.11 | 1.13 | 1.04 | 1.07 | 1.00 | 1.07 | 1.08 | 1.12 | 1.07 | 1.10 | 41.96  | 8.51  |
| Q9Z127   | Large neutral amino acids transporter small subunit 1 OS=Mus musculus GN=Slc7a5 PE=1 SV=2 - [LAT1_MOUSE]           | 11.52 | 1 | 4  | 4  | 11  | 0.97 | 1.20 | 1.23 | 1.02 | 1.07 | 0.87 | 0.97 | 1.00 | 0.99 | 0.94 | 0.97 | 0.89 | 0.90 | 55.84  | 7.90  |
| P62911   | 60S ribosomal protein L32 OS=Mus musculus GN=Rpl32 PE=2 SV=2 - [RL32_MOUSE]                                        | 17.78 | 3 | 2  | 2  | 5   | 1.19 | 0.89 | 1.52 | 1.76 | 1.48 | 1.19 | 1.00 | 1.00 | 0.84 | 1.40 | 1.18 | 1.64 | 1.38 | 15.85  | 11.33 |

|          |                                                                                                                                 |       |   |   |    |    |      |      |      |      |      |      |      |      |      |      |      |      |      |        |       |
|----------|---------------------------------------------------------------------------------------------------------------------------------|-------|---|---|----|----|------|------|------|------|------|------|------|------|------|------|------|------|------|--------|-------|
| G3UXZ5   | Proteasome activator complex subunit 1 (Fragment) OS=Mus musculus GN=Psmel PE=2 SV=1 - [G3UXZ5_MOUSE]                           | 36.55 | 5 | 9 | 9  | 36 | 1.04 | 0.84 | 0.77 | 0.85 | 0.82 | 1.07 | 1.00 | 1.00 | 0.96 | 0.99 | 0.96 | 1.07 | 1.00 | 27.39  | 5.60  |
| O35926   | Cyclin-dependent kinase 5 activator 2 OS=Mus musculus GN=Cdk5r2 PE=3 SV=2 - [CD5R2_MOUSE]                                       | 9.76  | 1 | 2 | 2  | 3  | 0.89 | 0.90 | 1.08 | 0.95 | 1.07 | 1.06 | 1.22 | 1.00 | 1.22 | 1.03 | 1.16 | 0.84 | 0.96 | 38.90  | 9.72  |
| P34928   | Apolipoprotein C-I OS=Mus musculus GN=Apoc1 PE=2 SV=1 - [APOC1_MOUSE]                                                           | 10.23 | 1 | 1 | 1  | 2  | 0.67 | 0.95 | 1.42 | 0.54 | 0.80 | 0.73 | 1.09 | 1.00 | 1.50 | 1.81 | 2.72 | 1.10 | 1.65 | 9.69   | 9.09  |
| Q8CAL5   | Glypican-5 OS=Mus musculus GN=Gpc5 PE=2 SV=1 - [GPC5_MOUSE]                                                                     | 10.31 | 3 | 5 | 5  | 8  | 0.99 | 0.94 | 1.09 | 1.03 | 1.06 | 1.02 | 0.97 | 1.00 | 0.98 | 1.07 | 1.13 | 1.08 | 1.09 | 63.75  | 7.30  |
| O70325-2 | Isoform Cytoplasmic of Phospholipid hydroperoxide glutathione peroxidase, mitochondrial OS=Mus musculus GN=Gpx4 - [GPX41_MOUSE] | 34.71 | 4 | 5 | 5  | 15 | 0.99 | 0.95 | 0.95 | 1.01 | 1.04 | 0.85 | 0.88 | 1.00 | 0.92 | 0.95 | 0.84 | 0.90 | 0.91 | 19.51  | 8.05  |
| E9Q5Y2   | Splicing factor U2AF 26 kDa subunit OS=Mus musculus GN=U2af14 PE=2 SV=1 - [E9Q5Y2_MOUSE]                                        | 14.92 | 7 | 1 | 2  | 5  | 1.00 | 0.97 | 0.97 | 0.77 | 0.77 | 0.78 | 0.78 | 1.00 | 1.00 | 1.01 | 1.02 | 1.03 | 1.03 | 21.33  | 8.98  |
| Q9CPS6   | Histidine triad nucleotide-binding protein 3 OS=Mus musculus GN=Hint3 PE=2 SV=1 - [HINT3_MOUSE]                                 | 23.64 | 3 | 3 | 3  | 8  | 0.90 | 0.84 | 0.97 | 1.03 | 1.15 | 0.93 | 1.02 | 1.00 | 1.11 | 1.02 | 1.03 | 1.01 | 1.14 | 18.78  | 6.33  |
| F6XIS3   | Mid1-interacting protein 1 (Fragment) OS=Mus musculus GN=Mid1ip1 PE=2 SV=1 - [F6XIS3_MOUSE]                                     | 17.65 | 2 | 1 | 1  | 2  | 0.93 | 1.12 | 1.20 | 0.94 | 1.01 | 1.11 | 1.19 | 1.00 | 1.08 | 1.22 | 1.31 | 1.06 | 1.14 | 5.85   | 4.55  |
| E9Q8P5   | PDZ and LIM domain protein 5 OS=Mus musculus GN=Pdlim5 PE=2 SV=2 - [E9Q8P5_MOUSE]                                               | 38.08 | 4 | 2 | 6  | 20 | 1.03 | 0.67 | 0.65 | 1.00 | 0.97 | 1.10 | 1.06 | 1.00 | 0.98 | 0.99 | 0.97 | 0.96 | 0.93 | 26.34  | 9.67  |
| Q99KY4-  | Isoform 2 of Cyclin-G-associated kinase OS=Mus musculus GN=Gak - [GAK_MOUSE]                                                    | 10.19 | 4 | 9 | 11 | 34 | 1.01 | 1.09 | 0.92 | 1.05 | 0.96 | 1.08 | 0.95 | 1.00 | 1.01 | 1.00 | 0.91 | 1.00 | 0.95 | 138.26 | 5.96  |
| Q6PAN7-  | Isoform 2 of Proline-rich protein 18 OS=Mus musculus GN=Prr18 - [PRR18_MOUSE]                                                   | 15.64 | 2 | 2 | 2  | 3  | 1.09 | 0.90 | 0.82 | 0.94 | 0.86 | 1.03 | 0.95 | 1.00 | 0.92 | 0.83 | 0.77 | 1.15 | 1.06 | 25.56  | 10.35 |
| Q99JG2   | Endothelin B receptor-like protein 2 OS=Mus musculus GN=Gpr3711 PE=1 SV=2 - [ETBR2_MOUSE]                                       | 9.77  | 1 | 3 | 3  | 9  | 1.14 | 0.87 | 0.91 | 1.11 | 0.95 | 0.96 | 0.76 | 1.00 | 0.84 | 0.97 | 0.85 | 1.00 | 0.92 | 52.69  | 7.36  |

|          |                                                                                                                       |       |   |    |    |    |      |      |      |      |      |      |      |      |      |      |      |      |      |        |      |
|----------|-----------------------------------------------------------------------------------------------------------------------|-------|---|----|----|----|------|------|------|------|------|------|------|------|------|------|------|------|------|--------|------|
| Q50H33-2 | Isoform 2 of BTB/POZ domain-containing protein KCTD8 OS=Mus musculus GN=Kctd8 - [KCTD8_MOUSE]                         | 9.83  | 3 | 1  | 3  | 9  | 0.93 | 1.05 | 1.09 | 0.99 | 0.98 | 0.86 | 0.94 | 1.00 | 1.10 | 0.93 | 1.04 | 0.85 | 0.82 | 37.96  | 8.22 |
| Q9DCL8   | Protein phosphatase inhibitor 2 OS=Mus musculus GN=Ppp1r2 PE=1 SV=3 - [IPP2_MOUSE]                                    | 69.42 | 6 | 10 | 10 | 80 | 1.06 | 0.72 | 0.66 | 0.92 | 0.86 | 1.09 | 1.03 | 1.00 | 0.99 | 1.04 | 0.97 | 0.99 | 0.97 | 23.11  | 4.83 |
| Q9CXT8   | Mitochondrial-processing peptidase subunit beta OS=Mus musculus GN=Pmpcb PE=2 SV=1 - [MPPB_MOUSE]                     | 10.43 | 1 | 4  | 4  | 7  | 0.93 | 1.12 | 1.18 | 1.05 | 1.13 | 0.96 | 1.02 | 1.00 | 1.07 | 1.05 | 1.11 | 1.11 | 1.17 | 54.58  | 6.99 |
| Q6NVF0-  | Isoform 2 of Inositol polyphosphate 5-phosphate OCRL-1 OS=Mus musculus GN=Ocr1 - [OCRL_MOUSE]                         | 13.20 | 2 | 7  | 7  | 12 | 1.08 | 1.17 | 1.03 | 1.10 | 1.02 | 1.11 | 1.01 | 1.00 | 0.95 | 1.18 | 1.06 | 1.13 | 1.00 | 83.96  | 6.60 |
| Q9EQZ6-  | Isoform 3 of Rap guanine nucleotide exchange factor 4 OS=Mus musculus GN=Rapgef4 - [RPGF4_MOUSE]                      | 12.39 | 7 | 8  | 8  | 15 | 1.11 | 1.14 | 1.17 | 1.08 | 1.03 | 0.97 | 1.03 | 1.00 | 0.99 | 0.96 | 0.93 | 1.09 | 1.02 | 113.42 | 6.83 |
| Q9DBT3   | Coiled-coil domain-containing protein 97 OS=Mus musculus GN=Ccdc97 PE=1 SV=1 - [CCD97_MOUSE]                          | 17.65 | 1 | 3  | 3  | 6  | 0.81 | 1.05 | 1.29 | 0.66 | 0.81 | 0.94 | 1.39 | 1.00 | 1.30 | 1.06 | 1.31 | 0.92 | 1.13 | 38.70  | 4.60 |
| O55286   | Putative pre-mRNA-splicing factor ATP-dependent RNA helicase DHX15 OS=Mus musculus GN=Dhx15 PE=2 SV=2 - [DHX15_MOUSE] | 18.74 | 1 | 11 | 11 | 36 | 0.99 | 1.04 | 1.08 | 1.08 | 1.08 | 0.99 | 0.99 | 1.00 | 1.01 | 1.00 | 0.99 | 1.08 | 1.12 | 90.95  | 7.46 |
| Q6PE01   | U5 small nuclear ribonucleoprotein 40 kDa protein OS=Mus musculus GN=Smp40 PE=2 SV=1 - [SNR40_MOUSE]                  | 7.54  | 1 | 2  | 2  | 3  | 0.91 | 0.83 | 0.91 | 1.03 | 1.13 | 0.97 | 1.07 | 1.00 | 1.10 | 0.96 | 1.06 | 0.95 | 1.05 | 39.25  | 8.10 |
| Q60817   | Nascent polypeptide-associated complex subunit alpha OS=Mus musculus GN=Naca PE=1 SV=1 - [NACA_MOUSE]                 | 35.81 | 2 | 4  | 4  | 31 | 1.02 | 0.89 | 0.95 | 0.90 | 0.90 | 0.93 | 0.91 | 1.00 | 1.00 | 0.87 | 0.86 | 0.85 | 0.92 | 23.37  | 4.56 |
| E0CY60   | Rho guanine nucleotide exchange factor 4 (Fragment) OS=Mus musculus GN=Arhgef4 PE=2 SV=1 - [E0CY60_MOUSE]             | 7.37  | 5 | 1  | 1  | 4  | 1.22 | 1.10 | 0.90 | 0.94 | 0.77 | 1.19 | 0.97 | 1.00 | 0.82 | 0.96 | 0.79 | 1.68 | 1.38 | 22.11  | 4.89 |

|        |                                                                                                 |       |   |    |    |     |      |      |      |      |      |      |      |      |      |      |      |      |      |        |       |
|--------|-------------------------------------------------------------------------------------------------|-------|---|----|----|-----|------|------|------|------|------|------|------|------|------|------|------|------|------|--------|-------|
| O70310 | Glycylpeptide N-tetradecanoyltransferase 1 OS=Mus musculus GN=Nmt1 PE=1 SV=1 - [NMT1_MOUSE]     | 27.62 | 1 | 8  | 10 | 26  | 0.99 | 0.93 | 0.95 | 0.97 | 0.93 | 0.99 | 1.00 | 1.00 | 0.96 | 0.98 | 0.95 | 1.04 | 1.00 | 56.85  | 8.00  |
| Q76KJ5 | DNA-directed RNA polymerase I subunit RPA34 OS=Mus musculus GN=Cd3eap PE=1 SV=2 - [RPA34_MOUSE] | 5.26  | 1 | 1  | 1  | 1   | 1.02 | 0.98 | 0.95 | 1.12 | 1.09 | 1.04 | 1.02 | 1.00 | 0.98 | 1.14 | 1.11 | 1.03 | 1.00 | 43.06  | 9.61  |
| P42859 | Huntingtin OS=Mus musculus GN=Htt PE=1 SV=2 - [HD_MOUSE]                                        | 4.97  | 3 | 11 | 11 | 21  | 1.01 | 1.25 | 1.22 | 1.10 | 1.12 | 0.89 | 0.91 | 1.01 | 0.94 | 1.04 | 1.02 | 1.10 | 1.05 | 344.47 | 6.29  |
| Q9CQE3 | 28S ribosomal protein S17, mitochondrial OS=Mus musculus GN=Mrps17 PE=2 SV=1 - [RT17_MOUSE]     | 27.50 | 2 | 2  | 2  | 4   | 0.88 | 0.86 | 0.97 | 1.16 | 1.31 | 0.99 | 1.12 | 1.01 | 1.14 | 0.97 | 1.10 | 0.94 | 1.07 | 13.37  | 9.89  |
| Q9D7X8 | Gamma-glutamylcyclotransferase OS=Mus musculus GN=Ggct PE=2 SV=1 - [GGCT_MOUSE]                 | 10.11 | 1 | 2  | 2  | 3   | 1.00 | 0.85 | 0.86 | 1.07 | 1.02 | 0.97 | 0.98 | 1.01 | 1.02 | 1.00 | 1.02 | 0.96 | 0.98 | 21.15  | 5.67  |
| Q64332 | Synapsin-2 OS=Mus musculus GN=Syn2 PE=1 SV=2 - [SYN2_MOUSE]                                     | 58.36 | 1 | 3  | 25 | 466 | 1.04 | 0.87 | 0.87 | 1.02 | 0.94 | 1.07 | 0.98 | 1.01 | 1.00 | 1.04 | 1.03 | 1.20 | 1.09 | 63.33  | 8.43  |
| Q91YT7 | Protein Ythdf2 OS=Mus musculus GN=Ythdf2 PE=2 SV=1 - [Q91YT7_MOUSE]                             | 8.98  | 1 | 3  | 4  | 10  | 0.96 | 0.96 | 1.10 | 0.99 | 1.08 | 1.10 | 1.13 | 1.01 | 1.04 | 1.03 | 1.08 | 0.97 | 1.06 | 62.24  | 8.79  |
| Q56A07 | Sodium channel subunit beta-2 OS=Mus musculus GN=Scn2b PE=1 SV=1 - [SCN2B_MOUSE]                | 30.70 | 1 | 8  | 8  | 43  | 1.13 | 0.91 | 0.98 | 1.08 | 1.02 | 1.06 | 1.07 | 1.01 | 0.94 | 0.96 | 0.90 | 1.03 | 1.09 | 24.21  | 6.54  |
| Q00896 | Alpha-1-antitrypsin 1-3 OS=Mus musculus GN=Serpina1c PE=1 SV=2 - [A1AT3_MOUSE]                  | 21.36 | 3 | 3  | 8  | 19  | 0.95 | 1.22 | 1.28 | 0.72 | 0.83 | 1.05 | 1.16 | 1.01 | 1.24 | 1.21 | 1.33 | 0.73 | 0.83 | 45.79  | 5.44  |
| Q00560 | Interleukin-6 receptor subunit beta OS=Mus musculus GN=Il6st PE=1 SV=2 - [IL6RB_MOUSE]          | 9.16  | 1 | 4  | 4  | 8   | 1.02 | 1.13 | 1.13 | 0.91 | 0.90 | 1.02 | 1.01 | 1.01 | 1.02 | 1.10 | 1.08 | 1.10 | 1.05 | 102.39 | 5.52  |
| E9QIS0 | 28S ribosomal protein S10, mitochondrial OS=Mus musculus GN=Mrps10 PE=3 SV=1 - [E9QIS0_MOUSE]   | 11.25 | 5 | 1  | 1  | 2   | 1.06 | 1.01 | 0.95 | 1.08 | 1.02 | 0.94 | 0.88 | 1.01 | 0.95 | 0.89 | 0.84 | 0.89 | 0.85 | 18.69  | 8.13  |
| E9Q9X4 | Nitric oxide synthase OS=Mus musculus GN=Nos3 PE=2 SV=1 - [E9Q9X4_MOUSE]                        | 1.63  | 2 | 1  | 1  | 1   | 1.22 | 1.25 | 1.02 | 1.10 | 0.90 | 0.88 | 0.71 | 1.01 | 0.82 | 1.04 | 0.86 | 1.16 | 0.95 | 122.02 | 7.52  |
| P62852 | 40S ribosomal protein S25 OS=Mus musculus GN=Rps25 PE=2 SV=1 - [RS25_MOUSE]                     | 24.00 | 1 | 4  | 4  | 7   | 0.98 | 0.71 | 0.70 | 1.04 | 0.95 | 1.06 | 0.96 | 1.01 | 1.01 | 1.02 | 1.00 | 0.86 | 0.88 | 13.73  | 10.11 |

|        |                                                                                                                    |       |   |    |    |     |      |      |      |      |      |      |      |      |      |      |      |      |      |        |       |
|--------|--------------------------------------------------------------------------------------------------------------------|-------|---|----|----|-----|------|------|------|------|------|------|------|------|------|------|------|------|------|--------|-------|
| P62918 | 60S ribosomal protein L8 OS=Mus musculus GN=Rpl8 PE=2 SV=2 - [RL8_MOUSE]                                           | 35.02 | 1 | 5  | 5  | 12  | 1.07 | 1.01 | 1.01 | 1.07 | 1.04 | 0.99 | 1.01 | 1.01 | 0.98 | 0.97 | 1.00 | 1.04 | 1.05 | 28.01  | 11.03 |
| E9Q7E2 | Protein Arid2 OS=Mus musculus GN=Arid2 PE=2 SV=1 - [E9Q7E2_MOUSE]                                                  | 1.04  | 1 | 2  | 2  | 4   | 1.05 | 1.57 | 1.17 | 1.12 | 1.06 | 1.15 | 1.08 | 1.01 | 1.01 | 1.18 | 1.19 | 1.06 | 1.12 | 195.87 | 7.47  |
| P10630 | Eukaryotic initiation factor 4A-II OS=Mus musculus GN=Eif4a2 PE=2 SV=2 - [IF4A2_MOUSE]                             | 51.35 | 6 | 9  | 18 | 80  | 1.01 | 0.93 | 0.91 | 1.16 | 1.17 | 1.00 | 0.99 | 1.01 | 0.98 | 0.99 | 0.98 | 1.08 | 0.98 | 46.37  | 5.48  |
| B2RQS1 | Striatin-3 OS=Mus musculus GN=Strn3 PE=2 SV=1 - [B2RQS1_MOUSE]                                                     | 24.58 | 2 | 11 | 12 | 30  | 1.07 | 1.08 | 1.00 | 1.05 | 1.00 | 1.01 | 1.01 | 1.01 | 0.97 | 0.96 | 0.99 | 0.99 | 0.92 | 77.68  | 5.22  |
| Q91YR5 | Isoform 3 of Methyltransferase-like protein 13 OS=Mus musculus GN=Mettl13 [MET13_MOUSE]                            | 7.55  | 3 | 1  | 1  | 2   | 0.95 | 1.07 | 1.13 | 1.05 | 1.11 | 0.89 | 0.93 | 1.01 | 1.06 | 0.96 | 1.01 | 0.99 | 1.04 | 36.07  | 6.65  |
| Q4VC33 | Macrophage erythroblast attacher OS=Mus musculus GN=Maea PE=1 SV=1 - [MAEA_MOUSE]                                  | 5.56  | 2 | 2  | 2  | 8   | 0.96 | 1.25 | 1.20 | 1.01 | 1.06 | 0.95 | 0.93 | 1.01 | 0.96 | 0.90 | 0.89 | 1.00 | 1.07 | 45.31  | 8.69  |
| Q3UHN9 | Bifunctional heparan sulfate N-deacetylase/N-sulfotransferase 1 OS=Mus musculus GN=Ndst1 PE=1 SV=2 - [NDST1_MOUSE] | 1.36  | 1 | 1  | 1  | 1   | 0.97 | 1.00 | 1.03 | 0.65 | 0.67 | 0.96 | 0.98 | 1.01 | 1.03 | 0.74 | 0.77 | 0.74 | 0.76 | 100.66 | 7.77  |
| Q8R5M8 | Isoform 4 of Cell adhesion molecule 1 OS=Mus musculus GN=Cadm1 - [CADM1_MOUSE]                                     | 48.92 | 8 | 3  | 15 | 341 | 1.38 | 0.94 | 0.87 | 1.04 | 0.91 | 1.17 | 0.92 | 1.01 | 1.00 | 1.14 | 0.91 | 1.11 | 1.09 | 45.75  | 5.12  |
| Q6P5F6 | Zinc transporter ZIP10 OS=Mus musculus GN=Slc39a10 PE=1 SV=1 - [S39AA_MOUSE]                                       | 13.09 | 2 | 10 | 10 | 26  | 1.05 | 0.94 | 0.91 | 1.00 | 0.92 | 1.01 | 0.95 | 1.01 | 0.99 | 1.03 | 0.97 | 1.01 | 0.92 | 94.33  | 6.71  |
| P22907 | Porphobilinogen deaminase OS=Mus musculus GN=Hmbs PE=2 SV=2 - [HEM3_MOUSE]                                         | 15.79 | 2 | 4  | 4  | 6   | 1.01 | 0.92 | 0.98 | 0.98 | 0.97 | 1.05 | 1.06 | 1.01 | 0.96 | 1.05 | 1.04 | 1.09 | 1.05 | 39.32  | 6.87  |
| Q9CQK7 | RWD domain-containing protein 1 OS=Mus musculus GN=Rwdd1 PE=1 SV=1 - [RWDD1_MOUSE]                                 | 11.93 | 1 | 4  | 4  | 10  | 1.02 | 0.68 | 0.81 | 0.75 | 0.84 | 1.01 | 0.96 | 1.01 | 0.91 | 0.96 | 0.80 | 0.78 | 0.78 | 27.77  | 4.26  |
| D3YZI9 | Protein Pgbd5 OS=Mus musculus GN=Pgbd5 PE=2 SV=1 - [D3YZI9_MOUSE]                                                  | 12.81 | 3 | 4  | 4  | 10  | 1.03 | 1.23 | 1.06 | 1.12 | 1.08 | 0.90 | 0.85 | 1.01 | 0.95 | 1.03 | 0.90 | 1.20 | 1.10 | 58.26  | 8.85  |
| Q8BGZ1 | Hippocalcin-like protein 4 OS=Mus musculus GN=Hpcal4 PE=2 SV=3 - [HPCL4_MOUSE]                                     | 83.25 | 2 | 11 | 14 | 156 | 1.11 | 0.85 | 0.80 | 0.94 | 0.84 | 1.03 | 0.92 | 1.01 | 0.91 | 0.99 | 0.93 | 1.10 | 1.00 | 22.20  | 4.89  |

|          |                                                                                                             |       |   |    |    |     |      |      |      |      |      |      |      |      |      |      |      |      |      |        |      |
|----------|-------------------------------------------------------------------------------------------------------------|-------|---|----|----|-----|------|------|------|------|------|------|------|------|------|------|------|------|------|--------|------|
| P19783   | Cytochrome c oxidase subunit 4 isoform 1, mitochondrial OS=Mus musculus GN=Cox4i1 PE=1 SV=2 - [COX41_MOUSE] | 57.99 | 3 | 9  | 9  | 104 | 0.97 | 1.15 | 1.14 | 1.12 | 1.12 | 1.01 | 1.01 | 1.01 | 1.02 | 1.01 | 1.04 | 1.03 | 1.06 | 19.52  | 9.23 |
| Q9R0P5   | Dextrin OS=Mus musculus GN=Dstn PE=1 SV=3 - [DEST_MOUSE]                                                    | 73.33 | 1 | 12 | 13 | 72  | 0.85 | 0.75 | 0.90 | 0.74 | 0.87 | 0.87 | 1.00 | 1.01 | 1.22 | 0.81 | 0.97 | 0.86 | 1.03 | 18.51  | 7.97 |
| P62500-2 | Isoform 2 of TSC22 domain family protein 1 OS=Mus musculus GN=Tsc22d1 - [T22D1_MOUSE]                       | 30.07 | 4 | 1  | 4  | 47  | 0.94 | 0.88 | 0.94 | 0.78 | 0.83 | 1.01 | 1.08 | 1.01 | 1.07 | 1.05 | 1.13 | 1.03 | 1.11 | 15.57  | 5.20 |
| Q91ZX7   | Prolow-density lipoprotein receptor-related protein 1 OS=Mus musculus GN=Lrp1 PE=1 SV=1 - [LRP1_MOUSE]      | 29.39 | 3 | 94 | 95 | 288 | 1.01 | 0.99 | 1.01 | 0.98 | 0.96 | 0.96 | 0.93 | 1.01 | 1.01 | 0.92 | 0.93 | 0.99 | 0.96 | 504.41 | 5.36 |
| Q922S8   | Kinesin-like protein KIF2C OS=Mus musculus GN=Kif2c PE=1 SV=1 - [KIF2C_MOUSE]                               | 3.61  | 2 | 1  | 2  | 2   | 1.13 | 1.05 | 0.93 | 1.17 | 1.03 | 0.85 | 0.75 | 1.01 | 0.89 | 1.02 | 0.90 | 1.20 | 1.06 | 81.03  | 7.97 |
| Q923Z0   | G-protein coupled receptor family C group 5 member B OS=Mus musculus GN=Gprc5b PE=2 SV=1 - [GPC5B_MOUSE]    | 15.85 | 1 | 4  | 4  | 26  | 1.05 | 1.18 | 1.15 | 0.98 | 0.93 | 1.01 | 0.94 | 1.01 | 0.96 | 1.03 | 0.99 | 1.08 | 1.01 | 45.87  | 8.38 |
| P09581   | Macrophage colony-stimulating factor 1 receptor OS=Mus musculus GN=Csf1r PE=1 SV=3 - [CSF1R_MOUSE]          | 1.54  | 1 | 1  | 1  | 1   | 0.91 | 0.71 | 0.78 | 0.94 | 1.03 | 1.00 | 1.09 | 1.01 | 1.10 | 0.86 | 0.94 | 0.91 | 1.01 | 109.11 | 6.21 |
| Q9DBC0   | Selenoprotein O OS=Mus musculus GN=Selo PE=1 SV=4 - [SELO_MOUSE]                                            | 5.55  | 1 | 3  | 3  | 5   | 0.89 | 1.07 | 1.22 | 1.04 | 1.19 | 0.91 | 1.04 | 1.01 | 1.15 | 0.97 | 1.12 | 1.10 | 1.24 | 74.18  | 5.83 |
| Q99MJ9   | ATP-dependent RNA helicase DDX50 OS=Mus musculus GN=Ddx50 PE=2 SV=1 - [DDX50_MOUSE]                         | 2.45  | 1 | 2  | 2  | 2   | 0.95 | 1.03 | 1.08 | 1.03 | 1.08 | 0.97 | 1.01 | 1.01 | 1.05 | 1.22 | 1.28 | 1.17 | 1.23 | 82.12  | 9.25 |
| Q9CPQ3   | Mitochondrial import receptor subunit TOM22 homolog OS=Mus musculus GN=Tom22 PE=2 SV=3 - [TOM22_MOUSE]      | 47.18 | 1 | 4  | 4  | 7   | 1.08 | 1.14 | 1.01 | 1.10 | 1.06 | 0.91 | 0.95 | 1.01 | 1.02 | 0.97 | 0.98 | 1.07 | 1.04 | 15.53  | 4.34 |
| P22437   | Prostaglandin G/H synthase 1 OS=Mus musculus GN=Ptgs1 PE=2 SV=1 - [PGH1_MOUSE]                              | 4.82  | 1 | 2  | 2  | 3   | 0.90 | 1.81 | 2.00 | 1.04 | 1.15 | 0.93 | 1.02 | 1.01 | 1.11 | 0.97 | 1.08 | 1.02 | 0.66 | 69.00  | 6.83 |
| Q62101   | Serine/threonine-protein kinase D1 OS=Mus musculus GN=Prkd1 PE=1 SV=2 - [KPCD1_MOUSE]                       | 1.42  | 1 | 1  | 1  | 1   | 1.08 | 1.38 | 1.27 | 1.22 | 1.13 | 1.05 | 0.97 | 1.01 | 0.93 | 1.09 | 1.00 | 1.27 | 1.17 | 101.97 | 6.58 |

|         |                                                                                                                       |       |   |    |    |    |      |      |      |      |      |      |      |      |      |      |      |      |      |        |      |
|---------|-----------------------------------------------------------------------------------------------------------------------|-------|---|----|----|----|------|------|------|------|------|------|------|------|------|------|------|------|------|--------|------|
| Q61749  | Translation initiation factor eIF-2B subunit delta OS=Mus musculus GN=Eif2b4 PE=2 SV=2 - [E12BD_MOUSE]                | 14.12 | 3 | 5  | 6  | 28 | 0.90 | 0.99 | 1.22 | 1.04 | 1.19 | 1.02 | 1.17 | 1.01 | 1.06 | 1.07 | 1.25 | 0.98 | 1.19 | 57.59  | 9.25 |
| Q8K2M0  | 39S ribosomal protein L38, mitochondrial OS=Mus musculus GN=Mrlp38 PE=2 SV=2 - [RM38_MOUSE]                           | 6.84  | 2 | 2  | 2  | 4  | 1.10 | 1.01 | 1.10 | 1.13 | 1.09 | 1.15 | 1.08 | 1.01 | 0.99 | 1.11 | 1.05 | 1.15 | 1.09 | 45.00  | 8.10 |
| Q80VP9  | Aspartate beta-hydroxylase domain-containing protein 2 OS=Mus musculus GN=Asphd2 PE=2 SV=1 - [ASPH2_MOUSE]            | 3.21  | 1 | 1  | 1  | 2  | 0.96 | 1.03 | 1.06 | 1.06 | 1.10 | 0.74 | 0.76 | 1.01 | 1.04 | 1.00 | 1.04 | 1.09 | 1.14 | 38.71  | 7.05 |
| Q61418  | H(+)/Cl(-) exchange transporter 4 OS=Mus musculus GN=Clcn4 PE=2 SV=2 - [CLCN4_MOUSE]                                  | 7.10  | 1 | 3  | 3  | 9  | 1.13 | 1.00 | 0.94 | 1.11 | 0.95 | 1.04 | 0.89 | 1.01 | 0.93 | 1.02 | 0.92 | 1.03 | 0.96 | 83.68  | 6.86 |
| Q6PGB6- | Isoform 3 of N-alpha-acetyltransferase 50 OS=Mus musculus GN=Naa50 - [NAA50_MOUSE]                                    | 25.58 | 5 | 3  | 3  | 5  | 1.02 | 0.83 | 0.79 | 1.02 | 0.96 | 1.03 | 1.00 | 1.01 | 0.99 | 0.93 | 0.97 | 0.89 | 0.84 | 14.89  | 8.56 |
| D3Z2W1  | Protein Dgki OS=Mus musculus GN=Dgki PE=2 SV=1 - [D3Z2W1_MOUSE]                                                       | 18.38 | 3 | 11 | 11 | 21 | 1.01 | 1.07 | 1.08 | 0.97 | 1.02 | 1.00 | 1.02 | 1.01 | 1.03 | 0.99 | 1.04 | 1.10 | 1.13 | 115.89 | 7.85 |
| F6Z458  | Endoplasmic reticulum lectin 1 (Fragment) OS=Mus musculus GN=Erlec1 PE=2 SV=1 - [F6Z458_MOUSE]                        | 9.66  | 2 | 1  | 1  | 1  | 0.99 | 1.65 | 1.66 | 1.28 | 1.29 | 1.24 | 1.25 | 1.01 | 1.01 | 1.00 | 1.01 | 1.03 | 1.04 | 27.25  | 7.49 |
| Q3USC7  | Ganglioside-induced differentiation-associated protein 1-like 1 OS=Mus musculus GN=Gdap111 PE=2 SV=1 - [Q3USC7_MOUSE] | 28.61 | 3 | 6  | 7  | 25 | 1.02 | 1.01 | 0.96 | 1.07 | 1.07 | 1.04 | 0.99 | 1.01 | 0.96 | 0.90 | 0.95 | 1.07 | 1.01 | 41.89  | 6.48 |
| Q9CX53  | Gem-associated protein 6 OS=Mus musculus GN=Gemin6 PE=2 SV=2 - [GEM16_MOUSE]                                          | 16.27 | 1 | 3  | 3  | 4  | 1.22 | 1.09 | 0.83 | 0.90 | 0.73 | 0.96 | 0.89 | 1.01 | 0.87 | 0.90 | 0.78 | 0.91 | 0.74 | 18.74  | 5.25 |
| D3Z0F5  | COP9 signalosome complex subunit 6 OS=Mus musculus GN=Cops6 PE=2 SV=1 - [D3Z0F5_MOUSE]                                | 19.19 | 3 | 4  | 4  | 14 | 1.13 | 1.13 | 0.84 | 1.03 | 0.96 | 0.98 | 0.90 | 1.01 | 0.87 | 0.94 | 0.88 | 1.07 | 0.97 | 33.57  | 6.00 |
| Q5SUH6  | Clahterin interactor 1 OS=Mus musculus GN=Clint1 PE=4 SV=1 - [Q5SUH6_MOUSE]                                           | 29.80 | 4 | 16 | 16 | 63 | 1.07 | 0.86 | 0.81 | 0.95 | 0.88 | 1.00 | 0.92 | 1.01 | 0.94 | 0.95 | 0.89 | 0.88 | 0.80 | 69.71  | 6.65 |



|        |                                                                                                                            |       |    |    |    |      |      |      |      |      |      |      |      |      |      |      |      |      |      |        |      |
|--------|----------------------------------------------------------------------------------------------------------------------------|-------|----|----|----|------|------|------|------|------|------|------|------|------|------|------|------|------|------|--------|------|
| Q6P5F7 | Protein tweety homolog 3 OS=Mus musculus GN=Tyh3 PE=1 SV=1 - [TTYH3_MOUSE]                                                 | 10.31 | 2  | 4  | 4  | 6    | 1.04 | 1.15 | 1.08 | 1.06 | 1.07 | 0.97 | 0.93 | 1.01 | 1.02 | 1.07 | 1.08 | 0.99 | 1.01 | 57.68  | 5.85 |
| Q9R0M6 | Ras-related protein Rab 9A OS=Mus musculus GN=Rab9a PE=1 SV=1 - [RAB9A_MOUSE]                                              | 24.38 | 2  | 3  | 3  | 10   | 1.03 | 1.22 | 1.33 | 1.05 | 1.05 | 1.05 | 1.02 | 1.01 | 0.94 | 1.02 | 0.91 | 1.08 | 1.01 | 22.90  | 5.66 |
| E9Q3E8 | Pituitary adenylate cyclase-activating polypeptide type 1 receptor OS=Mus musculus GN=Adcyap1r1 PE=2 SV=1 - [E9Q3E8_MOUSE] | 3.36  | 7  | 2  | 2  | 2    | 1.30 | 1.35 | 1.03 | 1.10 | 0.84 | 1.25 | 0.95 | 1.01 | 0.77 | 1.18 | 0.91 | 1.28 | 0.99 | 51.13  | 6.60 |
| Q4JJC0 | PAR3 splice variant (Fragment) OS=Mus musculus GN=Pard3 PE=2 SV=1 - [Q4JJC0_MOUSE]                                         | 3.32  | 19 | 1  | 1  | 5    | 1.20 | 1.07 | 0.89 | 1.11 | 0.92 | 1.25 | 1.03 | 1.01 | 0.83 | 1.32 | 1.10 | 1.32 | 1.09 | 46.09  | 9.06 |
| A2AKI5 | Integrin alpha-V light chain OS=Mus musculus GN=Itgav PE=2 SV=1 - [A2AKI5_MOUSE]                                           | 19.25 | 4  | 16 | 16 | 31   | 1.07 | 0.92 | 0.94 | 1.09 | 1.01 | 1.07 | 1.01 | 1.01 | 0.95 | 1.03 | 0.96 | 1.03 | 1.01 | 111.44 | 5.67 |
| Q8BYI8 | Uncharacterized protein KIAA1467 OS=Mus musculus GN=Kiaa1467 PE=2 SV=1 - [K1467_MOUSE]                                     | 10.90 | 2  | 4  | 4  | 7    | 0.94 | 0.94 | 0.99 | 1.00 | 1.00 | 1.11 | 1.10 | 1.01 | 1.04 | 0.97 | 1.10 | 0.97 | 1.03 | 66.99  | 5.03 |
| Q8C7X2 | Isoform 2 of ER membrane protein complex subunit 1 OS=Mus musculus GN=Emc1 - [EMC1_MOUSE]                                  | 12.37 | 3  | 8  | 8  | 15   | 0.89 | 1.19 | 1.13 | 1.10 | 1.14 | 0.92 | 1.01 | 1.01 | 0.89 | 0.99 | 1.05 | 1.19 | 1.03 | 111.22 | 7.43 |
| Q9JIS5 | Synaptic vesicle glycoprotein 2A OS=Mus musculus GN=Sv2a PE=1 SV=1 - [SV2A_MOUSE]                                          | 24.39 | 1  | 15 | 15 | 232  | 1.00 | 1.20 | 1.17 | 1.07 | 1.12 | 0.92 | 0.91 | 1.01 | 0.99 | 0.96 | 1.00 | 0.98 | 0.97 | 82.59  | 5.57 |
| Q8C7X8 | Brain protein I3 OS=Mus musculus GN=Bri3 PE=4 SV=1 - [Q8C7X8_MOUSE]                                                        | 16.00 | 3  | 1  | 1  | 1    | 1.19 | 1.20 | 1.01 | 1.31 | 1.10 | 0.95 | 0.79 | 1.01 | 0.85 | 1.08 | 0.91 | 1.11 | 0.94 | 11.06  | 8.32 |
| Q8R554 | OTU domain-containing protein 7A OS=Mus musculus GN=Otud7a PE=2 SV=1 - [OTU7A_MOUSE]                                       | 7.88  | 2  | 3  | 5  | 9    | 1.02 | 1.12 | 1.10 | 0.88 | 1.04 | 1.13 | 1.10 | 1.01 | 1.05 | 1.04 | 1.17 | 1.03 | 1.00 | 100.73 | 8.22 |
| Q9D6F9 | Tubulin beta-4A chain OS=Mus musculus GN=Tubb4a PE=1 SV=3 - [TBB4A_MOUSE]                                                  | 75.68 | 1  | 6  | 27 | 1891 | 0.98 | 0.96 | 0.99 | 1.03 | 1.05 | 1.02 | 1.03 | 1.01 | 1.02 | 1.01 | 1.03 | 1.01 | 1.04 | 49.55  | 4.88 |

|          |                                                                                                                                          |       |   |    |    |    |      |      |      |      |      |      |      |      |      |      |      |      |      |        |      |
|----------|------------------------------------------------------------------------------------------------------------------------------------------|-------|---|----|----|----|------|------|------|------|------|------|------|------|------|------|------|------|------|--------|------|
| A2AHB7   | Potassium channel subfamily T member 1<br>OS=Mus musculus<br>GN=Kcnt1 PE=2<br>SV=1 -<br>[A2AHB7_MOUSE]                                   | 4.19  | 6 | 3  | 3  | 8  | 0.96 | 1.12 | 1.16 | 0.96 | 1.00 | 0.94 | 0.96 | 1.01 | 1.21 | 1.05 | 1.17 | 1.01 | 1.11 | 137.27 | 7.46 |
| P0C0A3   | Charged multivesicular body protein 6<br>OS=Mus musculus<br>GN=Chmp6 PE=2<br>SV=2 -<br>[CHMP6_MOUSE]                                     | 22.50 | 3 | 3  | 4  | 10 | 1.02 | 0.96 | 1.02 | 1.01 | 1.07 | 0.91 | 0.90 | 1.01 | 1.06 | 0.97 | 1.05 | 0.89 | 0.96 | 23.40  | 5.44 |
| O08810   | 116 kDa U5 small nuclear ribonucleoprotein component<br>OS=Mus musculus<br>GN=Eftud2 PE=2<br>SV=1 -<br>[U5S1_MOUSE]                      | 32.54 | 4 | 21 | 22 | 63 | 1.04 | 1.12 | 1.12 | 1.06 | 1.05 | 1.00 | 1.00 | 1.01 | 1.05 | 1.04 | 1.00 | 1.08 | 1.01 | 109.29 | 5.00 |
| Q8BUY3   | Gephyrin OS=Mus musculus<br>GN=Gphn PE=1<br>SV=2 -<br>[GEPH_MOUSE]                                                                       | 43.43 | 2 | 22 | 22 | 61 | 0.98 | 0.93 | 0.97 | 1.06 | 1.05 | 0.97 | 1.00 | 1.01 | 0.94 | 1.00 | 1.01 | 1.01 | 0.97 | 83.23  | 5.60 |
| O55201   | Transcription elongation factor SPT5<br>OS=Mus musculus<br>GN=Supt5h PE=1<br>SV=1 -<br>[SPT5H_MOUSE]                                     | 14.88 | 2 | 9  | 9  | 18 | 1.02 | 0.97 | 0.99 | 1.02 | 1.01 | 1.00 | 1.00 | 1.01 | 1.02 | 1.05 | 1.02 | 1.07 | 1.04 | 120.59 | 5.05 |
| E9Q933   | Transmembrane protein 11, mitochondrial<br>OS=Mus musculus<br>GN=Tmem11 PE=2<br>SV=1 -<br>[E9Q933_MOUSE]                                 | 4.55  | 2 | 1  | 1  | 2  | 1.08 | 1.42 | 1.32 | 1.53 | 1.42 | 1.01 | 0.93 | 1.01 | 0.94 | 1.11 | 1.03 | 0.96 | 0.90 | 19.80  | 6.25 |
| Q8K3H0   | DCC-interacting protein 13-alpha<br>OS=Mus musculus<br>GN=App11 PE=1<br>SV=1 -<br>[DP13A_MOUSE]                                          | 29.28 | 1 | 15 | 16 | 42 | 1.00 | 1.10 | 1.11 | 1.02 | 1.01 | 0.97 | 0.99 | 1.01 | 1.00 | 0.98 | 1.03 | 1.06 | 1.06 | 79.28  | 5.41 |
| Q8BUY5   | Translocase of inner mitochondrial membrane domain-containing protein 1<br>OS=Mus musculus<br>GN=Timmdc1 PE=2<br>SV=1 -<br>[TIDC1_MOUSE] | 5.26  | 1 | 1  | 1  | 1  | 0.98 | 1.09 | 1.11 | 0.95 | 0.96 | 1.05 | 1.06 | 1.01 | 1.03 | 0.93 | 0.95 | 1.11 | 1.13 | 31.77  | 9.29 |
| Q8VES2   | Opioid growth factor receptor-like protein 1<br>OS=Mus musculus<br>GN=Ogfr11 PE=2<br>SV=2 -<br>[OGRL1_MOUSE]                             | 7.11  | 1 | 3  | 3  | 3  | 0.97 | 1.10 | 1.13 | 1.09 | 1.11 | 1.01 | 1.02 | 1.01 | 1.04 | 1.02 | 1.04 | 1.07 | 1.09 | 52.24  | 6.57 |
| Q8R310-2 | Isoform 2 of Transmembrane and coiled-coil domains protein 3<br>OS=Mus musculus<br>GN=Tmcc3 -<br>[TMCC3_MOUSE]                           | 2.69  | 2 | 1  | 1  | 2  | 1.17 | 1.20 | 1.02 | 1.17 | 0.99 | 1.05 | 0.89 | 1.01 | 0.86 | 1.27 | 1.08 | 1.17 | 0.99 | 50.14  | 8.56 |

|         |                                                                                                                                          |       |   |    |    |    |      |      |      |      |      |      |      |      |      |      |      |      |      |        |       |
|---------|------------------------------------------------------------------------------------------------------------------------------------------|-------|---|----|----|----|------|------|------|------|------|------|------|------|------|------|------|------|------|--------|-------|
| Q56A08  | G patch domain and KOW motifs-containing protein<br>OS=Mus musculus<br>GN=Gpkow PE=2<br>SV=2 -<br>[GPKOW_MOUSE]                          | 1.84  | 1 | 1  | 1  | 2  | 0.98 | 1.20 | 1.22 | 0.93 | 0.94 | 1.16 | 1.18 | 1.01 | 1.03 | 0.96 | 0.98 | 0.87 | 0.89 | 53.80  | 8.07  |
| Q05D44  | Eukaryotic translation initiation factor 5B<br>OS=Mus musculus<br>GN=Elf5b PE=1 SV=2<br>- [IF2P_MOUSE]                                   | 14.72 | 1 | 13 | 13 | 32 | 1.04 | 0.91 | 0.87 | 1.04 | 0.99 | 1.03 | 0.96 | 1.01 | 0.96 | 1.00 | 0.98 | 1.03 | 0.96 | 137.53 | 5.59  |
| G3UXX3  | Septipierin reductase<br>OS=Mus musculus<br>GN=Spr PE=2 SV=1 -<br>[G3UXX3_MOUSE]                                                         | 51.14 | 5 | 9  | 9  | 31 | 0.99 | 1.05 | 0.94 | 1.09 | 1.07 | 1.02 | 1.02 | 1.01 | 1.01 | 1.11 | 1.14 | 1.13 | 1.19 | 23.34  | 6.21  |
| P58158  | Galactosylgalactosyl<br>osylprotein 3-beta-<br>glucuronosyltransferase<br>3 OS=Mus musculus<br>GN=B3gat3 PE=2<br>SV=1 -<br>[B3GA3_MOUSE] | 4.18  | 1 | 1  | 1  | 2  | 1.01 | 1.35 | 1.33 | 1.39 | 1.37 | 0.98 | 0.96 | 1.01 | 0.99 | 0.88 | 0.87 | 1.03 | 1.02 | 37.04  | 8.78  |
| H3BKM2  | Nuclear-interacting<br>partner of ALK<br>OS=Mus musculus<br>GN=Zc3hc1 PE=2<br>SV=1 -<br>[H3BKM2_MOUSE]                                   | 8.28  | 4 | 2  | 2  | 4  | 0.87 | 0.99 | 1.13 | 1.12 | 1.28 | 1.05 | 1.20 | 1.01 | 1.15 | 1.04 | 1.19 | 1.03 | 1.18 | 50.48  | 5.50  |
| O55003  | BCL2/adenovirus E1B<br>19 kDa protein-<br>interacting protein 3<br>OS=Mus musculus<br>GN=Bnip3 PE=1<br>SV=1 -<br>[BNIP3_MOUSE]           | 3.74  | 1 | 1  | 1  | 1  | 1.08 | 0.89 | 0.83 | 0.94 | 0.88 | 1.02 | 0.94 | 1.01 | 0.94 | 0.84 | 0.78 | 0.88 | 0.82 | 20.97  | 7.14  |
| Q3U6N9- | Isoform 2 of UPF0488<br>protein C8orf33<br>homolog OS=Mus<br>musculus -<br>[CH033_MOUSE]                                                 | 10.06 | 3 | 1  | 1  | 2  | 1.03 | 1.11 | 1.07 | 0.93 | 0.90 | 0.97 | 0.93 | 1.01 | 0.98 | 1.05 | 1.02 | 0.95 | 0.92 | 17.99  | 10.24 |
| Q8C0T5  | Signal-induced<br>proliferation-associated<br>1-like protein 1<br>OS=Mus musculus<br>GN=Sipa111 PE=1<br>SV=2 -<br>[S111L1_MOUSE]         | 19.42 | 4 | 24 | 25 | 75 | 0.96 | 0.95 | 1.01 | 0.98 | 1.02 | 1.00 | 1.07 | 1.01 | 1.07 | 0.96 | 1.03 | 0.94 | 0.98 | 196.91 | 8.13  |
| P81117  | Nucleobindin-2<br>OS=Mus musculus<br>GN=Nucb2 PE=1<br>SV=2 -<br>[NUCB2_MOUSE]                                                            | 50.95 | 1 | 15 | 15 | 55 | 1.05 | 0.87 | 0.84 | 0.92 | 0.84 | 1.14 | 1.07 | 1.01 | 0.97 | 1.03 | 0.97 | 0.92 | 0.86 | 50.27  | 5.15  |
| Q3UN90  | LYR motif-containing<br>protein 9 OS=Mus<br>musculus GN=Lym9<br>PE=2 SV=1 -<br>[LYRM9_MOUSE]                                             | 32.05 | 2 | 2  | 2  | 5  | 1.06 | 0.78 | 0.77 | 0.92 | 0.85 | 1.05 | 0.97 | 1.01 | 0.93 | 1.00 | 0.92 | 0.94 | 0.88 | 9.30   | 8.91  |
| Q8BYL4  | Tyrosine-tRNA ligase,<br>mitochondrial OS=Mus<br>musculus GN=Yars2<br>PE=2 SV=2 -<br>[SYYM_MOUSE]                                        | 1.48  | 1 | 1  | 1  | 3  | 1.02 | 1.26 | 1.23 | 1.00 | 0.98 | 1.01 | 0.98 | 1.01 | 0.98 | 1.20 | 1.18 | 1.40 | 1.37 | 52.56  | 9.16  |

|        |                                                                                                         |       |   |    |    |    |      |      |      |      |      |      |      |      |      |      |      |      |      |        |       |
|--------|---------------------------------------------------------------------------------------------------------|-------|---|----|----|----|------|------|------|------|------|------|------|------|------|------|------|------|------|--------|-------|
| P60229 | Eukaryotic translation initiation factor 3 subunit E OS=Mus musculus GN=EIF3e PE=1 SV=1 - [EIF3E_MOUSE] | 16.40 | 1 | 5  | 5  | 7  | 0.92 | 1.09 | 1.59 | 1.01 | 1.05 | 0.96 | 1.13 | 1.01 | 1.10 | 0.82 | 1.05 | 1.13 | 1.23 | 52.19  | 6.04  |
| Q9CQ08 | U6 snRNA-associated Sm-like protein LSM7 OS=Mus musculus GN=Lsm7 PE=3 SV=1 - [LSM7_MOUSE]               | 46.60 | 1 | 4  | 5  | 15 | 0.98 | 0.76 | 0.76 | 0.91 | 0.91 | 1.02 | 0.96 | 1.01 | 1.03 | 0.91 | 0.97 | 0.95 | 1.01 | 11.63  | 5.27  |
| Q99J36 | THUMP domain-containing protein 1 OS=Mus musculus GN=Thump1 PE=1 SV=1 - [THUM1_MOUSE]                   | 6.29  | 1 | 3  | 3  | 8  | 1.07 | 0.92 | 0.85 | 1.01 | 0.95 | 1.08 | 0.98 | 1.01 | 0.89 | 0.98 | 0.88 | 0.99 | 1.00 | 38.86  | 6.07  |
| Q80Z16 | E3 ubiquitin-protein ligase LRSAM1 OS=Mus musculus GN=Lrsam1 PE=2 SV=1 - [LRSM1_MOUSE]                  | 6.60  | 1 | 4  | 4  | 7  | 1.20 | 1.09 | 1.11 | 1.09 | 1.02 | 1.02 | 1.06 | 1.01 | 0.72 | 1.09 | 0.90 | 1.12 | 0.83 | 83.92  | 6.14  |
| Q8VDL4 | Isoform 3 of ADP-dependent glucokinase OS=Mus musculus GN=Adpgk - [ADPGK_MOUSE]                         | 6.46  | 3 | 2  | 2  | 4  | 1.12 | 1.46 | 1.30 | 1.13 | 1.01 | 1.04 | 0.93 | 1.01 | 0.90 | 1.22 | 1.09 | 1.26 | 1.13 | 53.74  | 5.62  |
| P50580 | Proliferation-associated protein 2G4 OS=Mus musculus GN=Pa2g4 PE=1 SV=3 - [PA2G4_MOUSE]                 | 45.94 | 2 | 14 | 14 | 45 | 0.95 | 0.98 | 1.08 | 1.05 | 1.09 | 1.01 | 1.04 | 1.01 | 1.06 | 0.96 | 1.00 | 0.95 | 1.00 | 43.67  | 6.86  |
| P47911 | 60S ribosomal protein L6 OS=Mus musculus GN=Rpl6 PE=1 SV=3 - [RL6_MOUSE]                                | 26.35 | 2 | 7  | 7  | 19 | 0.94 | 0.85 | 0.94 | 0.97 | 1.04 | 1.00 | 1.12 | 1.01 | 1.13 | 1.01 | 1.06 | 0.93 | 1.00 | 33.49  | 10.70 |
| Q78RX3 | Small integral membrane protein 12 OS=Mus musculus GN=Smim12 PE=3 SV=1 - [SIM12_MOUSE]                  | 18.48 | 1 | 2  | 2  | 3  | 1.11 | 0.63 | 0.56 | 1.04 | 0.93 | 1.09 | 0.98 | 1.01 | 0.90 | 0.95 | 0.85 | 0.74 | 0.66 | 10.79  | 9.04  |
| A2ADA6 | Protein Acap3 OS=Mus musculus GN=Acap3 PE=2 SV=1 - [A2ADA6_MOUSE]                                       | 3.74  | 2 | 1  | 2  | 2  | 1.62 | 0.77 | 0.47 | 1.48 | 0.91 | 0.92 | 0.57 | 1.01 | 0.62 | 1.07 | 0.66 | 0.96 | 0.60 | 92.28  | 6.02  |
| Q8BTU1 | UPF0468 protein C16orf80 homolog OS=Mus musculus GN=Gtl3 PE=2 SV=1 - [CP080_MOUSE]                      | 6.22  | 1 | 1  | 1  | 2  | 1.14 | 1.25 | 1.09 | 1.01 | 0.88 | 1.29 | 1.12 | 1.01 | 0.88 | 1.15 | 1.01 | 1.09 | 0.95 | 22.73  | 9.76  |
| Q5XG73 | Isoform 2 of Acyl-CoA-binding domain-containing protein 5 OS=Mus musculus GN=Acbd5 - [ACBD5_MOUSE]      | 6.36  | 4 | 3  | 3  | 4  | 0.96 | 1.29 | 1.34 | 1.00 | 1.02 | 0.98 | 1.06 | 1.01 | 1.05 | 1.02 | 1.07 | 1.08 | 1.12 | 52.34  | 5.29  |
| F6S7W6 | Serine/threonine-protein kinase SIK3 (Fragment) OS=Mus musculus GN=Silk3 PE=2 SV=1 - [F6S7W6_MOUSE]     | 11.52 | 7 | 10 | 10 | 24 | 0.96 | 1.11 | 1.01 | 1.08 | 1.11 | 1.02 | 1.00 | 1.01 | 1.03 | 1.07 | 1.06 | 1.04 | 1.06 | 144.70 | 6.81  |

|        |                                                                                                                     |       |   |    |    |    |      |      |      |      |      |      |      |      |      |      |      |      |      |        |      |
|--------|---------------------------------------------------------------------------------------------------------------------|-------|---|----|----|----|------|------|------|------|------|------|------|------|------|------|------|------|------|--------|------|
| Q9JKR6 | Hypoxia up-regulated protein 1 OS=Mus musculus GN=Hyou1 PE=1 SV=1 - [HYOU1_MOUSE]                                   | 37.74 | 3 | 28 | 28 | 79 | 1.03 | 1.06 | 0.99 | 1.04 | 1.06 | 1.05 | 1.04 | 1.01 | 1.02 | 1.05 | 1.02 | 1.05 | 1.07 | 111.11 | 5.19 |
| G3UWG2 | T-cell lymphoma invasion and metastasis 1 OS=Mus musculus GN=Tiam1 PE=4 SV=1 - [G3UWG2_MOUSE]                       | 3.46  | 4 | 4  | 4  | 7  | 1.39 | 1.17 | 0.85 | 0.89 | 0.73 | 1.07 | 0.80 | 1.01 | 0.84 | 1.10 | 0.85 | 1.02 | 0.81 | 177.34 | 6.64 |
| Q9D9M2 | Isoform 2 of Ubiquitin carboxyl-terminal hydrolase 12 OS=Mus musculus GN=Usp12 - [UBP12_MOUSE]                      | 11.60 | 2 | 1  | 2  | 5  | 1.34 | 0.68 | 0.50 | 1.23 | 0.91 | 1.17 | 0.87 | 1.01 | 0.75 | 1.06 | 0.79 | 1.17 | 0.87 | 29.14  | 5.40 |
| P63141 | Potassium voltage-gated channel subfamily A member 2 OS=Mus musculus GN=Kcna2 PE=1 SV=1 - [KCNA2_MOUSE]             | 23.85 | 3 | 5  | 9  | 46 | 1.09 | 1.16 | 1.07 | 1.15 | 1.06 | 0.99 | 0.90 | 1.01 | 0.92 | 0.88 | 0.83 | 0.94 | 0.87 | 56.66  | 4.86 |
| P70232 | Neural cell adhesion molecule L1-like protein OS=Mus musculus GN=Chl1 PE=1 SV=2 - [CHL1_MOUSE]                      | 28.29 | 2 | 27 | 27 | 73 | 1.10 | 0.92 | 0.76 | 0.98 | 0.86 | 1.06 | 0.94 | 1.01 | 0.92 | 1.00 | 0.89 | 1.03 | 0.90 | 134.99 | 5.57 |
| Q8BKV8 | mTERF domain-containing protein 3, mitochondrial OS=Mus musculus GN=Mterf3 PE=1 SV=1 - [MTER3_MOUSE]                | 3.38  | 1 | 1  | 1  | 2  | 0.84 | 1.05 | 1.25 | 1.10 | 1.30 | 0.97 | 1.15 | 1.01 | 1.20 | 1.17 | 1.39 | 1.03 | 1.23 | 43.43  | 8.94 |
| Q91WQ3 | Tyrosine-tRNA ligase, cytoplasmic OS=Mus musculus GN=Yars PE=2 SV=3 - [SYYC_MOUSE]                                  | 45.83 | 3 | 21 | 21 | 43 | 0.96 | 0.97 | 1.05 | 1.01 | 1.06 | 1.01 | 1.04 | 1.01 | 1.06 | 0.98 | 1.04 | 0.99 | 1.05 | 59.07  | 7.01 |
| Q9D920 | Loss of heterozygosity 12 chromosomal region 1 protein homolog OS=Mus musculus GN=Loh12c1 PE=2 SV=1 - [L12R1_MOUSE] | 6.15  | 2 | 1  | 1  | 2  | 1.05 | 0.97 | 0.92 | 1.06 | 1.00 | 1.07 | 1.01 | 1.01 | 0.96 | 0.94 | 0.89 | 1.06 | 1.01 | 22.11  | 6.55 |
| Q99NB8 | Ubiquitin-4 OS=Mus musculus GN=Ubqln4 PE=1 SV=1 - [UBQL4_MOUSE]                                                     | 25.50 | 2 | 8  | 10 | 62 | 1.04 | 0.94 | 0.96 | 0.91 | 0.90 | 1.08 | 1.03 | 1.01 | 0.99 | 0.97 | 0.98 | 0.93 | 0.94 | 63.47  | 5.03 |
| J3QP43 | Protein 6330403A02Rik OS=Mus musculus GN=6330403A02Rik PE=4 SV=1 - [J3QP43_MOUSE]                                   | 21.28 | 2 | 2  | 2  | 57 | 1.07 | 1.08 | 0.94 | 1.08 | 0.97 | 1.14 | 1.06 | 1.01 | 0.93 | 1.10 | 1.04 | 1.20 | 1.12 | 15.01  | 6.51 |
| Q9DAM7 | UPF0444 transmembrane protein C12orf23 homolog OS=Mus musculus PE=2 SV=1 - [CL023_MOUSE]                            | 17.39 | 1 | 1  | 1  | 2  | 1.36 | 0.85 | 0.62 | 1.30 | 0.95 | 1.32 | 0.97 | 1.01 | 0.74 | 1.21 | 0.89 | 1.19 | 0.88 | 11.54  | 9.32 |

|         |                                                                                                                    |       |   |    |    |     |      |      |      |      |      |      |      |      |      |      |      |      |      |        |      |
|---------|--------------------------------------------------------------------------------------------------------------------|-------|---|----|----|-----|------|------|------|------|------|------|------|------|------|------|------|------|------|--------|------|
| Q6PGA0- | Isoform 2 of REST corepressor 3 OS=Mus musculus GN=Rcor3 - [RCOR3_MOUSE]                                           | 6.68  | 4 | 2  | 2  | 3   | 0.99 | 1.10 | 1.10 | 0.95 | 0.96 | 1.00 | 1.00 | 1.01 | 1.01 | 0.99 | 0.99 | 1.03 | 1.04 | 47.44  | 6.80 |
| Q9CWP8  | DNA polymerase delta subunit 4 OS=Mus musculus GN=Pold4 PE=2 SV=1 - [DPOD4_MOUSE]                                  | 9.35  | 1 | 1  | 1  | 2   | 0.93 | 0.68 | 0.73 | 0.91 | 0.97 | 0.89 | 0.95 | 1.01 | 1.08 | 1.03 | 1.11 | 1.01 | 1.09 | 12.40  | 6.52 |
| Q9CQZ6  | NADH dehydrogenase [ubiquinone] 1 beta subcomplex subunit 3 OS=Mus musculus GN=Ndufb3 PE=1 SV=1 - [NDUB3_MOUSE]    | 41.35 | 1 | 4  | 4  | 10  | 1.01 | 1.03 | 0.97 | 0.94 | 0.99 | 1.13 | 1.11 | 1.01 | 1.01 | 1.00 | 1.05 | 0.93 | 0.97 | 11.68  | 9.04 |
| Q9WU79  | Proline dehydrogenase 1, mitochondrial OS=Mus musculus GN=Prodh PE=2 SV=2 - [PROD_MOUSE]                           | 10.18 | 4 | 4  | 4  | 6   | 1.00 | 0.91 | 1.03 | 1.26 | 1.23 | 0.91 | 0.90 | 1.01 | 1.01 | 1.04 | 1.02 | 0.97 | 0.99 | 67.99  | 8.24 |
| Q8C3Q5- | Isoform 2 of Protein shisa-7 OS=Mus musculus GN=Shisa7 - [SHSA7_MOUSE]                                             | 24.40 | 3 | 9  | 9  | 35  | 1.06 | 1.01 | 0.98 | 0.99 | 0.96 | 1.11 | 1.03 | 1.01 | 0.96 | 1.03 | 1.02 | 1.00 | 1.02 | 56.39  | 9.86 |
| P23475  | X-ray repair cross-complementing protein 6 OS=Mus musculus GN=Xrcc6 PE=1 SV=5 - [XRCC6_MOUSE]                      | 2.30  | 1 | 1  | 1  | 2   | 0.91 | 0.91 | 1.00 | 0.92 | 1.01 | 1.11 | 1.22 | 1.01 | 1.11 | 0.99 | 1.09 | 1.03 | 1.13 | 69.44  | 6.79 |
| Q8VH51- | Isoform 3 of RNA-binding protein 39 OS=Mus musculus GN=Rbm39 - [RBM39_MOUSE]                                       | 15.26 | 6 | 4  | 4  | 7   | 0.89 | 0.94 | 1.11 | 1.15 | 1.20 | 0.97 | 1.03 | 1.01 | 1.09 | 1.02 | 1.23 | 1.01 | 1.19 | 39.79  | 6.55 |
| Q9CX54  | Centromere protein V OS=Mus musculus GN=Cenpv PE=2 SV=2 - [CENPV_MOUSE]                                            | 60.32 | 3 | 10 | 10 | 26  | 0.89 | 0.90 | 1.07 | 0.94 | 1.09 | 0.97 | 1.10 | 1.01 | 1.16 | 0.97 | 1.11 | 0.92 | 1.08 | 27.52  | 9.79 |
| P48036  | Annexin A5 OS=Mus musculus GN=Anxa5 PE=1 SV=1 - [ANXA5_MOUSE]                                                      | 57.99 | 1 | 16 | 16 | 53  | 1.00 | 1.06 | 1.02 | 1.03 | 1.02 | 0.98 | 0.96 | 1.01 | 0.99 | 1.04 | 1.05 | 1.05 | 1.03 | 35.73  | 4.96 |
| E9Q3N1  | High affinity cationic amino acid transporter 1 (Fragment) OS=Mus musculus GN=Slc7a1 PE=2 SV=1 - [E9Q3N1_MOUSE]    | 5.34  | 2 | 1  | 1  | 2   | 0.83 | 0.88 | 1.06 | 0.85 | 1.03 | 0.80 | 0.96 | 1.01 | 1.22 | 0.85 | 1.03 | 0.71 | 0.86 | 58.10  | 6.99 |
| Q8VDD5  | Myosin-9 OS=Mus musculus GN=Myh9 PE=1 SV=4 - [MYH9_MOUSE]                                                          | 41.07 | 2 | 55 | 70 | 267 | 0.94 | 0.89 | 0.98 | 1.04 | 1.14 | 0.99 | 1.06 | 1.01 | 1.08 | 1.04 | 1.12 | 1.01 | 1.11 | 226.23 | 5.66 |
| D3Z3A7  | Low-density lipoprotein receptor-related protein 11 (Fragment) OS=Mus musculus GN=Lrp11 PE=2 SV=1 - [D3Z3A7_MOUSE] | 7.02  | 4 | 2  | 2  | 4   | 1.06 | 0.75 | 0.70 | 0.94 | 0.88 | 0.82 | 0.77 | 1.01 | 0.95 | 0.72 | 0.68 | 0.94 | 0.89 | 44.36  | 7.66 |

|          |                                                                                                                                              |       |    |    |    |    |      |      |      |      |      |      |      |      |      |      |      |      |      |        |      |
|----------|----------------------------------------------------------------------------------------------------------------------------------------------|-------|----|----|----|----|------|------|------|------|------|------|------|------|------|------|------|------|------|--------|------|
| Q6PDJ6   | F-box only protein 42<br>OS=Mus musculus<br>GN=Fbxo42 PE=1<br>SV=1 -<br>[FBX42_MOUSE]                                                        | 1.67  | 1  | 1  | 1  | 2  | 1.06 | 1.09 | 1.02 | 1.05 | 0.99 | 1.04 | 0.98 | 1.01 | 0.95 | 1.01 | 0.95 | 1.21 | 1.14 | 77.73  | 7.58 |
| G3UYG6   | PERQ amino acid-rich<br>with GYF domain-<br>containing protein 2<br>(Fragment) OS=Mus<br>musculus GN=Gigyf2<br>PE=2 SV=1 -<br>[G3UYG6_MOUSE] | 16.26 | 12 | 14 | 14 | 29 | 0.97 | 1.00 | 1.04 | 0.92 | 0.93 | 0.88 | 0.90 | 1.01 | 0.97 | 0.90 | 0.91 | 0.89 | 0.92 | 148.49 | 5.57 |
| Q6PDY2   | 2-aminoethanethiol<br>dioxxygenase OS=Mus<br>musculus GN=Ado<br>PE=1 SV=2 -<br>[AEDO_MOUSE]                                                  | 28.91 | 1  | 5  | 5  | 16 | 0.98 | 1.12 | 1.25 | 0.96 | 1.06 | 0.99 | 1.10 | 1.01 | 1.13 | 1.00 | 1.07 | 1.00 | 1.12 | 28.35  | 5.97 |
| Q9D0A3   | UPF0552 protein<br>C15orf38 homolog<br>OS=Mus musculus<br>PE=2 SV=1 -<br>[CO038_MOUSE]                                                       | 49.56 | 1  | 10 | 10 | 86 | 1.03 | 0.96 | 0.90 | 0.93 | 0.87 | 1.07 | 1.01 | 1.01 | 1.01 | 0.95 | 0.93 | 0.92 | 0.88 | 25.18  | 5.19 |
| Q9WTR2   | Mitogen-activated<br>protein kinase kinase<br>kinase 6 OS=Mus<br>musculus GN=Map3k6<br>PE=1 SV=4 -<br>[M3K6_MOUSE]                           | 1.08  | 1  | 1  | 1  | 1  | 1.21 | 1.86 | 1.54 | 1.37 | 1.13 | 1.02 | 0.84 | 1.01 | 0.84 | 1.11 | 0.92 | 1.10 | 0.92 | 142.96 | 6.68 |
| Q9D8Z2   | TP53-regulated<br>inhibitor of apoptosis 1<br>OS=Mus musculus<br>GN=Triap1 PE=2<br>SV=1 -<br>[TRIA1_MOUSE]                                   | 55.26 | 1  | 4  | 4  | 16 | 0.99 | 0.68 | 0.65 | 0.95 | 0.97 | 1.07 | 1.09 | 1.01 | 1.07 | 0.99 | 0.97 | 0.93 | 1.00 | 8.75   | 5.48 |
| Q9EQG9   | Isoform 2 of Collagen<br>type IV alpha-3-<br>binding protein<br>OS=Mus musculus<br>GN=Col4a3bp -<br>[C43BP_MOUSE]                            | 11.87 | 3  | 6  | 6  | 11 | 1.00 | 0.98 | 0.98 | 0.99 | 0.99 | 1.10 | 0.97 | 1.01 | 0.93 | 0.99 | 0.92 | 1.04 | 1.04 | 68.24  | 5.43 |
| Q3UW66   | Sulfurtransferase<br>OS=Mus musculus<br>GN=Mpst PE=2 SV=1<br>[Q3UW66_MOUSE]                                                                  | 27.27 | 2  | 6  | 6  | 16 | 0.93 | 1.14 | 1.09 | 1.00 | 1.01 | 1.00 | 1.04 | 1.01 | 1.05 | 0.99 | 1.05 | 0.98 | 0.98 | 33.08  | 6.47 |
| P32883-2 | Isoform 2B of GTPase<br>KRas OS=Mus<br>musculus GN=Kras -<br>[RASK_MOUSE]                                                                    | 62.23 | 5  | 4  | 9  | 39 | 1.08 | 0.95 | 0.84 | 1.12 | 0.99 | 1.07 | 0.95 | 1.01 | 0.93 | 1.03 | 0.93 | 1.01 | 0.78 | 21.47  | 8.12 |
| Q9CXE2   | B-cell CLL/lymphoma<br>7 protein family<br>member A OS=Mus<br>musculus GN=Bcl7a<br>PE=2 SV=1 -<br>[BCL7A_MOUSE]                              | 26.67 | 3  | 2  | 4  | 15 | 1.02 | 1.38 | 1.54 | 0.95 | 1.09 | 1.09 | 1.10 | 1.01 | 1.20 | 1.00 | 1.00 | 1.07 | 1.27 | 22.77  | 5.06 |
| Q62018-3 | Isoform 3 of RNA<br>polymerase-associated<br>protein CTR9 homolog<br>OS=Mus musculus<br>GN=Ctr9 -<br>[CTR9_MOUSE]                            | 3.03  | 2  | 2  | 2  | 2  | 0.98 | 0.91 | 0.93 | 1.42 | 1.13 | 1.07 | 1.09 | 1.01 | 1.03 | 1.07 | 1.10 | 1.07 | 1.09 | 123.79 | 6.46 |

|          |                                                                                                        |       |    |    |    |     |      |      |      |      |      |      |      |      |      |      |      |      |      |        |      |
|----------|--------------------------------------------------------------------------------------------------------|-------|----|----|----|-----|------|------|------|------|------|------|------|------|------|------|------|------|------|--------|------|
| Q7TSH2   | Phosphorylase b kinase regulatory subunit beta OS=Mus musculus GN=Phkb PE=1 SV=1 [KPBB_MOUSE]          | 2.86  | 1  | 2  | 2  | 3   | 0.98 | 1.28 | 1.31 | 1.09 | 1.12 | 1.09 | 1.11 | 1.01 | 1.04 | 1.13 | 1.16 | 0.87 | 0.90 | 123.81 | 6.83 |
| Q9WUN2   | Serine/threonine-protein kinase TBK1 OS=Mus musculus GN=Tbk1 PE=1 SV=1 [TBK1_MOUSE]                    | 3.16  | 1  | 2  | 2  | 4   | 1.17 | 1.39 | 1.19 | 1.13 | 0.97 | 1.09 | 0.93 | 1.01 | 0.87 | 1.08 | 0.93 | 1.12 | 0.96 | 83.37  | 6.87 |
| Q9EQI8   | 39S ribosomal protein L46, mitochondrial OS=Mus musculus GN=Mrpl46 PE=2 SV=1 - [RM46_MOUSE]            | 9.89  | 1  | 2  | 2  | 4   | 0.86 | 0.96 | 1.11 | 0.83 | 0.96 | 0.84 | 0.97 | 1.01 | 1.17 | 0.89 | 1.03 | 1.14 | 1.32 | 32.11  | 7.40 |
| Q8K4I3   | Rho guanine nucleotide exchange factor 6 OS=Mus musculus GN=Arhgef6 PE=1 SV=1 - [ARHG6_MOUSE]          | 4.15  | 4  | 1  | 3  | 5   | 1.07 | 0.91 | 0.85 | 1.16 | 1.08 | 0.88 | 0.81 | 1.01 | 0.94 | 0.98 | 0.91 | 1.09 | 1.01 | 87.00  | 5.87 |
| Q6P9R2   | Serine/threonine-protein kinase OSR1 OS=Mus musculus GN=Oxsr1 PE=1 SV=1 - [OXSR1_MOUSE]                | 14.80 | 4  | 3  | 6  | 11  | 0.94 | 0.98 | 1.08 | 1.09 | 1.00 | 0.95 | 0.95 | 1.01 | 0.92 | 1.07 | 1.03 | 1.01 | 1.04 | 58.18  | 6.43 |
| Q8K4P8-4 | Isoform 4 of E3 ubiquitin-protein ligase HECW1 OS=Mus musculus GN=Hecw1 - [HECW1_MOUSE]                | 4.13  | 4  | 1  | 1  | 5   | 1.09 | 1.31 | 1.25 | 1.31 | 1.20 | 0.94 | 0.86 | 1.01 | 0.93 | 0.88 | 0.81 | 1.06 | 0.97 | 35.45  | 9.26 |
| Q6DFY2   | Opioid binding protein/cell adhesion molecule-like OS=Mus musculus GN=Opeml PE=2 SV=1 - [Q6DFY2_MOUSE] | 55.19 | 1  | 2  | 19 | 316 | 0.98 | 0.90 | 0.88 | 1.00 | 0.98 | 1.05 | 1.04 | 1.01 | 1.05 | 0.92 | 0.94 | 0.92 | 0.89 | 37.13  | 6.68 |
| P55066   | Neurocan core protein OS=Mus musculus GN=Ncan PE=2 SV=1 [NCAN_MOUSE]                                   | 28.31 | 1  | 29 | 30 | 190 | 1.01 | 0.98 | 0.99 | 0.94 | 0.95 | 0.98 | 1.00 | 1.01 | 0.98 | 0.97 | 0.96 | 0.92 | 0.93 | 137.11 | 5.72 |
| Q60673   | Receptor-type tyrosine-protein phosphatase-like N OS=Mus musculus GN=Ptpn PE=2 SV=2 - [PTPRN_MOUSE]    | 13.38 | 2  | 8  | 8  | 19  | 1.25 | 1.23 | 0.98 | 0.99 | 0.90 | 1.27 | 0.79 | 1.01 | 0.72 | 1.26 | 0.99 | 1.47 | 1.01 | 106.02 | 7.09 |
| Q14CH7   | Alanine-tRNA ligase, mitochondrial OS=Mus musculus GN=Aars2 PE=2 SV=1 - [SYAM_MOUSE]                   | 2.24  | 1  | 2  | 2  | 3   | 0.98 | 1.47 | 1.49 | 1.10 | 1.12 | 1.03 | 1.04 | 1.02 | 1.03 | 1.00 | 1.02 | 1.08 | 1.10 | 106.72 | 6.18 |
| Q3TQZ7   | Mitogen-activated protein kinase 10 OS=Mus musculus GN=Mapk10 PE=2 SV=1 - [Q3TQZ7_MOUSE]               | 35.17 | 19 | 4  | 12 | 24  | 1.25 | 0.99 | 0.94 | 1.33 | 0.87 | 1.14 | 0.93 | 1.02 | 0.93 | 0.95 | 0.91 | 0.97 | 1.00 | 47.97  | 7.69 |



|          |                                                                                                   |       |   |    |    |    |      |      |      |      |      |      |      |      |      |      |      |      |      |        |       |
|----------|---------------------------------------------------------------------------------------------------|-------|---|----|----|----|------|------|------|------|------|------|------|------|------|------|------|------|------|--------|-------|
| A2RT62   | F-box/LRR-repeat protein 16 OS=Mus musculus GN=Fbxl16 PE=2 SV=1 - [FXL16_MOUSE]                   | 15.03 | 1 | 5  | 5  | 24 | 0.98 | 1.05 | 1.12 | 0.96 | 1.05 | 1.00 | 1.06 | 1.02 | 1.09 | 0.92 | 1.08 | 0.99 | 1.06 | 51.84  | 6.60  |
| Q9CZJ6   | Protein Mis18-alpha OS=Mus musculus GN=Mis18a PE=2 SV=1 - [MS18A_MOUSE]                           | 7.35  | 1 | 1  | 1  | 1  | 0.91 | 1.34 | 1.47 | 0.95 | 1.04 | 1.02 | 1.11 | 1.02 | 1.11 | 0.96 | 1.06 | 1.02 | 1.12 | 22.93  | 5.27  |
| A2RSQ0   | DENN domain-containing protein 5B OS=Mus musculus GN=Dennd5b PE=1 SV=2 - [DEN5B_MOUSE]            | 1.18  | 1 | 1  | 1  | 2  | 0.97 | 1.08 | 1.12 | 1.20 | 1.24 | 0.88 | 0.91 | 1.02 | 1.05 | 1.16 | 1.20 | 1.39 | 1.44 | 144.54 | 6.68  |
| Q99N96   | 39S ribosomal protein L1, mitochondrial OS=Mus musculus GN=Mrp11 PE=1 SV=2 - [RM01_MOUSE]         | 11.31 | 2 | 3  | 3  | 5  | 1.01 | 0.94 | 0.97 | 0.99 | 1.01 | 1.06 | 1.08 | 1.02 | 1.02 | 0.98 | 1.00 | 1.06 | 1.09 | 37.57  | 8.72  |
| Q8BQU6   | Gap junction gamma-2 protein OS=Mus musculus GN=Gjc2 PE=1 SV=2 - [CXG2_MOUSE]                     | 7.73  | 1 | 1  | 1  | 9  | 0.76 | 0.99 | 1.30 | 1.06 | 1.38 | 0.89 | 1.17 | 1.02 | 1.34 | 1.14 | 1.50 | 0.85 | 1.11 | 46.98  | 7.12  |
| Q3U0D9-  | Isoform 2 of E3 ubiquitin-protein ligase HACE1 OS=Mus musculus GN=Hace1 - [HACE1_MOUSE]           | 6.21  | 6 | 4  | 4  | 8  | 0.98 | 1.21 | 1.17 | 1.09 | 1.08 | 1.08 | 0.86 | 1.02 | 0.81 | 0.93 | 0.84 | 1.16 | 1.06 | 94.51  | 5.60  |
| P47791-2 | Isoform Cytoplasmic of Glutathione reductase, mitochondrial OS=Mus musculus GN=Gsr - [GSHR_MOUSE] | 51.27 | 2 | 14 | 14 | 65 | 1.01 | 0.89 | 0.92 | 0.98 | 0.91 | 0.95 | 0.86 | 1.02 | 0.96 | 0.96 | 0.93 | 1.01 | 1.05 | 51.04  | 7.39  |
| Q8BTV1   | Tumor suppressor candidate 3 OS=Mus musculus GN=Tusc3 PE=2 SV=1 - [TUSC3_MOUSE]                   | 6.34  | 1 | 2  | 2  | 3  | 1.11 | 1.37 | 1.23 | 1.15 | 1.03 | 0.99 | 0.89 | 1.02 | 0.91 | 1.07 | 0.97 | 1.21 | 1.09 | 39.52  | 10.11 |
| Q8K341-4 | Isoform 4 of Alpha-tubulin N-acetyltransferase OS=Mus musculus GN=Atat1 - [ATAT_MOUSE]            | 26.73 | 9 | 7  | 7  | 14 | 0.92 | 1.01 | 1.09 | 0.98 | 1.08 | 0.97 | 1.03 | 1.02 | 0.99 | 1.04 | 1.11 | 1.01 | 1.03 | 37.50  | 10.10 |
| P23927   | Alpha-crystallin B chain OS=Mus musculus GN=Cryab PE=1 SV=2 - [CRYAB_MOUSE]                       | 50.86 | 1 | 7  | 7  | 23 | 0.94 | 0.80 | 0.79 | 0.96 | 1.01 | 1.08 | 1.10 | 1.02 | 1.10 | 1.04 | 1.05 | 0.95 | 1.01 | 20.06  | 7.33  |
| Q8R464   | Cell adhesion molecule 4 OS=Mus musculus GN=Cadm4 PE=1 SV=1 - [CADM4_MOUSE]                       | 35.57 | 1 | 12 | 12 | 97 | 0.98 | 0.95 | 1.02 | 0.91 | 0.95 | 0.99 | 1.03 | 1.02 | 1.03 | 0.97 | 1.01 | 0.95 | 1.00 | 42.70  | 6.30  |
| E0CYE2   | Inosine-5'-monophosphate dehydrogenase OS=Mus musculus GN=Impdh1 PE=2 SV=1 - [E0CYE2_MOUSE]       | 10.02 | 5 | 2  | 4  | 5  | 0.99 | 1.05 | 1.07 | 1.07 | 1.08 | 0.93 | 0.94 | 1.02 | 1.03 | 1.00 | 1.02 | 1.18 | 1.20 | 52.44  | 6.55  |

|          |                                                                                                     |       |   |    |    |    |      |      |      |      |      |      |      |      |      |      |      |      |      |        |       |
|----------|-----------------------------------------------------------------------------------------------------|-------|---|----|----|----|------|------|------|------|------|------|------|------|------|------|------|------|------|--------|-------|
| Q7TSS2-2 | Isoform 2 of Ubiquitin-conjugating enzyme E2 Q1 OS=Mus musculus GN=Ube2q1 - [UB2Q1_MOUSE]           | 9.09  | 5 | 2  | 2  | 3  | 1.00 | 0.96 | 0.96 | 1.10 | 1.10 | 1.01 | 1.01 | 1.02 | 1.02 | 0.98 | 0.99 | 1.01 | 1.01 | 28.47  | 4.74  |
| O08692   | Myeloid bacterinecin (F1) OS=Mus musculus GN=Ngp PE=2 SV=1 - [O08692_MOUSE]                         | 19.16 | 1 | 2  | 2  | 5  | 0.80 | 0.81 | 0.92 | 0.99 | 1.08 | 1.10 | 1.26 | 1.02 | 1.13 | 1.15 | 1.43 | 1.46 | 1.62 | 19.32  | 5.31  |
| D3Z6C3   | 40S ribosomal protein S3a OS=Mus musculus GN=Rps3a2 PE=3 SV=1 - [D3Z6C3_MOUSE]                      | 45.83 | 3 | 13 | 13 | 39 | 0.96 | 0.96 | 0.95 | 0.95 | 0.99 | 1.01 | 1.04 | 1.02 | 1.03 | 0.95 | 0.99 | 0.95 | 0.97 | 29.81  | 9.73  |
| Q3TB04   | FERM domain-containing protein 4A OS=Mus musculus GN=Frmd4a PE=2 SV=1 - [Q3TB04_MOUSE]              | 8.96  | 6 | 4  | 4  | 7  | 1.00 | 1.28 | 1.29 | 1.09 | 1.04 | 1.02 | 1.03 | 1.02 | 1.02 | 1.11 | 1.12 | 1.12 | 1.14 | 80.74  | 9.20  |
| P62267   | 40S ribosomal protein S23 OS=Mus musculus GN=Rps23 PE=2 SV=3 - [RS23_MOUSE]                         | 8.39  | 1 | 1  | 1  | 4  | 0.98 | 0.89 | 0.90 | 1.08 | 1.10 | 1.01 | 1.03 | 1.02 | 1.03 | 0.97 | 0.99 | 0.98 | 0.99 | 15.80  | 10.49 |
| Q09200   | Beta-1,4 N-acetylgalactosaminyltransferase 1 OS=Mus musculus GN=B4galnt1 PE=2 SV=1 - [B4GN1_MOUSE]  | 3.75  | 1 | 2  | 2  | 3  | 0.87 | 1.33 | 1.53 | 1.07 | 1.23 | 0.95 | 1.09 | 1.02 | 1.17 | 0.99 | 1.14 | 1.11 | 1.28 | 59.18  | 8.59  |
| P26231   | Catenin alpha-1 OS=Mus musculus GN=Ctnna1 PE=1 SV=1 - [CTNA1_MOUSE]                                 | 22.74 | 1 | 7  | 16 | 45 | 0.93 | 0.91 | 0.91 | 0.88 | 1.09 | 0.96 | 1.02 | 1.02 | 1.13 | 1.02 | 1.13 | 0.91 | 0.96 | 100.04 | 6.23  |
| Q80TE7   | Leucine-rich repeat-containing protein 7 OS=Mus musculus GN=Lrrc7 PE=1 SV=2 - [LRRRC7_MOUSE]        | 28.19 | 2 | 30 | 31 | 73 | 1.01 | 1.04 | 1.02 | 1.02 | 1.00 | 1.06 | 1.02 | 1.02 | 0.98 | 0.97 | 0.94 | 0.97 | 0.99 | 166.80 | 6.61  |
| Q9JKB1   | Ubiquitin carboxyl-terminal hydrolase isozyme L3 OS=Mus musculus GN=Uchl3 PE=1 SV=2 - [UCHL3_MOUSE] | 56.09 | 2 | 10 | 10 | 51 | 1.01 | 0.77 | 0.82 | 0.92 | 0.94 | 0.94 | 0.95 | 1.02 | 1.00 | 0.92 | 0.91 | 0.93 | 0.97 | 26.14  | 5.05  |
| F6RPJ9   | Insulin-degrading enzyme (Fragment) OS=Mus musculus GN=Ide PE=3 SV=1 - [F6RPJ9_MOUSE]               | 12.16 | 2 | 11 | 11 | 17 | 0.95 | 1.05 | 1.16 | 1.10 | 1.19 | 0.89 | 0.91 | 1.02 | 1.03 | 0.83 | 0.89 | 0.94 | 1.01 | 114.19 | 6.27  |
| Q9ERV1   | Probable E3 ubiquitin-protein ligase makorin-2 OS=Mus musculus GN=Mkrn2 PE=2 SV=2 - [MKRN2_MOUSE]   | 12.02 | 1 | 5  | 5  | 7  | 0.97 | 1.03 | 1.06 | 0.74 | 0.91 | 0.96 | 1.09 | 1.02 | 1.02 | 0.94 | 1.02 | 0.95 | 0.97 | 46.57  | 7.34  |

|          |                                                                                                                  |       |    |    |    |    |      |      |      |      |      |      |      |      |      |      |      |      |      |        |       |
|----------|------------------------------------------------------------------------------------------------------------------|-------|----|----|----|----|------|------|------|------|------|------|------|------|------|------|------|------|------|--------|-------|
| Q9D727   | Uncharacterized protein C6orf226 homolog OS=Mus musculus PE=4 SV=1 - [CF226_MOUSE]                               | 37.72 | 1  | 2  | 2  | 4  | 1.09 | 1.03 | 0.94 | 0.89 | 0.82 | 1.24 | 1.13 | 1.02 | 0.93 | 1.14 | 1.05 | 1.14 | 1.05 | 12.01  | 6.29  |
| E9QN14   | SLIT-ROBO Rho GTPase-activating protein 3 OS=Mus musculus GN=Srgap3 PE=2 SV=1 - [E9QN14_MOUSE]                   | 27.07 | 4  | 18 | 22 | 44 | 1.02 | 0.90 | 0.89 | 1.09 | 1.07 | 0.96 | 0.94 | 1.02 | 0.98 | 1.05 | 1.06 | 1.01 | 1.06 | 121.65 | 6.57  |
| Q99L17   | Cleavage stimulation factor subunit 3 OS=Mus musculus GN=Cstf3 PE=1 SV=1 - [CSTF3_MOUSE]                         | 1.81  | 1  | 1  | 1  | 2  | 1.07 | 1.18 | 1.10 | 1.00 | 0.93 | 0.97 | 0.90 | 1.02 | 0.95 | 0.94 | 0.88 | 1.11 | 1.04 | 82.82  | 8.12  |
| H3BK80   | PH and SEC7 domain-containing protein 2 OS=Mus musculus GN=Psd2 PE=2 SV=1 - [H3BK80_MOUSE]                       | 3.61  | 4  | 2  | 2  | 4  | 1.06 | 0.86 | 0.81 | 0.90 | 0.84 | 0.90 | 0.84 | 1.02 | 0.95 | 0.99 | 0.94 | 0.83 | 0.78 | 59.88  | 4.74  |
| E9PWM3   | Protein Armcx4 OS=Mus musculus GN=Armcx4 PE=2 SV=1 - [E9PWM3_MOUSE]                                              | 3.35  | 1  | 5  | 5  | 7  | 1.14 | 1.12 | 1.06 | 0.96 | 0.84 | 1.01 | 0.89 | 1.02 | 0.92 | 0.96 | 0.81 | 0.97 | 0.76 | 242.81 | 4.87  |
| P58468   | Protein FAM207A OS=Mus musculus GN=Fam207a PE=1 SV=1 - [F207A_MOUSE]                                             | 7.31  | 1  | 1  | 1  | 2  | 1.21 | 1.38 | 1.14 | 0.95 | 0.78 | 0.96 | 0.79 | 1.02 | 0.84 | 0.94 | 0.78 | 0.90 | 0.75 | 24.80  | 11.00 |
| O88428   | Bifunctional 3'-phosphoadenosine 5'-phosphosulfate synthase 2 OS=Mus musculus GN=Paps2 PE=1 SV=2 - [PAPS2_MOUSE] | 2.25  | 1  | 1  | 1  | 1  | 1.02 | 1.15 | 1.13 | 1.01 | 0.99 | 1.05 | 1.02 | 1.02 | 0.99 | 1.11 | 1.09 | 1.21 | 1.18 | 70.31  | 7.58  |
| Q8BHC1   | Ras-related protein Rab 39B OS=Mus musculus GN=Rab39b PE=2 SV=1 - [RB39B_MOUSE]                                  | 34.74 | 11 | 5  | 7  | 56 | 1.06 | 1.10 | 0.89 | 1.21 | 1.03 | 0.84 | 0.77 | 1.02 | 0.79 | 0.92 | 0.77 | 0.99 | 0.82 | 24.62  | 7.83  |
| Q9DCR2   | AP-3 complex subunit sigma-1 OS=Mus musculus GN=Ap3s1 PE=1 SV=2 - [AP3S1_MOUSE]                                  | 13.99 | 1  | 2  | 2  | 11 | 0.96 | 1.00 | 1.03 | 1.08 | 1.08 | 0.98 | 1.00 | 1.02 | 1.10 | 1.03 | 1.07 | 1.08 | 1.15 | 21.72  | 5.39  |
| Q8BK63-2 | Isoform 2 of Casein kinase I isoform alpha OS=Mus musculus GN=Csnk1a1 - [KC1A_MOUSE]                             | 7.08  | 8  | 2  | 2  | 3  | 1.17 | 1.33 | 1.13 | 1.19 | 1.05 | 0.92 | 0.78 | 1.02 | 0.86 | 1.08 | 0.92 | 1.23 | 1.05 | 37.54  | 9.48  |
| Q9JMK2   | Casein kinase I isoform epsilon OS=Mus musculus GN=Csnk1e PE=1 SV=2 - [KC1E_MOUSE]                               | 15.14 | 3  | 4  | 5  | 11 | 0.87 | 0.93 | 1.02 | 0.84 | 0.97 | 0.93 | 1.11 | 1.02 | 1.23 | 0.96 | 1.09 | 0.92 | 1.05 | 47.29  | 9.66  |
| Q54218   | Integrin beta OS=Mus musculus GN=Itgb2 PE=2 SV=1 - [Q54218_MOUSE]                                                | 8.05  | 6  | 4  | 5  | 9  | 1.02 | 1.25 | 1.24 | 1.01 | 1.06 | 0.97 | 0.94 | 1.02 | 0.99 | 1.12 | 1.10 | 1.13 | 1.11 | 84.84  | 7.05  |

|          |                                                                                                                 |       |   |    |     |      |      |      |      |      |      |      |      |      |      |      |      |      |      |        |      |
|----------|-----------------------------------------------------------------------------------------------------------------|-------|---|----|-----|------|------|------|------|------|------|------|------|------|------|------|------|------|------|--------|------|
| Q78PG9   | Coiled-coil domain-containing protein 25<br>OS=Mus musculus<br>GN=Ccdc25 PE=1<br>SV=1 -<br>[CCD25_MOUSE]        | 17.31 | 1 | 4  | 4   | 6    | 1.05 | 0.77 | 0.75 | 0.90 | 0.91 | 0.97 | 0.93 | 1.02 | 1.01 | 0.97 | 0.92 | 1.00 | 0.93 | 24.46  | 6.95 |
| D3Z7D2   | tRNA (guanine-N(7)-)methyltransferase<br>OS=Mus musculus<br>GN=Mettl1 PE=2<br>SV=1 -<br>[D3Z7D2_MOUSE]          | 6.14  | 2 | 1  | 1   | 2    | 0.90 | 0.97 | 1.07 | 1.14 | 1.26 | 0.97 | 1.07 | 1.02 | 1.12 | 1.14 | 1.26 | 1.09 | 1.21 | 25.82  | 9.04 |
| Q61656   | Probable ATP-dependent RNA helicase DDX5<br>OS=Mus musculus<br>GN=Ddx5 PE=1 SV=2<br>- [DDX5_MOUSE]              | 40.72 | 5 | 18 | 24  | 68   | 0.96 | 0.91 | 0.97 | 0.99 | 1.06 | 1.06 | 1.16 | 1.02 | 1.11 | 1.00 | 1.03 | 1.03 | 1.07 | 69.25  | 8.92 |
| D3Z0T8   | Dnaj homolog subfamily C member 28 (Fragment)<br>OS=Mus musculus<br>GN=Dnajc28 PE=2<br>SV=1 -<br>[D3Z0T8_MOUSE] | 16.67 | 4 | 1  | 1   | 2    | 1.01 | 0.98 | 0.96 | 0.90 | 0.89 | 0.90 | 0.88 | 1.02 | 1.00 | 1.01 | 1.00 | 0.95 | 0.94 | 9.64   | 8.53 |
| Q91W39   | Nuclear receptor coactivator 5<br>OS=Mus musculus<br>GN=Ncoa5 PE=1 SV=1<br>- [NCOA5_MOUSE]                      | 20.90 | 2 | 4  | 8   | 19   | 0.86 | 0.99 | 1.16 | 0.95 | 1.12 | 1.05 | 1.21 | 1.02 | 1.18 | 1.03 | 1.20 | 0.94 | 1.13 | 65.28  | 9.82 |
| Q8CH72   | E3 ubiquitin-protein ligase TRIM52<br>OS=Mus musculus<br>GN=Trim52 PE=1<br>SV=2 -<br>[TRIM52_MOUSE]             | 25.95 | 3 | 13 | 13  | 25   | 0.94 | 0.90 | 0.93 | 0.98 | 0.96 | 1.02 | 1.06 | 1.02 | 1.04 | 0.97 | 1.03 | 0.99 | 1.02 | 72.01  | 6.90 |
| Q8K2H2   | OTU domain-containing protein 6B<br>OS=Mus musculus<br>GN=Otud6b PE=2<br>SV=1 -<br>[OTU6B_MOUSE]                | 27.55 | 3 | 5  | 5   | 8    | 1.16 | 1.18 | 1.13 | 0.86 | 0.88 | 1.17 | 0.99 | 1.02 | 0.95 | 1.12 | 0.96 | 1.15 | 1.01 | 33.74  | 5.53 |
| P70699   | Lysosomal alpha-glucosidase<br>OS=Mus musculus<br>GN=Gaa PE=1 SV=2<br>- [LYAG_MOUSE]                            | 15.32 | 5 | 12 | 12  | 25   | 1.07 | 1.02 | 0.98 | 0.94 | 0.91 | 1.00 | 1.03 | 1.02 | 0.90 | 1.17 | 1.04 | 1.07 | 1.13 | 106.18 | 5.83 |
| Q99LF4   | tRNA-splicing ligase RtcB homolog<br>OS=Mus musculus<br>GN=D10Wsu52e PE=2 SV=1<br>- [RTCB_MOUSE]                | 47.33 | 1 | 18 | 18  | 36   | 0.90 | 0.94 | 1.01 | 1.01 | 1.07 | 1.00 | 1.10 | 1.02 | 1.14 | 0.99 | 1.06 | 0.99 | 1.05 | 55.21  | 7.23 |
| P16546   | Spectrin alpha chain, non-erythrocytic 1<br>OS=Mus musculus<br>GN=Sptan1 PE=1<br>SV=4 -<br>[SPTN1_MOUSE]        | 81.03 | 3 | 6  | 218 | 5377 | 0.94 | 0.81 | 0.84 | 0.83 | 0.92 | 0.95 | 1.03 | 1.02 | 1.08 | 0.90 | 0.96 | 0.90 | 0.93 | 284.42 | 5.33 |
| Q8BG79-2 | Isoform 2 of CWF19-like protein 2<br>OS=Mus musculus<br>GN=Cwf19l2 -<br>[C19L2_MOUSE]                           | 2.48  | 2 | 1  | 1   | 1    | 1.10 | 0.85 | 0.77 | 1.28 | 1.17 | 1.13 | 1.03 | 1.02 | 0.93 | 0.90 | 0.83 | 0.78 | 0.72 | 56.24  | 8.75 |

|        |                                                                                                              |       |   |    |    |     |      |      |      |      |      |      |      |      |      |      |      |      |      |       |      |
|--------|--------------------------------------------------------------------------------------------------------------|-------|---|----|----|-----|------|------|------|------|------|------|------|------|------|------|------|------|------|-------|------|
| Q8BH5  | F-box-like/WD repeat-containing protein TBL1XR1 OS=Mus musculus GN=Tbl1xr1 PE=2 SV=1 - [TBL1R_MOUSE]         | 8.56  | 2 | 4  | 4  | 17  | 0.96 | 0.87 | 0.91 | 0.94 | 0.94 | 1.04 | 1.14 | 1.02 | 1.03 | 1.01 | 1.06 | 0.98 | 0.98 | 55.63 | 5.63 |
| Q9D2C2 | Isoform 2 of Protein SAAL1 OS=Mus musculus GN=Saal1 - [SAAL1_MOUSE]                                          | 3.23  | 2 | 1  | 1  | 1   | 1.13 | 0.83 | 0.73 | 1.12 | 0.99 | 0.68 | 0.60 | 1.02 | 0.90 | 0.89 | 0.79 | 0.71 | 0.63 | 48.20 | 4.53 |
| Q8BYW1 | Isoform 2 of Rho GTPase-activating protein 25 OS=Mus musculus GN=Arhgap25 - [RHG25_MOUSE]                    | 9.84  | 8 | 4  | 5  | 6   | 0.86 | 0.87 | 1.02 | 0.96 | 1.15 | 1.02 | 1.14 | 1.02 | 1.11 | 0.97 | 1.20 | 0.86 | 1.02 | 62.83 | 5.48 |
| P11031 | Activated RNA polymerase II transcriptional coactivator p15 OS=Mus musculus GN=Sub1 PE=1 SV=3 - [TCP4_MOUSE] | 39.37 | 1 | 7  | 7  | 24  | 1.02 | 0.85 | 0.85 | 0.95 | 0.97 | 1.02 | 1.00 | 1.02 | 0.97 | 0.86 | 0.88 | 0.79 | 0.75 | 14.42 | 9.60 |
| Q6PDL0 | Cytoplasmic dynein 1 light intermediate chain 2 OS=Mus musculus GN=Dync1li2 PE=1 SV=2 - [DC1L2_MOUSE]        | 27.24 | 1 | 10 | 11 | 34  | 0.98 | 0.94 | 1.02 | 1.02 | 0.91 | 1.01 | 1.04 | 1.02 | 1.09 | 1.00 | 1.02 | 1.03 | 1.03 | 54.18 | 6.28 |
| G5E897 | KDEL (Lys-Asp-Glu-Leu) containing 2, isoform CRA_b OS=Mus musculus GN=Kdelc2 PE=4 SV=1 - [G5E897_MOUSE]      | 3.38  | 1 | 1  | 1  | 2   | 1.06 | 1.31 | 1.24 | 1.28 | 1.21 | 1.17 | 1.10 | 1.02 | 0.96 | 1.18 | 1.11 | 1.26 | 1.20 | 57.65 | 7.74 |
| Q8R0F8 | Acylpyruvase FAHD1, mitochondrial OS=Mus musculus GN=Fahd1 PE=1 SV=2 - [FAHD1_MOUSE]                         | 72.25 | 1 | 10 | 10 | 107 | 1.02 | 0.73 | 0.74 | 0.90 | 0.89 | 0.98 | 0.97 | 1.02 | 1.00 | 0.93 | 0.92 | 0.84 | 0.83 | 25.16 | 7.69 |
| B0QZP4 | tRNA-splicing endonuclease subunit Sen54 (Fragment) OS=Mus musculus GN=Tsen54 PE=2 SV=1 - [B0QZP4_MOUSE]     | 6.54  | 4 | 1  | 1  | 2   | 0.92 | 1.35 | 1.47 | 0.96 | 1.05 | 1.10 | 1.19 | 1.02 | 1.11 | 1.06 | 1.16 | 1.00 | 1.09 | 17.30 | 8.29 |
| Q9QYB1 | Chloride intracellular channel protein 4 OS=Mus musculus GN=Clc4 PE=1 SV=3 - [CLIC4_MOUSE]                   | 45.45 | 1 | 7  | 7  | 18  | 0.96 | 1.05 | 0.90 | 1.01 | 1.11 | 0.99 | 1.04 | 1.02 | 0.97 | 1.11 | 1.27 | 1.22 | 1.14 | 28.71 | 5.59 |
| Q5KU39 | Vacuolar protein sorting-associated protein 41 homolog OS=Mus musculus GN=Vps41 PE=2 SV=1 - [VPS41_MOUSE]    | 1.88  | 1 | 1  | 2  | 3   | 1.15 | 1.14 | 0.99 | 1.25 | 1.08 | 1.03 | 0.89 | 1.02 | 0.88 | 1.06 | 0.92 | 1.24 | 1.08 | 98.54 | 5.81 |

|        |                                                                                                                                     |       |   |   |    |    |      |      |      |      |      |      |      |      |      |      |      |      |      |        |       |
|--------|-------------------------------------------------------------------------------------------------------------------------------------|-------|---|---|----|----|------|------|------|------|------|------|------|------|------|------|------|------|------|--------|-------|
| Q8BFW9 | Solute carrier family 2, facilitated glucose transporter member 12<br>OS=Mus musculus<br>GN=Slc2a12 PE=2<br>SV=1 -<br>[GTR12_MOUSE] | 3.38  | 1 | 1 | 1  | 1  | 0.90 | 0.69 | 0.76 | 0.77 | 0.85 | 0.95 | 1.05 | 1.02 | 1.12 | 0.79 | 0.88 | 0.81 | 0.89 | 67.29  | 8.07  |
| E0CYQ2 | NudC domain-containing protein 2<br>OS=Mus musculus<br>GN=Nudcd2 PE=2<br>SV=1 -<br>[E0CYQ2_MOUSE]                                   | 15.91 | 2 | 2 | 2  | 6  | 0.89 | 0.94 | 1.08 | 0.90 | 1.04 | 0.97 | 1.08 | 1.02 | 1.17 | 0.94 | 1.08 | 0.96 | 1.10 | 14.72  | 4.68  |
| Q99KK9 | Probable histidine-tRNA ligase, mitochondrial<br>OS=Mus musculus<br>GN=Hars2<br>PE=2 SV=1 -<br>[SYHM_MOUSE]                         | 10.89 | 2 | 2 | 5  | 8  | 1.00 | 1.04 | 1.04 | 1.10 | 1.11 | 1.09 | 1.09 | 1.02 | 1.02 | 0.99 | 0.99 | 0.94 | 0.95 | 56.95  | 8.32  |
| Q5TRM4 | Isoform 4 of Neuropathy target esterase<br>OS=Mus musculus<br>GN=Pnpl6 -<br>[PLPL6_MOUSE]                                           | 1.03  | 4 | 1 | 1  | 2  | 1.15 | 1.21 | 1.05 | 1.16 | 1.01 | 0.84 | 0.73 | 1.02 | 0.89 | 0.91 | 0.79 | 0.91 | 0.80 | 129.27 | 8.84  |
| Q7M6Y3 | Isoform 6 of Phosphatidylinositol-binding clathrin assembly protein<br>OS=Mus musculus<br>GN=Picalm -<br>[PICAL_MOUSE]              | 24.39 | 3 | 1 | 10 | 21 | 0.99 | 0.42 | 0.43 | 1.07 | 1.08 | 0.92 | 0.93 | 1.02 | 1.03 | 0.97 | 0.98 | 0.86 | 0.87 | 70.52  | 7.90  |
| D3Z5Y5 | Choline/ethanolamine phosphotransferase 1 (Fragment)<br>OS=Mus musculus<br>GN=Cept1<br>PE=2 SV=1 -<br>[D3Z5Y5_MOUSE]                | 18.33 | 4 | 1 | 1  | 2  | 1.01 | 1.30 | 1.28 | 1.14 | 1.12 | 0.83 | 0.82 | 1.02 | 1.00 | 0.99 | 0.98 | 1.20 | 1.19 | 6.74   | 10.01 |
| Q3UZA1 | Isoform 2 of CapZ-interacting protein<br>OS=Mus musculus<br>GN=Resd1 -<br>[CPZIP_MOUSE]                                             | 21.47 | 2 | 6 | 6  | 14 | 0.99 | 1.18 | 1.20 | 0.91 | 0.92 | 1.21 | 1.17 | 1.02 | 1.02 | 1.00 | 0.98 | 0.91 | 0.90 | 40.83  | 5.05  |
| O70582 | Arachidonate 12-lipoxygenase, 12R-type<br>OS=Mus musculus<br>GN=Alox12b PE=2<br>SV=1 -<br>[LX12B_MOUSE]                             | 1.57  | 1 | 1 | 1  | 2  | 0.87 | 0.66 | 0.76 | 0.84 | 0.96 | 1.03 | 1.17 | 1.02 | 1.16 | 1.06 | 1.22 | 0.90 | 1.03 | 80.53  | 6.71  |
| Q9JLJ8 | Squamous cell carcinoma antigen recognized by T-cells 3<br>OS=Mus musculus<br>GN=Sart3 PE=2 SV=1 -<br>[SART3_MOUSE]                 | 5.72  | 2 | 5 | 5  | 10 | 0.93 | 0.98 | 0.99 | 1.08 | 1.07 | 0.98 | 1.03 | 1.02 | 1.07 | 0.84 | 0.93 | 0.98 | 1.04 | 109.55 | 5.24  |
| Q9WVH9 | Fibulin-5<br>OS=Mus musculus<br>GN=Fbln5<br>PE=2 SV=1 -<br>[FBLN5_MOUSE]                                                            | 12.72 | 1 | 4 | 4  | 6  | 0.87 | 1.55 | 1.54 | 1.09 | 1.20 | 0.91 | 0.99 | 1.02 | 1.14 | 1.16 | 1.38 | 1.06 | 1.23 | 50.16  | 4.70  |
| E9QME5 | E3 ubiquitin-protein ligase TRIM33<br>OS=Mus musculus<br>GN=Trim33 PE=2<br>SV=1 -<br>[E9QME5_MOUSE]                                 | 1.69  | 4 | 2 | 2  | 2  | 1.06 | 1.40 | 1.31 | 0.91 | 0.85 | 0.86 | 0.81 | 1.02 | 0.96 | 0.91 | 0.86 | 1.04 | 0.98 | 121.61 | 6.73  |

|        |                                                                                                                    |       |   |    |    |     |      |      |      |      |      |      |      |      |      |      |      |      |      |        |      |
|--------|--------------------------------------------------------------------------------------------------------------------|-------|---|----|----|-----|------|------|------|------|------|------|------|------|------|------|------|------|------|--------|------|
| Q7TPD3 | Roundabout homolog 2<br>OS=Mus musculus<br>GN=Robo2 PE=2<br>SV=2 -<br>[ROBO2_MOUSE]                                | 21.29 | 5 | 21 | 22 | 43  | 1.06 | 1.06 | 1.03 | 1.01 | 1.00 | 1.06 | 1.01 | 1.02 | 0.98 | 1.00 | 0.96 | 1.01 | 1.00 | 161.09 | 6.33 |
| Q91X78 | Erlin-1 OS=Mus musculus<br>GN=Erlin1 PE=1<br>SV=1 -<br>[ERLN1_MOUSE]                                               | 11.27 | 2 | 1  | 3  | 8   | 0.81 | 1.15 | 1.42 | 1.16 | 1.44 | 0.63 | 0.78 | 1.02 | 1.26 | 0.83 | 1.02 | 0.90 | 1.12 | 38.91  | 7.21 |
| Q60936 | Chaperone activity of bc1 complex-like, mitochondrial OS=Mus musculus<br>GN=Adeck3 PE=2<br>SV=2 -<br>[ADCK3_MOUSE] | 4.19  | 3 | 2  | 2  | 3   | 1.13 | 1.53 | 1.35 | 1.51 | 1.33 | 1.03 | 0.90 | 1.02 | 0.90 | 0.90 | 0.80 | 1.19 | 1.05 | 71.70  | 6.54 |
| Q9CZK7 | Transmembrane protein 55A OS=Mus musculus<br>GN=Tmem55a PE=1<br>SV=1 -<br>[TM55A_MOUSE]                            | 4.28  | 1 | 1  | 1  | 2   | 1.02 | 1.03 | 1.00 | 1.08 | 1.06 | 0.83 | 0.81 | 1.02 | 1.00 | 0.86 | 0.84 | 1.02 | 1.00 | 28.02  | 8.68 |
| P97352 | Protein S100-A13 OS=Mus musculus<br>GN=S100a13 PE=1<br>SV=1 -<br>[S10AD_MOUSE]                                     | 41.84 | 1 | 5  | 5  | 19  | 1.10 | 0.69 | 0.69 | 0.85 | 0.76 | 1.00 | 0.93 | 1.02 | 0.88 | 0.90 | 0.87 | 0.85 | 0.83 | 11.15  | 6.13 |
| Q8R2K3 | Single-stranded DNA-binding protein OS=Mus musculus<br>GN=Ssbp1 PE=2<br>SV=1 -<br>[Q8R2K3_MOUSE]                   | 56.76 | 3 | 8  | 8  | 31  | 1.04 | 0.85 | 0.77 | 0.89 | 0.84 | 0.98 | 0.96 | 1.02 | 0.98 | 0.97 | 0.98 | 0.94 | 0.99 | 17.15  | 9.79 |
| Q6ZWY8 | Thymosin beta-10 OS=Mus musculus<br>GN=Tmsb10 PE=2<br>SV=3 -<br>[TYB10_MOUSE]                                      | 45.45 | 3 | 1  | 3  | 178 | 1.04 | 0.49 | 0.47 | 0.95 | 0.91 | 1.26 | 1.20 | 1.02 | 0.98 | 0.97 | 0.93 | 0.88 | 0.85 | 5.02   | 5.36 |
| Q64337 | Sequestosome-1 OS=Mus musculus<br>GN=Sqstm1 PE=1<br>SV=1 -<br>[SQSTM_MOUSE]                                        | 40.27 | 4 | 8  | 8  | 24  | 1.10 | 1.06 | 0.90 | 0.98 | 0.99 | 1.05 | 1.02 | 1.02 | 0.93 | 0.92 | 0.88 | 1.08 | 0.93 | 48.13  | 5.21 |
| Q9QZF2 | Glypican-1 OS=Mus musculus<br>GN=Gpc1 PE=1<br>SV=1 -<br>[GPC1_MOUSE]                                               | 31.24 | 1 | 10 | 10 | 17  | 1.05 | 1.07 | 1.14 | 1.21 | 1.08 | 1.07 | 1.03 | 1.02 | 0.89 | 1.07 | 0.91 | 0.94 | 0.87 | 61.32  | 7.05 |
| Q61609 | Sodium-dependent phosphate transporter 1 OS=Mus musculus<br>GN=Slc20a1 PE=1<br>SV=1 -<br>[S20A1_MOUSE]             | 5.73  | 1 | 3  | 3  | 5   | 1.06 | 0.97 | 0.92 | 0.98 | 0.97 | 1.00 | 0.93 | 1.02 | 0.94 | 0.93 | 0.86 | 0.89 | 0.87 | 74.11  | 6.89 |
| A2AGX3 | PR domain-containing protein 11 OS=Mus musculus<br>GN=Prdm11 PE=3<br>SV=1 -<br>[PRD11_MOUSE]                       | 1.77  | 1 | 1  | 1  | 1   | 0.95 | 0.69 | 0.72 | 0.80 | 0.84 | 1.06 | 1.11 | 1.02 | 1.07 | 0.81 | 0.85 | 0.75 | 0.79 | 63.34  | 6.55 |
| P97326 | Cadherin-6 OS=Mus musculus<br>GN=Cdh6 PE=1<br>SV=2 -<br>[CADH6_MOUSE]                                              | 6.08  | 1 | 1  | 3  | 7   | 0.99 | 1.00 | 1.00 | 0.98 | 0.99 | 0.96 | 0.96 | 1.02 | 1.03 | 0.96 | 0.97 | 1.02 | 1.03 | 88.30  | 5.00 |
| Q8BGH7 | CDC42 small effector protein 2 OS=Mus musculus<br>GN=Cdc42se2 PE=1<br>SV=1 -<br>[C42S2_MOUSE]                      | 22.62 | 1 | 1  | 1  | 3   | 0.94 | 0.62 | 0.66 | 0.95 | 1.00 | 1.00 | 1.05 | 1.02 | 1.08 | 0.91 | 0.97 | 0.82 | 0.87 | 9.22   | 8.35 |

|        |                                                                                                                                       |       |   |    |    |      |      |      |      |      |      |      |      |      |      |      |      |      |      |       |       |
|--------|---------------------------------------------------------------------------------------------------------------------------------------|-------|---|----|----|------|------|------|------|------|------|------|------|------|------|------|------|------|------|-------|-------|
| Q9ERD7 | Tubulin beta-3 chain<br>OS=Mus musculus<br>GN=Tubb3 PE=1<br>SV=1 -<br>[TBB3_MOUSE]                                                    | 73.56 | 1 | 11 | 29 | 1253 | 0.98 | 1.04 | 1.07 | 1.06 | 1.08 | 1.02 | 1.03 | 1.02 | 1.04 | 1.03 | 1.05 | 1.06 | 1.07 | 50.39 | 4.93  |
| Q8C0Y0 | Isoform 2 of<br>Serine/threonine-<br>protein phosphatase 4<br>regulatory subunit 4<br>OS=Mus musculus<br>GN=Ppp4r4 -<br>[PP4R4_MOUSE] | 1.52  | 3 | 1  | 1  | 2    | 0.95 | 1.13 | 1.19 | 1.11 | 1.17 | 1.06 | 1.11 | 1.02 | 1.07 | 1.06 | 1.12 | 1.01 | 1.06 | 90.42 | 6.57  |
| Q9QE3  | Isoform 6 of B-cell<br>lymphoma/leukemia<br>11A OS=Mus<br>musculus GN=Bcl11a -<br>[BC11A_MOUSE]                                       | 32.98 | 3 | 1  | 4  | 10   | 0.86 | 1.15 | 1.34 | 0.87 | 1.02 | 0.97 | 1.13 | 1.02 | 1.19 | 1.04 | 1.22 | 1.15 | 1.34 | 21.06 | 7.15  |
| Q9CRD4 | Dysbindin domain-<br>containing protein 2<br>OS=Mus musculus<br>GN=Dbndd2 PE=1<br>SV=1 -<br>[DBND2_MOUSE]                             | 7.59  | 1 | 1  | 1  | 2    | 1.08 | 1.10 | 1.02 | 0.84 | 0.78 | 1.03 | 0.95 | 1.02 | 0.94 | 1.07 | 0.99 | 1.17 | 1.09 | 17.18 | 4.22  |
| F8VPK3 | Myc-associated zinc<br>finger protein OS=Mus<br>musculus GN=Maz<br>PE=4 SV=1 -<br>[F8VPK3_MOUSE]                                      | 1.89  | 3 | 1  | 1  | 1    | 0.89 | 0.93 | 1.04 | 0.94 | 1.06 | 1.08 | 1.20 | 1.02 | 1.14 | 1.02 | 1.15 | 0.99 | 1.12 | 48.71 | 8.95  |
| P61087 | Ubiquitin-conjugating<br>enzyme E2 K OS=Mus<br>musculus GN=Ube2k<br>PE=1 SV=3 -<br>[UBE2K_MOUSE]                                      | 40.50 | 5 | 7  | 7  | 14   | 0.97 | 0.99 | 1.02 | 0.97 | 1.02 | 1.04 | 1.08 | 1.02 | 1.15 | 0.98 | 1.20 | 1.00 | 1.15 | 22.39 | 5.44  |
| Q60770 | Syntaxin-binding<br>protein 3 OS=Mus<br>musculus GN=Stxbp3<br>PE=1 SV=1 -<br>[STXB3_MOUSE]                                            | 9.63  | 2 | 5  | 5  | 13   | 0.92 | 1.09 | 1.18 | 1.04 | 1.11 | 0.96 | 1.04 | 1.02 | 1.01 | 1.04 | 1.11 | 1.08 | 1.13 | 67.90 | 8.02  |
| F6SVV1 | Protein Gm9493<br>OS=Mus musculus<br>GN=Gm9493 PE=4<br>SV=1 -<br>[F6SVV1_MOUSE]                                                       | 36.46 | 3 | 6  | 6  | 10   | 0.98 | 0.90 | 0.87 | 1.08 | 1.11 | 1.05 | 1.12 | 1.02 | 0.96 | 1.04 | 1.08 | 0.97 | 0.98 | 21.87 | 10.02 |
| P21237 | Brain-derived<br>neurotrophic factor<br>OS=Mus musculus<br>GN=Bdnf PE=1 SV=1 -<br>[BDNF_MOUSE]                                        | 6.43  | 3 | 1  | 1  | 4    | 1.16 | 1.05 | 0.90 | 0.90 | 0.77 | 1.04 | 0.89 | 1.02 | 0.88 | 1.11 | 0.96 | 1.01 | 0.87 | 28.11 | 8.66  |
| Q62092 | Neuron-specific protein<br>family member 1<br>OS=Mus musculus<br>GN=Nsg1 PE=2 SV=3<br>- [NSG1_MOUSE]                                  | 4.32  | 1 | 1  | 1  | 1    | 1.06 | 1.07 | 1.01 | 0.93 | 0.88 | 1.06 | 1.00 | 1.02 | 0.96 | 1.08 | 1.02 | 1.14 | 1.08 | 20.92 | 6.21  |
| Q9D6R2 | Isocitrate<br>dehydrogenase [NAD]<br>subunit alpha,<br>mitochondrial OS=Mus<br>musculus GN=Idh3a<br>PE=1 SV=1 -<br>[IDH3A_MOUSE]      | 54.10 | 2 | 21 | 21 | 146  | 0.90 | 0.85 | 0.94 | 0.96 | 1.05 | 1.04 | 1.11 | 1.02 | 1.11 | 0.98 | 1.08 | 0.94 | 1.04 | 39.61 | 6.73  |



|        |                                                                                                                   |       |   |    |    |     |      |      |      |      |      |      |      |      |      |      |      |      |      |        |      |
|--------|-------------------------------------------------------------------------------------------------------------------|-------|---|----|----|-----|------|------|------|------|------|------|------|------|------|------|------|------|------|--------|------|
| Q6PD24 | Ankyrin repeat domain-containing protein 13D<br>OS=Mus musculus<br>GN=Ankr13d PE=2<br>SV=1 -<br>[AN13D_MOUSE]     | 7.34  | 3 | 2  | 3  | 7   | 0.95 | 1.06 | 1.01 | 0.89 | 0.83 | 1.11 | 1.12 | 1.02 | 1.04 | 1.13 | 1.14 | 0.96 | 0.98 | 58.37  | 5.26 |
| E0CZ72 | Kinesin-like protein<br>KIF2A OS=Mus<br>musculus GN=Kif2a<br>PE=2 SV=1 -<br>[E0CZ72_MOUSE]                        | 33.11 | 7 | 3  | 20 | 64  | 0.85 | 0.97 | 1.17 | 0.93 | 0.96 | 0.94 | 1.09 | 1.02 | 1.10 | 1.13 | 1.30 | 0.97 | 1.13 | 83.81  | 6.42 |
| Q9CPX6 | Ubiquitin-like-<br>conjugating enzyme<br>ATG3 OS=Mus<br>musculus GN=Atg3<br>PE=1 SV=1 -<br>[ATG3_MOUSE]           | 30.89 | 1 | 6  | 6  | 19  | 0.97 | 0.92 | 0.87 | 0.98 | 1.01 | 1.07 | 1.10 | 1.02 | 1.03 | 1.05 | 1.08 | 1.18 | 1.05 | 35.77  | 4.72 |
| P97825 | Hematological and<br>neurological expressed<br>1 protein OS=Mus<br>musculus GN=Hn1<br>PE=1 SV=3 -<br>[HN1_MOUSE]  | 37.66 | 1 | 4  | 4  | 42  | 1.11 | 1.03 | 0.90 | 0.91 | 0.79 | 1.07 | 0.94 | 1.02 | 0.97 | 0.98 | 0.89 | 1.01 | 0.90 | 16.07  | 5.31 |
| P26883 | Peptidyl-prolyl cis-<br>trans isomerase<br>FKBP1A OS=Mus<br>musculus GN=Fkbp1a<br>PE=1 SV=2 -<br>[FKB1A_MOUSE]    | 73.15 | 2 | 8  | 8  | 216 | 1.12 | 0.85 | 0.74 | 0.91 | 0.84 | 1.09 | 0.99 | 1.02 | 0.91 | 0.98 | 0.89 | 0.98 | 0.89 | 11.92  | 8.16 |
| E9QLH4 | E3 ubiquitin-protein<br>ligase TRIM9<br>OS=Mus musculus<br>GN=Trim9 PE=2<br>SV=1 -<br>[E9QLH4_MOUSE]              | 27.54 | 8 | 15 | 15 | 41  | 0.92 | 1.11 | 1.21 | 1.02 | 1.05 | 0.96 | 1.04 | 1.02 | 1.03 | 0.97 | 1.01 | 1.05 | 1.11 | 87.49  | 6.92 |
| P42128 | Forkhead box protein<br>K1 OS=Mus musculus<br>GN=Foxk1 PE=1<br>SV=2 -<br>[FOXK1_MOUSE]                            | 6.95  | 1 | 2  | 2  | 3   | 0.95 | 1.14 | 1.16 | 1.08 | 1.10 | 1.06 | 1.10 | 1.02 | 1.07 | 0.96 | 0.98 | 1.15 | 1.21 | 74.87  | 9.17 |
| F7D5G9 | Protein Ciz1<br>(Fragment) OS=Mus<br>musculus GN=Ciz1<br>PE=4 SV=1 -<br>[F7D5G9_MOUSE]                            | 3.27  | 5 | 1  | 1  | 1   | 0.90 | 0.97 | 1.09 | 0.79 | 0.88 | 1.08 | 1.20 | 1.02 | 1.14 | 1.19 | 1.33 | 1.09 | 1.22 | 27.19  | 4.79 |
| Q9CZW6 | E3 ubiquitin-protein<br>ligase RNF146<br>OS=Mus musculus<br>GN=Rnf146 PE=1<br>SV=2 -<br>[RN146_MOUSE]             | 11.42 | 2 | 3  | 3  | 6   | 0.94 | 0.86 | 1.04 | 0.85 | 0.94 | 1.02 | 1.07 | 1.02 | 1.11 | 1.01 | 1.09 | 0.99 | 1.03 | 38.91  | 5.20 |
| Q80U35 | Rho guanine nucleotide<br>exchange factor 17<br>OS=Mus musculus<br>GN=Arhgef17 PE=1<br>SV=2 -<br>[ARHGH_MOUSE]    | 1.56  | 2 | 3  | 3  | 4   | 1.05 | 0.91 | 0.85 | 1.16 | 1.15 | 0.99 | 0.92 | 1.02 | 0.95 | 1.08 | 1.01 | 1.04 | 1.00 | 221.53 | 6.30 |
| P38060 | Hydroxymethylglutaryl-<br>CoA lyase,<br>mitochondrial OS=Mus<br>musculus GN=Hmgcl<br>PE=1 SV=2 -<br>[HMGCL_MOUSE] | 22.15 | 1 | 5  | 5  | 6   | 1.07 | 1.22 | 1.14 | 1.08 | 1.07 | 1.19 | 0.99 | 1.02 | 1.10 | 1.28 | 1.01 | 1.36 | 1.26 | 34.22  | 8.41 |

|          |                                                                                                           |       |    |    |    |    |      |      |      |      |      |      |      |      |      |      |      |      |      |        |      |
|----------|-----------------------------------------------------------------------------------------------------------|-------|----|----|----|----|------|------|------|------|------|------|------|------|------|------|------|------|------|--------|------|
| P55302   | Alpha-2-macroglobulin receptor-associated protein OS=Mus musculus GN=Lrpap1 PE=1 SV=1 - [AMRP_MOUSE]      | 47.50 | 2  | 17 | 17 | 81 | 0.94 | 0.88 | 0.94 | 0.84 | 0.90 | 1.07 | 1.15 | 1.02 | 1.06 | 1.00 | 1.03 | 0.91 | 1.04 | 42.19  | 7.87 |
| Q6P1B3   | PILR alpha-associated neural protein OS=Mus musculus GN=Piamp PE=1 SV=1 - [PIANP_MOUSE]                   | 21.22 | 3  | 3  | 3  | 7  | 1.06 | 0.74 | 0.70 | 1.00 | 0.94 | 1.25 | 1.17 | 1.02 | 0.96 | 1.10 | 1.04 | 1.27 | 1.29 | 29.73  | 8.72 |
| H3BKNO   | tRNA (cytosine(34)-C(5))-methyltransferase OS=Mus musculus GN=Nsun2 PE=2 SV=1 - [H3BKNO_MOUSE]            | 4.16  | 3  | 2  | 2  | 3  | 1.18 | 1.12 | 0.95 | 1.01 | 0.86 | 0.91 | 0.77 | 1.02 | 0.87 | 1.04 | 0.88 | 1.03 | 0.88 | 81.32  | 6.77 |
| Q8BGY3   | Leucine zipper protein 2 OS=Mus musculus GN=Luzp2 PE=2 SV=1 - [LUZP2_MOUSE]                               | 24.35 | 1  | 6  | 7  | 13 | 1.05 | 1.06 | 0.88 | 0.91 | 0.87 | 1.06 | 0.96 | 1.02 | 1.01 | 0.94 | 0.93 | 0.93 | 0.89 | 39.00  | 8.50 |
| Q91YE7-2 | Isoform 2 of RNA-binding protein 5 OS=Mus musculus GN=Rbm5 - [RBMS_MOUSE]                                 | 7.99  | 2  | 5  | 5  | 29 | 0.90 | 0.79 | 0.91 | 0.93 | 0.98 | 1.06 | 1.16 | 1.02 | 1.16 | 0.99 | 1.20 | 0.88 | 0.97 | 92.18  | 6.21 |
| B2RRE2   | Myo18a protein OS=Mus musculus GN=Myo18a PE=2 SV=1 - [B2RRE2_MOUSE]                                       | 28.04 | 12 | 42 | 43 | 96 | 0.95 | 1.01 | 1.03 | 1.03 | 1.08 | 0.99 | 1.04 | 1.02 | 1.06 | 0.97 | 1.03 | 0.98 | 1.01 | 231.99 | 6.10 |
| Q8VB19   | Tether containing UBX domain for GLUT4 OS=Mus musculus GN=Aspcr1 PE=1 SV=1 - [ASPC1_MOUSE]                | 14.73 | 12 | 5  | 5  | 10 | 0.91 | 1.05 | 1.17 | 1.00 | 1.14 | 1.02 | 1.10 | 1.02 | 1.06 | 1.06 | 1.22 | 0.99 | 1.14 | 59.76  | 6.96 |
| Q6VH22   | Intraflagellar transport protein 172 homolog OS=Mus musculus GN=Ifi172 PE=1 SV=1 - [IFI172_MOUSE]         | 2.00  | 1  | 1  | 1  | 3  | 1.49 | 1.76 | 1.18 | 1.15 | 0.77 | 1.33 | 0.89 | 1.02 | 0.69 | 0.96 | 0.64 | 1.26 | 0.85 | 197.42 | 6.02 |
| P18242   | Cathepsin D OS=Mus musculus GN=Ctsd PE=1 SV=1 - [CATD_MOUSE]                                              | 33.17 | 3  | 10 | 10 | 33 | 1.01 | 0.83 | 0.94 | 0.97 | 1.00 | 1.00 | 1.01 | 1.02 | 1.02 | 0.95 | 1.01 | 0.95 | 1.04 | 44.92  | 7.15 |
| Q9Z2A9-2 | Isoform 2 of Gamma-glutamyltransferase 5 OS=Mus musculus GN=Ggt5 [GGT5_MOUSE]                             | 2.19  | 3  | 1  | 1  | 1  | 1.31 | 1.44 | 1.10 | 1.14 | 0.87 | 1.31 | 1.00 | 1.02 | 0.78 | 1.13 | 0.86 | 1.26 | 0.97 | 49.33  | 7.84 |
| H3BK68   | tRNA (guanine(26)-N(2))-dimethyltransferase (Fragment) OS=Mus musculus GN=Tmt1 PE=2 SV=1 - [H3BK68_MOUSE] | 8.60  | 7  | 1  | 1  | 3  | 1.03 | 1.17 | 1.14 | 0.94 | 0.91 | 1.02 | 0.99 | 1.02 | 0.99 | 1.07 | 1.05 | 1.15 | 1.12 | 24.15  | 5.66 |
| Q9Z0M3   | Cadherin-20 OS=Mus musculus GN=Cdh20 PE=2 SV=1 - [CAD20_MOUSE]                                            | 2.87  | 1  | 1  | 2  | 3  | 0.99 | 1.06 | 1.06 | 1.08 | 1.09 | 1.10 | 1.11 | 1.02 | 1.03 | 1.05 | 1.06 | 1.03 | 1.04 | 88.94  | 4.72 |

|        |                                                                                                                   |       |   |    |    |     |      |      |      |      |      |      |      |      |      |      |      |      |      |       |      |
|--------|-------------------------------------------------------------------------------------------------------------------|-------|---|----|----|-----|------|------|------|------|------|------|------|------|------|------|------|------|------|-------|------|
| D3YZ18 | High mobility group protein B1 (Fragment) OS=Mus musculus GN=Hmgb1 PE=2 SV=1 - [D3YZ18_MOUSE]                     | 64.80 | 2 | 1  | 8  | 160 | 0.74 | 0.82 | 1.10 | 0.86 | 1.16 | 1.19 | 1.60 | 1.02 | 1.37 | 0.89 | 1.20 | 0.82 | 1.11 | 14.42 | 9.76 |
| Q9DAK9 | 14 kDa phosphohistidine phosphatase OS=Mus musculus GN=Phpt1 PE=1 SV=1 - [PHP14_MOUSE]                            | 56.45 | 1 | 7  | 7  | 43  | 0.97 | 0.75 | 0.79 | 0.87 | 0.92 | 0.99 | 1.06 | 1.02 | 1.08 | 0.90 | 0.89 | 0.83 | 0.91 | 13.99 | 5.53 |
| Q8C0P5 | Coronin-2A OS=Mus musculus GN=Coro2a PE=2 SV=1 - [COR2A_MOUSE]                                                    | 6.87  | 2 | 3  | 4  | 6   | 1.01 | 1.36 | 1.28 | 1.16 | 1.11 | 0.92 | 0.95 | 1.02 | 1.01 | 0.95 | 0.90 | 1.06 | 1.00 | 59.54 | 7.71 |
| Q8C008 | Double zinc ribbon and ankyrin repeat-containing protein 1 OS=Mus musculus GN=Dzank1 PE=1 SV=2 - [DZAN1_MOUSE]    | 17.87 | 2 | 10 | 10 | 15  | 1.14 | 1.03 | 1.15 | 1.01 | 0.92 | 1.12 | 1.05 | 1.02 | 0.92 | 1.03 | 0.95 | 1.08 | 0.99 | 84.97 | 8.18 |
| Q924D0 | Reticulon-4-interacting protein 1, mitochondrial OS=Mus musculus GN=Rtn4ip1 PE=1 SV=2 - [RT4I1_MOUSE]             | 2.78  | 1 | 1  | 1  | 3   | 0.96 | 0.86 | 0.89 | 0.92 | 0.96 | 1.15 | 1.19 | 1.02 | 1.06 | 1.02 | 1.06 | 1.01 | 1.05 | 43.34 | 9.20 |
| Q6PGF7 | Exocyst complex component 8 OS=Mus musculus GN=Exoc8 PE=1 SV=1 - [EXOC8_MOUSE]                                    | 20.67 | 1 | 10 | 10 | 39  | 0.99 | 1.11 | 1.08 | 1.09 | 1.09 | 0.99 | 0.99 | 1.02 | 1.05 | 1.03 | 1.04 | 1.08 | 1.09 | 80.98 | 5.40 |
| Q9DBC7 | cAMP-dependent protein kinase type I-alpha regulatory subunit OS=Mus musculus GN=Prkar1a PE=1 SV=3 - [KAP0_MOUSE] | 40.42 | 3 | 9  | 13 | 30  | 0.94 | 1.02 | 1.13 | 1.02 | 1.06 | 1.06 | 1.14 | 1.02 | 1.18 | 1.08 | 1.21 | 1.10 | 1.20 | 43.16 | 5.35 |
| Q6VNS1 | NT-3 growth factor receptor OS=Mus musculus GN=Ntrk3 PE=1 SV=1 - [NTRK3_MOUSE]                                    | 14.42 | 3 | 6  | 9  | 14  | 0.94 | 1.16 | 1.32 | 1.05 | 1.10 | 0.97 | 1.00 | 1.02 | 1.17 | 0.90 | 1.03 | 1.01 | 1.16 | 92.70 | 6.67 |
| Q9CQ91 | NADH dehydrogenase [ubiquinone] 1 alpha subcomplex subunit 3 OS=Mus musculus GN=Ndufa3 PE=1 SV=1 - [NDUA3_MOUSE]  | 50.00 | 2 | 4  | 4  | 13  | 1.02 | 1.07 | 1.22 | 1.09 | 1.04 | 0.97 | 0.99 | 1.02 | 0.91 | 1.04 | 0.95 | 1.06 | 1.00 | 9.32  | 8.47 |
| Q80U57 | Regulating synaptic membrane exocytosis protein 3 OS=Mus musculus GN=Rims3 PE=1 SV=2 - [RIMS3_MOUSE]              | 30.29 | 2 | 5  | 6  | 11  | 0.96 | 1.06 | 1.22 | 1.11 | 1.13 | 1.02 | 1.06 | 1.02 | 1.04 | 0.92 | 0.92 | 1.01 | 1.03 | 32.57 | 9.29 |
| Q8VCN9 | Tubulin-specific chaperone C OS=Mus musculus GN=Tbcc PE=2 SV=1 - [TBCC_MOUSE]                                     | 24.63 | 1 | 8  | 8  | 14  | 0.99 | 1.05 | 1.08 | 0.96 | 0.95 | 0.93 | 0.95 | 1.02 | 0.96 | 0.94 | 0.95 | 1.01 | 1.07 | 38.10 | 5.30 |

|          |                                                                                                                         |       |   |    |    |    |      |      |      |      |      |      |      |      |      |      |      |      |      |        |      |
|----------|-------------------------------------------------------------------------------------------------------------------------|-------|---|----|----|----|------|------|------|------|------|------|------|------|------|------|------|------|------|--------|------|
| Q8BP01   | Vimentin-type intermediate filament-associated coiled-coil protein OS=Mus musculus GN=Vmac PE=2 SV=1 - [VMAC_MOUSE]     | 4.60  | 1 | 1  | 1  | 1  | 0.71 | 0.96 | 1.35 | 0.81 | 1.14 | 0.99 | 1.39 | 1.02 | 1.44 | 1.33 | 1.87 | 1.18 | 1.66 | 19.01  | 5.39 |
| O35615   | Zinc finger protein ZFPM1 OS=Mus musculus GN=Zfpm1 PE=1 SV=1 - [FOG1_MOUSE]                                             | 2.21  | 1 | 1  | 1  | 1  | 1.08 | 0.77 | 0.71 | 1.10 | 1.02 | 1.31 | 1.21 | 1.02 | 0.94 | 1.11 | 1.03 | 1.18 | 1.10 | 105.92 | 6.89 |
| Q3UKJ7-2 | Isoform 2 of WD40 repeat-containing protein SMU1 OS=Mus musculus GN=Smu1 - [SMU1_MOUSE]                                 | 6.93  | 2 | 2  | 2  | 2  | 0.95 | 0.99 | 1.04 | 0.80 | 0.84 | 1.03 | 1.08 | 1.02 | 1.07 | 1.10 | 1.16 | 1.03 | 1.09 | 37.52  | 6.65 |
| Q8BGR9   | Ubiquitin-like domain-containing CTD phosphatase 1 OS=Mus musculus GN=Ublcp1 PE=1 SV=1 - [UBCP1_MOUSE]                  | 5.97  | 2 | 2  | 2  | 4  | 0.89 | 1.01 | 1.14 | 1.01 | 1.14 | 0.95 | 1.06 | 1.03 | 1.15 | 0.89 | 1.01 | 0.85 | 0.96 | 36.81  | 6.46 |
| Q9QYJ0   | DnaJ homolog subfamily A member 2 OS=Mus musculus GN=Dnaj2 PE=1 SV=1 - [DNJA2_MOUSE]                                    | 42.23 | 1 | 12 | 12 | 63 | 0.95 | 0.83 | 0.79 | 0.95 | 0.98 | 1.00 | 0.97 | 1.03 | 1.01 | 0.89 | 0.91 | 0.99 | 0.89 | 45.72  | 6.48 |
| Q8BWU5   | Probable tRNA threonylcarbamoyladen osine biosynthesis protein Osgep OS=Mus musculus GN=Osgep PE=2 SV=2 - [OSGEP_MOUSE] | 8.06  | 4 | 2  | 2  | 4  | 0.98 | 1.11 | 1.13 | 1.11 | 1.13 | 0.96 | 0.97 | 1.03 | 1.04 | 1.09 | 1.11 | 1.11 | 1.13 | 36.28  | 6.24 |
| Q5SXA9   | Protein KIBRA OS=Mus musculus GN=Wwc1 PE=1 SV=1 - [KIBRA_MOUSE]                                                         | 0.63  | 1 | 1  | 1  | 1  | 1.05 | 1.02 | 0.97 | 0.92 | 0.87 | 0.97 | 0.92 | 1.03 | 0.97 | 0.98 | 0.93 | 1.09 | 1.04 | 124.03 | 5.97 |
| A2AD03   | Rab proteins geranylgeranyltransferase component A 1 OS=Mus musculus GN=Chm PE=2 SV=1 - [A2AD03_MOUSE]                  | 15.86 | 4 | 7  | 7  | 13 | 1.09 | 0.99 | 0.96 | 1.07 | 1.01 | 1.05 | 0.93 | 1.03 | 0.97 | 1.00 | 1.01 | 1.13 | 1.04 | 73.62  | 4.69 |
| Q8BXA5   | Cleft lip and palate transmembrane protein 1-like protein OS=Mus musculus GN=Ciptm11 PE=2 SV=1 - [CLP1L_MOUSE]          | 2.97  | 1 | 1  | 1  | 2  | 0.75 | 1.22 | 1.62 | 0.90 | 1.20 | 0.74 | 0.99 | 1.03 | 1.36 | 0.58 | 0.77 | 0.82 | 1.09 | 62.14  | 8.84 |
| P60882   | Multiple epidermal growth factor-like domains protein 8 OS=Mus musculus GN=Megf8 PE=2 SV=2 - [MEGF8_MOUSE]              | 0.86  | 1 | 2  | 2  | 4  | 1.03 | 1.54 | 1.48 | 1.00 | 0.97 | 0.95 | 0.92 | 1.03 | 0.99 | 1.01 | 0.98 | 1.07 | 1.04 | 297.29 | 6.80 |

|          |                                                                                                             |       |   |    |    |     |      |      |      |      |      |      |      |      |      |      |      |      |      |        |       |
|----------|-------------------------------------------------------------------------------------------------------------|-------|---|----|----|-----|------|------|------|------|------|------|------|------|------|------|------|------|------|--------|-------|
| Q922Q8   | Leucine-rich repeat-containing protein 59<br>OS=Mus musculus<br>GN=Lrc59 PE=2<br>SV=1 -<br>[LRC59_MOUSE]    | 31.27 | 1 | 8  | 8  | 17  | 0.88 | 0.87 | 1.11 | 0.97 | 1.08 | 1.06 | 1.09 | 1.03 | 1.08 | 1.10 | 1.06 | 0.82 | 1.01 | 34.86  | 9.52  |
| Q9CQU0   | Thioredoxin domain-containing protein 12<br>OS=Mus musculus<br>GN=Txndc12 PE=2<br>SV=1 -<br>[TXD12_MOUSE]   | 31.18 | 1 | 4  | 4  | 22  | 0.94 | 0.76 | 0.81 | 0.89 | 0.99 | 1.07 | 1.06 | 1.03 | 1.12 | 0.94 | 1.02 | 0.85 | 0.90 | 19.04  | 5.26  |
| Q6PH08-4 | Isoform 4 of ERC protein 2<br>OS=Mus musculus<br>GN=Ercc2 -<br>[ERC2_MOUSE]                                 | 50.10 | 1 | 2  | 24 | 198 | 1.06 | 1.08 | 1.13 | 0.87 | 0.89 | 0.98 | 1.08 | 1.03 | 0.98 | 0.91 | 0.90 | 0.89 | 0.84 | 59.67  | 8.41  |
| Q3UF95   | Large proline-rich protein BAG6<br>OS=Mus musculus<br>GN=Bag6 PE=2 SV=1<br>[Q3UF95_MOUSE]                   | 15.23 | 8 | 11 | 11 | 26  | 0.96 | 1.20 | 1.27 | 1.10 | 1.17 | 1.06 | 1.02 | 1.03 | 1.03 | 1.12 | 1.10 | 1.16 | 1.17 | 119.07 | 5.82  |
| Q8BN16   | Neuropilin and toll-like protein 2<br>OS=Mus musculus<br>GN=Neto2 PE=1 SV=1 -<br>[NETO2_MOUSE]              | 4.00  | 2 | 2  | 2  | 2   | 0.89 | 0.99 | 1.11 | 0.99 | 1.12 | 1.02 | 1.15 | 1.03 | 1.15 | 1.05 | 1.18 | 1.34 | 1.51 | 59.33  | 6.77  |
| Q9WUA6   | Isoform 2 of RAC-gamma serine/threonine-protein kinase<br>OS=Mus musculus<br>GN=Akt3 -<br>[AKT3_MOUSE]      | 8.09  | 2 | 1  | 3  | 6   | 1.08 | 1.00 | 0.93 | 0.99 | 0.92 | 0.95 | 0.88 | 1.03 | 0.95 | 0.96 | 0.90 | 1.14 | 1.06 | 54.60  | 6.70  |
| Q9CXE7   | Transmembrane emp24 domain-containing protein 5<br>OS=Mus musculus<br>GN=Tmed5 PE=2 SV=1 -<br>[TMED5_MOUSE] | 10.04 | 2 | 2  | 2  | 3   | 0.93 | 0.79 | 0.85 | 1.03 | 1.11 | 1.00 | 1.07 | 1.03 | 1.10 | 0.94 | 1.02 | 0.93 | 1.00 | 26.16  | 4.93  |
| Q9CZL5   | Pterin-4-alpha-carbinolamine dehydratase 2<br>OS=Mus musculus<br>GN=Pcbd2 PE=1 SV=2 -<br>[PHS2_MOUSE]       | 41.91 | 1 | 5  | 5  | 16  | 1.21 | 0.80 | 0.71 | 0.95 | 0.77 | 1.04 | 0.84 | 1.03 | 0.79 | 1.03 | 0.86 | 0.90 | 0.76 | 14.82  | 9.16  |
| B2RQR5   | Small G protein signaling modulator 1<br>OS=Mus musculus<br>GN=Sgsm1 PE=2<br>SV=1 -<br>[B2RQR5_MOUSE]       | 7.04  | 7 | 5  | 5  | 11  | 1.13 | 1.35 | 1.15 | 1.06 | 0.95 | 1.10 | 0.98 | 1.03 | 0.91 | 1.22 | 1.11 | 1.36 | 1.11 | 123.19 | 5.66  |
| P35550   | rRNA 2'-O-methyltransferase fibrillarin<br>OS=Mus musculus<br>GN=Fbl PE=1 SV=2 -<br>[FBRL_MOUSE]            | 22.94 | 1 | 4  | 6  | 7   | 1.12 | 0.80 | 0.89 | 1.23 | 0.99 | 0.99 | 0.87 | 1.03 | 1.04 | 1.05 | 0.94 | 1.05 | 0.85 | 34.29  | 10.24 |
| Q92518   | OL-protocadherin isoform<br>OS=Mus musculus<br>GN=Pedh10 PE=2 SV=1 -<br>[Q92518_MOUSE]                      | 15.19 | 3 | 10 | 10 | 33  | 1.04 | 1.13 | 1.11 | 0.94 | 0.97 | 0.99 | 1.02 | 1.03 | 0.95 | 1.04 | 1.03 | 1.06 | 0.99 | 113.07 | 4.92  |

|          |                                                                                                                          |       |   |   |    |    |      |      |      |      |      |       |       |      |      |      |      |      |      |       |       |
|----------|--------------------------------------------------------------------------------------------------------------------------|-------|---|---|----|----|------|------|------|------|------|-------|-------|------|------|------|------|------|------|-------|-------|
| Q921L3   | Transmembrane and coiled-coil domain-containing protein 1<br>OS=Mus musculus<br>GN=Tmco1 PE=2<br>SV=1 -<br>[TMCO1_MOUSE] | 11.70 | 1 | 2 | 2  | 3  | 1.04 | 1.11 | 1.07 | 1.11 | 1.07 | 0.84  | 0.80  | 1.03 | 0.99 | 0.97 | 0.93 | 1.02 | 0.98 | 21.16 | 9.74  |
| D3Z5Q9   | Tropomodulin-4 (Fragment)<br>OS=Mus musculus<br>GN=Tmod4 PE=2<br>SV=1 -<br>[D3Z5Q9_MOUSE]                                | 11.41 | 2 | 2 | 2  | 5  | 0.97 | 1.33 | 1.37 | 0.71 | 0.73 | 23.98 | 24.59 | 1.03 | 1.05 | 1.05 | 1.09 | 1.30 | 1.35 | 20.98 | 4.41  |
| Q9QXA5   | U6 snRNA-associated Sm-like protein LSM4<br>OS=Mus musculus<br>GN=Lsm4 PE=2<br>SV=1 -<br>[LSM4_MOUSE]                    | 16.06 | 3 | 2 | 2  | 5  | 1.04 | 0.99 | 0.99 | 0.81 | 0.80 | 1.04  | 0.94  | 1.03 | 0.98 | 0.92 | 0.85 | 0.84 | 0.78 | 15.07 | 10.05 |
| Q9JJV5   | Voltage-dependent calcium channel gamma-3 subunit<br>OS=Mus musculus<br>GN=Cacng3 PE=1<br>SV=2 -<br>[CCG3_MOUSE]         | 13.97 | 1 | 2 | 4  | 7  | 0.95 | 0.70 | 0.74 | 1.08 | 1.14 | 1.14  | 1.20  | 1.03 | 1.08 | 0.87 | 0.92 | 0.90 | 0.95 | 35.49 | 9.48  |
| G3X8R5   | Glutamine-rich protein 1<br>OS=Mus musculus<br>GN=Qrich1 PE=4<br>SV=1 -<br>[G3X8R5_MOUSE]                                | 1.16  | 2 | 1 | 1  | 3  | 1.29 | 0.73 | 0.57 | 1.03 | 0.80 | 1.12  | 0.86  | 1.03 | 0.79 | 1.09 | 0.84 | 1.12 | 0.87 | 86.47 | 5.87  |
| P9J752   | Sodium channel subunit beta-1<br>OS=Mus musculus<br>GN=Scn1b PE=2<br>SV=1 -<br>[SCN1B_MOUSE]                             | 21.56 | 1 | 6 | 6  | 23 | 1.21 | 1.12 | 0.98 | 1.17 | 1.03 | 1.08  | 0.99  | 1.03 | 0.87 | 1.00 | 0.86 | 1.08 | 0.93 | 24.63 | 4.83  |
| P62264   | 40S ribosomal protein S14<br>OS=Mus musculus<br>GN=Rps14 PE=2<br>SV=3 -<br>[RS14_MOUSE]                                  | 22.52 | 3 | 3 | 3  | 16 | 0.90 | 1.00 | 0.94 | 0.96 | 0.99 | 0.98  | 1.07  | 1.03 | 0.96 | 0.99 | 0.95 | 1.09 | 1.08 | 16.26 | 10.05 |
| Q9Z204   | Heterogeneous nuclear ribonucleoproteins C1/C2<br>OS=Mus musculus<br>GN=Hnrpc PE=1<br>SV=1 -<br>[HNRPC_MOUSE]            | 46.33 | 2 | 1 | 10 | 41 | 0.92 | 0.57 | 0.62 | 0.68 | 0.73 | 0.81  | 0.88  | 1.03 | 1.11 | 1.06 | 1.16 | 1.16 | 1.27 | 34.36 | 5.05  |
| D3YU96   | Cytohesin-2<br>OS=Mus musculus<br>GN=Cyth2 PE=2<br>SV=1 -<br>[D3YU96_MOUSE]                                              | 35.51 | 8 | 8 | 12 | 34 | 0.97 | 1.06 | 1.05 | 1.08 | 1.09 | 1.02  | 1.01  | 1.03 | 1.07 | 1.00 | 1.01 | 1.00 | 1.05 | 44.63 | 6.38  |
| Q9D7H3   | RNA 3'-terminal phosphate cyclase<br>OS=Mus musculus<br>GN=RtcA PE=2<br>SV=2 -<br>[RTCA_MOUSE]                           | 7.38  | 4 | 2 | 2  | 4  | 1.02 | 1.40 | 1.37 | 1.13 | 1.11 | 0.87  | 0.85  | 1.03 | 1.01 | 1.01 | 0.99 | 1.24 | 1.23 | 39.23 | 7.90  |
| Q8R332-4 | Isoform 4 of Nucleoporin p58/p45<br>OS=Mus musculus<br>GN=Nupl1 -<br>[NUPL1_MOUSE]                                       | 7.89  | 4 | 4 | 4  | 6  | 0.94 | 0.98 | 1.05 | 0.87 | 0.93 | 0.98  | 1.01  | 1.03 | 1.08 | 0.87 | 0.94 | 0.86 | 0.95 | 53.97 | 8.31  |
| Q8BHN1   | Isoform 3 of Gamma-taxilin<br>OS=Mus musculus<br>GN=Txlng -<br>[TXLNG_MOUSE]                                             | 3.79  | 2 | 1 | 2  | 4  | 1.07 | 0.92 | 0.86 | 0.90 | 0.83 | 1.12  | 1.04  | 1.03 | 0.95 | 0.91 | 0.85 | 1.04 | 0.97 | 54.98 | 8.50  |

|          |                                                                                                                                                               |       |   |    |    |      |      |      |      |      |      |      |      |      |      |      |      |      |      |        |      |
|----------|---------------------------------------------------------------------------------------------------------------------------------------------------------------|-------|---|----|----|------|------|------|------|------|------|------|------|------|------|------|------|------|------|--------|------|
| E9Q7C0   | Protein<br>1700030K09Rik<br>OS=Mus musculus<br>GN=1700030K09Rik<br>PE=2 SV=1 -<br>[E9Q7C0_MOUSE]                                                              | 2.31  | 2 | 1  | 1  | 1    | 0.80 | 0.88 | 1.10 | 0.93 | 1.17 | 1.11 | 1.38 | 1.03 | 1.29 | 1.05 | 1.33 | 1.01 | 1.27 | 65.38  | 5.94 |
| Q01279   | Epidermal growth<br>factor receptor<br>OS=Mus musculus<br>GN=Egfr PE=1 SV=1 -<br>[EGFR_MOUSE]                                                                 | 3.80  | 3 | 4  | 4  | 6    | 1.02 | 1.23 | 1.14 | 0.99 | 0.95 | 0.92 | 0.85 | 1.03 | 0.96 | 1.03 | 1.01 | 1.13 | 1.06 | 134.77 | 6.86 |
| O88844   | Isocitrate<br>dehydrogenase<br>[NADP] cytoplasmic<br>OS=Mus musculus<br>GN=Idh1 PE=1 SV=2 -<br>[IDHC_MOUSE]                                                   | 42.75 | 2 | 14 | 15 | 50   | 1.02 | 0.87 | 0.90 | 1.05 | 1.02 | 1.11 | 1.04 | 1.03 | 1.01 | 1.08 | 1.10 | 1.10 | 1.01 | 46.64  | 7.17 |
| G5E8V8   | Phosphorylated adapter<br>RNA export protein<br>OS=Mus musculus<br>GN=Phax PE=4 SV=1 -<br>[G5E8V8_MOUSE]                                                      | 25.62 | 3 | 7  | 7  | 17   | 1.03 | 0.97 | 0.94 | 1.03 | 0.86 | 1.07 | 0.99 | 1.03 | 0.88 | 0.93 | 0.83 | 0.98 | 0.80 | 40.84  | 6.02 |
| D3Z0S1   | Annexin (Fragment)<br>OS=Mus musculus<br>GN=Anxa4 PE=2<br>SV=1 -<br>[D3Z0S1_MOUSE]                                                                            | 19.29 | 3 | 3  | 4  | 8    | 1.00 | 1.11 | 1.11 | 1.08 | 1.08 | 0.96 | 0.88 | 1.03 | 1.03 | 1.03 | 1.10 | 0.98 | 0.99 | 28.53  | 5.35 |
| Q810A7   | ATP-dependent RNA<br>helicase DDX42<br>OS=Mus musculus<br>GN=Ddx42 PE=1<br>SV=3 -<br>[DDX42_MOUSE]                                                            | 18.73 | 2 | 11 | 11 | 29   | 0.87 | 0.89 | 0.91 | 0.95 | 1.08 | 0.99 | 1.17 | 1.03 | 1.15 | 0.94 | 1.14 | 0.98 | 1.12 | 101.90 | 6.98 |
| Q76LL6-3 | Isoform 3 of FHL1/FH2<br>domain-containing<br>protein 3 OS=Mus<br>musculus GN=Fhod3 -<br>[FHOD3_MOUSE]                                                        | 2.05  | 4 | 2  | 2  | 12   | 1.10 | 1.25 | 1.18 | 1.22 | 1.10 | 1.11 | 0.94 | 1.03 | 0.93 | 1.00 | 0.79 | 1.16 | 0.92 | 158.18 | 5.83 |
| Q8R5A3   | Amyloid beta A4<br>precursor protein-<br>binding family B<br>member 1-interacting<br>protein OS=Mus<br>musculus<br>GN=Apbb1ip PE=1<br>SV=2 -<br>[AB1IP_MOUSE] | 3.88  | 1 | 1  | 3  | 4    | 1.01 | 0.85 | 0.84 | 0.97 | 0.96 | 0.92 | 0.90 | 1.03 | 1.01 | 0.94 | 0.93 | 0.86 | 0.85 | 74.27  | 5.35 |
| Q8BME9   | Cerebellin-4 OS=Mus<br>musculus GN=Cbln4<br>PE=1 SV=1 -<br>[CBLN4_MOUSE]                                                                                      | 7.07  | 1 | 1  | 1  | 1    | 1.16 | 1.17 | 1.01 | 1.05 | 0.90 | 0.80 | 0.68 | 1.03 | 0.88 | 0.94 | 0.81 | 0.90 | 0.77 | 21.60  | 8.73 |
| Q62167   | ATP-dependent RNA<br>helicase DDX3X<br>OS=Mus musculus<br>GN=Ddx3x PE=1<br>SV=3 -<br>[DDX3X_MOUSE]                                                            | 35.20 | 4 | 4  | 19 | 46   | 1.01 | 1.32 | 1.41 | 1.05 | 1.04 | 0.99 | 1.03 | 1.03 | 1.02 | 0.92 | 0.91 | 1.04 | 1.00 | 73.06  | 7.18 |
| O35874   | Neutral amino acid<br>transporter A OS=Mus<br>musculus GN=Slc1a4<br>PE=1 SV=1 -<br>[SATT_MOUSE]                                                               | 14.47 | 2 | 4  | 6  | 41   | 1.15 | 1.36 | 1.14 | 1.11 | 1.09 | 0.95 | 0.80 | 1.03 | 0.91 | 1.07 | 0.98 | 1.08 | 0.94 | 56.03  | 5.87 |
| Q7TMM9   | Tubulin beta-2A chain<br>OS=Mus musculus<br>GN=Tubb2a PE=1<br>SV=1 -<br>[TBB2A_MOUSE]                                                                         | 84.04 | 2 | 3  | 30 | 1962 | 1.02 | 0.85 | 0.82 | 1.00 | 1.01 | 1.11 | 1.06 | 1.03 | 1.00 | 1.09 | 1.07 | 1.05 | 1.02 | 49.87  | 4.89 |

|          |                                                                                                                  |       |   |    |    |     |      |      |      |      |      |       |       |      |      |      |      |      |      |       |      |
|----------|------------------------------------------------------------------------------------------------------------------|-------|---|----|----|-----|------|------|------|------|------|-------|-------|------|------|------|------|------|------|-------|------|
| E9Q705   | Bola-like protein 3<br>OS=Mus musculus<br>GN=Bola3 PE=2 SV=1<br>-[E9Q705_MOUSE]                                  | 27.37 | 3 | 3  | 3  | 9   | 0.73 | 0.57 | 0.79 | 0.85 | 1.12 | 1.05  | 1.42  | 1.03 | 1.40 | 0.91 | 1.25 | 0.75 | 0.87 | 10.82 | 8.31 |
| Q5TY86-2 | Isoform 3 of Apoptosis-inducing factor 3<br>OS=Mus musculus<br>GN=Aifm3 -<br>[AIFM3_MOUSE]                       | 10.40 | 3 | 4  | 4  | 5   | 0.99 | 0.89 | 0.82 | 1.12 | 1.00 | 0.99  | 1.06  | 1.03 | 1.27 | 0.98 | 1.07 | 1.04 | 1.07 | 55.00 | 9.25 |
| Q9D8P7   | General transcription factor 3C polypeptide 6<br>OS=Mus musculus<br>GN=Gtf3c6 PE=2<br>SV=1 -<br>[TF3C6_MOUSE]    | 7.05  | 1 | 1  | 1  | 2   | 0.89 | 0.53 | 0.60 | 0.88 | 0.99 | 1.26  | 1.41  | 1.03 | 1.15 | 0.95 | 1.07 | 0.86 | 0.96 | 25.53 | 4.22 |
| P70333   | Heterogeneous nuclear ribonucleoprotein H2<br>OS=Mus musculus<br>GN=Hnrnp2 PE=1<br>SV=1 -<br>[HNRH2_MOUSE]       | 40.98 | 2 | 6  | 13 | 107 | 0.93 | 0.90 | 0.97 | 0.98 | 1.07 | 0.99  | 1.07  | 1.03 | 1.07 | 0.97 | 1.04 | 0.94 | 1.07 | 49.25 | 6.30 |
| Q91YL3   | Uridine-cytidine kinase-like 1<br>OS=Mus musculus<br>GN=Uck1<br>PE=1 SV=1 -<br>[UCKL1_MOUSE]                     | 5.11  | 2 | 2  | 2  | 4   | 0.70 | 0.88 | 1.26 | 0.74 | 1.06 | 1.17  | 1.68  | 1.03 | 1.47 | 1.10 | 1.59 | 0.87 | 1.25 | 60.80 | 7.15 |
| P86792   | C-C motif chemokine 21b<br>OS=Mus musculus<br>GN=Ccl21b PE=1<br>SV=1 -<br>[CC21B_MOUSE]                          | 13.53 | 1 | 1  | 1  | 2   | 0.92 | 0.55 | 0.59 | 0.90 | 0.97 | 0.84  | 0.90  | 1.03 | 1.11 | 1.05 | 1.14 | 1.08 | 1.17 | 14.57 | 9.88 |
| P97447   | Four and a half LIM domains protein 1<br>OS=Mus musculus<br>GN=Fhl1 PE=2 SV=3 -<br>[FHL1_MOUSE]                  | 44.29 | 9 | 10 | 10 | 89  | 1.16 | 0.88 | 0.77 | 0.91 | 0.80 | 1.17  | 1.03  | 1.03 | 0.90 | 1.08 | 0.97 | 1.02 | 0.93 | 31.87 | 8.37 |
| P20801   | Troponin C, skeletal muscle<br>OS=Mus musculus<br>GN=Tnnc2<br>PE=1 SV=2 -<br>[TNNC2_MOUSE]                       | 22.50 | 1 | 2  | 3  | 5   | 0.97 | 1.53 | 1.58 | 0.75 | 0.77 | 11.39 | 11.30 | 1.03 | 0.96 | 1.20 | 1.07 | 1.03 | 1.13 | 18.10 | 4.20 |
| P58389   | Serine/threonine-protein phosphatase 2A activator<br>OS=Mus musculus<br>GN=Ppp2r4<br>PE=1 SV=1 -<br>[PTPA_MOUSE] | 13.62 | 4 | 3  | 3  | 7   | 1.10 | 1.24 | 0.98 | 1.15 | 1.04 | 0.98  | 0.85  | 1.03 | 0.89 | 1.08 | 0.92 | 1.09 | 1.04 | 36.69 | 6.39 |
| Q8BHN0   | Protein phosphatase 1L<br>OS=Mus musculus<br>GN=Ppm1l PE=1<br>SV=1 -<br>[PPM1L_MOUSE]                            | 14.44 | 3 | 4  | 4  | 7   | 0.94 | 1.10 | 1.18 | 1.09 | 1.16 | 1.00  | 1.29  | 1.03 | 1.10 | 1.02 | 1.17 | 0.94 | 0.96 | 41.02 | 5.99 |
| Q3V0I2   | Proline-rich protein 7<br>OS=Mus musculus<br>GN=Prr7 PE=2 SV=1 -<br>[PRR7_MOUSE]                                 | 18.22 | 1 | 3  | 3  | 5   | 1.16 | 1.05 | 1.01 | 1.04 | 1.03 | 1.04  | 0.91  | 1.03 | 0.96 | 0.99 | 0.88 | 1.24 | 1.10 | 30.33 | 8.60 |
| Q3UHG7-  | Isoform 2 of Protein LCHN<br>OS=Mus musculus<br>GN=Lchn -<br>[LCHN_MOUSE]                                        | 3.58  | 2 | 1  | 1  | 2   | 1.10 | 1.46 | 1.33 | 1.26 | 1.15 | 0.94  | 0.85  | 1.03 | 0.94 | 1.06 | 0.97 | 1.09 | 0.99 | 44.23 | 5.58 |
| Q8C729   | Protein FAM126B<br>OS=Mus musculus<br>GN=Fam126b PE=1<br>SV=1 -<br>[F126B_MOUSE]                                 | 14.72 | 3 | 7  | 7  | 16  | 1.02 | 0.94 | 0.96 | 1.05 | 1.09 | 0.95  | 1.00  | 1.03 | 1.07 | 0.98 | 1.05 | 0.95 | 1.06 | 58.55 | 7.72 |



|          |                                                                                                                |       |   |    |    |    |      |      |      |      |      |      |      |      |      |      |      |      |      |        |      |
|----------|----------------------------------------------------------------------------------------------------------------|-------|---|----|----|----|------|------|------|------|------|------|------|------|------|------|------|------|------|--------|------|
| Q5DTT1   | Uncharacterized protein KIAA2022 OS=Mus musculus GN=Kiaa2022 PE=2 SV=3 - [K2022_MOUSE]                         | 0.66  | 1 | 1  | 1  | 1  | 1.50 | 0.80 | 0.54 | 0.94 | 0.63 | 1.14 | 0.76 | 1.03 | 0.68 | 1.03 | 0.69 | 1.25 | 0.84 | 167.00 | 5.97 |
| D3YTS3   | Protein D630045J12Rik OS=Mus musculus GN=D630045J12Rik PE=2 SV=1 - [D3YTS3_MOUSE]                              | 10.60 | 2 | 2  | 12 | 28 | 1.02 | 1.08 | 1.08 | 1.13 | 1.09 | 1.00 | 0.96 | 1.03 | 0.99 | 1.01 | 0.97 | 0.89 | 0.84 | 179.10 | 6.34 |
| Q9QWH1   | Polyhomeotic-like protein 2 OS=Mus musculus GN=Pbc2 PE=1 SV=1 - [PHC2_MOUSE]                                   | 7.65  | 3 | 3  | 3  | 7  | 1.14 | 1.07 | 0.94 | 0.95 | 0.76 | 1.25 | 1.07 | 1.03 | 0.89 | 0.98 | 0.80 | 1.02 | 0.83 | 89.74  | 8.75 |
| Q59J78   | Mimitin, mitochondrial OS=Mus musculus GN=Ndufa2 PE=2 SV=1 - [MIMIT_MOUSE]                                     | 28.57 | 1 | 4  | 4  | 9  | 0.96 | 0.97 | 1.04 | 1.01 | 1.04 | 0.98 | 1.00 | 1.03 | 1.00 | 0.90 | 0.96 | 0.78 | 0.90 | 19.62  | 8.25 |
| P28661-2 | Isoform 2 of Septin-4 OS=Mus musculus GN=Sept4 - [SEPT4_MOUSE]                                                 | 48.80 | 9 | 15 | 16 | 51 | 0.91 | 0.90 | 1.07 | 1.00 | 1.06 | 1.01 | 1.10 | 1.03 | 1.13 | 0.95 | 1.04 | 0.98 | 1.10 | 52.96  | 6.18 |
| Q8CHG7   | Rap guanine nucleotide exchange factor 2 OS=Mus musculus GN=Rapgef2 PE=1 SV=2 - [RPGF2_MOUSE]                  | 29.08 | 6 | 27 | 27 | 61 | 0.99 | 0.98 | 0.95 | 1.05 | 1.08 | 1.03 | 1.07 | 1.03 | 1.07 | 1.04 | 1.09 | 1.07 | 1.08 | 166.31 | 6.61 |
| Q6DFV5   | Probable helicase with zinc finger domain OS=Mus musculus GN=Helz PE=1 SV=2 - [HELZ_MOUSE]                     | 2.04  | 5 | 3  | 3  | 10 | 1.05 | 1.12 | 1.06 | 1.02 | 0.97 | 1.05 | 1.01 | 1.03 | 1.02 | 0.96 | 0.92 | 0.97 | 0.92 | 219.74 | 7.40 |
| B7ZC24   | Nuclear receptor coactivator 5 OS=Mus musculus GN=Ncoa5 PE=2 SV=1 - [B7ZC24_MOUSE]                             | 15.02 | 1 | 1  | 5  | 12 | 0.92 | 1.32 | 1.42 | 0.96 | 1.04 | 0.92 | 0.99 | 1.03 | 1.11 | 1.00 | 1.09 | 1.02 | 1.11 | 48.05  | 9.69 |
| F8WIE5   | E3 ubiquitin-protein ligase HECTD1 OS=Mus musculus GN=Hectd1 PE=2 SV=1 - [F8WIE5_MOUSE]                        | 3.68  | 2 | 6  | 6  | 11 | 1.00 | 1.19 | 1.20 | 1.07 | 1.13 | 0.94 | 1.01 | 1.03 | 0.89 | 0.98 | 0.99 | 1.04 | 0.96 | 289.05 | 5.36 |
| E9Q2A6   | Protein-tyrosine kinase 2-beta OS=Mus musculus GN=Ptk2b PE=2 SV=1 - [E9Q2A6_MOUSE]                             | 39.61 | 4 | 31 | 32 | 91 | 0.98 | 0.94 | 0.97 | 1.01 | 1.01 | 1.07 | 1.04 | 1.03 | 0.98 | 1.05 | 1.05 | 0.99 | 0.99 | 111.03 | 6.04 |
| Q8BLS7   | Ankyrin repeat domain-containing protein SOWAHA OS=Mus musculus GN=Sowaha PE=2 SV=2 - [SWAHA_MOUSE]            | 1.82  | 1 | 1  | 1  | 2  | 1.01 | 1.15 | 1.13 | 1.05 | 1.03 | 1.03 | 1.02 | 1.03 | 1.01 | 1.02 | 1.01 | 1.25 | 1.24 | 57.71  | 9.82 |
| Q923G2   | DNA-directed RNA polymerases I, II, and III subunit RPABC3 OS=Mus musculus GN=Polr2h PE=2 SV=3 - [RPAB3_MOUSE] | 26.67 | 1 | 3  | 3  | 5  | 1.10 | 1.26 | 1.04 | 0.99 | 0.87 | 1.00 | 0.91 | 1.03 | 0.93 | 1.00 | 0.84 | 1.00 | 0.91 | 17.13  | 4.68 |

|        |                                                                                                                                     |       |   |    |    |    |      |      |      |      |      |      |      |      |      |      |      |      |      |        |      |
|--------|-------------------------------------------------------------------------------------------------------------------------------------|-------|---|----|----|----|------|------|------|------|------|------|------|------|------|------|------|------|------|--------|------|
| Q99L13 | 3-hydroxyisobutyrate dehydrogenase, mitochondrial OS=Mus musculus GN=Hibadh PE=2 SV=1 - [3HIDH_MOUSE]                               | 46.57 | 1 | 11 | 11 | 34 | 0.90 | 1.06 | 1.04 | 0.99 | 1.01 | 1.01 | 1.12 | 1.03 | 1.13 | 1.01 | 1.12 | 1.03 | 1.06 | 35.42  | 8.13 |
| P01887 | Beta-2-microglobulin OS=Mus musculus GN=B2m PE=1 SV=2 - [B2MG_MOUSE]                                                                | 59.66 | 1 | 4  | 4  | 9  | 0.98 | 0.87 | 0.92 | 0.85 | 0.95 | 1.05 | 1.06 | 1.03 | 1.19 | 0.98 | 1.08 | 0.93 | 0.77 | 13.77  | 8.44 |
| E9PXJ0 | Neuronal tyrosine-phosphorylated phosphoinositide-3-kinase adapter 1 (Fragment) OS=Mus musculus GN=Nyap1 PE=2 SV=1 - [E9PXJ0_MOUSE] | 5.32  | 4 | 3  | 3  | 6  | 0.91 | 1.04 | 1.16 | 1.04 | 1.08 | 1.02 | 1.15 | 1.03 | 1.15 | 1.09 | 1.19 | 1.15 | 1.26 | 82.75  | 9.19 |
| Q91UZ1 | Phospholipase C beta 4 OS=Mus musculus GN=P1cb4 PE=2 SV=1 - [Q91UZ1_MOUSE]                                                          | 18.64 | 3 | 19 | 19 | 45 | 0.95 | 0.87 | 0.88 | 0.95 | 1.02 | 1.00 | 1.01 | 1.03 | 1.07 | 0.96 | 0.97 | 0.88 | 0.87 | 134.44 | 6.90 |
| D3YVZ8 | Zinc finger protein Pegasus (Fragment) OS=Mus musculus GN=Ikzf5 PE=2 SV=1 - [D3YVZ8_MOUSE]                                          | 45.00 | 4 | 1  | 1  | 1  | 1.02 | 0.68 | 0.67 | 0.89 | 0.88 | 1.15 | 1.12 | 1.03 | 1.01 | 0.89 | 0.87 | 0.80 | 0.79 | 2.41   | 4.61 |
| Q9DC88 | Mitochondrial import receptor subunit TOM20 homolog OS=Mus musculus GN=Tom20 PE=1 SV=1 - [TOM20_MOUSE]                              | 27.59 | 1 | 3  | 3  | 11 | 1.10 | 0.96 | 0.88 | 0.98 | 0.97 | 1.08 | 1.08 | 1.03 | 1.01 | 1.13 | 1.01 | 1.06 | 1.05 | 16.27  | 8.60 |
| Q5DU25 | IQ motif and SEC7 domain-containing protein 2 OS=Mus musculus GN=Iqsec2 PE=1 SV=3 - [IQEC2_MOUSE]                                   | 12.45 | 5 | 12 | 14 | 52 | 1.08 | 1.07 | 1.08 | 1.14 | 1.07 | 1.03 | 0.95 | 1.03 | 0.99 | 0.99 | 0.95 | 1.03 | 0.97 | 161.69 | 8.56 |
| Q3TXX3 | Isoform 2 of Protrudin OS=Mus musculus GN=Zfyve27 - [ZFY27_MOUSE]                                                                   | 2.94  | 2 | 1  | 1  | 2  | 0.94 | 1.08 | 1.15 | 0.97 | 1.03 | 0.93 | 0.98 | 1.03 | 1.09 | 1.03 | 1.10 | 1.13 | 1.21 | 45.38  | 5.35 |
| Q00899 | Transcriptional repressor protein YY1 OS=Mus musculus GN=Yy1 PE=1 SV=1 - [TYY1_MOUSE]                                               | 15.70 | 2 | 5  | 5  | 13 | 1.07 | 0.78 | 0.67 | 1.01 | 0.97 | 1.18 | 1.07 | 1.03 | 1.03 | 1.01 | 0.95 | 0.95 | 0.93 | 44.69  | 6.29 |
| Q80TN7 | Neuron navigator 3 OS=Mus musculus GN=Nav3 PE=1 SV=2 - [NAV3_MOUSE]                                                                 | 3.31  | 5 | 6  | 6  | 9  | 1.00 | 1.08 | 1.04 | 1.05 | 1.01 | 1.07 | 1.00 | 1.03 | 1.01 | 0.97 | 0.97 | 0.87 | 0.86 | 252.15 | 8.76 |
| O08576 | RUN domain-containing protein 3A OS=Mus musculus GN=Rundc3a PE=1 SV=1 - [RUN3A_MOUSE]                                               | 18.61 | 1 | 1  | 5  | 7  | 1.14 | 1.28 | 1.12 | 0.99 | 0.86 | 1.07 | 0.94 | 1.03 | 0.90 | 0.91 | 0.80 | 1.02 | 0.90 | 49.99  | 5.50 |

|        |                                                                                                                 |       |   |     |     |      |      |      |      |      |      |      |      |      |      |      |      |      |      |        |      |
|--------|-----------------------------------------------------------------------------------------------------------------|-------|---|-----|-----|------|------|------|------|------|------|------|------|------|------|------|------|------|------|--------|------|
| Q8K093 | Thyrotropin-releasing hormone-degrading ectoenzyme OS=Mus musculus GN=Trhde PE=2 SV=1 - [TRHDE_MOUSE]           | 1.56  | 1 | 1   | 1   | 1    | 1.03 | 0.61 | 0.60 | 0.99 | 0.96 | 0.95 | 0.92 | 1.03 | 1.00 | 1.11 | 1.08 | 1.19 | 1.16 | 117.38 | 7.06 |
| Q6QWF9 | Calcium/calmodulin-dependent protein kinase II inhibitor 1 OS=Mus musculus GN=Camk2n1 PE=1 SV=1 - [CK2N1_MOUSE] | 57.69 | 1 | 2   | 4   | 42   | 0.97 | 0.77 | 0.80 | 0.88 | 0.88 | 1.05 | 1.11 | 1.03 | 1.11 | 1.01 | 0.98 | 0.86 | 0.87 | 8.51   | 5.45 |
| P14873 | Microtubule-associated protein 1B OS=Mus musculus GN=Map1b PE=1 SV=2 - [MAP1B_MOUSE]                            | 62.99 | 1 | 126 | 127 | 1470 | 1.05 | 0.88 | 0.85 | 0.95 | 0.90 | 1.06 | 1.01 | 1.03 | 0.99 | 1.02 | 0.97 | 0.99 | 0.95 | 270.09 | 4.83 |
| Q8BZM0 | Isoform 2 of Kelch-like protein 12 OS=Mus musculus GN=Klh12 - [KLH12_MOUSE]                                     | 4.07  | 2 | 1   | 1   | 1    | 1.67 | 7.35 | 4.39 | 1.27 | 0.76 | 1.57 | 0.93 | 1.03 | 0.61 | 1.31 | 0.79 | 1.03 | 0.62 | 60.53  | 5.44 |
| O55091 | Protein IMPACT OS=Mus musculus GN=Impact PE=1 SV=2 - [IMPCT_MOUSE]                                              | 52.20 | 2 | 13  | 13  | 42   | 1.05 | 0.93 | 0.92 | 0.99 | 0.93 | 0.97 | 0.88 | 1.03 | 0.90 | 1.02 | 0.94 | 1.10 | 1.02 | 36.25  | 5.05 |
| B9EKR1 | Protein Ptpnz1 OS=Mus musculus GN=Ptpnz1 PE=2 SV=1 - [B9EKR1_MOUSE]                                             | 13.80 | 1 | 29  | 29  | 486  | 1.04 | 0.89 | 0.86 | 0.90 | 0.88 | 1.05 | 1.01 | 1.03 | 0.98 | 0.93 | 0.88 | 0.90 | 0.86 | 254.25 | 4.88 |
| Q9WV85 | Nucleoside diphosphate kinase 3 OS=Mus musculus GN=Nme3 PE=2 SV=3 - [NDK3_MOUSE]                                | 23.08 | 1 | 3   | 3   | 7    | 1.00 | 0.97 | 0.94 | 1.18 | 1.26 | 1.03 | 1.11 | 1.03 | 1.05 | 1.04 | 1.05 | 1.11 | 1.11 | 19.09  | 6.68 |
| Q8VI51 | VPS10 domain-containing receptor SorCS3 OS=Mus musculus GN=Sorc3 PE=1 SV=1 - [SORC3_MOUSE]                      | 11.40 | 1 | 10  | 10  | 17   | 1.11 | 1.04 | 0.94 | 1.01 | 0.96 | 0.99 | 0.90 | 1.03 | 1.07 | 1.04 | 1.03 | 0.92 | 0.95 | 135.90 | 6.49 |
| P14733 | Lamin-B1 OS=Mus musculus GN=Lmnb1 PE=1 SV=3 - [LMNB1_MOUSE]                                                     | 52.89 | 2 | 27  | 31  | 146  | 0.95 | 0.98 | 1.02 | 0.89 | 0.96 | 1.01 | 1.06 | 1.03 | 1.10 | 0.97 | 1.04 | 0.93 | 1.02 | 66.74  | 5.16 |
| Q8BGR8 | GSK3-beta interaction protein OS=Mus musculus GN=Gskip PE=2 SV=1 - [GSKIP_MOUSE]                                | 67.63 | 2 | 5   | 5   | 9    | 1.11 | 0.78 | 0.80 | 0.95 | 0.87 | 1.01 | 0.90 | 1.03 | 1.12 | 0.96 | 0.81 | 0.92 | 0.86 | 15.63  | 4.41 |
| Q62318 | Transcription intermediary factor 1-beta OS=Mus musculus GN=Trim28 PE=1 SV=3 - [TIF1B_MOUSE]                    | 34.17 | 2 | 16  | 16  | 57   | 0.97 | 1.04 | 1.06 | 0.98 | 0.99 | 1.02 | 1.10 | 1.03 | 1.09 | 1.05 | 1.04 | 1.05 | 1.09 | 88.79  | 5.77 |
| O35114 | Lysosome membrane protein 2 OS=Mus musculus GN=Scarb2 PE=1 SV=3 - [SCR2_MOUSE]                                  | 6.28  | 1 | 2   | 2   | 3    | 1.00 | 1.03 | 1.03 | 1.11 | 1.11 | 0.92 | 0.92 | 1.03 | 1.03 | 1.02 | 1.02 | 0.98 | 0.99 | 54.01  | 5.10 |

|          |                                                                                                                                           |       |   |    |    |      |      |      |      |      |      |      |      |      |      |      |      |      |      |        |      |
|----------|-------------------------------------------------------------------------------------------------------------------------------------------|-------|---|----|----|------|------|------|------|------|------|------|------|------|------|------|------|------|------|--------|------|
| Q8K3Z7   | Chromosome alignment-maintaining phosphoprotein 1<br>OS=Mus musculus<br>GN=Champ1 PE=1<br>SV=1 -<br>[CHAP1_MOUSE]                         | 20.82 | 1 | 13 | 13 | 21   | 0.97 | 0.85 | 0.90 | 0.87 | 0.89 | 1.07 | 1.11 | 1.03 | 1.11 | 0.98 | 1.03 | 1.00 | 1.01 | 87.51  | 7.85 |
| H7BWW4   | Disks large homolog 1<br>OS=Mus musculus<br>GN=Dlg1 PE=2 SV=1 -<br>[H7BWW4_MOUSE]                                                         | 40.48 | 7 | 21 | 28 | 91   | 0.95 | 0.89 | 0.98 | 0.97 | 1.05 | 1.03 | 1.07 | 1.03 | 1.06 | 0.96 | 1.00 | 0.92 | 0.97 | 96.83  | 5.90 |
| Q3TZU5   | Protein kinase inhibitor beta, cAMP dependent, testis specific, isoform CRA_c<br>OS=Mus musculus<br>GN=Pkip PE=4 SV=1 -<br>[Q3TZU5_MOUSE] | 64.10 | 4 | 5  | 5  | 9    | 1.18 | 0.91 | 0.72 | 1.06 | 0.78 | 1.29 | 0.98 | 1.03 | 0.79 | 1.13 | 0.97 | 1.28 | 1.10 | 8.33   | 5.15 |
| O88935   | Synapsin-1<br>OS=Mus musculus<br>GN=Syn1 PE=1 SV=2 -<br>[SYN1_MOUSE]                                                                      | 83.71 | 3 | 42 | 44 | 1054 | 0.97 | 0.94 | 0.95 | 0.98 | 1.00 | 1.03 | 1.05 | 1.03 | 1.04 | 0.98 | 1.01 | 0.99 | 1.02 | 74.05  | 9.80 |
| Q9R1X5   | Multidrug resistance-associated protein 5<br>OS=Mus musculus<br>GN=Abcc5 PE=1<br>SV=2 -<br>[MRP5_MOUSE]                                   | 0.84  | 1 | 1  | 1  | 1    | 0.99 | 0.86 | 0.86 | 0.86 | 0.87 | 1.21 | 1.21 | 1.03 | 1.04 | 0.88 | 0.89 | 1.06 | 1.07 | 161.02 | 8.60 |
| P63250   | G protein-activated inward rectifier potassium channel 1<br>OS=Mus musculus<br>GN=Kcnj3 PE=1<br>SV=1 -<br>[IRK3_MOUSE]                    | 8.58  | 1 | 4  | 4  | 6    | 0.86 | 1.06 | 1.14 | 0.99 | 1.15 | 0.90 | 0.93 | 1.03 | 1.13 | 0.88 | 1.08 | 0.82 | 0.89 | 56.54  | 8.37 |
| P60766-1 | Isoform 1 of Cell division control protein 42 homolog<br>OS=Mus musculus<br>GN=Cdc42 -<br>[CDC42_MOUSE]                                   | 49.74 | 8 | 3  | 10 | 51   | 1.10 | 1.05 | 0.91 | 1.22 | 1.23 | 0.90 | 0.87 | 1.03 | 0.93 | 0.92 | 0.94 | 1.11 | 0.95 | 21.30  | 6.04 |
| O54962   | Barrier-to-autointegration factor<br>OS=Mus musculus<br>GN=Banf1 PE=1<br>SV=1 -<br>[BAF_MOUSE]                                            | 49.44 | 1 | 3  | 3  | 24   | 0.96 | 0.81 | 0.85 | 0.89 | 0.89 | 1.04 | 1.02 | 1.03 | 1.12 | 1.02 | 1.04 | 0.92 | 1.06 | 10.10  | 6.09 |
| O70194   | Eukaryotic translation initiation factor 3 subunit D<br>OS=Mus musculus<br>GN=Elf3d PE=1 SV=2 -<br>[EIF3D_MOUSE]                          | 17.70 | 1 | 8  | 8  | 17   | 1.01 | 0.90 | 0.95 | 1.00 | 1.01 | 1.11 | 1.08 | 1.03 | 1.08 | 1.00 | 0.97 | 0.96 | 1.03 | 63.95  | 6.05 |
| Q3U143   | BRISC and BRCA1-A complex member 1<br>OS=Mus musculus<br>GN=Babam1 PE=2<br>SV=1 -<br>[BABA1_MOUSE]                                        | 37.84 | 1 | 7  | 7  | 27   | 1.01 | 0.86 | 0.93 | 0.81 | 0.86 | 0.96 | 0.97 | 1.03 | 1.03 | 0.88 | 0.89 | 0.87 | 0.95 | 36.77  | 4.55 |
| D3YWX2   | YLP motif-containing protein 1<br>OS=Mus musculus<br>GN=Y1pm1 PE=2 SV=2 -<br>[D3YWX2_MOUSE]                                               | 23.33 | 8 | 36 | 37 | 101  | 0.98 | 0.95 | 0.99 | 0.95 | 0.97 | 1.03 | 1.08 | 1.03 | 1.05 | 0.95 | 0.96 | 0.92 | 0.96 | 240.90 | 6.68 |

|          |                                                                                                                           |       |   |    |    |     |      |      |      |      |      |      |      |      |      |      |      |      |      |        |      |
|----------|---------------------------------------------------------------------------------------------------------------------------|-------|---|----|----|-----|------|------|------|------|------|------|------|------|------|------|------|------|------|--------|------|
| B0R091   | Protein Gm20056<br>OS=Mus musculus<br>GN=Chp1 PE=2 SV=1<br>-[B0R091_MOUSE]                                                | 69.11 | 3 | 12 | 12 | 25  | 0.93 | 0.92 | 0.96 | 1.00 | 0.91 | 1.07 | 1.03 | 1.03 | 1.03 | 1.03 | 0.98 | 0.97 | 0.99 | 21.98  | 4.93 |
| Q9QXN0   | Isoform 4 of Protein<br>Shroom3 OS=Mus<br>musculus<br>GN=Shroom3 -<br>[SHRM3_MOUSE]                                       | 1.83  | 9 | 1  | 3  | 9   | 0.93 | 1.25 | 1.35 | 1.08 | 1.16 | 0.99 | 1.07 | 1.03 | 1.11 | 1.03 | 1.12 | 0.95 | 1.02 | 195.32 | 7.90 |
| P09813   | Apolipoprotein A-II<br>OS=Mus musculus<br>GN=Apoa2 PE=1<br>SV=2 -<br>[APOA2_MOUSE]                                        | 8.82  | 1 | 1  | 1  | 2   | 0.62 | 0.95 | 1.54 | 0.57 | 0.93 | 0.75 | 1.21 | 1.03 | 1.67 | 1.73 | 2.81 | 1.05 | 1.71 | 11.30  | 7.18 |
| Q9JJA7-3 | Isoform 3 of Cyclin-L2<br>OS=Mus musculus<br>GN=Ccnl2 -<br>[CCNL2_MOUSE]                                                  | 6.88  | 3 | 1  | 1  | 1   | 1.02 | 1.14 | 1.11 | 0.84 | 0.82 | 1.24 | 1.20 | 1.03 | 1.01 | 0.99 | 0.97 | 0.88 | 0.86 | 23.99  | 9.01 |
| A2A6U3   | Septin-9 OS=Mus<br>musculus GN=Sept9<br>PE=2 SV=1 -<br>[A2A6U3_MOUSE]                                                     | 43.89 | 6 | 20 | 21 | 54  | 0.90 | 1.03 | 1.13 | 0.98 | 1.03 | 1.02 | 1.02 | 1.03 | 1.12 | 0.94 | 1.03 | 0.91 | 0.99 | 63.73  | 8.32 |
| Q9D1D4   | Transmembrane emp24<br>domain-containing<br>protein 10 OS=Mus<br>musculus GN=Tmed10<br>PE=2 SV=1 -<br>[TMEDA_MOUSE]       | 31.05 | 2 | 6  | 6  | 18  | 0.95 | 0.88 | 0.92 | 0.98 | 1.02 | 1.12 | 1.04 | 1.03 | 1.09 | 0.94 | 0.97 | 0.95 | 0.94 | 24.89  | 6.70 |
| D3YWG7   | DCN1-like protein 3<br>(Fragment) OS=Mus<br>musculus<br>GN=Deun1d3 PE=2<br>SV=1 -<br>[D3YWG7_MOUSE]                       | 18.79 | 2 | 2  | 2  | 7   | 1.04 | 1.02 | 0.92 | 0.94 | 0.93 | 0.96 | 0.89 | 1.03 | 0.93 | 0.93 | 0.87 | 0.98 | 0.91 | 18.20  | 6.55 |
| P58929   | Glucocorticoid<br>modulatory element-<br>binding protein 2<br>OS=Mus musculus<br>GN=Gmeb2 PE=2<br>SV=2 -<br>[GMEB2_MOUSE] | 1.70  | 1 | 1  | 1  | 1   | 0.94 | 1.32 | 1.40 | 0.85 | 0.91 | 0.93 | 0.99 | 1.03 | 1.10 | 1.04 | 1.11 | 1.09 | 1.17 | 56.60  | 5.31 |
| Q9CQ17   | U2 small nuclear<br>ribonucleoprotein B*<br>OS=Mus musculus<br>GN=Snrbp2 PE=2<br>SV=1 -<br>[RU2B_MOUSE]                   | 16.00 | 2 | 2  | 3  | 9   | 1.04 | 1.05 | 1.18 | 0.80 | 0.89 | 0.99 | 0.95 | 1.03 | 0.99 | 0.99 | 0.86 | 0.97 | 0.94 | 25.31  | 9.72 |
| Q9R1K9   | Centrin-2 OS=Mus<br>musculus GN=Ctn2<br>PE=1 SV=1 -<br>[CTN2_MOUSE]                                                       | 68.02 | 3 | 11 | 11 | 44  | 1.12 | 0.93 | 0.86 | 0.94 | 0.79 | 1.14 | 0.97 | 1.03 | 0.91 | 1.15 | 0.96 | 0.96 | 0.94 | 19.78  | 5.00 |
| Q9CPQ9   | Fructose-bisphosphate<br>aldolase OS=Mus<br>musculus<br>GN=Aldoat1 PE=2<br>SV=1 -<br>[Q9CPQ9_MOUSE]                       | 52.20 | 3 | 1  | 18 | 397 | 1.23 | 0.61 | 0.49 | 1.44 | 1.17 | 0.97 | 0.78 | 1.03 | 0.84 | 1.21 | 0.98 | 1.09 | 0.88 | 39.26  | 7.37 |
| O08997   | Copper transport<br>protein ATOX1<br>OS=Mus musculus<br>GN=Atox1 PE=2<br>SV=1 -<br>[ATOX1_MOUSE]                          | 58.82 | 1 | 4  | 4  | 97  | 1.11 | 1.01 | 0.85 | 0.96 | 0.89 | 1.16 | 1.03 | 1.03 | 0.96 | 0.98 | 0.95 | 0.95 | 0.89 | 7.33   | 6.51 |

|        |                                                                                                                                  |       |   |    |    |      |      |      |      |      |      |      |      |      |      |      |      |      |      |        |      |
|--------|----------------------------------------------------------------------------------------------------------------------------------|-------|---|----|----|------|------|------|------|------|------|------|------|------|------|------|------|------|------|--------|------|
| P24369 | Peptidyl-prolyl cis-trans isomerase B<br>OS=Mus musculus<br>GN=Ppib PE=2 SV=2 -<br>[PPIB_MOUSE]                                  | 49.54 | 2 | 10 | 11 | 43   | 1.00 | 0.82 | 0.81 | 0.98 | 0.96 | 1.13 | 1.16 | 1.03 | 1.05 | 0.99 | 1.03 | 1.03 | 1.03 | 23.70  | 9.55 |
| P10639 | Thioredoxin OS=Mus musculus<br>GN=Txn PE=1 SV=3 -<br>[THIO_MOUSE]                                                                | 65.71 | 1 | 7  | 7  | 82   | 1.04 | 0.84 | 0.79 | 0.96 | 0.91 | 1.07 | 1.03 | 1.03 | 1.01 | 0.93 | 0.91 | 0.95 | 0.91 | 11.67  | 4.92 |
| Q6NZR5 | Protein Skiv2l<br>OS=Mus musculus<br>GN=Skiv2l PE=2<br>SV=1 -<br>[Q6NZR5_MOUSE]                                                  | 3.62  | 1 | 3  | 3  | 10   | 0.95 | 1.14 | 0.99 | 0.98 | 0.99 | 1.00 | 1.05 | 1.03 | 0.96 | 1.04 | 1.09 | 1.05 | 1.10 | 137.44 | 6.28 |
| Q9D902 | General transcription factor IIE subunit 2<br>OS=Mus musculus<br>GN=Grt2e2 PE=2<br>SV=2 -<br>[T2EB_MOUSE]                        | 9.59  | 1 | 2  | 2  | 5    | 0.95 | 0.78 | 0.82 | 1.01 | 1.07 | 1.06 | 1.11 | 1.03 | 1.04 | 1.19 | 1.18 | 0.96 | 0.97 | 33.03  | 9.64 |
| Q9CZY3 | Ubiquitin-conjugating enzyme E2 variant 1<br>OS=Mus musculus<br>GN=Ube2v1 PE=1<br>SV=1 -<br>[UB2V1_MOUSE]                        | 44.90 | 7 | 1  | 5  | 72   | 0.97 | 1.20 | 1.23 | 1.05 | 1.06 | 0.98 | 0.89 | 1.03 | 1.04 | 1.00 | 0.99 | 1.03 | 1.06 | 16.34  | 7.96 |
| Q9Z2Q6 | Septin-5 OS=Mus musculus<br>GN=Sept5 PE=1 SV=2 -<br>[SEPT5_MOUSE]                                                                | 44.99 | 1 | 15 | 15 | 146  | 1.00 | 0.90 | 0.87 | 1.04 | 1.04 | 1.08 | 1.06 | 1.03 | 1.03 | 1.00 | 0.97 | 1.05 | 1.05 | 42.72  | 6.67 |
| Q9CXX9 | CUE domain-containing protein 2<br>OS=Mus musculus<br>GN=Cued2 PE=2<br>SV=1 -<br>[CUED2_MOUSE]                                   | 23.24 | 1 | 6  | 6  | 29   | 1.03 | 0.87 | 0.79 | 0.96 | 0.89 | 1.17 | 1.11 | 1.03 | 1.00 | 0.99 | 0.93 | 0.91 | 0.90 | 31.83  | 4.98 |
| Q9WV38 | Solute carrier family 2, facilitated glucose transporter member 5<br>OS=Mus musculus<br>GN=Slc2a5 PE=2<br>SV=2 -<br>[GTR5_MOUSE] | 2.99  | 1 | 1  | 1  | 2    | 1.12 | 1.02 | 0.91 | 0.97 | 0.86 | 1.03 | 0.91 | 1.03 | 0.92 | 1.10 | 0.98 | 1.01 | 0.90 | 55.37  | 5.31 |
| Q9D114 | Guanosine-3',5'-bis(diphosphate) 3'-pyrophosphohydrolase<br>MESH1 OS=Mus musculus<br>GN=Hdde3 PE=2 SV=1 -<br>[MESH1_MOUSE]       | 7.82  | 1 | 1  | 1  | 2    | 0.87 | 0.77 | 0.88 | 0.87 | 1.00 | 0.97 | 1.12 | 1.03 | 1.19 | 0.89 | 1.03 | 0.80 | 0.92 | 20.25  | 5.96 |
| P99024 | Tubulin beta-5 chain<br>OS=Mus musculus<br>GN=Tubb5 PE=1<br>SV=1 -<br>[TBB5_MOUSE]                                               | 75.23 | 2 | 4  | 29 | 1915 | 1.01 | 1.06 | 1.03 | 1.03 | 1.03 | 1.05 | 1.04 | 1.03 | 1.02 | 1.07 | 1.08 | 1.11 | 1.10 | 49.64  | 4.89 |
| Q6PAM0 | 5'-AMP-activated protein kinase subunit beta-2 OS=Mus musculus<br>GN=Prkab2 PE=1 SV=1 -<br>[AAKB2_MOUSE]                         | 19.19 | 3 | 3  | 3  | 11   | 0.89 | 1.02 | 1.07 | 1.06 | 1.07 | 1.05 | 1.14 | 1.03 | 1.11 | 0.93 | 1.02 | 0.90 | 0.99 | 30.19  | 6.46 |

|          |                                                                                                                          |       |   |    |    |     |      |      |      |      |      |      |      |      |      |      |      |      |      |        |      |
|----------|--------------------------------------------------------------------------------------------------------------------------|-------|---|----|----|-----|------|------|------|------|------|------|------|------|------|------|------|------|------|--------|------|
| Q9D7A8   | Armadillo repeat-containing protein 1<br>OS=Mus musculus<br>GN=Armc1 PE=2<br>SV=1 -<br>[ARMC1_MOUSE]                     | 22.70 | 1 | 4  | 4  | 10  | 0.96 | 1.30 | 1.31 | 0.90 | 0.97 | 0.97 | 0.94 | 1.03 | 1.13 | 0.98 | 0.87 | 1.04 | 1.13 | 31.23  | 5.57 |
| G3X8R2   | Cytoplasmic FMR1-interacting protein 1 (Fragment)<br>OS=Mus musculus<br>GN=Sra1 PE=4<br>SV=1 -<br>[G3X8R2_MOUSE]         | 39.01 | 2 | 5  | 5  | 13  | 0.92 | 0.83 | 0.85 | 0.91 | 0.97 | 1.03 | 1.10 | 1.03 | 1.04 | 0.94 | 0.87 | 0.94 | 1.00 | 24.59  | 6.02 |
| A2AKF0   | N-terminal EF-hand calcium-binding protein 3 (Fragment)<br>OS=Mus musculus<br>GN=Necab3 PE=2<br>SV=1 -<br>[A2AKF0_MOUSE] | 16.67 | 3 | 1  | 1  | 3   | 0.85 | 0.90 | 1.06 | 0.72 | 0.85 | 0.99 | 1.16 | 1.03 | 1.22 | 0.97 | 1.15 | 0.93 | 1.10 | 18.44  | 7.77 |
| Q9ZIK5   | E3 ubiquitin-protein ligase ARIH1<br>OS=Mus musculus<br>GN=Arih1 PE=2<br>SV=3 -<br>[ARI1_MOUSE]                          | 12.61 | 3 | 6  | 6  | 9   | 1.02 | 1.11 | 1.08 | 0.98 | 1.00 | 0.90 | 0.89 | 1.03 | 1.00 | 1.02 | 1.04 | 0.92 | 1.02 | 63.97  | 5.08 |
| Q8R0P4   | Mth938 domain-containing protein<br>OS=Mus musculus<br>GN=Aamdc PE=1<br>SV=1 -<br>[AAMD_C_MOUSE]                         | 40.16 | 9 | 5  | 5  | 15  | 1.02 | 1.05 | 1.02 | 0.96 | 0.94 | 1.09 | 1.06 | 1.03 | 1.05 | 1.04 | 1.00 | 1.01 | 1.00 | 13.24  | 7.99 |
| Q9QX96   | Sal-like protein 2<br>OS=Mus musculus<br>GN=Sal2 PE=2<br>SV=2 -<br>[SALL2_MOUSE]                                         | 1.39  | 2 | 1  | 1  | 1   | 1.18 | 1.25 | 1.07 | 0.93 | 0.79 | 1.29 | 1.09 | 1.03 | 0.88 | 1.04 | 0.89 | 1.08 | 0.92 | 104.88 | 6.28 |
| G3X972   | Protein Sec24c<br>OS=Mus musculus<br>GN=Sec24c PE=4<br>SV=1 -<br>[G3X972_MOUSE]                                          | 12.23 | 1 | 10 | 10 | 19  | 1.06 | 1.23 | 1.20 | 1.17 | 1.17 | 1.03 | 0.98 | 1.03 | 0.94 | 0.96 | 0.92 | 1.03 | 0.95 | 118.51 | 6.84 |
| A2AF31   | Protein Tmsb15b2<br>OS=Mus musculus<br>GN=Tmsb15b2 PE=2<br>SV=1 -<br>[A2AF31_MOUSE]                                      | 48.89 | 3 | 2  | 2  | 189 | 1.05 | 0.73 | 0.68 | 0.88 | 0.93 | 1.19 | 1.07 | 1.03 | 1.03 | 1.01 | 0.96 | 0.99 | 0.90 | 5.24   | 6.00 |
| Q9QYK9   | Calcium/calmodulin-dependent protein kinase type 1B<br>OS=Mus musculus<br>GN=Pck PE=2<br>SV=1 -<br>[KCC1B_MOUSE]         | 7.58  | 2 | 2  | 2  | 6   | 1.14 | 1.27 | 0.92 | 1.05 | 0.92 | 1.09 | 0.94 | 1.03 | 0.79 | 1.26 | 0.99 | 1.24 | 1.06 | 38.49  | 6.47 |
| Q91ZS8-5 | Isoform 5 of Double-stranded RNA-specific editase 1<br>OS=Mus musculus<br>GN=Adarb1 -<br>[RED1_MOUSE]                    | 1.62  | 5 | 1  | 1  | 1   | 1.08 | 1.33 | 1.23 | 1.08 | 1.00 | 1.16 | 1.07 | 1.03 | 0.96 | 1.09 | 1.01 | 1.44 | 1.34 | 74.12  | 9.35 |
| P70208   | Plexin-A3<br>OS=Mus musculus<br>GN=Pkn3 PE=1<br>SV=2 -<br>[PLXA3_MOUSE]                                                  | 4.11  | 2 | 1  | 7  | 11  | 0.95 | 1.05 | 1.10 | 0.95 | 1.00 | 1.11 | 1.16 | 1.03 | 1.08 | 1.09 | 1.15 | 1.13 | 1.19 | 207.83 | 7.09 |
| Q9WTR6   | Cystine/glutamate transporter<br>OS=Mus musculus<br>GN=Slc7a11 PE=1<br>SV=1 -<br>[XCT_MOUSE]                             | 7.77  | 1 | 3  | 3  | 6   | 1.19 | 1.06 | 0.77 | 1.14 | 0.93 | 1.00 | 0.75 | 1.03 | 0.90 | 1.17 | 1.02 | 1.32 | 0.90 | 55.42  | 9.23 |

|          |                                                                                                                                     |       |   |    |    |     |      |      |      |      |      |      |      |      |      |      |      |      |      |        |      |
|----------|-------------------------------------------------------------------------------------------------------------------------------------|-------|---|----|----|-----|------|------|------|------|------|------|------|------|------|------|------|------|------|--------|------|
| Q9EPL2   | Calsyntenin-1<br>OS=Mus musculus<br>GN=Clstn1 PE=1<br>SV=1 -<br>[CSTN1_MOUSE]                                                       | 25.54 | 2 | 18 | 18 | 46  | 0.99 | 0.80 | 0.83 | 0.95 | 0.98 | 1.03 | 1.02 | 1.03 | 1.08 | 0.93 | 0.94 | 0.83 | 0.88 | 108.83 | 4.92 |
| Q8BGC0   | HIV Tat-specific factor<br>1 homolog OS=Mus<br>musculus GN=Htatsf1<br>PE=1 SV=1 -<br>[HTSF1_MOUSE]                                  | 30.12 | 2 | 19 | 19 | 65  | 1.04 | 1.04 | 1.05 | 0.92 | 0.89 | 1.06 | 1.02 | 1.03 | 1.05 | 0.89 | 0.91 | 0.94 | 0.90 | 86.19  | 4.40 |
| Q9R062   | Glycogenin-1 OS=Mus<br>musculus GN=Gyg1<br>PE=2 SV=3 -<br>[GLYG_MOUSE]                                                              | 26.43 | 3 | 5  | 5  | 8   | 1.10 | 1.15 | 0.94 | 1.14 | 0.99 | 1.01 | 0.90 | 1.03 | 0.90 | 1.01 | 0.87 | 0.99 | 0.87 | 37.38  | 5.29 |
| Q9DCS9   | NADH dehydrogenase<br>[ubiquinone] 1 beta<br>subcomplex subunit 10<br>OS=Mus musculus<br>GN=Ndufb10 PE=1<br>SV=3 -<br>[NDUBA_MOUSE] | 53.98 | 2 | 10 | 10 | 54  | 1.07 | 0.87 | 0.85 | 0.97 | 0.89 | 0.98 | 0.93 | 1.03 | 1.00 | 0.93 | 0.84 | 0.98 | 0.95 | 21.01  | 8.03 |
| Q9D1F4   | Proline-rich AKT1<br>substrate 1 OS=Mus<br>musculus GN=Akt1s1<br>PE=1 SV=1 -<br>[AKTS1_MOUSE]                                       | 36.58 | 6 | 2  | 5  | 30  | 1.03 | 0.78 | 0.76 | 0.92 | 0.91 | 1.02 | 1.02 | 1.03 | 1.00 | 0.96 | 0.94 | 0.84 | 0.99 | 27.47  | 4.72 |
| Q3UMF0   | Isoform 3 of Cordon-<br>bleu protein-like 1<br>OS=Mus musculus<br>GN=Cobl1 -<br>[COBL1_MOUSE]                                       | 13.48 | 9 | 11 | 11 | 25  | 1.00 | 0.99 | 1.01 | 0.88 | 0.93 | 1.00 | 1.01 | 1.04 | 1.02 | 0.97 | 0.94 | 0.96 | 0.98 | 129.37 | 7.88 |
| P53996-2 | Isoform 2 of Cellular<br>nucleic acid-binding<br>protein OS=Mus<br>musculus GN=Crbp -<br>[CNBP_MOUSE]                               | 37.06 | 3 | 1  | 5  | 42  | 0.99 | 1.05 | 1.04 | 1.02 | 1.00 | 1.12 | 1.05 | 1.04 | 0.99 | 1.06 | 1.02 | 0.96 | 0.92 | 18.73  | 7.71 |
| B8QI34   | Liprin-alpha 2<br>OS=Mus musculus<br>GN=Ppfia2 PE=2<br>SV=1 -<br>[B8QI34_MOUSE]                                                     | 23.63 | 2 | 16 | 23 | 55  | 1.10 | 1.02 | 0.98 | 0.94 | 0.90 | 1.07 | 0.99 | 1.04 | 0.97 | 1.03 | 0.96 | 1.13 | 1.04 | 143.24 | 6.11 |
| F6R8U9   | Sulfatase-modifying<br>factor 2 (Fragment)<br>OS=Mus musculus<br>GN=Sumf2 PE=4<br>SV=1 -<br>[F6R8U9_MOUSE]                          | 12.39 | 2 | 2  | 2  | 6   | 1.10 | 0.94 | 0.96 | 0.92 | 0.87 | 1.05 | 0.83 | 1.04 | 0.88 | 1.00 | 0.88 | 1.07 | 1.07 | 25.63  | 7.44 |
| B2RXS4   | Plexin-B2 OS=Mus<br>musculus GN=Plxb2<br>PE=1 SV=1 -<br>[PLXB2_MOUSE]                                                               | 9.17  | 1 | 11 | 11 | 18  | 0.99 | 1.05 | 1.09 | 0.98 | 0.94 | 0.93 | 0.91 | 1.04 | 1.01 | 0.95 | 0.92 | 1.06 | 1.03 | 206.10 | 5.87 |
| Q99LR1   | Monoacylglycerol<br>lipase ABHD12<br>OS=Mus musculus<br>GN=Abhd12 PE=1<br>SV=2 -<br>[ABD12_MOUSE]                                   | 16.58 | 4 | 5  | 5  | 14  | 1.03 | 1.11 | 1.05 | 1.10 | 1.14 | 0.92 | 0.89 | 1.04 | 1.01 | 1.03 | 1.00 | 0.96 | 0.95 | 45.24  | 8.72 |
| Q9D9I4   | TBC1 domain family<br>member 20 OS=Mus<br>musculus<br>GN=Tbc1d20 PE=2<br>SV=1 -<br>[TBC20_MOUSE]                                    | 6.47  | 1 | 2  | 2  | 4   | 0.95 | 1.11 | 1.16 | 1.16 | 1.22 | 1.03 | 1.08 | 1.04 | 1.08 | 1.19 | 1.25 | 1.04 | 1.09 | 45.80  | 6.96 |
| O70318   | Band 4.1-like protein 2<br>OS=Mus musculus<br>GN=Epb41l2 PE=1<br>SV=2 -<br>[E41L2_MOUSE]                                            | 36.94 | 1 | 28 | 32 | 122 | 0.99 | 0.98 | 0.95 | 0.97 | 0.98 | 1.05 | 1.01 | 1.04 | 0.97 | 1.03 | 1.02 | 0.98 | 0.98 | 109.87 | 5.43 |



|          |                                                                                                                                                            |       |   |    |    |     |      |      |      |      |      |      |      |      |      |      |      |      |      |        |      |
|----------|------------------------------------------------------------------------------------------------------------------------------------------------------------|-------|---|----|----|-----|------|------|------|------|------|------|------|------|------|------|------|------|------|--------|------|
| G3UXN4   | KN motif and ankyrin repeat domain-containing protein 3<br>OS=Mus musculus<br>GN=Kank3 PE=2<br>SV=1 -<br>[G3UXN4_MOUSE]                                    | 4.81  | 2 | 2  | 2  | 4   | 0.95 | 1.03 | 1.08 | 0.96 | 1.01 | 1.09 | 1.14 | 1.04 | 1.09 | 1.20 | 1.26 | 1.05 | 1.11 | 64.34  | 4.84 |
| E9PXX7   | Thioredoxin domain-containing protein 5<br>OS=Mus musculus<br>GN=Txndc5 PE=2<br>SV=1 -<br>[E9PXX7_MOUSE]                                                   | 57.27 | 2 | 15 | 15 | 61  | 1.08 | 0.90 | 0.91 | 0.92 | 0.89 | 1.03 | 0.97 | 1.04 | 0.95 | 0.96 | 0.90 | 0.98 | 0.91 | 38.51  | 5.39 |
| P63054   | Purkinje cell protein 4<br>OS=Mus musculus<br>GN=Pcp4 PE=2 SV=2 -<br>[PCP4_MOUSE]                                                                          | 75.81 | 2 | 7  | 7  | 383 | 0.91 | 0.82 | 0.90 | 0.86 | 0.94 | 1.08 | 1.18 | 1.04 | 1.12 | 1.00 | 1.08 | 0.95 | 1.06 | 6.80   | 6.71 |
| Q61548-3 | Isoform 3 of Clathrin coat assembly protein AP180<br>OS=Mus musculus<br>GN=Snap91 -<br>[AP180_MOUSE]                                                       | 32.49 | 8 | 22 | 24 | 227 | 1.01 | 0.92 | 0.90 | 1.03 | 1.00 | 1.02 | 0.98 | 1.04 | 1.03 | 1.05 | 1.04 | 1.09 | 1.01 | 88.77  | 4.91 |
| Q99JB2   | Stomatin-like protein 2, mitochondrial<br>OS=Mus musculus<br>GN=Stoml2<br>PE=1 SV=1 -<br>[STML2_MOUSE]                                                     | 30.03 | 4 | 8  | 8  | 16  | 1.00 | 1.17 | 1.27 | 0.97 | 0.96 | 1.12 | 1.16 | 1.04 | 1.05 | 1.11 | 1.15 | 1.00 | 0.99 | 38.36  | 8.87 |
| G5E8G3   | MCG9827<br>OS=Mus musculus<br>GN=Opcnl<br>PE=4 SV=1 -<br>[G5E8G3_MOUSE]                                                                                    | 54.20 | 1 | 1  | 18 | 218 | 1.05 | 0.99 | 0.95 | 1.03 | 0.97 | 1.11 | 0.98 | 1.04 | 0.95 | 0.94 | 0.96 | 1.03 | 0.91 | 37.99  | 6.87 |
| D3Z0L4   | Coiled-coil-helix-coiled-coil-helix domain-containing protein 3, mitochondrial (Fragment)<br>OS=Mus musculus<br>GN=Chchd3<br>PE=2 SV=1 -<br>[D3Z0L4_MOUSE] | 43.75 | 2 | 1  | 11 | 117 | 0.82 | 0.75 | 0.84 | 0.83 | 0.98 | 1.05 | 1.26 | 1.04 | 1.30 | 0.92 | 1.11 | 0.87 | 1.02 | 22.44  | 6.42 |
| F6SPK0   | Ubiquitin-conjugating enzyme E2 J1 (Fragment)<br>OS=Mus musculus<br>GN=Ube2j1<br>PE=4 SV=1 -<br>[F6SPK0_MOUSE]                                             | 7.63  | 1 | 1  | 1  | 2   | 1.13 | 1.18 | 1.05 | 1.07 | 0.95 | 1.09 | 0.97 | 1.04 | 0.92 | 0.95 | 0.84 | 1.11 | 0.99 | 28.90  | 7.25 |
| Q8CF89   | TGF-beta-activated kinase 1 and MAP3K7-binding protein 1<br>OS=Mus musculus<br>GN=Tab1 PE=1 SV=2 -<br>[TAB1_MOUSE]                                         | 1.79  | 1 | 1  | 1  | 2   | 0.98 | 1.02 | 1.03 | 1.09 | 1.11 | 0.99 | 1.00 | 1.04 | 1.05 | 0.96 | 0.98 | 0.99 | 1.01 | 54.58  | 5.52 |
| Q5SV85-2 | Isoform 2 of Synergina gamma<br>OS=Mus musculus<br>GN=Synrg -<br>[SYNRG_MOUSE]                                                                             | 32.43 | 3 | 25 | 26 | 79  | 1.08 | 0.94 | 0.85 | 0.97 | 0.92 | 1.08 | 1.03 | 1.04 | 0.99 | 1.05 | 0.99 | 1.06 | 0.96 | 122.01 | 5.00 |

|          |                                                                                                               |       |    |    |    |     |      |      |      |      |      |      |      |      |      |      |      |      |      |        |      |
|----------|---------------------------------------------------------------------------------------------------------------|-------|----|----|----|-----|------|------|------|------|------|------|------|------|------|------|------|------|------|--------|------|
| D3Z396   | Neurotrimin OS=Mus musculus GN=Ntm PE=2 SV=1 - [D3Z396_MOUSE]                                                 | 45.57 | 5  | 10 | 16 | 485 | 0.99 | 1.01 | 1.00 | 1.03 | 1.03 | 1.04 | 1.04 | 1.04 | 1.04 | 0.96 | 0.95 | 0.92 | 0.93 | 34.93  | 6.96 |
| Q71M36   | Chondroitin sulfate proteoglycan 5 OS=Mus musculus GN=Cspg5 PE=1 SV=2 - [CSPG5_MOUSE]                         | 19.43 | 7  | 9  | 9  | 64  | 0.93 | 1.08 | 1.13 | 1.00 | 1.07 | 1.08 | 1.13 | 1.04 | 1.13 | 1.00 | 1.08 | 0.96 | 1.01 | 60.37  | 4.54 |
| Q5NBX1   | Isoform 2 of Protein cordon-bleu OS=Mus musculus GN=Cobl - [COBL_MOUSE]                                       | 9.80  | 11 | 9  | 9  | 25  | 0.98 | 1.07 | 1.07 | 0.95 | 1.01 | 0.99 | 1.02 | 1.04 | 1.05 | 0.95 | 1.02 | 0.89 | 0.96 | 135.44 | 8.21 |
| Q9WV03   | Protein FAM50A OS=Mus musculus GN=Fam50a PE=2 SV=1 - [FA50A_MOUSE]                                            | 14.45 | 2  | 4  | 4  | 7   | 0.99 | 0.75 | 0.76 | 0.94 | 0.95 | 1.02 | 1.01 | 1.04 | 1.05 | 0.89 | 0.90 | 0.90 | 0.88 | 40.23  | 6.83 |
| Q9WVC2   | Isoform 2 of Ly-6/neurotoxin-like protein 1 OS=Mus musculus GN=Lynx1 - [LYNX1_MOUSE]                          | 24.14 | 2  | 2  | 2  | 2   | 1.05 | 1.24 | 1.18 | 1.25 | 1.19 | 1.18 | 1.12 | 1.04 | 0.98 | 1.11 | 1.06 | 1.29 | 1.24 | 12.83  | 8.19 |
| O70252   | Heme oxygenase 2 OS=Mus musculus GN=Hmx2 PE=2 SV=1 - [HMOX2_MOUSE]                                            | 43.49 | 4  | 9  | 9  | 20  | 1.06 | 0.94 | 0.93 | 1.05 | 0.97 | 1.02 | 0.91 | 1.04 | 0.93 | 0.97 | 0.90 | 1.00 | 0.88 | 35.72  | 5.87 |
| Q9JF0    | Nucleosome assembly protein 1-like 5 OS=Mus musculus GN=Nap115 PE=2 SV=1 - [NP115_MOUSE]                      | 47.44 | 1  | 5  | 5  | 22  | 1.53 | 0.69 | 0.48 | 0.98 | 0.67 | 1.07 | 0.75 | 1.04 | 0.79 | 1.32 | 0.90 | 1.16 | 0.78 | 17.01  | 4.32 |
| Q7TSK3-2 | Isoform 3 of Protocadherin-8 OS=Mus musculus GN=Pcdh8 - [PCDH8_MOUSE]                                         | 5.28  | 3  | 3  | 3  | 5   | 1.07 | 1.18 | 1.05 | 1.04 | 0.91 | 1.11 | 0.94 | 1.04 | 0.97 | 1.08 | 1.02 | 1.25 | 1.08 | 101.82 | 5.44 |
| E9PX29   | Protein Sptbn4 OS=Mus musculus GN=Sptbn4 PE=2 SV=1 - [E9PX29_MOUSE]                                           | 22.96 | 7  | 41 | 45 | 106 | 0.92 | 0.95 | 1.03 | 0.93 | 1.01 | 1.05 | 1.10 | 1.04 | 1.13 | 0.98 | 1.06 | 1.02 | 1.09 | 288.65 | 6.00 |
| Q14AR7   | MCG6726, isoform CRA_f OS=Mus musculus GN=Mrgbp PE=2 SV=1 - [Q14AR7_MOUSE]                                    | 6.37  | 3  | 1  | 1  | 1   | 1.30 | 1.46 | 1.12 | 1.21 | 0.93 | 1.23 | 0.94 | 1.04 | 0.80 | 0.89 | 0.69 | 1.02 | 0.78 | 22.42  | 5.83 |
| P50446   | Keratin, type II cytoskeletal 6A OS=Mus musculus GN=Krt6a PE=2 SV=3 - [K2C6A_MOUSE]                           | 8.14  | 7  | 1  | 5  | 9   | 1.34 | 1.35 | 1.01 | 1.23 | 0.92 | 1.18 | 0.88 | 1.04 | 0.77 | 0.84 | 0.63 | 1.02 | 0.77 | 59.30  | 7.94 |
| Q6P3A8   | 2-oxoisovalerate dehydrogenase subunit beta, mitochondrial OS=Mus musculus GN=Bekdhb PE=2 SV=2 - [ODBB_MOUSE] | 8.21  | 2  | 2  | 2  | 3   | 1.09 | 0.94 | 0.86 | 1.16 | 1.06 | 1.09 | 0.99 | 1.04 | 0.95 | 1.04 | 0.95 | 1.06 | 0.98 | 42.85  | 6.70 |

|          |                                                                                                                                                    |       |    |    |    |    |      |      |      |      |      |      |      |      |      |      |      |      |      |        |      |
|----------|----------------------------------------------------------------------------------------------------------------------------------------------------|-------|----|----|----|----|------|------|------|------|------|------|------|------|------|------|------|------|------|--------|------|
| Q6P9Z1   | SWI/SNF-related matrix-associated actin-dependent regulator of chromatin subfamily D member 3 OS=Mus musculus GN=Smarcd3 PE=1 SV=2 - [SMRD3_MOUSE] | 10.14 | 3  | 2  | 3  | 7  | 1.04 | 1.27 | 1.04 | 1.10 | 1.06 | 1.15 | 1.01 | 1.04 | 1.01 | 1.24 | 1.08 | 1.26 | 1.15 | 54.95  | 9.35 |
| Q6ZPZ3-2 | Isoform 2 of Zinc finger CCH domain-containing protein 4 OS=Mus musculus GN=Zc3h4 - [ZC3H4_MOUSE]                                                  | 18.67 | 3  | 13 | 13 | 23 | 1.01 | 0.90 | 0.86 | 0.93 | 0.91 | 1.04 | 0.99 | 1.04 | 0.96 | 1.04 | 1.07 | 0.98 | 0.98 | 131.52 | 6.52 |
| E9Q9B2   | Protein N4bp2 (Fragment) OS=Mus musculus GN=N4bp2 PE=2 SV=1 - [E9Q9B2_MOUSE]                                                                       | 1.47  | 6  | 1  | 2  | 3  | 1.50 | 1.05 | 0.70 | 0.83 | 0.55 | 1.29 | 0.85 | 1.04 | 0.69 | 0.82 | 0.55 | 0.93 | 0.62 | 164.29 | 5.33 |
| F7BP73   | Solute carrier family 22 member 23 (Fragment) OS=Mus musculus GN=Slc22a23 PE=4 SV=1 - [F7BP73_MOUSE]                                               | 9.01  | 4  | 3  | 3  | 5  | 1.05 | 1.24 | 1.19 | 1.15 | 1.10 | 1.07 | 1.01 | 1.04 | 1.06 | 1.04 | 0.94 | 1.00 | 1.02 | 62.03  | 8.05 |
| P09470   | Angiotensin-converting enzyme OS=Mus musculus GN=Ace PE=1 SV=3 - [ACE_MOUSE]                                                                       | 1.75  | 2  | 2  | 2  | 4  | 1.00 | 1.09 | 1.09 | 1.14 | 1.13 | 0.98 | 0.97 | 1.04 | 1.03 | 1.18 | 1.18 | 1.15 | 1.15 | 150.82 | 6.55 |
| Q91YJ2   | Sorting nexin-4 OS=Mus musculus GN=Snx4 PE=2 SV=1 - [SNX4_MOUSE]                                                                                   | 16.00 | 1  | 5  | 5  | 10 | 1.09 | 1.21 | 1.10 | 1.04 | 1.05 | 0.90 | 0.95 | 1.04 | 0.98 | 1.05 | 1.00 | 1.00 | 0.96 | 51.75  | 5.80 |
| P56371   | Ras-related protein Rab4A OS=Mus musculus GN=Rab4a PE=1 SV=2 - [RAB4A_MOUSE]                                                                       | 26.15 | 10 | 2  | 5  | 51 | 1.17 | 1.75 | 1.49 | 1.17 | 1.00 | 0.99 | 0.84 | 1.04 | 0.88 | 1.03 | 0.88 | 1.17 | 1.00 | 24.39  | 6.07 |
| D3YXK0   | MCG4624, isoform CRA_c OS=Mus musculus GN=Jakmp2 PE=4 SV=2 - [D3YXK0_MOUSE]                                                                        | 15.73 | 1  | 10 | 11 | 18 | 0.97 | 0.91 | 0.90 | 0.91 | 0.99 | 0.97 | 1.12 | 1.04 | 0.97 | 0.84 | 0.89 | 0.99 | 1.07 | 96.26  | 5.97 |
| Q9D338   | 39S ribosomal protein L19, mitochondrial OS=Mus musculus GN=Mrlp19 PE=2 SV=1 - [RM19_MOUSE]                                                        | 17.12 | 1  | 3  | 3  | 4  | 0.96 | 1.03 | 0.93 | 1.03 | 0.90 | 1.24 | 1.12 | 1.04 | 0.86 | 1.33 | 1.14 | 1.16 | 0.94 | 33.56  | 9.44 |
| Q61739-2 | Isoform Alpha-6X1A of Integrin alpha-6 OS=Mus musculus GN=Itga6 - [ITA6_MOUSE]                                                                     | 2.98  | 3  | 3  | 3  | 4  | 0.95 | 0.97 | 0.81 | 1.01 | 1.06 | 0.93 | 0.92 | 1.04 | 1.00 | 0.91 | 0.96 | 0.93 | 0.90 | 119.53 | 6.96 |
| Q8R0F6-2 | Isoform 2 of Integrin-linked kinase-associated serine/threonine phosphatase 2C OS=Mus musculus GN=Ilkap - [ILKAP_MOUSE]                            | 4.46  | 2  | 1  | 1  | 2  | 0.81 | 1.09 | 1.34 | 0.90 | 1.11 | 0.92 | 1.13 | 1.04 | 1.28 | 1.01 | 1.25 | 1.11 | 1.37 | 30.02  | 7.87 |

|          |                                                                                                                 |       |   |    |    |     |      |      |      |      |      |      |      |      |      |      |      |      |      |        |      |
|----------|-----------------------------------------------------------------------------------------------------------------|-------|---|----|----|-----|------|------|------|------|------|------|------|------|------|------|------|------|------|--------|------|
| Q3UNX5   | Acyl-coenzyme A synthetase ACSM3, mitochondrial OS=Mus musculus GN=Acsm3 PE=1 SV=2 - [ACSM3_MOUSE]              | 1.21  | 2 | 1  | 1  | 1   | 1.56 | 1.04 | 0.67 | 1.17 | 0.75 | 1.13 | 0.72 | 1.04 | 0.66 | 1.33 | 0.85 | 1.49 | 0.95 | 65.58  | 7.46 |
| D3Z5J3   | Sorbin and SH3 domain-containing protein 1 OS=Mus musculus GN=Sorbs1 PE=2 SV=1 - [D3Z5J3_MOUSE]                 | 36.57 | 7 | 5  | 31 | 106 | 0.98 | 1.04 | 1.04 | 0.90 | 0.96 | 0.97 | 1.07 | 1.04 | 1.13 | 0.89 | 0.99 | 0.97 | 0.90 | 103.91 | 5.94 |
| Q8VCS6   | Mediator of RNA polymerase II transcription subunit 9 OS=Mus musculus GN=Med9 PE=2 SV=1 - [MED9_MOUSE]          | 10.56 | 1 | 1  | 1  | 2   | 1.46 | 1.82 | 1.24 | 1.23 | 0.84 | 1.38 | 0.94 | 1.04 | 0.71 | 1.12 | 0.77 | 0.91 | 0.62 | 15.70  | 7.44 |
| P09240   | Cholecystokinin OS=Mus musculus GN=Cck PE=1 SV=3 - [CCKN_MOUSE]                                                 | 8.70  | 1 | 1  | 1  | 2   | 1.26 | 1.13 | 0.89 | 1.03 | 0.81 | 1.21 | 0.95 | 1.04 | 0.82 | 1.03 | 0.81 | 1.10 | 0.87 | 12.76  | 9.35 |
| Q0VGB7   | Serine/threonine-protein phosphatase 4 regulatory subunit 2 OS=Mus musculus GN=Ppp4r2 PE=1 SV=1 - [PP4R2_MOUSE] | 9.83  | 1 | 3  | 3  | 5   | 0.91 | 0.77 | 0.79 | 0.87 | 1.06 | 1.00 | 1.09 | 1.04 | 1.16 | 0.92 | 0.95 | 0.86 | 0.93 | 46.45  | 4.56 |
| Q3UFK1   | Coiled-coil domain containing 28A OS=Mus musculus GN=Ccdc28a PE=2 SV=1 - [Q3UFK1_MOUSE]                         | 46.74 | 4 | 5  | 5  | 13  | 1.20 | 1.17 | 1.14 | 1.06 | 0.89 | 1.23 | 0.94 | 1.04 | 1.09 | 1.16 | 0.92 | 1.06 | 0.83 | 20.29  | 8.12 |
| Q7T5I3   | Serine/threonine-protein phosphatase 6 regulatory subunit 1 OS=Mus musculus GN=Ppp6r1 PE=1 SV=1 - [PP6R1_MOUSE] | 6.07  | 1 | 5  | 5  | 10  | 0.96 | 1.03 | 1.07 | 1.00 | 1.07 | 1.09 | 1.09 | 1.04 | 1.05 | 1.01 | 1.03 | 0.94 | 0.93 | 94.47  | 4.64 |
| Q61097-2 | Isoform 2 of Kinase suppressor of Ras 1 OS=Mus musculus GN=Ksr1 - [KSR1_MOUSE]                                  | 7.65  | 5 | 5  | 5  | 11  | 1.03 | 1.24 | 1.13 | 1.07 | 0.99 | 0.95 | 0.90 | 1.04 | 0.99 | 1.09 | 0.97 | 1.21 | 1.08 | 95.80  | 8.48 |
| D3Z1V2   | Regulator of G-protein-signaling 8 (Fragment) OS=Mus musculus GN=Rgs8 PE=2 SV=1 - [D3Z1V2_MOUSE]                | 6.52  | 3 | 1  | 1  | 2   | 1.22 | 1.45 | 1.19 | 1.26 | 1.04 | 1.11 | 0.91 | 1.04 | 0.85 | 1.20 | 0.99 | 1.34 | 1.10 | 16.01  | 8.92 |
| Q64727   | Vinculin OS=Mus musculus GN=Vcl PE=1 SV=4 - [VINC_MOUSE]                                                        | 40.90 | 1 | 33 | 33 | 84  | 1.04 | 1.04 | 1.01 | 1.05 | 1.02 | 1.03 | 0.99 | 1.04 | 1.02 | 1.08 | 1.09 | 1.10 | 1.07 | 116.64 | 6.00 |
| E9Q1U6   | CBP80/20-dependent translation initiation factor OS=Mus musculus GN=Ctif PE=4 SV=1 - [E9Q1U6_MOUSE]             | 7.54  | 3 | 5  | 5  | 10  | 0.95 | 1.19 | 1.25 | 0.95 | 0.97 | 1.11 | 1.10 | 1.04 | 1.08 | 0.95 | 1.00 | 1.01 | 1.07 | 70.23  | 6.61 |

|        |                                                                                                                      |       |    |    |    |     |      |      |      |      |      |      |      |      |      |      |      |      |      |        |      |
|--------|----------------------------------------------------------------------------------------------------------------------|-------|----|----|----|-----|------|------|------|------|------|------|------|------|------|------|------|------|------|--------|------|
| F7CZ64 | Voltage-dependent calcium channel gamma-8 subunit OS=Mus musculus GN=Cacng8 PE=4 SV=2 - [F7CZ64_MOUSE]               | 20.57 | 2  | 4  | 4  | 17  | 1.05 | 0.93 | 0.88 | 1.07 | 1.02 | 1.05 | 1.01 | 1.04 | 0.97 | 1.09 | 1.03 | 1.04 | 0.98 | 43.39  | 9.20 |
| Q9JL35 | High mobility group nucleosome-binding domain-containing protein 5 OS=Mus musculus GN=Hmgn5 PE=1 SV=2 - [HMG5_MOUSE] | 50.99 | 1  | 12 | 12 | 27  | 1.10 | 0.62 | 0.62 | 1.00 | 0.81 | 1.21 | 0.98 | 1.04 | 0.94 | 0.99 | 0.91 | 0.87 | 0.75 | 45.32  | 4.37 |
| Q9QZQ1 | Afadin OS=Mus musculus GN=Mlt4 PE=1 SV=3 - [AFAD_MOUSE]                                                              | 25.55 | 6  | 5  | 36 | 90  | 0.99 | 0.97 | 0.90 | 0.99 | 0.99 | 1.16 | 1.15 | 1.04 | 1.10 | 1.20 | 1.12 | 1.05 | 1.01 | 206.37 | 6.32 |
| F8VPZ3 | Ubiquitin carboxyl-terminal hydrolase OS=Mus musculus GN=Usp32 PE=2 SV=1 - [F8VPZ3_MOUSE]                            | 2.00  | 2  | 2  | 2  | 3   | 0.95 | 1.12 | 1.17 | 0.95 | 1.00 | 1.14 | 1.19 | 1.04 | 1.09 | 1.01 | 1.06 | 0.99 | 1.04 | 181.62 | 6.51 |
| D3Z645 | Vacuolar protein sorting-associated protein 29 OS=Mus musculus GN=Vps29 PE=2 SV=1 - [D3Z645_MOUSE]                   | 56.94 | 3  | 1  | 6  | 31  | 1.03 | 1.07 | 0.98 | 1.03 | 0.99 | 0.83 | 0.79 | 1.04 | 1.07 | 1.02 | 0.99 | 1.09 | 1.13 | 16.13  | 7.01 |
| E9PVU7 | cAMP-specific 3',5'-cyclic phosphodiesterase 4D OS=Mus musculus GN=Pde4d PE=2 SV=1 - [E9PVU7_MOUSE]                  | 15.57 | 11 | 7  | 10 | 21  | 0.98 | 0.91 | 0.93 | 1.02 | 1.06 | 1.05 | 0.96 | 1.04 | 1.02 | 1.02 | 1.00 | 1.06 | 0.95 | 90.70  | 5.49 |
| P70425 | GTP-binding protein Rit2 OS=Mus musculus GN=Rit2 PE=1 SV=1 - [RIT2_MOUSE]                                            | 5.53  | 1  | 1  | 1  | 2   | 1.00 | 1.24 | 1.23 | 1.20 | 1.19 | 1.06 | 1.05 | 1.04 | 1.03 | 1.18 | 1.18 | 1.38 | 1.38 | 24.79  | 6.92 |
| Q3TDD9 | Protein phosphatase 1 regulatory subunit 21 OS=Mus musculus GN=Ppp1r21 PE=2 SV=2 - [PPR21_MOUSE]                     | 20.26 | 3  | 11 | 11 | 23  | 0.93 | 0.97 | 0.94 | 1.06 | 1.15 | 0.96 | 1.09 | 1.04 | 1.06 | 1.07 | 1.09 | 1.08 | 1.11 | 88.28  | 6.90 |
| Q03157 | Amyloid-like protein 1 OS=Mus musculus GN=Apl1 PE=1 SV=1 - [APLP1_MOUSE]                                             | 20.98 | 1  | 12 | 12 | 51  | 0.99 | 1.12 | 1.06 | 0.92 | 0.90 | 1.05 | 1.05 | 1.04 | 1.00 | 1.00 | 0.99 | 1.01 | 1.00 | 72.71  | 5.67 |
| Q8R5A6 | TBC1 domain family member 22A OS=Mus musculus GN=Tbcd22a PE=2 SV=3 - [TB22A_MOUSE]                                   | 4.46  | 2  | 1  | 2  | 3   | 0.95 | 1.54 | 1.62 | 1.22 | 1.29 | 1.08 | 1.13 | 1.04 | 1.09 | 1.11 | 1.17 | 1.25 | 1.32 | 59.33  | 6.46 |
| P50114 | Protein S100-B OS=Mus musculus GN=S100b PE=2 SV=2 - [S100B_MOUSE]                                                    | 79.35 | 1  | 5  | 5  | 350 | 1.00 | 0.67 | 0.67 | 0.86 | 0.87 | 1.06 | 1.06 | 1.04 | 1.05 | 0.97 | 0.97 | 0.90 | 0.88 | 10.72  | 4.55 |

|          |                                                                                                                 |       |   |    |    |     |      |       |       |      |      |      |      |      |      |      |      |      |      |       |      |
|----------|-----------------------------------------------------------------------------------------------------------------|-------|---|----|----|-----|------|-------|-------|------|------|------|------|------|------|------|------|------|------|-------|------|
| Q8R0A5   | Transcription elongation factor A protein-like 3 OS=Mus musculus GN=Teal3 PE=1 SV=2 - [TCAL3_MOUSE]             | 54.50 | 3 | 2  | 12 | 197 | 1.46 | 0.43  | 0.33  | 1.05 | 0.85 | 1.29 | 0.92 | 1.04 | 0.66 | 0.95 | 0.64 | 0.82 | 0.64 | 22.45 | 5.44 |
| P54775   | 26S protease regulatory subunit 6B OS=Mus musculus GN=Psmc4 PE=1 SV=2 - [PRS6B_MOUSE]                           | 40.19 | 1 | 11 | 11 | 29  | 1.01 | 0.93  | 0.91  | 1.06 | 1.03 | 1.09 | 1.08 | 1.04 | 1.03 | 1.06 | 1.03 | 1.01 | 0.98 | 47.38 | 5.21 |
| Q8BIL5-2 | Isoform 2 of Protein Hook homolog 1 OS=Mus musculus GN=Hook1 - [HOOK1_MOUSE]                                    | 5.28  | 3 | 2  | 2  | 3   | 0.92 | 0.85  | 0.93  | 0.94 | 1.02 | 1.00 | 1.08 | 1.04 | 1.13 | 0.99 | 1.08 | 0.93 | 1.01 | 63.97 | 4.98 |
| Q62442-2 | Isoform 2 of Vesicle-associated membrane protein 1 OS=Mus musculus GN=Vamp1 - [VAMP1_MOUSE]                     | 42.74 | 3 | 4  | 6  | 24  | 0.96 | 1.11  | 1.15  | 1.04 | 1.12 | 0.91 | 0.93 | 1.04 | 1.04 | 1.01 | 1.02 | 0.92 | 0.94 | 12.74 | 8.47 |
| P26645   | Myristoylated alanine-rich C-kinase substrate OS=Mus musculus GN=Marcks PE=1 SV=2 - [MARCS_MOUSE]               | 73.79 | 1 | 16 | 16 | 348 | 1.31 | 0.96  | 0.83  | 1.03 | 0.78 | 1.18 | 0.90 | 1.04 | 0.84 | 1.08 | 0.86 | 1.17 | 0.89 | 29.64 | 4.34 |
| O09173   | Homogentisate 1,2-dioxygenase OS=Mus musculus GN=Hgd PE=1 SV=2 - [HGD_MOUSE]                                    | 2.47  | 1 | 1  | 1  | 1   | 0.90 | 10.12 | 11.21 | 1.01 | 1.12 | 1.09 | 1.20 | 1.04 | 1.15 | 0.93 | 1.03 | 1.09 | 1.21 | 49.93 | 7.24 |
| Q8VDM1   | Zinc finger CCCH-type with G patch domain-containing protein OS=Mus musculus GN=Zgpat PE=2 SV=1 - [ZGPAT_MOUSE] | 6.26  | 2 | 2  | 2  | 4   | 0.91 | 1.23  | 1.35  | 0.85 | 0.93 | 1.11 | 1.21 | 1.04 | 1.14 | 1.03 | 1.13 | 1.02 | 1.12 | 56.38 | 5.33 |
| Q9JLB0   | MAGUK p55 subfamily member 6 OS=Mus musculus GN=Mpp6 PE=1 SV=1 - [MPP6_MOUSE]                                   | 36.89 | 4 | 17 | 19 | 48  | 0.93 | 0.89  | 0.99  | 1.02 | 1.10 | 1.01 | 1.11 | 1.04 | 1.13 | 1.05 | 1.13 | 0.96 | 1.07 | 62.59 | 6.40 |
| Q9CQ45   | Neudessin OS=Mus musculus GN=Nenf PE=1 SV=1 - [NENF_MOUSE]                                                      | 52.63 | 1 | 6  | 6  | 38  | 1.07 | 0.76  | 0.69  | 0.90 | 0.84 | 1.11 | 1.09 | 1.04 | 1.05 | 1.00 | 0.98 | 0.88 | 0.82 | 18.89 | 5.27 |
| Q80V91   | Probable E3 ubiquitin-protein ligase DTX3 OS=Mus musculus GN=Dtx3 PE=2 SV=2 - [DTX3_MOUSE]                      | 13.83 | 3 | 3  | 3  | 10  | 1.17 | 1.03  | 0.97  | 1.02 | 0.90 | 0.97 | 0.89 | 1.04 | 0.96 | 0.99 | 0.85 | 0.97 | 0.83 | 37.96 | 8.73 |
| P48758   | Carbonyl reductase [NADPH] 1 OS=Mus musculus GN=Cbr1 PE=1 SV=3 - [CBR1_MOUSE]                                   | 54.15 | 1 | 11 | 12 | 56  | 1.07 | 1.04  | 1.00  | 1.10 | 1.00 | 1.08 | 1.02 | 1.04 | 0.97 | 1.07 | 1.04 | 1.17 | 1.07 | 30.62 | 8.31 |
| Q6W8Q3   | Purkinje cell protein 4-like protein 1 OS=Mus musculus GN=Pcp4l1 PE=2 SV=1 - [PC4L1_MOUSE]                      | 60.29 | 1 | 4  | 4  | 45  | 0.98 | 0.70  | 0.76  | 0.84 | 0.89 | 1.04 | 1.16 | 1.04 | 1.13 | 1.14 | 1.17 | 1.08 | 1.10 | 7.50  | 5.52 |

|          |                                                                                                                        |       |    |    |    |    |      |      |      |      |      |      |      |      |      |      |      |      |      |        |      |
|----------|------------------------------------------------------------------------------------------------------------------------|-------|----|----|----|----|------|------|------|------|------|------|------|------|------|------|------|------|------|--------|------|
| P37804   | Transgelin OS=Mus musculus GN=Tagln PE=1 SV=3 - [TAGL_MOUSE]                                                           | 38.31 | 1  | 7  | 7  | 14 | 1.07 | 0.93 | 0.86 | 0.86 | 0.80 | 0.88 | 0.80 | 1.04 | 1.06 | 1.03 | 0.99 | 0.84 | 0.79 | 22.56  | 8.81 |
| B7ZBW1   | Potassium voltage-gated channel subfamily KQT member 2 OS=Mus musculus GN=Kcnq2 PE=2 SV=1 - [B7ZBW1_MOUSE]             | 17.61 | 27 | 9  | 9  | 18 | 0.99 | 1.06 | 1.05 | 1.08 | 1.02 | 0.99 | 0.94 | 1.04 | 0.99 | 1.10 | 1.12 | 1.09 | 1.06 | 93.88  | 9.28 |
| Q9D0C1   | E3 ubiquitin-protein ligase RNF115 OS=Mus musculus GN=Rnf115 PE=1 SV=1 - [RNF115_MOUSE]                                | 2.95  | 1  | 1  | 1  | 2  | 1.06 | 1.07 | 1.00 | 1.03 | 0.97 | 1.02 | 0.96 | 1.04 | 0.98 | 1.06 | 1.00 | 0.96 | 0.91 | 33.84  | 5.83 |
| Q9D115   | Methylmalonyl-CoA epimerase, mitochondrial OS=Mus musculus GN=Mcee PE=2 SV=1 - [MCEE_MOUSE]                            | 54.49 | 1  | 5  | 5  | 27 | 0.90 | 0.77 | 0.86 | 0.83 | 0.93 | 1.03 | 1.14 | 1.04 | 1.16 | 0.88 | 1.04 | 0.79 | 0.89 | 19.01  | 9.09 |
| Q9Z1W9   | STE20/SPS1-related proline-alanine-rich protein kinase OS=Mus musculus GN=Stk39 PE=1 SV=1 - [STK39_MOUSE]              | 21.22 | 2  | 8  | 10 | 32 | 0.96 | 0.97 | 1.02 | 0.95 | 1.10 | 0.99 | 1.11 | 1.04 | 1.00 | 0.99 | 1.17 | 0.99 | 1.12 | 60.28  | 6.29 |
| Q99JW1-2 | Isoform 2 of Alpha/beta hydrolase domain-containing protein 17A OS=Mus musculus GN=Abhd17a - [AB17A_MOUSE]             | 9.76  | 2  | 1  | 1  | 4  | 1.04 | 1.26 | 1.21 | 1.10 | 1.06 | 0.99 | 0.95 | 1.04 | 1.00 | 1.03 | 1.00 | 0.98 | 0.95 | 26.93  | 6.95 |
| P83093   | Stromal interaction molecule 2 OS=Mus musculus GN=Stim2 PE=1 SV=2 - [STIM2_MOUSE]                                      | 16.62 | 3  | 10 | 10 | 16 | 0.92 | 1.08 | 1.20 | 1.01 | 1.07 | 1.04 | 1.00 | 1.04 | 1.11 | 0.96 | 0.96 | 0.89 | 0.94 | 83.87  | 6.79 |
| Q9D1P0   | 39S ribosomal protein L13, mitochondrial OS=Mus musculus GN=Mrpl13 PE=2 SV=1 - [RM13_MOUSE]                            | 27.53 | 2  | 4  | 4  | 8  | 0.93 | 1.03 | 1.09 | 1.04 | 1.14 | 1.08 | 1.18 | 1.04 | 1.14 | 1.07 | 1.20 | 0.96 | 1.15 | 20.66  | 9.35 |
| A2AFR3-3 | Isoform 2 of FERM and PDZ domain-containing protein 4 OS=Mus musculus GN=Frmpd4 - [FRPD4_MOUSE]                        | 3.36  | 3  | 3  | 3  | 17 | 1.23 | 1.31 | 1.04 | 1.08 | 0.86 | 1.09 | 0.94 | 1.04 | 0.87 | 0.97 | 0.82 | 0.99 | 0.81 | 140.41 | 5.20 |
| G3UYN6   | PCTP-like protein (Fragment) OS=Mus musculus GN=Stard10 PE=4 SV=1 - [G3UYN6_MOUSE]                                     | 13.79 | 6  | 1  | 1  | 2  | 0.76 | 0.72 | 0.94 | 0.86 | 1.13 | 0.74 | 0.97 | 1.04 | 1.36 | 0.73 | 0.96 | 0.82 | 1.08 | 9.62   | 6.68 |
| D3Z285   | NFU1 iron-sulfur cluster scaffold homolog, mitochondrial (Fragment) OS=Mus musculus GN=Nfu1 PE=2 SV=1 - [D3Z285_MOUSE] | 25.63 | 1  | 1  | 4  | 29 | 0.96 | 0.81 | 0.87 | 0.99 | 1.01 | 1.04 | 1.11 | 1.04 | 1.13 | 1.01 | 1.04 | 0.95 | 0.98 | 22.01  | 4.96 |

|         |                                                                                                            |       |   |   |    |    |      |      |      |      |      |       |       |      |      |      |      |      |      |        |      |
|---------|------------------------------------------------------------------------------------------------------------|-------|---|---|----|----|------|------|------|------|------|-------|-------|------|------|------|------|------|------|--------|------|
| Q7TNY3  | Calciressin 1 large isoform OS=Mus musculus GN=Rcan1 PE=2 SV=1 - [Q7TNY3_MOUSE]                            | 11.95 | 4 | 2 | 2  | 7  | 0.94 | 0.95 | 0.96 | 0.91 | 0.98 | 0.86  | 0.87  | 1.04 | 1.01 | 0.72 | 0.78 | 0.86 | 0.85 | 28.12  | 5.41 |
| Q9Z0G0  | PDZ domain-containing protein GIPC1 OS=Mus musculus GN=Gipc1 PE=1 SV=1 - [GIPC1_MOUSE]                     | 30.03 | 2 | 6 | 6  | 20 | 0.95 | 0.97 | 1.00 | 0.99 | 1.05 | 1.09  | 1.19  | 1.04 | 1.17 | 1.06 | 1.13 | 0.98 | 1.05 | 36.11  | 5.91 |
| Q8VE42  | Ankyrin repeat domain-containing protein 49 OS=Mus musculus GN=Ankr49 PE=1 SV=1 - [ANR49_MOUSE]            | 21.43 | 1 | 4 | 4  | 9  | 1.05 | 0.88 | 0.83 | 1.03 | 0.96 | 1.31  | 1.20  | 1.04 | 1.19 | 1.24 | 1.02 | 1.03 | 0.88 | 27.09  | 5.16 |
| P62309  | Small nuclear ribonucleoprotein G OS=Mus musculus GN=Snrgp PE=1 SV=1 - [RUXG_MOUSE]                        | 25.00 | 1 | 2 | 2  | 7  | 0.93 | 0.98 | 1.08 | 0.92 | 1.01 | 0.97  | 1.04  | 1.04 | 1.08 | 0.83 | 0.89 | 0.93 | 0.96 | 8.49   | 8.88 |
| Q6PAV2- | Isoform 2 of Probable E3 ubiquitin-protein ligase HERC4 OS=Mus musculus GN=Herc4 - [HERC4_MOUSE]           | 3.91  | 2 | 3 | 3  | 5  | 1.03 | 1.29 | 1.24 | 1.07 | 1.04 | 0.91  | 0.88  | 1.04 | 0.94 | 0.99 | 0.96 | 1.24 | 1.20 | 117.51 | 6.37 |
| Q9Z0V1- | Isoform 2 of Potassium voltage-gated channel subfamily D member 3 OS=Mus musculus GN=Kcnd3 - [KCND3_MOUSE] | 8.65  | 3 | 3 | 3  | 7  | 1.18 | 0.99 | 0.76 | 1.08 | 0.90 | 1.09  | 0.82  | 1.04 | 0.83 | 1.13 | 0.91 | 0.94 | 0.74 | 71.36  | 8.25 |
| Q8VCG3  | WD repeat-containing protein 74 OS=Mus musculus GN=Wdr74 PE=2 SV=1 - [WDR74_MOUSE]                         | 3.65  | 1 | 1 | 1  | 2  | 0.91 | 1.05 | 1.15 | 1.04 | 1.14 | 1.17  | 1.27  | 1.04 | 1.14 | 1.11 | 1.23 | 1.16 | 1.28 | 42.61  | 7.78 |
| Q9D0D4  | Probable dimethyladenosine transferase OS=Mus musculus GN=Dimt1 PE=2 SV=1 - [DIM1_MOUSE]                   | 2.88  | 1 | 1 | 1  | 2  | 1.17 | 1.80 | 1.53 | 1.13 | 0.97 | 0.98  | 0.83  | 1.04 | 0.89 | 1.03 | 0.88 | 1.00 | 0.85 | 35.25  | 9.99 |
| P05977  | Myosin light chain 1/3, skeletal muscle isoform OS=Mus musculus GN=Myl1 PE=1 SV=2 - [MYL1_MOUSE]           | 75.00 | 4 | 9 | 12 | 86 | 1.01 | 1.42 | 1.42 | 0.81 | 0.96 | 15.39 | 19.49 | 1.04 | 1.05 | 1.02 | 0.94 | 1.04 | 1.05 | 20.58  | 5.03 |
| Q8VE95  | UPF0598 protein C8orf82 homolog OS=Mus musculus PE=2 SV=1 - [CH082_MOUSE]                                  | 4.13  | 1 | 1 | 1  | 1  | 1.03 | 1.08 | 1.04 | 1.21 | 1.17 | 1.01  | 0.97  | 1.04 | 1.00 | 1.24 | 1.20 | 1.22 | 1.18 | 24.31  | 8.70 |
| D3Z0V7  | TSC22 domain family protein 1 OS=Mus musculus GN=Tsc22d1 PE=2 SV=1 - [D3Z0V7_MOUSE]                        | 14.17 | 6 | 8 | 11 | 61 | 0.85 | 0.77 | 0.94 | 0.86 | 1.01 | 1.14  | 1.24  | 1.04 | 1.25 | 0.98 | 1.14 | 0.93 | 1.19 | 102.02 | 5.77 |



|          |                                                                                                         |       |   |    |    |     |      |      |      |      |      |      |      |      |      |      |      |      |      |        |      |
|----------|---------------------------------------------------------------------------------------------------------|-------|---|----|----|-----|------|------|------|------|------|------|------|------|------|------|------|------|------|--------|------|
| Q9Z1D1   | Eukaryotic translation initiation factor 3 subunit G OS=Mus musculus GN=EIF3g PE=1 SV=2 - [EIF3G_MOUSE] | 37.19 | 1 | 9  | 9  | 57  | 1.03 | 0.94 | 0.92 | 0.88 | 0.84 | 1.04 | 0.95 | 1.04 | 1.01 | 0.90 | 0.89 | 0.92 | 0.86 | 35.62  | 5.90 |
| Q80Z10-2 | Isoform 2 of Astrotactin-2 OS=Mus musculus GN=Astn2 - [ASTN2_MOUSE]                                     | 7.72  | 3 | 7  | 7  | 14  | 0.91 | 1.24 | 1.46 | 1.09 | 1.20 | 0.93 | 1.00 | 1.04 | 1.08 | 0.93 | 1.02 | 0.85 | 0.95 | 148.80 | 6.02 |
| E9Q0W8   | Small nuclear ribonucleoprotein E OS=Mus musculus GN=Snrpe PE=2 SV=1 - [E9Q0W8_MOUSE]                   | 21.15 | 3 | 1  | 1  | 1   | 1.03 | 1.13 | 1.09 | 0.87 | 0.84 | 0.94 | 0.90 | 1.04 | 1.00 | 1.01 | 0.98 | 1.03 | 1.00 | 6.16   | 9.85 |
| Q6A0D4   | Raftlin OS=Mus musculus GN=Rftn1 PE=1 SV=4 - [RFTN1_MOUSE]                                              | 9.03  | 1 | 2  | 2  | 8   | 1.21 | 1.33 | 1.10 | 1.17 | 0.86 | 1.05 | 0.87 | 1.04 | 0.78 | 1.21 | 0.94 | 1.19 | 1.07 | 61.50  | 7.68 |
| Q8K0C8   | Cytochrome c oxidase assembly protein COX19 OS=Mus musculus GN=Cox19 PE=3 SV=1 - [COX19_MOUSE]          | 34.78 | 1 | 3  | 3  | 5   | 1.02 | 0.84 | 0.87 | 0.94 | 0.99 | 1.15 | 1.12 | 1.04 | 1.08 | 1.00 | 1.01 | 0.93 | 0.90 | 10.81  | 8.07 |
| Q8BHE5   | Bone morphogenetic protein 3 OS=Mus musculus GN=Bmp3 PE=1 SV=1 - [BMP3_MOUSE]                           | 2.78  | 1 | 1  | 1  | 2   | 1.14 | 0.98 | 0.86 | 1.02 | 0.90 | 1.09 | 0.95 | 1.04 | 0.91 | 0.95 | 0.84 | 0.94 | 0.83 | 52.74  | 9.38 |
| O35098   | Dihydropyrimidinase-related protein 4 OS=Mus musculus GN=Dpysl4 PE=1 SV=1 - [DPYL4_MOUSE]               | 46.50 | 4 | 16 | 18 | 119 | 1.01 | 1.05 | 1.07 | 1.04 | 1.02 | 1.02 | 1.03 | 1.04 | 0.99 | 1.01 | 0.99 | 0.99 | 1.05 | 61.92  | 6.98 |
| Q4KMM3   | Oxidation resistance protein 1 OS=Mus musculus GN=Oxr1 PE=1 SV=3 - [OXR1_MOUSE]                         | 68.01 | 6 | 49 | 49 | 552 | 0.95 | 0.87 | 0.93 | 0.89 | 0.93 | 0.96 | 1.01 | 1.04 | 1.06 | 0.87 | 0.89 | 0.87 | 0.90 | 95.85  | 5.33 |
| Q6PDG8-  | Isoform 2 of Vacuolar fusion protein MON1 homolog A OS=Mus musculus GN=Mon1a - [MON1A_MOUSE]            | 5.86  | 2 | 1  | 1  | 4   | 0.96 | 1.00 | 1.03 | 1.12 | 1.17 | 1.23 | 1.27 | 1.04 | 1.08 | 0.98 | 1.02 | 1.06 | 1.10 | 51.13  | 6.06 |
| Q8C178   | Acyl-coenzyme A oxidase OS=Mus musculus GN=Acox3 PE=2 SV=1 - [Q8C178_MOUSE]                             | 1.72  | 3 | 1  | 1  | 2   | 1.06 | 1.59 | 1.51 | 0.97 | 0.92 | 1.00 | 0.94 | 1.04 | 0.98 | 0.96 | 0.91 | 1.07 | 1.01 | 77.82  | 7.11 |
| O70309   | Integrin beta-5 OS=Mus musculus GN=Itgb5 PE=1 SV=2 - [ITB5_MOUSE]                                       | 4.14  | 5 | 2  | 3  | 5   | 1.05 | 1.39 | 1.32 | 1.09 | 1.04 | 0.94 | 0.89 | 1.04 | 0.99 | 1.09 | 1.04 | 1.19 | 1.13 | 87.85  | 6.16 |
| Q7TQE6   | Macoilin OS=Mus musculus GN=Tmem57 PE=2 SV=1 - [MACOL_MOUSE]                                            | 1.20  | 1 | 1  | 1  | 1   | 1.20 | 2.09 | 1.74 | 1.13 | 0.94 | 1.47 | 1.22 | 1.04 | 0.87 | 1.07 | 0.90 | 1.05 | 0.88 | 76.04  | 9.07 |
| E9QM77   | Ataxin-2 OS=Mus musculus GN=Atxn2 PE=2 SV=1 - [E9QM77_MOUSE]                                            | 16.95 | 7 | 16 | 16 | 45  | 0.89 | 0.75 | 0.82 | 0.87 | 0.97 | 0.98 | 1.08 | 1.04 | 1.17 | 0.89 | 1.06 | 0.81 | 0.92 | 136.38 | 9.54 |

|          |                                                                                                                   |       |   |    |    |     |      |      |      |      |      |      |      |      |      |      |      |      |      |        |      |
|----------|-------------------------------------------------------------------------------------------------------------------|-------|---|----|----|-----|------|------|------|------|------|------|------|------|------|------|------|------|------|--------|------|
| A2AFJ1   | Histone-binding protein RBBP7<br>OS=Mus musculus<br>GN=Rbbp7 PE=2<br>SV=1 -<br>[A2AFJ1_MOUSE]                     | 27.40 | 5 | 5  | 8  | 67  | 0.80 | 0.80 | 0.98 | 0.80 | 0.99 | 0.94 | 1.21 | 1.04 | 1.30 | 0.85 | 1.04 | 0.82 | 1.02 | 46.88  | 5.07 |
| Q8C4C4   | Repulsive guidance molecule A OS=Mus musculus<br>GN=Rgma PE=2 SV=1 -<br>[Q8C4C4_MOUSE]                            | 13.37 | 3 | 3  | 3  | 5   | 1.20 | 1.39 | 1.19 | 1.19 | 0.96 | 1.15 | 0.95 | 1.04 | 0.97 | 1.02 | 0.97 | 1.02 | 1.00 | 37.84  | 6.60 |
| P70429-2 | Isoform 1 of Ena/VASP-like protein<br>OS=Mus musculus<br>GN=Evl -<br>[EVL_MOUSE]                                  | 35.37 | 4 | 10 | 10 | 27  | 0.98 | 0.89 | 0.87 | 0.99 | 0.92 | 0.98 | 0.98 | 1.04 | 0.97 | 0.99 | 0.94 | 0.98 | 0.95 | 42.10  | 8.35 |
| P58404-2 | Isoform 2 of Striatin-4<br>OS=Mus musculus<br>GN=Strn4 -<br>[STRN4_MOUSE]                                         | 33.86 | 3 | 14 | 15 | 41  | 0.97 | 1.03 | 1.04 | 0.99 | 1.00 | 1.01 | 1.09 | 1.04 | 1.09 | 1.01 | 1.01 | 0.97 | 0.94 | 80.93  | 5.38 |
| P52480   | Pyruvate kinase PKM<br>OS=Mus musculus<br>GN=Pkm PE=1 SV=4 -<br>[KPYM_MOUSE]                                      | 80.98 | 4 | 2  | 44 | 824 | 1.12 | 1.10 | 0.87 | 1.18 | 1.01 | 1.06 | 0.96 | 1.04 | 0.94 | 0.92 | 0.95 | 1.06 | 0.92 | 57.81  | 7.47 |
| D3Z601   | Calsynenin-3<br>OS=Mus musculus<br>GN=Clstn3 PE=2<br>SV=1 -<br>[D3Z601_MOUSE]                                     | 10.99 | 2 | 6  | 6  | 10  | 0.98 | 1.03 | 1.00 | 0.97 | 0.95 | 0.96 | 0.92 | 1.04 | 1.04 | 1.01 | 1.01 | 0.94 | 0.93 | 101.75 | 5.27 |
| P97792   | Coxsackievirus and adenovirus receptor homolog<br>OS=Mus musculus<br>GN=Cxadr PE=1 SV=1 -<br>[CXAR_MOUSE]         | 19.18 | 3 | 5  | 5  | 9   | 1.12 | 0.95 | 0.87 | 1.08 | 0.99 | 1.09 | 1.00 | 1.04 | 0.94 | 0.99 | 0.92 | 0.93 | 0.85 | 39.92  | 6.96 |
| Q6NV83-  | Isoform 3 of U2 snRNP associated SURP motif-containing protein<br>OS=Mus musculus<br>GN=U2surp -<br>[SR140_MOUSE] | 4.16  | 3 | 3  | 3  | 4   | 0.98 | 0.81 | 0.76 | 1.05 | 1.07 | 1.02 | 1.02 | 1.04 | 1.09 | 1.02 | 1.13 | 1.25 | 1.17 | 113.19 | 8.35 |
| A2AP93   | Mitogen-activated protein kinase kinase 7<br>OS=Mus musculus<br>GN=Map3k7 PE=2 SV=1 -<br>[A2AP93_MOUSE]           | 8.15  | 4 | 3  | 3  | 8   | 0.98 | 0.88 | 0.90 | 0.97 | 1.03 | 0.99 | 1.00 | 1.04 | 1.07 | 1.01 | 1.09 | 0.83 | 0.91 | 53.72  | 6.68 |
| P32067   | Lupus La protein homolog<br>OS=Mus musculus<br>GN=Ssb PE=2 SV=1 -<br>[LA_MOUSE]                                   | 26.75 | 4 | 11 | 11 | 20  | 1.06 | 0.84 | 0.88 | 1.03 | 1.00 | 1.04 | 1.04 | 1.04 | 1.03 | 0.95 | 0.94 | 0.93 | 0.93 | 47.73  | 9.77 |
| Q55VQ0-  | Isoform 4 of Histone acetyltransferase KAT7<br>OS=Mus musculus<br>GN=Kat7 -<br>[KAT7_MOUSE]                       | 5.16  | 4 | 2  | 2  | 6   | 0.83 | 0.88 | 1.01 | 0.94 | 1.06 | 0.98 | 1.10 | 1.04 | 1.17 | 0.95 | 1.09 | 0.97 | 1.10 | 66.87  | 8.72 |
| Q9JH6    | Alcohol dehydrogenase [NADP(+)]<br>OS=Mus musculus<br>GN=Akr1a1 PE=1 SV=3 -<br>[AK1A1_MOUSE]                      | 40.92 | 2 | 11 | 11 | 36  | 0.96 | 1.07 | 1.11 | 1.01 | 1.08 | 1.00 | 1.06 | 1.04 | 1.09 | 1.04 | 1.06 | 1.07 | 1.12 | 36.56  | 7.39 |

|        |                                                                                                                             |       |   |    |    |     |      |      |      |      |      |      |      |      |      |      |      |      |      |       |      |
|--------|-----------------------------------------------------------------------------------------------------------------------------|-------|---|----|----|-----|------|------|------|------|------|------|------|------|------|------|------|------|------|-------|------|
| Q61140 | Breast cancer anti-estrogen resistance protein 1 OS=Mus musculus GN=Bcar1 PE=1 SV=2 - [BCAR1_MOUSE]                         | 11.90 | 2 | 6  | 6  | 13  | 1.07 | 1.11 | 1.03 | 0.92 | 0.89 | 1.04 | 1.05 | 1.04 | 0.96 | 0.91 | 1.12 | 1.05 | 1.09 | 94.23 | 5.68 |
| E0CX79 | Zinc finger protein-like 1 (Fragment) OS=Mus musculus GN=Zfp1 PE=2 SV=1 - [E0CX79_MOUSE]                                    | 13.18 | 5 | 2  | 2  | 3   | 1.01 | 1.34 | 1.33 | 0.98 | 0.96 | 0.95 | 0.97 | 1.04 | 1.00 | 1.01 | 1.05 | 1.22 | 1.24 | 14.50 | 8.37 |
| P70445 | Eukaryotic translation initiation factor 4E-binding protein 2 OS=Mus musculus GN=Ef4ebp2 PE=2 SV=1 - [4EBP2_MOUSE]          | 73.33 | 1 | 5  | 5  | 22  | 1.08 | 1.06 | 1.02 | 0.94 | 0.86 | 1.06 | 1.06 | 1.04 | 1.01 | 0.99 | 0.99 | 0.98 | 0.98 | 12.89 | 6.52 |
| Q3TW96 | UDP-N-acetylhexosamine pyrophosphorylase-like protein 1 OS=Mus musculus GN=Uap111 PE=2 SV=1 - [UAP11_MOUSE]                 | 13.02 | 2 | 6  | 6  | 9   | 1.03 | 1.13 | 1.11 | 1.07 | 1.03 | 1.02 | 0.95 | 1.04 | 1.04 | 1.01 | 1.01 | 1.10 | 0.97 | 56.58 | 5.43 |
| O70433 | Four and a half LIM domains protein 2 OS=Mus musculus GN=Fhl2 PE=1 SV=1 - [FHL2_MOUSE]                                      | 47.31 | 1 | 12 | 12 | 38  | 0.92 | 0.82 | 0.96 | 0.91 | 0.95 | 1.12 | 1.14 | 1.04 | 1.09 | 0.91 | 0.98 | 0.85 | 0.96 | 32.05 | 7.30 |
| O55241 | Orexin OS=Mus musculus GN=Hert PE=2 SV=1 - [OREX_MOUSE]                                                                     | 10.00 | 1 | 1  | 1  | 5   | 1.08 | 1.03 | 1.01 | 1.04 | 0.97 | 1.20 | 1.09 | 1.04 | 0.94 | 1.06 | 0.95 | 1.15 | 1.14 | 13.49 | 9.70 |
| Q2WF71 | Leucine-rich repeat and fibronectin type III domain-containing protein 1 OS=Mus musculus GN=Lrfn1 PE=1 SV=1 - [LRFN1_MOUSE] | 7.96  | 3 | 4  | 4  | 7   | 1.05 | 1.17 | 1.05 | 1.22 | 1.09 | 1.00 | 0.88 | 1.04 | 0.93 | 1.13 | 1.03 | 0.97 | 0.88 | 81.89 | 7.59 |
| Q8BZW2 | Ankyrin repeat domain-containing protein SOWAHB OS=Mus musculus GN=Sowahb PE=2 SV=1 - [SWAHB_MOUSE]                         | 2.37  | 1 | 1  | 1  | 2   | 0.95 | 0.78 | 0.81 | 0.99 | 1.04 | 1.00 | 1.05 | 1.04 | 1.10 | 0.96 | 1.01 | 0.88 | 0.92 | 83.49 | 8.27 |
| Q9JKL5 | Calcineurin B homologous protein 3 OS=Mus musculus GN=Tesc PE=1 SV=2 - [CHP3_MOUSE]                                         | 29.44 | 1 | 5  | 5  | 13  | 0.98 | 0.98 | 1.01 | 0.98 | 0.94 | 1.01 | 0.99 | 1.04 | 1.04 | 1.04 | 1.04 | 1.11 | 1.13 | 24.58 | 4.98 |
| P19157 | Glutathione S-transferase P 1 OS=Mus musculus GN=Gstp1 PE=1 SV=2 - [GSTP1_MOUSE]                                            | 83.81 | 3 | 10 | 10 | 137 | 1.03 | 1.00 | 0.96 | 1.00 | 1.01 | 1.03 | 1.02 | 1.04 | 1.03 | 1.08 | 1.07 | 1.14 | 1.15 | 23.59 | 7.87 |

|        |                                                                                                                       |       |   |    |    |      |      |      |      |      |      |      |      |      |      |      |      |      |      |        |      |
|--------|-----------------------------------------------------------------------------------------------------------------------|-------|---|----|----|------|------|------|------|------|------|------|------|------|------|------|------|------|------|--------|------|
| Q9DAS9 | Guanine nucleotide-binding protein G(I)/G(S)/G(O) subunit gamma-12 OS=Mus musculus GN=Gng12 PE=1 SV=3 - [GBG12_MOUSE] | 58.33 | 1 | 4  | 4  | 36   | 1.05 | 1.13 | 1.07 | 1.00 | 1.02 | 1.04 | 1.01 | 1.04 | 0.99 | 1.04 | 0.99 | 1.08 | 1.03 | 7.99   | 8.97 |
| Q9WV92 | Band 4.1-like protein 3 OS=Mus musculus GN=Epb4113 PE=1 SV=1 - [E41L3_MOUSE]                                          | 56.94 | 3 | 3  | 42 | 323  | 1.02 | 0.97 | 0.92 | 0.89 | 0.92 | 1.07 | 1.06 | 1.04 | 1.07 | 1.01 | 1.00 | 0.91 | 0.94 | 103.27 | 5.31 |
| Q9R1Q8 | Transgelin-3 OS=Mus musculus GN=Tagln3 PE=1 SV=1 - [TAGL3_MOUSE]                                                      | 67.34 | 1 | 12 | 13 | 97   | 0.84 | 0.77 | 0.96 | 0.79 | 0.98 | 0.92 | 1.13 | 1.04 | 1.21 | 0.84 | 1.00 | 0.82 | 1.03 | 22.46  | 7.33 |
| P68033 | Actin, alpha cardiac muscle 1 OS=Mus musculus GN=Actc1 PE=1 SV=1 - [ACTC_MOUSE]                                       | 76.39 | 6 | 2  | 27 | 1024 | 0.83 | 0.93 | 1.01 | 1.05 | 1.21 | 0.70 | 0.82 | 1.04 | 1.16 | 1.24 | 1.49 | 0.85 | 1.03 | 41.99  | 5.39 |
| F6YFN0 | ER11 exoribonuclease 3 (Fragment) OS=Mus musculus GN=Eri3 PE=2 SV=1 - [F6YFN0_MOUSE]                                  | 13.24 | 4 | 1  | 1  | 2    | 1.37 | 1.08 | 0.79 | 1.11 | 0.81 | 1.15 | 0.83 | 1.04 | 0.76 | 1.02 | 0.74 | 1.13 | 0.83 | 7.83   | 5.29 |
| B7ZP47 | Wapal protein OS=Mus musculus GN=Wapal PE=2 SV=1 - [B7ZP47_MOUSE]                                                     | 1.09  | 2 | 1  | 1  | 3    | 0.94 | 0.77 | 0.81 | 0.95 | 1.00 | 1.05 | 1.11 | 1.04 | 1.11 | 1.11 | 1.18 | 1.00 | 1.07 | 133.27 | 5.47 |
| O88597 | Beclin-1 OS=Mus musculus GN=Becn1 PE=1 SV=3 - [BECN1_MOUSE]                                                           | 13.39 | 4 | 5  | 5  | 18   | 1.06 | 1.25 | 1.05 | 1.08 | 1.03 | 1.19 | 1.09 | 1.05 | 1.01 | 1.16 | 1.07 | 1.04 | 1.00 | 51.56  | 4.93 |
| Q08509 | Epidermal growth factor receptor kinase substrate 8 OS=Mus musculus GN=Eps8 PE=1 SV=2 - [EPS8_MOUSE]                  | 18.39 | 3 | 11 | 11 | 27   | 1.01 | 1.04 | 0.93 | 1.00 | 0.94 | 1.00 | 0.96 | 1.05 | 0.97 | 1.05 | 0.97 | 1.12 | 1.03 | 91.68  | 7.65 |
| A2AES3 | OTU domain-containing protein 5 OS=Mus musculus GN=Otud5 PE=2 SV=1 - [A2AES3_MOUSE]                                   | 10.06 | 5 | 3  | 3  | 6    | 1.02 | 1.00 | 0.92 | 0.86 | 0.90 | 1.01 | 0.93 | 1.05 | 0.97 | 1.11 | 1.09 | 0.95 | 1.00 | 55.89  | 5.95 |
| Q80W93 | Hydrocephalus-inducing protein OS=Mus musculus GN=Hydin PE=2 SV=2 - [HYDIN_MOUSE]                                     | 0.35  | 1 | 1  | 2  | 4    | 1.08 | 1.00 | 0.93 | 1.07 | 0.99 | 1.02 | 0.94 | 1.05 | 0.97 | 1.09 | 1.01 | 1.09 | 1.02 | 581.15 | 6.38 |
| Q9Z2R6 | Protein unc-119 homolog A OS=Mus musculus GN=Unc119 PE=1 SV=1 - [U119A_MOUSE]                                         | 5.42  | 2 | 1  | 1  | 1    | 1.04 | 1.09 | 1.04 | 0.99 | 0.96 | 1.00 | 0.96 | 1.05 | 1.00 | 0.93 | 0.89 | 1.00 | 0.97 | 26.99  | 6.15 |
| E0CY91 | Ubiquitin-like protein 5 OS=Mus musculus GN=Ubi5 PE=2 SV=1 - [E0CY91_MOUSE]                                           | 42.55 | 6 | 2  | 2  | 4    | 1.06 | 1.07 | 1.15 | 0.95 | 0.89 | 1.38 | 1.20 | 1.05 | 0.98 | 1.23 | 1.33 | 0.97 | 1.05 | 5.40   | 9.80 |

|          |                                                                                                                       |       |   |    |    |     |      |      |      |      |      |      |      |      |      |      |      |      |      |        |      |
|----------|-----------------------------------------------------------------------------------------------------------------------|-------|---|----|----|-----|------|------|------|------|------|------|------|------|------|------|------|------|------|--------|------|
| Q8C2Q3   | RNA-binding protein 14 OS=Mus musculus GN=Rbm14 PE=1 SV=1 - [RBM14_MOUSE]                                             | 22.57 | 5 | 14 | 15 | 75  | 0.97 | 0.95 | 0.96 | 0.97 | 0.98 | 1.01 | 1.08 | 1.05 | 1.10 | 1.02 | 1.05 | 1.04 | 1.04 | 69.41  | 9.67 |
| Q60841-3 | Isoform 3 of Reelin OS=Mus musculus GN=ReIn - [RELN_MOUSE]                                                            | 0.67  | 3 | 2  | 2  | 3   | 1.14 | 0.91 | 0.79 | 0.89 | 0.78 | 0.94 | 0.82 | 1.05 | 0.91 | 1.16 | 1.02 | 1.06 | 0.93 | 382.95 | 5.55 |
| Q9EQX4   | Allograft inflammatory factor 1-like OS=Mus musculus GN=Aif11 PE=2 SV=1 - [AIF1L_MOUSE]                               | 11.33 | 1 | 2  | 2  | 2   | 0.83 | 0.98 | 0.97 | 0.80 | 0.96 | 0.92 | 1.09 | 1.05 | 1.25 | 1.10 | 0.99 | 0.94 | 1.13 | 17.01  | 7.18 |
| Q8BZ81-2 | Isoform 2 of Leucine-rich repeat transmembrane neuronal protein 3 OS=Mus musculus GN=Lrrtm3 - [LRR3_MOUSE]            | 2.33  | 2 | 1  | 1  | 2   | 1.16 | 1.02 | 0.88 | 1.30 | 1.12 | 1.04 | 0.89 | 1.05 | 0.90 | 1.07 | 0.93 | 1.11 | 0.96 | 58.48  | 9.61 |
| P70460   | Vasodilator-stimulated phosphoprotein OS=Mus musculus GN=Vasp PE=1 SV=4 - [VASP_MOUSE]                                | 15.47 | 1 | 4  | 4  | 8   | 0.86 | 0.76 | 0.87 | 0.84 | 0.97 | 0.99 | 1.17 | 1.05 | 1.28 | 1.11 | 1.30 | 0.99 | 1.09 | 39.64  | 8.53 |
| Q91YN5-  | Isoform AGX1 of UDP-N-acetylhexosamine pyrophosphorylase OS=Mus musculus GN=Uap1 - [UAP1_MOUSE]                       | 7.13  | 4 | 3  | 3  | 4   | 0.97 | 1.23 | 1.26 | 0.89 | 0.94 | 0.87 | 0.89 | 1.05 | 1.07 | 1.01 | 0.94 | 1.07 | 1.07 | 56.86  | 6.54 |
| Q9WUM5   | Succinyl-CoA ligase [ADP:GDP-forming] subunit alpha, mitochondrial OS=Mus musculus GN=Suc1g1 PE=1 SV=4 - [SUCA_MOUSE] | 35.55 | 1 | 10 | 10 | 68  | 0.92 | 0.78 | 0.89 | 0.92 | 0.99 | 1.02 | 1.15 | 1.05 | 1.14 | 1.00 | 1.18 | 1.03 | 1.08 | 36.13  | 9.39 |
| G5E8R8   | MCG129950, isoform CRA_a OS=Mus musculus GN=Ubx7 PE=4 SV=1 - [G5E8R8_MOUSE]                                           | 19.43 | 1 | 2  | 7  | 10  | 0.92 | 0.78 | 0.84 | 0.93 | 1.00 | 1.03 | 1.11 | 1.05 | 1.13 | 0.87 | 0.95 | 0.95 | 1.03 | 54.78  | 5.16 |
| Q9DBZ5   | Eukaryotic translation initiation factor 3 subunit K OS=Mus musculus GN=EIF3k PE=1 SV=1 - [EIF3K_MOUSE]               | 12.84 | 2 | 2  | 2  | 3   | 1.11 | 1.14 | 1.03 | 1.05 | 0.94 | 1.04 | 0.94 | 1.05 | 0.94 | 1.07 | 0.97 | 0.75 | 0.68 | 25.07  | 4.93 |
| Q5SWZ5   | Myosin phosphatase Rho-interacting protein OS=Mus musculus GN=Mprip PE=2 SV=1 - [Q5SWZ5_MOUSE]                        | 17.94 | 2 | 6  | 29 | 63  | 0.96 | 1.05 | 1.05 | 0.97 | 1.02 | 1.12 | 1.16 | 1.05 | 1.07 | 0.93 | 0.98 | 1.01 | 1.05 | 257.13 | 5.59 |
| P08003   | Protein disulfide-isomerase A4 OS=Mus musculus GN=Pdia4 PE=1 SV=3 - [PDIA4_MOUSE]                                     | 49.37 | 1 | 26 | 26 | 101 | 1.03 | 0.82 | 0.82 | 0.93 | 0.91 | 1.03 | 1.01 | 1.05 | 1.02 | 1.01 | 0.95 | 0.89 | 0.89 | 71.94  | 5.31 |

|        |                                                                                                                    |       |    |    |    |     |      |      |      |      |      |      |      |      |      |      |      |      |      |        |       |
|--------|--------------------------------------------------------------------------------------------------------------------|-------|----|----|----|-----|------|------|------|------|------|------|------|------|------|------|------|------|------|--------|-------|
| Q8BYH8 | Isoform 2 of Chromodomain-helicase-DNA-binding protein 9 OS=Mus musculus GN=Cbd9 - [CHD9_MOUSE]                    | 0.45  | 16 | 1  | 2  | 2   | 0.99 | 1.03 | 1.03 | 0.87 | 0.87 | 1.14 | 1.14 | 1.05 | 1.05 | 1.08 | 1.09 | 1.02 | 1.03 | 321.69 | 7.39  |
| G3X9V2 | Catenin (Cadherin associated protein), delta 1, isoform CRA_a OS=Mus musculus GN=Ctnnd1 PE=4 SV=1 - [G3X9V2_MOUSE] | 9.98  | 19 | 7  | 7  | 16  | 0.96 | 1.16 | 1.20 | 1.02 | 1.12 | 0.97 | 1.02 | 1.05 | 1.01 | 1.01 | 1.04 | 1.00 | 1.01 | 104.04 | 6.95  |
| O35648 | Centrin-3 OS=Mus musculus GN=Ctn3 PE=2 SV=1 - [CETN3_MOUSE]                                                        | 7.19  | 1  | 1  | 1  | 6   | 1.14 | 1.20 | 1.05 | 0.97 | 0.84 | 1.12 | 0.82 | 1.05 | 0.92 | 1.11 | 0.80 | 0.95 | 0.81 | 19.51  | 4.78  |
| Q4ACU6 | SH3 and multiple ankyrin repeat domains protein 3 OS=Mus musculus GN=Shank3 PE=1 SV=2 - [SHAN3_MOUSE]              | 22.05 | 3  | 25 | 25 | 94  | 0.96 | 1.00 | 1.08 | 1.05 | 1.09 | 0.99 | 1.05 | 1.05 | 1.08 | 1.02 | 1.12 | 1.04 | 1.12 | 192.10 | 8.90  |
| Q99M87 | DnaJ homolog subfamily A member 3, mitochondrial OS=Mus musculus GN=Dnaja3 PE=1 SV=1 - [DNJA3_MOUSE]               | 26.25 | 3  | 10 | 10 | 18  | 0.95 | 0.87 | 0.99 | 0.96 | 1.02 | 0.93 | 1.04 | 1.05 | 1.05 | 0.90 | 0.91 | 0.88 | 0.93 | 52.41  | 9.22  |
| Q6P8M1 | Isoform 2 of Putative deoxyribonuclease TATDN1 OS=Mus musculus GN=Tatdn1 - [TATD1_MOUSE]                           | 7.48  | 2  | 2  | 2  | 2   | 1.02 | 1.27 | 1.24 | 1.08 | 1.05 | 1.10 | 1.07 | 1.05 | 1.02 | 1.00 | 0.98 | 1.01 | 0.99 | 33.23  | 6.18  |
| Q3U422 | NADH dehydrogenase [ubiquinone] flavoprotein 3, mitochondrial OS=Mus musculus GN=Ndufv3 PE=2 SV=1 - [Q3U422_MOUSE] | 53.63 | 1  | 12 | 14 | 103 | 1.05 | 0.78 | 0.76 | 0.92 | 0.87 | 1.07 | 1.01 | 1.05 | 1.03 | 0.99 | 1.00 | 0.92 | 0.95 | 50.47  | 8.97  |
| F6Q5Z1 | Integrin-linked protein kinase (Fragment) OS=Mus musculus GN=Ilk PE=4 SV=1 - [F6Q5Z1_MOUSE]                        | 6.42  | 2  | 1  | 1  | 2   | 0.94 | 1.03 | 1.10 | 1.05 | 1.12 | 0.92 | 0.97 | 1.05 | 1.11 | 1.09 | 1.16 | 0.91 | 0.97 | 24.99  | 9.41  |
| Q9QZB1 | Regulator of G-protein signaling 20 OS=Mus musculus GN=Rgs20 PE=1 SV=1 - [RGS20_MOUSE]                             | 29.71 | 3  | 5  | 5  | 12  | 0.90 | 0.82 | 0.88 | 1.03 | 1.18 | 1.16 | 1.28 | 1.05 | 1.18 | 1.26 | 1.22 | 1.13 | 1.10 | 26.97  | 5.16  |
| Q9DC71 | 28S ribosomal protein S15, mitochondrial OS=Mus musculus GN=Mtpps15 PE=2 SV=2 - [RT15_MOUSE]                       | 10.47 | 1  | 3  | 3  | 4   | 0.99 | 0.72 | 0.72 | 0.94 | 1.03 | 0.97 | 0.98 | 1.05 | 1.15 | 0.98 | 1.11 | 0.85 | 0.87 | 29.45  | 10.13 |
| Q9DCV4 | Regulator of microtubule dynamics protein 1 OS=Mus musculus GN=Rmdn1 PE=2 SV=2 - [RMD1_MOUSE]                      | 8.52  | 2  | 2  | 2  | 3   | 0.90 | 1.00 | 1.11 | 1.06 | 1.18 | 0.76 | 0.84 | 1.05 | 1.16 | 0.87 | 0.97 | 0.97 | 1.08 | 34.98  | 8.70  |

|         |                                                                                                                                    |       |    |    |    |    |      |      |      |      |      |      |      |      |      |      |      |      |      |        |      |
|---------|------------------------------------------------------------------------------------------------------------------------------------|-------|----|----|----|----|------|------|------|------|------|------|------|------|------|------|------|------|------|--------|------|
| Q8BH64  | EH domain-containing protein 2 OS=Mus musculus GN=Ehd2 PE=1 SV=1 - [EHD2_MOUSE]                                                    | 5.89  | 1  | 2  | 3  | 4  | 1.00 | 0.99 | 0.99 | 0.99 | 0.99 | 0.94 | 0.94 | 1.05 | 1.05 | 1.07 | 1.07 | 1.09 | 1.09 | 61.14  | 6.51 |
| Q8K0E8  | Fibrinogen beta chain OS=Mus musculus GN=Fgb PE=2 SV=1 - [FIBB_MOUSE]                                                              | 6.03  | 2  | 2  | 3  | 6  | 0.75 | 1.09 | 1.45 | 0.62 | 0.82 | 0.73 | 0.97 | 1.05 | 1.39 | 1.32 | 1.76 | 0.84 | 1.11 | 54.72  | 7.08 |
| Q04750  | DNA topoisomerase 1 OS=Mus musculus GN=Top1 PE=1 SV=2 - [TOP1_MOUSE]                                                               | 12.13 | 1  | 9  | 9  | 15 | 0.97 | 0.94 | 0.90 | 1.10 | 1.09 | 0.99 | 1.09 | 1.05 | 1.13 | 1.04 | 1.11 | 1.00 | 1.04 | 90.82  | 9.33 |
| Q91VR8  | Protein BRICK1 OS=Mus musculus GN=Brk1 PE=2 SV=1 - [BRK1_MOUSE]                                                                    | 65.33 | 1  | 7  | 7  | 20 | 0.96 | 0.96 | 0.96 | 0.94 | 0.89 | 1.03 | 1.03 | 1.05 | 1.08 | 0.90 | 0.96 | 0.94 | 0.96 | 8.76   | 5.45 |
| Q8BYK6  | YTH domain family protein 3 OS=Mus musculus GN=Ythdf3 PE=1 SV=2 - [YTHD3_MOUSE]                                                    | 11.28 | 3  | 5  | 5  | 11 | 0.95 | 0.77 | 0.85 | 0.97 | 1.01 | 1.07 | 1.12 | 1.05 | 1.11 | 1.02 | 1.07 | 0.98 | 1.02 | 63.92  | 9.04 |
| Q3TAS6- | Isoform 2 of ER membrane protein complex subunit 10 OS=Mus musculus GN=Emc10 - [EMC10_MOUSE]                                       | 10.63 | 3  | 2  | 2  | 6  | 0.99 | 1.20 | 1.22 | 0.98 | 1.03 | 1.19 | 1.11 | 1.05 | 1.10 | 0.89 | 1.06 | 0.90 | 1.07 | 26.67  | 6.13 |
| O54949  | Serine/threonine-protein kinase NLK OS=Mus musculus GN=Nlk PE=1 SV=2 - [NLK_MOUSE]                                                 | 4.74  | 17 | 2  | 3  | 4  | 0.99 | 1.28 | 1.29 | 1.08 | 1.09 | 1.22 | 1.22 | 1.05 | 1.05 | 0.93 | 0.93 | 1.13 | 1.14 | 58.28  | 8.13 |
| Q6RHR9- | Isoform 2 of Membrane associated guanylate kinase, WW and PDZ domain-containing protein 1 OS=Mus musculus GN=Mag11 - [MAG11_MOUSE] | 24.57 | 1  | 1  | 22 | 57 | 1.12 | 1.65 | 1.47 | 0.95 | 0.85 | 1.10 | 0.98 | 1.05 | 0.93 | 1.12 | 1.01 | 1.08 | 0.97 | 127.57 | 6.16 |
| Q80TR4  | Slit homolog 1 protein OS=Mus musculus GN=Slit1 PE=1 SV=2 - [SLIT1_MOUSE]                                                          | 2.02  | 4  | 2  | 2  | 4  | 1.13 | 1.13 | 1.00 | 1.06 | 0.94 | 1.10 | 0.98 | 1.05 | 0.93 | 1.10 | 0.98 | 1.16 | 1.03 | 167.31 | 6.80 |
| P97445  | Voltage-dependent P/Q-type calcium channel subunit alpha-1A OS=Mus musculus GN=Cacna1a PE=1 SV=2 - [CAC1A_MOUSE]                   | 12.88 | 2  | 19 | 20 | 48 | 0.94 | 1.14 | 1.16 | 1.11 | 1.17 | 0.96 | 0.99 | 1.05 | 1.07 | 1.09 | 1.08 | 1.00 | 1.00 | 267.48 | 8.85 |
| Q9CQ54  | NADH dehydrogenase [ubiquinone] 1 subunit C2 OS=Mus musculus GN=Ndufc2 PE=1 SV=1 - [NDUC2_MOUSE]                                   | 28.33 | 1  | 5  | 5  | 18 | 1.10 | 1.11 | 0.99 | 1.16 | 1.26 | 1.03 | 1.04 | 1.05 | 0.98 | 0.99 | 1.00 | 1.01 | 1.08 | 14.15  | 9.20 |
| E9PUA2  | Terminal uridylyltransferase 7 OS=Mus musculus GN=Zcchc6 PE=4 SV=1 - [E9PUA2_MOUSE]                                                | 1.36  | 2  | 2  | 2  | 7  | 0.98 | 1.17 | 1.15 | 1.14 | 1.15 | 1.13 | 1.11 | 1.05 | 1.04 | 1.12 | 1.11 | 1.21 | 1.20 | 167.05 | 6.52 |

|          |                                                                                                          |       |    |    |    |     |      |      |      |      |      |      |      |      |      |      |      |      |      |        |      |
|----------|----------------------------------------------------------------------------------------------------------|-------|----|----|----|-----|------|------|------|------|------|------|------|------|------|------|------|------|------|--------|------|
| Q925T6-3 | Isoform 3 of Glutamate receptor-interacting protein 1 OS=Mus musculus GN=Grip1 - [GRIP1_MOUSE]           | 5.13  | 13 | 4  | 4  | 7   | 0.98 | 0.91 | 0.85 | 1.12 | 1.11 | 0.96 | 0.98 | 1.05 | 1.06 | 1.04 | 0.98 | 0.92 | 0.95 | 111.31 | 6.00 |
| Q80U9    | Membrane-associated progesterone receptor component 2 OS=Mus musculus GN=Pgrmc2 PE=1 SV=2 - [PGR2_MOUSE] | 64.52 | 1  | 10 | 12 | 30  | 1.08 | 1.15 | 0.95 | 1.11 | 0.99 | 1.08 | 0.98 | 1.05 | 0.98 | 1.08 | 1.00 | 1.01 | 0.97 | 23.32  | 5.15 |
| Q8BG76   | MICAL-like protein 1 OS=Mus musculus GN=Micall1 PE=1 SV=3 - [MILK1_MOUSE]                                | 17.36 | 3  | 13 | 13 | 34  | 0.92 | 0.80 | 0.81 | 0.83 | 0.93 | 1.07 | 1.12 | 1.05 | 1.10 | 0.95 | 1.09 | 0.94 | 1.01 | 94.02  | 6.68 |
| Q3UCV8   | Ubiquitin thioesterase outlin OS=Mus musculus GN=Fam105b PE=1 SV=1 - [OTUL_MOUSE]                        | 1.99  | 1  | 1  | 1  | 1   | 0.98 | 1.06 | 1.08 | 1.01 | 1.03 | 1.05 | 1.07 | 1.05 | 1.07 | 1.09 | 1.12 | 1.04 | 1.07 | 40.29  | 5.68 |
| D3YYY8   | Protein Arhgef26 OS=Mus musculus GN=Arhgef26 PE=4 SV=1 - [D3YYY8_MOUSE]                                  | 0.81  | 1  | 1  | 1  | 1   | 1.22 | 1.31 | 1.08 | 0.93 | 0.76 | 0.93 | 0.76 | 1.05 | 0.86 | 0.98 | 0.81 | 0.98 | 0.81 | 97.33  | 8.72 |
| E0CXZ1   | FSD1-like protein (Fragment) OS=Mus musculus GN=Fsd11 PE=2 SV=2 - [E0CXZ1_MOUSE]                         | 17.44 | 6  | 5  | 5  | 15  | 0.92 | 1.12 | 1.14 | 0.98 | 1.04 | 1.02 | 1.11 | 1.05 | 1.11 | 1.03 | 1.11 | 1.13 | 1.24 | 55.30  | 6.25 |
| Q78J03   | Methionine-R-sulfoxide reductase B2, mitochondrial OS=Mus musculus GN=MsrB2 PE=1 SV=1 - [MSRB2_MOUSE]    | 48.00 | 1  | 8  | 8  | 35  | 0.97 | 0.90 | 0.92 | 0.94 | 0.98 | 1.11 | 1.18 | 1.05 | 1.09 | 0.95 | 1.06 | 0.91 | 0.98 | 19.14  | 9.06 |
| Q8C2K1   | Differentially expressed in FDCP 6 OS=Mus musculus GN=Def6 PE=1 SV=1 - [DEF6_MOUSE]                      | 6.67  | 2  | 3  | 4  | 9   | 0.94 | 0.93 | 0.98 | 0.91 | 0.96 | 0.98 | 1.05 | 1.05 | 1.08 | 0.89 | 1.05 | 0.86 | 0.83 | 73.41  | 6.27 |
| Q811P8   | Rho GTPase-activating protein 32 OS=Mus musculus GN=Arhgap32 PE=1 SV=2 - [RHG32_MOUSE]                   | 27.33 | 5  | 33 | 35 | 127 | 0.97 | 1.01 | 1.02 | 1.00 | 1.03 | 1.04 | 1.04 | 1.05 | 1.08 | 1.00 | 1.03 | 0.98 | 0.98 | 229.58 | 6.86 |
| A2AQ19   | RNA polymerase-associated protein RTF1 homolog OS=Mus musculus GN=Rtf1 PE=2 SV=1 - [RTF1_MOUSE]          | 15.38 | 1  | 11 | 11 | 17  | 0.98 | 0.90 | 0.86 | 0.94 | 0.95 | 1.08 | 1.09 | 1.05 | 1.09 | 1.02 | 1.09 | 0.94 | 0.93 | 80.75  | 8.16 |
| D3Z6S7   | Immunoglobulin superfamily member 11 OS=Mus musculus GN=Igsf11 PE=4 SV=1 - [D3Z6S7_MOUSE]                | 3.52  | 2  | 1  | 1  | 2   | 1.14 | 1.19 | 1.04 | 1.31 | 1.14 | 1.19 | 1.03 | 1.05 | 0.91 | 1.20 | 1.05 | 1.31 | 1.15 | 39.88  | 7.17 |



|          |                                                                                                                            |       |   |   |   |    |      |      |      |      |      |      |      |      |      |      |      |      |      |        |      |
|----------|----------------------------------------------------------------------------------------------------------------------------|-------|---|---|---|----|------|------|------|------|------|------|------|------|------|------|------|------|------|--------|------|
| Q62141-2 | Isoform 2 of Paired amphipathic helix protein Sin3b OS=Mus musculus GN=Sin3b - [SIN3B_MOUSE]                               | 3.75  | 4 | 1 | 1 | 2  | 1.09 | 1.39 | 1.27 | 0.88 | 0.81 | 1.10 | 1.00 | 1.05 | 0.96 | 1.08 | 0.99 | 1.16 | 1.06 | 32.83  | 7.09 |
| Q8BGB7   | Enolase-phosphatase E1 OS=Mus musculus GN=Enoph1 PE=2 SV=1 - [ENOPH_MOUSE]                                                 | 10.89 | 2 | 2 | 2 | 11 | 1.01 | 0.95 | 0.95 | 1.12 | 1.11 | 1.12 | 1.00 | 1.05 | 1.09 | 1.00 | 1.02 | 1.17 | 1.10 | 28.58  | 4.92 |
| G3X9U9   | Fission 1 (Mitochondrial outer membrane) homolog (Yeast), isoform CRA_c OS=Mus musculus GN=Fis1 PE=4 SV=1 - [G3X9U9_MOUSE] | 26.21 | 3 | 3 | 3 | 6  | 0.90 | 0.88 | 0.94 | 1.01 | 1.08 | 1.01 | 1.13 | 1.05 | 1.11 | 0.99 | 1.05 | 1.03 | 1.14 | 16.25  | 9.25 |
| Q9WTM5   | RuvB-like 2 OS=Mus musculus GN=Ruvb12 PE=2 SV=3 - [RUVB2_MOUSE]                                                            | 16.63 | 2 | 6 | 6 | 13 | 0.95 | 1.09 | 1.16 | 1.13 | 1.09 | 0.87 | 0.90 | 1.05 | 1.00 | 1.07 | 1.11 | 1.16 | 1.16 | 51.08  | 5.64 |
| Q8VCF1-  | Isoform 2 of Soluble calcium-activated nucleotidase 1 OS=Mus musculus GN=Cant1 - [CANT1_MOUSE]                             | 5.61  | 3 | 1 | 1 | 1  | 0.85 | 1.12 | 1.32 | 0.92 | 1.09 | 1.02 | 1.20 | 1.05 | 1.23 | 1.09 | 1.29 | 1.09 | 1.29 | 24.17  | 8.38 |
| P47753   | F-actin-capping protein subunit alpha-1 OS=Mus musculus GN=Capza1 PE=1 SV=4 - [CAZA1_MOUSE]                                | 42.31 | 2 | 5 | 7 | 27 | 1.06 | 1.04 | 0.99 | 1.05 | 0.95 | 0.99 | 1.02 | 1.05 | 0.97 | 1.17 | 1.14 | 1.11 | 1.03 | 32.92  | 5.55 |
| E9PZ58   | Spermine synthase OS=Mus musculus GN=Sms PE=2 SV=1 - [E9PZ58_MOUSE]                                                        | 27.91 | 3 | 6 | 6 | 9  | 1.03 | 0.97 | 1.01 | 1.08 | 1.01 | 1.01 | 1.07 | 1.05 | 1.09 | 0.95 | 1.06 | 1.08 | 1.12 | 28.64  | 5.30 |
| P35822   | Receptor-type tyrosine-protein phosphatase kappa OS=Mus musculus GN=Ptpkr PE=1 SV=1 - [PTRPK_MOUSE]                        | 7.89  | 1 | 7 | 8 | 17 | 0.96 | 0.99 | 1.05 | 0.89 | 0.95 | 1.06 | 1.06 | 1.05 | 1.10 | 0.91 | 1.08 | 0.89 | 1.00 | 164.08 | 5.95 |
| Q9DA97   | Septin-14 OS=Mus musculus GN=Sept14 PE=2 SV=3 - [SEP14_MOUSE]                                                              | 8.14  | 1 | 1 | 2 | 8  | 0.96 | 0.69 | 0.71 | 0.91 | 0.94 | 1.09 | 1.12 | 1.05 | 1.08 | 0.95 | 0.99 | 0.77 | 0.80 | 49.78  | 7.27 |
| Q99JX7   | Nuclear RNA export factor 1 OS=Mus musculus GN=Nxf1 PE=1 SV=3 - [NXF1_MOUSE]                                               | 5.99  | 1 | 3 | 3 | 6  | 0.91 | 0.94 | 1.14 | 0.87 | 0.96 | 0.94 | 1.06 | 1.05 | 1.15 | 0.91 | 1.08 | 0.97 | 1.13 | 70.26  | 8.73 |
| Q9D6K5   | Synaptojanin-2-binding protein OS=Mus musculus GN=Synj2bp PE=1 SV=1 - [SYJ2B_MOUSE]                                        | 30.34 | 6 | 4 | 4 | 11 | 0.92 | 1.26 | 1.27 | 1.07 | 1.04 | 1.00 | 1.11 | 1.05 | 1.05 | 1.03 | 1.10 | 1.21 | 1.19 | 15.81  | 6.30 |
| G3UW40   | MCG4620, isoform CRA_b OS=Mus musculus GN=Mcc PE=4 SV=1 - [G3UW40_MOUSE]                                                   | 11.71 | 2 | 7 | 7 | 14 | 0.93 | 0.78 | 0.84 | 0.83 | 0.88 | 0.99 | 1.04 | 1.05 | 1.07 | 0.85 | 0.93 | 0.84 | 0.85 | 92.76  | 5.48 |

|          |                                                                                                           |       |   |    |    |     |      |      |      |      |      |      |      |      |      |      |      |      |      |        |       |
|----------|-----------------------------------------------------------------------------------------------------------|-------|---|----|----|-----|------|------|------|------|------|------|------|------|------|------|------|------|------|--------|-------|
| Q8VED9   | Galectin-related protein OS=Mus musculus GN=Lgals1 PE=1 SV=1 - [LEGL_MOUSE]                               | 59.30 | 2 | 8  | 8  | 51  | 0.94 | 0.96 | 1.01 | 1.01 | 1.04 | 0.96 | 0.99 | 1.05 | 1.10 | 0.94 | 0.99 | 0.98 | 1.04 | 18.94  | 5.35  |
| P70444   | BH3-interacting domain death agonist OS=Mus musculus GN=Bid PE=1 SV=2 - [BID_MOUSE]                       | 31.28 | 2 | 4  | 4  | 14  | 1.12 | 1.06 | 0.95 | 0.95 | 0.90 | 1.12 | 1.06 | 1.05 | 0.93 | 1.06 | 0.98 | 1.10 | 1.00 | 21.94  | 4.81  |
| Q8K1J6   | CCA tRNA nucleotidyltransferase 1, mitochondrial OS=Mus musculus GN=Trnt1 PE=2 SV=1 - [TRNT1_MOUSE]       | 12.67 | 2 | 4  | 4  | 7   | 1.03 | 1.22 | 1.12 | 1.10 | 1.05 | 1.02 | 0.98 | 1.05 | 1.05 | 0.91 | 0.91 | 1.00 | 0.96 | 49.86  | 8.56  |
| P61264   | Syntaxin-1B OS=Mus musculus GN=Stx1b PE=1 SV=1 - [STX1B_MOUSE]                                            | 60.42 | 1 | 18 | 19 | 507 | 1.06 | 0.99 | 0.96 | 0.97 | 0.92 | 1.11 | 1.05 | 1.05 | 1.02 | 1.02 | 0.95 | 0.96 | 0.90 | 33.22  | 5.38  |
| P47746   | Cannabinoid receptor 1 OS=Mus musculus GN=Cnr1 PE=2 SV=1 - [CNR1_MOUSE]                                   | 6.77  | 1 | 2  | 2  | 3   | 1.01 | 0.89 | 0.88 | 1.00 | 0.99 | 1.00 | 1.03 | 1.05 | 1.02 | 0.99 | 1.03 | 0.96 | 0.90 | 52.80  | 8.27  |
| P00920   | Carbonic anhydrase 2 OS=Mus musculus GN=Ca2 PE=1 SV=4 - [CAH2_MOUSE]                                      | 66.15 | 1 | 15 | 15 | 239 | 0.86 | 0.90 | 1.05 | 0.97 | 1.12 | 1.04 | 1.21 | 1.05 | 1.17 | 1.04 | 1.19 | 0.96 | 1.16 | 29.01  | 7.01  |
| Q3UZP4   | Small VCP/p97-interacting protein OS=Mus musculus GN=Svip PE=2 SV=1 - [SVIP_MOUSE]                        | 14.29 | 1 | 1  | 1  | 3   | 1.02 | 0.70 | 0.69 | 0.81 | 0.79 | 1.11 | 1.09 | 1.05 | 1.03 | 0.63 | 0.62 | 0.96 | 0.95 | 8.36   | 8.91  |
| D3YU12   | NmrA-like family domain-containing protein 1 OS=Mus musculus GN=NmrA1 PE=2 SV=1 - [D3YU12_MOUSE]          | 21.74 | 5 | 6  | 6  | 12  | 1.05 | 0.99 | 0.95 | 1.01 | 0.89 | 1.10 | 1.04 | 1.05 | 1.00 | 1.04 | 0.98 | 1.13 | 1.05 | 33.06  | 6.80  |
| O35188   | Fractalkine OS=Mus musculus GN=Cx3cl1 PE=2 SV=3 - [X3CL1_MOUSE]                                           | 9.11  | 1 | 3  | 3  | 21  | 1.02 | 1.03 | 1.03 | 0.99 | 0.94 | 1.09 | 1.02 | 1.05 | 1.04 | 1.10 | 1.05 | 0.98 | 1.03 | 42.07  | 5.54  |
| Q80X13-2 | Isoform 2 of Eukaryotic translation initiation factor 4 gamma 3 OS=Mus musculus GN=Eif4g3 - [IF4G3_MOUSE] | 24.36 | 9 | 26 | 29 | 68  | 0.96 | 1.07 | 1.02 | 0.97 | 0.99 | 1.06 | 1.10 | 1.05 | 1.11 | 1.02 | 1.08 | 0.97 | 1.03 | 172.76 | 5.50  |
| P62806   | Histone H4 OS=Mus musculus GN=H1b4a PE=1 SV=2 - [H4_MOUSE]                                                | 54.37 | 1 | 9  | 9  | 118 | 1.06 | 0.99 | 0.92 | 1.08 | 1.00 | 1.01 | 0.94 | 1.05 | 1.00 | 1.07 | 0.99 | 1.07 | 0.98 | 11.36  | 11.36 |
| Q8BV13   | COP9 signalosome complex subunit 7b OS=Mus musculus GN=Cops7b PE=1 SV=1 - [CSN7B_MOUSE]                   | 25.76 | 1 | 5  | 5  | 10  | 1.07 | 0.95 | 1.00 | 0.99 | 1.01 | 1.07 | 1.00 | 1.05 | 1.02 | 1.12 | 1.08 | 0.97 | 0.88 | 29.67  | 6.32  |

|          |                                                                                                                               |       |    |    |    |     |      |      |      |      |      |      |      |      |      |      |      |      |      |        |       |
|----------|-------------------------------------------------------------------------------------------------------------------------------|-------|----|----|----|-----|------|------|------|------|------|------|------|------|------|------|------|------|------|--------|-------|
| Q63810-2 | Isoform 2 of Calcineurin subunit B type 1 OS=Mus musculus GN=Ppp3r1 - [CANB1_MOUSE]                                           | 77.50 | 3  | 15 | 15 | 549 | 1.08 | 0.78 | 0.85 | 0.91 | 0.88 | 1.10 | 1.03 | 1.05 | 0.99 | 0.92 | 0.89 | 0.91 | 0.92 | 18.20  | 4.92  |
| Q9CR59   | Growth arrest and DNA damage-inducible proteins-interacting protein 1 OS=Mus musculus GN=Gadd45gip1 PE=2 SV=1 - [G45IP_MOUSE] | 32.88 | 1  | 6  | 6  | 16  | 1.03 | 0.99 | 1.04 | 1.03 | 1.10 | 1.16 | 1.14 | 1.05 | 1.13 | 1.17 | 1.17 | 1.26 | 1.17 | 25.80  | 10.27 |
| Q8BX09-2 | Isoform 2 of Retinoblastoma-binding protein 5 OS=Mus musculus GN=Rbbp5 - [RBBP5_MOUSE]                                        | 16.62 | 1  | 1  | 4  | 9   | 1.34 | 0.89 | 0.66 | 0.92 | 0.68 | 0.71 | 0.53 | 1.05 | 0.78 | 0.73 | 0.54 | 0.78 | 0.59 | 40.74  | 4.83  |
| Q6ZQM0   | Isoform 4 of E3 ubiquitin-protein ligase rififylin OS=Mus musculus GN=Rfl - [RFFL_MOUSE]                                      | 6.48  | 5  | 1  | 1  | 5   | 0.94 | 1.13 | 1.20 | 0.93 | 0.99 | 1.10 | 1.17 | 1.05 | 1.12 | 1.00 | 1.07 | 1.17 | 1.25 | 33.04  | 5.83  |
| Q78ZM0   | Sorting nexin 3 OS=Mus musculus GN=Snx3 PE=2 SV=1 - [Q78ZM0_MOUSE]                                                            | 41.98 | 4  | 7  | 8  | 38  | 0.96 | 0.89 | 0.95 | 0.96 | 0.95 | 1.00 | 1.01 | 1.05 | 1.08 | 0.93 | 1.01 | 0.93 | 1.06 | 18.75  | 8.66  |
| Q8BX94   | Oxysterol-binding protein-related protein 2 OS=Mus musculus GN=Osbl2 PE=2 SV=1 - [OSBL2_MOUSE]                                | 3.72  | 1  | 1  | 2  | 3   | 0.97 | 2.68 | 2.76 | 1.03 | 1.07 | 0.89 | 0.92 | 1.05 | 1.08 | 1.07 | 1.10 | 1.00 | 1.04 | 55.35  | 6.20  |
| Q9CPW9   | Isoform 2 of Methionine aminopeptidase 1D, mitochondrial OS=Mus musculus GN=Metap1d - [MAP12_MOUSE]                           | 6.45  | 2  | 1  | 1  | 2   | 0.94 | 1.41 | 1.49 | 0.93 | 0.98 | 1.16 | 1.22 | 1.05 | 1.11 | 1.04 | 1.10 | 0.98 | 1.04 | 24.04  | 5.26  |
| O88291   | DBIRD complex subunit ZNF326 OS=Mus musculus GN=Znf326 PE=1 SV=1 - [ZNF326_MOUSE]                                             | 17.41 | 5  | 8  | 8  | 48  | 1.00 | 0.92 | 0.90 | 0.89 | 0.87 | 1.03 | 1.10 | 1.05 | 0.99 | 1.03 | 0.93 | 1.01 | 0.97 | 65.18  | 5.19  |
| D3Z7V3   | Sarcolemmal membrane-associated protein OS=Mus musculus GN=Slmap PE=2 SV=1 - [D3Z7V3_MOUSE]                                   | 24.56 | 13 | 16 | 16 | 29  | 1.00 | 0.94 | 1.04 | 1.04 | 1.06 | 1.07 | 1.11 | 1.05 | 1.13 | 1.06 | 1.19 | 1.01 | 1.12 | 90.67  | 5.25  |
| Q3UHC7   | Isoform 2 of Disabled homolog 2-interacting protein OS=Mus musculus GN=Dab2ip - [DAB2IP_MOUSE]                                | 15.77 | 12 | 11 | 14 | 33  | 0.98 | 1.14 | 1.01 | 1.10 | 1.03 | 1.01 | 0.92 | 1.05 | 1.09 | 1.00 | 1.00 | 1.04 | 1.03 | 117.58 | 6.79  |
| Q7M6Y3   | Isoform 5 of Phosphatidylinositol-binding clathrin assembly protein OS=Mus musculus GN=Picalm - [PICAL_MOUSE]                 | 23.51 | 3  | 1  | 10 | 43  | 1.06 | 0.65 | 0.59 | 1.09 | 1.04 | 1.06 | 0.88 | 1.05 | 0.98 | 1.00 | 1.04 | 0.84 | 0.79 | 70.94  | 8.37  |
| Q8CCX5   | Isoform 2 of Keratin-like protein KRT222 OS=Mus musculus GN=Krt222 - [KRT222_MOUSE]                                           | 18.11 | 2  | 2  | 3  | 9   | 0.84 | 1.00 | 1.18 | 1.02 | 0.98 | 1.21 | 1.42 | 1.05 | 1.24 | 0.87 | 1.04 | 1.00 | 1.25 | 29.42  | 6.07  |

|        |                                                                                                                              |       |   |    |    |    |      |      |      |      |      |      |      |      |      |      |      |      |      |        |       |
|--------|------------------------------------------------------------------------------------------------------------------------------|-------|---|----|----|----|------|------|------|------|------|------|------|------|------|------|------|------|------|--------|-------|
| Q9QY15 | Dnaj homolog subfamily B member 2<br>OS=Mus musculus<br>GN=Dnajb2 PE=2<br>SV=2 -<br>[DNJB2_MOUSE]                            | 36.10 | 2 | 8  | 9  | 32 | 1.09 | 1.02 | 0.91 | 1.00 | 0.91 | 1.05 | 0.94 | 1.05 | 0.97 | 0.98 | 0.91 | 1.04 | 0.98 | 30.60  | 4.98  |
| Q8BGQ1 | Spermatogenesis-defective protein 39 homolog<br>OS=Mus musculus<br>GN=Vipas39<br>PE=1 SV=1 -<br>[SPE39_MOUSE]                | 18.74 | 2 | 8  | 8  | 14 | 1.11 | 1.03 | 0.90 | 1.07 | 0.99 | 1.14 | 1.07 | 1.05 | 0.97 | 1.02 | 0.94 | 1.07 | 0.99 | 56.59  | 7.17  |
| P59672 | Ankyrin repeat and SAM domain-containing protein 1A<br>OS=Mus musculus<br>GN=Anks1a PE=1<br>SV=3 -<br>[ANS1A_MOUSE]          | 0.87  | 3 | 1  | 1  | 2  | 0.95 | 1.03 | 1.08 | 0.96 | 1.02 | 1.08 | 1.14 | 1.05 | 1.11 | 0.91 | 0.97 | 0.91 | 0.96 | 125.16 | 6.05  |
| Q80VD1 | Protein FAM98B<br>OS=Mus musculus<br>GN=Fam98b PE=2<br>SV=1 -<br>[FA98B_MOUSE]                                               | 19.58 | 1 | 5  | 6  | 14 | 1.06 | 1.01 | 0.92 | 1.02 | 0.99 | 1.10 | 1.09 | 1.05 | 1.04 | 1.07 | 1.07 | 1.09 | 1.02 | 45.32  | 8.50  |
| Q3UM45 | Protein phosphatase 1 regulatory subunit 7<br>OS=Mus musculus<br>GN=Ppp1r7 PE=1<br>SV=2 -<br>[PP1R7_MOUSE]                   | 54.85 | 2 | 18 | 18 | 75 | 0.91 | 0.88 | 1.02 | 0.90 | 0.99 | 0.98 | 1.10 | 1.05 | 1.14 | 0.96 | 1.10 | 0.99 | 1.11 | 41.27  | 4.92  |
| Q91WS0 | CDGSH iron-sulfur domain-containing protein 1<br>OS=Mus musculus<br>GN=Cisd1<br>PE=1 SV=1 -<br>[CISD1_MOUSE]                 | 64.81 | 1 | 6  | 6  | 63 | 1.00 | 0.91 | 0.91 | 1.13 | 1.13 | 1.05 | 1.08 | 1.05 | 1.06 | 1.11 | 1.11 | 0.99 | 1.01 | 12.09  | 9.06  |
| F6Y6Q2 | Phosphoethanolamine/phosphocholine phosphatase (Fragment)<br>OS=Mus musculus<br>GN=Phospho1 PE=2<br>SV=1 -<br>[F6Y6Q2_MOUSE] | 25.53 | 2 | 1  | 1  | 2  | 0.97 | 0.86 | 0.88 | 0.98 | 1.00 | 1.06 | 1.09 | 1.05 | 1.08 | 1.10 | 1.13 | 0.92 | 0.95 | 5.21   | 4.34  |
| Q9JHK4 | Geranylgeranyl transferase type-2 subunit alpha<br>OS=Mus musculus<br>GN=Rabggt2 PE=1<br>SV=1 -<br>[PGTA_MOUSE]              | 26.63 | 2 | 11 | 11 | 17 | 1.01 | 1.06 | 0.98 | 1.15 | 1.12 | 0.86 | 0.87 | 1.05 | 0.90 | 0.98 | 0.99 | 1.26 | 1.07 | 64.95  | 5.80  |
| Q5U4C1 | G-protein coupled receptor-associated sorting protein 1<br>OS=Mus musculus<br>GN=Gprasp1 PE=2<br>SV=1 -<br>[GASP1_MOUSE]     | 9.58  | 2 | 9  | 9  | 14 | 1.11 | 1.07 | 0.98 | 1.09 | 0.91 | 1.15 | 0.96 | 1.05 | 0.92 | 1.12 | 0.93 | 1.12 | 0.94 | 151.65 | 5.08  |
| E9PVP5 | Molybdopterin synthase catalytic subunit<br>OS=Mus musculus<br>GN=Mocs2<br>PE=2 SV=1 -<br>[E9PVP5_MOUSE]                     | 9.55  | 3 | 1  | 1  | 2  | 1.29 | 0.74 | 0.57 | 1.06 | 0.82 | 0.86 | 0.66 | 1.05 | 0.81 | 0.88 | 0.69 | 0.88 | 0.68 | 17.10  | 4.96  |
| A2AJT4 | Arginine/serine-rich protein PNISR<br>OS=Mus musculus<br>GN=Pnizr PE=1 SV=1<br>[PNISR_MOUSE]                                 | 6.71  | 6 | 4  | 5  | 6  | 1.06 | 0.90 | 0.80 | 0.94 | 0.94 | 0.96 | 0.92 | 1.05 | 0.99 | 0.97 | 0.90 | 0.94 | 0.83 | 92.06  | 10.01 |

|         |                                                                                                              |       |   |    |    |     |      |      |      |      |      |      |      |      |      |      |      |      |      |        |      |
|---------|--------------------------------------------------------------------------------------------------------------|-------|---|----|----|-----|------|------|------|------|------|------|------|------|------|------|------|------|------|--------|------|
| Q8VCC9  | Spondin-1 OS=Mus musculus GN=Spon1 PE=2 SV=1 - [SPON1_MOUSE]                                                 | 11.77 | 2 | 8  | 8  | 14  | 1.11 | 1.00 | 0.88 | 1.02 | 0.93 | 0.98 | 0.92 | 1.05 | 0.93 | 1.06 | 0.99 | 1.04 | 0.98 | 90.76  | 6.02 |
| Q5DTM8  | E3 ubiquitin-protein ligase BRE1A OS=Mus musculus GN=Rnf20 PE=1 SV=2 - [BRE1A_MOUSE]                         | 17.47 | 5 | 15 | 15 | 35  | 1.02 | 1.02 | 1.00 | 0.88 | 0.90 | 0.94 | 0.97 | 1.05 | 1.04 | 0.83 | 0.86 | 0.95 | 0.95 | 113.45 | 5.96 |
| Q8K482  | EMILIN-2 OS=Mus musculus GN=Emilin2 PE=1 SV=1 - [EMIL2_MOUSE]                                                | 0.65  | 1 | 1  | 1  | 1   | 1.22 | 1.19 | 0.97 | 0.94 | 0.76 | 1.35 | 1.10 | 1.05 | 0.86 | 1.26 | 1.04 | 1.11 | 0.91 | 117.24 | 5.62 |
| Q61285  | ATP-binding cassette sub-family D member 2 OS=Mus musculus GN=Abcd2 PE=1 SV=1 - [ABCD2_MOUSE]                | 3.37  | 1 | 2  | 2  | 3   | 0.93 | 1.19 | 1.28 | 0.98 | 1.05 | 0.98 | 1.05 | 1.05 | 1.13 | 0.88 | 0.95 | 1.01 | 1.09 | 83.43  | 9.09 |
| Q8CD60  | UPF0583 protein C15orf59 homolog OS=Mus musculus PE=2 SV=1 - [CO059_MOUSE]                                   | 7.88  | 1 | 2  | 2  | 4   | 0.98 | 0.87 | 0.89 | 0.91 | 0.94 | 1.07 | 1.09 | 1.05 | 1.08 | 0.99 | 1.01 | 1.00 | 1.02 | 31.79  | 4.87 |
| Q9DA19- | Isoform 2 of Corepressor interacting with RBPJ 1 OS=Mus musculus GN=Cir1 - [CIR1_MOUSE]                      | 25.47 | 2 | 2  | 2  | 4   | 1.01 | 0.75 | 0.74 | 0.99 | 0.98 | 1.00 | 0.99 | 1.05 | 1.04 | 0.98 | 0.97 | 0.89 | 0.88 | 12.66  | 8.50 |
| Q9CRA9- | Isoform 2 of FGFR1 oncogene partner 2 homolog OS=Mus musculus GN=Fgfr1op2 - [FGOP2_MOUSE]                    | 43.26 | 3 | 9  | 9  | 25  | 0.91 | 0.96 | 1.12 | 0.86 | 0.97 | 1.01 | 1.11 | 1.05 | 1.22 | 1.01 | 1.08 | 0.93 | 1.06 | 24.93  | 5.57 |
| E9QB01  | Neural cell adhesion molecule 1 OS=Mus musculus GN=Ncam1 PE=2 SV=1 - [E9QB01_MOUSE]                          | 47.41 | 5 | 2  | 34 | 404 | 0.93 | 0.95 | 1.28 | 0.88 | 0.97 | 0.92 | 1.08 | 1.05 | 1.22 | 1.06 | 1.29 | 0.95 | 1.03 | 93.43  | 4.91 |
| Q7TSG2  | RNA polymerase II subunit A C-terminal domain phosphatase OS=Mus musculus GN=Ctdp1 PE=1 SV=1 - [CTDP1_MOUSE] | 6.77  | 3 | 4  | 4  | 7   | 0.87 | 0.93 | 1.10 | 0.95 | 1.08 | 1.19 | 1.35 | 1.05 | 1.24 | 1.11 | 1.24 | 1.13 | 1.27 | 104.49 | 5.39 |
| Q5DTT2  | PH and SEC7 domain-containing protein 1 OS=Mus musculus GN=Psd PE=1 SV=2 - [PSD1_MOUSE]                      | 7.81  | 2 | 3  | 7  | 11  | 1.10 | 1.15 | 0.81 | 1.20 | 1.11 | 1.01 | 0.94 | 1.05 | 0.95 | 0.84 | 0.87 | 1.07 | 0.85 | 109.62 | 7.05 |
| Q91YJ3  | Thymocyte nuclear protein 1 OS=Mus musculus GN=Thyn1 PE=1 SV=1 - [THYN1_MOUSE]                               | 38.05 | 1 | 8  | 8  | 11  | 0.98 | 0.80 | 0.84 | 0.93 | 0.98 | 1.09 | 1.11 | 1.05 | 1.08 | 1.03 | 1.05 | 1.05 | 1.15 | 26.16  | 9.11 |
| Q8CHP5- | Isoform 2 of Partner of Y14 and mago OS=Mus musculus GN=Wibg - [WIBG_MOUSE]                                  | 56.44 | 2 | 6  | 6  | 18  | 1.05 | 0.99 | 0.92 | 1.00 | 0.97 | 1.20 | 1.04 | 1.05 | 1.02 | 1.00 | 0.97 | 1.01 | 0.95 | 22.67  | 9.48 |

|        |                                                                                                              |       |   |    |    |     |      |      |      |      |      |      |      |      |      |      |      |      |      |        |      |
|--------|--------------------------------------------------------------------------------------------------------------|-------|---|----|----|-----|------|------|------|------|------|------|------|------|------|------|------|------|------|--------|------|
| P61406 | Telomerase-binding protein EST1A<br>OS=Mus musculus<br>GN=Smg6 PE=2 SV=1<br>-[EST1A_MOUSE]                   | 0.92  | 1 | 1  | 1  | 2   | 0.91 | 0.95 | 1.04 | 0.88 | 0.96 | 1.10 | 1.19 | 1.05 | 1.15 | 0.96 | 1.05 | 0.91 | 1.00 | 160.40 | 6.77 |
| A2AHC3 | Calmodulin-regulated spectrin-associated protein 1 OS=Mus musculus<br>GN=Camsap1 PE=1 SV=1<br>-[CAMP1_MOUSE] | 20.18 | 6 | 21 | 21 | 39  | 1.01 | 0.93 | 1.01 | 1.03 | 1.00 | 1.07 | 1.10 | 1.05 | 1.04 | 1.07 | 1.07 | 1.00 | 0.98 | 175.78 | 6.95 |
| P63239 | Neuroendocrine convertase 1 OS=Mus musculus<br>GN=Pesk1 PE=1 SV=1<br>-[NEC1_MOUSE]                           | 4.78  | 1 | 3  | 3  | 12  | 1.23 | 0.80 | 0.67 | 0.96 | 0.77 | 1.18 | 0.98 | 1.05 | 0.86 | 1.15 | 0.93 | 1.08 | 0.90 | 84.12  | 6.43 |
| Q9DC22 | DDB1- and CUL4-associated factor 6 OS=Mus musculus<br>GN=Dcaf6 PE=1 SV=1<br>-[DCAF6_MOUSE]                   | 5.59  | 1 | 4  | 4  | 7   | 0.89 | 1.17 | 1.27 | 1.06 | 1.15 | 0.99 | 1.14 | 1.05 | 1.14 | 0.99 | 1.17 | 1.05 | 1.14 | 97.53  | 5.22 |
| Q8VEK3 | Heterogeneous nuclear ribonucleoprotein U OS=Mus musculus<br>GN=Hnmpu PE=1 SV=1<br>-[HNRPU_MOUSE]            | 30.00 | 2 | 17 | 17 | 111 | 0.90 | 0.99 | 1.08 | 0.99 | 1.07 | 1.06 | 1.13 | 1.05 | 1.14 | 1.00 | 1.09 | 1.01 | 1.13 | 87.86  | 6.24 |
| Q8BFU3 | RING finger protein 214 OS=Mus musculus<br>GN=Rnf214 PE=2 SV=1<br>-[RN214_MOUSE]                             | 45.21 | 6 | 25 | 26 | 83  | 1.01 | 0.91 | 0.89 | 0.92 | 0.90 | 0.96 | 0.94 | 1.05 | 0.96 | 0.93 | 0.90 | 0.93 | 0.89 | 73.58  | 6.23 |
| Q9D024 | Coiled-coil domain-containing protein 47 OS=Mus musculus<br>GN=Ccdc47 PE=2 SV=2<br>-[CCD47_MOUSE]            | 25.88 | 5 | 11 | 11 | 25  | 1.04 | 0.94 | 0.91 | 0.99 | 0.93 | 1.08 | 0.98 | 1.05 | 0.97 | 1.02 | 0.96 | 1.01 | 0.96 | 55.81  | 4.84 |
| P83870 | PHD finger-like domain-containing protein 5A OS=Mus musculus<br>GN=Phf5a PE=1 SV=1<br>-[PHF5A_MOUSE]         | 49.09 | 1 | 5  | 5  | 11  | 1.01 | 0.92 | 0.91 | 0.88 | 0.95 | 1.07 | 1.03 | 1.05 | 1.08 | 0.91 | 0.93 | 0.99 | 1.01 | 12.40  | 8.41 |
| Q8BVI5 | Syntaxin-16 OS=Mus musculus<br>GN=Stx16 PE=1 SV=3<br>-[STX16_MOUSE]                                          | 33.74 | 6 | 8  | 8  | 15  | 1.03 | 1.14 | 1.08 | 1.07 | 1.09 | 0.93 | 0.96 | 1.05 | 1.00 | 1.04 | 1.05 | 1.01 | 1.05 | 37.06  | 5.86 |
| A2AWF8 | Receptor-type tyrosine-protein phosphatase eta OS=Mus musculus<br>GN=Ptpj PE=2 SV=1<br>-[A2AWF8_MOUSE]       | 4.55  | 4 | 4  | 4  | 7   | 1.12 | 0.92 | 0.97 | 1.00 | 1.01 | 1.04 | 0.95 | 1.05 | 0.93 | 1.07 | 0.96 | 0.92 | 0.89 | 128.63 | 5.39 |
| Q80XQ2 | TBC1 domain family member 5 OS=Mus musculus<br>GN=Tbc1d5 PE=1 SV=2<br>-[TBCD5_MOUSE]                         | 10.06 | 1 | 6  | 6  | 11  | 1.04 | 0.85 | 1.04 | 1.04 | 1.04 | 0.98 | 1.04 | 1.05 | 1.02 | 0.98 | 1.03 | 1.00 | 1.06 | 91.78  | 6.79 |
| P52800 | Ephrin-B2 OS=Mus musculus<br>GN=Efnb2 PE=1 SV=1<br>-[EFNB2_MOUSE]                                            | 28.87 | 3 | 6  | 6  | 17  | 1.05 | 0.95 | 0.98 | 1.03 | 0.96 | 1.09 | 1.03 | 1.05 | 1.01 | 1.01 | 1.00 | 1.04 | 0.98 | 37.18  | 8.97 |

|        |                                                                                                          |       |    |    |    |     |      |      |      |      |      |      |      |      |      |      |      |      |      |        |       |
|--------|----------------------------------------------------------------------------------------------------------|-------|----|----|----|-----|------|------|------|------|------|------|------|------|------|------|------|------|------|--------|-------|
| Q80TR0 | MKIAA0827 protein (Fragment) OS=Mus musculus GN=Nfat5 PE=2 SV=1 - [Q80TR0_MOUSE]                         | 3.58  | 1  | 1  | 2  | 6   | 1.16 | 1.18 | 1.02 | 1.16 | 1.00 | 1.08 | 0.93 | 1.05 | 0.91 | 1.13 | 0.98 | 1.17 | 1.01 | 111.58 | 4.67  |
| O88952 | Protein lin-7 homolog C OS=Mus musculus GN=Lin7c PE=1 SV=2 - [LIN7C_MOUSE]                               | 59.90 | 2  | 5  | 11 | 100 | 0.95 | 0.98 | 0.97 | 0.84 | 0.90 | 1.01 | 1.03 | 1.06 | 1.07 | 1.03 | 0.99 | 1.00 | 1.00 | 21.82  | 8.43  |
| P09411 | Phosphoglycerate kinase 1 OS=Mus musculus GN=Pgk1 PE=1 SV=4 - [PGK1_MOUSE]                               | 78.42 | 4  | 29 | 29 | 205 | 0.97 | 0.90 | 0.93 | 1.06 | 1.03 | 1.07 | 1.08 | 1.06 | 1.08 | 1.02 | 1.04 | 1.02 | 1.03 | 44.52  | 7.90  |
| Q3UHK1 | Proton myo-inositol cotransporter OS=Mus musculus GN=Slc2a13 PE=2 SV=2 - [MYCT_MOUSE]                    | 10.99 | 1  | 6  | 6  | 17  | 0.96 | 1.09 | 1.11 | 1.07 | 1.14 | 0.91 | 0.93 | 1.06 | 0.96 | 1.19 | 1.22 | 1.16 | 1.01 | 69.02  | 6.86  |
| Q3V1N5 | Protein Heca OS=Mus musculus GN=Heca PE=2 SV=1 - [Q3V1N5_MOUSE]                                          | 2.57  | 1  | 1  | 1  | 6   | 0.96 | 1.21 | 1.27 | 1.04 | 1.12 | 1.04 | 1.08 | 1.06 | 1.10 | 0.91 | 1.03 | 1.04 | 1.05 | 59.08  | 8.60  |
| D3YZ09 | H/ACA ribonucleoprotein complex subunit 1 (Fragment) OS=Mus musculus GN=Gar1 PE=2 SV=1 - [D3YZ09_MOUSE]  | 17.17 | 5  | 3  | 3  | 5   | 1.10 | 0.89 | 0.77 | 0.97 | 0.88 | 1.10 | 0.98 | 1.06 | 1.00 | 0.97 | 0.84 | 1.07 | 0.93 | 20.44  | 10.14 |
| Q3TC93 | HCLS1-binding protein 3 OS=Mus musculus GN=Hs1bp3 PE=1 SV=2 - [H1BP3_MOUSE]                              | 19.75 | 1  | 4  | 4  | 8   | 1.02 | 1.08 | 1.18 | 1.03 | 1.01 | 1.19 | 1.16 | 1.06 | 1.03 | 1.04 | 1.08 | 1.01 | 1.01 | 43.66  | 4.98  |
| Q6PGH2 | Hematological and neurological expressed 1-like protein OS=Mus musculus GN=Hn11 PE=2 SV=1 - [HN11_MOUSE] | 46.32 | 2  | 5  | 5  | 12  | 1.21 | 0.94 | 0.77 | 0.91 | 0.73 | 1.15 | 0.93 | 1.06 | 0.87 | 1.12 | 0.92 | 1.10 | 0.94 | 20.01  | 8.62  |
| Q3U2E2 | Zinc finger MYM-type protein 5 OS=Mus musculus GN=Zmym5 PE=2 SV=2 - [ZMYM5_MOUSE]                        | 0.96  | 1  | 1  | 1  | 1   | 1.02 | 0.97 | 0.95 | 1.22 | 1.19 | 1.12 | 1.09 | 1.06 | 1.03 | 1.20 | 1.18 | 0.96 | 0.94 | 70.03  | 7.97  |
| Q9D2U5 | LSM domain-containing protein 1 OS=Mus musculus GN=Lsm1 PE=2 SV=1 - [LSMD1_MOUSE]                        | 7.20  | 1  | 1  | 1  | 1   | 0.74 | 1.07 | 1.45 | 0.96 | 1.30 | 1.15 | 1.55 | 1.06 | 1.43 | 0.83 | 1.13 | 0.93 | 1.27 | 13.42  | 5.50  |
| Q8CFR5 | Dystrobrevin alpha OS=Mus musculus GN=Dtna PE=2 SV=1 - [Q8CFR5_MOUSE]                                    | 21.41 | 19 | 11 | 11 | 29  | 1.02 | 1.13 | 1.08 | 1.03 | 0.97 | 1.12 | 1.14 | 1.06 | 1.11 | 1.14 | 1.10 | 1.07 | 1.05 | 76.90  | 6.89  |
| Q5EBG8 | Uncharacterized protein Clorf50 homolog OS=Mus musculus PE=2 SV=1 - [CA050_MOUSE]                        | 35.68 | 1  | 4  | 4  | 8   | 1.07 | 1.00 | 1.02 | 0.94 | 0.92 | 1.09 | 1.00 | 1.06 | 0.99 | 1.04 | 0.96 | 0.99 | 1.02 | 21.85  | 5.53  |

|        |                                                                                                               |       |   |    |    |     |      |      |      |      |      |      |      |      |      |      |      |      |      |        |      |
|--------|---------------------------------------------------------------------------------------------------------------|-------|---|----|----|-----|------|------|------|------|------|------|------|------|------|------|------|------|------|--------|------|
| B2RQC7 | DIP2 disco-interacting protein 2 homolog B (Drosophila) OS=Mus musculus GN=Dip2b PE=2 SV=1 - [B2RQC7_MOUSE]   | 12.84 | 3 | 1  | 15 | 31  | 0.85 | 0.98 | 1.16 | 0.94 | 1.11 | 0.94 | 1.10 | 1.06 | 1.24 | 1.10 | 1.30 | 1.04 | 1.23 | 146.60 | 8.03 |
| E9PVV3 | Potassium voltage-gated channel subfamily C member 1 OS=Mus musculus GN=Kcnc1 PE=2 SV=1 - [E9PVV3_MOUSE]      | 8.38  | 2 | 3  | 3  | 9   | 0.91 | 1.23 | 1.31 | 1.03 | 1.15 | 1.05 | 1.08 | 1.06 | 1.14 | 0.92 | 0.92 | 1.04 | 1.08 | 65.81  | 6.18 |
| P09450 | Transcription factor jun-B OS=Mus musculus GN=Junb PE=1 SV=1 - [JUNB_MOUSE]                                   | 10.17 | 1 | 2  | 2  | 2   | 1.03 | 0.94 | 0.91 | 1.04 | 1.01 | 1.21 | 1.17 | 1.06 | 1.02 | 1.06 | 1.03 | 1.09 | 1.06 | 35.74  | 9.22 |
| P07628 | Kallikrein 1-related peptidase b8 OS=Mus musculus GN=Klk1b8 PE=2 SV=1 - [K1KB8_MOUSE]                         | 14.56 | 1 | 1  | 1  | 1   | 0.71 | 0.79 | 1.12 | 0.84 | 1.18 | 0.99 | 1.39 | 1.06 | 1.49 | 1.19 | 1.69 | 1.02 | 1.45 | 28.51  | 8.00 |
| Q9JKK7 | Tropomodulin-2 OS=Mus musculus GN=Tmod2 PE=1 SV=2 - [TMOD2_MOUSE]                                             | 67.81 | 3 | 17 | 17 | 180 | 0.97 | 0.84 | 0.84 | 0.86 | 0.90 | 1.03 | 1.08 | 1.06 | 1.10 | 0.91 | 0.93 | 0.88 | 0.90 | 39.49  | 5.35 |
| E9Q3U1 | Ubiquitin-conjugating enzyme E2 H OS=Mus musculus GN=Ube2h PE=2 SV=1 - [E9Q3U1_MOUSE]                         | 19.74 | 4 | 2  | 2  | 4   | 0.98 | 0.93 | 0.85 | 1.02 | 1.04 | 1.12 | 1.11 | 1.06 | 1.07 | 0.97 | 0.93 | 0.89 | 0.86 | 17.16  | 4.67 |
| Q9Z1T2 | Thrombospondin-4 OS=Mus musculus GN=Thbs4 PE=1 SV=1 - [TSP4_MOUSE]                                            | 6.13  | 2 | 5  | 5  | 10  | 1.04 | 1.12 | 1.12 | 1.07 | 1.01 | 1.03 | 1.02 | 1.06 | 1.01 | 0.98 | 0.92 | 1.05 | 1.00 | 106.30 | 4.67 |
| O35737 | Heterogeneous nuclear ribonucleoprotein H OS=Mus musculus GN=Hnrph1 PE=1 SV=3 - [HNRH1_MOUSE]                 | 33.18 | 2 | 3  | 11 | 78  | 0.88 | 1.03 | 1.12 | 0.89 | 1.10 | 0.98 | 1.27 | 1.06 | 1.22 | 0.93 | 1.09 | 0.92 | 1.11 | 49.17  | 6.30 |
| E9Q7Z8 | Protein Ythdc1 OS=Mus musculus GN=Ythdc1 PE=2 SV=1 - [E9Q7Z8_MOUSE]                                           | 5.07  | 4 | 4  | 4  | 11  | 0.86 | 0.72 | 0.77 | 0.94 | 1.09 | 1.10 | 1.34 | 1.06 | 1.26 | 1.03 | 1.14 | 0.82 | 0.91 | 82.70  | 5.91 |
| Q9CFQ3 | Cleavage and polyadenylation specificity factor subunit 5 OS=Mus musculus GN=Nudr21 PE=2 SV=1 - [CPSF5_MOUSE] | 13.22 | 1 | 3  | 3  | 7   | 0.83 | 0.90 | 0.93 | 1.05 | 1.16 | 1.03 | 1.23 | 1.06 | 1.27 | 1.02 | 1.30 | 0.95 | 1.15 | 26.22  | 8.82 |
| O08579 | Emerin OS=Mus musculus GN=Emd PE=1 SV=1 - [EMD_MOUSE]                                                         | 23.17 | 4 | 5  | 5  | 15  | 0.89 | 0.79 | 0.94 | 0.96 | 1.19 | 1.01 | 1.35 | 1.06 | 1.20 | 0.95 | 1.14 | 0.85 | 1.08 | 29.42  | 5.01 |



|          |                                                                                                               |       |   |    |    |     |      |      |      |      |      |      |      |      |      |      |      |      |      |        |       |
|----------|---------------------------------------------------------------------------------------------------------------|-------|---|----|----|-----|------|------|------|------|------|------|------|------|------|------|------|------|------|--------|-------|
| Q8K194   | U4/U6.U5 small nuclear ribonucleoprotein 27 kDa protein OS=Mus musculus GN=Smp27 PE=2 SV=1 - [SNR27_MOUSE]    | 19.35 | 2 | 4  | 4  | 9   | 0.99 | 0.78 | 0.80 | 1.04 | 1.09 | 1.08 | 0.93 | 1.06 | 0.99 | 1.03 | 1.04 | 0.91 | 0.88 | 18.87  | 11.62 |
| P59048   | p53 and DNA damage-regulated protein 1 OS=Mus musculus GN=Pdrg1 PE=2 SV=1 - [PDRG1_MOUSE]                     | 9.77  | 1 | 1  | 1  | 2   | 0.81 | 0.83 | 1.03 | 1.14 | 1.41 | 1.53 | 1.89 | 1.06 | 1.30 | 1.09 | 1.35 | 0.80 | 0.99 | 15.37  | 8.10  |
| Q8BTS4   | Nuclear pore complex protein Nup54 OS=Mus musculus GN=Nup54 PE=1 SV=1 - [NUP54_MOUSE]                         | 6.08  | 1 | 2  | 2  | 4   | 1.04 | 1.03 | 0.99 | 1.07 | 1.02 | 1.05 | 1.01 | 1.06 | 1.01 | 1.02 | 0.98 | 0.99 | 0.95 | 55.70  | 7.02  |
| E9Q6R7   | Protein Utm OS=Mus musculus GN=Utm PE=2 SV=1 - [E9Q6R7_MOUSE]                                                 | 1.49  | 3 | 3  | 5  | 15  | 0.89 | 1.04 | 1.17 | 0.96 | 1.05 | 1.00 | 1.10 | 1.06 | 1.15 | 1.06 | 1.17 | 0.98 | 1.08 | 392.46 | 5.33  |
| D3Z7G3   | Protein 2010107G23Rik (Fragment) OS=Mus musculus GN=2010107G23Rik PE=2 SV=1 - [D3Z7G3_MOUSE]                  | 14.14 | 4 | 1  | 1  | 4   | 0.87 | 1.15 | 1.44 | 1.08 | 1.32 | 0.86 | 1.23 | 1.06 | 1.38 | 1.00 | 1.25 | 0.84 | 1.21 | 10.84  | 11.15 |
| Q922R1   | UPF0183 protein C16orf70 homolog OS=Mus musculus PE=2 SV=2 - [CP070_MOUSE]                                    | 7.11  | 3 | 2  | 2  | 4   | 1.07 | 1.27 | 1.19 | 1.36 | 1.28 | 0.87 | 0.82 | 1.06 | 0.99 | 1.14 | 1.07 | 1.25 | 1.18 | 47.39  | 7.74  |
| Q9CQB4   | Cytochrome b-c1 complex subunit 7 OS=Mus musculus GN=Uqerb PE=3 SV=1 - [Q9CQB4_MOUSE]                         | 54.05 | 2 | 9  | 9  | 174 | 0.97 | 0.80 | 0.83 | 0.86 | 0.89 | 1.06 | 1.08 | 1.06 | 1.10 | 0.95 | 0.99 | 0.90 | 0.94 | 13.55  | 9.11  |
| Q9CPX7   | 28S ribosomal protein S16, mitochondrial OS=Mus musculus GN=Mtpps16 PE=2 SV=1 - [RT16_MOUSE]                  | 20.74 | 1 | 2  | 2  | 4   | 0.77 | 0.85 | 1.10 | 0.96 | 1.25 | 0.98 | 1.27 | 1.06 | 1.37 | 1.02 | 1.32 | 0.94 | 1.23 | 15.18  | 9.67  |
| Q569Z5   | Probable ATP-dependent RNA helicase DDX46 OS=Mus musculus GN=Ddx46 PE=1 SV=2 - [DDX46_MOUSE]                  | 9.11  | 3 | 9  | 9  | 19  | 0.95 | 1.12 | 1.13 | 1.04 | 1.05 | 1.00 | 1.01 | 1.06 | 1.07 | 0.98 | 1.07 | 1.09 | 1.05 | 117.38 | 9.26  |
| P59281-2 | Isoform 2 of Rho GTPase-activating protein 39 OS=Mus musculus GN=Arhgap39 - [RHG39_MOUSE]                     | 16.08 | 5 | 12 | 12 | 25  | 0.99 | 1.13 | 1.18 | 1.09 | 1.11 | 1.07 | 1.18 | 1.06 | 1.09 | 1.10 | 1.14 | 1.05 | 1.14 | 121.40 | 7.52  |
| Q8CBY0   | Glutamyl-tRNA(Gln) amidotransferase subunit C, mitochondrial OS=Mus musculus GN=Gatc PE=2 SV=1 - [GATC_MOUSE] | 29.68 | 1 | 3  | 3  | 14  | 1.00 | 0.82 | 0.99 | 0.92 | 1.03 | 1.22 | 1.13 | 1.06 | 1.07 | 0.92 | 0.92 | 0.88 | 0.84 | 16.66  | 5.16  |

|          |                                                                                                                          |       |   |    |    |     |      |      |      |      |      |      |      |      |      |      |      |      |      |        |      |
|----------|--------------------------------------------------------------------------------------------------------------------------|-------|---|----|----|-----|------|------|------|------|------|------|------|------|------|------|------|------|------|--------|------|
| Q61387   | Cytochrome c oxidase subunit 7A-related protein, mitochondrial OS=Mus musculus GN=Cox7a2l PE=2 SV=1 - [COX7R_MOUSE]      | 48.65 | 2 | 3  | 3  | 4   | 0.92 | 1.15 | 1.14 | 1.21 | 1.17 | 1.22 | 1.18 | 1.06 | 1.24 | 1.19 | 1.21 | 1.14 | 1.19 | 12.39  | 9.60 |
| Q0VAV6   | Protein 8030462N17Rik OS=Mus musculus GN=8030462N17Rik PE=2 SV=1 - [Q0VAV6_MOUSE]                                        | 16.29 | 3 | 5  | 5  | 21  | 1.02 | 0.78 | 0.82 | 1.01 | 1.00 | 1.18 | 1.10 | 1.06 | 1.14 | 1.04 | 0.98 | 0.92 | 0.97 | 42.75  | 4.96 |
| Q8VC66   | Afadin- and alpha-actinin-binding protein OS=Mus musculus GN=Ssx2ip PE=1 SV=1 - [ADIP_MOUSE]                             | 6.83  | 1 | 3  | 3  | 5   | 0.96 | 1.16 | 1.10 | 0.82 | 0.87 | 1.04 | 1.10 | 1.06 | 1.10 | 1.03 | 1.07 | 1.06 | 1.13 | 70.91  | 6.65 |
| Q9JKL4   | NADH dehydrogenase [ubiquinone] 1 alpha subcomplex assembly factor 3 OS=Mus musculus GN=Ndufa3 PE=2 SV=1 - [NDUF3_MOUSE] | 5.95  | 1 | 1  | 1  | 2   | 1.07 | 1.00 | 0.94 | 1.02 | 0.95 | 1.12 | 1.05 | 1.06 | 0.99 | 0.87 | 0.81 | 1.00 | 0.94 | 20.72  | 8.05 |
| P34152-3 | Isoform 3 of Focal adhesion kinase 1 OS=Mus musculus GN=Ptk2 - [FAK1_MOUSE]                                              | 16.25 | 9 | 11 | 12 | 38  | 0.90 | 0.95 | 1.12 | 0.98 | 1.13 | 1.02 | 1.11 | 1.06 | 1.19 | 1.00 | 1.11 | 0.98 | 1.03 | 119.17 | 6.62 |
| Q9CZ13   | Cytochrome b-c1 complex subunit 1, mitochondrial OS=Mus musculus GN=Uqerc1 PE=1 SV=2 - [QCR1_MOUSE]                      | 47.92 | 1 | 15 | 15 | 189 | 0.98 | 1.09 | 1.08 | 1.01 | 1.02 | 1.04 | 1.06 | 1.06 | 1.09 | 1.05 | 1.11 | 1.08 | 1.11 | 52.82  | 6.21 |
| Q68FL1   | Bai3 protein (Fragment) OS=Mus musculus GN=Bai3 PE=2 SV=1 - [Q68FL1_MOUSE]                                               | 11.39 | 3 | 9  | 10 | 29  | 1.10 | 1.04 | 1.02 | 1.16 | 1.07 | 1.05 | 1.00 | 1.06 | 0.98 | 1.02 | 0.98 | 1.04 | 0.97 | 143.85 | 6.67 |
| Q8CI43   | Myosin light chain 6B OS=Mus musculus GN=Myl6b PE=2 SV=1 - [MYL6B_MOUSE]                                                 | 65.70 | 1 | 10 | 11 | 50  | 0.98 | 0.82 | 0.78 | 0.91 | 0.95 | 1.15 | 1.18 | 1.06 | 1.09 | 1.03 | 1.01 | 0.91 | 0.94 | 22.73  | 5.53 |
| B2RXE2   | Sodium/hydrogen exchanger OS=Mus musculus GN=Sle9a5 PE=2 SV=1 - [B2RXE2_MOUSE]                                           | 2.12  | 1 | 1  | 1  | 2   | 1.06 | 1.43 | 1.34 | 1.12 | 1.06 | 1.16 | 1.08 | 1.06 | 0.99 | 1.00 | 0.94 | 1.14 | 1.07 | 98.95  | 7.31 |
| Q921H9   | Sel1 repeat-containing protein 1 OS=Mus musculus GN=Selrc1 PE=1 SV=1 - [SELR1_MOUSE]                                     | 35.50 | 1 | 8  | 8  | 19  | 0.98 | 0.81 | 0.84 | 0.92 | 0.96 | 1.03 | 1.09 | 1.06 | 1.12 | 0.96 | 0.97 | 0.88 | 0.92 | 25.60  | 6.29 |
| Q8CIN4   | Serine/threonine-protein kinase PAK 2 OS=Mus musculus GN=Pak2 PE=1 SV=1 - [PAK2_MOUSE]                                   | 52.29 | 1 | 11 | 18 | 77  | 1.05 | 0.90 | 0.83 | 0.95 | 0.95 | 1.03 | 0.95 | 1.06 | 1.06 | 0.99 | 0.92 | 0.96 | 0.96 | 57.89  | 5.77 |
| F8VPP8   | Protein Zc3h7b OS=Mus musculus GN=Zc3h7b PE=2 SV=1 - [F8VPP8_MOUSE]                                                      | 1.02  | 1 | 1  | 1  | 3   | 0.95 | 1.35 | 1.56 | 1.05 | 1.10 | 1.00 | 0.89 | 1.06 | 1.11 | 1.05 | 1.10 | 0.97 | 1.02 | 110.22 | 7.42 |

|          |                                                                                                            |       |    |    |    |     |      |      |      |      |      |       |      |      |      |      |      |      |      |        |      |
|----------|------------------------------------------------------------------------------------------------------------|-------|----|----|----|-----|------|------|------|------|------|-------|------|------|------|------|------|------|------|--------|------|
| Q8R1Q8   | Cytoplasmic dynein 1 light intermediate chain 1 OS=Mus musculus GN=Dync1h1 PE=1 SV=1 - [DC1L1_MOUSE]       | 53.15 | 1  | 22 | 23 | 114 | 0.96 | 0.88 | 0.88 | 0.92 | 0.96 | 1.01  | 1.03 | 1.06 | 1.08 | 0.96 | 1.00 | 0.98 | 1.03 | 56.58  | 6.42 |
| B1ARW6   | Metal regulatory transcription factor 1 (Fragment) OS=Mus musculus GN=Mtfl PE=2 SV=1 - [B1ARW6_MOUSE]      | 7.75  | 2  | 1  | 1  | 2   | 1.08 | 0.88 | 0.81 | 0.97 | 0.90 | 1.01  | 0.93 | 1.06 | 0.97 | 0.91 | 0.84 | 1.08 | 1.00 | 15.84  | 4.35 |
| E9Q456   | Tropomyosin alpha-1 chain OS=Mus musculus GN=Tpm1 PE=2 SV=1 - [E9Q456_MOUSE]                               | 52.42 | 2  | 1  | 16 | 346 | 0.97 | 1.18 | 1.12 | 0.90 | 0.91 | 3.90  | 3.75 | 1.06 | 1.09 | 1.12 | 1.07 | 0.95 | 0.98 | 28.65  | 4.77 |
| A2AA55   | SH3 and PX domain-containing protein 2B OS=Mus musculus GN=Sh3pxd2b PE=1 SV=1 - [SPD2B_MOUSE]              | 1.87  | 1  | 2  | 2  | 9   | 0.96 | 1.20 | 1.18 | 0.98 | 1.01 | 0.99  | 1.08 | 1.06 | 1.06 | 1.02 | 1.05 | 1.02 | 1.03 | 101.45 | 8.66 |
| P97457   | Myosin regulatory light chain 2, skeletal muscle isoform OS=Mus musculus GN=Myipf PE=1 SV=3 - [MLRS_MOUSE] | 76.92 | 2  | 12 | 12 | 32  | 1.11 | 1.25 | 1.13 | 1.02 | 0.96 | 11.42 | 8.29 | 1.06 | 1.05 | 1.24 | 1.16 | 1.12 | 1.06 | 18.94  | 4.92 |
| Q02357-6 | Isoform 6 of Ankyrin-1 OS=Mus musculus GN=Ank1 - [ANK1_MOUSE]                                              | 17.72 | 17 | 19 | 21 | 46  | 1.00 | 1.13 | 1.08 | 0.97 | 1.00 | 1.05  | 0.97 | 1.06 | 1.05 | 1.04 | 1.00 | 1.04 | 0.97 | 209.42 | 6.74 |
| Q810B8   | SLIT and NTRK-like protein 4 OS=Mus musculus GN=Slitrk4 PE=2 SV=2 - [SLIK4_MOUSE]                          | 4.90  | 1  | 3  | 3  | 6   | 1.20 | 1.42 | 1.04 | 1.20 | 0.89 | 1.14  | 0.92 | 1.06 | 0.90 | 1.17 | 0.96 | 1.14 | 0.92 | 94.48  | 7.80 |
| P14211   | Calreticulin OS=Mus musculus GN=Calr PE=1 SV=1 - [CALR_MOUSE]                                              | 69.95 | 1  | 25 | 25 | 231 | 0.94 | 0.75 | 0.81 | 0.86 | 0.92 | 1.06  | 1.12 | 1.06 | 1.14 | 1.00 | 1.05 | 0.92 | 1.01 | 47.96  | 4.49 |
| Q9J111   | Serine/threonine-protein kinase 4 OS=Mus musculus GN=Stk4 PE=1 SV=1 - [STK4_MOUSE]                         | 8.83  | 4  | 1  | 3  | 5   | 0.80 | 0.87 | 1.09 | 0.84 | 1.04 | 1.03  | 1.28 | 1.06 | 1.32 | 1.11 | 1.38 | 1.02 | 1.28 | 55.51  | 5.19 |
| Q8CI33-2 | Isoform 2 of CWF19-like protein 1 OS=Mus musculus GN=Cwf19l1 - [C19L1_MOUSE]                               | 3.51  | 2  | 1  | 1  | 2   | 1.04 | 1.17 | 1.13 | 1.05 | 1.01 | 1.12  | 1.07 | 1.06 | 1.02 | 1.10 | 1.06 | 1.08 | 1.04 | 45.09  | 7.68 |
| Q9DCM4   | Dynein light chain 4, axonemal OS=Mus musculus GN=Dnal4 PE=2 SV=2 - [DNAL4_MOUSE]                          | 7.62  | 2  | 1  | 1  | 1   | 1.00 | 1.17 | 1.17 | 1.00 | 1.00 | 1.10  | 1.09 | 1.06 | 1.06 | 1.09 | 1.09 | 1.15 | 1.16 | 12.01  | 5.49 |
| Q6IR34-3 | Isoform 3 of G-protein-signaling modulator 1 OS=Mus musculus GN=Gpsm1 - [GPSM1_MOUSE]                      | 18.92 | 10 | 8  | 8  | 14  | 1.04 | 0.83 | 0.78 | 0.97 | 0.90 | 1.28  | 1.14 | 1.06 | 1.01 | 1.28 | 1.27 | 1.50 | 1.26 | 71.88  | 6.15 |

|        |                                                                                                         |       |    |    |    |     |      |      |      |      |      |      |      |      |      |      |      |      |      |        |      |
|--------|---------------------------------------------------------------------------------------------------------|-------|----|----|----|-----|------|------|------|------|------|------|------|------|------|------|------|------|------|--------|------|
| Q8VBX6 | Isoform 2 of Multiple PDZ domain protein OS=Mus musculus GN=Mpdz - [MPDZ_MOUSE]                         | 4.10  | 11 | 5  | 5  | 10  | 1.00 | 1.14 | 1.07 | 0.96 | 1.04 | 1.09 | 1.05 | 1.06 | 1.05 | 1.00 | 1.07 | 1.01 | 1.09 | 214.93 | 5.01 |
| Q9Z1X4 | Interleukin enhancer-binding factor 3 OS=Mus musculus GN=Ilf3 PE=1 SV=2 - [ILF3_MOUSE]                  | 20.27 | 4  | 11 | 12 | 42  | 0.98 | 1.06 | 1.16 | 1.05 | 1.12 | 1.02 | 1.14 | 1.06 | 1.06 | 1.00 | 1.03 | 1.02 | 1.09 | 95.96  | 8.76 |
| Q9QXV8 | Protein sprouty homolog 2 OS=Mus musculus GN=Spry2 PE=2 SV=1 - [SPY2_MOUSE]                             | 5.08  | 1  | 1  | 1  | 2   | 0.98 | 0.91 | 0.93 | 0.83 | 0.85 | 1.05 | 1.07 | 1.06 | 1.08 | 0.69 | 0.70 | 1.12 | 1.14 | 34.60  | 8.29 |
| Q8C1B1 | Calmodulin-regulated spectrin-associated protein 2 OS=Mus musculus GN=Camsap2 PE=1 SV=3 - [CAMP2_MOUSE] | 21.15 | 5  | 23 | 24 | 57  | 0.94 | 0.97 | 0.95 | 0.95 | 1.05 | 1.01 | 1.03 | 1.06 | 1.11 | 1.00 | 1.05 | 0.98 | 1.04 | 164.23 | 6.86 |
| F8W157 | Actin-like protein 6B OS=Mus musculus GN=Actl6b PE=2 SV=1 - [F8W157_MOUSE]                              | 12.07 | 4  | 3  | 4  | 7   | 1.10 | 0.95 | 0.92 | 0.88 | 0.91 | 1.17 | 1.04 | 1.06 | 1.00 | 1.03 | 1.02 | 1.13 | 1.06 | 41.66  | 5.36 |
| Q9QUR7 | Peptidyl-prolyl cis-trans isomerase NIMA-interacting 1 OS=Mus musculus GN=Pin1 PE=1 SV=1 - [PIN1_MOUSE] | 56.97 | 1  | 9  | 9  | 79  | 0.96 | 0.79 | 0.79 | 0.89 | 0.92 | 1.11 | 1.12 | 1.06 | 1.13 | 0.98 | 1.04 | 0.85 | 0.94 | 18.36  | 8.79 |
| E0CYH4 | WD repeat-containing protein 26 OS=Mus musculus GN=Wdr26 PE=2 SV=1 - [E0CYH4_MOUSE]                     | 13.44 | 3  | 5  | 5  | 14  | 1.03 | 1.25 | 1.21 | 1.04 | 0.98 | 0.92 | 0.86 | 1.06 | 0.98 | 1.03 | 0.99 | 1.06 | 1.03 | 68.84  | 6.15 |
| Q8CHU3 | Epsin-2 OS=Mus musculus GN=Epn2 PE=1 SV=1 - [EPN2_MOUSE]                                                | 30.92 | 4  | 9  | 12 | 109 | 1.01 | 0.81 | 0.93 | 0.93 | 0.91 | 1.01 | 1.07 | 1.06 | 1.07 | 0.93 | 0.92 | 0.90 | 0.94 | 63.43  | 8.16 |
| Q922J3 | CAP-Gly domain-containing linker protein 1 OS=Mus musculus GN=Clip1 PE=1 SV=1 - [CLIP1_MOUSE]           | 58.45 | 3  | 6  | 80 | 343 | 1.14 | 0.98 | 0.82 | 0.95 | 0.86 | 1.17 | 1.09 | 1.06 | 0.99 | 1.00 | 1.04 | 0.96 | 0.87 | 155.72 | 5.24 |
| Q9JKV1 | Proteasomal ubiquitin receptor ADRM1 OS=Mus musculus GN=Adrm1 PE=1 SV=2 - [ADRM1_MOUSE]                 | 14.50 | 2  | 5  | 5  | 9   | 0.99 | 1.11 | 1.02 | 0.93 | 0.99 | 1.15 | 1.19 | 1.06 | 1.17 | 1.06 | 1.18 | 1.17 | 1.19 | 42.03  | 5.07 |
| Q91ZV7 | Plexin domain-containing protein 1 OS=Mus musculus GN=Plxdc1 PE=1 SV=2 - [PLDX1_MOUSE]                  | 4.80  | 2  | 2  | 2  | 2   | 0.78 | 1.27 | 1.62 | 0.85 | 1.08 | 1.21 | 1.54 | 1.06 | 1.35 | 1.04 | 1.33 | 0.90 | 1.16 | 55.60  | 6.62 |
| Q9WV92 | Isoform 7 of Band 4.1-like protein 3 OS=Mus musculus GN=Epb4113 - [E41L3_MOUSE]                         | 54.31 | 1  | 1  | 37 | 260 | 1.08 | 1.01 | 0.94 | 0.91 | 0.85 | 1.09 | 1.01 | 1.06 | 0.98 | 1.13 | 1.05 | 0.82 | 0.77 | 91.79  | 5.50 |

|          |                                                                                                                      |       |   |    |    |     |      |      |      |      |      |      |      |      |      |      |      |      |      |        |      |
|----------|----------------------------------------------------------------------------------------------------------------------|-------|---|----|----|-----|------|------|------|------|------|------|------|------|------|------|------|------|------|--------|------|
| Q8R0H9   | ADP-ribosylation factor-binding protein GGA1 OS=Mus musculus GN=Gga1 PE=1 SV=1 - [GGA1_MOUSE]                        | 11.02 | 1 | 6  | 6  | 13  | 1.03 | 0.97 | 0.94 | 1.06 | 0.99 | 1.04 | 0.98 | 1.06 | 1.08 | 1.00 | 0.95 | 0.98 | 0.91 | 69.93  | 5.27 |
| Q9R060   | Cytosolic Fe-S cluster assembly factor NUBP1 OS=Mus musculus GN=Nubp1 PE=1 SV=1 - [NUBP1_MOUSE]                      | 5.63  | 1 | 1  | 1  | 1   | 1.19 | 1.31 | 1.10 | 0.55 | 0.46 | 1.21 | 1.01 | 1.06 | 0.89 | 1.59 | 1.34 | 1.74 | 1.46 | 34.06  | 5.90 |
| Q99NF7   | Ppm1b protein OS=Mus musculus GN=Ppm1b PE=2 SV=1 - [Q99NF7_MOUSE]                                                    | 22.64 | 5 | 1  | 9  | 29  | 0.89 | 0.81 | 0.91 | 0.76 | 0.85 | 0.97 | 1.08 | 1.06 | 1.18 | 1.03 | 1.16 | 1.26 | 1.41 | 52.08  | 5.11 |
| Q8C3X2   | Coiled-coil domain-containing protein 90B, mitochondrial OS=Mus musculus GN=Ccd90b PE=2 SV=1 - [CC90B_MOUSE]         | 13.28 | 5 | 4  | 4  | 6   | 1.11 | 0.94 | 0.82 | 1.00 | 0.82 | 1.13 | 1.03 | 1.06 | 0.90 | 1.05 | 0.86 | 1.04 | 0.92 | 29.58  | 8.53 |
| Q9Z2I8-2 | Isoform 2 of Succinyl-CoA ligase [GDP-forming] subunit beta, mitochondrial OS=Mus musculus GN=Suclg2 - [SUCB2_MOUSE] | 23.44 | 2 | 8  | 8  | 12  | 1.01 | 0.91 | 0.83 | 1.11 | 1.03 | 1.07 | 1.05 | 1.06 | 1.07 | 1.04 | 1.04 | 1.03 | 1.04 | 41.32  | 5.44 |
| P97762   | Retinitis pigmentosa 9 protein homolog OS=Mus musculus GN=rp9 PE=1 SV=1 - [RP9_MOUSE]                                | 3.76  | 1 | 1  | 1  | 1   | 1.10 | 0.97 | 0.88 | 0.83 | 0.75 | 0.91 | 0.82 | 1.06 | 0.96 | 1.15 | 1.05 | 0.85 | 0.78 | 25.25  | 9.83 |
| Q3UVR3   | Isoform 2 of Tau-tubulin kinase 2 OS=Mus musculus GN=Ttk2 - [TTBK2_MOUSE]                                            | 2.91  | 4 | 3  | 3  | 4   | 0.96 | 0.97 | 1.01 | 0.92 | 0.95 | 1.17 | 1.21 | 1.06 | 1.10 | 1.19 | 1.28 | 1.27 | 1.51 | 132.17 | 6.52 |
| Q99LH9   | SH3 domain-binding protein 5-like OS=Mus musculus GN=Sh3bp5l PE=1 SV=1 - [3BPSL_MOUSE]                               | 15.05 | 1 | 4  | 4  | 12  | 1.18 | 0.86 | 0.80 | 0.77 | 0.72 | 1.13 | 0.88 | 1.06 | 0.90 | 0.94 | 0.87 | 0.98 | 0.80 | 43.35  | 6.00 |
| Q99P88   | Nuclear pore complex protein Nup155 OS=Mus musculus GN=Nup155 PE=2 SV=1 - [NU155_MOUSE]                              | 1.22  | 1 | 1  | 1  | 2   | 1.46 | 0.87 | 0.59 | 1.07 | 0.73 | 1.36 | 0.93 | 1.06 | 0.72 | 1.11 | 0.76 | 1.19 | 0.81 | 155.02 | 6.15 |
| Q9Z2I1   | Peroxisomal membrane protein 11A OS=Mus musculus GN=Pex11a PE=2 SV=1 - [PX11A_MOUSE]                                 | 5.28  | 1 | 1  | 1  | 1   | 0.74 | 1.23 | 1.66 | 0.84 | 1.13 | 1.25 | 1.67 | 1.06 | 1.43 | 1.14 | 1.54 | 0.61 | 0.83 | 28.14  | 9.83 |
| P21107-2 | Isoform 2 of Tropomyosin alpha-3 chain OS=Mus musculus GN=Tpm3 - [TPM3_MOUSE]                                        | 58.06 | 3 | 8  | 22 | 411 | 1.05 | 0.98 | 0.88 | 0.98 | 0.84 | 1.12 | 1.00 | 1.06 | 0.98 | 1.03 | 0.99 | 0.99 | 0.93 | 29.00  | 4.78 |
| D3YUS5   | Protein Rasal2 OS=Mus musculus GN=Rasal2 PE=2 SV=1 - [D3YUS5_MOUSE]                                                  | 18.32 | 6 | 13 | 15 | 38  | 0.95 | 0.98 | 1.12 | 0.91 | 0.96 | 0.99 | 1.08 | 1.06 | 1.09 | 0.95 | 1.09 | 0.97 | 1.10 | 141.92 | 7.80 |

|          |                                                                                                                               |       |   |    |    |     |      |      |      |      |      |      |      |      |      |      |      |      |      |        |      |
|----------|-------------------------------------------------------------------------------------------------------------------------------|-------|---|----|----|-----|------|------|------|------|------|------|------|------|------|------|------|------|------|--------|------|
| Q61029-3 | Isoform Epsilon of Lamina-associated polypeptide 2, isoforms beta/delta/epsilon/gamma OS=Mus musculus GN=Tmpo - [LAP2B_MOUSE] | 44.66 | 5 | 5  | 14 | 43  | 0.94 | 1.10 | 0.97 | 0.98 | 0.95 | 1.08 | 1.16 | 1.06 | 1.16 | 1.03 | 1.14 | 0.98 | 0.97 | 46.02  | 9.22 |
| F8VQA4   | Peptidyl-glycine alpha-amidating monooxygenase OS=Mus musculus GN=Pam PE=2 SV=1 - [F8VQA4_MOUSE]                              | 22.60 | 6 | 16 | 16 | 65  | 1.30 | 0.99 | 0.74 | 0.95 | 0.71 | 1.01 | 0.78 | 1.06 | 0.82 | 1.06 | 0.84 | 1.07 | 0.81 | 108.76 | 6.60 |
| Q8R050-2 | Isoform 2 of Eukaryotic peptide chain release factor GTP-binding subunit ERF3A OS=Mus musculus GN=Gsp1 - [ERF3A_MOUSE]        | 30.87 | 3 | 4  | 16 | 51  | 1.01 | 0.99 | 0.99 | 0.98 | 0.91 | 0.83 | 0.82 | 1.06 | 1.05 | 0.92 | 0.85 | 1.02 | 1.13 | 68.48  | 5.21 |
| Q9JKC6   | Cell cycle exit and neuronal differentiation protein 1 OS=Mus musculus GN=Cend1 PE=1 SV=1 - [CEND_MOUSE]                      | 73.15 | 1 | 8  | 8  | 148 | 1.01 | 0.82 | 0.81 | 0.95 | 1.00 | 1.21 | 1.22 | 1.06 | 1.11 | 1.07 | 1.09 | 0.93 | 0.94 | 14.98  | 8.97 |
| Q9ES00   | Ubiquitin conjugation factor E4 B OS=Mus musculus GN=Ube4b PE=1 SV=3 - [UBE4B_MOUSE]                                          | 2.13  | 4 | 1  | 2  | 9   | 1.14 | 1.35 | 1.18 | 1.11 | 0.97 | 1.20 | 1.05 | 1.06 | 0.93 | 1.09 | 0.96 | 1.42 | 1.25 | 133.23 | 6.07 |
| Q78YZ6-2 | Isoform 3 of Short coiled-coil protein OS=Mus musculus GN=Scoc - [SCOC_MOUSE]                                                 | 56.79 | 3 | 3  | 3  | 18  | 1.05 | 0.78 | 0.84 | 0.89 | 0.93 | 1.05 | 1.11 | 1.06 | 1.05 | 1.01 | 1.04 | 0.96 | 1.02 | 9.28   | 4.75 |
| Q68FH0-2 | Isoform 2 of Pkaphilin-4 OS=Mus musculus GN=Pkp4 - [PKP4_MOUSE]                                                               | 21.71 | 6 | 17 | 20 | 44  | 0.97 | 0.97 | 1.07 | 1.01 | 1.04 | 1.00 | 1.02 | 1.06 | 1.02 | 1.01 | 1.01 | 1.07 | 1.07 | 126.70 | 8.95 |
| F7AI27   | Leucine-rich repeat-containing protein 16A (Fragment) OS=Mus musculus GN=Lrcl16a PE=2 SV=1 - [F7AI27_MOUSE]                   | 4.40  | 4 | 2  | 3  | 5   | 0.98 | 0.93 | 0.94 | 0.90 | 0.92 | 1.12 | 1.13 | 1.06 | 1.08 | 1.06 | 1.08 | 1.11 | 1.13 | 102.53 | 7.94 |
| Q91V24   | ATP-binding cassette sub-family A member 7 OS=Mus musculus GN=Abca7 PE=1 SV=1 - [ABCA7_MOUSE]                                 | 2.69  | 2 | 4  | 4  | 9   | 1.01 | 0.95 | 0.92 | 1.14 | 1.13 | 0.92 | 0.95 | 1.06 | 1.02 | 1.10 | 1.03 | 0.99 | 1.01 | 236.73 | 7.28 |
| Q8K4E0   | Alstrom syndrome protein 1 homolog OS=Mus musculus GN=Alms1 PE=1 SV=2 - [ALMS1_MOUSE]                                         | 0.46  | 1 | 1  | 1  | 2   | 1.08 | 0.96 | 0.89 | 1.07 | 0.99 | 1.17 | 1.08 | 1.06 | 0.98 | 1.00 | 0.93 | 1.04 | 0.96 | 359.99 | 6.39 |
| P01831   | Thy-1 membrane glycoprotein OS=Mus musculus GN=Thy1 PE=1 SV=1 - [THY1_MOUSE]                                                  | 32.10 | 1 | 5  | 5  | 347 | 1.00 | 1.12 | 1.12 | 0.95 | 0.95 | 1.05 | 1.04 | 1.06 | 1.07 | 1.03 | 1.03 | 1.04 | 1.03 | 18.07  | 8.97 |

|          |                                                                                                                                  |       |    |   |    |    |      |      |      |      |      |      |      |      |      |      |      |      |      |        |        |      |
|----------|----------------------------------------------------------------------------------------------------------------------------------|-------|----|---|----|----|------|------|------|------|------|------|------|------|------|------|------|------|------|--------|--------|------|
| P70170-3 | Isoform SUR2C of ATP-binding cassette sub-family C member 9 OS=Mus musculus GN=Abcc9 - [ABCC9_MOUSE]                             | 0.46  | 5  | 1 | 1  | 1  | 1    | 1.02 | 1.05 | 1.03 | 1.13 | 1.11 | 1.43 | 1.40 | 1.06 | 1.04 | 1.13 | 1.11 | 1.34 | 1.32   | 169.98 | 7.24 |
| E9PZA8   | Synaptotagmin-7 OS=Mus musculus GN=Syt7 PE=2 SV=1 - [E9PZA8_MOUSE]                                                               | 31.92 | 2  | 3 | 14 | 37 | 0.85 | 0.98 | 1.03 | 0.90 | 0.98 | 0.94 | 1.04 | 1.06 | 1.21 | 1.05 | 1.25 | 1.02 | 1.04 | 63.06  | 9.44   |      |
| Q8K3W3   | Protein CASC3 OS=Mus musculus GN=Casc3 PE=1 SV=3 - [CASC3_MOUSE]                                                                 | 11.75 | 1  | 7 | 7  | 13 | 1.08 | 0.85 | 0.91 | 1.04 | 0.90 | 1.15 | 1.07 | 1.06 | 1.04 | 1.09 | 1.02 | 1.07 | 0.92 | 75.72  | 6.44   |      |
| F8WHU6   | Cadherin-9 OS=Mus musculus GN=Cdh9 PE=2 SV=1 - [F8WHU6_MOUSE]                                                                    | 11.04 | 2  | 4 | 7  | 12 | 0.97 | 1.31 | 1.44 | 0.86 | 0.88 | 1.11 | 0.98 | 1.06 | 1.09 | 0.93 | 0.96 | 0.97 | 0.99 | 88.47  | 4.96   |      |
| Q9D0E3   | LysM and putative peptidoglycan-binding domain-containing protein 1 OS=Mus musculus GN=Lysmd1 PE=1 SV=1 - [LYSM1_MOUSE]          | 53.54 | 1  | 7 | 8  | 26 | 0.92 | 0.95 | 0.97 | 0.85 | 0.98 | 1.07 | 1.19 | 1.06 | 1.13 | 0.98 | 1.05 | 0.82 | 1.01 | 24.80  | 8.92   |      |
| Q91ZR2   | Sorting nexin-18 OS=Mus musculus GN=Snx18 PE=2 SV=1 - [SNX18_MOUSE]                                                              | 1.95  | 2  | 1 | 1  | 3  | 1.10 | 1.16 | 1.05 | 1.03 | 0.94 | 1.14 | 1.04 | 1.06 | 0.96 | 1.05 | 0.95 | 1.08 | 0.99 | 67.86  | 6.67   |      |
| D3YZT0   | 60S ribosomal protein L9 (Fragment) OS=Mus musculus GN=Rpl9 PE=2 SV=1 - [D3YZT0_MOUSE]                                           | 43.75 | 4  | 3 | 3  | 6  | 1.10 | 1.20 | 1.17 | 1.28 | 0.96 | 1.01 | 0.82 | 1.06 | 0.85 | 0.88 | 0.81 | 1.00 | 0.98 | 9.27   | 10.74  |      |
| E9PWB1   | Pleckstrin homology-like domain family B member 1 OS=Mus musculus GN=Phldb1 PE=2 SV=1 - [E9PWB1_MOUSE]                           | 7.93  | 12 | 7 | 7  | 10 | 0.96 | 0.99 | 1.06 | 0.96 | 1.02 | 1.06 | 1.12 | 1.06 | 1.10 | 1.10 | 1.13 | 1.09 | 1.17 | 144.95 | 8.88   |      |
| P09242   | Alkaline phosphatase, tissue-nonspecific isozyme OS=Mus musculus GN=Alpl PE=1 SV=2 - [PPBT_MOUSE]                                | 13.55 | 2  | 6 | 6  | 14 | 0.99 | 1.07 | 0.96 | 1.05 | 1.04 | 1.04 | 1.08 | 1.06 | 1.04 | 1.09 | 1.02 | 0.90 | 0.86 | 57.48  | 7.01   |      |
| Q8R4N0   | Citrate lyase subunit beta-like protein, mitochondrial OS=Mus musculus GN=Clybl PE=2 SV=2 - [CLYBL_MOUSE]                        | 32.54 | 1  | 9 | 9  | 20 | 1.00 | 0.87 | 0.81 | 0.95 | 0.97 | 1.10 | 1.10 | 1.06 | 1.08 | 1.02 | 1.03 | 1.13 | 1.03 | 37.52  | 8.54   |      |
| Q4LDD4   | Isoform 3 of Arf-GAP with Rho-GAP domain, ANK repeat and PH domain-containing protein 1 OS=Mus musculus GN=Arap1 - [ARAP1_MOUSE] | 0.67  | 3  | 1 | 1  | 1  | 0.87 | 1.19 | 1.37 | 1.01 | 1.16 | 0.94 | 1.07 | 1.06 | 1.22 | 1.18 | 1.36 | 1.21 | 1.39 | 134.55 | 6.24   |      |

|        |                                                                                                              |       |   |    |    |     |      |      |      |      |      |      |      |      |      |      |      |      |      |        |      |
|--------|--------------------------------------------------------------------------------------------------------------|-------|---|----|----|-----|------|------|------|------|------|------|------|------|------|------|------|------|------|--------|------|
| G3UZ30 | Protein phosphatase 1 regulatory subunit 11 (Fragment) OS=Mus musculus GN=Ppp1r11 PE=2 SV=2 - [G3UZ30_MOUSE] | 53.33 | 3 | 4  | 4  | 158 | 1.05 | 0.76 | 0.73 | 0.95 | 0.89 | 1.18 | 1.08 | 1.06 | 1.01 | 1.03 | 1.00 | 0.96 | 0.89 | 13.83  | 8.59 |
| P62748 | Hippocalcin-like protein 1 OS=Mus musculus GN=Hpcal1 PE=2 SV=2 - [HPCL1_MOUSE]                               | 74.61 | 1 | 4  | 16 | 255 | 1.58 | 0.82 | 0.59 | 0.94 | 0.59 | 1.07 | 0.68 | 1.06 | 0.65 | 1.12 | 0.72 | 1.39 | 0.91 | 22.32  | 5.50 |
| E9Q5C9 | Protein Ndc1 OS=Mus musculus GN=Ndc1 PE=2 SV=1 - [E9Q5C9_MOUSE]                                              | 19.23 | 1 | 15 | 15 | 35  | 1.05 | 0.85 | 0.83 | 1.06 | 0.98 | 0.98 | 0.95 | 1.06 | 1.02 | 1.07 | 1.01 | 0.91 | 0.86 | 73.65  | 9.36 |
| Q9CWX8 | Sorting nexin-2 OS=Mus musculus GN=Snx2 PE=1 SV=2 - [SNX2_MOUSE]                                             | 27.94 | 1 | 12 | 14 | 28  | 1.02 | 1.12 | 1.09 | 1.13 | 1.06 | 1.06 | 0.96 | 1.06 | 0.99 | 1.02 | 1.02 | 1.06 | 0.97 | 58.43  | 5.12 |
| Q9CQG2 | Isoform 2 of Methyltransferase-like protein 16 OS=Mus musculus GN=Mettl16 [MET16_MOUSE]                      | 3.63  | 3 | 1  | 1  | 2   | 1.01 | 1.17 | 1.16 | 1.41 | 1.40 | 0.95 | 0.93 | 1.06 | 1.05 | 1.16 | 1.15 | 1.19 | 1.18 | 58.77  | 7.37 |
| G5E8E0 | Regulator of G-protein signaling 17, isoform CRA_b OS=Mus musculus GN=Rgs17 PE=4 SV=1 - [G5E8E0_MOUSE]       | 23.91 | 3 | 4  | 4  | 7   | 1.00 | 1.13 | 1.16 | 1.05 | 1.00 | 1.09 | 1.10 | 1.06 | 1.06 | 1.03 | 1.05 | 1.08 | 1.10 | 26.61  | 6.01 |
| Q8BXR1 | Probable cationic amino acid transporter OS=Mus musculus GN=Slc7a14 PE=2 SV=1 - [S7A14_MOUSE]                | 15.30 | 2 | 9  | 9  | 26  | 1.28 | 1.01 | 0.95 | 1.21 | 0.90 | 0.95 | 0.76 | 1.06 | 0.89 | 1.14 | 0.97 | 1.22 | 0.97 | 83.93  | 5.35 |
| E9QK04 | Neogenin OS=Mus musculus GN=Neo1 PE=2 SV=1 - [E9QK04_MOUSE]                                                  | 17.90 | 6 | 18 | 18 | 45  | 1.06 | 1.07 | 0.99 | 0.99 | 0.96 | 1.02 | 0.98 | 1.06 | 1.02 | 1.06 | 0.98 | 1.03 | 0.98 | 162.82 | 6.49 |
| O88745 | Scrapie-responsive protein 1 OS=Mus musculus GN=Scrg1 PE=2 SV=1 - [SCRG1_MOUSE]                              | 31.63 | 1 | 3  | 3  | 8   | 1.01 | 0.76 | 0.69 | 0.99 | 0.91 | 1.10 | 1.10 | 1.06 | 1.07 | 0.83 | 0.83 | 0.99 | 1.01 | 11.17  | 7.91 |
| Q62417 | Sorbin and SH3 domain-containing protein 1 OS=Mus musculus GN=Sorbs1 PE=1 SV=2 - [SRBS1_MOUSE]               | 26.82 | 1 | 5  | 31 | 103 | 0.96 | 0.81 | 0.80 | 1.06 | 1.11 | 1.00 | 1.11 | 1.06 | 1.08 | 0.98 | 0.98 | 0.97 | 1.02 | 142.98 | 8.25 |
| F6RDS0 | E3 ubiquitin-protein ligase UBR3 (Fragment) OS=Mus musculus GN=Ubr3 PE=4 SV=1 - [F6RDS0_MOUSE]               | 2.32  | 4 | 1  | 1  | 2   | 0.90 | 1.11 | 1.23 | 1.06 | 1.17 | 1.07 | 1.17 | 1.06 | 1.17 | 1.10 | 1.22 | 1.18 | 1.31 | 56.25  | 5.34 |
| Q8CIP5 | Protein dispatched homolog 2 OS=Mus musculus GN=Disp2 PE=2 SV=1 - [DISP2_MOUSE]                              | 2.53  | 1 | 2  | 2  | 6   | 1.18 | 1.42 | 1.32 | 1.14 | 1.05 | 1.17 | 0.76 | 1.06 | 0.80 | 1.20 | 0.86 | 1.15 | 0.94 | 147.85 | 6.76 |



|          |                                                                                                                          |       |    |    |    |      |      |      |      |      |      |      |      |      |      |      |      |      |      |        |      |
|----------|--------------------------------------------------------------------------------------------------------------------------|-------|----|----|----|------|------|------|------|------|------|------|------|------|------|------|------|------|------|--------|------|
| Q99JP0   | Mitogen-activated protein kinase kinase kinase 3<br>OS=Mus musculus<br>GN=Map4k3 PE=1<br>SV=4 -<br>[M4K3_MOUSE]          | 1.34  | 2  | 1  | 1  | 3    | 0.95 | 0.96 | 1.00 | 0.87 | 0.91 | 1.14 | 1.19 | 1.06 | 1.11 | 0.89 | 0.94 | 1.07 | 1.12 | 101.05 | 7.64 |
| P56388-2 | Isoform Short of Cocaine- and amphetamine-regulated transcript protein<br>OS=Mus musculus<br>GN=Cartpt -<br>[CART_MOUSE] | 37.07 | 2  | 4  | 4  | 12   | 1.84 | 1.01 | 0.51 | 0.95 | 0.46 | 1.25 | 0.60 | 1.06 | 0.57 | 1.59 | 0.87 | 1.79 | 0.90 | 12.80  | 8.25 |
| Q61112   | 45 kDa calcium-binding protein<br>OS=Mus musculus<br>GN=Sdf4 PE=2 SV=1 -<br>[CAB45_MOUSE]                                | 48.48 | 2  | 16 | 16 | 58   | 0.99 | 0.70 | 0.73 | 0.78 | 0.82 | 1.18 | 1.21 | 1.06 | 1.13 | 0.92 | 0.95 | 0.81 | 0.81 | 42.04  | 4.96 |
| P62983   | Ubiquitin-40S ribosomal protein S27a<br>OS=Mus musculus<br>GN=Rps27a PE=1<br>SV=2 -<br>[RS27A_MOUSE]                     | 62.18 | 12 | 15 | 15 | 186  | 1.24 | 0.90 | 0.72 | 0.97 | 0.80 | 1.11 | 0.90 | 1.06 | 0.85 | 1.00 | 0.79 | 1.04 | 0.83 | 17.94  | 9.64 |
| Q8K221   | Arfaptin-2 OS=Mus musculus<br>GN=Arfp2 PE=2 SV=2 -<br>[ARFP2_MOUSE]                                                      | 10.85 | 2  | 3  | 3  | 6    | 1.21 | 1.21 | 1.04 | 1.06 | 0.91 | 1.21 | 1.02 | 1.06 | 0.90 | 1.23 | 1.04 | 1.10 | 0.98 | 37.75  | 5.87 |
| Q6URW6   | Isoform 2 of Myosin-14<br>OS=Mus musculus<br>GN=Myh14 -<br>[MYH14_MOUSE]                                                 | 22.24 | 5  | 27 | 36 | 86   | 0.98 | 1.09 | 1.07 | 1.03 | 1.10 | 0.99 | 0.97 | 1.06 | 1.07 | 1.07 | 1.10 | 1.10 | 1.14 | 227.62 | 5.55 |
| Q8BGW1   | Alpha-ketoglutarate-dependent dioxygenase FTO<br>OS=Mus musculus<br>GN=Fto PE=1 SV=1 -<br>[FTO_MOUSE]                    | 18.33 | 5  | 6  | 6  | 8    | 1.03 | 1.07 | 0.94 | 0.99 | 0.94 | 0.99 | 0.91 | 1.06 | 0.87 | 0.89 | 0.95 | 1.04 | 0.97 | 57.97  | 5.12 |
| Q9WTL7   | Acyl-protein thioesterase 2 OS=Mus musculus<br>GN=Lyp1a2 PE=1 SV=1 -<br>[LYPA2_MOUSE]                                    | 47.62 | 1  | 6  | 7  | 21   | 0.93 | 0.84 | 0.88 | 1.01 | 1.06 | 1.10 | 1.14 | 1.06 | 1.19 | 1.08 | 1.24 | 0.95 | 1.19 | 24.78  | 7.23 |
| Q14A16   | RNA pseudouridylate synthase domain-containing protein 3<br>OS=Mus musculus<br>GN=Rpus3 PE=2<br>SV=1 -<br>[RUSD3_MOUSE]  | 4.36  | 5  | 2  | 2  | 3    | 0.94 | 1.11 | 1.19 | 1.01 | 1.08 | 1.04 | 1.11 | 1.06 | 1.13 | 0.99 | 1.06 | 1.12 | 1.20 | 38.05  | 9.52 |
| P68372   | Tubulin beta-4B chain<br>OS=Mus musculus<br>GN=Tubb4b PE=1<br>SV=1 -<br>[TBB4B_MOUSE]                                    | 75.06 | 3  | 1  | 30 | 2072 | 0.99 | 0.86 | 0.90 | 1.01 | 1.07 | 1.08 | 1.10 | 1.06 | 1.11 | 1.08 | 1.10 | 1.01 | 1.05 | 49.80  | 4.89 |
| Q9QYF9   | Protein NDRG3<br>OS=Mus musculus<br>GN=Ndr3 PE=1<br>SV=1 -<br>[NDRG3_MOUSE]                                              | 37.07 | 3  | 8  | 9  | 51   | 0.97 | 1.09 | 1.11 | 1.03 | 1.07 | 1.05 | 1.07 | 1.06 | 1.04 | 1.04 | 1.11 | 1.09 | 1.03 | 41.53  | 5.25 |
| F8WH20   | Oxysterol-binding protein<br>OS=Mus musculus<br>GN=Osbp3 PE=2 SV=1 -<br>[F8WH20_MOUSE]                                   | 8.67  | 4  | 5  | 5  | 9    | 0.98 | 0.87 | 0.89 | 0.95 | 0.97 | 1.05 | 1.01 | 1.06 | 1.13 | 0.99 | 1.05 | 0.93 | 0.91 | 92.96  | 6.54 |

|        |                                                                                                         |       |    |   |   |     |      |      |      |      |      |      |      |      |      |      |      |      |      |        |       |
|--------|---------------------------------------------------------------------------------------------------------|-------|----|---|---|-----|------|------|------|------|------|------|------|------|------|------|------|------|------|--------|-------|
| Q6P542 | ATP-binding cassette sub-family F member 1 OS=Mus musculus GN=Abcf1 PE=1 SV=1 - [ABCF1_MOUSE]           | 16.49 | 1  | 9 | 9 | 18  | 1.00 | 0.89 | 1.13 | 1.12 | 1.10 | 1.00 | 1.13 | 1.06 | 1.18 | 1.02 | 1.03 | 0.95 | 0.97 | 94.89  | 6.51  |
| Q91WK5 | Glycine cleavage system H protein, mitochondrial OS=Mus musculus GN=Gcsh PE=1 SV=2 - [GCSH_MOUSE]       | 17.65 | 1  | 2 | 2 | 29  | 1.10 | 0.67 | 0.66 | 0.95 | 0.85 | 1.11 | 0.99 | 1.06 | 0.97 | 0.98 | 0.86 | 0.94 | 0.82 | 18.63  | 4.75  |
| Q8CAK3 | UPF0515 protein C19orf66 homolog OS=Mus musculus PE=2 SV=1 - [CS066_MOUSE]                              | 32.76 | 2  | 8 | 8 | 27  | 1.05 | 0.86 | 0.86 | 0.89 | 0.89 | 1.09 | 0.98 | 1.06 | 1.01 | 0.99 | 0.97 | 0.94 | 0.91 | 32.99  | 7.28  |
| Q6PHZ8 | Kv channel-interacting protein 4 OS=Mus musculus GN=Kcnp4 PE=1 SV=1 - [KCIP4_MOUSE]                     | 39.20 | 11 | 6 | 6 | 27  | 0.96 | 0.84 | 0.79 | 0.88 | 0.94 | 1.04 | 1.00 | 1.06 | 1.06 | 0.92 | 0.86 | 0.87 | 0.88 | 28.74  | 5.21  |
| D3YZR8 | Bcl2 antagonist of cell death OS=Mus musculus GN=Bad PE=2 SV=1 - [D3YZR8_MOUSE]                         | 50.00 | 5  | 5 | 5 | 14  | 1.00 | 1.01 | 1.18 | 0.89 | 0.89 | 1.15 | 1.19 | 1.06 | 1.06 | 0.99 | 1.08 | 0.95 | 0.95 | 19.33  | 6.11  |
| A2AIH8 | Pirin (Fragment) OS=Mus musculus GN=Pir PE=2 SV=1 - [A2AIH8_MOUSE]                                      | 7.51  | 2  | 2 | 2 | 2   | 0.87 | 0.73 | 0.84 | 0.83 | 0.96 | 1.13 | 1.30 | 1.06 | 1.22 | 1.06 | 1.22 | 0.98 | 1.13 | 27.93  | 6.92  |
| Q8CC31 | Mothers against decapentaplegic homolog 1 OS=Mus musculus GN=Smad1 PE=2 SV=1 - [Q8CC31_MOUSE]           | 12.77 | 4  | 2 | 2 | 4   | 1.04 | 1.00 | 0.96 | 0.97 | 0.93 | 0.88 | 0.84 | 1.06 | 1.02 | 1.08 | 1.04 | 1.14 | 1.09 | 26.43  | 8.29  |
| P56391 | Cytochrome c oxidase subunit 6B1 OS=Mus musculus GN=Cox6b1 PE=1 SV=2 - [CX6B1_MOUSE]                    | 75.58 | 1  | 8 | 8 | 350 | 1.00 | 0.97 | 0.96 | 0.97 | 0.97 | 0.98 | 0.99 | 1.06 | 1.06 | 0.95 | 0.96 | 0.99 | 1.02 | 10.06  | 8.72  |
| A3KG57 | Serine/arginine-rich splicing factor 12 (Fragment) OS=Mus musculus GN=Srsf12 PE=2 SV=1 - [A3KG57_MOUSE] | 20.69 | 2  | 3 | 5 | 14  | 1.12 | 1.21 | 1.01 | 0.93 | 0.88 | 1.13 | 1.00 | 1.06 | 1.09 | 1.18 | 1.03 | 1.13 | 1.01 | 30.35  | 11.58 |
| Q8R429 | Sarcoplasmic/endoplasmic reticulum calcium ATPase 1 OS=Mus musculus GN=Atp2a1 PE=2 SV=1 - [AT2A1_MOUSE] | 8.85  | 1  | 1 | 8 | 22  | 0.70 | 1.36 | 1.92 | 0.70 | 0.99 | 3.62 | 5.12 | 1.06 | 1.51 | 1.15 | 1.64 | 0.71 | 1.01 | 109.35 | 5.22  |
| Q99KU0 | Vacuole membrane protein 1 OS=Mus musculus GN=Vmp1 PE=2 SV=2 - [VMP1_MOUSE]                             | 9.11  | 2  | 2 | 2 | 3   | 1.14 | 1.30 | 1.14 | 1.22 | 1.07 | 1.00 | 0.87 | 1.06 | 0.93 | 1.07 | 0.94 | 1.08 | 0.95 | 45.93  | 6.95  |
| D3Z111 | Acyl-protein thioesterase 1 OS=Mus musculus GN=Lyp1a1 PE=2 SV=1 - [D3Z111_MOUSE]                        | 13.27 | 7  | 2 | 2 | 4   | 0.86 | 0.90 | 1.04 | 1.05 | 1.22 | 1.00 | 1.15 | 1.07 | 1.23 | 1.01 | 1.17 | 0.94 | 1.09 | 21.14  | 6.18  |

|          |                                                                                                               |       |   |    |    |    |      |      |      |      |      |      |      |      |      |      |      |      |      |        |      |
|----------|---------------------------------------------------------------------------------------------------------------|-------|---|----|----|----|------|------|------|------|------|------|------|------|------|------|------|------|------|--------|------|
| Q8CFP6   | DnaJ homolog subfamily C member 27 OS=Mus musculus GN=Dnajc27 PE=2 SV=1 - [DJC27_MOUSE]                       | 8.42  | 1 | 2  | 2  | 2  | 1.23 | 1.13 | 0.92 | 1.31 | 1.07 | 1.29 | 1.04 | 1.07 | 0.86 | 0.95 | 0.77 | 1.01 | 0.83 | 30.81  | 8.47 |
| Q6POX2-2 | Isoform 2 of Zinc finger protein 511 OS=Mus musculus GN=Znf511 - [ZNF511_MOUSE]                               | 5.20  | 1 | 1  | 1  | 2  | 1.05 | 0.93 | 0.89 | 0.99 | 0.95 | 1.08 | 1.03 | 1.07 | 1.01 | 0.99 | 0.95 | 1.15 | 1.10 | 28.27  | 7.15 |
| Q9CR16   | Peptidyl-prolyl cis-trans isomerase D OS=Mus musculus GN=Ppid PE=1 SV=3 - [PPID_MOUSE]                        | 47.03 | 1 | 17 | 18 | 61 | 0.98 | 0.82 | 0.84 | 0.94 | 0.93 | 1.05 | 1.08 | 1.07 | 1.06 | 1.05 | 0.99 | 0.97 | 0.99 | 40.72  | 7.43 |
| B0QZX9   | Dephospho-CoA kinase domain-containing protein (Fragment) OS=Mus musculus GN=Dcakd PE=2 SV=1 - [B0QZX9_MOUSE] | 11.43 | 2 | 1  | 1  | 1  | 1.37 | 1.23 | 0.90 | 1.24 | 0.91 | 1.22 | 0.89 | 1.07 | 0.78 | 0.98 | 0.72 | 1.04 | 0.76 | 11.85  | 8.21 |
| Q8CI75   | DIS3-like exonuclease 2 OS=Mus musculus GN=Dis3l2 PE=1 SV=1 - [Dl3L2_MOUSE]                                   | 7.82  | 2 | 5  | 5  | 9  | 0.91 | 1.04 | 1.14 | 1.00 | 1.12 | 0.91 | 1.12 | 1.07 | 1.15 | 0.99 | 1.14 | 0.95 | 1.00 | 97.71  | 5.90 |
| Q505B7-2 | Isoform 2 of Protein archease OS=Mus musculus GN=Zbtb80s - [ARCH_MOUSE]                                       | 4.79  | 3 | 1  | 1  | 3  | 0.88 | 0.76 | 0.86 | 0.79 | 0.90 | 1.10 | 1.24 | 1.07 | 1.21 | 0.94 | 1.08 | 0.97 | 1.11 | 17.20  | 4.68 |
| H7BWY2   | AP-3 complex subunit mu-1 OS=Mus musculus GN=Ap3m1 PE=2 SV=1 - [H7BWY2_MOUSE]                                 | 7.69  | 2 | 1  | 2  | 2  | 0.64 | 0.75 | 1.17 | 1.22 | 1.90 | 0.73 | 1.14 | 1.07 | 1.66 | 0.49 | 0.77 | 0.95 | 1.49 | 41.00  | 8.25 |
| P97379   | Ras GTPase-activating protein-binding protein 2 OS=Mus musculus GN=G3bp2 PE=1 SV=2 - [G3BP2_MOUSE]            | 33.61 | 2 | 12 | 12 | 38 | 1.03 | 0.83 | 0.83 | 0.87 | 0.89 | 1.12 | 1.07 | 1.07 | 1.06 | 0.96 | 0.96 | 0.98 | 0.99 | 54.05  | 5.62 |
| P59326   | YTH domain family protein 1 OS=Mus musculus GN=Ythdf1 PE=2 SV=1 - [YTHD1_MOUSE]                               | 10.20 | 2 | 4  | 5  | 17 | 0.88 | 0.92 | 1.10 | 0.96 | 1.06 | 1.03 | 1.10 | 1.07 | 1.18 | 0.92 | 1.02 | 0.91 | 1.10 | 60.84  | 8.95 |
| Q5XJY5   | Coatomer subunit delta OS=Mus musculus GN=Aren1 PE=2 SV=2 - [COPD_MOUSE]                                      | 14.87 | 1 | 6  | 6  | 12 | 1.00 | 0.90 | 0.94 | 1.03 | 1.05 | 0.97 | 0.97 | 1.07 | 1.03 | 1.06 | 1.08 | 1.09 | 1.02 | 57.19  | 6.21 |
| Q6DID3   | Protein SCAF8 OS=Mus musculus GN=Scaf8 PE=1 SV=1 - [SCAF8_MOUSE]                                              | 5.91  | 1 | 4  | 4  | 6  | 0.90 | 0.75 | 0.83 | 1.02 | 1.01 | 1.08 | 1.12 | 1.07 | 1.16 | 0.94 | 0.98 | 0.91 | 0.95 | 139.49 | 8.24 |
| P62774   | Myotrophin OS=Mus musculus GN=Mtpn PE=1 SV=2 - [MTPN_MOUSE]                                                   | 83.05 | 1 | 9  | 9  | 73 | 1.02 | 0.77 | 0.72 | 0.89 | 0.92 | 1.12 | 1.11 | 1.07 | 0.99 | 0.94 | 0.93 | 0.86 | 0.88 | 12.85  | 5.52 |
| G3X9K4   | SAPS domain family, member 2, isoform CRA_a OS=Mus musculus GN=Ppp6r2 PE=4 SV=1 - [G3X9K4_MOUSE]              | 7.91  | 2 | 5  | 5  | 17 | 0.92 | 1.14 | 1.10 | 0.96 | 1.04 | 0.94 | 1.03 | 1.07 | 1.05 | 0.97 | 1.00 | 0.97 | 0.98 | 100.40 | 4.82 |

|          |                                                                                                                       |       |   |    |    |     |      |      |      |      |      |      |      |      |      |      |      |      |      |        |      |
|----------|-----------------------------------------------------------------------------------------------------------------------|-------|---|----|----|-----|------|------|------|------|------|------|------|------|------|------|------|------|------|--------|------|
| Q8B184   | Melanoma inhibitory activity protein 3<br>OS=Mus musculus<br>GN=Mia3 PE=1 SV=2<br>-[MIA3_MOUSE]                       | 17.15 | 5 | 23 | 23 | 43  | 0.99 | 1.02 | 1.00 | 1.02 | 1.00 | 1.01 | 1.03 | 1.07 | 1.08 | 1.04 | 1.04 | 0.98 | 0.97 | 213.54 | 4.75 |
| A2AR60   | Protein CASC4 (Fragment)<br>OS=Mus musculus<br>GN=Casc4 PE=2 SV=1<br>-[A2AR60_MOUSE]                                  | 14.61 | 5 | 3  | 3  | 7   | 1.03 | 0.87 | 0.84 | 0.98 | 0.95 | 1.11 | 1.06 | 1.07 | 1.01 | 1.01 | 1.01 | 0.95 | 0.98 | 30.54  | 6.24 |
| P84086   | Complexin-2 OS=Mus musculus<br>GN=Cplx2 PE=1 SV=1<br>-[CPLX2_MOUSE]                                                   | 66.42 | 1 | 5  | 8  | 175 | 0.94 | 0.71 | 0.81 | 0.89 | 0.96 | 1.08 | 1.11 | 1.07 | 1.15 | 1.04 | 1.11 | 0.87 | 1.00 | 15.38  | 5.08 |
| F6VJ09   | Breast carcinoma-amplified sequence 3 homolog (Fragment)<br>OS=Mus musculus<br>GN=Beas3 PE=4 SV=1<br>-[F6VJ09_MOUSE]  | 23.26 | 1 | 1  | 2  | 5   | 1.01 | 0.79 | 0.78 | 0.84 | 0.84 | 1.12 | 1.11 | 1.07 | 1.05 | 0.92 | 0.92 | 0.84 | 0.83 | 9.40   | 9.57 |
| Q9ESE1-3 | Isoform 3 of Lipopolysaccharide-responsive and beige-like anchor protein<br>OS=Mus musculus<br>GN=Lrba - [LRBA_MOUSE] | 2.64  | 4 | 1  | 6  | 11  | 1.33 | 2.16 | 1.63 | 1.11 | 0.83 | 0.89 | 0.66 | 1.07 | 0.80 | 1.18 | 0.89 | 1.34 | 1.01 | 286.27 | 5.66 |
| Q61879   | Myosin-10 OS=Mus musculus<br>GN=Myh10 PE=1 SV=2<br>-[MYH10_MOUSE]                                                     | 48.18 | 7 | 73 | 91 | 468 | 0.94 | 0.93 | 1.00 | 1.07 | 1.13 | 1.02 | 1.08 | 1.07 | 1.09 | 1.03 | 1.11 | 1.03 | 1.11 | 228.85 | 5.54 |
| Q923D4   | Splicing factor 3B subunit 5 OS=Mus musculus<br>GN=SF3b5 PE=2 SV=1<br>-[SF3B5_MOUSE]                                  | 55.81 | 1 | 4  | 4  | 10  | 0.86 | 0.91 | 1.03 | 0.91 | 1.03 | 1.10 | 1.13 | 1.07 | 1.15 | 0.94 | 1.04 | 0.89 | 1.04 | 10.11  | 6.35 |
| Q91YD9   | Neural Wiskott-Aldrich syndrome protein OS=Mus musculus<br>GN=Wasl PE=1 SV=1<br>-[WASL_MOUSE]                         | 42.71 | 2 | 15 | 15 | 81  | 1.04 | 0.95 | 0.94 | 1.00 | 0.95 | 1.00 | 0.99 | 1.07 | 1.03 | 0.98 | 0.97 | 0.92 | 0.89 | 54.24  | 7.93 |
| Q8CH77-2 | Isoform 2 of Neuron navigator 1 OS=Mus musculus<br>GN=Nav1 - [NAV1_MOUSE]                                             | 11.68 | 4 | 15 | 15 | 35  | 1.08 | 0.88 | 0.80 | 1.02 | 0.93 | 1.10 | 1.08 | 1.07 | 1.01 | 1.13 | 1.08 | 1.00 | 0.93 | 195.78 | 8.13 |
| Q8VCQ3   | Nuclear receptor-binding factor 2 OS=Mus musculus<br>GN=Nrbf2 PE=1 SV=1<br>-[NRBF2_MOUSE]                             | 33.45 | 1 | 6  | 6  | 18  | 1.05 | 0.88 | 0.88 | 0.90 | 0.89 | 1.13 | 1.14 | 1.07 | 1.04 | 0.94 | 0.97 | 0.97 | 0.89 | 32.48  | 5.76 |
| Q8K1Z0   | Ubiquinone biosynthesis protein COQ9, mitochondrial OS=Mus musculus<br>GN=Coq9 PE=1 SV=1<br>-[COQ9_MOUSE]             | 22.04 | 2 | 5  | 5  | 53  | 0.93 | 1.02 | 1.02 | 0.86 | 0.94 | 1.06 | 1.13 | 1.07 | 1.16 | 0.99 | 1.02 | 0.94 | 1.07 | 35.06  | 5.92 |
| Q8BMP4   | G-protein coupled estrogen receptor 1 OS=Mus musculus<br>GN=Gper PE=2 SV=2<br>-[GPER_MOUSE]                           | 7.20  | 1 | 1  | 1  | 1   | 1.09 | 0.85 | 0.78 | 0.99 | 0.91 | 1.07 | 0.97 | 1.07 | 0.97 | 1.06 | 0.97 | 1.09 | 1.00 | 42.45  | 7.65 |

|          |                                                                                                                                  |       |   |    |    |      |      |      |      |      |      |      |      |      |      |      |      |      |      |        |      |
|----------|----------------------------------------------------------------------------------------------------------------------------------|-------|---|----|----|------|------|------|------|------|------|------|------|------|------|------|------|------|------|--------|------|
| Q04447   | Creatine kinase B-type<br>OS=Mus musculus<br>GN=Ckb PE=1 SV=1 -<br>[KCRB_MOUSE]                                                  | 86.09 | 1 | 25 | 26 | 1392 | 0.95 | 1.01 | 1.06 | 1.00 | 1.04 | 1.06 | 1.10 | 1.07 | 1.12 | 1.02 | 1.07 | 1.02 | 1.09 | 42.69  | 5.67 |
| Q8R395   | COMM domain-<br>containing protein 5<br>OS=Mus musculus<br>GN=Comm5 PE=2<br>SV=1 -<br>[COMD5_MOUSE]                              | 7.59  | 1 | 1  | 1  | 2    | 1.35 | 1.82 | 1.34 | 1.39 | 1.03 | 1.23 | 0.91 | 1.07 | 0.79 | 1.24 | 0.92 | 2.06 | 1.53 | 24.48  | 8.06 |
| E9Q740   | Signal recognition<br>particle subunit SRP72<br>OS=Mus musculus<br>GN=Srp72 PE=2<br>SV=1 -<br>[E9Q740_MOUSE]                     | 13.11 | 2 | 4  | 5  | 9    | 0.77 | 1.05 | 1.17 | 1.20 | 1.21 | 0.82 | 1.00 | 1.07 | 1.39 | 1.06 | 1.12 | 0.98 | 1.13 | 67.89  | 9.38 |
| Q8BY87-2 | Isoform 2 of Ubiquitin<br>carboxyl-terminal<br>hydrolase 47 OS=Mus<br>musculus GN=Usp47 -<br>[UBP47_MOUSE]                       | 8.41  | 2 | 9  | 10 | 26   | 1.06 | 1.19 | 1.18 | 1.09 | 1.00 | 1.06 | 0.97 | 1.07 | 1.01 | 1.06 | 0.99 | 1.11 | 1.01 | 154.74 | 5.08 |
| Q8VDM6   | Heterogeneous nuclear<br>ribonucleoprotein U-<br>like protein 1 OS=Mus<br>musculus<br>GN=Hnrnp11 PE=1<br>SV=1 -<br>[HNRL1_MOUSE] | 13.74 | 3 | 7  | 7  | 30   | 0.99 | 1.02 | 0.83 | 1.02 | 0.93 | 1.02 | 0.91 | 1.07 | 1.05 | 1.04 | 1.05 | 1.11 | 1.01 | 95.94  | 6.58 |
| H3BJ08   | Protein<br>1700037C18Rik<br>(Fragment) OS=Mus<br>musculus<br>GN=1700037C18Rik<br>PE=2 SV=1 -<br>[H3BJ08_MOUSE]                   | 11.11 | 3 | 1  | 1  | 1    | 1.19 | 0.96 | 0.80 | 1.18 | 1.00 | 1.08 | 0.91 | 1.07 | 0.90 | 1.03 | 0.87 | 1.10 | 0.93 | 15.18  | 8.37 |
| E0CXF0   | E2F-associated<br>phosphoprotein<br>OS=Mus musculus<br>GN=Eapp PE=2 SV=1 -<br>[E0CXF0_MOUSE]                                     | 12.18 | 3 | 1  | 1  | 2    | 1.11 | 0.87 | 0.78 | 0.98 | 0.88 | 1.02 | 0.92 | 1.07 | 0.96 | 0.90 | 0.82 | 0.75 | 0.68 | 17.36  | 4.48 |
| Q80U78-2 | Isoform 2 of Pumilio<br>homolog 1 OS=Mus<br>musculus GN=Pum1 -<br>[PUM1_MOUSE]                                                   | 9.02  | 8 | 7  | 8  | 15   | 0.96 | 1.04 | 1.09 | 1.05 | 1.04 | 1.09 | 1.14 | 1.07 | 1.17 | 1.03 | 1.04 | 1.11 | 1.16 | 126.26 | 6.86 |
| Q9D7V9   | N-acylthanolamine-<br>hydrolyzing acid<br>amidase OS=Mus<br>musculus GN=Naaa<br>PE=2 SV=2 -<br>[NAAA_MOUSE]                      | 4.97  | 2 | 2  | 2  | 2    | 1.20 | 1.14 | 0.94 | 0.88 | 0.73 | 1.09 | 0.91 | 1.07 | 0.89 | 1.04 | 0.87 | 1.04 | 0.86 | 40.05  | 6.46 |
| Q9WTP6-  | Isoform 2 of Adenylate<br>kinase 2, mitochondrial<br>OS=Mus musculus<br>GN=Ak2 -<br>[KAD2_MOUSE]                                 | 44.83 | 3 | 8  | 8  | 19   | 0.90 | 0.85 | 0.91 | 1.05 | 1.05 | 1.02 | 1.09 | 1.07 | 1.12 | 1.08 | 1.14 | 1.08 | 1.08 | 25.59  | 7.42 |
| A2AUD5   | Tumor protein D54<br>OS=Mus musculus<br>GN=Tpd52i2 PE=2<br>SV=1 -<br>[A2AUD5_MOUSE]                                              | 66.38 | 3 | 4  | 14 | 82   | 1.04 | 0.86 | 0.84 | 0.86 | 0.87 | 1.10 | 1.08 | 1.07 | 0.98 | 1.13 | 1.08 | 1.03 | 0.99 | 25.05  | 6.55 |
| Q99LH4   | Zinc finger protein 672<br>OS=Mus musculus<br>GN=Znf672 PE=2<br>SV=1 -<br>[ZN672_MOUSE]                                          | 6.84  | 1 | 1  | 1  | 2    | 0.73 | 0.79 | 1.08 | 0.66 | 0.90 | 1.28 | 1.73 | 1.07 | 1.45 | 1.18 | 1.61 | 0.58 | 0.79 | 52.12  | 9.36 |

|          |                                                                                                         |       |   |    |    |     |      |      |      |      |      |      |      |      |      |      |      |      |      |        |      |
|----------|---------------------------------------------------------------------------------------------------------|-------|---|----|----|-----|------|------|------|------|------|------|------|------|------|------|------|------|------|--------|------|
| F8WJ31   | Zinc finger and SCAN domain-containing protein 26 OS=Mus musculus GN=Zscan26 PE=2 SV=1 - [F8WJ31_MOUSE] | 10.00 | 3 | 3  | 3  | 7   | 1.02 | 0.89 | 0.85 | 0.97 | 0.93 | 1.16 | 1.19 | 1.07 | 1.09 | 1.08 | 1.06 | 1.08 | 1.06 | 38.79  | 8.78 |
| Q00623   | Apolipoprotein A-I OS=Mus musculus GN=Apoa1 PE=1 SV=2 - [APOA1_MOUSE]                                   | 32.20 | 1 | 10 | 10 | 22  | 0.79 | 1.01 | 1.39 | 0.59 | 0.72 | 0.94 | 1.21 | 1.07 | 1.35 | 1.58 | 1.93 | 0.84 | 1.06 | 30.60  | 5.73 |
| Q3UH60   | Disco-interacting protein 2 homolog B OS=Mus musculus GN=Dip2b PE=1 SV=1 - [DIP2B_MOUSE]                | 14.49 | 3 | 5  | 19 | 43  | 0.93 | 1.17 | 1.13 | 1.01 | 1.12 | 1.12 | 1.31 | 1.07 | 1.13 | 1.05 | 1.26 | 0.96 | 1.00 | 171.02 | 8.09 |
| Q8C854-3 | Isoform 2 of Myelin expression factor 2 OS=Mus musculus GN=Myef2 - [MYEF2_MOUSE]                        | 25.96 | 8 | 13 | 13 | 38  | 0.92 | 0.92 | 1.05 | 1.01 | 1.08 | 1.06 | 1.17 | 1.07 | 1.19 | 1.05 | 1.13 | 0.98 | 1.07 | 61.69  | 8.87 |
| Q9CW03   | Structural maintenance of chromosomes protein 3 OS=Mus musculus GN=Smc3 PE=1 SV=2 - [SMC3_MOUSE]        | 9.78  | 1 | 10 | 10 | 27  | 1.00 | 1.17 | 1.19 | 1.01 | 1.05 | 1.01 | 1.02 | 1.07 | 1.26 | 1.16 | 1.15 | 1.28 | 1.20 | 141.47 | 7.18 |
| F7CD65   | Epsin-2 (Fragment) OS=Mus musculus GN=Epn2 PE=4 SV=1 - [F7CD65_MOUSE]                                   | 45.95 | 1 | 1  | 4  | 38  | 0.96 | 1.16 | 1.20 | 0.87 | 0.90 | 0.95 | 0.98 | 1.07 | 1.10 | 0.94 | 0.98 | 1.13 | 1.17 | 16.35  | 7.74 |
| Q9EQ80   | NIF3-like protein 1 OS=Mus musculus GN=Nif3l1 PE=1 SV=4 - [NIF3L_MOUSE]                                 | 18.62 | 2 | 5  | 5  | 11  | 1.01 | 1.24 | 1.29 | 1.06 | 1.06 | 0.90 | 0.92 | 1.07 | 1.05 | 1.08 | 1.11 | 1.12 | 1.16 | 41.72  | 6.76 |
| E9Q0A3   | Protein Arhgef1 (Fragment) OS=Mus musculus GN=Arhgef1 PE=2 SV=1 - [E9Q0A3_MOUSE]                        | 5.89  | 3 | 5  | 5  | 21  | 1.13 | 1.18 | 1.00 | 1.17 | 1.03 | 1.00 | 0.94 | 1.07 | 1.08 | 1.03 | 0.97 | 1.13 | 1.08 | 163.51 | 5.78 |
| D3Z6S1   | Transmembrane protein 214 OS=Mus musculus GN=Tmem214 PE=2 SV=1 - [D3Z6S1_MOUSE]                         | 2.65  | 2 | 1  | 2  | 2   | 1.04 | 0.85 | 0.82 | 1.12 | 1.08 | 1.01 | 0.97 | 1.07 | 1.03 | 1.13 | 1.09 | 1.05 | 1.02 | 71.26  | 9.41 |
| P56212-2 | Isoform ARPP-16 of cAMP-regulated phosphoprotein 19 OS=Mus musculus GN=Arpp19 - [ARPP19_MOUSE]          | 62.50 | 5 | 5  | 6  | 112 | 0.92 | 0.79 | 0.85 | 0.93 | 0.98 | 1.07 | 1.10 | 1.07 | 1.09 | 0.98 | 1.08 | 0.92 | 0.98 | 10.60  | 9.70 |
| P70271   | PDZ and LIM domain protein 4 OS=Mus musculus GN=Pdlim4 PE=1 SV=3 - [PDL4_MOUSE]                         | 30.30 | 3 | 7  | 7  | 18  | 1.11 | 0.99 | 0.97 | 1.04 | 0.92 | 1.09 | 1.01 | 1.07 | 0.98 | 1.02 | 1.00 | 1.11 | 1.05 | 35.53  | 8.05 |
| Q8R146-2 | Isoform 2 of Acylamino-acid-releasing enzyme OS=Mus musculus GN=Apeh - [APEH_MOUSE]                     | 8.37  | 2 | 4  | 4  | 8   | 1.21 | 1.24 | 1.05 | 1.21 | 0.97 | 1.10 | 0.90 | 1.07 | 0.88 | 1.13 | 0.96 | 1.27 | 1.03 | 79.91  | 5.54 |

|        |                                                                                                                    |       |   |    |    |     |      |      |      |      |      |      |      |      |      |      |      |      |      |        |      |
|--------|--------------------------------------------------------------------------------------------------------------------|-------|---|----|----|-----|------|------|------|------|------|------|------|------|------|------|------|------|------|--------|------|
| P62077 | Mitochondrial import inner membrane translocase subunit Tim8 B OS=Mus musculus GN=Timm8b PE=3 SV=1 - [TIM8B_MOUSE] | 56.63 | 1 | 4  | 4  | 11  | 0.98 | 0.95 | 0.93 | 0.95 | 1.00 | 1.05 | 1.09 | 1.07 | 1.17 | 1.02 | 1.05 | 1.03 | 1.01 | 9.28   | 5.12 |
| Q8CG72 | Poly(ADP-ribose) glycohydrolase ARH3 OS=Mus musculus GN=Adprhl2 PE=1 SV=1 - [ARHL2_MOUSE]                          | 12.97 | 2 | 4  | 4  | 9   | 1.05 | 1.09 | 1.24 | 1.06 | 1.04 | 0.99 | 0.94 | 1.07 | 1.07 | 1.07 | 0.94 | 1.16 | 1.16 | 39.39  | 4.96 |
| D3YXN7 | Tetraspanin-9 (Fragment) OS=Mus musculus GN=Tspan9 PE=2 SV=1 - [D3YXN7_MOUSE]                                      | 8.72  | 2 | 1  | 1  | 7   | 0.92 | 1.03 | 1.12 | 1.15 | 1.25 | 1.09 | 1.19 | 1.07 | 1.16 | 1.03 | 1.12 | 1.08 | 1.17 | 19.09  | 4.93 |
| Q0KK55 | Isoform 3 of Protein very KIND OS=Mus musculus GN=Kndc1 - [VKIND_MOUSE]                                            | 1.62  | 3 | 1  | 1  | 2   | 0.97 | 1.43 | 1.48 | 1.10 | 1.14 | 0.91 | 0.93 | 1.07 | 1.10 | 0.93 | 0.97 | 1.01 | 1.05 | 70.10  | 9.25 |
| Q8K352 | SAM and SH3 domain-containing protein 3 OS=Mus musculus GN=Sash3 PE=2 SV=2 - [SASH3_MOUSE]                         | 5.00  | 1 | 2  | 2  | 3   | 0.98 | 1.14 | 1.15 | 0.83 | 0.84 | 1.03 | 1.04 | 1.07 | 1.08 | 0.99 | 1.01 | 1.11 | 1.13 | 41.58  | 5.22 |
| Q3UHG5 | Tetraspanin-7 OS=Mus musculus GN=Tspan7 PE=2 SV=1 - [Q3UHG5_MOUSE]                                                 | 9.57  | 2 | 2  | 2  | 59  | 1.07 | 1.44 | 1.32 | 1.06 | 1.09 | 0.93 | 0.87 | 1.07 | 1.20 | 1.12 | 1.13 | 1.11 | 1.10 | 25.40  | 7.58 |
| E9QKH8 | Catenin delta-2 OS=Mus musculus GN=Ctnd2 PE=2 SV=1 - [E9QKH8_MOUSE]                                                | 35.55 | 3 | 31 | 33 | 133 | 1.01 | 1.08 | 1.07 | 1.01 | 1.00 | 1.03 | 1.03 | 1.07 | 1.07 | 1.07 | 1.05 | 1.06 | 1.04 | 134.86 | 7.65 |
| F6ZFU0 | Elongation factor 1-delta (Fragment) OS=Mus musculus GN=Eef1d PE=2 SV=1 - [F6ZFU0_MOUSE]                           | 49.64 | 5 | 2  | 23 | 112 | 1.44 | 0.97 | 0.66 | 0.92 | 0.63 | 1.37 | 0.97 | 1.07 | 0.90 | 1.12 | 0.70 | 1.22 | 0.80 | 61.35  | 7.39 |
| P21550 | Beta-enolase OS=Mus musculus GN=Eno3 PE=1 SV=3 - [ENOB_MOUSE]                                                      | 26.27 | 5 | 1  | 10 | 519 | 0.87 | 1.08 | 1.23 | 0.89 | 1.02 | 1.69 | 1.92 | 1.07 | 1.22 | 1.14 | 1.30 | 0.99 | 1.13 | 47.00  | 7.18 |
| Q5TYD6 | Serine/threonine-protein kinase LMTK2 OS=Mus musculus GN=Lmtk2 PE=1 SV=3 - [LMTK2_MOUSE]                           | 15.98 | 1 | 14 | 14 | 31  | 0.96 | 0.99 | 1.03 | 1.00 | 1.02 | 1.12 | 1.11 | 1.07 | 1.10 | 0.96 | 0.99 | 0.91 | 0.92 | 160.41 | 4.51 |
| A3KG01 | Eph receptor B2 OS=Mus musculus GN=Ephb2 PE=2 SV=2 - [A3KG01_MOUSE]                                                | 7.40  | 5 | 4  | 5  | 12  | 1.03 | 1.45 | 1.53 | 1.20 | 1.26 | 1.02 | 0.98 | 1.07 | 1.04 | 0.95 | 0.92 | 0.98 | 0.95 | 109.83 | 5.71 |
| P16014 | Secretogranin-1 OS=Mus musculus GN=Chgb PE=1 SV=2 - [SCG1_MOUSE]                                                   | 36.19 | 1 | 22 | 22 | 144 | 1.19 | 0.90 | 0.73 | 0.91 | 0.78 | 1.13 | 0.94 | 1.07 | 0.90 | 1.03 | 0.86 | 0.99 | 0.81 | 77.92  | 5.07 |

|          |                                                                                                         |       |    |    |    |     |      |      |      |      |      |      |      |      |      |      |      |      |      |        |      |
|----------|---------------------------------------------------------------------------------------------------------|-------|----|----|----|-----|------|------|------|------|------|------|------|------|------|------|------|------|------|--------|------|
| O35495-3 | Isoform 3 of Cyclin-dependent kinase 14<br>OS=Mus musculus<br>GN=Cdk14 -<br>[CDK14_MOUSE]               | 22.62 | 55 | 6  | 7  | 19  | 1.05 | 1.03 | 0.98 | 1.10 | 0.98 | 1.03 | 0.96 | 1.07 | 1.06 | 1.05 | 1.00 | 0.94 | 0.92 | 41.35  | 8.88 |
| Q9D219   | B-cell CLL/lymphoma 9 protein OS=Mus musculus<br>GN=Bcl9<br>PE=1 SV=3 -<br>[BCL9_MOUSE]                 | 7.16  | 1  | 6  | 6  | 12  | 1.10 | 0.90 | 0.87 | 0.83 | 0.82 | 1.12 | 1.07 | 1.07 | 1.01 | 1.06 | 1.05 | 0.97 | 1.00 | 148.87 | 8.91 |
| Q9Z2D6   | Methyl-CpG-binding protein 2 OS=Mus musculus<br>GN=Mecp2<br>PE=1 SV=1 -<br>[MECP2_MOUSE]                | 53.10 | 4  | 20 | 20 | 108 | 1.05 | 0.94 | 0.91 | 1.02 | 0.97 | 1.08 | 1.06 | 1.07 | 1.03 | 1.08 | 1.07 | 1.05 | 0.98 | 52.28  | 9.96 |
| P63044   | Vesicle-associated membrane protein 2<br>OS=Mus musculus<br>GN=Vamp2 PE=1<br>SV=2 -<br>[VAMP2_MOUSE]    | 43.10 | 2  | 2  | 6  | 133 | 1.03 | 1.20 | 1.16 | 1.00 | 0.98 | 0.98 | 0.95 | 1.07 | 1.00 | 1.06 | 0.98 | 1.13 | 1.09 | 12.68  | 8.13 |
| F6ZDT4   | Ribonuclease H2 subunit C (Fragment)<br>OS=Mus musculus<br>GN=Rnaseh2c PE=4<br>SV=1 -<br>[F6ZDT4_MOUSE] | 22.73 | 2  | 2  | 2  | 5   | 1.43 | 1.02 | 0.69 | 0.95 | 0.73 | 1.12 | 0.78 | 1.07 | 0.74 | 0.93 | 0.65 | 1.13 | 0.79 | 9.33   | 4.81 |
| P51830   | Adenylate cyclase type 9 OS=Mus musculus<br>GN=Adcy9 PE=1<br>SV=1 -<br>[ADCY9_MOUSE]                    | 20.62 | 2  | 19 | 20 | 36  | 0.97 | 1.16 | 1.27 | 1.09 | 1.15 | 0.94 | 0.99 | 1.07 | 1.08 | 1.00 | 1.04 | 0.90 | 0.99 | 150.86 | 7.21 |
| Q9WVA4   | Transgelin-2 OS=Mus musculus<br>GN=Tagln2<br>PE=1 SV=4 -<br>[TAGL2_MOUSE]                               | 62.81 | 1  | 9  | 10 | 40  | 0.94 | 0.97 | 0.98 | 0.85 | 0.94 | 1.07 | 1.11 | 1.07 | 1.19 | 1.03 | 1.14 | 1.03 | 1.19 | 22.38  | 8.24 |
| Q05186   | Reticulocalbin-1 OS=Mus musculus<br>GN=Rcn1 PE=1 SV=1<br>[RCN1_MOUSE]                                   | 42.15 | 1  | 11 | 11 | 43  | 1.25 | 0.89 | 0.73 | 0.97 | 0.77 | 1.09 | 0.92 | 1.07 | 0.93 | 1.16 | 0.95 | 1.24 | 1.04 | 38.09  | 4.84 |
| Q8K2C7   | Protein OS-9 OS=Mus musculus<br>GN=Os9<br>PE=1 SV=2 -<br>[OS9_MOUSE]                                    | 16.67 | 5  | 6  | 7  | 20  | 0.92 | 0.91 | 1.04 | 0.85 | 0.90 | 1.01 | 1.09 | 1.07 | 1.01 | 0.90 | 0.92 | 0.85 | 0.86 | 76.06  | 4.84 |
| Q64433   | 10 kDa heat shock protein, mitochondrial<br>OS=Mus musculus<br>GN=Hspe1 PE=1<br>SV=2 -<br>[CH10_MOUSE]  | 71.57 | 1  | 8  | 8  | 207 | 1.04 | 0.76 | 0.73 | 0.92 | 0.87 | 1.13 | 1.07 | 1.07 | 1.02 | 1.01 | 0.97 | 0.92 | 0.87 | 10.96  | 8.35 |
| Q9JL62   | Glycolipid transfer protein OS=Mus musculus<br>GN=Gltp<br>PE=2 SV=3 -<br>[GLTP_MOUSE]                   | 26.79 | 3  | 6  | 6  | 10  | 1.01 | 0.95 | 0.80 | 1.13 | 1.08 | 1.11 | 1.04 | 1.07 | 1.01 | 1.03 | 1.02 | 1.04 | 1.04 | 23.67  | 7.39 |
| O88834   | SH2 domain-containing adapter protein D OS=Mus musculus<br>GN=Shd<br>PE=1 SV=1 -<br>[SHD_MOUSE]         | 25.66 | 2  | 6  | 6  | 19  | 1.04 | 0.89 | 0.88 | 1.03 | 0.88 | 1.07 | 1.05 | 1.07 | 0.99 | 0.86 | 0.78 | 0.92 | 0.89 | 38.46  | 5.05 |
| G3X9J0   | MCG122846 OS=Mus musculus<br>GN=Sipa113<br>PE=4 SV=1 -<br>[G3X9J0_MOUSE]                                | 7.83  | 3  | 10 | 11 | 17  | 1.02 | 0.96 | 0.92 | 1.02 | 0.96 | 1.17 | 1.14 | 1.07 | 1.02 | 1.05 | 1.06 | 1.13 | 1.17 | 194.94 | 8.32 |



|          |                                                                                                                                 |       |   |   |    |    |      |      |      |      |      |      |      |      |      |      |      |      |      |        |      |
|----------|---------------------------------------------------------------------------------------------------------------------------------|-------|---|---|----|----|------|------|------|------|------|------|------|------|------|------|------|------|------|--------|------|
| Q9QXT8   | Calsenilin OS=Mus musculus GN=Kcnp3 PE=1 SV=2 - [CSEN_MOUSE]                                                                    | 20.70 | 3 | 1 | 4  | 9  | 0.97 | 1.10 | 1.13 | 0.90 | 0.92 | 1.08 | 1.11 | 1.07 | 1.10 | 1.05 | 1.08 | 1.08 | 1.11 | 29.44  | 5.69 |
| Q9CXV1   | Succinate dehydrogenase [ubiquinone] cytochrome b small subunit, mitochondrial OS=Mus musculus GN=Sdhb PE=2 SV=2 - [DHSD_MOUSE] | 21.38 | 1 | 1 | 1  | 2  | 1.36 | 0.99 | 0.73 | 1.59 | 1.17 | 0.98 | 0.72 | 1.07 | 0.79 | 1.13 | 0.84 | 0.97 | 0.71 | 17.00  | 9.10 |
| Q3ULB1   | Testin OS=Mus musculus GN=Tes PE=2 SV=1 - [Q3ULB1_MOUSE]                                                                        | 6.10  | 4 | 2 | 2  | 3  | 1.08 | 1.50 | 1.39 | 0.94 | 0.87 | 1.04 | 0.95 | 1.07 | 0.99 | 1.00 | 0.93 | 1.10 | 1.02 | 46.56  | 7.87 |
| Q7TSK2   | Isoform 2 of Seizure protein 6 OS=Mus musculus GN=Sez6 - [SEZ6_MOUSE]                                                           | 6.24  | 5 | 4 | 4  | 18 | 1.11 | 1.00 | 0.98 | 1.01 | 0.94 | 0.98 | 0.96 | 1.07 | 0.98 | 1.03 | 0.97 | 1.12 | 1.01 | 106.00 | 5.36 |
| Q6ZPS6   | Ankyrin repeat and IBR domain-containing protein 1 OS=Mus musculus GN=Ankib1 PE=1 SV=2 - [AKIB1_MOUSE]                          | 7.83  | 1 | 5 | 5  | 9  | 1.07 | 1.17 | 1.27 | 1.07 | 1.01 | 1.15 | 1.09 | 1.07 | 0.91 | 1.21 | 1.10 | 0.99 | 0.97 | 121.80 | 5.16 |
| Q61908   | Cx9C motif-containing protein 4 OS=Mus musculus GN=Cmc4 PE=2 SV=1 - [CMC4_MOUSE]                                                | 60.29 | 1 | 5 | 5  | 13 | 1.04 | 0.97 | 0.97 | 1.02 | 1.01 | 1.01 | 0.90 | 1.07 | 1.07 | 1.04 | 1.02 | 0.99 | 0.94 | 7.74   | 8.38 |
| Q64191   | N(4)-(beta-N-acetylglucosaminyloxy)-L-asparaginase OS=Mus musculus GN=Aga PE=2 SV=1 - [ASPG_MOUSE]                              | 4.34  | 1 | 1 | 1  | 1  | 1.09 | 1.32 | 1.21 | 0.90 | 0.83 | 1.36 | 1.25 | 1.07 | 0.98 | 1.25 | 1.15 | 1.69 | 1.55 | 37.00  | 6.44 |
| Q08943   | FACT complex subunit SSRP1 OS=Mus musculus GN=Ssrp1 PE=1 SV=2 - [SSRP1_MOUSE]                                                   | 15.96 | 3 | 8 | 8  | 47 | 1.00 | 1.06 | 1.17 | 1.06 | 1.03 | 0.99 | 0.97 | 1.07 | 1.08 | 0.97 | 0.99 | 0.94 | 0.99 | 80.81  | 6.76 |
| P97376   | Protein FRG1 OS=Mus musculus GN=Frg1 PE=1 SV=2 - [FRG1_MOUSE]                                                                   | 5.04  | 1 | 1 | 1  | 1  | 0.96 | 1.05 | 1.08 | 0.93 | 0.96 | 1.18 | 1.22 | 1.07 | 1.11 | 1.04 | 1.08 | 1.16 | 1.21 | 29.11  | 8.92 |
| A2A791-2 | Isoform 2 of Zinc finger MYM-type protein 4 OS=Mus musculus GN=Zmym4 - [ZMYM4_MOUSE]                                            | 0.62  | 2 | 1 | 1  | 1  | 1.11 | 0.86 | 0.78 | 0.94 | 0.85 | 1.20 | 1.08 | 1.07 | 0.96 | 1.06 | 0.95 | 1.04 | 0.94 | 162.74 | 6.54 |
| Q9CY58   | Isoform 3 of Plasminogen activator inhibitor 1 RNA-binding protein OS=Mus musculus GN=Serbp1 - [PAIRB_MOUSE]                    | 48.19 | 3 | 1 | 16 | 95 | 1.53 | 0.69 | 0.45 | 0.85 | 0.56 | 0.88 | 0.58 | 1.07 | 0.70 | 1.09 | 0.71 | 1.15 | 0.76 | 42.21  | 8.44 |
| G5E8T2   | E3 ubiquitin-protein ligase TTC3 OS=Mus musculus GN=Ttc3 PE=4 SV=1 - [G5E8T2_MOUSE]                                             | 4.75  | 8 | 7 | 7  | 12 | 1.11 | 0.91 | 0.87 | 1.00 | 0.89 | 1.14 | 1.00 | 1.07 | 1.02 | 1.14 | 1.01 | 1.04 | 0.94 | 223.77 | 6.25 |

|          |                                                                                                                                                    |       |   |    |    |    |      |      |      |      |      |      |      |      |      |      |      |      |      |        |       |      |
|----------|----------------------------------------------------------------------------------------------------------------------------------------------------|-------|---|----|----|----|------|------|------|------|------|------|------|------|------|------|------|------|------|--------|-------|------|
| B1B0F0   | U2 small nuclear ribonucleoprotein auxiliary factor 35 kDa subunit-related protein 2 (Fragment) OS=Mus musculus GN=Zsr2 PE=2 SV=1 - [B1B0F0_MOUSE] | 7.08  | 5 | 1  | 1  | 1  | 1    | 1.07 | 0.88 | 0.82 | 1.14 | 1.07 | 0.96 | 0.89 | 1.07 | 0.99 | 0.88 | 0.82 | 0.72 | 0.68   | 13.71 | 9.45 |
| P48428   | Tubulin-specific chaperone A OS=Mus musculus GN=Tbca PE=2 SV=3 - [TBCA_MOUSE]                                                                      | 49.07 | 1 | 8  | 8  | 88 | 0.94 | 0.75 | 0.84 | 0.92 | 0.99 | 1.08 | 1.09 | 1.07 | 1.17 | 1.02 | 1.14 | 0.97 | 1.02 | 12.75  | 5.27  |      |
| Q9ET38-2 | Isoform 2 of Claudin-19 OS=Mus musculus GN=Cldn19 - [CLD19_MOUSE]                                                                                  | 8.06  | 2 | 1  | 1  | 1  | 1.00 | 1.00 | 0.99 | 0.86 | 0.86 | 1.10 | 1.10 | 1.07 | 1.07 | 1.05 | 1.05 | 1.07 | 1.08 | 22.15  | 7.59  |      |
| Q4KL52   | Zfyve19 protein OS=Mus musculus GN=Zfyve19 PE=2 SV=1 - [Q4KL52_MOUSE]                                                                              | 32.42 | 2 | 7  | 7  | 37 | 1.08 | 0.90 | 0.89 | 0.90 | 0.86 | 1.14 | 1.08 | 1.07 | 1.01 | 1.06 | 1.05 | 0.99 | 0.98 | 36.30  | 7.81  |      |
| Q04888   | Transcription factor SOX-10 OS=Mus musculus GN=Sox10 PE=2 SV=2 - [SOX10_MOUSE]                                                                     | 1.93  | 1 | 1  | 1  | 2  | 1.24 | 1.36 | 1.09 | 0.98 | 0.79 | 1.36 | 1.09 | 1.07 | 0.86 | 1.13 | 0.91 | 1.44 | 1.16 | 49.92  | 6.60  |      |
| D3Z108   | Transmembrane and ubiquitin-like domain-containing protein 1 (Fragment) OS=Mus musculus GN=Tmub1 PE=2 SV=1 - [D3Z108_MOUSE]                        | 10.29 | 4 | 2  | 2  | 4  | 0.98 | 1.55 | 1.58 | 1.14 | 1.17 | 0.90 | 0.91 | 1.07 | 1.10 | 1.04 | 1.07 | 1.32 | 1.35 | 21.57  | 4.82  |      |
| G3XA57   | Protein Rab11fip2 OS=Mus musculus GN=Rab11fip2 PE=4 SV=1 - [G3XA57_MOUSE]                                                                          | 36.52 | 5 | 14 | 14 | 36 | 0.97 | 0.90 | 0.89 | 0.94 | 1.00 | 1.05 | 1.12 | 1.07 | 1.13 | 1.00 | 1.06 | 1.03 | 1.07 | 58.17  | 9.45  |      |
| Q55W75   | Protein phosphatase Slingshot homolog 2 OS=Mus musculus GN=Ssh2 PE=1 SV=2 - [SSH2_MOUSE]                                                           | 4.57  | 3 | 4  | 4  | 6  | 0.91 | 0.92 | 1.00 | 0.96 | 1.01 | 1.09 | 1.07 | 1.07 | 1.11 | 1.07 | 1.07 | 0.91 | 1.03 | 158.13 | 5.67  |      |
| Q9JHU2   | Palmdelphin OS=Mus musculus GN=Palmd PE=1 SV=1 - [PALMD_MOUSE]                                                                                     | 48.82 | 3 | 19 | 19 | 70 | 1.07 | 1.03 | 0.97 | 0.97 | 0.90 | 1.15 | 1.05 | 1.07 | 1.05 | 1.03 | 1.00 | 1.00 | 0.94 | 62.66  | 5.66  |      |
| Q8BNY6   | Neuronal calcium sensor 1 OS=Mus musculus GN=Ncs1 PE=2 SV=3 - [NCS1_MOUSE]                                                                         | 27.89 | 1 | 5  | 5  | 12 | 1.13 | 0.73 | 0.61 | 1.06 | 0.76 | 1.10 | 0.83 | 1.07 | 0.75 | 1.04 | 0.68 | 1.05 | 0.83 | 21.86  | 4.83  |      |
| Q923M0   | Protein phosphatase 1 regulatory subunit 16A OS=Mus musculus GN=Ppp1r16a PE=1 SV=1 - [PPI16A_MOUSE]                                                | 7.25  | 2 | 3  | 3  | 4  | 0.99 | 1.18 | 1.28 | 1.00 | 1.00 | 1.08 | 1.14 | 1.07 | 1.09 | 1.03 | 1.00 | 1.08 | 1.02 | 57.49  | 5.81  |      |
| P50608   | Fibromodulin OS=Mus musculus GN=Fmod PE=2 SV=1 - [FMOD_MOUSE]                                                                                      | 2.13  | 1 | 1  | 1  | 1  | 0.93 | 1.14 | 1.22 | 0.86 | 0.92 | 0.97 | 1.03 | 1.07 | 1.15 | 1.09 | 1.17 | 0.90 | 0.97 | 43.03  | 6.04  |      |

|        |                                                                                                                                 |       |   |    |    |     |      |      |      |      |      |      |      |      |      |      |      |      |      |        |      |
|--------|---------------------------------------------------------------------------------------------------------------------------------|-------|---|----|----|-----|------|------|------|------|------|------|------|------|------|------|------|------|------|--------|------|
| E9Q411 | Protein Nbas OS=Mus musculus GN=Nbas PE=2 SV=1 - [E9Q411_MOUSE]                                                                 | 0.47  | 1 | 1  | 1  | 1   | 1.03 | 1.20 | 1.16 | 1.15 | 1.12 | 0.90 | 0.87 | 1.07 | 1.04 | 1.06 | 1.03 | 0.93 | 0.90 | 265.61 | 5.95 |
| Q9WU28 | Prefoldin subunit 5 OS=Mus musculus GN=Pfdn5 PE=1 SV=1 - [PFD5_MOUSE]                                                           | 60.39 | 6 | 7  | 7  | 44  | 1.05 | 0.79 | 0.79 | 0.86 | 0.84 | 1.00 | 0.98 | 1.07 | 1.02 | 0.91 | 0.93 | 0.89 | 0.87 | 17.35  | 6.33 |
| Q9CQZ7 | DNA-directed RNA polymerase III subunit RPC10 OS=Mus musculus GN=Polr3k PE=2 SV=1 - [RPC10_MOUSE]                               | 21.30 | 1 | 2  | 2  | 7   | 1.07 | 1.21 | 1.20 | 0.98 | 1.00 | 1.13 | 1.11 | 1.07 | 1.02 | 1.11 | 1.05 | 1.10 | 1.04 | 12.32  | 7.83 |
| Q9JJY4 | Probable ATP-dependent RNA helicase DDX20 OS=Mus musculus GN=Ddx20 PE=1 SV=2 - [DDX20_MOUSE]                                    | 1.33  | 1 | 1  | 1  | 1   | 0.56 | 0.82 | 1.45 | 0.88 | 1.56 | 0.85 | 1.50 | 1.07 | 1.90 | 1.05 | 1.86 | 0.73 | 1.30 | 91.65  | 6.74 |
| O88704 | Potassium/sodium hyperpolarization-activated cyclic nucleotide-gated channel 1 OS=Mus musculus GN=Hcn1 PE=1 SV=1 - [HCN1_MOUSE] | 6.37  | 3 | 3  | 4  | 39  | 1.02 | 1.25 | 1.11 | 1.02 | 0.95 | 1.04 | 0.95 | 1.07 | 1.11 | 1.08 | 1.00 | 0.98 | 1.01 | 102.37 | 8.37 |
| Q8K0T0 | Reticulon-1 OS=Mus musculus GN=Rtn1 PE=1 SV=1 - [RTN1_MOUSE]                                                                    | 39.36 | 1 | 18 | 21 | 278 | 1.06 | 0.95 | 0.95 | 1.02 | 0.97 | 1.12 | 1.01 | 1.07 | 1.01 | 1.10 | 1.06 | 1.07 | 1.06 | 83.52  | 4.58 |
| P62313 | U6 snRNA-associated Sm-like protein LSM6 OS=Mus musculus GN=Lsm6 PE=2 SV=1 - [LSM6_MOUSE]                                       | 33.75 | 1 | 3  | 3  | 10  | 1.04 | 0.88 | 0.87 | 0.91 | 0.83 | 1.11 | 1.06 | 1.07 | 1.01 | 1.06 | 0.96 | 0.97 | 0.86 | 9.12   | 9.58 |
| F30875 | Somatostatin receptor type 2 OS=Mus musculus GN=Sstr2 PE=1 SV=1 - [SSR2_MOUSE]                                                  | 2.98  | 1 | 1  | 1  | 1   | 1.19 | 1.08 | 0.91 | 1.22 | 1.02 | 0.86 | 0.72 | 1.07 | 0.90 | 1.06 | 0.89 | 0.97 | 0.82 | 41.19  | 8.97 |
| Q3TJ55 | Syntaxin-2 OS=Mus musculus GN=Stx2 PE=2 SV=1 - [Q3TJ55_MOUSE]                                                                   | 12.50 | 4 | 2  | 3  | 16  | 1.08 | 1.23 | 1.13 | 1.03 | 0.95 | 1.03 | 1.00 | 1.07 | 1.02 | 0.99 | 0.91 | 1.12 | 1.17 | 33.18  | 6.21 |
| E9QA15 | Protein Cald1 OS=Mus musculus GN=Cald1 PE=2 SV=1 - [E9QA15_MOUSE]                                                               | 27.86 | 4 | 3  | 20 | 94  | 1.11 | 1.19 | 1.11 | 0.91 | 0.84 | 1.00 | 0.88 | 1.07 | 1.00 | 1.15 | 1.05 | 0.91 | 0.86 | 89.22  | 5.50 |
| Q9QXJ1 | Isoform 2 of Amyloid beta A4 precursor protein-binding family B member 1 OS=Mus musculus GN=Apbb1 - [APBB1_MOUSE]               | 11.72 | 2 | 5  | 5  | 11  | 1.08 | 1.16 | 0.99 | 1.16 | 0.99 | 1.17 | 1.07 | 1.07 | 0.98 | 1.02 | 0.97 | 1.07 | 1.05 | 77.07  | 4.97 |
| D6RDD4 | GDNF family receptor alpha-1 OS=Mus musculus GN=Gfra1 PE=2 SV=1 - [D6RDD4_MOUSE]                                                | 3.82  | 3 | 2  | 2  | 3   | 1.13 | 0.90 | 0.79 | 1.02 | 0.90 | 1.17 | 1.03 | 1.07 | 0.94 | 1.30 | 1.15 | 1.25 | 1.11 | 47.19  | 8.02 |

|        |                                                                                                                                     |       |   |    |    |     |      |      |      |      |      |      |      |      |      |      |      |      |      |        |      |
|--------|-------------------------------------------------------------------------------------------------------------------------------------|-------|---|----|----|-----|------|------|------|------|------|------|------|------|------|------|------|------|------|--------|------|
| Q8BM72 | Heat shock 70 kDa protein 13 OS=Mus musculus GN=Hspa13 PE=2 SV=1 - [HSP13_MOUSE]                                                    | 5.10  | 3 | 2  | 2  | 4   | 1.02 | 1.30 | 1.28 | 1.23 | 1.20 | 1.03 | 1.01 | 1.07 | 1.05 | 1.21 | 1.19 | 1.26 | 1.24 | 51.68  | 5.63 |
| Q6XLQ8 | Calumenin OS=Mus musculus GN=Calu PE=2 SV=1 - [Q6XLQ8_MOUSE]                                                                        | 69.84 | 5 | 5  | 17 | 188 | 1.08 | 0.74 | 0.75 | 0.93 | 0.93 | 1.11 | 1.01 | 1.07 | 0.98 | 0.93 | 1.00 | 0.91 | 0.81 | 37.09  | 4.59 |
| Q9CWC9 | Biogenesis of lysosome-related organelles complex 1 subunit 2 OS=Mus musculus GN=Blc1s2 PE=1 SV=1 - [BL1S2_MOUSE]                   | 37.76 | 1 | 7  | 7  | 19  | 1.12 | 0.88 | 0.80 | 0.90 | 0.90 | 1.17 | 0.97 | 1.07 | 0.93 | 1.05 | 0.96 | 1.11 | 0.98 | 16.29  | 4.88 |
| E9Q4M4 | Coiled-coil-helix-coiled-coil-helix domain-containing protein 6, mitochondrial OS=Mus musculus GN=Chchd6 PE=2 SV=1 - [E9Q4M4_MOUSE] | 46.12 | 2 | 13 | 13 | 70  | 0.98 | 0.97 | 1.02 | 0.93 | 0.99 | 1.12 | 1.16 | 1.07 | 1.13 | 1.08 | 1.10 | 1.02 | 1.07 | 26.37  | 8.62 |
| P59913 | Protein-L-isoaspartate O-methyltransferase domain-containing protein 1 OS=Mus musculus GN=Pcmd1 PE=2 SV=1 - [PCMD1_MOUSE]           | 5.32  | 1 | 2  | 2  | 2   | 1.10 | 1.25 | 1.13 | 1.14 | 1.04 | 1.01 | 0.91 | 1.08 | 0.97 | 1.07 | 0.97 | 1.20 | 1.09 | 40.67  | 5.66 |
| Q80U93 | Nuclear pore complex protein Nup214 OS=Mus musculus GN=Nup214 PE=1 SV=2 - [NU214_MOUSE]                                             | 4.89  | 6 | 7  | 8  | 14  | 0.86 | 1.01 | 1.17 | 0.99 | 1.03 | 1.06 | 1.14 | 1.08 | 1.26 | 1.06 | 1.19 | 0.95 | 1.04 | 212.85 | 7.08 |
| O08644 | Ephrin type-B receptor 6 OS=Mus musculus GN=Ephb6 PE=2 SV=4 - [EPHB6_MOUSE]                                                         | 2.07  | 2 | 1  | 2  | 3   | 0.88 | 1.22 | 1.38 | 1.22 | 1.38 | 0.99 | 1.12 | 1.08 | 1.22 | 1.01 | 1.15 | 1.05 | 1.19 | 110.04 | 6.83 |
| Q99N84 | 28S ribosomal protein S18b, mitochondrial OS=Mus musculus GN=Mrps18b PE=2 SV=1 - [RT18B_MOUSE]                                      | 27.56 | 5 | 3  | 3  | 5   | 0.96 | 0.76 | 0.79 | 0.92 | 0.95 | 0.89 | 0.93 | 1.08 | 1.22 | 0.98 | 1.02 | 0.86 | 0.90 | 28.68  | 8.35 |
| Q6P3D0 | U8 snoRNA-decapping enzyme OS=Mus musculus GN=Nudt16 PE=1 SV=1 - [NUD16_MOUSE]                                                      | 17.44 | 2 | 2  | 3  | 5   | 1.30 | 1.12 | 0.86 | 0.95 | 0.73 | 0.91 | 0.70 | 1.08 | 0.82 | 1.02 | 0.78 | 1.12 | 0.86 | 21.81  | 7.12 |
| Q3UXZ6 | Protein FAM81A OS=Mus musculus GN=Fam81a PE=2 SV=2 - [FA81A_MOUSE]                                                                  | 23.35 | 5 | 8  | 9  | 15  | 1.09 | 1.07 | 1.08 | 1.08 | 1.02 | 1.18 | 1.02 | 1.08 | 0.98 | 1.11 | 0.98 | 1.01 | 0.98 | 41.68  | 8.75 |
| P56213 | FAD-linked sulphydryl oxidase ALR OS=Mus musculus GN=Gfer PE=2 SV=2 - [ALR_MOUSE]                                                   | 33.33 | 1 | 6  | 6  | 17  | 0.95 | 0.87 | 1.03 | 0.90 | 1.02 | 1.03 | 1.13 | 1.08 | 1.10 | 0.97 | 1.05 | 0.83 | 1.08 | 22.86  | 7.93 |

|          |                                                                                          |       |   |    |    |    |      |      |      |      |      |      |      |      |      |      |      |      |      |        |      |
|----------|------------------------------------------------------------------------------------------|-------|---|----|----|----|------|------|------|------|------|------|------|------|------|------|------|------|------|--------|------|
| D6RGB6   | Uncharacterized protein OS=Mus musculus GN=Vps9d1 PE=2 SV=1 - [D6RGB6_MOUSE]             | 8.15  | 4 | 1  | 1  | 2  | 0.88 | 1.03 | 1.17 | 1.04 | 1.18 | 1.02 | 1.15 | 1.08 | 1.21 | 1.09 | 1.24 | 1.10 | 1.25 | 25.62  | 9.29 |
| Q9WV30   | Nuclear factor of activated T-cells 5 OS=Mus musculus GN=Nfat5 PE=2 SV=1 - [NFAT5_MOUSE] | 2.53  | 4 | 1  | 2  | 6  | 1.01 | 1.04 | 1.03 | 1.09 | 1.08 | 1.06 | 1.05 | 1.08 | 1.07 | 1.04 | 1.03 | 0.98 | 0.97 | 132.11 | 5.35 |
| Q99N28   | Cell adhesion molecule 3 OS=Mus musculus GN=Cadm3 PE=1 SV=1 - [CADM3_MOUSE]              | 39.90 | 2 | 11 | 11 | 78 | 1.00 | 0.99 | 0.98 | 1.03 | 1.06 | 0.99 | 0.99 | 1.08 | 1.07 | 0.99 | 1.01 | 0.99 | 1.00 | 42.94  | 5.80 |
| Q8R404   | Protein QIL1 OS=Mus musculus GN=Qil1 PE=2 SV=1 - [QIL1_MOUSE]                            | 42.86 | 1 | 4  | 4  | 9  | 1.06 | 1.09 | 1.11 | 1.16 | 1.07 | 1.20 | 1.12 | 1.08 | 0.99 | 1.24 | 1.09 | 1.21 | 1.05 | 13.36  | 8.63 |
| Q99KR6   | E3 ubiquitin-protein ligase RNF34 OS=Mus musculus GN=Rnf34 PE=1 SV=1 - [RNF34_MOUSE]     | 14.36 | 1 | 4  | 4  | 8  | 1.01 | 0.84 | 0.91 | 0.81 | 0.86 | 1.08 | 1.11 | 1.08 | 1.17 | 0.87 | 0.96 | 0.97 | 1.01 | 42.00  | 4.84 |
| P70388-4 | Isoform 4 of DNA repair protein RAD50 OS=Mus musculus GN=Rad50 - [RAD50_MOUSE]           | 2.42  | 6 | 1  | 1  | 1  | 0.97 | 1.11 | 1.14 | 0.92 | 0.94 | 1.26 | 1.29 | 1.08 | 1.10 | 0.89 | 0.91 | 0.99 | 1.03 | 57.55  | 8.16 |
| F8VQ11   | Rho GTPase-activating protein 23 OS=Mus musculus GN=Arhgap23 PE=2 SV=1 - [F8VQ11_MOUSE]  | 7.99  | 4 | 7  | 8  | 14 | 1.06 | 1.06 | 1.00 | 0.96 | 0.93 | 0.96 | 1.03 | 1.08 | 1.01 | 1.03 | 1.08 | 1.06 | 1.08 | 139.22 | 9.06 |
| Q922G2   | Protein FAM76A OS=Mus musculus GN=Fam76a PE=2 SV=1 - [FA76A_MOUSE]                       | 17.92 | 3 | 5  | 5  | 9  | 0.94 | 0.94 | 0.94 | 0.96 | 0.98 | 1.05 | 1.10 | 1.08 | 1.04 | 1.01 | 1.04 | 0.90 | 0.96 | 35.07  | 9.19 |
| Q8C0D7-  | Isoform 4 of Inhibitor of growth protein 4 OS=Mus musculus GN=Ing4 - [ING4_MOUSE]        | 6.02  | 5 | 1  | 1  | 1  | 1.05 | 1.03 | 0.97 | 1.00 | 0.95 | 1.17 | 1.11 | 1.08 | 1.02 | 1.07 | 1.02 | 1.29 | 1.23 | 19.16  | 8.47 |
| Q69ZW3-  | Isoform 2 of EH domain-binding protein 1 OS=Mus musculus GN=Ehbp1 - [EHBP1_MOUSE]        | 20.48 | 3 | 16 | 16 | 31 | 1.05 | 0.91 | 0.89 | 1.00 | 0.94 | 1.07 | 1.04 | 1.08 | 0.99 | 1.05 | 0.98 | 1.04 | 1.05 | 136.15 | 5.39 |
| E9PZ19   | Protein Igsf9b OS=Mus musculus GN=Igsf9b PE=2 SV=1 - [E9PZ19_MOUSE]                      | 6.55  | 2 | 6  | 6  | 15 | 1.04 | 1.27 | 1.22 | 1.15 | 1.08 | 0.99 | 1.02 | 1.08 | 1.06 | 0.98 | 0.99 | 0.85 | 0.91 | 144.86 | 6.70 |
| Q920M5   | Coronin-6 OS=Mus musculus GN=Coro6 PE=2 SV=1 - [CORO6_MOUSE]                             | 4.03  | 5 | 1  | 2  | 3  | 0.88 | 1.33 | 1.51 | 1.06 | 1.20 | 0.93 | 1.05 | 1.08 | 1.22 | 1.01 | 1.15 | 1.13 | 1.29 | 52.57  | 5.96 |
| Q8VDP2   | UPF0428 protein Cxorf56 homolog OS=Mus musculus PE=2 SV=1 - [CX056_MOUSE]                | 27.93 | 2 | 5  | 5  | 11 | 0.96 | 0.91 | 0.95 | 0.99 | 1.02 | 1.11 | 1.16 | 1.08 | 1.22 | 1.05 | 1.11 | 1.04 | 1.13 | 25.58  | 8.73 |

|          |                                                                                                                                          |       |    |    |    |     |      |      |      |      |      |      |      |      |      |      |      |      |      |        |      |
|----------|------------------------------------------------------------------------------------------------------------------------------------------|-------|----|----|----|-----|------|------|------|------|------|------|------|------|------|------|------|------|------|--------|------|
| E9PUF7   | Rho guanine nucleotide exchange factor 1<br>OS=Mus musculus<br>GN=Arhgef1 PE=2<br>SV=1 -<br>[E9PUF7_MOUSE]                               | 5.33  | 7  | 4  | 4  | 7   | 1.03 | 1.21 | 1.17 | 1.13 | 1.10 | 1.12 | 1.10 | 1.08 | 1.07 | 1.09 | 1.06 | 1.13 | 1.09 | 108.63 | 6.09 |
| D3Z6G3   | Microtubule-associated protein RP/EB family member 3 OS=Mus musculus GN=Mapre3<br>PE=2 SV=1 -<br>[D3Z6G3_MOUSE]                          | 38.72 | 2  | 1  | 10 | 47  | 0.97 | 1.02 | 1.05 | 1.08 | 1.11 | 1.14 | 1.18 | 1.08 | 1.11 | 1.12 | 1.16 | 1.15 | 1.19 | 30.35  | 5.30 |
| Q8VHP6   | Cadherin-related family member 1 OS=Mus musculus GN=Cdhr1<br>PE=1 SV=1 -<br>[CDHR1_MOUSE]                                                | 2.91  | 1  | 1  | 1  | 2   | 0.88 | 0.82 | 0.94 | 0.96 | 1.09 | 1.02 | 1.16 | 1.08 | 1.22 | 1.02 | 1.17 | 0.92 | 1.05 | 93.97  | 5.73 |
| E9Q8E3   | Protein Abi3bp<br>OS=Mus musculus<br>GN=Abi3bp PE=2<br>SV=1 -<br>[E9Q8E3_MOUSE]                                                          | 3.41  | 4  | 2  | 2  | 4   | 0.66 | 0.93 | 1.42 | 0.80 | 1.22 | 0.99 | 1.51 | 1.08 | 1.63 | 1.17 | 1.79 | 0.96 | 1.46 | 99.71  | 9.51 |
| Q9D1L0   | Coiled-coil-helix-coiled-coil-helix domain-containing protein 2, mitochondrial OS=Mus musculus GN=Chchd2<br>PE=1 SV=1 -<br>[CHCH2_MOUSE] | 30.72 | 3  | 4  | 4  | 72  | 0.98 | 0.98 | 1.10 | 0.86 | 0.94 | 1.08 | 1.10 | 1.08 | 1.08 | 1.00 | 1.00 | 0.92 | 0.96 | 15.65  | 9.66 |
| Q8C0V9-3 | Isoform 3 of FERM domain-containing protein 6 OS=Mus musculus GN=Frmd6 -<br>[FRMD6_MOUSE]                                                | 1.78  | 3  | 1  | 1  | 2   | 0.95 | 1.41 | 1.49 | 1.17 | 1.23 | 1.09 | 1.14 | 1.08 | 1.13 | 1.12 | 1.19 | 1.18 | 1.25 | 64.18  | 8.31 |
| E0CYM8   | Tyrosine-protein phosphatase non-receptor type substrate 1 OS=Mus musculus GN=Sirpa PE=4 SV=1<br>[E0CYM8_MOUSE]                          | 49.32 | 6  | 1  | 19 | 181 | 2.02 | 3.34 | 1.65 | 0.77 | 0.38 | 2.01 | 0.99 | 1.08 | 0.53 | 1.98 | 0.98 | 1.23 | 0.61 | 56.38  | 8.28 |
| Q80TH2-1 | Isoform 1 of Protein LAP2 OS=Mus musculus GN=Erbp2p -<br>[LAP2_MOUSE]                                                                    | 12.06 | 4  | 12 | 13 | 24  | 1.01 | 1.12 | 1.24 | 1.00 | 1.00 | 1.06 | 1.07 | 1.08 | 1.07 | 1.07 | 1.07 | 1.10 | 1.15 | 154.23 | 5.58 |
| Q8C145   | Zinc transporter ZIP6 OS=Mus musculus GN=Slc39a6 PE=1<br>SV=1 -<br>[S39A6_MOUSE]                                                         | 16.47 | 2  | 8  | 8  | 34  | 1.15 | 0.96 | 0.93 | 1.01 | 0.85 | 1.11 | 0.94 | 1.08 | 0.94 | 1.10 | 0.97 | 1.16 | 0.99 | 86.33  | 6.84 |
| P51949   | CDK-activating kinase assembly factor MAT1 OS=Mus musculus GN=Mnat1 PE=2<br>SV=2 -<br>[MAT1_MOUSE]                                       | 21.04 | 1  | 5  | 5  | 12  | 0.97 | 0.81 | 0.78 | 0.85 | 0.89 | 1.09 | 1.12 | 1.08 | 1.07 | 1.01 | 0.99 | 0.95 | 0.98 | 35.83  | 5.82 |
| H3BKF6   | Homeobox protein cut-like 1 OS=Mus musculus GN=Cux1<br>PE=2 SV=1 -<br>[H3BKF6_MOUSE]                                                     | 5.78  | 19 | 7  | 7  | 13  | 0.87 | 0.83 | 0.99 | 0.89 | 1.05 | 1.08 | 1.27 | 1.08 | 1.28 | 0.96 | 1.10 | 0.82 | 1.02 | 164.40 | 6.11 |

|          |                                                                                                                        |       |   |    |    |     |      |      |      |      |      |      |      |      |      |      |      |      |      |        |      |
|----------|------------------------------------------------------------------------------------------------------------------------|-------|---|----|----|-----|------|------|------|------|------|------|------|------|------|------|------|------|------|--------|------|
| E9Q5E1   | Protocadherin-19<br>OS=Mus musculus<br>GN=Pcdh19 PE=2<br>SV=1 -<br>[E9Q5E1_MOUSE]                                      | 4.92  | 3 | 5  | 5  | 9   | 1.26 | 1.43 | 1.18 | 1.16 | 0.98 | 1.21 | 0.97 | 1.08 | 0.97 | 1.19 | 0.94 | 1.28 | 1.04 | 120.75 | 5.40 |
| Q3UYC0   | Protein phosphatase 1H<br>OS=Mus musculus<br>GN=Ppm1h PE=1<br>SV=1 -<br>[PPM1H_MOUSE]                                  | 38.01 | 7 | 15 | 15 | 32  | 0.93 | 1.08 | 1.15 | 1.00 | 1.09 | 1.06 | 1.22 | 1.08 | 1.20 | 1.05 | 1.13 | 1.11 | 1.17 | 56.34  | 6.73 |
| G5E8J6   | Histidine rich calcium<br>binding protein,<br>isoform CRA_a<br>OS=Mus musculus<br>GN=Hrc PE=4 SV=1 -<br>[G5E8J6_MOUSE] | 4.47  | 1 | 2  | 2  | 4   | 0.75 | 1.22 | 1.63 | 0.49 | 0.65 | 6.25 | 8.29 | 1.08 | 1.43 | 1.10 | 1.47 | 0.90 | 1.20 | 85.12  | 4.63 |
| Q3UE37   | Ubiquitin-conjugating<br>enzyme E2 Z OS=Mus<br>musculus GN=Ube2z<br>PE=1 SV=2 -<br>[UBE2Z_MOUSE]                       | 14.04 | 1 | 4  | 4  | 5   | 1.12 | 0.93 | 0.83 | 1.16 | 1.00 | 0.96 | 0.89 | 1.08 | 0.97 | 0.95 | 0.87 | 1.19 | 1.12 | 38.34  | 5.62 |
| O35454   | Chloride transport<br>protein 6 OS=Mus<br>musculus GN=Clcn6<br>PE=1 SV=1 -<br>[CLCN6_MOUSE]                            | 7.47  | 3 | 4  | 4  | 5   | 1.24 | 1.28 | 1.11 | 1.15 | 0.96 | 1.01 | 0.88 | 1.08 | 0.94 | 1.31 | 1.06 | 0.78 | 0.69 | 96.92  | 7.02 |
| Q9R0L6   | Pericentriolar material<br>1 protein OS=Mus<br>musculus GN=Pcm1<br>PE=1 SV=2 -<br>[PCM1_MOUSE]                         | 5.58  | 2 | 9  | 9  | 24  | 1.02 | 0.96 | 1.03 | 0.93 | 0.89 | 1.09 | 1.07 | 1.08 | 1.11 | 1.02 | 1.00 | 0.99 | 1.08 | 228.71 | 5.01 |
| Q689Z5   | Protein strawberry<br>notch homolog 1<br>OS=Mus musculus<br>GN=Sbn1 PE=1<br>SV=2 -<br>[SBNO1_MOUSE]                    | 0.58  | 3 | 1  | 1  | 1   | 0.91 | 0.92 | 1.01 | 1.13 | 1.24 | 0.94 | 1.02 | 1.08 | 1.18 | 0.95 | 1.04 | 1.06 | 1.17 | 153.64 | 8.07 |
| M0QWP1   | Aggrin OS=Mus<br>musculus GN=Agm<br>PE=4 SV=1 -<br>[M0QWP1_MOUSE]                                                      | 15.59 | 4 | 22 | 22 | 51  | 0.99 | 1.01 | 1.06 | 0.98 | 0.95 | 0.99 | 1.00 | 1.08 | 1.01 | 0.96 | 0.97 | 0.97 | 0.97 | 216.51 | 6.15 |
| B9EHJ3   | Tight junction protein<br>ZO-1 OS=Mus<br>musculus GN=Tjp1<br>PE=2 SV=1 -<br>[B9EHJ3_MOUSE]                             | 34.48 | 2 | 39 | 39 | 132 | 0.95 | 0.92 | 0.96 | 0.91 | 0.95 | 1.06 | 1.10 | 1.08 | 1.16 | 0.97 | 1.04 | 0.91 | 0.94 | 188.74 | 6.67 |
| Q149L6-2 | Isoform 2 of Dnaj<br>homolog subfamily B<br>member 14 OS=Mus<br>musculus<br>GN=Dnajb14 -<br>[DJB14_MOUSE]              | 9.73  | 3 | 3  | 3  | 5   | 1.05 | 0.89 | 0.80 | 1.10 | 0.99 | 0.98 | 0.88 | 1.08 | 0.97 | 1.03 | 0.92 | 1.16 | 1.05 | 36.69  | 8.56 |
| P49443   | Protein phosphatase 1A<br>OS=Mus musculus<br>GN=Ppm1a PE=1<br>SV=1 -<br>[PPM1A_MOUSE]                                  | 48.43 | 1 | 13 | 16 | 61  | 0.94 | 0.84 | 0.93 | 0.90 | 0.98 | 1.12 | 1.19 | 1.08 | 1.15 | 1.00 | 1.10 | 0.93 | 1.08 | 42.41  | 5.36 |
| E9PUQ5   | Golgin subfamily A<br>member 2 OS=Mus<br>musculus GN=Golga2<br>PE=2 SV=1 -<br>[E9PUQ5_MOUSE]                           | 28.75 | 8 | 20 | 20 | 64  | 0.99 | 0.82 | 0.94 | 0.91 | 0.92 | 1.00 | 1.03 | 1.08 | 1.12 | 0.93 | 0.93 | 0.83 | 0.92 | 116.21 | 5.05 |

|          |                                                                                                                                          |       |    |    |    |     |      |      |      |      |      |      |      |      |      |      |      |      |      |        |      |
|----------|------------------------------------------------------------------------------------------------------------------------------------------|-------|----|----|----|-----|------|------|------|------|------|------|------|------|------|------|------|------|------|--------|------|
| Q80TL4   | Protein KIAA1045<br>OS=Mus musculus<br>GN=Kiaa1045 PE=1<br>SV=2 -<br>[K1045_MOUSE]                                                       | 42.00 | 2  | 4  | 16 | 97  | 0.97 | 0.98 | 1.00 | 1.05 | 1.07 | 1.13 | 1.22 | 1.08 | 1.13 | 1.02 | 1.04 | 0.97 | 1.00 | 45.19  | 5.77 |
| Q8BY19   | Tenascin-R OS=Mus<br>musculus GN=Tnr<br>PE=1 SV=2 -<br>[TENR_MOUSE]                                                                      | 43.00 | 2  | 43 | 43 | 500 | 0.99 | 0.98 | 0.99 | 0.94 | 0.96 | 1.04 | 1.05 | 1.08 | 1.09 | 1.00 | 1.01 | 0.99 | 1.01 | 149.49 | 4.94 |
| A2A5R8   | Double-stranded RNA-<br>binding protein Staufn<br>homolog 1 OS=Mus<br>musculus GN=Stau1<br>PE=2 SV=1 -<br>[A2A5R8_MOUSE]                 | 15.26 | 4  | 6  | 6  | 13  | 0.93 | 0.83 | 0.87 | 0.94 | 0.99 | 1.02 | 1.02 | 1.08 | 1.14 | 0.99 | 1.05 | 0.88 | 0.92 | 53.71  | 9.55 |
| E9QAT4   | Protein Sec16a<br>OS=Mus musculus<br>GN=Sec16a PE=2<br>SV=1 -<br>[E9QAT4_MOUSE]                                                          | 13.36 | 3  | 18 | 18 | 41  | 1.13 | 1.12 | 0.98 | 1.02 | 0.92 | 1.10 | 1.01 | 1.08 | 0.94 | 1.06 | 1.00 | 1.03 | 0.91 | 254.05 | 5.81 |
| Q9ES28-3 | Isoform C of Rho<br>guanine nucleotide<br>exchange factor 7<br>OS=Mus musculus<br>GN=Arhgef7 -<br>[ARHG7_MOUSE]                          | 37.74 | 10 | 20 | 22 | 52  | 0.96 | 0.96 | 1.02 | 0.93 | 1.00 | 0.98 | 1.02 | 1.08 | 1.10 | 0.97 | 1.03 | 0.97 | 1.06 | 88.89  | 6.28 |
| Q921U8-2 | Isoform L2 of<br>Smoothelin OS=Mus<br>musculus GN=Smtn -<br>[SMTN_MOUSE]                                                                 | 4.45  | 8  | 3  | 3  | 4   | 0.97 | 1.22 | 1.31 | 0.97 | 0.98 | 0.93 | 0.93 | 1.08 | 1.10 | 1.24 | 1.25 | 1.08 | 1.09 | 100.07 | 8.81 |
| A2ATT5   | ADP-sugar<br>pyrophosphatase<br>(Fragment) OS=Mus<br>musculus GN=Nudt5<br>PE=2 SV=1 -<br>[A2ATT5_MOUSE]                                  | 26.71 | 2  | 2  | 2  | 4   | 0.75 | 0.99 | 1.32 | 0.88 | 1.17 | 0.99 | 1.31 | 1.08 | 1.42 | 0.98 | 1.30 | 1.02 | 1.35 | 17.67  | 5.40 |
| Q812E0   | Cytoplasmic<br>polyadenylation<br>element-binding<br>protein 2 OS=Mus<br>musculus GN=Cpeb2<br>PE=1 SV=1 -<br>[CPEB2_MOUSE]               | 26.10 | 4  | 5  | 10 | 19  | 1.01 | 1.47 | 1.44 | 1.05 | 1.02 | 1.02 | 1.12 | 1.08 | 1.05 | 1.05 | 0.96 | 0.97 | 0.99 | 58.40  | 7.50 |
| Q9JJR8   | Transmembrane<br>protein 9B OS=Mus<br>musculus<br>GN=Tmem9b PE=1<br>SV=1 -<br>[TMM9B_MOUSE]                                              | 15.58 | 4  | 3  | 3  | 5   | 1.00 | 1.18 | 1.18 | 1.13 | 1.21 | 1.00 | 0.97 | 1.08 | 1.05 | 1.04 | 1.01 | 1.14 | 1.00 | 22.59  | 8.18 |
| G5E896   | Enhancer of mRNA<br>decapping 4, isoform<br>CRA_b OS=Mus<br>musculus GN=Ede4<br>PE=4 SV=1 -<br>[G5E896_MOUSE]                            | 4.91  | 5  | 5  | 5  | 7   | 1.15 | 1.41 | 1.22 | 1.26 | 1.10 | 1.08 | 0.94 | 1.08 | 0.93 | 1.09 | 0.95 | 1.09 | 0.96 | 152.39 | 5.82 |
| Q7TMY4-  | Isoform 2 of THO<br>complex subunit 7<br>homolog OS=Mus<br>musculus GN=Thoc7 -<br>[THOC7_MOUSE]                                          | 8.76  | 2  | 1  | 1  | 1   | 1.07 | 0.92 | 0.86 | 1.07 | 1.00 | 1.01 | 0.94 | 1.08 | 1.01 | 1.04 | 0.98 | 1.12 | 1.05 | 15.94  | 7.81 |
| Q9WVE8   | Protein kinase C and<br>casein kinase substrate<br>in neurons protein 2<br>OS=Mus musculus<br>GN=Pacsin2 PE=1<br>SV=1 -<br>[PACN2_MOUSE] | 30.66 | 1  | 13 | 14 | 114 | 0.97 | 0.81 | 0.85 | 0.81 | 0.91 | 0.96 | 0.98 | 1.08 | 1.05 | 0.89 | 0.89 | 0.87 | 0.91 | 55.80  | 5.20 |



|        |                                                                                                                    |       |   |    |    |     |      |      |      |      |      |      |      |      |      |      |      |      |      |        |      |
|--------|--------------------------------------------------------------------------------------------------------------------|-------|---|----|----|-----|------|------|------|------|------|------|------|------|------|------|------|------|------|--------|------|
| E9Q9U5 | Protein Ildr2 OS=Mus musculus GN=Ildr2 PE=2 SV=1 - [E9Q9U5_MOUSE]                                                  | 21.94 | 1 | 10 | 10 | 16  | 1.04 | 1.12 | 1.12 | 0.96 | 0.90 | 1.06 | 0.99 | 1.08 | 1.00 | 1.02 | 0.99 | 1.03 | 1.08 | 73.19  | 7.68 |
| Q9WV55 | Vesicle-associated membrane protein-associated protein A OS=Mus musculus GN=Vapa PE=1 SV=2 - [VAPA_MOUSE]          | 71.89 | 1 | 14 | 15 | 60  | 0.97 | 1.06 | 0.96 | 1.00 | 1.04 | 1.11 | 1.07 | 1.08 | 1.03 | 1.06 | 1.06 | 0.97 | 0.99 | 27.84  | 8.40 |
| F6TP58 | Protein Dchs1 (Fragment) OS=Mus musculus GN=Dchs1 PE=4 SV=1 - [F6TP58_MOUSE]                                       | 0.98  | 3 | 2  | 2  | 3   | 0.97 | 1.06 | 1.10 | 1.03 | 1.07 | 1.11 | 1.14 | 1.08 | 1.11 | 1.07 | 1.10 | 1.00 | 1.03 | 271.59 | 5.14 |
| Q5U3K5 | Rab-like protein 6 OS=Mus musculus GN=Rabl6 PE=1 SV=2 - [RABL6_MOUSE]                                              | 35.31 | 1 | 20 | 20 | 47  | 1.05 | 1.06 | 0.97 | 1.09 | 1.00 | 1.08 | 0.99 | 1.08 | 1.06 | 1.13 | 1.07 | 1.07 | 1.07 | 79.78  | 5.53 |
| E9PZB3 | Protein Gm5093 OS=Mus musculus GN=Gm5093 PE=3 SV=1 - [E9PZB3_MOUSE]                                                | 5.17  | 5 | 1  | 1  | 1   | 0.94 | 0.71 | 0.75 | 0.81 | 0.86 | 0.78 | 0.82 | 1.08 | 1.14 | 0.96 | 1.02 | 0.95 | 1.01 | 19.86  | 9.51 |
| Q80ZU5 | Coiled-coil domain-containing protein 181 OS=Mus musculus GN=Ccdc181 PE=2 SV=1 - [CC181_MOUSE]                     | 3.54  | 1 | 1  | 2  | 6   | 1.44 | 1.20 | 0.83 | 1.07 | 0.74 | 1.15 | 0.79 | 1.08 | 0.75 | 1.05 | 0.73 | 1.21 | 0.84 | 59.21  | 5.33 |
| Q91XH6 | Vesicle transport through interaction with t-SNAREs 1B homolog OS=Mus musculus GN=Vti1b PE=2 SV=1 - [Q91XH6_MOUSE] | 40.09 | 4 | 7  | 7  | 21  | 1.03 | 1.10 | 1.07 | 0.95 | 0.94 | 1.08 | 1.05 | 1.08 | 1.08 | 1.04 | 1.01 | 0.95 | 0.99 | 26.71  | 9.04 |
| P19536 | Cytochrome c oxidase subunit 5B, mitochondrial OS=Mus musculus GN=Cox5b PE=1 SV=1 - [COX5B_MOUSE]                  | 74.22 | 2 | 9  | 9  | 354 | 0.98 | 0.72 | 0.72 | 0.88 | 0.90 | 1.11 | 1.12 | 1.08 | 1.10 | 0.98 | 1.00 | 0.91 | 0.93 | 13.80  | 8.38 |
| D3YYP5 | Non-syndromic hearing impairment protein 5 homolog OS=Mus musculus GN=Dfina5 PE=2 SV=2 - [D3YYP5_MOUSE]            | 9.52  | 3 | 2  | 2  | 3   | 0.88 | 1.38 | 1.57 | 1.23 | 1.40 | 1.02 | 1.16 | 1.08 | 1.23 | 1.02 | 1.16 | 1.35 | 1.55 | 44.25  | 5.31 |
| F7CK47 | Microtubule-associated protein (Fragment) OS=Mus musculus GN=Map4 PE=4 SV=1 - [F7CK47_MOUSE]                       | 18.46 | 1 | 4  | 22 | 107 | 1.06 | 0.96 | 0.92 | 1.00 | 0.90 | 1.26 | 1.20 | 1.08 | 0.95 | 1.05 | 1.01 | 0.94 | 0.95 | 152.69 | 9.28 |
| Q6ZP10 | Testis-expressed sequence 2 protein OS=Mus musculus GN=Tex2 PE=1 SV=2 - [TEX2_MOUSE]                               | 4.43  | 3 | 3  | 3  | 5   | 0.98 | 1.09 | 1.08 | 1.01 | 1.06 | 0.99 | 0.95 | 1.08 | 1.06 | 1.07 | 1.08 | 0.95 | 0.94 | 125.15 | 5.80 |

|          |                                                                                                                    |       |    |    |    |    |      |      |      |      |      |      |      |      |      |      |      |      |      |        |       |
|----------|--------------------------------------------------------------------------------------------------------------------|-------|----|----|----|----|------|------|------|------|------|------|------|------|------|------|------|------|------|--------|-------|
| Q8CH09   | SURP and G-patch domain-containing protein 2 OS=Mus musculus GN=Supg2 PE=2 SV=2 - [SUGP2_MOUSE]                    | 6.47  | 4  | 6  | 6  | 9  | 0.99 | 1.21 | 1.27 | 1.09 | 1.15 | 1.07 | 1.10 | 1.08 | 1.08 | 1.06 | 1.15 | 1.06 | 1.09 | 118.03 | 8.31  |
| Q91XD2   | LIM and senescent cell antigen-like-containing domain protein 2 OS=Mus musculus GN=Lims2 PE=1 SV=1 - [LIMS2_MOUSE] | 13.20 | 1  | 1  | 4  | 9  | 1.16 | 0.92 | 0.80 | 0.92 | 0.80 | 1.12 | 0.96 | 1.08 | 0.93 | 1.01 | 0.88 | 0.97 | 0.84 | 39.00  | 7.97  |
| P83882   | 60S ribosomal protein L36a OS=Mus musculus GN=Rpl36a PE=2 SV=2 - [RL36A_MOUSE]                                     | 16.04 | 1  | 2  | 2  | 8  | 1.13 | 0.82 | 0.72 | 0.92 | 0.76 | 1.12 | 0.98 | 1.08 | 0.94 | 0.96 | 0.85 | 0.87 | 0.81 | 12.43  | 10.58 |
| Q9JKF7   | 39S ribosomal protein L39, mitochondrial OS=Mus musculus GN=Mrpl39 PE=2 SV=4 - [RM39_MOUSE]                        | 3.57  | 1  | 2  | 2  | 4  | 1.03 | 1.42 | 1.37 | 1.01 | 0.98 | 1.00 | 0.97 | 1.08 | 1.04 | 1.16 | 1.13 | 1.17 | 1.14 | 38.52  | 7.94  |
| Q60902-4 | Isoform 4 of Epidermal growth factor receptor substrate 15-like 1 OS=Mus musculus GN=Eps15l1 - [EP15R_MOUSE]       | 51.11 | 1  | 1  | 30 | 89 | 1.00 | 0.93 | 0.93 | 0.97 | 0.96 | 0.93 | 0.93 | 1.08 | 1.07 | 0.96 | 0.96 | 0.92 | 0.92 | 84.70  | 5.02  |
| O54946   | Dnaj homolog subfamily B member 6 OS=Mus musculus GN=Dnajb6 PE=1 SV=4 - [DNJB6_MOUSE]                              | 23.56 | 3  | 3  | 7  | 25 | 1.02 | 1.35 | 1.36 | 1.08 | 1.10 | 1.06 | 1.04 | 1.08 | 0.98 | 1.21 | 1.37 | 0.96 | 0.96 | 39.78  | 9.36  |
| P62830   | 60S ribosomal protein L23 OS=Mus musculus GN=Rpl23 PE=1 SV=1 - [RL23_MOUSE]                                        | 36.43 | 2  | 4  | 4  | 7  | 1.17 | 0.98 | 0.93 | 1.00 | 0.97 | 1.19 | 1.14 | 1.08 | 1.11 | 1.14 | 1.08 | 1.20 | 1.03 | 14.86  | 10.51 |
| A2AQ25   | Sickle tail protein OS=Mus musculus GN=Skt PE=1 SV=1 - [SKT_MOUSE]                                                 | 21.12 | 14 | 31 | 31 | 71 | 0.89 | 0.93 | 1.00 | 1.01 | 1.17 | 1.06 | 1.10 | 1.08 | 1.17 | 0.95 | 1.08 | 0.90 | 1.02 | 212.90 | 7.77  |
| Q9CPS8   | Small membrane A-kinase anchor protein OS=Mus musculus PE=1 SV=1 - [SMAKA_MOUSE]                                   | 12.26 | 1  | 1  | 1  | 3  | 1.24 | 0.90 | 0.72 | 1.02 | 0.82 | 1.44 | 1.15 | 1.08 | 0.87 | 1.03 | 0.83 | 1.02 | 0.82 | 11.92  | 4.25  |
| Q921W0   | Charged multivesicular body protein 1a OS=Mus musculus GN=Chmp1a PE=1 SV=1 - [CHM1A_MOUSE]                         | 12.24 | 1  | 3  | 3  | 9  | 0.98 | 0.92 | 0.99 | 0.95 | 0.89 | 1.15 | 1.17 | 1.08 | 0.95 | 1.03 | 0.97 | 0.99 | 0.87 | 21.59  | 8.06  |
| Q922U1   | U4/U6 small nuclear ribonucleoprotein Prp3 OS=Mus musculus GN=Prp3 PE=1 SV=1 - [PRPF3_MOUSE]                       | 15.52 | 2  | 7  | 7  | 10 | 1.02 | 1.00 | 0.94 | 0.96 | 0.94 | 1.23 | 1.11 | 1.08 | 1.16 | 0.98 | 0.95 | 0.94 | 0.98 | 77.41  | 9.50  |
| P69566   | Ran-binding protein 9 OS=Mus musculus GN=Ranbp9 PE=1 SV=1 - [RANB9_MOUSE]                                          | 13.32 | 3  | 5  | 5  | 14 | 1.02 | 1.01 | 1.15 | 1.06 | 1.02 | 0.96 | 0.95 | 1.08 | 1.03 | 1.02 | 0.95 | 1.13 | 1.15 | 70.97  | 6.84  |

|          |                                                                                                                             |       |    |   |    |    |      |      |      |      |      |      |      |      |      |      |      |      |      |        |      |
|----------|-----------------------------------------------------------------------------------------------------------------------------|-------|----|---|----|----|------|------|------|------|------|------|------|------|------|------|------|------|------|--------|------|
| E9QPH0   | cGMP-dependent protein kinase OS=Mus musculus GN=Prkg2 PE=2 SV=1 - [E9QPH0_MOUSE]                                           | 3.14  | 3  | 2 | 2  | 3  | 0.97 | 1.12 | 1.15 | 0.95 | 0.97 | 1.14 | 1.16 | 1.08 | 1.11 | 0.88 | 0.91 | 1.12 | 1.15 | 84.16  | 8.40 |
| P60191   | Regulating synaptic membrane exocytosis protein 4 OS=Mus musculus GN=Rims4 PE=2 SV=1 - [RIMS4_MOUSE]                        | 6.69  | 1  | 1 | 1  | 2  | 0.87 | 1.02 | 1.17 | 1.06 | 1.22 | 1.05 | 1.21 | 1.08 | 1.24 | 1.04 | 1.19 | 1.02 | 1.17 | 29.31  | 5.80 |
| Q8R2V3   | Zinc finger protein 445 OS=Mus musculus GN=Znf445 PE=2 SV=2 - [ZN445_MOUSE]                                                 | 3.14  | 1  | 1 | 1  | 2  | 1.00 | 0.87 | 0.87 | 0.87 | 0.87 | 0.94 | 0.93 | 1.08 | 1.08 | 1.01 | 1.01 | 0.91 | 0.92 | 114.70 | 9.32 |
| H7BWX9   | Small ubiquitin-related modifier 2 OS=Mus musculus GN=Sumo2 PE=2 SV=1 - [H7BWX9_MOUSE]                                      | 41.51 | 4  | 1 | 2  | 18 | 1.06 | 0.76 | 0.72 | 0.94 | 0.89 | 1.13 | 1.06 | 1.08 | 1.02 | 1.00 | 0.94 | 0.92 | 0.87 | 6.01   | 8.91 |
| Q9WU60   | Attractin OS=Mus musculus GN=Atrn PE=2 SV=3 - [ATRN_MOUSE]                                                                  | 1.61  | 1  | 2 | 2  | 4  | 1.10 | 1.08 | 0.98 | 1.08 | 0.98 | 0.97 | 0.87 | 1.08 | 0.98 | 0.90 | 0.82 | 0.87 | 0.80 | 157.95 | 7.27 |
| O88491   | Histone-lysine N-methyltransferase, H3 lysine-36 and H4 lysine-20 specific OS=Mus musculus GN=Nsd1 PE=1 SV=1 - [NSD1_MOUSE] | 0.35  | 2  | 1 | 1  | 2  | 1.04 | 1.14 | 1.09 | 0.95 | 0.92 | 1.02 | 0.97 | 1.08 | 1.03 | 1.01 | 0.97 | 0.97 | 0.93 | 283.91 | 7.90 |
| Q9DCZ1   | GMP reductase 1 OS=Mus musculus GN=Gmpr PE=2 SV=1 - [GMPR1_MOUSE]                                                           | 10.72 | 2  | 2 | 3  | 5  | 0.93 | 0.94 | 0.79 | 1.73 | 1.86 | 0.95 | 1.02 | 1.08 | 1.16 | 1.15 | 1.24 | 0.90 | 0.97 | 37.46  | 7.09 |
| P35922-9 | Isoform ISO9 of Fragile X mental retardation protein 1 homolog OS=Mus musculus GN=Fmr1 - [FMR1_MOUSE]                       | 20.95 | 18 | 7 | 10 | 18 | 0.88 | 0.99 | 1.08 | 0.99 | 1.12 | 1.01 | 1.12 | 1.08 | 1.19 | 0.87 | 1.01 | 1.01 | 1.09 | 64.06  | 8.53 |
| Q62313   | Trans-Golgi network integral membrane protein 1 OS=Mus musculus GN=Tgoln1 PE=1 SV=1 - [TGON1_MOUSE]                         | 8.50  | 2  | 2 | 2  | 3  | 1.09 | 0.90 | 0.82 | 1.01 | 0.93 | 1.03 | 0.94 | 1.08 | 0.99 | 1.00 | 0.92 | 1.01 | 0.93 | 37.83  | 5.34 |
| Q8CBH7   | Isoform 2 of E3 ubiquitin-protein ligase MARCH11 OS=Mus musculus GN=March11 - [MARHB_MOUSE]                                 | 5.56  | 3  | 1 | 1  | 2  | 1.01 | 0.98 | 0.97 | 0.96 | 0.95 | 1.00 | 0.99 | 1.08 | 1.07 | 1.11 | 1.10 | 1.06 | 1.05 | 27.14  | 7.33 |
| F2Z3U3   | Protein Raph1 (Fragment) OS=Mus musculus GN=Raph1 PE=2 SV=1 - [F2Z3U3_MOUSE]                                                | 17.71 | 5  | 8 | 10 | 24 | 0.96 | 1.05 | 0.96 | 1.06 | 1.02 | 1.01 | 1.02 | 1.08 | 1.03 | 1.01 | 0.98 | 1.03 | 1.01 | 66.93  | 6.07 |
| Q9WTV7   | E3 ubiquitin-protein ligase RLIM OS=Mus musculus GN=Rlim PE=1 SV=2 - [RNF12_MOUSE]                                          | 2.00  | 1  | 1 | 1  | 2  | 0.90 | 0.82 | 0.91 | 0.73 | 0.81 | 1.02 | 1.12 | 1.08 | 1.20 | 1.02 | 1.14 | 0.92 | 1.02 | 66.34  | 6.90 |

|          |                                                                                                                   |       |    |    |    |     |      |      |      |      |      |      |      |      |      |      |      |      |      |        |      |
|----------|-------------------------------------------------------------------------------------------------------------------|-------|----|----|----|-----|------|------|------|------|------|------|------|------|------|------|------|------|------|--------|------|
| Q6PH08   | ERC protein 2<br>OS=Mus musculus<br>GN=Erce2 PE=1 SV=2 -<br>[ERC2_MOUSE]                                          | 52.87 | 6  | 29 | 56 | 451 | 0.99 | 0.88 | 0.88 | 0.92 | 0.91 | 1.07 | 1.06 | 1.08 | 1.06 | 0.99 | 0.98 | 0.91 | 0.92 | 110.57 | 7.03 |
| Q6P616   | DNA-directed RNA<br>polymerase II subunit<br>GRINL1A OS=Mus<br>musculus GN=Polr2m<br>PE=2 SV=2 -<br>[GRL1A_MOUSE] | 10.66 | 3  | 3  | 3  | 7   | 1.23 | 1.02 | 0.83 | 0.88 | 0.83 | 1.16 | 1.11 | 1.08 | 0.87 | 1.10 | 0.89 | 1.06 | 0.73 | 41.21  | 6.55 |
| P46938-2 | Isoform 2 of Yorkie<br>homolog OS=Mus<br>musculus GN=Yap1 -<br>[YAP1_MOUSE]                                       | 24.36 | 6  | 6  | 6  | 15  | 0.99 | 1.05 | 1.13 | 1.01 | 1.00 | 1.08 | 1.11 | 1.08 | 1.24 | 1.11 | 1.13 | 0.92 | 1.09 | 50.67  | 5.00 |
| Q6DFV7   | Nuclear receptor<br>coactivator 7 OS=Mus<br>musculus GN=Ncoa7<br>PE=2 SV=2 -<br>[NCOA7_MOUSE]                     | 27.57 | 6  | 18 | 18 | 40  | 0.99 | 0.84 | 0.79 | 0.95 | 0.93 | 1.09 | 1.07 | 1.08 | 1.04 | 1.01 | 0.95 | 0.95 | 0.92 | 106.29 | 5.43 |
| P0C7M9   | C-type lectin domain<br>family 2 member L<br>OS=Mus musculus<br>GN=Clec2l PE=2<br>SV=1 -<br>[CLC2L_MOUSE]         | 4.27  | 1  | 1  | 1  | 2   | 1.09 | 1.47 | 1.35 | 1.17 | 1.07 | 0.92 | 0.84 | 1.08 | 0.99 | 1.08 | 1.00 | 1.35 | 1.24 | 23.64  | 7.20 |
| Q3UGS4   | Protein FAM195B<br>OS=Mus musculus<br>GN=Fam195b PE=1<br>SV=1 -<br>[F195B_MOUSE]                                  | 58.76 | 1  | 5  | 5  | 24  | 1.01 | 0.92 | 0.99 | 0.94 | 0.97 | 1.15 | 1.16 | 1.08 | 1.08 | 0.96 | 1.04 | 0.89 | 0.93 | 11.09  | 9.14 |
| Q61165   | Sodium/hydrogen<br>exchanger 1 OS=Mus<br>musculus GN=Slc9a1<br>PE=1 SV=1 -<br>[SL9A1_MOUSE]                       | 17.93 | 1  | 8  | 8  | 39  | 1.07 | 1.05 | 1.00 | 1.08 | 1.00 | 1.09 | 1.01 | 1.08 | 0.98 | 1.08 | 1.03 | 1.00 | 0.95 | 91.41  | 7.12 |
| Q9R1E0   | Forkhead box protein<br>O1 OS=Mus musculus<br>GN=Foxo1 PE=1<br>SV=2 -<br>[FOXO1_MOUSE]                            | 2.30  | 1  | 1  | 1  | 2   | 1.08 | 0.98 | 0.91 | 0.93 | 0.86 | 1.19 | 1.10 | 1.08 | 1.00 | 1.08 | 1.00 | 1.46 | 1.36 | 69.47  | 6.95 |
| Q78JW9   | Ubiquitin domain-<br>containing protein<br>UBFD1 OS=Mus<br>musculus GN=Ubf1<br>PE=1 SV=2 -<br>[UBFD1_MOUSE]       | 27.99 | 1  | 7  | 7  | 28  | 1.12 | 0.74 | 0.75 | 0.91 | 0.89 | 1.06 | 0.97 | 1.08 | 0.97 | 1.01 | 0.98 | 0.90 | 0.87 | 40.12  | 8.85 |
| A2AU91   | Tumor suppressor p53-<br>binding protein 1<br>OS=Mus musculus<br>GN=Trp53bp1 PE=2<br>SV=1 -<br>[A2AU91_MOUSE]     | 32.76 | 11 | 35 | 35 | 91  | 1.07 | 0.97 | 0.89 | 1.04 | 0.96 | 1.15 | 0.98 | 1.08 | 1.07 | 1.08 | 0.99 | 1.03 | 0.94 | 212.60 | 4.63 |
| Q80TS7   | Dendrin OS=Mus<br>musculus GN=Ddn<br>PE=1 SV=3 -<br>[DEND_MOUSE]                                                  | 5.49  | 1  | 3  | 3  | 6   | 0.97 | 1.06 | 0.99 | 1.07 | 1.13 | 1.05 | 0.99 | 1.08 | 1.01 | 0.95 | 0.89 | 0.90 | 0.92 | 76.36  | 9.98 |
| O89001   | Carboxypeptidase D<br>OS=Mus musculus<br>GN=Cpd PE=1 SV=2 -<br>[CBPD_MOUSE]                                       | 1.82  | 1  | 3  | 3  | 5   | 1.15 | 1.29 | 1.26 | 1.13 | 0.98 | 0.96 | 0.87 | 1.08 | 0.84 | 0.96 | 0.84 | 1.01 | 0.86 | 152.31 | 6.18 |
| Q9Z2Y3-5 | Isoform 5 of Homer<br>protein homolog 1<br>OS=Mus musculus<br>GN=Homer1 -<br>[HOME1_MOUSE]                        | 46.77 | 5  | 1  | 9  | 83  | 0.97 | 1.46 | 1.50 | 1.32 | 1.36 | 1.21 | 1.24 | 1.08 | 1.11 | 0.92 | 0.95 | 1.17 | 1.21 | 20.90  | 7.62 |

|          |                                                                                                                                |       |    |    |    |      |      |      |      |      |      |      |      |      |      |      |      |      |      |        |      |
|----------|--------------------------------------------------------------------------------------------------------------------------------|-------|----|----|----|------|------|------|------|------|------|------|------|------|------|------|------|------|------|--------|------|
| E9PV14   | Band 4.1-like protein 1 (Fragment) OS=Mus musculus GN=Epb4.111 PE=2 SV=1 - [E9PV14_MOUSE]                                      | 36.09 | 1  | 12 | 28 | 98   | 1.04 | 1.05 | 1.00 | 0.90 | 0.82 | 1.03 | 0.92 | 1.08 | 1.08 | 0.95 | 0.90 | 0.99 | 0.89 | 117.10 | 5.92 |
| P62627   | Dynein light chain roadblock-type 1 OS=Mus musculus GN=Dynlr1 PE=1 SV=3 - [DLRB1_MOUSE]                                        | 73.96 | 2  | 7  | 7  | 71   | 1.04 | 0.87 | 0.79 | 0.94 | 0.93 | 1.12 | 1.05 | 1.08 | 1.03 | 1.00 | 0.97 | 0.94 | 0.96 | 10.98  | 7.25 |
| Q8BKQ3   | Testican-1 OS=Mus musculus GN=Spoek1 PE=2 SV=1 - [Q8BKQ3_MOUSE]                                                                | 29.61 | 2  | 8  | 8  | 15   | 0.90 | 0.88 | 0.99 | 0.94 | 1.07 | 1.14 | 1.27 | 1.08 | 1.25 | 1.01 | 1.24 | 0.94 | 0.96 | 49.22  | 6.01 |
| Q8CE90-4 | Isoform 4 of Dual specificity mitogen-activated protein kinase 7 OS=Mus musculus GN=Map2k7 - [MP2K7_MOUSE]                     | 5.20  | 11 | 1  | 2  | 3    | 0.70 | 4.45 | 6.36 | 1.11 | 1.58 | 0.89 | 1.27 | 1.08 | 1.55 | 1.13 | 1.61 | 1.11 | 1.59 | 39.35  | 8.63 |
| P59708   | Pre-mRNA branch site protein p14 OS=Mus musculus GN=SF3b14 PE=2 SV=1 - [PM14_MOUSE]                                            | 11.20 | 1  | 1  | 1  | 3    | 0.94 | 0.85 | 0.90 | 1.03 | 1.09 | 0.98 | 1.03 | 1.08 | 1.14 | 0.99 | 1.05 | 1.02 | 1.09 | 14.58  | 9.38 |
| Q8C052   | Microtubule-associated protein 1S OS=Mus musculus GN=Map1s PE=1 SV=2 - [MAP1S_MOUSE]                                           | 8.94  | 1  | 7  | 7  | 12   | 1.04 | 1.14 | 1.11 | 1.01 | 1.03 | 1.03 | 1.07 | 1.08 | 1.08 | 1.03 | 1.09 | 1.16 | 1.13 | 102.88 | 7.02 |
| Q3TXN1   | Prostaglandin reductase 2 OS=Mus musculus GN=Pgr2 PE=2 SV=1 - [Q3TXN1_MOUSE]                                                   | 25.08 | 4  | 5  | 5  | 16   | 0.96 | 1.04 | 1.14 | 0.95 | 0.98 | 1.06 | 1.03 | 1.08 | 1.07 | 1.07 | 1.06 | 1.03 | 1.12 | 34.25  | 5.50 |
| H3BJI4   | RWD domain containing 4A, isoform CRA_b OS=Mus musculus GN=Rwdd4a PE=4 SV=1 - [H3BJI4_MOUSE]                                   | 45.45 | 3  | 2  | 2  | 6    | 1.03 | 0.98 | 0.90 | 0.92 | 0.93 | 1.06 | 1.23 | 1.08 | 1.16 | 1.02 | 1.06 | 0.94 | 0.92 | 5.03   | 4.64 |
| P63017   | Heat shock cognate 71 kDa protein OS=Mus musculus GN=Hspa8 PE=1 SV=1 - [HSP7C_MOUSE]                                           | 78.33 | 4  | 30 | 46 | 1182 | 0.93 | 0.81 | 0.91 | 0.95 | 1.03 | 1.05 | 1.14 | 1.08 | 1.14 | 1.02 | 1.11 | 0.96 | 1.05 | 70.83  | 5.52 |
| Q9D6J5   | NADH dehydrogenase [ubiquinone] 1 beta subcomplex subunit 8, mitochondrial OS=Mus musculus GN=Ndufb8 PE=1 SV=1 - [NDUB8_MOUSE] | 46.77 | 4  | 6  | 6  | 35   | 1.07 | 1.26 | 1.22 | 1.11 | 1.07 | 1.04 | 1.04 | 1.08 | 1.06 | 1.13 | 1.06 | 1.14 | 1.04 | 21.86  | 6.64 |

|        |                                                                                                            |       |   |    |    |    |      |      |      |      |      |      |      |      |      |      |      |      |      |        |       |
|--------|------------------------------------------------------------------------------------------------------------|-------|---|----|----|----|------|------|------|------|------|------|------|------|------|------|------|------|------|--------|-------|
| E9QKA4 | Serine/arginine repetitive matrix protein 1 OS=Mus musculus GN=Srrm1 PE=2 SV=1 - [E9QKA4_MOUSE]            | 9.14  | 8 | 4  | 8  | 14 | 0.94 | 1.07 | 1.05 | 0.94 | 0.98 | 0.97 | 1.01 | 1.08 | 1.02 | 0.99 | 1.03 | 0.88 | 0.93 | 101.10 | 11.94 |
| Q2TA57 | Aspartate beta-hydroxylase domain-containing protein 1 OS=Mus musculus GN=Asphd1 PE=2 SV=2 - [ASPH1_MOUSE] | 10.00 | 1 | 2  | 2  | 2  | 1.06 | 1.07 | 1.00 | 1.28 | 1.20 | 0.91 | 0.85 | 1.09 | 0.96 | 0.95 | 0.90 | 0.93 | 0.88 | 38.24  | 8.25  |
| Q9JKC7 | AP-4 complex subunit mu-1 OS=Mus musculus GN=Ap4m1 PE=2 SV=1 - [AP4M1_MOUSE]                               | 3.34  | 1 | 1  | 1  | 1  | 0.54 | 1.32 | 2.45 | 0.98 | 1.83 | 0.92 | 1.70 | 1.09 | 2.01 | 1.06 | 1.97 | 0.95 | 1.78 | 49.48  | 6.64  |
| P97742 | Carnitine O-palmitoyltransferase 1, liver isoform OS=Mus musculus GN=Cpt1a PE=1 SV=4 - [CPT1A_MOUSE]       | 3.88  | 1 | 2  | 2  | 3  | 1.36 | 1.39 | 1.02 | 1.38 | 1.01 | 1.05 | 0.77 | 1.09 | 0.80 | 1.21 | 0.89 | 1.48 | 1.09 | 88.19  | 8.62  |
| Q3UKC1 | Tax1-binding protein 1 homolog OS=Mus musculus GN=Tax1bp1 PE=1 SV=2 - [TAXB1_MOUSE]                        | 11.43 | 3 | 8  | 8  | 11 | 0.99 | 0.97 | 1.03 | 1.01 | 1.06 | 0.94 | 1.00 | 1.09 | 1.03 | 1.04 | 1.11 | 0.90 | 1.04 | 93.57  | 5.33  |
| A2AMY5 | Ubiquitin-associated protein 2 OS=Mus musculus GN=Ubap2 PE=2 SV=1 - [A2AMY5_MOUSE]                         | 13.26 | 3 | 10 | 10 | 19 | 1.01 | 0.85 | 0.79 | 0.96 | 0.89 | 1.11 | 1.06 | 1.09 | 1.12 | 1.03 | 1.02 | 0.93 | 0.87 | 117.76 | 7.72  |
| Q921H8 | 3-ketoacyl-CoA thiolase A, peroxisomal OS=Mus musculus GN=Acaa1a PE=2 SV=1 - [THIKA_MOUSE]                 | 49.06 | 7 | 13 | 13 | 29 | 0.92 | 0.91 | 0.96 | 0.99 | 1.04 | 1.05 | 1.09 | 1.09 | 1.14 | 1.05 | 1.18 | 1.05 | 1.18 | 43.93  | 8.44  |
| E9QKY7 | Transcription factor 20 OS=Mus musculus GN=Tcf20 PE=2 SV=1 - [E9QKY7_MOUSE]                                | 8.75  | 4 | 13 | 14 | 24 | 1.03 | 0.97 | 0.91 | 1.06 | 1.00 | 1.10 | 1.10 | 1.09 | 1.06 | 1.08 | 1.07 | 1.15 | 1.10 | 213.43 | 9.03  |
| Q3UGF1 | Isoform 3 of WD repeat containing protein 19 OS=Mus musculus GN=Wdr19 - [WDR19_MOUSE]                      | 0.69  | 3 | 1  | 1  | 1  | 1.00 | 0.83 | 0.83 | 0.93 | 0.93 | 1.18 | 1.17 | 1.09 | 1.08 | 0.96 | 0.96 | 1.10 | 1.10 | 115.07 | 6.29  |
| Q9E177 | Junctophilin-3 OS=Mus musculus GN=Jph3 PE=1 SV=1 - [JPH3_MOUSE]                                            | 11.02 | 1 | 6  | 6  | 12 | 0.98 | 1.03 | 1.09 | 0.94 | 0.96 | 1.08 | 1.11 | 1.09 | 1.08 | 0.97 | 1.01 | 0.97 | 1.00 | 81.18  | 9.22  |
| E9Q9B7 | Protein Kidins220 OS=Mus musculus GN=Kidins220 PE=2 SV=1 - [E9Q9B7_MOUSE]                                  | 7.14  | 1 | 10 | 10 | 14 | 1.04 | 1.14 | 1.06 | 1.07 | 1.03 | 0.97 | 0.96 | 1.09 | 0.99 | 1.11 | 1.06 | 1.06 | 1.01 | 199.06 | 6.67  |
| O54998 | Peptidyl-prolyl cis-trans isomerase FKBP7 OS=Mus musculus GN=Fkbp7 PE=1 SV=1 - [FKBP7_MOUSE]               | 11.01 | 2 | 3  | 3  | 3  | 1.13 | 0.84 | 0.81 | 0.91 | 0.84 | 1.16 | 1.02 | 1.09 | 0.85 | 1.00 | 0.77 | 0.73 | 0.64 | 24.90  | 6.04  |

|          |                                                                                                                             |       |   |    |    |     |      |      |      |      |      |      |      |      |      |      |      |      |      |        |      |
|----------|-----------------------------------------------------------------------------------------------------------------------------|-------|---|----|----|-----|------|------|------|------|------|------|------|------|------|------|------|------|------|--------|------|
| Q8VDN4   | Coiled-coil domain-containing protein 92<br>OS=Mus musculus<br>GN=Ccd92 PE=1<br>SV=1 -<br>[CCD92_MOUSE]                     | 42.36 | 3 | 13 | 13 | 32  | 1.00 | 0.91 | 0.94 | 0.90 | 0.92 | 1.10 | 1.04 | 1.09 | 1.16 | 1.04 | 1.06 | 0.93 | 0.93 | 35.19  | 9.38 |
| F6XC25   | Coiled-coil and C2 domain-containing protein 1B (Fragment)<br>OS=Mus musculus<br>GN=Cc2d1b PE=4<br>SV=1 -<br>[F6XC25_MOUSE] | 11.95 | 2 | 6  | 6  | 8   | 0.97 | 1.02 | 1.07 | 0.95 | 0.94 | 0.94 | 0.92 | 1.09 | 1.08 | 1.01 | 1.05 | 1.13 | 1.03 | 84.96  | 5.87 |
| O54786-2 | Isoform ICAD-S of DNA fragmentation factor subunit alpha<br>OS=Mus musculus<br>GN=Dffa -<br>[DFFA_MOUSE]                    | 30.94 | 1 | 1  | 6  | 17  | 0.85 | 1.10 | 1.29 | 0.83 | 0.97 | 1.09 | 1.28 | 1.09 | 1.27 | 0.92 | 1.09 | 0.62 | 0.74 | 29.16  | 4.59 |
| Q3TYF1   | NGFI-A-binding protein 2 OS=Mus musculus<br>GN=Nab2 PE=2 SV=1 -<br>[Q3TYF1_MOUSE]                                           | 1.95  | 2 | 1  | 1  | 1   | 1.11 | 1.17 | 1.06 | 1.00 | 0.90 | 1.01 | 0.91 | 1.09 | 0.98 | 0.99 | 0.89 | 1.04 | 0.94 | 49.70  | 6.28 |
| P02469   | Laminin subunit beta-1<br>OS=Mus musculus<br>GN=Lamb1 PE=1<br>SV=3 -<br>[LAMB1_MOUSE]                                       | 1.18  | 2 | 2  | 2  | 3   | 0.94 | 0.87 | 0.93 | 0.92 | 0.98 | 1.09 | 1.15 | 1.09 | 1.15 | 1.14 | 1.21 | 0.99 | 1.05 | 196.96 | 4.94 |
| A2AV92   | PHD finger protein 20 (Fragment)<br>OS=Mus musculus<br>GN=Phf20 PE=2 SV=1 -<br>[A2AV92_MOUSE]                               | 9.73  | 3 | 1  | 1  | 1   | 1.04 | 1.91 | 1.83 | 0.98 | 0.94 | 1.23 | 1.18 | 1.09 | 1.04 | 0.96 | 0.92 | 1.02 | 0.98 | 13.66  | 6.68 |
| Q8BGY2   | Eukaryotic translation initiation factor 5A-2<br>OS=Mus musculus<br>GN=Elf5a2 PE=2<br>SV=3 -<br>[IF5A2_MOUSE]               | 37.91 | 1 | 8  | 8  | 57  | 1.00 | 0.79 | 0.79 | 0.90 | 0.88 | 1.13 | 1.03 | 1.09 | 1.08 | 0.97 | 0.98 | 0.89 | 0.87 | 16.78  | 5.58 |
| P99029-2 | Isoform Cytoplasmic+peroxisomal of Peroxiredoxin-5, mitochondrial<br>OS=Mus musculus<br>GN=Prdx5 -<br>[PRDX5_MOUSE]         | 74.69 | 4 | 13 | 13 | 117 | 0.90 | 0.81 | 0.91 | 0.95 | 1.04 | 1.04 | 1.19 | 1.09 | 1.22 | 1.00 | 1.10 | 0.98 | 1.11 | 17.00  | 7.87 |
| Q00PI9   | Heterogeneous nuclear ribonucleoprotein U-like protein 2<br>OS=Mus musculus<br>GN=Hnrnpul2 PE=1<br>SV=2 -<br>[HNRL2_MOUSE]  | 30.20 | 1 | 18 | 18 | 61  | 0.95 | 0.84 | 1.05 | 0.97 | 1.03 | 1.07 | 1.10 | 1.09 | 1.14 | 0.99 | 1.08 | 1.06 | 1.13 | 84.89  | 4.89 |
| E9PYH0   | Versican core protein<br>OS=Mus musculus<br>GN=Vcan PE=2 SV=1<br>[E9PYH0_MOUSE]                                             | 9.45  | 6 | 4  | 25 | 317 | 1.13 | 0.91 | 0.74 | 0.88 | 0.78 | 1.16 | 0.95 | 1.09 | 0.84 | 0.94 | 0.79 | 0.97 | 0.87 | 366.67 | 4.63 |
| P56375   | Acylphosphatase-2<br>OS=Mus musculus<br>GN=Acyp2 PE=2<br>SV=2 -<br>[ACYP2_MOUSE]                                            | 43.40 | 1 | 4  | 4  | 18  | 1.09 | 0.86 | 0.81 | 0.91 | 0.87 | 1.13 | 0.97 | 1.09 | 0.94 | 0.97 | 0.83 | 1.00 | 0.89 | 11.87  | 9.26 |

|        |                                                                                                                           |       |   |    |    |     |      |      |      |      |      |      |      |      |      |      |      |      |      |        |       |
|--------|---------------------------------------------------------------------------------------------------------------------------|-------|---|----|----|-----|------|------|------|------|------|------|------|------|------|------|------|------|------|--------|-------|
| E9Q132 | 60S ribosomal protein L24 OS=Mus musculus GN=Rpl24 PE=2 SV=1 - [E9Q132_MOUSE]                                             | 21.05 | 3 | 4  | 4  | 9   | 1.04 | 1.06 | 1.08 | 1.02 | 1.01 | 0.94 | 0.96 | 1.09 | 1.08 | 0.98 | 1.00 | 1.06 | 1.08 | 15.34  | 10.87 |
| Q8R3D1 | TBC1 domain family member 13 OS=Mus musculus GN=Tbc1d13 PE=2 SV=1 - [TBC13_MOUSE]                                         | 4.25  | 1 | 1  | 1  | 2   | 1.23 | 0.89 | 0.72 | 1.01 | 0.82 | 1.12 | 0.91 | 1.09 | 0.88 | 0.97 | 0.79 | 0.96 | 0.78 | 46.42  | 5.36  |
| Q8K382 | DENN domain-containing protein 1A OS=Mus musculus GN=Dennd1a PE=1 SV=2 - [DEN1A_MOUSE]                                    | 10.93 | 2 | 6  | 6  | 13  | 1.06 | 1.31 | 1.23 | 1.02 | 1.03 | 1.05 | 0.92 | 1.09 | 1.07 | 1.03 | 0.97 | 1.02 | 0.94 | 111.47 | 6.79  |
| F7CC56 | RB1-inducible coiled-coil protein 1 (Fragment) OS=Mus musculus GN=Rb1cc1 PE=4 SV=1 - [F7CC56_MOUSE]                       | 2.25  | 4 | 4  | 4  | 5   | 0.96 | 1.02 | 1.11 | 0.97 | 1.07 | 1.00 | 1.08 | 1.09 | 1.05 | 1.05 | 1.04 | 1.00 | 1.07 | 168.86 | 5.52  |
| Q9DB15 | 39S ribosomal protein L12, mitochondrial OS=Mus musculus GN=Mrpl12 PE=1 SV=2 - [RM12_MOUSE]                               | 54.23 | 1 | 8  | 8  | 49  | 1.01 | 0.89 | 0.88 | 0.94 | 0.94 | 1.09 | 1.15 | 1.09 | 1.08 | 0.99 | 0.98 | 0.95 | 0.95 | 21.69  | 9.29  |
| Q4VAA2 | Protein CDV3 OS=Mus musculus GN=Cdv3 PE=1 SV=2 - [CDV3_MOUSE]                                                             | 74.02 | 3 | 20 | 20 | 171 | 1.08 | 0.88 | 0.78 | 0.96 | 0.89 | 1.12 | 1.04 | 1.09 | 1.02 | 1.02 | 0.94 | 0.95 | 0.88 | 29.71  | 6.10  |
| Q8BIF9 | Zinc finger protein 787 OS=Mus musculus GN=Zn787 PE=2 SV=3 - [ZN787_MOUSE]                                                | 3.94  | 1 | 1  | 1  | 1   | 1.12 | 2.40 | 2.13 | 1.31 | 1.17 | 1.31 | 1.17 | 1.09 | 0.97 | 1.19 | 1.06 | 1.50 | 1.34 | 40.45  | 8.24  |
| D3Z1N9 | MCG9889 OS=Mus musculus GN=Gm10709 PE=4 SV=1 - [D3Z1N9_MOUSE]                                                             | 24.38 | 6 | 4  | 4  | 8   | 1.10 | 0.85 | 0.76 | 1.06 | 0.97 | 1.15 | 1.07 | 1.09 | 1.00 | 1.15 | 1.07 | 0.90 | 0.82 | 17.64  | 11.84 |
| A2AJ20 | Neural proliferation differentiation and control protein 1 (Fragment) OS=Mus musculus GN=Npdc1 PE=2 SV=1 - [A2AJ20_MOUSE] | 13.42 | 4 | 2  | 2  | 4   | 1.33 | 0.96 | 0.72 | 1.07 | 0.81 | 1.09 | 0.81 | 1.09 | 0.81 | 1.07 | 0.80 | 1.15 | 0.86 | 24.53  | 8.73  |
| Q91V76 | Ester hydrolase C11orf54 homolog OS=Mus musculus PE=2 SV=1 - [CK054_MOUSE]                                                | 20.95 | 1 | 6  | 6  | 10  | 0.90 | 0.73 | 0.83 | 1.00 | 1.09 | 1.09 | 1.18 | 1.09 | 1.16 | 1.11 | 1.22 | 1.07 | 1.09 | 34.97  | 6.29  |
| Q9CXF4 | TBC1 domain family member 15 OS=Mus musculus GN=Tbc1d15 PE=1 SV=1 - [TBC15_MOUSE]                                         | 2.24  | 1 | 1  | 1  | 2   | 0.86 | 1.24 | 1.44 | 1.10 | 1.28 | 0.95 | 1.10 | 1.09 | 1.26 | 1.13 | 1.32 | 1.09 | 1.28 | 76.48  | 5.30  |
| A2AJ95 | NMDA receptor synaptonuclear-signaling and neuronal migration factor OS=Mus musculus GN=Nsmf PE=2 SV=1 - [A2AJ95_MOUSE]   | 10.02 | 9 | 3  | 3  | 8   | 0.88 | 1.01 | 1.16 | 1.01 | 1.15 | 0.95 | 1.25 | 1.09 | 1.20 | 1.02 | 1.16 | 1.05 | 1.27 | 53.92  | 8.51  |



|          |                                                                                                              |       |   |    |    |     |      |      |      |      |      |      |      |      |      |      |      |      |      |        |      |
|----------|--------------------------------------------------------------------------------------------------------------|-------|---|----|----|-----|------|------|------|------|------|------|------|------|------|------|------|------|------|--------|------|
| D3Z1M4   | Calcium-binding protein 1 OS=Mus musculus GN=Cabp1 PE=2 SV=1 - [D3Z1M4_MOUSE]                                | 35.14 | 4 | 11 | 11 | 35  | 0.93 | 1.02 | 1.05 | 0.85 | 0.93 | 1.10 | 1.27 | 1.09 | 1.21 | 0.88 | 0.97 | 0.86 | 0.90 | 37.89  | 8.28 |
| A2AUK5   | Band 4.1-like protein 1 OS=Mus musculus GN=Epb4.111 PE=4 SV=1 - [A2AUK5_MOUSE]                               | 45.73 | 7 | 18 | 34 | 242 | 1.05 | 0.89 | 0.84 | 0.97 | 0.89 | 1.09 | 1.03 | 1.09 | 0.99 | 1.08 | 0.97 | 0.99 | 0.93 | 98.25  | 5.66 |
| A2A543   | Voltage-dependent L-type calcium channel subunit beta-1 OS=Mus musculus GN=Cacnb1 PE=2 SV=1 - [A2A543_MOUSE] | 25.80 | 7 | 6  | 10 | 26  | 1.04 | 1.09 | 1.10 | 1.06 | 1.00 | 1.10 | 1.12 | 1.09 | 0.99 | 1.15 | 1.14 | 1.10 | 1.13 | 65.44  | 6.62 |
| A2AWI7   | Endophilin-B2 OS=Mus musculus GN=Sh3glb2 PE=2 SV=1 - [A2AWI7_MOUSE]                                          | 43.56 | 3 | 2  | 14 | 66  | 0.84 | 1.13 | 1.15 | 0.88 | 1.02 | 1.05 | 1.29 | 1.09 | 1.32 | 1.05 | 1.19 | 1.01 | 1.12 | 44.88  | 5.58 |
| Q9Z131-3 | Isoform 3 of SH3 domain-binding protein 5 OS=Mus musculus GN=Sh3bp5 - [3BP5_MOUSE]                           | 8.33  | 3 | 3  | 3  | 5   | 0.93 | 0.98 | 1.22 | 0.91 | 0.99 | 1.02 | 1.09 | 1.09 | 1.34 | 0.99 | 1.16 | 1.20 | 1.46 | 49.90  | 7.83 |
| Q9D4C5   | ELL-associated factor 1 OS=Mus musculus GN=Eaf1 PE=1 SV=2 - [EAF1_MOUSE]                                     | 8.96  | 1 | 1  | 1  | 3   | 0.99 | 0.67 | 0.68 | 0.75 | 0.76 | 1.12 | 1.13 | 1.09 | 1.10 | 1.01 | 1.02 | 1.18 | 1.20 | 28.95  | 5.40 |
| P15208   | Insulin receptor OS=Mus musculus GN=Insr PE=1 SV=2 - [INSR_MOUSE]                                            | 2.55  | 1 | 2  | 3  | 6   | 1.10 | 1.05 | 0.96 | 1.09 | 0.99 | 1.05 | 0.96 | 1.09 | 0.99 | 1.07 | 0.98 | 1.08 | 0.99 | 155.51 | 5.95 |
| Q7TQH0   | Ataxin-2-like protein OS=Mus musculus GN=Atxn2l PE=1 SV=1 - [ATX2L_MOUSE]                                    | 30.22 | 3 | 1  | 22 | 73  | 1.12 | 1.19 | 1.06 | 1.06 | 0.95 | 1.11 | 0.99 | 1.09 | 0.97 | 1.15 | 1.03 | 1.20 | 1.07 | 110.58 | 8.85 |
| Q9EP53-4 | Isoform 4 of Hamartin OS=Mus musculus GN=Tsc1 - [TSC1_MOUSE]                                                 | 5.92  | 4 | 4  | 4  | 7   | 0.96 | 1.06 | 1.14 | 1.00 | 1.10 | 0.93 | 0.95 | 1.09 | 1.11 | 1.07 | 1.07 | 1.09 | 1.18 | 127.30 | 6.40 |
| E9Q0T8   | Protein Dnah7a OS=Mus musculus GN=Dnah7a PE=4 SV=2 - [E9Q0T8_MOUSE]                                          | 0.30  | 2 | 1  | 1  | 1   | 0.81 | 1.08 | 1.33 | 0.79 | 0.98 | 1.24 | 1.53 | 1.09 | 1.34 | 1.15 | 1.42 | 0.85 | 1.05 | 460.61 | 6.20 |
| Q61166   | Microtubule-associated protein RP/EB family member 1 OS=Mus musculus GN=Mapre1 PE=1 SV=3 - [MARE1_MOUSE]     | 42.91 | 1 | 6  | 9  | 31  | 0.96 | 0.82 | 0.79 | 0.96 | 0.95 | 1.14 | 1.18 | 1.09 | 1.14 | 1.04 | 1.11 | 0.98 | 1.05 | 30.00  | 5.22 |
| Q8R205   | Zinc finger CCCH domain-containing protein 10 OS=Mus musculus GN=Zc3h10 PE=2 SV=1 - [ZC3HA_MOUSE]            | 2.30  | 1 | 1  | 1  | 2   | 1.08 | 0.93 | 0.86 | 0.83 | 0.76 | 1.19 | 1.09 | 1.09 | 1.00 | 1.13 | 1.05 | 1.03 | 0.95 | 46.09  | 7.62 |
| Q9QY42-  | Isoform 2 of Probable G-protein coupled receptor 37 OS=Mus musculus GN=Gpr37 - [GPR37_MOUSE]                 | 3.72  | 3 | 1  | 1  | 2   | 1.13 | 1.61 | 1.41 | 1.15 | 1.01 | 0.98 | 0.86 | 1.09 | 0.96 | 1.02 | 0.90 | 1.05 | 0.93 | 39.25  | 6.19 |

|        |                                                                                                                     |       |   |     |     |     |      |      |      |      |      |      |      |      |      |      |      |      |      |        |       |
|--------|---------------------------------------------------------------------------------------------------------------------|-------|---|-----|-----|-----|------|------|------|------|------|------|------|------|------|------|------|------|------|--------|-------|
| Q9CQ01 | Ribonuclease T2<br>OS=Mus musculus<br>GN=Rnaset2 PE=2<br>SV=1 -<br>[RNT2_MOUSE]                                     | 2.70  | 1 | 1   | 1   | 2   | 1.04 | 0.76 | 0.73 | 0.92 | 0.88 | 1.01 | 0.96 | 1.09 | 1.04 | 1.07 | 1.03 | 1.12 | 1.07 | 29.59  | 6.37  |
| F6VQZ6 | Protein shisa-6<br>homolog (Fragment)<br>OS=Mus musculus<br>GN=Shisa6 PE=4<br>SV=1 -<br>[F6VQZ6_MOUSE]              | 16.57 | 2 | 7   | 7   | 15  | 1.03 | 1.17 | 0.98 | 0.97 | 0.93 | 1.11 | 1.02 | 1.09 | 1.09 | 1.07 | 1.00 | 1.20 | 1.00 | 56.20  | 9.19  |
| Q7TPD0 | Isoform 2 of Integrator<br>complex subunit 3<br>OS=Mus musculus<br>GN=Ints3 -<br>[INT3_MOUSE]                       | 18.79 | 2 | 3   | 3   | 4   | 0.99 | 1.03 | 0.93 | 0.94 | 0.96 | 1.11 | 1.11 | 1.09 | 1.04 | 1.13 | 1.11 | 0.99 | 1.08 | 36.63  | 8.51  |
| Q8BJF9 | Charged multivesicular<br>body protein 2b<br>OS=Mus musculus<br>GN=Chmp2b PE=2<br>SV=1 -<br>[CHM2B_MOUSE]           | 20.66 | 1 | 4   | 5   | 12  | 1.07 | 0.87 | 0.84 | 0.98 | 0.89 | 1.09 | 0.98 | 1.09 | 1.06 | 0.94 | 0.94 | 0.94 | 0.87 | 23.92  | 8.78  |
| A2AR02 | Peptidyl-prolyl cis-<br>trans isomerase G<br>OS=Mus musculus<br>GN=Ppig PE=1 SV=1 -<br>[PPIG_MOUSE]                 | 4.79  | 2 | 3   | 3   | 9   | 1.00 | 0.96 | 0.88 | 0.96 | 1.00 | 0.94 | 1.00 | 1.09 | 1.16 | 0.97 | 1.01 | 1.10 | 1.03 | 88.27  | 10.27 |
| Q3U9F6 | RING finger protein<br>166 OS=Mus musculus<br>GN=Rn166 PE=2<br>SV=1 -<br>[RN166_MOUSE]                              | 7.59  | 1 | 1   | 1   | 3   | 0.99 | 1.00 | 1.01 | 0.99 | 1.00 | 0.98 | 0.98 | 1.09 | 1.10 | 1.06 | 1.07 | 0.94 | 0.95 | 26.05  | 8.06  |
| E9Q616 | Protein Ahnak<br>OS=Mus musculus<br>GN=Ahnak PE=2<br>SV=1 -<br>[E9Q616_MOUSE]                                       | 58.29 | 2 | 156 | 158 | 412 | 1.02 | 0.80 | 0.77 | 0.89 | 0.88 | 1.04 | 1.01 | 1.09 | 1.09 | 1.06 | 1.03 | 0.85 | 0.82 | 603.87 | 6.30  |
| P58686 | UPF0184 protein<br>C9orf16 homolog<br>OS=Mus musculus<br>PE=2 SV=1 -<br>[CI016_MOUSE]                               | 10.84 | 1 | 1   | 1   | 2   | 0.83 | 1.01 | 1.21 | 0.92 | 1.11 | 0.87 | 1.04 | 1.09 | 1.31 | 0.94 | 1.13 | 1.04 | 1.25 | 9.05   | 4.26  |
| Q3TQ17 | Uncharacterized<br>protein C9orf78<br>homolog OS=Mus<br>musculus PE=1 SV=2 -<br>[CI078_MOUSE]                       | 32.87 | 1 | 9   | 9   | 28  | 0.97 | 0.83 | 0.84 | 0.91 | 0.94 | 1.09 | 1.09 | 1.09 | 1.10 | 0.92 | 1.01 | 0.96 | 0.95 | 33.52  | 6.34  |
| Q9CYG7 | Isoform 2 of<br>Mitochondrial import<br>receptor subunit<br>TOM34 OS=Mus<br>musculus<br>GN=Tom34 -<br>[TOM34_MOUSE] | 32.36 | 1 | 1   | 7   | 21  | 1.04 | 0.97 | 0.93 | 0.98 | 0.95 | 1.10 | 1.05 | 1.09 | 1.05 | 0.96 | 0.93 | 0.99 | 0.96 | 34.26  | 9.07  |
| P62869 | Transcription<br>elongation factor B<br>polypeptide 2 OS=Mus<br>musculus GN=Tceb2<br>PE=1 SV=1 -<br>[ELOB_MOUSE]    | 84.75 | 1 | 8   | 8   | 27  | 1.01 | 0.91 | 0.86 | 0.96 | 0.95 | 1.05 | 1.10 | 1.09 | 1.04 | 0.99 | 0.93 | 1.00 | 1.04 | 13.16  | 5.01  |
| E9Q6U4 | Protein Pfdn4 OS=Mus<br>musculus GN=Pfdn4<br>PE=2 SV=1 -<br>[E9Q6U4_MOUSE]                                          | 40.00 | 5 | 6   | 6   | 34  | 1.01 | 0.82 | 0.82 | 0.89 | 0.85 | 1.12 | 1.09 | 1.09 | 1.05 | 1.00 | 0.97 | 1.00 | 0.90 | 14.72  | 4.50  |
| Q9DA03 | Complex III assembly<br>factor LYRM7<br>OS=Mus musculus<br>GN=Lyrm7 PE=2<br>SV=2 -<br>[LYRM7_MOUSE]                 | 25.96 | 1 | 2   | 2   | 3   | 0.94 | 0.78 | 0.83 | 0.86 | 0.92 | 0.95 | 1.01 | 1.09 | 1.16 | 0.97 | 1.04 | 0.89 | 0.95 | 12.04  | 9.45  |

|          |                                                                                                                    |       |   |    |    |    |      |      |      |      |      |      |      |      |      |      |      |      |      |        |       |
|----------|--------------------------------------------------------------------------------------------------------------------|-------|---|----|----|----|------|------|------|------|------|------|------|------|------|------|------|------|------|--------|-------|
| B1AVF2   | TSC22 domain family protein 3 OS=Mus musculus GN=Tsc22d3 PE=2 SV=1 - [B1AVF2_MOUSE]                                | 45.13 | 4 | 2  | 4  | 21 | 1.02 | 0.81 | 0.77 | 0.86 | 0.86 | 1.08 | 1.06 | 1.09 | 1.09 | 0.95 | 0.96 | 0.91 | 0.92 | 12.55  | 4.68  |
| Q7TME0   | Lipid phosphate phosphatase-related protein type 4 OS=Mus musculus GN=Lppr4 PE=1 SV=2 - [LPPR4_MOUSE]              | 27.15 | 1 | 16 | 16 | 70 | 1.02 | 1.14 | 1.12 | 1.03 | 1.03 | 1.11 | 1.08 | 1.09 | 1.09 | 1.05 | 1.04 | 1.06 | 1.05 | 83.24  | 8.84  |
| Q8K2F8   | Protein LSM14 homolog A OS=Mus musculus GN=Lsm14a PE=1 SV=1 - [LS14A_MOUSE]                                        | 20.56 | 3 | 10 | 10 | 16 | 1.09 | 0.95 | 1.04 | 0.98 | 0.92 | 1.00 | 0.97 | 1.09 | 1.05 | 1.03 | 0.95 | 0.90 | 0.98 | 50.52  | 9.52  |
| Q61016   | Guanine nucleotide-binding protein G(I)/G(S)/G(O) subunit gamma-7 OS=Mus musculus GN=Gng7 PE=2 SV=2 - [GBG7_MOUSE] | 57.35 | 3 | 3  | 3  | 28 | 0.98 | 1.10 | 1.13 | 0.94 | 0.98 | 1.15 | 1.14 | 1.09 | 1.14 | 1.25 | 1.26 | 1.41 | 1.41 | 7.47   | 8.51  |
| P61089   | Ubiquitin-conjugating enzyme E2 N OS=Mus musculus GN=Ube2n PE=1 SV=1 - [UBE2N_MOUSE]                               | 55.26 | 2 | 8  | 8  | 33 | 0.94 | 0.71 | 0.77 | 0.95 | 1.00 | 0.94 | 1.02 | 1.09 | 1.06 | 1.00 | 0.99 | 0.88 | 0.90 | 17.13  | 6.57  |
| Q6GV12   | 3-ketodihydroshingosine reductase OS=Mus musculus GN=Kdsr PE=2 SV=1 - [KDSR_MOUSE]                                 | 4.22  | 1 | 1  | 1  | 2  | 0.95 | 1.35 | 1.41 | 1.02 | 1.07 | 1.01 | 1.05 | 1.09 | 1.14 | 0.91 | 0.96 | 1.08 | 1.14 | 35.93  | 7.90  |
| Q8BH27   | Multiple epidermal growth factor-like domains protein 9 OS=Mus musculus GN=Megf9 PE=2 SV=1 - [MEGF9_MOUSE]         | 8.17  | 1 | 5  | 5  | 13 | 1.09 | 0.94 | 0.85 | 1.15 | 1.07 | 1.24 | 1.09 | 1.09 | 1.01 | 1.09 | 0.97 | 1.04 | 0.89 | 62.79  | 5.47  |
| F6ZQA3   | Protein Numa1 (Fragment) OS=Mus musculus GN=Numa1 PE=2 SV=1 - [F6ZQA3_MOUSE]                                       | 31.85 | 1 | 1  | 15 | 31 | 0.84 | 1.00 | 1.18 | 0.93 | 1.10 | 0.97 | 1.14 | 1.09 | 1.29 | 0.99 | 1.17 | 1.08 | 1.29 | 82.83  | 9.44  |
| O35075   | Down syndrome critical region protein 3 homolog OS=Mus musculus GN=Dscr3 PE=2 SV=1 - [DSCR3_MOUSE]                 | 5.72  | 1 | 1  | 1  | 4  | 1.20 | 1.42 | 1.18 | 1.25 | 1.04 | 1.22 | 1.01 | 1.09 | 0.91 | 1.13 | 0.94 | 1.31 | 1.10 | 32.95  | 7.68  |
| F8W135   | Histone H3 OS=Mus musculus GN=H3f3a PE=2 SV=1 - [F8W135_MOUSE]                                                     | 36.30 | 6 | 1  | 8  | 56 | 1.02 | 0.81 | 0.79 | 1.06 | 1.04 | 1.08 | 1.06 | 1.09 | 1.07 | 1.17 | 1.15 | 1.11 | 1.09 | 15.19  | 11.40 |
| Q9CQX2   | Cytochrome b5 type B OS=Mus musculus GN=Cyb5b PE=1 SV=1 - [CYB5B_MOUSE]                                            | 41.10 | 1 | 4  | 4  | 42 | 1.06 | 1.10 | 1.06 | 1.03 | 0.88 | 1.13 | 1.07 | 1.09 | 1.06 | 0.93 | 0.95 | 1.03 | 1.04 | 16.31  | 4.89  |
| P05555-2 | Isoform 2 of Integrin alpha-M OS=Mus musculus GN=Itgam - [ITAM_MOUSE]                                              | 2.80  | 7 | 2  | 2  | 3  | 1.08 | 1.25 | 1.16 | 0.95 | 0.89 | 0.92 | 0.85 | 1.09 | 1.01 | 1.40 | 1.30 | 1.22 | 1.14 | 115.12 | 7.64  |

|          |                                                                                                                 |       |   |    |    |    |      |      |      |      |      |      |      |      |      |      |      |      |      |        |      |
|----------|-----------------------------------------------------------------------------------------------------------------|-------|---|----|----|----|------|------|------|------|------|------|------|------|------|------|------|------|------|--------|------|
| O35607   | Bone morphogenetic protein receptor type-2<br>OS=Mus musculus<br>GN=Bmpr2 PE=2<br>SV=1 -<br>[BMPR2_MOUSE]       | 16.09 | 1 | 12 | 12 | 27 | 1.10 | 1.16 | 1.09 | 1.03 | 0.99 | 1.01 | 1.04 | 1.09 | 1.02 | 1.05 | 1.04 | 1.05 | 0.99 | 114.95 | 6.23 |
| Q9CQZ1   | Heat shock factor-binding protein 1<br>OS=Mus musculus<br>GN=Hsbp1 PE=2<br>SV=1 -<br>[HSBP1_MOUSE]              | 72.37 | 1 | 5  | 5  | 26 | 1.00 | 0.60 | 0.59 | 0.90 | 1.02 | 1.07 | 1.06 | 1.09 | 1.08 | 1.05 | 1.10 | 0.83 | 0.93 | 8.61   | 4.31 |
| Q9DB29   | Isoamyl acetate-hydrolyzing esterase 1 homolog<br>OS=Mus musculus<br>GN=lah1 PE=2<br>SV=1 -<br>[LAH1_MOUSE]     | 16.47 | 1 | 3  | 3  | 12 | 0.92 | 1.05 | 1.11 | 1.02 | 1.15 | 1.00 | 1.17 | 1.09 | 1.28 | 1.02 | 1.19 | 1.19 | 1.39 | 27.96  | 5.52 |
| Q6PCZ4   | Melanoma-associated antigen E1<br>OS=Mus musculus<br>GN=Magee1 PE=1<br>SV=1 -<br>[MAGE1_MOUSE]                  | 4.79  | 1 | 3  | 3  | 10 | 1.13 | 1.15 | 0.91 | 1.00 | 0.88 | 1.04 | 0.97 | 1.09 | 1.06 | 1.10 | 0.98 | 1.02 | 1.02 | 101.57 | 6.67 |
| Q9D164-2 | Isoform 2 of FXYD domain-containing ion transport regulator 6<br>OS=Mus musculus<br>GN=Fxyd6 -<br>[FXYD6_MOUSE] | 26.88 | 2 | 2  | 2  | 10 | 1.43 | 0.90 | 0.66 | 0.93 | 0.70 | 1.31 | 0.91 | 1.09 | 0.72 | 1.05 | 0.87 | 1.10 | 0.78 | 10.30  | 5.11 |
| Q9JLV1   | BAG family molecular chaperone regulator 3<br>OS=Mus musculus<br>GN=Bag3 PE=1 SV=2<br>[BAG3_MOUSE]              | 26.69 | 1 | 9  | 9  | 24 | 0.96 | 0.82 | 0.80 | 0.88 | 0.94 | 1.10 | 1.23 | 1.09 | 1.16 | 0.94 | 0.98 | 0.91 | 0.88 | 61.82  | 7.27 |
| P51163   | Uroporphyrinogen-III synthase<br>OS=Mus musculus<br>GN=Uros PE=2<br>SV=1 -<br>[HEM4_MOUSE]                      | 23.40 | 2 | 4  | 4  | 7  | 0.90 | 0.87 | 0.96 | 0.82 | 0.93 | 0.91 | 0.97 | 1.09 | 1.21 | 0.92 | 1.02 | 0.92 | 1.02 | 28.49  | 6.54 |
| Q61036   | Serine/threonine-protein kinase PAK 3<br>OS=Mus musculus<br>GN=Pak3 PE=1 SV=2<br>[PAK3_MOUSE]                   | 30.05 | 5 | 5  | 14 | 70 | 1.09 | 0.92 | 0.85 | 0.97 | 0.87 | 1.09 | 1.04 | 1.09 | 1.00 | 1.04 | 0.96 | 1.03 | 0.96 | 62.36  | 5.40 |
| P15116   | Cadherin-2<br>OS=Mus musculus<br>GN=Cdh2 PE=1<br>SV=2 -<br>[CADH2_MOUSE]                                        | 33.33 | 2 | 17 | 18 | 84 | 1.03 | 0.99 | 0.94 | 0.99 | 0.93 | 1.10 | 1.02 | 1.09 | 1.03 | 1.06 | 0.98 | 1.07 | 1.02 | 99.73  | 4.78 |
| P62484   | Abl interactor 2<br>OS=Mus musculus<br>GN=Abi2 PE=1 SV=1<br>[ABI2_MOUSE]                                        | 32.51 | 1 | 7  | 11 | 43 | 0.97 | 0.99 | 0.95 | 0.96 | 1.01 | 1.11 | 1.17 | 1.09 | 1.12 | 1.06 | 1.10 | 0.94 | 0.99 | 49.36  | 6.01 |
| Q9CR98   | Protein FAM136A<br>OS=Mus musculus<br>GN=Fam136a PE=1<br>SV=1 -<br>[F136A_MOUSE]                                | 53.62 | 2 | 7  | 7  | 43 | 1.06 | 0.87 | 0.84 | 0.95 | 0.90 | 1.10 | 1.03 | 1.09 | 1.02 | 1.10 | 1.02 | 1.03 | 0.98 | 15.66  | 7.61 |
| Q9CXW2   | 28S ribosomal protein S22, mitochondrial<br>OS=Mus musculus<br>GN=Mrps22 PE=2<br>SV=1 -<br>[RT22_MOUSE]         | 14.76 | 1 | 4  | 4  | 5  | 0.94 | 1.04 | 0.99 | 0.90 | 0.98 | 0.93 | 0.97 | 1.09 | 0.96 | 0.91 | 1.00 | 1.02 | 0.89 | 41.17  | 8.56 |

|          |                                                                                                    |       |    |    |    |     |      |       |       |      |      |      |      |      |      |      |      |      |      |        |      |
|----------|----------------------------------------------------------------------------------------------------|-------|----|----|----|-----|------|-------|-------|------|------|------|------|------|------|------|------|------|------|--------|------|
| D3YW10   | Ubiquitin-conjugating enzyme E2 E2 (Fragment) OS=Mus musculus GN=Ube2e2 PE=2 SV=1 - [D3YW10_MOUSE] | 23.15 | 10 | 2  | 2  | 6   | 0.93 | 0.92  | 0.96  | 1.04 | 1.12 | 1.01 | 1.09 | 1.09 | 1.12 | 0.95 | 1.00 | 1.06 | 1.14 | 11.63  | 5.07 |
| Q9D6T9   | 28S ribosomal protein S36, mitochondrial OS=Mus musculus GN=Mrps36 PE=4 SV=1 - [Q9D6T9_MOUSE]      | 56.00 | 4  | 6  | 6  | 73  | 0.99 | 0.69  | 0.72  | 0.90 | 0.92 | 1.13 | 1.14 | 1.09 | 1.09 | 0.95 | 1.00 | 0.87 | 0.84 | 10.94  | 9.99 |
| Q78F42   | Protein Zfp324 OS=Mus musculus GN=Zfp324 PE=2 SV=1 - [Q78F42_MOUSE]                                | 5.83  | 1  | 1  | 2  | 2   | 1.07 | 0.89  | 0.83  | 0.97 | 0.91 | 1.07 | 1.00 | 1.09 | 1.02 | 1.01 | 0.95 | 0.88 | 0.83 | 64.32  | 9.55 |
| P47955   | 60S acidic ribosomal protein P1 OS=Mus musculus GN=Rplp1 PE=1 SV=1 - [RLA1_MOUSE]                  | 66.67 | 2  | 3  | 3  | 31  | 0.84 | 0.80  | 0.90  | 0.88 | 0.96 | 1.28 | 1.31 | 1.09 | 1.22 | 0.97 | 1.10 | 1.05 | 1.12 | 11.47  | 4.32 |
| Q8R3V6   | CUE domain-containing protein 1 OS=Mus musculus GN=Cued1 PE=1 SV=2 - [CUED1_MOUSE]                 | 15.46 | 6  | 4  | 4  | 10  | 1.02 | 0.93  | 0.89  | 0.95 | 0.93 | 1.18 | 1.18 | 1.09 | 1.13 | 1.03 | 1.10 | 1.10 | 1.05 | 42.75  | 5.58 |
| Q9CRC6   | UPF0693 protein C10orf32 homolog OS=Mus musculus PE=1 SV=1 - [CJ032_MOUSE]                         | 60.95 | 1  | 4  | 4  | 18  | 1.06 | 0.99  | 0.91  | 0.93 | 0.85 | 1.22 | 1.18 | 1.09 | 1.15 | 1.12 | 1.17 | 1.12 | 1.10 | 11.54  | 6.79 |
| Q9DCX2   | ATP synthase subunit d, mitochondrial OS=Mus musculus GN=Atp5h PE=1 SV=3 - [ATP5H_MOUSE]           | 89.44 | 3  | 17 | 19 | 259 | 0.96 | 0.77  | 0.80  | 0.87 | 0.91 | 1.10 | 1.16 | 1.09 | 1.17 | 0.99 | 1.07 | 0.96 | 1.01 | 18.74  | 5.69 |
| Q8VI59   | Pecanex-like protein 3 OS=Mus musculus GN=Pcnx3 PE=1 SV=2 - [PCX3_MOUSE]                           | 0.94  | 1  | 1  | 1  | 1   | 4.37 | 56.42 | 12.88 | 2.57 | 0.59 | 2.53 | 0.58 | 1.09 | 0.25 | 1.00 | 0.23 | 1.12 | 0.26 | 221.43 | 6.62 |
| Q6ZQW5   | Sorting nexin 12, isoform CRA_c OS=Mus musculus GN=Snx12 PE=2 SV=1 - [Q6ZQW5_MOUSE]                | 61.11 | 4  | 8  | 9  | 31  | 0.94 | 0.96  | 1.07  | 0.98 | 1.04 | 1.04 | 1.07 | 1.09 | 1.18 | 0.99 | 1.08 | 1.04 | 1.13 | 18.87  | 8.44 |
| G3UXB9   | T-cell leukemia homeobox protein 1 OS=Mus musculus GN=Tx1 PE=2 SV=1 - [G3UXB9_MOUSE]               | 10.99 | 4  | 1  | 1  | 1   | 0.35 | 0.78  | 2.22  | 0.81 | 2.31 | 1.07 | 3.03 | 1.09 | 3.10 | 1.28 | 3.65 | 1.93 | 5.50 | 10.47  | 8.00 |
| Q80XP9-2 | Isoform 2 of Serine/threonine-protein kinase WNK3 OS=Mus musculus GN=Wnk3 - [WNK3_MOUSE]           | 6.32  | 5  | 5  | 8  | 14  | 1.13 | 0.84  | 0.84  | 0.95 | 0.93 | 1.05 | 1.02 | 1.09 | 1.08 | 1.07 | 1.01 | 1.02 | 1.04 | 188.31 | 5.62 |
| H3BKL6   | cTAGE family member 5 OS=Mus musculus GN=Ctage5 PE=2 SV=1 - [H3BKL6_MOUSE]                         | 10.27 | 14 | 6  | 6  | 10  | 1.06 | 1.09  | 1.07  | 1.13 | 1.10 | 1.07 | 1.11 | 1.09 | 1.15 | 1.09 | 1.13 | 1.00 | 1.07 | 79.35  | 5.21 |

|          |                                                                                                                             |       |   |    |    |     |      |      |      |      |      |      |      |      |      |      |      |      |      |        |       |      |
|----------|-----------------------------------------------------------------------------------------------------------------------------|-------|---|----|----|-----|------|------|------|------|------|------|------|------|------|------|------|------|------|--------|-------|------|
| Q61581   | Insulin-like growth factor-binding protein 7<br>OS=Mus musculus<br>GN=Igfbp7 PE=2<br>SV=3 -<br>[IBP7_MOUSE]                 | 3.20  | 3 | 1  | 1  | 1   | 1    | 0.83 | 0.57 | 0.69 | 0.79 | 0.95 | 0.67 | 0.80 | 1.09 | 1.31 | 1.04 | 1.25 | 0.89 | 1.07   | 28.95 | 8.31 |
| Q9CRB6   | Tubulin polymerization-promoting protein family member 3<br>OS=Mus musculus<br>GN=Tppp3 PE=1<br>SV=1 -<br>[TPPP3_MOUSE]     | 53.41 | 1 | 12 | 12 | 52  | 1.24 | 0.84 | 0.67 | 0.91 | 0.72 | 1.18 | 0.96 | 1.09 | 0.86 | 1.22 | 0.99 | 1.14 | 0.92 | 18.95  | 9.11  |      |
| Q8VCD6   | Receptor expression-enhancing protein 2<br>OS=Mus musculus<br>GN=Reep2 PE=2<br>SV=2 -<br>[REEP2_MOUSE]                      | 27.17 | 1 | 6  | 6  | 13  | 0.82 | 1.11 | 1.32 | 1.03 | 1.19 | 1.09 | 1.26 | 1.09 | 1.31 | 1.10 | 1.35 | 1.02 | 1.24 | 28.42  | 9.41  |      |
| P09103   | Protein disulfide-isomerase OS=Mus musculus<br>GN=P4hb PE=1 SV=2 -<br>[PDI1_MOUSE]                                          | 69.55 | 3 | 33 | 33 | 288 | 1.00 | 0.81 | 0.78 | 0.90 | 0.90 | 1.10 | 1.09 | 1.09 | 1.07 | 0.99 | 1.01 | 0.94 | 0.94 | 57.02  | 4.88  |      |
| Q8C0Q2   | Zinc fingers and homeobox protein 3<br>OS=Mus musculus<br>GN=Zhx3 PE=2 SV=2<br>[ZHX3_MOUSE]                                 | 7.89  | 1 | 5  | 5  | 10  | 1.01 | 0.99 | 1.03 | 0.95 | 0.93 | 1.11 | 1.09 | 1.09 | 1.09 | 1.03 | 0.99 | 1.03 | 1.07 | 104.28 | 6.57  |      |
| Q9Z2M7   | Phosphomannomutase 2<br>OS=Mus musculus<br>GN=Pmm2 PE=2<br>SV=1 -<br>[PMM2_MOUSE]                                           | 29.75 | 1 | 5  | 6  | 18  | 0.97 | 0.94 | 0.96 | 0.99 | 1.05 | 1.14 | 1.16 | 1.09 | 1.11 | 1.09 | 1.12 | 1.15 | 1.19 | 27.64  | 6.42  |      |
| A2A690   | Protein TANC2<br>OS=Mus musculus<br>GN=Tanc2 PE=1<br>SV=1 -<br>[TANC2_MOUSE]                                                | 10.48 | 4 | 14 | 14 | 38  | 0.96 | 1.17 | 1.21 | 1.01 | 1.07 | 1.09 | 1.09 | 1.09 | 1.12 | 1.11 | 1.14 | 1.10 | 1.14 | 220.13 | 7.97  |      |
| P55284   | Cadherin-5 OS=Mus musculus<br>GN=Cdh5 PE=1 SV=2 -<br>[CADH5_MOUSE]                                                          | 3.19  | 1 | 2  | 2  | 2   | 0.95 | 1.18 | 1.25 | 0.96 | 1.02 | 0.79 | 0.84 | 1.09 | 1.15 | 0.94 | 0.99 | 0.63 | 0.67 | 87.85  | 5.30  |      |
| F6YRW4   | F-box and leucine-rich repeat protein 11<br>OS=Mus musculus<br>GN=Kdm2a PE=4<br>SV=2 -<br>[F6YRW4_MOUSE]                    | 2.84  | 3 | 2  | 2  | 2   | 0.94 | 0.92 | 0.98 | 1.10 | 1.17 | 1.02 | 1.08 | 1.09 | 1.15 | 1.08 | 1.15 | 0.96 | 1.01 | 132.58 | 7.52  |      |
| Q6PCN3   | Tau-tubulin kinase 1<br>OS=Mus musculus<br>GN=Ttk1 PE=2 SV=3<br>- [TTBK1_MOUSE]                                             | 5.73  | 1 | 4  | 4  | 7   | 0.91 | 0.88 | 0.86 | 1.05 | 1.17 | 1.16 | 1.30 | 1.09 | 1.16 | 1.02 | 1.19 | 1.10 | 1.14 | 141.53 | 5.62  |      |
| Q6P2K6-2 | Isoform 2 of Serine/threonine-protein phosphatase 4 regulatory subunit 3A<br>OS=Mus musculus<br>GN=Smek1 -<br>[P4R3A_MOUSE] | 4.25  | 3 | 1  | 1  | 1   | 0.95 | 0.80 | 0.83 | 0.90 | 0.95 | 0.92 | 0.96 | 1.09 | 1.15 | 1.01 | 1.07 | 0.92 | 0.97 | 29.16  | 4.87  |      |
| Q6PDX6-  | Isoform 4 of E3 ubiquitin-protein ligase Rnf220<br>OS=Mus musculus<br>GN=Rnf220 -<br>[RN220_MOUSE]                          | 40.00 | 5 | 8  | 8  | 22  | 1.08 | 0.98 | 1.01 | 0.95 | 0.93 | 1.14 | 1.05 | 1.09 | 1.02 | 0.94 | 0.94 | 0.97 | 0.95 | 27.47  | 4.96  |      |

|        |                                                                                                                      |       |   |    |    |     |      |      |      |      |      |      |      |      |      |      |      |      |      |        |       |
|--------|----------------------------------------------------------------------------------------------------------------------|-------|---|----|----|-----|------|------|------|------|------|------|------|------|------|------|------|------|------|--------|-------|
| Q9CPT3 | N-acetylneuraminate-9-phosphatase OS=Mus musculus GN=Nanp PE=1 SV=1 - [NANP_MOUSE]                                   | 7.26  | 1 | 1  | 1  | 2   | 1.22 | 0.99 | 0.81 | 1.27 | 1.04 | 0.98 | 0.80 | 1.09 | 0.90 | 1.02 | 0.84 | 1.18 | 0.97 | 27.79  | 6.07  |
| E9Q6H8 | Protein Plekha5 OS=Mus musculus GN=Plekha5 PE=2 SV=1 - [E9Q6H8_MOUSE]                                                | 7.17  | 1 | 6  | 6  | 15  | 0.98 | 1.02 | 1.06 | 1.09 | 1.13 | 1.02 | 1.08 | 1.09 | 1.13 | 1.01 | 1.11 | 1.07 | 1.16 | 144.26 | 7.39  |
| P62761 | Visinin-like protein 1 OS=Mus musculus GN=Vsnl1 PE=1 SV=2 - [VISL1_MOUSE]                                            | 76.96 | 1 | 13 | 16 | 439 | 1.06 | 0.87 | 0.84 | 0.97 | 0.92 | 1.07 | 1.03 | 1.09 | 1.04 | 0.98 | 0.92 | 1.00 | 0.93 | 22.13  | 5.15  |
| G3UWW1 | Microtubule-associated protein (Fragment) OS=Mus musculus GN=Map2 PE=2 SV=1 - [G3UWW1_MOUSE]                         | 52.08 | 1 | 2  | 20 | 737 | 1.10 | 1.09 | 0.99 | 0.88 | 0.80 | 1.09 | 0.99 | 1.10 | 0.99 | 0.98 | 0.90 | 0.80 | 0.73 | 36.61  | 10.42 |
| Q60989 | E3 ubiquitin-protein ligase XIAP OS=Mus musculus GN=Xiap PE=1 SV=2 - [XIAP_MOUSE]                                    | 12.70 | 2 | 4  | 4  | 8   | 1.00 | 0.76 | 0.75 | 0.88 | 0.87 | 1.03 | 0.99 | 1.10 | 1.00 | 1.00 | 1.03 | 0.93 | 1.01 | 56.04  | 6.23  |
| Q9Z0F8 | Disintegrin and metalloproteinase domain-containing protein 17 OS=Mus musculus GN=Adam17 PE=1 SV=3 - [ADA17_MOUSE]   | 3.02  | 2 | 2  | 2  | 3   | 1.03 | 0.99 | 0.95 | 1.00 | 0.96 | 1.05 | 1.01 | 1.10 | 1.06 | 0.99 | 0.96 | 0.88 | 0.85 | 93.00  | 5.94  |
| P70671 | Interferon regulatory factor 3 OS=Mus musculus GN=Irf3 PE=1 SV=1 - [IRF3_MOUSE]                                      | 3.34  | 1 | 1  | 1  | 2   | 1.25 | 1.78 | 1.42 | 1.26 | 1.01 | 1.11 | 0.89 | 1.10 | 0.88 | 1.23 | 0.99 | 1.49 | 1.20 | 46.82  | 5.43  |
| P15066 | Transcription factor jun-D OS=Mus musculus GN=Jund PE=1 SV=1 - [JUND_MOUSE]                                          | 14.66 | 1 | 3  | 4  | 8   | 0.98 | 0.85 | 0.81 | 0.91 | 0.86 | 1.10 | 1.08 | 1.10 | 1.12 | 1.03 | 0.99 | 1.14 | 1.09 | 34.88  | 7.44  |
| Q9CR50 | RING finger and CHY zinc finger domain-containing protein 1 OS=Mus musculus GN=Rchyl1 PE=1 SV=1 - [ZN363_MOUSE]      | 6.51  | 2 | 2  | 2  | 4   | 1.04 | 0.69 | 0.71 | 0.82 | 0.85 | 1.07 | 1.09 | 1.10 | 1.02 | 0.91 | 0.93 | 0.90 | 0.93 | 29.99  | 7.18  |
| Q9D8S9 | BolA-like protein 1 OS=Mus musculus GN=Bola1 PE=1 SV=1 - [BOLA1_MOUSE]                                               | 48.91 | 1 | 4  | 4  | 22  | 1.02 | 0.93 | 0.89 | 0.93 | 0.90 | 1.13 | 1.13 | 1.10 | 1.13 | 1.02 | 1.01 | 0.93 | 0.91 | 14.37  | 8.76  |
| Q80W00 | Isoform 2 of Serine/threonine-protein phosphatase 1 regulatory subunit 10 OS=Mus musculus GN=Ppp1r10 - [PP1RA_MOUSE] | 13.27 | 2 | 8  | 8  | 11  | 0.99 | 0.92 | 0.90 | 0.93 | 0.90 | 1.11 | 1.10 | 1.10 | 1.10 | 1.05 | 0.99 | 0.95 | 0.96 | 92.99  | 9.16  |

|          |                                                                                                                     |       |    |    |    |     |      |      |      |      |      |      |      |      |      |      |      |      |      |        |      |
|----------|---------------------------------------------------------------------------------------------------------------------|-------|----|----|----|-----|------|------|------|------|------|------|------|------|------|------|------|------|------|--------|------|
| P10637-5 | Isoform Tau-D of Microtubule-associated protein tau OS=Mus musculus GN=Mapt - [TAU_MOUSE]                           | 77.69 | 6  | 1  | 31 | 707 | 1.09 | 1.12 | 1.07 | 0.85 | 0.85 | 1.21 | 1.13 | 1.10 | 1.02 | 0.93 | 0.87 | 1.09 | 1.00 | 38.94  | 9.50 |
| Q9CVD2   | Ataxin-3 OS=Mus musculus GN=Atxn3 PE=1 SV=2 - [ATX3_MOUSE]                                                          | 25.07 | 5  | 7  | 7  | 25  | 0.96 | 0.94 | 1.02 | 0.90 | 0.96 | 1.00 | 1.08 | 1.10 | 1.09 | 1.04 | 1.05 | 1.07 | 1.03 | 40.51  | 4.83 |
| Q60598   | Src substrate cortactin OS=Mus musculus GN=Ctn PE=1 SV=2 - [SRC8_MOUSE]                                             | 43.96 | 2  | 22 | 22 | 224 | 1.02 | 0.83 | 0.84 | 0.93 | 0.92 | 1.13 | 1.08 | 1.10 | 1.09 | 1.02 | 0.99 | 0.94 | 0.93 | 61.21  | 5.40 |
| E9QAD1   | Nuclear receptor-interacting protein 2 (Fragment) OS=Mus musculus GN=Nrip2 PE=2 SV=1 - [E9QAD1_MOUSE]               | 20.09 | 4  | 3  | 3  | 8   | 1.34 | 1.14 | 0.95 | 0.93 | 0.74 | 1.21 | 0.94 | 1.10 | 0.94 | 1.34 | 1.05 | 1.04 | 0.86 | 24.01  | 8.10 |
| F7A8R0   | N-alpha-acetyltransferase 35, NatC auxiliary subunit (Fragment) OS=Mus musculus GN=Naa35 PE=2 SV=1 - [F7A8R0_MOUSE] | 6.97  | 5  | 2  | 2  | 3   | 1.19 | 1.24 | 1.04 | 1.18 | 0.99 | 1.03 | 0.86 | 1.10 | 0.92 | 1.13 | 0.95 | 1.25 | 1.05 | 45.39  | 5.36 |
| P80560   | Receptor-type tyrosine-protein phosphatase N2 OS=Mus musculus GN=Ptpn2 PE=1 SV=2 - [PTPR2_MOUSE]                    | 18.18 | 1  | 14 | 14 | 62  | 1.20 | 1.03 | 0.79 | 1.04 | 0.81 | 1.15 | 0.93 | 1.10 | 0.89 | 1.15 | 0.92 | 1.16 | 0.94 | 111.43 | 5.95 |
| Q9CR29   | Coiled-coil domain-containing protein 43 OS=Mus musculus GN=Ccdc43 PE=1 SV=1 - [CCD43_MOUSE]                        | 35.14 | 3  | 9  | 9  | 28  | 1.21 | 0.78 | 0.70 | 1.01 | 0.81 | 1.20 | 0.98 | 1.10 | 0.89 | 1.07 | 0.89 | 1.12 | 0.83 | 25.03  | 4.97 |
| P16092-6 | Isoform 6 of Fibroblast growth factor receptor 1 OS=Mus musculus GN=Fgfr1 - [FGFR1_MOUSE]                           | 2.07  | 53 | 1  | 2  | 6   | 1.13 | 1.17 | 1.04 | 1.01 | 0.89 | 1.10 | 0.97 | 1.10 | 0.97 | 1.08 | 0.96 | 1.06 | 0.95 | 91.61  | 6.21 |
| Q8R0A6   | V-set and transmembrane domain-containing protein 2A OS=Mus musculus GN=Vstm2a PE=2 SV=2 - [VTM2A_MOUSE]            | 18.22 | 2  | 2  | 2  | 3   | 1.10 | 0.73 | 0.85 | 0.97 | 0.91 | 1.28 | 1.15 | 1.10 | 1.02 | 0.85 | 0.78 | 0.89 | 0.87 | 25.86  | 8.27 |
| B1AQX6   | SRC kinase-signaling inhibitor 1 OS=Mus musculus GN=Srcin1 PE=2 SV=1 - [B1AQX6_MOUSE]                               | 48.72 | 4  | 2  | 43 | 157 | 1.09 | 1.30 | 1.19 | 1.14 | 1.04 | 1.10 | 1.00 | 1.10 | 1.01 | 0.90 | 0.83 | 0.92 | 0.84 | 126.91 | 9.36 |
| E9PXF0   | Protein Pcdh17 OS=Mus musculus GN=Pcdh17 PE=2 SV=1 - [E9PXF0_MOUSE]                                                 | 12.45 | 1  | 9  | 9  | 21  | 1.17 | 1.08 | 0.89 | 1.05 | 0.88 | 1.13 | 0.92 | 1.10 | 0.93 | 1.25 | 1.07 | 1.24 | 1.00 | 126.07 | 5.21 |



|          |                                                                                                                            |       |   |    |    |     |      |      |      |      |      |      |      |      |      |      |      |      |      |        |      |
|----------|----------------------------------------------------------------------------------------------------------------------------|-------|---|----|----|-----|------|------|------|------|------|------|------|------|------|------|------|------|------|--------|------|
| Q3TGF2   | Protein FAM107B<br>OS=Mus musculus<br>GN=Fam107b PE=2<br>SV=2 -<br>[F107B_MOUSE]                                           | 28.24 | 5 | 3  | 4  | 8   | 1.14 | 0.96 | 0.83 | 0.87 | 0.74 | 1.15 | 1.02 | 1.10 | 0.93 | 1.08 | 0.95 | 0.92 | 0.80 | 15.56  | 8.31 |
| Q8VD12-  | Isoform 2 of Zinc<br>finger protein 385A<br>OS=Mus musculus<br>GN=ZnF385a<br>[Z385A_MOUSE]                                 | 4.37  | 2 | 1  | 1  | 2   | 1.09 | 1.29 | 1.18 | 1.23 | 1.13 | 1.01 | 0.92 | 1.10 | 1.00 | 1.00 | 0.91 | 0.85 | 0.78 | 38.31  | 9.74 |
| E0CXA7   | Inhibitor of growth<br>protein 2 (Fragment)<br>OS=Mus musculus<br>GN=Ing2 PE=2 SV=1 -<br>[E0CXA7_MOUSE]                    | 11.72 | 3 | 1  | 1  | 2   | 1.03 | 1.12 | 1.09 | 1.17 | 1.14 | 1.15 | 1.11 | 1.10 | 1.07 | 1.23 | 1.20 | 1.28 | 1.25 | 16.78  | 7.59 |
| Q8R1C0   | Potassium voltage-<br>gated channel<br>subfamily C member 4<br>OS=Mus musculus<br>GN=Kcnc4 PE=2<br>SV=1 -<br>[KCNC4_MOUSE] | 8.28  | 1 | 2  | 3  | 4   | 1.03 | 1.31 | 1.27 | 1.25 | 1.21 | 1.00 | 0.96 | 1.10 | 1.06 | 1.18 | 1.14 | 1.02 | 0.99 | 68.61  | 7.05 |
| Q9JKS4-3 | Isoform 3 of LIM<br>domain-binding protein<br>3 OS=Mus musculus<br>GN=Ldb3 -<br>[LDB3_MOUSE]                               | 14.37 | 7 | 7  | 7  | 13  | 0.94 | 1.05 | 1.10 | 0.98 | 0.98 | 1.86 | 2.03 | 1.10 | 1.03 | 1.05 | 1.21 | 0.99 | 1.00 | 70.71  | 7.96 |
| Q78HU3   | Multivesicular body<br>subunit 12A OS=Mus<br>musculus GN=Mvb12a<br>PE=1 SV=1 -<br>[MB12A_MOUSE]                            | 3.69  | 1 | 1  | 1  | 2   | 0.89 | 0.73 | 0.81 | 0.96 | 1.07 | 0.98 | 1.09 | 1.10 | 1.23 | 0.93 | 1.05 | 0.92 | 1.04 | 28.69  | 9.11 |
| Q5XG69   | Soluble lamin-<br>associated protein of 75<br>kDa OS=Mus<br>musculus<br>GN=Fam169a PE=1<br>SV=3 -<br>[F169A_MOUSE]         | 15.64 | 1 | 8  | 8  | 11  | 0.98 | 1.00 | 1.02 | 1.05 | 0.94 | 1.01 | 0.90 | 1.10 | 1.09 | 1.03 | 1.09 | 1.01 | 0.98 | 73.19  | 4.68 |
| P21995   | Embigin OS=Mus<br>musculus GN=Emb<br>PE=1 SV=2 -<br>[EMB_MOUSE]                                                            | 9.39  | 1 | 3  | 3  | 6   | 1.00 | 1.38 | 1.31 | 1.16 | 1.16 | 1.14 | 1.07 | 1.10 | 1.17 | 1.16 | 1.27 | 1.41 | 1.43 | 37.04  | 6.02 |
| G5E843   | Roundabout homolog 1<br>OS=Mus musculus<br>GN=Robo1 PE=4<br>SV=1 -<br>[G5E843_MOUSE]                                       | 7.88  | 2 | 8  | 9  | 18  | 1.09 | 1.16 | 1.01 | 0.97 | 0.86 | 1.17 | 1.06 | 1.10 | 1.00 | 1.15 | 1.12 | 1.25 | 1.12 | 176.27 | 6.19 |
| P60867   | 40S ribosomal protein<br>S20 OS=Mus<br>musculus GN=Rps20<br>PE=1 SV=1 -<br>[RS20_MOUSE]                                    | 19.33 | 1 | 2  | 2  | 14  | 1.07 | 1.14 | 1.06 | 0.95 | 0.99 | 1.11 | 1.07 | 1.10 | 1.02 | 1.03 | 1.02 | 0.96 | 0.98 | 13.36  | 9.94 |
| P97315   | Cysteine and glycine-<br>rich protein 1 OS=Mus<br>musculus GN=Csrp1<br>PE=1 SV=3 -<br>[CSR1_MOUSE]                         | 67.88 | 1 | 13 | 13 | 325 | 1.06 | 0.84 | 0.77 | 0.91 | 0.85 | 1.13 | 1.05 | 1.10 | 1.03 | 0.98 | 0.95 | 0.94 | 0.90 | 20.57  | 8.57 |
| Q3UFK8   | FERM domain-<br>containing protein 8<br>OS=Mus musculus<br>GN=Frmd8 PE=1<br>SV=2 -<br>[FRMD8_MOUSE]                        | 4.29  | 1 | 2  | 2  | 3   | 1.00 | 1.06 | 1.06 | 0.98 | 0.98 | 1.01 | 1.00 | 1.10 | 1.10 | 1.03 | 1.03 | 1.18 | 1.18 | 51.80  | 6.44 |

|        |                                                                                                                                         |       |   |    |    |     |      |      |      |      |      |      |      |      |      |      |      |      |      |        |      |
|--------|-----------------------------------------------------------------------------------------------------------------------------------------|-------|---|----|----|-----|------|------|------|------|------|------|------|------|------|------|------|------|------|--------|------|
| A2AQT8 | Methylmalonic aciduria and homocystinuria type D homolog, mitochondrial (Fragment) OS=Mus musculus GN=Mmadhc PE=2 SV=1 - [A2AQT8_MOUSE] | 7.82  | 3 | 1  | 1  | 2   | 0.89 | 1.06 | 1.19 | 0.90 | 1.00 | 1.05 | 1.17 | 1.10 | 1.23 | 1.11 | 1.25 | 0.84 | 0.94 | 19.79  | 5.19 |
| O88532 | Zinc finger RNA-binding protein OS=Mus musculus GN=Zfr PE=1 SV=2 - [ZFR_MOUSE]                                                          | 21.23 | 5 | 15 | 15 | 34  | 0.94 | 0.97 | 1.08 | 1.04 | 1.07 | 1.02 | 1.11 | 1.10 | 1.18 | 1.02 | 1.03 | 0.99 | 1.04 | 116.79 | 9.04 |
| Q6IRU5 | Clathrin light chain B OS=Mus musculus GN=Cltb PE=2 SV=1 - [CLCB_MOUSE]                                                                 | 43.67 | 3 | 1  | 14 | 314 | 1.00 | 0.77 | 0.77 | 0.90 | 0.91 | 1.12 | 1.10 | 1.10 | 1.10 | 0.98 | 1.03 | 0.89 | 0.90 | 25.16  | 4.63 |
| E9QP99 | Golgin subfamily A member 3 OS=Mus musculus GN=Golga3 PE=2 SV=1 - [E9QP99_MOUSE]                                                        | 39.41 | 4 | 43 | 43 | 120 | 1.03 | 0.93 | 0.93 | 0.91 | 0.88 | 1.03 | 0.99 | 1.10 | 1.07 | 1.01 | 0.93 | 0.93 | 0.91 | 167.19 | 5.38 |
| Q8BG77 | Survival of motor neuron-related-splicing factor 30 OS=Mus musculus GN=Smdc1 PE=2 SV=1 - [SPF30_MOUSE]                                  | 21.85 | 1 | 3  | 3  | 8   | 1.11 | 0.73 | 0.61 | 1.04 | 0.80 | 1.15 | 1.09 | 1.10 | 1.02 | 0.94 | 0.99 | 1.00 | 0.81 | 26.74  | 7.24 |
| Q60648 | Ganglioside GM2 activator OS=Mus musculus GN=Gm2a PE=1 SV=2 - [SAP3_MOUSE]                                                              | 24.35 | 1 | 4  | 4  | 5   | 1.02 | 0.91 | 0.82 | 0.94 | 0.91 | 1.18 | 1.11 | 1.10 | 1.01 | 0.98 | 1.02 | 0.90 | 0.88 | 20.81  | 5.90 |
| A2A7B5 | Protein Prdm2 OS=Mus musculus GN=Prdm2 PE=2 SV=1 - [A2A7B5_MOUSE]                                                                       | 2.40  | 1 | 2  | 2  | 3   | 1.13 | 1.26 | 1.12 | 1.06 | 0.94 | 1.06 | 0.94 | 1.10 | 0.97 | 1.08 | 0.96 | 1.07 | 0.95 | 187.09 | 8.00 |
| O35972 | 39S ribosomal protein L23, mitochondrial OS=Mus musculus GN=Mrlp23 PE=2 SV=1 - [RM23_MOUSE]                                             | 29.45 | 1 | 3  | 3  | 5   | 0.94 | 1.25 | 1.33 | 1.14 | 1.21 | 1.03 | 1.09 | 1.10 | 1.17 | 1.10 | 1.22 | 1.12 | 1.20 | 17.11  | 9.76 |
| Q9D832 | Dnaj homolog subfamily B member 4 OS=Mus musculus GN=Dnajb4 PE=2 SV=1 - [DNJB4_MOUSE]                                                   | 27.89 | 1 | 7  | 8  | 15  | 1.12 | 0.92 | 0.83 | 0.98 | 0.92 | 1.14 | 0.98 | 1.10 | 1.02 | 1.03 | 0.97 | 0.97 | 0.93 | 37.76  | 8.59 |
| Q8C7E9 | Cleavage stimulation factor subunit 2 tau variant OS=Mus musculus GN=Cstf2t PE=1 SV=2 - [CSTFT_MOUSE]                                   | 19.94 | 1 | 1  | 8  | 26  | 0.83 | 0.94 | 1.14 | 0.85 | 1.03 | 1.06 | 1.27 | 1.10 | 1.32 | 0.97 | 1.18 | 0.88 | 1.07 | 65.82  | 7.25 |
| G5E8J8 | MCG14253, isoform CRA_a OS=Mus musculus GN=Wiz PE=4 SV=1 - [G5E8J8_MOUSE]                                                               | 1.68  | 5 | 1  | 1  | 2   | 1.12 | 1.31 | 1.17 | 0.97 | 0.86 | 1.08 | 0.96 | 1.10 | 0.98 | 1.11 | 0.99 | 1.19 | 1.06 | 102.87 | 9.01 |
| Q99M07 | Cytochrome c oxidase assembly factor 5 OS=Mus musculus GN=Coa5 PE=2 SV=1 [COA5_MOUSE]                                                   | 13.51 | 1 | 1  | 1  | 2   | 1.04 | 0.63 | 0.61 | 1.05 | 1.01 | 1.09 | 1.05 | 1.10 | 1.06 | 1.10 | 1.06 | 0.96 | 0.93 | 8.35   | 8.70 |

|          |                                                                                                   |       |   |    |    |      |      |      |      |      |      |      |      |      |      |      |      |      |      |        |       |
|----------|---------------------------------------------------------------------------------------------------|-------|---|----|----|------|------|------|------|------|------|------|------|------|------|------|------|------|------|--------|-------|
| Q923W1   | Trimethylguanosine synthase OS=Mus musculus GN=Tgs1 PE=1 SV=2 - [TGS1_MOUSE]                      | 2.11  | 2 | 2  | 2  | 3    | 1.13 | 1.25 | 1.11 | 1.03 | 0.91 | 1.06 | 0.93 | 1.10 | 0.97 | 1.20 | 1.07 | 1.24 | 1.10 | 96.73  | 4.97  |
| Q9D3D9   | ATP synthase subunit delta, mitochondrial OS=Mus musculus GN=Atp5d PE=1 SV=1 - [ATPD_MOUSE]       | 58.33 | 2 | 4  | 4  | 244  | 0.96 | 0.95 | 0.99 | 0.90 | 0.94 | 1.10 | 1.15 | 1.10 | 1.17 | 1.03 | 1.05 | 0.96 | 1.00 | 17.59  | 5.08  |
| Q3UUF8   | Ankyrin repeat domain-containing protein 34B OS=Mus musculus GN=Ankr34b PE=1 SV=1 - [AN34B_MOUSE] | 6.30  | 1 | 3  | 3  | 7    | 1.07 | 0.86 | 0.78 | 1.03 | 0.94 | 1.04 | 0.96 | 1.10 | 1.00 | 1.10 | 1.02 | 1.20 | 1.10 | 55.38  | 8.02  |
| Q8BTJ4-2 | Isoform 2 of Bis(5'-adenosyl)-triphosphatase enpp4 OS=Mus musculus GN=Enpp4 - [ENPP4_MOUSE]       | 9.46  | 4 | 3  | 4  | 8    | 1.00 | 0.85 | 0.85 | 0.81 | 0.81 | 0.80 | 0.79 | 1.10 | 1.09 | 0.70 | 0.70 | 0.98 | 0.98 | 47.87  | 6.73  |
| Q8BUR3-  | Isoform 2 of Forkhead box protein J3 OS=Mus musculus GN=Foxj3 - [FOXJ3_MOUSE]                     | 5.94  | 2 | 3  | 3  | 6    | 0.96 | 0.85 | 0.87 | 0.80 | 0.98 | 1.04 | 1.19 | 1.10 | 1.17 | 0.90 | 1.07 | 0.90 | 1.04 | 65.49  | 7.17  |
| Q7TNG8   | Probable D-lactate dehydrogenase, mitochondrial OS=Mus musculus GN=Ldhd PE=1 SV=1 - [LDHD_MOUSE]  | 3.10  | 1 | 1  | 1  | 2    | 0.92 | 1.77 | 1.91 | 1.61 | 1.74 | 1.17 | 1.25 | 1.10 | 1.18 | 1.48 | 1.60 | 1.09 | 1.18 | 51.82  | 6.62  |
| Q9WUD1   | STIP1 homology and U box-containing protein 1 OS=Mus musculus GN=Stub1 PE=1 SV=1 - [CHIP_MOUSE]   | 63.49 | 1 | 16 | 16 | 47   | 0.90 | 0.81 | 0.97 | 0.84 | 0.92 | 1.07 | 1.19 | 1.10 | 1.20 | 0.97 | 1.03 | 0.91 | 1.00 | 34.89  | 6.01  |
| Q91Z69   | SLIT-ROBO Rho GTPase-activating protein 1 OS=Mus musculus GN=Srgap1 PE=1 SV=2 - [SRGP1_MOUSE]     | 7.44  | 3 | 1  | 7  | 9    | 0.72 | 0.95 | 1.31 | 0.98 | 1.36 | 1.16 | 1.61 | 1.10 | 1.52 | 1.06 | 1.48 | 0.97 | 1.35 | 121.35 | 6.74  |
| D3Z3D9   | Beta-chimaerin OS=Mus musculus GN=Chn2 PE=2 SV=1 - [D3Z3D9_MOUSE]                                 | 8.67  | 2 | 1  | 1  | 2    | 0.89 | 1.23 | 1.37 | 1.11 | 1.23 | 1.28 | 1.43 | 1.10 | 1.22 | 1.17 | 1.31 | 1.12 | 1.25 | 22.36  | 8.37  |
| Q3UHH1   | TNF receptor-associated factor 3 OS=Mus musculus GN=Traf3 PE=2 SV=1 - [Q3UHH1_MOUSE]              | 10.52 | 3 | 5  | 5  | 11   | 1.16 | 1.00 | 0.96 | 1.05 | 0.85 | 1.04 | 0.83 | 1.10 | 0.88 | 1.13 | 0.97 | 1.13 | 1.05 | 61.52  | 8.03  |
| P04370-4 | Isoform 4 of Myelin basic protein OS=Mus musculus GN=Mbp - [MBP_MOUSE]                            | 68.72 | 5 | 2  | 22 | 1095 | 0.94 | 0.84 | 0.90 | 1.03 | 1.09 | 1.23 | 1.31 | 1.10 | 1.21 | 1.11 | 1.19 | 1.14 | 1.23 | 21.49  | 11.24 |
| Q99JF8   | PC4 and SFRS1-interacting protein OS=Mus musculus GN=Pstip1 PE=1 SV=1 - [PSIP1_MOUSE]             | 47.92 | 3 | 4  | 24 | 152  | 1.03 | 0.97 | 0.86 | 1.11 | 1.01 | 1.13 | 1.00 | 1.10 | 1.11 | 1.17 | 1.04 | 1.13 | 1.11 | 59.66  | 9.13  |

|          |                                                                                                                                 |       |   |    |    |     |      |      |      |      |      |      |      |      |      |      |      |      |      |        |       |
|----------|---------------------------------------------------------------------------------------------------------------------------------|-------|---|----|----|-----|------|------|------|------|------|------|------|------|------|------|------|------|------|--------|-------|
| Q9CPW4   | Actin-related protein 2/3 complex subunit 5<br>OS=Mus musculus<br>GN=Arpc5 PE=2<br>SV=3 -<br>[ARPC5_MOUSE]                      | 52.32 | 2 | 8  | 8  | 38  | 1.10 | 1.02 | 0.93 | 1.05 | 1.01 | 1.22 | 1.07 | 1.10 | 0.99 | 1.12 | 1.04 | 1.05 | 1.00 | 16.28  | 5.67  |
| Q9CQP3   | Coiled-coil-helix-coiled-coil-helix domain-containing protein 5<br>OS=Mus musculus<br>GN=Chchd5 PE=2<br>SV=1 -<br>[CHCH5_MOUSE] | 23.64 | 1 | 2  | 2  | 6   | 1.11 | 0.90 | 0.71 | 1.05 | 0.84 | 1.10 | 1.01 | 1.10 | 0.99 | 0.99 | 0.87 | 0.97 | 0.85 | 12.32  | 7.31  |
| Q9CZ83   | 39S ribosomal protein L55, mitochondrial<br>OS=Mus musculus<br>GN=Mrpl55 PE=2<br>SV=1 -<br>[RM55_MOUSE]                         | 24.41 | 2 | 2  | 2  | 19  | 1.03 | 1.25 | 1.08 | 0.96 | 0.96 | 1.03 | 0.95 | 1.10 | 0.96 | 0.96 | 0.99 | 1.07 | 1.03 | 15.11  | 10.51 |
| O70251   | Elongation factor 1-beta<br>OS=Mus musculus<br>GN=Eef1b<br>PE=1 SV=5 -<br>[EF1B_MOUSE]                                          | 67.11 | 5 | 11 | 13 | 210 | 1.00 | 0.81 | 0.87 | 0.90 | 0.94 | 1.14 | 1.16 | 1.10 | 1.13 | 1.02 | 1.02 | 0.90 | 0.97 | 24.68  | 4.69  |
| Q60575-2 | Isoform 2 of Kinesin-like protein KIF1B<br>OS=Mus musculus<br>GN=Kif1b -<br>[KIF1B_MOUSE]                                       | 7.06  | 6 | 2  | 10 | 25  | 1.10 | 1.37 | 1.24 | 0.96 | 0.87 | 1.13 | 1.02 | 1.10 | 1.00 | 1.11 | 1.01 | 1.07 | 0.97 | 198.80 | 5.59  |
| G3UX26   | Voltage-dependent anion-selective channel protein 2 (Fragment)<br>OS=Mus musculus<br>GN=Vdac2 PE=4<br>SV=1 -<br>[G3UX26_MOUSE]  | 61.48 | 4 | 12 | 12 | 134 | 1.07 | 1.09 | 1.03 | 1.21 | 1.15 | 1.14 | 1.07 | 1.10 | 1.05 | 1.15 | 1.10 | 1.24 | 1.13 | 30.43  | 7.58  |
| G3X9N3   | MCG16539<br>OS=Mus musculus<br>GN=Pmal2<br>PE=4 SV=1 -<br>[G3X9N3_MOUSE]                                                        | 21.33 | 1 | 11 | 11 | 25  | 1.05 | 1.04 | 0.83 | 1.10 | 0.97 | 1.17 | 1.01 | 1.10 | 1.11 | 1.11 | 1.04 | 1.12 | 1.08 | 71.71  | 5.17  |
| Q6WKZ8   | E3 ubiquitin-protein ligase UBR2<br>OS=Mus musculus<br>GN=Ubr2<br>PE=1 SV=2 -<br>[UBR2_MOUSE]                                   | 0.74  | 2 | 1  | 1  | 2   | 0.87 | 0.95 | 1.10 | 1.13 | 1.30 | 0.84 | 0.96 | 1.10 | 1.26 | 0.88 | 1.01 | 1.15 | 1.33 | 199.03 | 6.33  |
| B0QZH9   | PHD finger protein 23 (Fragment)<br>OS=Mus musculus<br>GN=Phf23<br>PE=2 SV=1 -<br>[B0QZH9_MOUSE]                                | 6.74  | 4 | 1  | 1  | 2   | 1.11 | 1.19 | 1.07 | 1.09 | 0.98 | 1.10 | 0.98 | 1.10 | 0.99 | 1.25 | 1.13 | 1.33 | 1.20 | 20.86  | 10.08 |
| Q9DAU1   | Protein canopy homolog 3<br>OS=Mus musculus<br>GN=Cnpy3<br>PE=1 SV=1 -<br>[CNPY3_MOUSE]                                         | 38.41 | 3 | 9  | 9  | 44  | 1.06 | 0.85 | 0.90 | 0.97 | 0.92 | 1.12 | 1.07 | 1.10 | 1.05 | 1.03 | 0.95 | 0.92 | 0.87 | 30.52  | 5.62  |
| B7ZC84   | Serine/threonine-protein kinase tousled-like 2 (Fragment)<br>OS=Mus musculus<br>GN=Itk2 PE=2 SV=1 -<br>[B7ZC84_MOUSE]           | 8.60  | 6 | 1  | 1  | 1   | 1.00 | 0.90 | 0.90 | 0.99 | 0.99 | 1.06 | 1.06 | 1.10 | 1.10 | 1.04 | 1.04 | 1.08 | 1.08 | 10.38  | 7.34  |

|         |                                                                                                     |       |   |    |    |    |      |      |      |      |      |      |      |      |      |      |      |      |      |       |       |
|---------|-----------------------------------------------------------------------------------------------------|-------|---|----|----|----|------|------|------|------|------|------|------|------|------|------|------|------|------|-------|-------|
| Q9DB60  | Prostamide/prostaglandin F synthase OS=Mus musculus GN=Fam213b PE=1 SV=1 - [PGFS_MOUSE]             | 16.42 | 2 | 3  | 3  | 5  | 0.59 | 0.99 | 1.68 | 0.85 | 1.13 | 0.83 | 1.00 | 1.10 | 0.95 | 1.08 | 1.10 | 0.93 | 1.26 | 21.66 | 6.74  |
| Q60772  | Cyclin-dependent kinase 4 inhibitor C OS=Mus musculus GN=Cdkn2c PE=2 SV=1 - [CDN2C_MOUSE]           | 7.74  | 1 | 1  | 1  | 2  | 1.11 | 0.89 | 0.80 | 0.73 | 0.65 | 1.22 | 1.09 | 1.10 | 0.98 | 1.12 | 1.01 | 0.92 | 0.83 | 18.06 | 6.00  |
| P62855  | 40S ribosomal protein S26 OS=Mus musculus GN=Rps26 PE=2 SV=3 - [RS26_MOUSE]                         | 20.87 | 1 | 2  | 2  | 8  | 1.03 | 1.10 | 1.07 | 0.99 | 1.14 | 1.08 | 1.20 | 1.10 | 1.08 | 1.10 | 1.07 | 0.99 | 1.09 | 13.01 | 11.00 |
| Q9CQ56- | Isoform 2 of Vesicle transport protein USE1 OS=Mus musculus GN=Use1 - [USE1_MOUSE]                  | 12.11 | 3 | 2  | 2  | 4  | 0.86 | 1.09 | 1.26 | 1.00 | 1.15 | 1.03 | 1.18 | 1.10 | 1.27 | 1.17 | 1.35 | 1.06 | 1.23 | 21.46 | 9.54  |
| P21661  | Neuroendocrine convertase 2 OS=Mus musculus GN=Pesk2 PE=2 SV=1 - [NEC2_MOUSE]                       | 14.76 | 1 | 7  | 7  | 19 | 1.00 | 0.92 | 0.92 | 0.98 | 0.99 | 1.04 | 1.04 | 1.10 | 1.05 | 0.99 | 1.03 | 0.96 | 0.91 | 70.74 | 6.42  |
| E9PUH0  | Protein A430005L14Rik OS=Mus musculus GN=A430005L14Rik PE=2 SV=1 - [E9PUH0_MOUSE]                   | 17.71 | 2 | 3  | 3  | 5  | 0.98 | 0.93 | 0.95 | 1.06 | 0.98 | 1.31 | 1.21 | 1.10 | 1.29 | 0.87 | 1.00 | 0.91 | 0.97 | 20.90 | 5.15  |
| Q9JKV5  | Secretory carrier-associated membrane protein 4 OS=Mus musculus GN=Scamp4 PE=2 SV=1 - [SCAM4_MOUSE] | 4.78  | 1 | 1  | 1  | 4  | 1.18 | 1.77 | 1.50 | 1.41 | 1.19 | 1.18 | 1.00 | 1.10 | 0.93 | 1.11 | 0.95 | 1.02 | 0.87 | 25.33 | 8.66  |
| Q99PL6  | UBX domain-containing protein 6 OS=Mus musculus GN=Ubxn6 PE=1 SV=1 - [UBXN6_MOUSE]                  | 26.02 | 3 | 10 | 10 | 26 | 0.96 | 1.01 | 1.00 | 0.97 | 1.07 | 1.13 | 1.13 | 1.10 | 1.18 | 1.10 | 1.22 | 1.06 | 1.11 | 49.77 | 8.54  |
| A2BDX3  | Adenylyltransferase and sulfurtransferase MOCS3 OS=Mus musculus GN=Mocs3 PE=2 SV=1 - [MOCS3_MOUSE]  | 3.48  | 1 | 1  | 1  | 2  | 1.02 | 1.11 | 1.09 | 1.13 | 1.11 | 0.85 | 0.84 | 1.10 | 1.08 | 0.93 | 0.91 | 1.17 | 1.15 | 49.34 | 7.49  |
| E9Q389  | Gametogenetin-binding protein 2 (Fragment) OS=Mus musculus GN=Ggnbp2 PE=2 SV=1 - [E9Q389_MOUSE]     | 11.90 | 6 | 1  | 1  | 7  | 0.96 | 1.21 | 1.24 | 1.09 | 1.19 | 0.91 | 1.03 | 1.10 | 1.13 | 0.87 | 0.91 | 1.12 | 1.22 | 9.64  | 5.08  |
| Q9D7S9  | Charged multivesicular body protein 5 OS=Mus musculus GN=Chmp5 PE=2 SV=1 - [CHMP5_MOUSE]            | 40.64 | 1 | 6  | 6  | 21 | 1.07 | 0.90 | 0.84 | 0.94 | 0.87 | 1.20 | 1.10 | 1.10 | 1.00 | 1.04 | 1.02 | 0.99 | 0.95 | 24.56 | 4.79  |

|        |                                                                                                                            |       |   |    |    |     |      |      |      |      |      |      |      |      |      |      |      |      |      |        |       |
|--------|----------------------------------------------------------------------------------------------------------------------------|-------|---|----|----|-----|------|------|------|------|------|------|------|------|------|------|------|------|------|--------|-------|
| G3UZJ2 | Microtubule-associated protein (Fragment)<br>OS=Mus musculus<br>GN=Map2 PE=2 SV=1<br>-[G3UZJ2_MOUSE]                       | 73.86 | 1 | 2  | 22 | 748 | 1.20 | 0.94 | 0.88 | 1.06 | 0.82 | 1.13 | 0.93 | 1.10 | 0.93 | 1.07 | 0.86 | 1.05 | 0.89 | 25.74  | 11.09 |
| Q80T85 | DDB1- and CUL4-associated factor 5<br>OS=Mus musculus<br>GN=Dcaf5 PE=1<br>SV=2 -<br>[DCAF5_MOUSE]                          | 2.96  | 1 | 2  | 2  | 6   | 0.92 | 0.90 | 1.07 | 0.87 | 1.01 | 1.09 | 1.15 | 1.10 | 1.30 | 0.92 | 1.03 | 0.79 | 0.83 | 103.61 | 5.80  |
| Q8BK12 | Trinucleotide repeat-containing gene 6B protein<br>OS=Mus musculus<br>GN=Tnrc6b PE=2 SV=2 -<br>[TNR6B_MOUSE]               | 20.17 | 2 | 22 | 22 | 69  | 1.01 | 0.94 | 0.91 | 0.96 | 0.97 | 1.07 | 1.06 | 1.10 | 1.03 | 0.99 | 0.99 | 0.94 | 0.95 | 191.85 | 6.30  |
| O88271 | Craniofacial development protein 1<br>OS=Mus musculus<br>GN=Cfdp1 PE=1<br>SV=1 -<br>[CFDP1_MOUSE]                          | 35.59 | 1 | 10 | 10 | 33  | 1.03 | 0.83 | 0.79 | 1.02 | 0.99 | 1.14 | 1.10 | 1.10 | 1.11 | 1.06 | 1.00 | 1.06 | 1.01 | 32.90  | 4.86  |
| Q5F2E7 | Nuclear fragile X mental retardation-interacting protein 2<br>OS=Mus musculus<br>GN=Nufip2 PE=1<br>SV=1 -<br>[NUFP2_MOUSE] | 29.91 | 2 | 13 | 13 | 39  | 0.98 | 0.75 | 0.80 | 0.92 | 0.94 | 1.15 | 1.17 | 1.10 | 1.13 | 1.02 | 0.98 | 0.87 | 0.92 | 75.61  | 8.70  |
| A2A5R2 | Brefeldin A-inhibited guanine nucleotide-exchange protein 2<br>OS=Mus musculus<br>GN=Arfge2 PE=1<br>SV=1 -<br>[BIG2_MOUSE] | 9.26  | 4 | 9  | 9  | 15  | 0.96 | 1.34 | 1.42 | 1.29 | 1.33 | 0.95 | 0.99 | 1.10 | 1.14 | 1.14 | 1.22 | 1.25 | 1.29 | 202.11 | 6.55  |
| Q8VC15 | Peroxisomal biogenesis factor 19<br>OS=Mus musculus<br>GN=Pex19 PE=1 SV=1 -<br>[PEX19_MOUSE]                               | 47.83 | 2 | 9  | 9  | 44  | 1.02 | 0.99 | 0.86 | 0.93 | 0.90 | 1.14 | 1.11 | 1.10 | 1.05 | 0.97 | 0.97 | 0.93 | 0.87 | 32.71  | 4.34  |
| H7BWy8 | Pre-rRNA-processing protein TSR2 homolog<br>OS=Mus musculus<br>GN=Tsr2 PE=2 SV=1 -<br>[H7BWy8_MOUSE]                       | 46.15 | 3 | 6  | 6  | 64  | 1.35 | 0.88 | 0.69 | 0.97 | 0.76 | 1.18 | 0.87 | 1.10 | 0.83 | 1.08 | 0.83 | 1.10 | 0.88 | 21.37  | 4.26  |
| A0A4W9 | Neuronal growth regulator 1<br>OS=Mus musculus<br>GN=Negr1 PE=2 SV=1 -<br>[A0A4W9_MOUSE]                                   | 51.37 | 4 | 13 | 13 | 195 | 1.01 | 1.08 | 1.06 | 0.97 | 0.96 | 1.08 | 1.07 | 1.10 | 1.09 | 1.07 | 1.03 | 1.08 | 1.06 | 36.10  | 6.86  |
| Q9QUN3 | B-cell linker protein<br>OS=Mus musculus<br>GN=Blnk PE=1 SV=1 -<br>[BLNK_MOUSE]                                            | 10.72 | 2 | 2  | 2  | 8   | 0.92 | 0.91 | 1.09 | 1.05 | 1.01 | 1.15 | 1.25 | 1.10 | 1.34 | 1.07 | 1.30 | 0.92 | 1.01 | 50.64  | 8.25  |
| Q80WW9 | DDRGGK domain-containing protein 1<br>OS=Mus musculus<br>GN=Drngk1 PE=1<br>SV=2 -<br>[DDRGGK_MOUSE]                        | 5.40  | 1 | 1  | 1  | 2   | 1.15 | 1.11 | 0.97 | 0.91 | 0.79 | 1.34 | 1.16 | 1.10 | 0.96 | 1.28 | 1.11 | 1.45 | 1.27 | 35.96  | 5.35  |

|          |                                                                                                                |       |   |    |    |     |      |      |      |      |      |      |      |      |      |      |      |      |      |        |      |
|----------|----------------------------------------------------------------------------------------------------------------|-------|---|----|----|-----|------|------|------|------|------|------|------|------|------|------|------|------|------|--------|------|
| B2RXC2   | Inositol 1,4,5-trisphosphate 3-kinase B OS=Mus musculus GN=Ipkb PE=2 SV=1 [B2RXC2_MOUSE]                       | 3.08  | 1 | 1  | 2  | 5   | 1.28 | 1.06 | 0.83 | 0.97 | 0.76 | 1.10 | 0.86 | 1.10 | 0.86 | 1.13 | 0.88 | 1.16 | 0.91 | 102.61 | 8.00 |
| F6W810   | YjeF N-terminal domain-containing protein 3 OS=Mus musculus GN=Yjefn3 PE=2 SV=2 [YJEN3_MOUSE]                  | 3.59  | 1 | 1  | 1  | 1   | 0.97 | 1.03 | 1.05 | 1.02 | 1.05 | 1.09 | 1.12 | 1.10 | 1.13 | 1.04 | 1.07 | 1.18 | 1.21 | 27.00  | 7.40 |
| Q03717   | Potassium voltage-gated channel subfamily B member 1 OS=Mus musculus GN=Kcnb1 PE=1 SV=2 [KCNB1_MOUSE]          | 13.54 | 1 | 6  | 6  | 13  | 0.99 | 1.29 | 1.30 | 0.97 | 1.05 | 1.07 | 1.07 | 1.10 | 1.14 | 0.93 | 1.00 | 0.93 | 0.95 | 95.53  | 8.16 |
| Q8BTG7   | Isoform 2 of Protein NDRG4 OS=Mus musculus GN=Ndrgr4 [NDRG4_MOUSE]                                             | 31.56 | 1 | 1  | 8  | 19  | 1.02 | 1.21 | 1.18 | 1.07 | 1.05 | 0.92 | 0.90 | 1.10 | 1.08 | 1.18 | 1.16 | 1.31 | 1.29 | 37.14  | 5.90 |
| Q61686   | Chromobox protein homolog 5 OS=Mus musculus GN=Cbx5 PE=1 SV=1 [CBX5_MOUSE]                                     | 50.79 | 2 | 10 | 11 | 58  | 1.06 | 0.78 | 0.74 | 0.90 | 0.82 | 1.14 | 1.04 | 1.10 | 1.01 | 1.06 | 1.01 | 0.93 | 0.89 | 22.17  | 5.86 |
| H3BLN5   | Interleukin-33 (Fragment) OS=Mus musculus GN=Il33 PE=2 SV=1 [H3BLN5_MOUSE]                                     | 6.58  | 2 | 1  | 1  | 1   | 1.08 | 1.12 | 1.04 | 0.84 | 0.78 | 1.13 | 1.04 | 1.10 | 1.02 | 1.09 | 1.01 | 1.29 | 1.20 | 25.63  | 9.07 |
| Q6PGF2   | MORN repeat-containing protein 4 OS=Mus musculus GN=Morn4 PE=2 SV=1 [MORN4_MOUSE]                              | 15.75 | 1 | 2  | 2  | 3   | 0.90 | 0.85 | 0.95 | 0.87 | 0.97 | 1.07 | 1.19 | 1.10 | 1.23 | 0.90 | 1.01 | 0.95 | 1.07 | 16.20  | 8.15 |
| Q9DAR0   | Uncharacterized protein C5orf49 homolog OS=Mus musculus PE=1 SV=1 [CE049_MOUSE]                                | 20.88 | 1 | 3  | 3  | 6   | 1.04 | 0.91 | 0.89 | 0.93 | 0.89 | 1.11 | 1.03 | 1.10 | 1.03 | 1.03 | 0.96 | 1.12 | 1.00 | 20.84  | 6.89 |
| G3X922   | MCG115602 OS=Mus musculus GN=Dnajc13 PE=4 SV=1 [G3X922_MOUSE]                                                  | 1.83  | 1 | 2  | 2  | 4   | 0.73 | 1.12 | 1.53 | 1.21 | 1.66 | 0.93 | 1.27 | 1.10 | 1.51 | 1.08 | 1.48 | 1.07 | 1.47 | 254.28 | 6.77 |
| Q60932-2 | Isoform Mt-VDAC1 of Voltage-dependent anion-selective channel protein 1 OS=Mus musculus GN=Vdac1 [VDAC1_MOUSE] | 80.21 | 3 | 18 | 19 | 454 | 1.03 | 1.01 | 0.98 | 1.15 | 1.09 | 1.14 | 1.08 | 1.10 | 1.05 | 1.14 | 1.09 | 1.12 | 1.10 | 30.74  | 8.54 |
| Q99KH8   | Serine/threonine-protein kinase 24 OS=Mus musculus GN=Stk24 PE=1 SV=1 [STK24_MOUSE]                            | 38.52 | 1 | 9  | 13 | 30  | 0.91 | 1.03 | 1.07 | 0.80 | 0.87 | 1.05 | 1.14 | 1.10 | 1.30 | 1.01 | 1.14 | 0.93 | 1.15 | 47.92  | 5.43 |
| Q5QNQ6   | Oxysterol-binding protein 2 OS=Mus musculus GN=Osbp2 PE=2 SV=1 [OSBP2_MOUSE]                                   | 11.78 | 4 | 4  | 7  | 11  | 0.91 | 0.91 | 1.00 | 0.99 | 0.96 | 0.99 | 1.02 | 1.10 | 0.97 | 1.04 | 1.04 | 0.84 | 1.03 | 101.29 | 7.14 |

|          |                                                                                                   |       |   |     |     |     |      |      |      |      |      |      |      |      |      |      |      |      |      |        |      |
|----------|---------------------------------------------------------------------------------------------------|-------|---|-----|-----|-----|------|------|------|------|------|------|------|------|------|------|------|------|------|--------|------|
| O35639   | Annexin A3 OS=Mus musculus GN=Anxa3 PE=1 SV=4 - [ANXA3_MOUSE]                                     | 29.10 | 1 | 6   | 7   | 19  | 1.00 | 1.00 | 0.98 | 1.06 | 1.08 | 1.04 | 1.04 | 1.10 | 1.09 | 1.17 | 1.17 | 1.08 | 1.08 | 36.36  | 5.76 |
| Q8R4I7   | Neuropilin and toll-like protein 1 OS=Mus musculus GN=Neto1 PE=1 SV=2 - [NETO1_MOUSE]             | 5.82  | 1 | 2   | 2   | 3   | 1.06 | 0.91 | 0.86 | 0.86 | 0.81 | 1.11 | 1.04 | 1.10 | 1.04 | 1.01 | 0.96 | 0.99 | 0.93 | 60.20  | 6.99 |
| Q8CE50   | Sorting nexin-30 OS=Mus musculus GN=Snx30 PE=2 SV=1 - [SNX30_MOUSE]                               | 11.21 | 1 | 5   | 5   | 8   | 1.05 | 1.17 | 1.14 | 1.05 | 1.02 | 0.95 | 0.91 | 1.10 | 1.03 | 0.99 | 0.97 | 1.15 | 1.08 | 49.49  | 5.35 |
| E1U8D0   | Protein SOGA1 OS=Mus musculus GN=Soga1 PE=1 SV=3 - [SOGA1_MOUSE]                                  | 3.46  | 2 | 2   | 4   | 12  | 0.92 | 1.14 | 1.25 | 0.94 | 1.04 | 1.15 | 1.24 | 1.10 | 1.28 | 1.28 | 1.28 | 1.23 | 1.34 | 159.09 | 6.46 |
| B7ZNL3   | Tpm1 protein OS=Mus musculus GN=Tpm1 PE=2 SV=1 - [BTZNL3_MOUSE]                                   | 60.56 | 2 | 4   | 22  | 314 | 1.02 | 0.91 | 0.89 | 0.92 | 0.86 | 0.85 | 0.84 | 1.10 | 1.06 | 1.11 | 1.13 | 0.81 | 0.78 | 32.62  | 4.74 |
| F50586-2 | Isoform Short of Tubby protein OS=Mus musculus GN=Tub - [TUB_MOUSE]                               | 11.58 | 2 | 2   | 2   | 4   | 0.91 | 0.88 | 0.97 | 1.03 | 1.13 | 0.96 | 1.05 | 1.10 | 1.21 | 0.86 | 0.95 | 1.00 | 1.02 | 49.53  | 9.41 |
| Q8BH95   | Enoyl-CoA hydratase, mitochondrial OS=Mus musculus GN=Echs1 PE=1 SV=1 - [ECHM_MOUSE]              | 39.66 | 2 | 10  | 10  | 34  | 1.01 | 0.85 | 0.83 | 1.01 | 1.03 | 1.13 | 1.17 | 1.10 | 1.12 | 1.08 | 1.09 | 1.08 | 1.09 | 31.45  | 8.48 |
| Q99JP7   | Gamma-glutamyltransferase 7 OS=Mus musculus GN=Ggt7 PE=1 SV=2 - [GGT7_MOUSE]                      | 26.89 | 3 | 12  | 12  | 39  | 1.01 | 1.06 | 1.02 | 1.01 | 0.97 | 1.00 | 1.00 | 1.10 | 1.05 | 1.03 | 0.98 | 1.02 | 1.00 | 70.21  | 5.06 |
| Q5UAK0   | Isoform 4 of Mesoderm induction early response protein 1 OS=Mus musculus GN=Mier1 - [MIER1_MOUSE] | 5.49  | 5 | 2   | 2   | 4   | 1.29 | 1.04 | 0.81 | 0.95 | 0.74 | 1.12 | 0.87 | 1.10 | 0.85 | 0.93 | 0.76 | 1.02 | 0.88 | 57.79  | 4.46 |
| Q9QYX7   | Protein piccolo OS=Mus musculus GN=Pclo PE=1 SV=4 - [PCLO_MOUSE]                                  | 46.05 | 2 | 174 | 182 | 946 | 1.00 | 0.87 | 0.88 | 0.97 | 0.98 | 1.08 | 1.08 | 1.10 | 1.11 | 1.01 | 1.01 | 0.90 | 0.91 | 550.50 | 6.51 |
| Q8BLD4   | MCG16669, isoform CRA_f OS=Mus musculus GN=Tardbp PE=2 SV=1 - [Q8BLD4_MOUSE]                      | 26.51 | 4 | 1   | 6   | 11  | 0.98 | 1.22 | 1.24 | 0.96 | 0.97 | 0.97 | 0.98 | 1.10 | 1.12 | 1.14 | 1.16 | 1.10 | 1.12 | 33.57  | 7.06 |
| Q61315-4 | Isoform 4 of Adenomatous polyposis coli protein OS=Mus musculus GN=Apc - [APC_MOUSE]              | 13.69 | 8 | 26  | 27  | 59  | 1.03 | 0.98 | 1.00 | 1.00 | 0.97 | 1.05 | 1.02 | 1.10 | 1.01 | 1.00 | 0.96 | 1.04 | 0.95 | 296.29 | 7.61 |
| Q99N13-2 | Isoform 2 of Histone deacetylase 9 OS=Mus musculus GN=Hdac9 - [HDAC9_MOUSE]                       | 6.99  | 3 | 2   | 2   | 3   | 0.96 | 1.25 | 1.30 | 0.91 | 0.95 | 1.16 | 1.21 | 1.10 | 1.15 | 1.20 | 1.25 | 1.21 | 1.26 | 60.57  | 7.11 |
| Q6IRU2   | Tropomyosin alpha-4 chain OS=Mus musculus GN=Tpm4 PE=2 SV=3 - [TPM4_MOUSE]                        | 55.65 | 1 | 14  | 17  | 96  | 1.04 | 0.81 | 0.79 | 0.90 | 0.92 | 1.14 | 1.10 | 1.10 | 1.06 | 1.02 | 0.99 | 0.93 | 0.92 | 28.45  | 4.68 |



|          |                                                                                                                          |       |    |    |    |     |      |      |      |      |      |      |      |      |      |      |      |      |      |        |      |
|----------|--------------------------------------------------------------------------------------------------------------------------|-------|----|----|----|-----|------|------|------|------|------|------|------|------|------|------|------|------|------|--------|------|
| Q01815-2 | Isoform 2 of Voltage-dependent L-type calcium channel subunit alpha-1C OS=Mus musculus GN=Cacna1c - [CAC1C_MOUSE]        | 6.58  | 10 | 8  | 8  | 24  | 1.14 | 1.15 | 1.09 | 1.04 | 1.01 | 1.08 | 0.93 | 1.10 | 1.12 | 1.09 | 0.99 | 1.04 | 0.92 | 238.79 | 6.93 |
| F7BX42   | Neuronal pentraxin receptor OS=Mus musculus GN=Nptxr PE=2 SV=1 - [F7BX42_MOUSE]                                          | 40.57 | 4  | 14 | 14 | 52  | 1.14 | 1.06 | 0.90 | 0.96 | 0.80 | 1.05 | 0.89 | 1.10 | 0.85 | 1.04 | 0.86 | 1.13 | 0.92 | 52.28  | 6.13 |
| Q924S8   | Sprouty-related, EVH1 domain-containing protein 1 OS=Mus musculus GN=Spred1 PE=1 SV=1 - [SPRE1_MOUSE]                    | 22.75 | 2  | 7  | 8  | 26  | 1.10 | 0.92 | 0.85 | 1.07 | 0.99 | 1.02 | 0.89 | 1.10 | 1.00 | 1.00 | 0.89 | 0.93 | 0.89 | 50.63  | 6.47 |
| Q60805   | Tyrosine-protein kinase Mer OS=Mus musculus GN=Mertk PE=1 SV=1 - [MERTK_MOUSE]                                           | 5.13  | 1  | 3  | 4  | 7   | 1.35 | 0.90 | 0.65 | 1.14 | 0.98 | 1.02 | 0.87 | 1.10 | 0.83 | 0.87 | 0.84 | 1.18 | 0.87 | 110.09 | 5.50 |
| Q91X97   | Neurocalcin-delta OS=Mus musculus GN=Ncald PE=1 SV=4 - [NCALD_MOUSE]                                                     | 74.09 | 4  | 7  | 14 | 320 | 1.18 | 0.92 | 0.78 | 0.97 | 0.83 | 1.14 | 0.95 | 1.10 | 0.87 | 1.01 | 0.84 | 1.09 | 0.93 | 22.23  | 5.35 |
| Q7TMI3-2 | Isoform 3 of E3 ubiquitin-protein ligase UHRF2 OS=Mus musculus GN=Uhrf2 - [UHRF2_MOUSE]                                  | 6.02  | 3  | 1  | 1  | 2   | 0.89 | 1.04 | 1.16 | 1.04 | 1.17 | 1.03 | 1.15 | 1.10 | 1.23 | 1.07 | 1.20 | 1.24 | 1.40 | 24.12  | 7.12 |
| Q8CHS8-2 | Isoform 2 of Vacuolar protein sorting-associated protein 37A OS=Mus musculus GN=Vps37a - [VP37A_MOUSE]                   | 8.96  | 3  | 2  | 2  | 3   | 0.88 | 1.14 | 1.29 | 0.77 | 0.87 | 1.02 | 1.14 | 1.11 | 1.25 | 1.05 | 1.19 | 0.95 | 1.08 | 38.43  | 5.64 |
| Q8BFX1   | E3 ubiquitin-protein ligase RNF187 OS=Mus musculus GN=Rnf187 PE=1 SV=2 - [RN187_MOUSE]                                   | 39.83 | 1  | 6  | 6  | 12  | 0.96 | 0.87 | 0.90 | 0.96 | 0.96 | 1.08 | 1.05 | 1.11 | 1.10 | 0.96 | 0.98 | 0.88 | 0.91 | 26.30  | 5.59 |
| B2RTJ2   | BTB/POZ domain-containing protein KCTD21 OS=Mus musculus GN=Kctd21 PE=2 SV=1 - [B2RTJ2_MOUSE]                            | 6.54  | 2  | 1  | 1  | 4   | 0.96 | 1.00 | 1.04 | 0.94 | 0.98 | 0.92 | 0.96 | 1.11 | 1.15 | 1.06 | 1.11 | 1.04 | 1.08 | 29.64  | 6.79 |
| Q3UHD9-  | Isoform 2 of Arf-GAP with GTPase, ANK repeat and PH domain-containing protein 2 OS=Mus musculus GN=Agap2 - [AGAP2_MOUSE] | 14.58 | 2  | 11 | 11 | 24  | 0.97 | 1.29 | 1.27 | 1.17 | 1.20 | 0.95 | 1.01 | 1.11 | 1.04 | 0.98 | 1.06 | 1.08 | 1.11 | 122.03 | 9.77 |
| Q8K298   | Actin-binding protein anillin OS=Mus musculus GN=Anln PE=1 SV=2 - [ANLN_MOUSE]                                           | 8.30  | 1  | 9  | 9  | 28  | 0.91 | 0.96 | 0.94 | 0.90 | 0.96 | 1.15 | 1.27 | 1.11 | 1.22 | 1.10 | 1.14 | 1.08 | 1.20 | 122.72 | 6.98 |

|          |                                                                                                                            |       |   |    |    |    |      |      |      |      |      |      |      |      |      |      |      |      |      |        |      |
|----------|----------------------------------------------------------------------------------------------------------------------------|-------|---|----|----|----|------|------|------|------|------|------|------|------|------|------|------|------|------|--------|------|
| Q91VN6   | Probable ATP-dependent RNA helicase DDX41<br>OS=Mus musculus<br>GN=Ddx41 PE=1<br>SV=2 -<br>[DDX41_MOUSE]                   | 1.45  | 1 | 1  | 1  | 2  | 0.99 | 0.93 | 0.94 | 0.88 | 0.89 | 1.00 | 1.00 | 1.11 | 1.11 | 1.08 | 1.09 | 1.10 | 1.11 | 69.77  | 6.70 |
| O35126   | Atrophin-1 OS=Mus musculus<br>GN=Atn1 PE=1<br>SV=1 -<br>[ATN1_MOUSE]                                                       | 5.53  | 2 | 3  | 3  | 9  | 0.99 | 0.89 | 0.93 | 0.89 | 1.00 | 1.12 | 1.16 | 1.11 | 1.18 | 1.02 | 0.97 | 0.98 | 1.03 | 123.65 | 8.95 |
| Q8K274   | Ketosamine-3-kinase<br>OS=Mus musculus<br>GN=Fn3krp PE=2<br>SV=2 -<br>[KT3K_MOUSE]                                         | 18.77 | 1 | 5  | 5  | 14 | 1.04 | 1.09 | 1.01 | 1.10 | 1.04 | 1.12 | 1.06 | 1.11 | 1.10 | 1.19 | 1.19 | 1.11 | 1.10 | 34.45  | 7.87 |
| A2AL79   | Aspartyl/asparaginyl beta-hydroxylase<br>OS=Mus musculus<br>GN=Asph PE=2<br>SV=1 -<br>[A2AL79_MOUSE]                       | 14.21 | 8 | 1  | 2  | 7  | 0.83 | 0.76 | 0.91 | 0.89 | 1.07 | 1.13 | 1.35 | 1.11 | 1.32 | 1.14 | 1.37 | 0.88 | 1.06 | 20.71  | 4.39 |
| O88983   | Syntaxin-8 OS=Mus musculus<br>GN=Stx8 PE=1<br>SV=1 -<br>[STX8_MOUSE]                                                       | 17.37 | 1 | 3  | 3  | 6  | 1.21 | 1.18 | 1.17 | 1.14 | 0.96 | 1.34 | 1.09 | 1.11 | 0.90 | 1.15 | 0.95 | 1.14 | 0.95 | 26.91  | 5.01 |
| A9C437   | Chloride channel protein 2 OS=Mus musculus<br>GN=Cln2 PE=2<br>SV=1 -<br>[A9C437_MOUSE]                                     | 2.24  | 2 | 2  | 2  | 2  | 0.98 | 1.35 | 1.38 | 1.18 | 1.21 | 0.99 | 1.01 | 1.11 | 1.13 | 1.00 | 1.02 | 0.91 | 0.93 | 97.64  | 8.56 |
| Q0KL01   | UBX domain-containing protein 2B<br>OS=Mus musculus<br>GN=Ubx2b PE=1<br>SV=2 -<br>[UBX2B_MOUSE]                            | 61.93 | 1 | 13 | 13 | 41 | 1.01 | 0.89 | 0.82 | 0.91 | 0.91 | 1.11 | 1.06 | 1.11 | 1.10 | 1.03 | 1.01 | 1.00 | 0.94 | 37.42  | 5.94 |
| P55200-2 | Isoform 2 of Histone-lysine N-methyltransferase 2A<br>OS=Mus musculus<br>GN=Kmt2a -<br>[KMT2A_MOUSE]                       | 0.45  | 2 | 1  | 1  | 2  | 1.21 | 1.15 | 0.95 | 1.22 | 1.01 | 1.37 | 1.13 | 1.11 | 0.91 | 1.38 | 1.14 | 1.39 | 1.15 | 429.10 | 9.16 |
| A2A4A1   | Dnaj homolog subfamily C member 24<br>OS=Mus musculus<br>GN=Dnaj24 PE=2<br>SV=1 -<br>[A2A4A1_MOUSE]                        | 36.49 | 3 | 5  | 5  | 10 | 1.03 | 0.95 | 0.86 | 0.96 | 0.87 | 1.04 | 1.04 | 1.11 | 1.12 | 1.08 | 1.08 | 0.95 | 0.93 | 16.91  | 4.92 |
| E9PUD6   | Protein Zscan18<br>OS=Mus musculus<br>GN=Zscan18 PE=4<br>SV=1 -<br>[E9PUD6_MOUSE]                                          | 14.09 | 1 | 6  | 6  | 9  | 1.18 | 0.99 | 0.87 | 1.02 | 0.94 | 1.20 | 1.02 | 1.11 | 0.94 | 1.09 | 1.01 | 1.19 | 1.07 | 91.69  | 4.35 |
| Q64012-2 | Isoform 1 of RNA-binding protein Raly<br>OS=Mus musculus<br>GN=Raly -<br>[RALY_MOUSE]                                      | 32.77 | 5 | 6  | 6  | 12 | 0.93 | 0.86 | 0.88 | 1.06 | 1.10 | 1.16 | 1.06 | 1.11 | 1.17 | 1.10 | 1.11 | 1.03 | 1.04 | 31.18  | 9.38 |
| Q8BPP5   | EGF-containing fibulin-like extracellular matrix protein 1<br>OS=Mus musculus<br>GN=Efemp1 PE=2<br>SV=1 -<br>[FBLN3_MOUSE] | 6.49  | 1 | 1  | 1  | 6  | 1.01 | 1.42 | 1.40 | 1.23 | 1.22 | 1.26 | 1.24 | 1.11 | 1.09 | 1.26 | 1.25 | 1.22 | 1.22 | 54.92  | 5.14 |

|          |                                                                                                                           |       |   |    |    |     |      |      |      |      |      |      |      |      |      |      |      |      |      |       |      |
|----------|---------------------------------------------------------------------------------------------------------------------------|-------|---|----|----|-----|------|------|------|------|------|------|------|------|------|------|------|------|------|-------|------|
| P56873   | Sjogren syndrome/scleroderma autoantigen 1 homolog OS=Mus musculus GN=Ssca1 PE=2 SV=1 - [SSA27_MOUSE]                     | 46.23 | 2 | 4  | 4  | 8   | 0.92 | 0.93 | 1.25 | 0.93 | 1.01 | 1.17 | 1.37 | 1.11 | 1.20 | 1.17 | 1.40 | 1.18 | 1.34 | 21.32 | 5.12 |
| Q9DC04   | Isoform 5 of Regulator of G-protein signaling 3 OS=Mus musculus GN=Rgs3 - [RGS3_MOUSE]                                    | 2.99  | 3 | 1  | 1  | 2   | 0.99 | 0.89 | 0.89 | 0.85 | 0.85 | 1.12 | 1.12 | 1.11 | 1.11 | 1.09 | 1.10 | 1.24 | 1.24 | 61.52 | 4.94 |
| P58774-2 | Isoform 2 of Tropomyosin beta chain OS=Mus musculus GN=Tpm2 - [TPM2_MOUSE]                                                | 58.80 | 6 | 3  | 21 | 219 | 1.06 | 0.87 | 0.82 | 0.92 | 0.82 | 0.91 | 0.90 | 1.11 | 1.04 | 1.14 | 1.08 | 0.90 | 0.85 | 32.94 | 4.67 |
| P60824   | Cold-inducible RNA-binding protein OS=Mus musculus GN=Cirbp PE=1 SV=1 - [CIRBP_MOUSE]                                     | 43.60 | 3 | 6  | 6  | 41  | 1.00 | 0.78 | 0.79 | 0.88 | 0.85 | 1.31 | 1.30 | 1.11 | 1.12 | 1.04 | 0.99 | 0.99 | 0.99 | 18.60 | 9.61 |
| A2AWT5   | Nucleolar transcription factor 1 OS=Mus musculus GN=Ubf PE=4 SV=1 - [A2AWT5_MOUSE]                                        | 26.83 | 7 | 20 | 20 | 39  | 1.06 | 0.99 | 0.94 | 1.01 | 0.99 | 1.14 | 1.11 | 1.11 | 1.06 | 1.04 | 0.99 | 1.05 | 0.93 | 89.42 | 5.81 |
| E9QPX3   | NADH dehydrogenase [ubiquinone] iron-sulfur protein 4, mitochondrial OS=Mus musculus GN=Ndufs4 PE=4 SV=1 - [E9QPX3_MOUSE] | 55.43 | 2 | 10 | 10 | 134 | 1.03 | 0.82 | 0.82 | 0.92 | 0.93 | 1.11 | 1.11 | 1.11 | 1.06 | 1.02 | 0.99 | 0.94 | 0.93 | 19.79 | 9.99 |
| Q9CPR7   | Suppressor of IKBKE 1 OS=Mus musculus GN=Site1 PE=2 SV=1 - [SIKE1_MOUSE]                                                  | 51.69 | 2 | 8  | 8  | 23  | 0.95 | 0.73 | 0.82 | 0.90 | 0.93 | 1.15 | 1.20 | 1.11 | 1.14 | 1.02 | 1.07 | 0.96 | 1.01 | 23.51 | 5.38 |
| Q9ER00   | Syntaxin-12 OS=Mus musculus GN=Stx12 PE=1 SV=1 - [STX12_MOUSE]                                                            | 37.96 | 1 | 8  | 8  | 35  | 1.06 | 1.03 | 1.00 | 1.00 | 0.93 | 1.11 | 1.02 | 1.11 | 1.05 | 1.05 | 1.03 | 1.12 | 1.00 | 31.18 | 5.44 |
| Q6KCD5   | Isoform 4 of Nipped-B-like protein OS=Mus musculus GN=Nipbl - [NIPBL_MOUSE]                                               | 6.48  | 3 | 1  | 1  | 4   | 0.95 | 0.96 | 1.01 | 0.86 | 0.91 | 1.07 | 1.13 | 1.11 | 1.17 | 0.92 | 0.98 | 0.90 | 0.95 | 32.72 | 5.77 |
| Q80ZP8   | Armet protein OS=Mus musculus GN=Manf PE=2 SV=1 - [Q80ZP8_MOUSE]                                                          | 55.15 | 7 | 10 | 10 | 62  | 1.04 | 0.72 | 0.68 | 0.94 | 0.93 | 1.12 | 1.08 | 1.11 | 1.08 | 1.05 | 1.03 | 0.92 | 0.90 | 19.00 | 8.13 |
| P70302   | Stromal interaction molecule 1 OS=Mus musculus GN=Stim1 PE=1 SV=2 - [STIM1_MOUSE]                                         | 11.82 | 1 | 6  | 6  | 12  | 1.07 | 0.93 | 0.88 | 1.06 | 1.02 | 0.96 | 0.93 | 1.11 | 1.05 | 1.00 | 0.89 | 1.03 | 0.91 | 77.52 | 6.54 |

|        |                                                                                                                |       |   |    |    |     |      |      |      |      |      |      |      |      |      |      |      |      |      |        |      |
|--------|----------------------------------------------------------------------------------------------------------------|-------|---|----|----|-----|------|------|------|------|------|------|------|------|------|------|------|------|------|--------|------|
| P24668 | Cation-dependent mannose-6-phosphate receptor OS=Mus musculus GN=M6pr PE=1 SV=1 - [MPRD_MOUSE]                 | 23.02 | 1 | 5  | 5  | 14  | 1.08 | 1.16 | 1.08 | 1.17 | 1.06 | 1.01 | 0.94 | 1.11 | 1.02 | 0.98 | 1.01 | 1.12 | 1.07 | 31.15  | 5.39 |
| Q8C4G9 | MCG21623, isoform CRA_b OS=Mus musculus GN=Gpr123 PE=2 SV=1 - [Q8C4G9_MOUSE]                                   | 6.06  | 1 | 2  | 2  | 3   | 1.03 | 1.10 | 1.06 | 1.01 | 0.98 | 1.13 | 1.08 | 1.11 | 1.07 | 1.09 | 1.05 | 1.15 | 1.12 | 63.46  | 7.43 |
| Q80Y14 | Glutaredoxin-related protein 5, mitochondrial OS=Mus musculus GN=Glrx5 PE=2 SV=2 - [GLRX5_MOUSE]               | 29.61 | 1 | 3  | 3  | 26  | 1.00 | 0.93 | 0.91 | 0.96 | 0.90 | 1.11 | 1.06 | 1.11 | 1.14 | 1.00 | 1.01 | 0.97 | 0.98 | 16.28  | 6.55 |
| Q9QYE5 | Protein jagged-2 OS=Mus musculus GN=Jag2 PE=2 SV=2 - [JAG2_MOUSE]                                              | 2.81  | 1 | 2  | 2  | 3   | 1.41 | 0.95 | 0.67 | 1.13 | 0.81 | 1.18 | 0.84 | 1.11 | 0.79 | 1.23 | 0.88 | 1.15 | 0.82 | 134.65 | 5.88 |
| Q9CYN9 | Renin receptor OS=Mus musculus GN=Atp6ap2 PE=2 SV=2 - [RENR_MOUSE]                                             | 13.43 | 1 | 3  | 3  | 6   | 0.98 | 1.43 | 1.29 | 1.28 | 1.40 | 1.04 | 1.10 | 1.11 | 1.13 | 1.06 | 1.16 | 1.24 | 1.27 | 39.07  | 5.54 |
| O70176 | Pituitary adenylate cyclase-activating polypeptide OS=Mus musculus GN=Adeyap1 PE=2 SV=1 - [PACA_MOUSE]         | 13.14 | 1 | 2  | 2  | 7   | 1.97 | 1.37 | 0.75 | 0.94 | 0.49 | 1.31 | 0.66 | 1.11 | 0.60 | 2.06 | 1.04 | 2.06 | 1.04 | 19.37  | 9.23 |
| Q8C845 | EF-hand domain-containing protein D2 OS=Mus musculus GN=Efhd2 PE=2 SV=1 - [Q8C845_MOUSE]                       | 60.00 | 2 | 15 | 18 | 149 | 1.05 | 1.02 | 0.99 | 0.93 | 0.89 | 1.02 | 0.99 | 1.11 | 1.03 | 0.92 | 0.88 | 0.90 | 0.88 | 26.78  | 5.14 |
| Q9WTR5 | Cadherin-13 OS=Mus musculus GN=Cdh13 PE=1 SV=2 - [CAD13_MOUSE]                                                 | 24.93 | 1 | 15 | 15 | 71  | 1.13 | 1.02 | 0.89 | 0.96 | 0.83 | 1.17 | 1.02 | 1.11 | 0.93 | 1.12 | 1.01 | 1.27 | 1.04 | 78.14  | 5.12 |
| E9Q2N1 | Bromodomain and WD repeat-containing protein 1 (Fragment) OS=Mus musculus GN=Brawd1 PE=2 SV=1 - [E9Q2N1_MOUSE] | 2.31  | 4 | 3  | 3  | 5   | 1.07 | 0.95 | 0.87 | 0.88 | 0.83 | 1.01 | 0.94 | 1.11 | 1.06 | 1.01 | 0.95 | 1.03 | 0.96 | 294.50 | 8.28 |
| Q3UDE2 | Tubulin-tyrosine ligase-like protein 12 OS=Mus musculus GN=Ttl12 PE=1 SV=1 - [TTL12_MOUSE]                     | 4.23  | 1 | 2  | 2  | 4   | 1.10 | 1.16 | 1.16 | 1.11 | 1.31 | 0.89 | 1.06 | 1.11 | 1.11 | 1.24 | 1.13 | 1.15 | 1.20 | 74.00  | 5.63 |
| D3Z3F8 | Spartin OS=Mus musculus GN=Spg20 PE=2 SV=1 - [D3Z3F8_MOUSE]                                                    | 9.79  | 5 | 4  | 4  | 10  | 1.27 | 0.97 | 0.77 | 1.05 | 0.85 | 1.35 | 1.19 | 1.11 | 0.86 | 1.09 | 0.91 | 1.20 | 0.98 | 63.04  | 5.58 |

|          |                                                                                                           |       |    |    |    |     |      |      |      |      |      |      |      |      |      |      |      |      |      |       |      |
|----------|-----------------------------------------------------------------------------------------------------------|-------|----|----|----|-----|------|------|------|------|------|------|------|------|------|------|------|------|------|-------|------|
| Q8BJM3   | R3H and coiled-coil domain-containing protein 1-like OS=Mus musculus GN=R3hcc11 PE=2 SV=1 - [R3HCL_MOUSE] | 5.81  | 2  | 3  | 3  | 4   | 0.98 | 1.15 | 1.11 | 0.92 | 0.97 | 1.04 | 1.20 | 1.11 | 1.21 | 1.18 | 1.25 | 0.92 | 0.94 | 84.43 | 4.87 |
| Q8C5P7   | Testis development-related protein OS=Mus musculus GN=Tdrp PE=2 SV=1 - [TDRP_MOUSE]                       | 58.79 | 3  | 8  | 8  | 24  | 1.07 | 1.01 | 0.95 | 0.89 | 0.87 | 1.12 | 1.11 | 1.11 | 1.08 | 1.15 | 1.07 | 1.10 | 1.13 | 20.17 | 5.73 |
| Q8BI72   | CDKN2A-interacting protein OS=Mus musculus GN=Cdkn2aip PE=2 SV=1 - [CARF_MOUSE]                           | 3.55  | 1  | 1  | 1  | 2   | 1.05 | 1.23 | 1.18 | 0.81 | 0.77 | 1.00 | 0.95 | 1.11 | 1.05 | 0.91 | 0.87 | 1.20 | 1.15 | 59.71 | 9.16 |
| P57722-2 | Isoform 2 of Poly(rC)-binding protein 3 OS=Mus musculus GN=Pcbp3 - [PCBP3_MOUSE]                          | 34.86 | 5  | 4  | 9  | 35  | 1.01 | 1.11 | 0.99 | 0.96 | 1.00 | 1.02 | 1.11 | 1.11 | 1.14 | 0.88 | 1.10 | 1.10 | 1.14 | 39.14 | 7.52 |
| Q99KR7   | Peptidyl-prolyl cis-trans isomerase F, mitochondrial OS=Mus musculus GN=Ppif PE=1 SV=1 - [PPIF_MOUSE]     | 53.40 | 1  | 6  | 8  | 29  | 0.99 | 0.89 | 0.87 | 0.86 | 0.88 | 1.08 | 1.06 | 1.11 | 1.15 | 0.98 | 1.05 | 0.93 | 0.93 | 21.72 | 9.16 |
| Q8CGA4   | UPF0452 protein C7orf41 homolog OS=Mus musculus PE=2 SV=1 - [CG041_MOUSE]                                 | 19.08 | 1  | 2  | 2  | 8   | 1.03 | 1.11 | 1.22 | 0.92 | 1.00 | 0.97 | 0.92 | 1.11 | 1.07 | 1.00 | 1.04 | 1.13 | 1.12 | 14.83 | 4.17 |
| Q9Z0P4   | Paralemin-1 OS=Mus musculus GN=Palm PE=1 SV=1 - [PALM_MOUSE]                                              | 71.80 | 1  | 5  | 28 | 304 | 0.96 | 1.09 | 1.02 | 0.87 | 0.95 | 1.12 | 1.16 | 1.11 | 1.18 | 1.02 | 1.08 | 0.95 | 1.03 | 41.59 | 4.84 |
| Q9DBX2   | Phosducin-like protein OS=Mus musculus GN=Pdcl PE=1 SV=1 - [PHLP_MOUSE]                                   | 16.61 | 2  | 3  | 3  | 3   | 1.02 | 1.04 | 1.04 | 0.91 | 0.88 | 1.14 | 1.14 | 1.11 | 1.09 | 1.07 | 1.05 | 1.13 | 1.11 | 34.38 | 4.87 |
| Q9QZS3   | Isoform 4 of Protein numb homolog OS=Mus musculus GN=Numb - [NUMB_MOUSE]                                  | 24.28 | 10 | 10 | 12 | 44  | 0.96 | 0.97 | 1.04 | 0.90 | 0.94 | 1.06 | 1.13 | 1.11 | 1.15 | 1.01 | 1.04 | 0.94 | 0.98 | 64.35 | 8.47 |
| B2RVL6   | Zinc finger CCHC domain-containing protein 24 OS=Mus musculus GN=Zchc24 PE=2 SV=1 - [ZCH24_MOUSE]         | 11.20 | 1  | 2  | 2  | 3   | 1.03 | 0.98 | 0.95 | 0.99 | 0.97 | 1.01 | 0.98 | 1.11 | 1.08 | 1.12 | 1.09 | 1.04 | 1.01 | 26.94 | 8.70 |
| Q80X80   | C2 domain-containing protein 2-like OS=Mus musculus GN=C2cd2l PE=1 SV=3 - [C2C2L_MOUSE]                   | 24.50 | 1  | 10 | 10 | 26  | 1.03 | 1.00 | 0.96 | 1.21 | 1.15 | 1.20 | 1.14 | 1.11 | 1.03 | 1.22 | 1.18 | 1.16 | 1.15 | 76.28 | 7.21 |
| Q9JK53   | Prolargin OS=Mus musculus GN=Prelp PE=2 SV=2 - [PRELP_MOUSE]                                              | 6.88  | 1  | 2  | 2  | 3   | 1.09 | 0.93 | 0.77 | 0.91 | 0.84 | 0.65 | 0.60 | 1.11 | 0.91 | 0.81 | 0.75 | 0.97 | 0.89 | 43.27 | 9.54 |

|          |                                                                                                              |       |    |    |    |     |      |      |      |      |      |      |      |      |      |      |      |      |      |        |       |
|----------|--------------------------------------------------------------------------------------------------------------|-------|----|----|----|-----|------|------|------|------|------|------|------|------|------|------|------|------|------|--------|-------|
| Q504N4   | Deoxyguanosine kinase, isoform CRA_c OS=Mus musculus GN=Dguok PE=2 SV=1 - [Q504N4_MOUSE]                     | 10.59 | 3  | 1  | 1  | 2   | 1.47 | 1.25 | 0.85 | 1.21 | 0.82 | 1.25 | 0.85 | 1.11 | 0.75 | 1.11 | 0.76 | 1.56 | 1.06 | 27.54  | 9.16  |
| Q6PER3   | Microtubule-associated protein RP/EB family member 3 OS=Mus musculus GN=Mapre3 PE=1 SV=1 - [MARE3_MOUSE]     | 37.72 | 2  | 1  | 10 | 54  | 0.97 | 0.87 | 0.87 | 1.02 | 1.08 | 1.01 | 1.09 | 1.11 | 1.20 | 0.97 | 1.01 | 0.96 | 1.08 | 31.95  | 5.54  |
| Q6ZQ18-2 | Isoform 2 of Protein EFR3 homolog B OS=Mus musculus GN=Efr3b - [EFR3B_MOUSE]                                 | 9.70  | 3  | 5  | 6  | 15  | 0.87 | 1.13 | 1.28 | 1.07 | 1.22 | 1.09 | 1.23 | 1.11 | 1.19 | 1.05 | 1.20 | 1.24 | 1.39 | 87.46  | 6.68  |
| E9Q160   | Protein Tro OS=Mus musculus GN=Tro PE=2 SV=1 - [E9Q160_MOUSE]                                                | 2.62  | 6  | 1  | 2  | 4   | 1.00 | 0.84 | 0.84 | 0.96 | 0.95 | 1.07 | 1.07 | 1.11 | 1.10 | 1.04 | 1.04 | 0.98 | 0.98 | 87.26  | 10.10 |
| Q9JLR1   | Protein transport protein Sec61 subunit alpha isoform 2 OS=Mus musculus GN=Sec61a2 PE=2 SV=3 - [S61A2_MOUSE] | 5.67  | 2  | 1  | 2  | 2   | 1.31 | 2.66 | 2.03 | 1.44 | 1.10 | 0.69 | 0.53 | 1.11 | 0.85 | 1.04 | 0.80 | 0.66 | 0.51 | 52.21  | 8.06  |
| E9QQ33   | E3 ubiquitin-protein ligase SH3RF1 OS=Mus musculus GN=Sh3rf1 PE=4 SV=1 - [E9QQ33_MOUSE]                      | 11.67 | 6  | 4  | 6  | 8   | 1.15 | 1.09 | 1.04 | 0.98 | 1.00 | 1.17 | 1.15 | 1.11 | 1.08 | 1.19 | 1.07 | 1.09 | 1.05 | 93.29  | 8.48  |
| O35633-2 | Isoform 2 of Vesicular inhibitory amino acid transporter OS=Mus musculus GN=Slc32a1 - [V1AAT_MOUSE]          | 23.03 | 2  | 6  | 7  | 114 | 1.13 | 1.07 | 1.02 | 1.00 | 0.89 | 1.12 | 0.97 | 1.11 | 0.97 | 1.15 | 1.04 | 1.13 | 0.98 | 56.81  | 6.90  |
| Q9CPQ1   | Cytochrome c oxidase subunit 6C OS=Mus musculus GN=Cox6c PE=1 SV=3 - [COX6C_MOUSE]                           | 50.00 | 2  | 4  | 4  | 14  | 1.02 | 1.13 | 1.15 | 1.03 | 1.08 | 1.29 | 1.10 | 1.11 | 1.06 | 1.17 | 1.06 | 1.09 | 1.11 | 8.46   | 10.14 |
| Q6NSW3   | Isoform 4 of A-kinase anchor protein SPHKAP OS=Mus musculus GN=Sphkap - [SPKAP_MOUSE]                        | 4.67  | 5  | 6  | 6  | 10  | 1.04 | 1.06 | 1.04 | 1.02 | 0.97 | 1.06 | 0.96 | 1.11 | 1.06 | 1.07 | 0.98 | 1.13 | 1.12 | 173.24 | 5.08  |
| Q9D0J8   | Parathymosin OS=Mus musculus GN=Ptms PE=2 SV=3 - [PTMS_MOUSE]                                                | 23.76 | 1  | 3  | 3  | 186 | 0.99 | 0.80 | 0.81 | 0.92 | 0.94 | 1.14 | 1.14 | 1.11 | 1.12 | 1.00 | 1.02 | 0.92 | 0.95 | 11.42  | 4.22  |
| E9QNR5   | Thrombospondin type-1 domain-containing protein 7A OS=Mus musculus GN=Thsd7a PE=2 SV=1 - [E9QNR5_MOUSE]      | 10.64 | 6  | 13 | 13 | 24  | 1.02 | 1.02 | 1.02 | 1.07 | 1.04 | 1.07 | 1.09 | 1.11 | 1.09 | 1.08 | 1.09 | 1.14 | 1.21 | 183.33 | 7.20  |
| Q8CBW3   | Isoform 5 of Abl interactor 1 OS=Mus musculus GN=Abi1 - [ABI1_MOUSE]                                         | 42.01 | 11 | 12 | 16 | 69  | 0.97 | 0.84 | 0.84 | 0.95 | 0.97 | 1.10 | 1.13 | 1.11 | 1.17 | 1.05 | 1.06 | 0.97 | 1.00 | 42.52  | 6.20  |

|          |                                                                                                                                  |       |   |    |    |     |      |      |      |      |      |      |      |      |      |      |      |      |      |        |       |
|----------|----------------------------------------------------------------------------------------------------------------------------------|-------|---|----|----|-----|------|------|------|------|------|------|------|------|------|------|------|------|------|--------|-------|
| P70182-2 | Isoform 2 of Phosphatidylinositol 4-phosphate 5-kinase type-1 alpha OS=Mus musculus GN=Pip5k1a - [P151A_MOUSE]                   | 11.08 | 7 | 2  | 3  | 18  | 1.02 | 1.09 | 1.07 | 0.98 | 0.96 | 1.12 | 1.37 | 1.11 | 1.09 | 1.05 | 1.03 | 1.01 | 1.00 | 38.00  | 8.47  |
| Q69Z57   | HBS1-like protein OS=Mus musculus GN=Hbs11 PE=1 SV=2 - [HBS1L_MOUSE]                                                             | 18.62 | 4 | 4  | 9  | 21  | 1.19 | 1.25 | 1.27 | 1.19 | 0.96 | 1.09 | 0.84 | 1.11 | 0.87 | 1.14 | 0.83 | 1.24 | 1.17 | 75.05  | 6.46  |
| Q9R099   | Transducin beta-like protein 2 OS=Mus musculus GN=Tbl2 PE=2 SV=2 - [TBL2_MOUSE]                                                  | 14.71 | 3 | 4  | 4  | 8   | 1.05 | 1.15 | 1.12 | 1.04 | 1.05 | 1.01 | 0.93 | 1.11 | 0.90 | 1.12 | 0.93 | 1.15 | 0.96 | 49.55  | 9.04  |
| Q9D842-2 | Isoform 2 of Aprataxin and PNK-like factor OS=Mus musculus GN=Aplf - [APLF_MOUSE]                                                | 7.67  | 3 | 1  | 1  | 5   | 0.96 | 0.82 | 0.86 | 0.80 | 0.91 | 1.07 | 1.15 | 1.11 | 1.13 | 1.10 | 1.11 | 1.03 | 1.08 | 43.02  | 5.07  |
| D3Z7P2   | Transmembrane protein 109 (Fragment) OS=Mus musculus GN=Tmem109 PE=2 SV=1 - [D3Z7P2_MOUSE]                                       | 12.33 | 5 | 1  | 1  | 2   | 1.04 | 2.31 | 2.22 | 1.10 | 1.06 | 1.30 | 1.24 | 1.11 | 1.06 | 1.24 | 1.20 | 1.11 | 1.07 | 8.02   | 8.70  |
| Q8QZT1   | Acetyl-CoA acetyltransferase, mitochondrial OS=Mus musculus GN=Acat1 PE=1 SV=1 - [THIL_MOUSE]                                    | 38.92 | 1 | 13 | 13 | 107 | 0.96 | 0.97 | 1.00 | 0.99 | 1.05 | 1.09 | 1.14 | 1.11 | 1.17 | 1.08 | 1.16 | 1.10 | 1.17 | 44.79  | 8.51  |
| Q9EQH4-  | Isoform 2 of Transcription initiation factor TFIIID subunit 8 OS=Mus musculus GN=Taf8 - [TAF8_MOUSE]                             | 8.52  | 5 | 2  | 2  | 4   | 0.91 | 0.92 | 1.01 | 0.82 | 0.90 | 1.07 | 1.17 | 1.11 | 1.22 | 0.91 | 1.01 | 1.03 | 1.13 | 33.68  | 6.46  |
| G5E8J9   | SCY1-like protein 2 OS=Mus musculus GN=Scyl2 PE=2 SV=1 - [G5E8J9_MOUSE]                                                          | 7.21  | 4 | 4  | 4  | 6   | 1.01 | 0.80 | 0.80 | 1.07 | 1.02 | 1.06 | 1.10 | 1.11 | 1.02 | 1.05 | 1.02 | 0.98 | 0.98 | 103.12 | 8.02  |
| Q9WU01   | KH domain-containing, RNA-binding, signal transduction-associated protein 2 OS=Mus musculus GN=Khdrbs2 PE=1 SV=1 - [KHDR2_MOUSE] | 15.47 | 2 | 4  | 6  | 19  | 1.04 | 0.79 | 0.73 | 0.96 | 0.92 | 1.20 | 1.15 | 1.11 | 1.11 | 1.15 | 1.10 | 0.97 | 0.94 | 38.84  | 6.48  |
| A2API8   | A-kinase anchor protein 2 OS=Mus musculus GN=Akap2 PE=2 SV=1 - [A2API8_MOUSE]                                                    | 33.77 | 6 | 1  | 23 | 103 | 0.94 | 1.03 | 1.09 | 0.93 | 0.99 | 1.03 | 1.08 | 1.11 | 1.18 | 1.06 | 1.13 | 1.02 | 1.08 | 101.54 | 5.20  |
| Q9D735   | Uncharacterized protein C19orf43 homolog OS=Mus musculus PE=2 SV=1 - [CS043_MOUSE]                                               | 23.12 | 1 | 3  | 3  | 3   | 1.10 | 0.94 | 0.72 | 0.88 | 0.92 | 0.90 | 1.16 | 1.11 | 1.37 | 0.95 | 1.10 | 0.76 | 0.75 | 18.37  | 9.67  |
| Q9CQ69   | Cytochrome b-c1 complex subunit 8 OS=Mus musculus GN=Uqcrcq PE=1 SV=3 - [QCR8_MOUSE]                                             | 46.34 | 2 | 4  | 4  | 19  | 0.97 | 1.03 | 1.01 | 1.05 | 1.12 | 1.06 | 1.16 | 1.11 | 1.10 | 1.12 | 1.14 | 1.01 | 1.02 | 9.76   | 10.26 |

|        |                                                                                                                     |       |    |    |    |     |      |      |      |      |      |      |      |      |      |      |      |      |      |        |       |
|--------|---------------------------------------------------------------------------------------------------------------------|-------|----|----|----|-----|------|------|------|------|------|------|------|------|------|------|------|------|------|--------|-------|
| Q91Z50 | Flap endonuclease 1<br>OS=Mus musculus<br>GN=Fen1 PE=2 SV=1 -<br>[Q91Z50_MOUSE]                                     | 11.32 | 2  | 3  | 3  | 4   | 1.01 | 0.94 | 1.05 | 0.88 | 0.88 | 1.31 | 1.29 | 1.11 | 1.31 | 1.12 | 1.15 | 1.11 | 1.13 | 42.60  | 8.34  |
| E9PVS1 | Inter-alpha-trypsin<br>inhibitor heavy chain<br>H3 OS=Mus musculus<br>GN=Itih3 PE=2 SV=1 -<br>[E9PVS1_MOUSE]        | 2.29  | 2  | 1  | 1  | 2   | 2.16 | 0.82 | 0.38 | 1.04 | 0.48 | 0.94 | 0.44 | 1.11 | 0.51 | 1.74 | 0.81 | 1.22 | 0.57 | 77.97  | 6.84  |
| Q6PGJ3 | L1 cell adhesion<br>molecule OS=Mus<br>musculus GN=L1cam<br>PE=2 SV=1 -<br>[Q6PGJ3_MOUSE]                           | 36.06 | 7  | 34 | 34 | 229 | 1.07 | 0.90 | 0.91 | 0.98 | 0.92 | 1.15 | 1.07 | 1.11 | 1.04 | 1.12 | 1.04 | 1.05 | 1.01 | 140.83 | 5.96  |
| Q91VM9 | Inorganic<br>pyrophosphatase 2,<br>mitochondrial OS=Mus<br>musculus GN=Ppa2<br>PE=2 SV=1 -<br>[IPYR2_MOUSE]         | 60.91 | 5  | 16 | 16 | 65  | 0.87 | 0.88 | 1.01 | 0.87 | 0.99 | 0.99 | 1.20 | 1.11 | 1.26 | 1.00 | 1.10 | 0.93 | 1.11 | 38.09  | 6.98  |
| Q8BJZ4 | 28S ribosomal protein<br>S35, mitochondrial<br>OS=Mus musculus<br>GN=Mrps35 PE=2<br>SV=2 -<br>[RT35_MOUSE]          | 20.94 | 1  | 4  | 4  | 9   | 0.76 | 0.77 | 0.80 | 0.98 | 1.17 | 1.00 | 1.06 | 1.11 | 1.22 | 1.01 | 1.16 | 1.08 | 1.17 | 35.95  | 8.59  |
| Q9CYH6 | Ribosome biogenesis<br>regulatory protein<br>homolog OS=Mus<br>musculus GN=Rrs1<br>PE=2 SV=1 -<br>[RRS1_MOUSE]      | 5.48  | 1  | 2  | 2  | 3   | 1.21 | 1.12 | 0.92 | 1.20 | 0.99 | 1.24 | 1.02 | 1.11 | 0.92 | 1.25 | 1.04 | 1.33 | 1.10 | 41.53  | 10.77 |
| Q99P72 | Reticulon-4 OS=Mus<br>musculus GN=Rtn4<br>PE=1 SV=2 -<br>[RTN4_MOUSE]                                               | 57.23 | 5  | 44 | 44 | 359 | 1.00 | 0.91 | 0.96 | 0.97 | 0.97 | 1.11 | 1.09 | 1.11 | 1.08 | 1.08 | 1.07 | 1.01 | 1.02 | 126.54 | 4.54  |
| O54916 | RalBP1-associated Eps<br>domain-containing<br>protein 1 OS=Mus<br>musculus GN=Reps1<br>PE=1 SV=2 -<br>[REPS1_MOUSE] | 14.97 | 10 | 7  | 8  | 16  | 1.00 | 1.08 | 1.11 | 0.96 | 0.99 | 1.02 | 0.97 | 1.11 | 1.11 | 1.06 | 1.03 | 1.12 | 1.06 | 86.47  | 5.58  |
| Q3UPL5 | Uncharacterized<br>protein C11orf96<br>homolog OS=Mus<br>musculus GN=Ag2<br>PE=1 SV=2 -<br>[CK096_MOUSE]            | 13.65 | 1  | 2  | 2  | 5   | 0.93 | 0.94 | 1.00 | 0.95 | 1.02 | 1.06 | 1.02 | 1.11 | 1.19 | 1.00 | 1.22 | 1.02 | 1.09 | 27.06  | 10.89 |
| Q9DC33 | High mobility group<br>protein 20A OS=Mus<br>musculus<br>GN=Hmg20a PE=2<br>SV=1 -<br>[HM20A_MOUSE]                  | 19.94 | 3  | 5  | 5  | 15  | 1.11 | 1.13 | 0.99 | 1.03 | 0.91 | 0.99 | 0.88 | 1.11 | 0.93 | 1.02 | 0.99 | 1.09 | 0.98 | 39.89  | 6.40  |
| Q9D168 | Integrator complex<br>subunit 12 OS=Mus<br>musculus GN=Ints12<br>PE=1 SV=1 -<br>[INT12_MOUSE]                       | 19.74 | 1  | 6  | 6  | 11  | 1.00 | 0.78 | 0.76 | 0.92 | 0.91 | 1.11 | 1.10 | 1.11 | 1.09 | 0.99 | 0.98 | 0.97 | 1.02 | 48.54  | 9.69  |
| Q9D1B9 | 39S ribosomal protein<br>L28, mitochondrial<br>OS=Mus musculus<br>GN=Mrpl28 PE=2<br>SV=3 -<br>[RM28_MOUSE]          | 6.23  | 1  | 2  | 2  | 3   | 0.92 | 1.45 | 1.56 | 1.16 | 1.25 | 1.12 | 1.20 | 1.11 | 1.20 | 0.99 | 1.07 | 0.85 | 0.92 | 30.15  | 9.29  |



|        |                                                                                                  |       |    |    |    |     |      |      |      |      |      |      |      |      |      |      |      |      |      |        |       |
|--------|--------------------------------------------------------------------------------------------------|-------|----|----|----|-----|------|------|------|------|------|------|------|------|------|------|------|------|------|--------|-------|
| P10711 | Transcription elongation factor A protein 1 OS=Mus musculus GN=Tcea1 PE=1 SV=2 - [TCEA1_MOUSE]   | 56.81 | 6  | 16 | 16 | 54  | 1.02 | 0.91 | 0.90 | 0.95 | 0.90 | 1.13 | 1.10 | 1.11 | 1.12 | 1.06 | 1.02 | 1.00 | 0.96 | 33.86  | 8.38  |
| Q9DCT8 | Cysteine-rich protein 2 OS=Mus musculus GN=Crip2 PE=1 SV=1 - [CRIP2_MOUSE]                       | 68.75 | 1  | 9  | 9  | 148 | 1.03 | 0.84 | 0.80 | 0.96 | 0.95 | 1.12 | 1.10 | 1.11 | 1.06 | 1.01 | 1.01 | 0.93 | 0.93 | 22.71  | 8.63  |
| A2AWT3 | Ataxin-7-like protein 3 OS=Mus musculus GN=Atxn7l3 PE=2 SV=1 - [AT7L3_MOUSE]                     | 2.02  | 2  | 1  | 1  | 3   | 1.08 | 0.76 | 0.70 | 1.04 | 0.97 | 1.18 | 1.09 | 1.11 | 1.03 | 1.07 | 1.00 | 1.03 | 0.96 | 38.57  | 7.03  |
| Q9CX86 | Heterogeneous nuclear ribonucleoprotein A0 OS=Mus musculus GN=Hnrpa0 PE=1 SV=1 - [ROA0_MOUSE]    | 36.72 | 1  | 6  | 8  | 30  | 0.83 | 0.77 | 0.92 | 0.86 | 1.03 | 1.01 | 1.27 | 1.11 | 1.33 | 0.93 | 1.17 | 0.94 | 1.20 | 30.51  | 9.31  |
| Q8BUE5 | Alpha-1D adrenergic receptor OS=Mus musculus GN=Adra1a PE=2 SV=1 - [Q8BUE5_MOUSE]                | 2.58  | 2  | 1  | 1  | 2   | 1.00 | 1.47 | 1.46 | 1.03 | 1.03 | 0.99 | 0.98 | 1.11 | 1.10 | 1.16 | 1.15 | 1.32 | 1.32 | 47.48  | 9.36  |
| E9Q2D0 | WAS/WASL-interacting protein family member 3 OS=Mus musculus GN=Wipf3 PE=4 SV=1 - [E9Q2D0_MOUSE] | 58.39 | 2  | 2  | 18 | 103 | 1.07 | 0.91 | 0.80 | 0.92 | 0.80 | 1.16 | 1.09 | 1.11 | 1.02 | 1.03 | 0.96 | 1.01 | 0.95 | 49.23  | 10.18 |
| Q8BIQ5 | Cleavage stimulation factor subunit 2 OS=Mus musculus GN=Cstf2 PE=1 SV=2 - [CSTF2_MOUSE]         | 31.21 | 4  | 3  | 12 | 35  | 1.17 | 1.04 | 0.90 | 0.95 | 0.70 | 1.15 | 0.98 | 1.11 | 0.82 | 0.92 | 0.79 | 0.95 | 0.74 | 61.30  | 6.83  |
| P28184 | Metallothionein-3 OS=Mus musculus GN=Mt3 PE=1 SV=1 - [MT3_MOUSE]                                 | 41.18 | 1  | 3  | 3  | 19  | 1.14 | 0.71 | 0.78 | 0.86 | 0.85 | 0.93 | 0.91 | 1.11 | 0.88 | 0.93 | 0.86 | 0.70 | 0.80 | 7.00   | 7.47  |
| D3Z719 | Protein SMG9 (Fragment) OS=Mus musculus GN=Smg9 PE=2 SV=1 - [D3Z719_MOUSE]                       | 12.38 | 3  | 2  | 2  | 5   | 0.96 | 0.70 | 0.73 | 0.88 | 0.91 | 1.19 | 1.23 | 1.11 | 1.15 | 1.01 | 1.06 | 0.95 | 0.96 | 22.54  | 8.10  |
| P08228 | Superoxide dismutase [Cu-Zn] OS=Mus musculus GN=Sod1 PE=1 SV=2 - [SODC_MOUSE]                    | 59.09 | 1  | 11 | 11 | 404 | 1.06 | 0.95 | 0.90 | 0.94 | 0.87 | 1.15 | 1.07 | 1.11 | 1.06 | 1.08 | 1.03 | 1.03 | 0.99 | 15.93  | 6.51  |
| Q8C419 | Probable G-protein coupled receptor 158 OS=Mus musculus GN=Gpr158 PE=1 SV=2 - [GP158_MOUSE]      | 31.75 | 1  | 27 | 27 | 142 | 0.94 | 0.92 | 0.99 | 0.94 | 0.98 | 1.14 | 1.19 | 1.11 | 1.14 | 1.09 | 1.12 | 1.00 | 1.02 | 134.34 | 8.09  |
| Q9Z0R4 | Intersectin-1 OS=Mus musculus GN=Itsn1 PE=1 SV=2 - [ITSN1_MOUSE]                                 | 24.27 | 11 | 1  | 35 | 85  | 1.18 | 1.13 | 0.96 | 1.06 | 0.90 | 1.14 | 0.95 | 1.11 | 0.94 | 0.93 | 0.79 | 0.98 | 0.83 | 194.18 | 7.91  |

|        |                                                                                                          |       |   |    |    |     |      |      |      |      |      |      |      |      |      |      |      |      |      |        |      |
|--------|----------------------------------------------------------------------------------------------------------|-------|---|----|----|-----|------|------|------|------|------|------|------|------|------|------|------|------|------|--------|------|
| P42567 | Epidermal growth factor receptor substrate 15 OS=Mus musculus GN=Eps15 PE=1 SV=1 - [EPS15_MOUSE]         | 33.00 | 7 | 18 | 18 | 39  | 1.02 | 0.97 | 0.98 | 0.99 | 1.03 | 1.04 | 1.09 | 1.11 | 1.16 | 1.04 | 1.09 | 1.06 | 1.02 | 98.41  | 4.60 |
| P57774 | Pro-neuropeptide Y OS=Mus musculus GN=Npy PE=2 SV=2 - [NPY_MOUSE]                                        | 29.90 | 1 | 2  | 2  | 2   | 1.27 | 0.96 | 0.75 | 0.90 | 0.71 | 1.24 | 0.97 | 1.11 | 0.88 | 0.98 | 0.78 | 1.02 | 0.80 | 10.87  | 7.12 |
| P16627 | Heat shock 70 kDa protein 1-like OS=Mus musculus GN=Hspa11 PE=2 SV=4 - [HS71L_MOUSE]                     | 26.21 | 1 | 1  | 15 | 260 | 1.02 | 0.80 | 0.78 | 0.83 | 0.81 | 1.10 | 1.07 | 1.11 | 1.09 | 1.02 | 1.00 | 1.01 | 1.00 | 70.59  | 6.24 |
| Q60864 | Stress-induced-phosphoprotein 1 OS=Mus musculus GN=Stip1 PE=1 SV=1 [STIP1_MOUSE]                         | 70.17 | 1 | 45 | 45 | 566 | 1.09 | 0.81 | 0.76 | 0.95 | 0.88 | 1.13 | 1.04 | 1.11 | 1.03 | 1.04 | 0.98 | 0.95 | 0.91 | 62.54  | 6.80 |
| Q5NCU4 | SPARC OS=Mus musculus GN=Sparc PE=2 SV=1 - [Q5NCU4_MOUSE]                                                | 18.27 | 3 | 5  | 5  | 7   | 1.39 | 0.99 | 0.73 | 0.98 | 0.71 | 1.15 | 0.81 | 1.11 | 0.78 | 1.32 | 0.96 | 1.28 | 0.97 | 34.30  | 4.86 |
| F6UK66 | Coiled-coil domain-containing protein 50 (Fragment) OS=Mus musculus GN=Ccdc50 PE=4 SV=1 - [F6UK66_MOUSE] | 32.42 | 4 | 5  | 5  | 22  | 1.05 | 1.00 | 1.02 | 0.92 | 0.87 | 1.21 | 1.15 | 1.11 | 1.06 | 1.07 | 1.02 | 0.97 | 1.01 | 29.78  | 6.67 |
| O70139 | cAMP-dependent protein kinase inhibitor gamma OS=Mus musculus GN=Pkg PE=2 SV=1 - [IPKG_MOUSE]            | 72.37 | 3 | 2  | 2  | 11  | 1.08 | 1.10 | 1.15 | 1.05 | 1.05 | 1.17 | 1.19 | 1.11 | 1.02 | 1.05 | 0.97 | 1.22 | 1.21 | 7.94   | 4.21 |
| F6R8S6 | Proline-rich AKT1 substrate 1 (Fragment) OS=Mus musculus GN=Akt1s1 PE=4 SV=1 - [F6R8S6_MOUSE]            | 33.47 | 4 | 1  | 4  | 29  | 0.98 | 0.85 | 0.86 | 0.86 | 0.88 | 1.26 | 1.27 | 1.11 | 1.13 | 0.91 | 0.93 | 1.01 | 1.03 | 26.45  | 4.58 |
| Q923F1 | Chloride channel, nucleotide-sensitive, 1A OS=Mus musculus GN=Clns1a PE=2 SV=1 - [Q923F1_MOUSE]          | 52.28 | 1 | 2  | 8  | 62  | 0.81 | 0.92 | 1.39 | 0.84 | 1.03 | 1.10 | 1.31 | 1.11 | 1.35 | 1.14 | 1.44 | 0.84 | 1.06 | 26.51  | 4.12 |
| E9Q6Y8 | Ubiquitin carboxyl-terminal hydrolase OS=Mus musculus GN=Usp31 PE=2 SV=1 - [E9Q6Y8_MOUSE]                | 10.49 | 1 | 9  | 9  | 16  | 1.03 | 1.02 | 1.06 | 1.06 | 0.95 | 1.07 | 1.02 | 1.11 | 1.00 | 1.18 | 1.10 | 1.16 | 1.09 | 146.23 | 9.17 |
| A2AGS0 | MAP7 domain-containing protein 2 OS=Mus musculus GN=Map7d2 PE=1 SV=1 - [MA7D2_MOUSE]                     | 43.92 | 6 | 26 | 31 | 92  | 1.06 | 0.76 | 0.74 | 0.87 | 0.86 | 1.14 | 1.09 | 1.11 | 1.02 | 1.03 | 0.94 | 0.92 | 0.86 | 86.00  | 8.81 |

|          |                                                                                                                    |       |   |   |    |     |      |      |      |      |      |      |      |      |      |      |      |      |      |        |      |
|----------|--------------------------------------------------------------------------------------------------------------------|-------|---|---|----|-----|------|------|------|------|------|------|------|------|------|------|------|------|------|--------|------|
| O88746   | Target of Myb protein 1 OS=Mus musculus GN=Tom1 PE=1 SV=1 - [TOM1_MOUSE]                                           | 47.15 | 2 | 8 | 14 | 34  | 0.90 | 1.12 | 1.10 | 1.04 | 1.02 | 1.13 | 1.19 | 1.11 | 1.19 | 1.05 | 1.06 | 1.04 | 1.08 | 54.29  | 4.94 |
| Q8BHS8   | Isoform 2 of Syntabulin OS=Mus musculus GN=Sybu - [SYBU_MOUSE]                                                     | 4.97  | 6 | 2 | 3  | 12  | 1.25 | 1.05 | 0.92 | 0.99 | 0.85 | 1.13 | 0.91 | 1.11 | 0.93 | 1.14 | 1.04 | 1.19 | 0.99 | 72.85  | 6.38 |
| P97794   | ATP-sensitive inward rectifier potassium channel 8 OS=Mus musculus GN=Kcnj8 PE=2 SV=1 - [IRK8_MOUSE]               | 3.07  | 1 | 1 | 1  | 1   | 0.78 | 0.96 | 1.24 | 1.07 | 1.37 | 1.06 | 1.35 | 1.11 | 1.42 | 1.05 | 1.35 | 0.85 | 1.09 | 47.95  | 9.20 |
| E9PVW4   | V-set and immunoglobulin domain-containing protein 10 OS=Mus musculus GN=Vsig10 PE=2 SV=1 - [E9PVW4_MOUSE]         | 7.53  | 1 | 1 | 1  | 1   | 1.15 | 1.12 | 0.97 | 1.19 | 1.03 | 1.12 | 0.97 | 1.11 | 0.97 | 1.26 | 1.10 | 0.88 | 0.77 | 57.61  | 4.64 |
| P54728   | UV excision repair protein RAD23 homolog B OS=Mus musculus GN=Rad23b PE=1 SV=2 - [RD23B_MOUSE]                     | 43.99 | 1 | 9 | 11 | 100 | 1.01 | 0.93 | 0.88 | 0.94 | 0.89 | 1.09 | 1.09 | 1.11 | 1.03 | 1.01 | 0.97 | 0.92 | 0.86 | 43.49  | 4.83 |
| Q3TY65   | Islet cell autoantigen 1-like protein OS=Mus musculus GN=Ica11 PE=2 SV=1 - [ICA11_MOUSE]                           | 3.25  | 1 | 1 | 1  | 2   | 0.81 | 1.13 | 1.39 | 1.02 | 1.26 | 1.02 | 1.25 | 1.11 | 1.37 | 1.37 | 1.69 | 1.12 | 1.38 | 48.13  | 4.91 |
| D3Z1T2   | MCG15614 OS=Mus musculus GN=2310009B15Rik PE=4 SV=1 - [D3Z1T2_MOUSE]                                               | 6.62  | 1 | 1 | 1  | 2   | 1.04 | 1.04 | 1.00 | 0.97 | 0.94 | 0.96 | 0.92 | 1.11 | 1.07 | 0.86 | 0.83 | 0.99 | 0.96 | 14.65  | 9.11 |
| Q61527-3 | Isoform JM-A CYT-2 of Receptor tyrosine-protein kinase erbB-4 OS=Mus musculus GN=ErbB4 - [ERBB4_MOUSE]             | 2.94  | 4 | 3 | 4  | 7   | 0.97 | 1.23 | 1.24 | 0.97 | 1.00 | 1.18 | 1.18 | 1.11 | 1.16 | 1.05 | 1.10 | 1.18 | 1.24 | 145.15 | 6.39 |
| Q6DIB5   | Multiple epidermal growth factor-like domains protein 10 OS=Mus musculus GN=Megf10 PE=1 SV=1 - [MEG10_MOUSE]       | 7.76  | 1 | 6 | 6  | 10  | 1.04 | 1.17 | 1.09 | 0.89 | 0.82 | 0.98 | 1.00 | 1.11 | 1.06 | 1.02 | 0.89 | 0.98 | 0.94 | 122.89 | 7.05 |
| Q8K4P0   | pre-mRNA 3' end processing protein WDR33 OS=Mus musculus GN=Wdr33 PE=2 SV=1 - [WDR33_MOUSE]                        | 6.02  | 2 | 5 | 5  | 12  | 0.93 | 1.20 | 1.25 | 0.88 | 0.95 | 0.91 | 0.94 | 1.11 | 1.24 | 0.94 | 1.06 | 1.00 | 1.08 | 145.18 | 9.13 |
| Q3TVI8   | Pre-B-cell leukemia transcription factor-interacting protein 1 OS=Mus musculus GN=Pbxip1 PE=1 SV=2 - [PBIP1_MOUSE] | 3.99  | 4 | 2 | 2  | 3   | 1.02 | 1.41 | 1.38 | 1.03 | 1.01 | 1.13 | 1.10 | 1.11 | 1.08 | 1.24 | 1.21 | 1.41 | 1.37 | 81.12  | 5.36 |

|          |                                                                                                        |       |   |    |    |     |      |      |      |      |      |      |      |      |      |      |      |      |      |        |       |
|----------|--------------------------------------------------------------------------------------------------------|-------|---|----|----|-----|------|------|------|------|------|------|------|------|------|------|------|------|------|--------|-------|
| J3QMK2   | MCG22959, isoform CRA_a OS=Mus musculus GN=Bbip1 PE=4 SV=1 - [J3QMK2_MOUSE]                            | 41.79 | 1 | 2  | 2  | 4   | 1.05 | 0.95 | 0.90 | 1.00 | 0.95 | 1.14 | 1.08 | 1.11 | 1.05 | 1.07 | 1.02 | 1.14 | 1.09 | 7.59   | 8.76  |
| Q9CR09   | Ubiquitin-fold modifier-conjugating enzyme 1 OS=Mus musculus GN=Ufc1 PE=2 SV=1 - [UFC1_MOUSE]          | 22.75 | 2 | 4  | 4  | 9   | 0.78 | 0.90 | 1.15 | 1.07 | 1.49 | 1.02 | 1.10 | 1.11 | 1.31 | 1.13 | 1.32 | 0.93 | 1.23 | 19.47  | 7.40  |
| P62334   | 26S protease regulatory subunit 10B OS=Mus musculus GN=Psmc6 PE=1 SV=1 - [PRS10_MOUSE]                 | 53.73 | 1 | 15 | 16 | 48  | 0.99 | 1.15 | 1.15 | 1.06 | 1.03 | 1.04 | 1.01 | 1.11 | 1.09 | 1.09 | 1.08 | 1.09 | 1.07 | 44.15  | 7.49  |
| P27546-2 | Isoform 2 of Microtubule-associated protein 4 OS=Mus musculus GN=Map4 - [MAP4_MOUSE]                   | 56.23 | 7 | 23 | 44 | 278 | 1.01 | 0.87 | 0.85 | 0.92 | 0.90 | 1.12 | 1.12 | 1.11 | 1.14 | 1.03 | 1.07 | 0.95 | 0.99 | 117.27 | 4.98  |
| P63028   | Translationally-controlled tumor protein OS=Mus musculus GN=Tpt1 PE=1 SV=1 - [TCTP_MOUSE]              | 47.09 | 2 | 5  | 5  | 109 | 0.99 | 0.72 | 0.77 | 0.87 | 0.85 | 1.14 | 1.14 | 1.11 | 1.11 | 0.97 | 0.94 | 0.92 | 0.88 | 19.45  | 4.86  |
| Q8V156-2 | Isoform 2 of Low-density lipoprotein receptor-related protein 4 OS=Mus musculus GN=Lrp4 - [LRP4_MOUSE] | 0.49  | 2 | 1  | 1  | 1   | 1.31 | 1.60 | 1.22 | 1.12 | 0.86 | 0.98 | 0.74 | 1.11 | 0.85 | 1.03 | 0.79 | 1.17 | 0.90 | 205.24 | 5.36  |
| Q05915   | GTP cyclohydrolase 1 OS=Mus musculus GN=Gch1 PE=2 SV=1 - [GCH1_MOUSE]                                  | 3.73  | 1 | 1  | 1  | 2   | 1.10 | 1.03 | 0.93 | 0.93 | 0.84 | 1.31 | 1.18 | 1.11 | 1.01 | 1.24 | 1.12 | 1.09 | 0.99 | 27.00  | 8.27  |
| O54818   | Tumor protein D53 OS=Mus musculus GN=Tpd52h1 PE=2 SV=1 - [TPD53_MOUSE]                                 | 29.41 | 1 | 4  | 4  | 19  | 1.10 | 0.81 | 0.68 | 0.93 | 0.85 | 1.04 | 1.01 | 1.11 | 1.02 | 1.02 | 0.95 | 1.00 | 0.91 | 22.50  | 6.21  |
| Q8R035   | Peptidyl-RNA hydrolase ICT1, mitochondrial OS=Mus musculus GN=Ict1 PE=1 SV=1 - [ICT1_MOUSE]            | 26.21 | 4 | 5  | 5  | 8   | 0.95 | 0.76 | 0.83 | 0.79 | 0.83 | 1.08 | 1.15 | 1.11 | 1.20 | 1.07 | 1.22 | 1.07 | 1.06 | 23.46  | 10.18 |
| Q9CRD0   | OCIA domain-containing protein 1 OS=Mus musculus GN=Ociad1 PE=1 SV=1 - [OCAD1_MOUSE]                   | 47.37 | 3 | 9  | 9  | 20  | 0.92 | 0.93 | 0.92 | 0.98 | 1.06 | 1.14 | 1.20 | 1.12 | 1.17 | 1.06 | 1.05 | 1.02 | 1.08 | 27.59  | 7.81  |
| P62192   | 26S protease regulatory subunit 4 OS=Mus musculus GN=Psmc1 PE=1 SV=1 - [PRS4_MOUSE]                    | 50.45 | 1 | 15 | 16 | 46  | 0.94 | 1.03 | 1.04 | 0.94 | 1.01 | 1.14 | 1.22 | 1.12 | 1.30 | 1.10 | 1.16 | 1.10 | 1.15 | 49.15  | 6.21  |
| G3UYL7   | Protein FAM13A OS=Mus musculus GN=Fam13a PE=2 SV=1 - [G3UYL7_MOUSE]                                    | 2.71  | 3 | 1  | 2  | 3   | 1.11 | 1.09 | 0.97 | 0.91 | 0.82 | 1.33 | 1.19 | 1.12 | 1.00 | 1.08 | 0.97 | 0.93 | 0.84 | 76.32  | 5.27  |

|          |                                                                                                                       |       |    |    |    |     |      |      |      |      |      |      |      |      |      |      |      |      |      |        |      |
|----------|-----------------------------------------------------------------------------------------------------------------------|-------|----|----|----|-----|------|------|------|------|------|------|------|------|------|------|------|------|------|--------|------|
| P54227   | Stathmin OS=Mus musculus GN=Stmn1 PE=1 SV=2 - [STMN1_MOUSE]                                                           | 71.14 | 3  | 12 | 15 | 316 | 0.98 | 0.85 | 0.87 | 0.89 | 0.91 | 1.11 | 1.13 | 1.12 | 1.07 | 1.03 | 0.98 | 0.91 | 0.96 | 17.26  | 5.97 |
| B1ARW4   | NADH dehydrogenase [ubiquinone] iron-sulfur protein 5 (Fragment) OS=Mus musculus GN=Ndufs5 PE=2 SV=1 - [B1ARW4_MOUSE] | 45.05 | 2  | 4  | 4  | 72  | 0.96 | 0.91 | 0.92 | 0.94 | 0.93 | 1.08 | 1.09 | 1.12 | 1.16 | 1.01 | 1.03 | 0.98 | 0.99 | 10.90  | 8.94 |
| O35526   | Syntaxin-1A OS=Mus musculus GN=Stx1a PE=1 SV=3 - [STX1A_MOUSE]                                                        | 63.89 | 2  | 19 | 20 | 529 | 1.00 | 0.95 | 0.97 | 0.98 | 0.99 | 1.13 | 1.13 | 1.12 | 1.09 | 1.04 | 1.02 | 0.94 | 0.98 | 33.03  | 5.24 |
| P51880   | Fatty acid-binding protein, brain OS=Mus musculus GN=Fabp7 PE=1 SV=2 - [FABP7_MOUSE]                                  | 40.15 | 2  | 4  | 4  | 21  | 1.13 | 0.81 | 0.77 | 0.91 | 0.80 | 1.14 | 1.09 | 1.12 | 1.02 | 1.06 | 0.96 | 1.14 | 1.02 | 14.88  | 5.63 |
| Q6PD16-3 | Isoform 3 of Protein FAM63B OS=Mus musculus GN=Fam63b - [FAM63B_MOUSE]                                                | 15.98 | 2  | 4  | 4  | 8   | 1.08 | 1.01 | 0.98 | 1.02 | 0.93 | 1.12 | 1.02 | 1.12 | 1.03 | 1.11 | 1.09 | 1.12 | 1.06 | 41.19  | 4.60 |
| E9QML5   | Zinc finger protein 638 OS=Mus musculus GN=Zfp638 PE=2 SV=1 - [E9QML5_MOUSE]                                          | 20.04 | 8  | 27 | 27 | 50  | 1.02 | 1.01 | 0.96 | 1.03 | 0.98 | 1.17 | 1.08 | 1.12 | 1.16 | 1.10 | 1.06 | 1.06 | 1.03 | 214.33 | 6.76 |
| Q9CW79   | Isoform 2 of Golgin subfamily A member 1 OS=Mus musculus GN=Golga1 - [GOGA1_MOUSE]                                    | 12.01 | 2  | 6  | 6  | 12  | 0.92 | 1.08 | 1.18 | 0.97 | 0.99 | 1.16 | 1.09 | 1.12 | 1.19 | 1.07 | 1.08 | 1.08 | 1.13 | 84.25  | 5.50 |
| G5E920   | MCG114640 OS=Mus musculus GN=Gm6104 PE=4 SV=1 - [G5E920_MOUSE]                                                        | 50.50 | 3  | 9  | 9  | 22  | 1.09 | 0.90 | 0.81 | 1.00 | 0.95 | 1.25 | 1.06 | 1.12 | 1.04 | 1.20 | 1.05 | 1.05 | 0.96 | 23.02  | 8.37 |
| Q6PD26   | GPI transamidase component PIG-S OS=Mus musculus GN=Pigs PE=1 SV=3 - [PIGS_MOUSE]                                     | 6.49  | 1  | 3  | 3  | 4   | 1.11 | 1.38 | 1.21 | 1.14 | 1.04 | 0.85 | 0.76 | 1.12 | 1.06 | 1.12 | 1.08 | 1.08 | 1.03 | 61.67  | 6.93 |
| Q8K4G5-  | Isoform 2 of Actin-binding LIM protein 1 OS=Mus musculus GN=Ablim1 - [ABLM1_MOUSE]                                    | 58.35 | 16 | 32 | 33 | 166 | 1.04 | 0.93 | 0.89 | 0.92 | 0.89 | 1.12 | 1.06 | 1.12 | 1.06 | 1.00 | 0.95 | 0.95 | 0.89 | 78.91  | 8.25 |
| Q920D3   | Mediator of RNA polymerase II transcription subunit 28 OS=Mus musculus GN=Med28 PE=2 SV=2 - [MED28_MOUSE]             | 26.97 | 2  | 3  | 3  | 4   | 1.35 | 1.32 | 0.82 | 0.84 | 0.73 | 1.05 | 1.04 | 1.12 | 0.60 | 0.87 | 0.88 | 1.02 | 0.49 | 19.53  | 5.58 |
| P62488   | DNA-directed RNA polymerase II subunit RPB7 OS=Mus musculus GN=Polr2g PE=2 SV=1 - [RPB7_MOUSE]                        | 8.72  | 1  | 1  | 1  | 2   | 1.08 | 1.23 | 1.14 | 1.15 | 1.07 | 1.23 | 1.13 | 1.12 | 1.03 | 1.16 | 1.07 | 1.04 | 0.96 | 19.28  | 5.54 |
| E9Q179   | G-rich sequence factor 1 OS=Mus musculus GN=Grsf1 PE=2 SV=1 - [E9Q179_MOUSE]                                          | 12.98 | 2  | 3  | 3  | 5   | 0.89 | 0.96 | 0.94 | 0.81 | 0.91 | 1.06 | 1.19 | 1.12 | 1.19 | 1.07 | 1.12 | 1.01 | 0.99 | 41.58  | 5.33 |

|        |                                                                                                                 |       |   |    |    |     |      |      |      |      |      |      |      |      |      |      |      |      |      |        |      |
|--------|-----------------------------------------------------------------------------------------------------------------|-------|---|----|----|-----|------|------|------|------|------|------|------|------|------|------|------|------|------|--------|------|
| Q80W14 | Isoform 2 of Pre-mRNA-processing factor 40 homolog B<br>OS=Mus musculus<br>GN=Ppff40b -<br>[PR40B_MOUSE]        | 12.03 | 7 | 5  | 5  | 15  | 1.02 | 0.77 | 0.82 | 0.90 | 0.90 | 1.15 | 1.16 | 1.12 | 1.10 | 0.89 | 0.93 | 0.91 | 0.92 | 63.24  | 5.90 |
| D5Z6Q9 | Bridging integrator 2<br>OS=Mus musculus<br>GN=Bin2 PE=2 SV=1 -<br>[BIN2_MOUSE]                                 | 7.16  | 1 | 2  | 4  | 12  | 0.86 | 0.96 | 1.12 | 0.82 | 0.96 | 1.06 | 1.24 | 1.12 | 1.30 | 1.04 | 1.22 | 0.89 | 1.04 | 52.52  | 5.34 |
| Q62415 | Apoptosis-stimulating of p53 protein 1<br>OS=Mus musculus<br>GN=Ppp1r13b PE=1<br>SV=2 -<br>[ASPP1_MOUSE]        | 18.03 | 4 | 15 | 15 | 37  | 0.95 | 0.96 | 0.99 | 0.89 | 0.95 | 1.09 | 1.17 | 1.12 | 1.16 | 1.02 | 1.07 | 1.04 | 1.06 | 119.10 | 6.68 |
| P63040 | Complexin-1 OS=Mus musculus GN=Cplx1 PE=1 SV=1 -<br>[CPLX1_MOUSE]                                               | 64.18 | 1 | 3  | 8  | 363 | 0.92 | 0.80 | 0.87 | 0.91 | 0.98 | 1.08 | 1.18 | 1.12 | 1.22 | 0.98 | 1.03 | 0.88 | 0.95 | 15.11  | 4.97 |
| Q91X96 | Guanine nucleotide exchange factor MSS4<br>OS=Mus musculus<br>GN=Rabif PE=2 SV=1 -<br>[MSS4_MOUSE]              | 22.76 | 1 | 3  | 3  | 7   | 1.09 | 0.95 | 0.95 | 0.95 | 0.82 | 1.17 | 1.02 | 1.12 | 1.06 | 1.11 | 1.01 | 1.13 | 0.95 | 13.91  | 5.52 |
| Q91ZZ3 | Beta-synuclein<br>OS=Mus musculus<br>GN=Sncb PE=1 SV=1 -<br>[SYUB_MOUSE]                                        | 58.65 | 1 | 8  | 13 | 485 | 1.03 | 0.88 | 0.87 | 0.93 | 0.92 | 1.13 | 1.07 | 1.12 | 1.07 | 1.02 | 0.98 | 0.98 | 0.95 | 14.04  | 4.37 |
| B1AXN9 | Ribosomal protein S6 kinase alpha-3<br>OS=Mus musculus<br>GN=Rps6ka3 PE=2<br>SV=1 -<br>[B1AXN9_MOUSE]           | 2.67  | 2 | 2  | 2  | 2   | 1.15 | 1.54 | 1.34 | 1.17 | 1.01 | 1.00 | 0.87 | 1.12 | 0.97 | 1.14 | 0.99 | 1.35 | 1.18 | 80.62  | 7.15 |
| B7ZCJ1 | Rho GTPase-activating protein 21 OS=Mus musculus<br>GN=Arhgap21 PE=4<br>SV=1 -<br>[B7ZCJ1_MOUSE]                | 14.12 | 6 | 19 | 20 | 44  | 1.02 | 0.98 | 1.05 | 0.99 | 0.97 | 1.10 | 1.05 | 1.12 | 1.02 | 0.95 | 0.94 | 1.00 | 1.05 | 216.85 | 7.64 |
| Q6NS69 | APC membrane recruitment protein 3<br>OS=Mus musculus<br>GN=Amer3 PE=2<br>SV=1 -<br>[AMER3_MOUSE]               | 2.95  | 1 | 1  | 1  | 1   | 1.22 | 1.25 | 1.02 | 0.80 | 0.65 | 1.32 | 1.07 | 1.12 | 0.91 | 0.92 | 0.76 | 1.30 | 1.06 | 83.11  | 5.77 |
| E9PV48 | Protein I830012O16Rik<br>OS=Mus musculus<br>GN=I830012O16Rik<br>PE=4 SV=1 -<br>[E9PV48_MOUSE]                   | 2.23  | 2 | 1  | 1  | 4   | 1.64 | 1.10 | 0.60 | 1.16 | 0.64 | 1.22 | 0.73 | 1.12 | 0.61 | 1.00 | 0.55 | 1.04 | 0.66 | 47.19  | 5.86 |
| D3Z3A3 | SPARC-related modular calcium-binding protein 1<br>OS=Mus musculus<br>GN=Smoc1 PE=2<br>SV=1 -<br>[D3Z3A3_MOUSE] | 2.30  | 4 | 1  | 1  | 1   | 0.98 | 1.07 | 1.09 | 0.99 | 1.00 | 1.10 | 1.12 | 1.12 | 1.13 | 1.27 | 1.29 | 1.11 | 1.12 | 47.97  | 8.16 |
| Q3UFQ8 | Leucine-rich repeat-containing protein 16B<br>OS=Mus musculus<br>GN=Lrrc16b PE=2<br>SV=2 -<br>[LR16B_MOUSE]     | 1.24  | 1 | 1  | 1  | 1   | 0.92 | 1.19 | 1.29 | 0.98 | 1.06 | 0.91 | 0.98 | 1.12 | 1.21 | 1.30 | 1.41 | 1.26 | 1.37 | 150.32 | 7.72 |

|        |                                                                                                                |       |   |    |    |     |      |      |      |      |      |      |      |      |      |      |      |      |      |        |      |
|--------|----------------------------------------------------------------------------------------------------------------|-------|---|----|----|-----|------|------|------|------|------|------|------|------|------|------|------|------|------|--------|------|
| Q99L48 | 60S ribosomal export protein NMD3<br>OS=Mus musculus<br>GN=Nmd3 PE=2<br>SV=1 -<br>[NMD3_MOUSE]                 | 3.38  | 1 | 1  | 1  | 4   | 0.84 | 0.93 | 1.10 | 0.93 | 1.11 | 1.04 | 1.23 | 1.12 | 1.32 | 0.83 | 0.99 | 0.84 | 1.00 | 57.57  | 7.17 |
| G3X9D3 | Podocalyxin-like 2<br>OS=Mus musculus<br>GN=Podxl2 PE=4<br>SV=1 -<br>[G3X9D3_MOUSE]                            | 9.65  | 5 | 4  | 4  | 12  | 1.16 | 1.02 | 0.87 | 1.04 | 0.90 | 1.22 | 1.04 | 1.12 | 0.96 | 1.22 | 1.05 | 1.08 | 0.93 | 58.36  | 4.39 |
| Q3U1V8 | Mitogen-activated protein kinase kinase 9<br>OS=Mus musculus<br>GN=Map3k9 PE=2<br>SV=2 -<br>[M3K9_MOUSE]       | 5.01  | 4 | 3  | 4  | 5   | 1.27 | 1.09 | 0.93 | 1.07 | 0.86 | 1.16 | 0.91 | 1.12 | 0.88 | 1.17 | 0.93 | 1.06 | 0.84 | 118.73 | 5.86 |
| Q6GT24 | Peroxisiredoxin 6<br>OS=Mus musculus<br>GN=Prdx6 PE=2<br>SV=1 -<br>[Q6GT24_MOUSE]                              | 74.11 | 4 | 17 | 17 | 227 | 0.95 | 0.89 | 0.93 | 0.93 | 0.96 | 1.10 | 1.11 | 1.12 | 1.16 | 1.03 | 1.10 | 1.01 | 1.03 | 24.81  | 6.37 |
| P52760 | Ribonuclease UK114<br>OS=Mus musculus<br>GN=Hrsp12 PE=1<br>SV=3 -<br>[UK114_MOUSE]                             | 92.59 | 1 | 11 | 11 | 125 | 1.14 | 1.02 | 0.90 | 0.94 | 0.83 | 1.06 | 0.91 | 1.12 | 1.05 | 1.07 | 0.95 | 1.04 | 0.90 | 14.25  | 8.68 |
| P06837 | Neuromodulin<br>OS=Mus musculus<br>GN=Gap43 PE=1<br>SV=1 -<br>[NEUM_MOUSE]                                     | 83.26 | 1 | 23 | 23 | 249 | 1.25 | 0.80 | 0.63 | 0.97 | 0.78 | 1.22 | 0.98 | 1.12 | 0.89 | 1.15 | 0.95 | 1.14 | 0.94 | 23.62  | 4.73 |
| Q2PZL6 | Protocadherin Fat 4<br>OS=Mus musculus<br>GN=Fat4 PE=1<br>SV=2 -<br>[FAT4_MOUSE]                               | 0.52  | 1 | 1  | 2  | 3   | 0.96 | 0.97 | 1.01 | 0.88 | 0.91 | 1.14 | 1.18 | 1.12 | 1.16 | 1.24 | 1.30 | 1.24 | 1.29 | 539.98 | 4.91 |
| Q9R1C7 | Pre-mRNA-processing factor 40 homolog A<br>OS=Mus musculus<br>GN=Prpf40a PE=1<br>SV=1 -<br>[PR40A_MOUSE]       | 20.88 | 3 | 16 | 16 | 42  | 1.10 | 0.93 | 0.80 | 0.95 | 0.89 | 1.14 | 1.00 | 1.12 | 0.99 | 1.02 | 0.92 | 1.00 | 0.93 | 108.41 | 7.69 |
| Q8R1I1 | Cytochrome b-c1 complex subunit 9<br>OS=Mus musculus<br>GN=Uqcr10 PE=1<br>SV=1 -<br>[QCR9_MOUSE]               | 26.56 | 1 | 1  | 1  | 8   | 1.12 | 0.87 | 0.78 | 1.18 | 1.05 | 1.18 | 1.03 | 1.12 | 0.99 | 1.08 | 0.98 | 1.22 | 1.09 | 7.44   | 9.19 |
| G3UYB8 | Proline-rich protein 3 (Fragment)<br>OS=Mus musculus<br>GN=Pr3 PE=2<br>SV=1 -<br>[G3UYB8_MOUSE]                | 68.42 | 5 | 3  | 3  | 8   | 1.25 | 0.92 | 0.64 | 1.14 | 0.93 | 1.20 | 0.88 | 1.12 | 0.81 | 1.05 | 0.85 | 1.05 | 0.95 | 8.31   | 8.63 |
| Q80W04 | Transmembrane and coiled-coil domains protein 2<br>OS=Mus musculus<br>GN=Tmcc2 PE=1<br>SV=1 -<br>[TMCC2_MOUSE] | 10.20 | 3 | 3  | 4  | 9   | 0.97 | 1.31 | 1.34 | 1.11 | 1.03 | 1.07 | 1.08 | 1.12 | 1.14 | 1.18 | 1.14 | 1.40 | 1.44 | 77.01  | 6.84 |
| Q9QXN3 | Isoform 2 of Activating signal cointegrator 1<br>OS=Mus musculus<br>GN=Trip4 -<br>[TRIP4_MOUSE]                | 14.84 | 2 | 6  | 6  | 10  | 1.13 | 0.86 | 0.89 | 0.92 | 0.83 | 1.17 | 1.00 | 1.12 | 0.94 | 1.10 | 0.99 | 1.12 | 0.99 | 61.49  | 7.21 |

|         |                                                                                                                 |       |   |    |    |    |      |      |      |      |      |      |      |      |      |      |      |      |      |        |      |
|---------|-----------------------------------------------------------------------------------------------------------------|-------|---|----|----|----|------|------|------|------|------|------|------|------|------|------|------|------|------|--------|------|
| Q91YJ5  | Translation initiation factor IF-2, mitochondrial OS=Mus musculus GN=Mif2 PE=1 SV=2 - [IF2M_MOUSE]              | 2.34  | 1 | 1  | 1  | 3  | 0.89 | 1.12 | 1.17 | 1.25 | 1.06 | 0.85 | 1.04 | 1.12 | 1.03 | 0.80 | 0.90 | 0.70 | 0.79 | 81.24  | 7.24 |
| Q9ESU6  | Bromodomain-containing protein 4 OS=Mus musculus GN=Brd4 PE=1 SV=2 - [BRD4_MOUSE]                               | 10.50 | 7 | 8  | 12 | 34 | 0.91 | 0.97 | 1.00 | 0.90 | 0.97 | 1.05 | 1.16 | 1.12 | 1.24 | 1.04 | 1.11 | 0.96 | 1.08 | 155.80 | 9.19 |
| Q8BTV2- | Isoform 2 of Cleavage and polyadenylation specificity factor subunit 7 OS=Mus musculus GN=Cpsf7 - [CPSF7_MOUSE] | 19.26 | 3 | 6  | 6  | 12 | 0.96 | 0.99 | 1.09 | 0.99 | 1.04 | 0.98 | 0.98 | 1.12 | 1.13 | 1.02 | 1.06 | 0.93 | 1.00 | 51.03  | 7.78 |
| Q62446  | Peptidyl-prolyl cis-trans isomerase FKBP3 OS=Mus musculus GN=Fkbp3 PE=1 SV=2 - [FKBP3_MOUSE]                    | 59.82 | 1 | 13 | 13 | 49 | 1.10 | 0.72 | 0.71 | 0.93 | 0.84 | 1.16 | 1.08 | 1.12 | 1.05 | 1.04 | 0.94 | 0.91 | 0.90 | 25.13  | 9.28 |
| F6TY66  | Claudin-10A (Fragment) OS=Mus musculus GN=Cldn10 PE=4 SV=1 - [F6TY66_MOUSE]                                     | 12.30 | 4 | 1  | 1  | 2  | 1.12 | 2.76 | 2.47 | 1.24 | 1.11 | 1.07 | 0.96 | 1.12 | 1.00 | 1.13 | 1.01 | 1.15 | 1.04 | 13.12  | 8.76 |
| Q9JJN6  | Beta-catenin-interacting protein 1 OS=Mus musculus GN=Ctnnbip1 PE=1 SV=1 - [CNBP1_MOUSE]                        | 67.90 | 1 | 3  | 3  | 8  | 0.91 | 0.97 | 0.97 | 0.88 | 0.96 | 1.01 | 1.08 | 1.12 | 1.17 | 0.93 | 0.98 | 1.12 | 1.14 | 9.17   | 5.41 |
| Q9JG0-3 | Isoform 3 of Transforming acidic coiled-coil-containing protein 2 OS=Mus musculus GN=Tacc2 - [TACC2_MOUSE]      | 25.98 | 7 | 14 | 17 | 31 | 1.09 | 0.85 | 0.78 | 0.96 | 0.88 | 1.17 | 1.05 | 1.12 | 1.07 | 1.05 | 1.02 | 0.96 | 0.87 | 103.21 | 4.93 |
| G3UYV7  | 40S ribosomal protein S28 (Fragment) OS=Mus musculus GN=Rps28 PE=2 SV=1 - [G3UYV7_MOUSE]                        | 57.14 | 3 | 3  | 3  | 33 | 0.96 | 0.93 | 1.00 | 0.87 | 0.86 | 1.10 | 1.17 | 1.12 | 1.18 | 0.98 | 1.03 | 0.90 | 0.96 | 6.34   | 9.96 |
| Q6F3F9  | G-protein coupled receptor 126 OS=Mus musculus GN=Gpr126 PE=1 SV=1 - [GP126_MOUSE]                              | 1.12  | 1 | 1  | 1  | 1  | 0.91 | 0.71 | 0.78 | 0.90 | 0.99 | 1.20 | 1.31 | 1.12 | 1.23 | 1.14 | 1.26 | 1.07 | 1.18 | 129.64 | 6.68 |
| Q80VW5- | Isoform 2 of Whirlin OS=Mus musculus GN=Dmb31 - [WHRN_MOUSE]                                                    | 1.54  | 1 | 1  | 1  | 1  | 0.78 | 1.14 | 1.46 | 0.81 | 1.03 | 0.98 | 1.25 | 1.12 | 1.43 | 0.91 | 1.17 | 0.95 | 1.23 | 96.95  | 8.70 |
| Q5SUF2  | Luc7-like protein 3 OS=Mus musculus GN=Luc7l3 PE=1 SV=1 - [LC7L3_MOUSE]                                         | 15.51 | 4 | 5  | 6  | 18 | 1.09 | 0.96 | 0.92 | 1.13 | 1.02 | 1.23 | 1.12 | 1.12 | 0.98 | 1.10 | 0.97 | 1.07 | 0.98 | 51.42  | 9.77 |
| Q3U182  | CREB-regulated transcription coactivator 2 OS=Mus musculus GN=Crtc2 PE=1 SV=2 - [CRTC2_MOUSE]                   | 3.76  | 1 | 2  | 2  | 3  | 1.06 | 0.99 | 0.93 | 0.97 | 0.91 | 1.10 | 1.04 | 1.12 | 1.05 | 1.00 | 0.95 | 1.09 | 1.03 | 73.17  | 7.01 |



|          |                                                                                                                                                       |       |   |    |    |    |      |      |      |      |      |      |      |      |      |      |      |      |      |        |      |
|----------|-------------------------------------------------------------------------------------------------------------------------------------------------------|-------|---|----|----|----|------|------|------|------|------|------|------|------|------|------|------|------|------|--------|------|
| E9PYB0   | Protein Ahnak2 (Fragment) OS=Mus musculus GN=Ahnak2 PE=2 SV=1 - [E9PYB0_MOUSE]                                                                        | 32.60 | 1 | 2  | 11 | 17 | 1.28 | 0.83 | 0.64 | 0.81 | 0.63 | 0.88 | 0.68 | 1.12 | 0.87 | 1.19 | 0.93 | 0.71 | 0.56 | 182.59 | 7.08 |
| Q91WZ8   | Isoform 3 of Dysbindin OS=Mus musculus GN=Dtbp1 - [DTBP1_MOUSE]                                                                                       | 10.70 | 4 | 2  | 2  | 5  | 1.05 | 0.66 | 0.63 | 0.92 | 0.88 | 1.23 | 1.16 | 1.12 | 1.06 | 1.12 | 1.07 | 1.09 | 1.04 | 30.56  | 4.45 |
| D3YWT1   | MCG11326, isoform CRA_b OS=Mus musculus GN=Hnrph3 PE=4 SV=1 - [D3YWT1_MOUSE]                                                                          | 26.89 | 2 | 5  | 6  | 14 | 1.13 | 0.95 | 0.82 | 1.13 | 0.96 | 1.15 | 0.95 | 1.12 | 0.87 | 1.11 | 0.96 | 1.14 | 1.02 | 35.16  | 6.87 |
| Q9D6U8   | Protein FAM162A OS=Mus musculus GN=Fam162a PE=2 SV=1 - [F162A_MOUSE]                                                                                  | 16.77 | 1 | 3  | 3  | 13 | 1.11 | 1.02 | 0.93 | 1.16 | 1.08 | 1.21 | 1.09 | 1.12 | 1.06 | 1.25 | 1.04 | 1.16 | 1.18 | 17.71  | 9.88 |
| Q6PHS9-5 | Isoform 5 of Voltage-dependent calcium channel subunit alpha-2/delta-2 OS=Mus musculus GN=Cacna2d2 - [CA2D2_MOUSE]                                    | 12.78 | 4 | 1  | 13 | 27 | 0.82 | 1.16 | 1.41 | 0.98 | 1.19 | 1.17 | 1.43 | 1.12 | 1.36 | 1.05 | 1.29 | 0.73 | 0.90 | 129.88 | 5.60 |
| Q9CY14   | Putative RNA-binding protein Luc7-like 1 OS=Mus musculus GN=Luc7l PE=2 SV=2 - [LUC7L_MOUSE]                                                           | 18.33 | 7 | 5  | 7  | 16 | 1.20 | 1.15 | 0.85 | 1.12 | 1.09 | 1.08 | 0.97 | 1.12 | 1.07 | 1.22 | 1.05 | 1.12 | 1.02 | 43.91  | 9.88 |
| Q9QYE6   | Golgin subfamily A member 5 OS=Mus musculus GN=Golga5 PE=1 SV=2 - [GOGA5_MOUSE]                                                                       | 6.86  | 1 | 5  | 5  | 8  | 0.96 | 1.08 | 1.12 | 0.98 | 1.06 | 1.10 | 1.19 | 1.12 | 1.25 | 1.02 | 1.14 | 0.97 | 0.98 | 82.32  | 6.23 |
| F70663   | SPARC-like protein 1 OS=Mus musculus GN=Sparcl1 PE=1 SV=3 - [SPRL1_MOUSE]                                                                             | 49.08 | 1 | 21 | 21 | 83 | 0.97 | 0.87 | 0.89 | 0.90 | 0.93 | 1.11 | 1.12 | 1.12 | 1.14 | 0.98 | 1.03 | 0.90 | 0.96 | 72.24  | 4.60 |
| P09055   | Integrin beta-1 OS=Mus musculus GN=Itgb1 PE=1 SV=1 [ITB1_MOUSE]                                                                                       | 8.90  | 1 | 5  | 5  | 9  | 0.94 | 1.22 | 1.25 | 1.10 | 1.05 | 0.92 | 1.00 | 1.12 | 1.10 | 1.12 | 1.22 | 1.16 | 1.19 | 88.17  | 5.94 |
| Q61466-2 | Isoform 1 of SWI/SNF-related matrix-associated actin-dependent regulator of chromatin subfamily D member 1 OS=Mus musculus GN=Smarca1 - [SMRD1_MOUSE] | 9.34  | 4 | 2  | 3  | 8  | 1.03 | 1.16 | 1.18 | 0.99 | 0.81 | 1.09 | 1.05 | 1.12 | 0.91 | 1.14 | 0.91 | 1.31 | 1.33 | 58.02  | 9.17 |
| Q64291   | Keratin, type 1 cytoskeletal 12 OS=Mus musculus GN=Krt12 PE=1 SV=2 - [K1C12_MOUSE]                                                                    | 1.85  | 1 | 1  | 1  | 1  | 0.81 | 0.94 | 1.17 | 0.85 | 1.05 | 1.05 | 1.29 | 1.12 | 1.38 | 0.82 | 1.02 | 0.84 | 1.05 | 52.43  | 4.82 |
| E9QK16   | Protocadherin Fat 3 OS=Mus musculus GN=Fat3 PE=2 SV=1 - [E9QK16_MOUSE]                                                                                | 0.57  | 2 | 2  | 2  | 2  | 0.98 | 1.09 | 1.11 | 1.09 | 1.11 | 0.94 | 0.96 | 1.12 | 1.14 | 1.00 | 1.03 | 0.92 | 0.95 | 501.28 | 4.87 |

|          |                                                                                                                   |       |    |    |    |    |      |      |      |      |      |      |      |      |      |      |      |      |      |        |      |
|----------|-------------------------------------------------------------------------------------------------------------------|-------|----|----|----|----|------|------|------|------|------|------|------|------|------|------|------|------|------|--------|------|
| Q9CQ46   | EF-hand calcium-binding domain-containing protein 2 OS=Mus musculus GN=Efcab2 PE=2 SV=1 - [EFCB2_MOUSE]           | 6.71  | 1  | 1  | 1  | 1  | 1.10 | 1.13 | 1.02 | 0.93 | 0.85 | 1.22 | 1.10 | 1.12 | 1.01 | 1.07 | 0.97 | 1.06 | 0.97 | 18.92  | 4.45 |
| D3Z4B1   | Intraflagellar transport protein 46 homolog (Fragment) OS=Mus musculus GN=If46 PE=2 SV=1 - [D3Z4B1_MOUSE]         | 9.73  | 2  | 1  | 1  | 1  | 0.91 | 0.63 | 0.69 | 0.78 | 0.86 | 1.17 | 1.28 | 1.12 | 1.23 | 0.98 | 1.08 | 0.78 | 0.86 | 12.81  | 4.04 |
| Q9D113   | DNL-type zinc finger protein OS=Mus musculus GN=Dnlz PE=2 SV=1 - [DNLZ_MOUSE]                                     | 12.43 | 1  | 2  | 2  | 5  | 1.06 | 1.13 | 0.98 | 0.94 | 0.88 | 1.04 | 1.04 | 1.12 | 1.14 | 0.93 | 0.84 | 0.91 | 0.85 | 19.39  | 9.48 |
| O35857   | Mitochondrial import inner membrane translocase subunit TIM44 OS=Mus musculus GN=Timm44 PE=2 SV=2 - [TIM44_MOUSE] | 24.78 | 2  | 10 | 10 | 28 | 0.97 | 0.98 | 1.01 | 0.97 | 0.95 | 1.08 | 1.11 | 1.12 | 1.16 | 1.09 | 1.09 | 1.02 | 1.04 | 51.06  | 8.13 |
| Q04886   | Transcription factor SOX-8 OS=Mus musculus GN=Sox8 PE=2 SV=2 - [SOX8_MOUSE]                                       | 7.76  | 2  | 2  | 2  | 3  | 0.95 | 4.42 | 4.67 | 1.50 | 1.58 | 1.39 | 1.46 | 1.12 | 1.18 | 1.06 | 1.12 | 0.88 | 0.94 | 49.85  | 7.15 |
| E9PW16   | GRIP and coiled-coil domain-containing protein 2 OS=Mus musculus GN=Gcc2 PE=2 SV=1 - [E9PW16_MOUSE]               | 27.19 | 6  | 42 | 42 | 87 | 0.98 | 0.89 | 0.94 | 0.90 | 0.91 | 1.06 | 1.07 | 1.12 | 1.16 | 1.00 | 0.99 | 0.95 | 0.96 | 190.62 | 5.12 |
| Q07079   | Insulin-like growth factor-binding protein 5 OS=Mus musculus GN=Igfbp5 PE=1 SV=1 - [IBP5_MOUSE]                   | 17.34 | 1  | 4  | 4  | 9  | 1.17 | 1.05 | 0.95 | 0.98 | 0.80 | 1.11 | 0.97 | 1.12 | 0.93 | 1.03 | 0.94 | 1.11 | 1.05 | 30.35  | 8.12 |
| Q9QWV9   | Cyclin-T1 OS=Mus musculus GN=Cnt1 PE=1 SV=3 - [CCNT1_MOUSE]                                                       | 2.21  | 1  | 1  | 1  | 1  | 1.02 | 0.64 | 0.63 | 1.00 | 0.98 | 1.08 | 1.06 | 1.12 | 1.10 | 1.06 | 1.05 | 0.88 | 0.87 | 80.55  | 8.68 |
| P83741-4 | Isoform 4 of Serine/threonine-protein kinase WNK1 OS=Mus musculus GN=Wnk1 - [WNK1_MOUSE]                          | 10.90 | 13 | 16 | 20 | 43 | 1.03 | 0.87 | 0.88 | 0.97 | 0.96 | 1.16 | 1.21 | 1.12 | 1.18 | 1.16 | 1.16 | 1.12 | 1.15 | 225.27 | 6.51 |
| Q501J7-2 | Isoform 2 of Phosphatase and actin regulator 4 OS=Mus musculus GN=Phacr4 - [PHAR4_MOUSE]                          | 13.04 | 3  | 5  | 7  | 20 | 1.15 | 1.08 | 0.93 | 0.98 | 0.83 | 1.23 | 1.04 | 1.12 | 0.98 | 1.01 | 0.96 | 0.95 | 1.00 | 73.36  | 6.38 |
| O70230-3 | Isoform 3 of Zinc finger protein 143 OS=Mus musculus GN=Zn143 - [ZN143_MOUSE]                                     | 8.69  | 3  | 2  | 2  | 3  | 0.72 | 0.60 | 0.83 | 0.63 | 0.88 | 1.19 | 1.64 | 1.12 | 1.56 | 0.98 | 1.37 | 0.85 | 1.18 | 65.99  | 6.32 |

|          |                                                                                                                   |       |    |    |    |     |      |      |      |      |      |      |      |      |      |      |      |      |      |        |      |
|----------|-------------------------------------------------------------------------------------------------------------------|-------|----|----|----|-----|------|------|------|------|------|------|------|------|------|------|------|------|------|--------|------|
| P49312   | Heterogeneous nuclear ribonucleoprotein A1 OS=Mus musculus GN=Hnrpa1 PE=1 SV=2 - [ROA1_MOUSE]                     | 57.19 | 4  | 13 | 18 | 299 | 0.96 | 0.85 | 0.90 | 0.87 | 0.91 | 1.07 | 1.11 | 1.12 | 1.20 | 0.98 | 1.03 | 0.92 | 1.00 | 34.18  | 9.23 |
| J3QMA8   | U11/U12 small nuclear ribonucleoprotein 48 kDa protein OS=Mus musculus GN=Smp48 PE=4 SV=1 - [J3QMA8_MOUSE]        | 3.65  | 3  | 1  | 1  | 2   | 1.35 | 3.88 | 2.87 | 1.24 | 0.92 | 1.16 | 0.85 | 1.12 | 0.83 | 1.04 | 0.77 | 1.14 | 0.85 | 32.07  | 7.55 |
| Q3TKX1   | ATPase, H+ transporting, lysosomal accessory protein OS=Mus musculus GN=Atp6ap1 PE=2 SV=1 - [Q3TKX1_MOUSE]        | 18.07 | 5  | 5  | 5  | 9   | 1.00 | 0.90 | 0.90 | 1.05 | 1.01 | 1.10 | 1.08 | 1.12 | 1.05 | 1.14 | 1.11 | 1.07 | 0.99 | 45.51  | 5.63 |
| Q60865   | Caprin-1 OS=Mus musculus GN=Caprin1 PE=1 SV=2 - [CAPR1_MOUSE]                                                     | 21.07 | 4  | 11 | 11 | 76  | 1.02 | 0.76 | 0.73 | 0.95 | 0.90 | 1.17 | 1.09 | 1.12 | 1.08 | 1.06 | 1.01 | 0.95 | 0.90 | 78.12  | 5.25 |
| Q8CHE4   | PH domain leucine-rich repeat-containing protein phosphatase 1 OS=Mus musculus GN=Phlp1 PE=2 SV=2 - [PHLP1_MOUSE] | 6.11  | 1  | 4  | 4  | 6   | 0.97 | 1.04 | 1.10 | 0.90 | 0.95 | 1.10 | 1.16 | 1.12 | 1.09 | 1.14 | 1.10 | 0.99 | 1.03 | 182.25 | 6.19 |
| Q8VIM9   | Immunity-related GTPase family Q protein OS=Mus musculus GN=Irgq PE=2 SV=1 - [IRGQ_MOUSE]                         | 20.93 | 1  | 10 | 10 | 36  | 0.93 | 1.13 | 1.23 | 1.05 | 1.04 | 1.06 | 1.13 | 1.12 | 1.14 | 1.06 | 1.18 | 1.09 | 1.15 | 59.29  | 4.83 |
| Q6DIC0   | Probable global transcription activator SNF2L2 OS=Mus musculus GN=Smarca2 PE=1 SV=1 - [SMCA2_MOUSE]               | 8.62  | 12 | 7  | 13 | 21  | 1.01 | 0.91 | 0.92 | 0.99 | 1.10 | 1.13 | 1.10 | 1.12 | 1.11 | 1.03 | 1.07 | 1.03 | 1.15 | 180.14 | 7.20 |
| Q640M1   | U3 small nucleolar RNA-associated protein 14 homolog A OS=Mus musculus GN=Utp14a PE=2 SV=1 - [UT14A_MOUSE]        | 1.56  | 1  | 1  | 1  | 2   | 1.08 | 1.13 | 1.05 | 0.99 | 0.92 | 1.07 | 0.99 | 1.12 | 1.03 | 1.06 | 0.98 | 1.06 | 0.98 | 87.21  | 9.20 |
| D3YTQ3   | Heterogeneous nuclear ribonucleoprotein D-like OS=Mus musculus GN=Hnrpd1 PE=2 SV=1 - [D3YTQ3_MOUSE]               | 40.71 | 13 | 16 | 18 | 113 | 1.09 | 0.90 | 0.85 | 0.95 | 0.90 | 1.19 | 1.15 | 1.12 | 1.01 | 0.98 | 0.95 | 0.98 | 0.97 | 46.24  | 9.57 |
| Q05A62-2 | Isoform 2 of Dynein light chain 1, axonemal OS=Mus musculus GN=Dnal1 - [DNAL1_MOUSE]                              | 40.91 | 6  | 5  | 5  | 8   | 0.89 | 0.66 | 0.74 | 0.85 | 0.97 | 1.08 | 1.20 | 1.12 | 1.27 | 0.95 | 1.09 | 0.95 | 1.09 | 19.87  | 5.49 |
| Q68FE8   | Zinc finger protein 280D OS=Mus musculus GN=Znf280d PE=2 SV=1 - [Z280D_MOUSE]                                     | 4.41  | 2  | 3  | 3  | 8   | 0.80 | 0.94 | 1.17 | 0.95 | 1.00 | 1.09 | 1.33 | 1.12 | 1.36 | 0.88 | 1.14 | 0.90 | 1.10 | 107.77 | 6.84 |

|         |                                                                                                                       |       |   |    |    |     |      |      |      |      |      |      |      |      |      |      |      |      |      |        |      |
|---------|-----------------------------------------------------------------------------------------------------------------------|-------|---|----|----|-----|------|------|------|------|------|------|------|------|------|------|------|------|------|--------|------|
| Q8K1N4- | Isoform 2 of Spermatogenesis-associated serine-rich protein 2 OS=Mus musculus GN=Spats2 - [SPAS2_MOUSE]               | 11.08 | 2 | 3  | 3  | 7   | 0.91 | 1.09 | 1.05 | 0.83 | 0.87 | 1.08 | 1.14 | 1.12 | 1.23 | 1.04 | 1.05 | 0.89 | 0.96 | 39.47  | 6.95 |
| H9KV15  | Protein SON OS=Mus musculus GN=Son PE=2 SV=1 - [H9KV15_MOUSE]                                                         | 12.33 | 9 | 17 | 17 | 36  | 1.01 | 0.97 | 0.93 | 0.98 | 1.00 | 1.09 | 1.14 | 1.12 | 1.17 | 1.10 | 1.12 | 1.12 | 1.08 | 253.88 | 5.40 |
| E9Q5B2  | Protein 0610011F06Rik OS=Mus musculus GN=0610011F06Rik PE=2 SV=1 - [E9Q5B2_MOUSE]                                     | 16.82 | 3 | 1  | 1  | 2   | 0.98 | 1.35 | 1.37 | 1.44 | 1.46 | 1.16 | 1.18 | 1.12 | 1.14 | 1.23 | 1.25 | 1.38 | 1.40 | 12.03  | 5.48 |
| Q8BWP8- | Isoform 2 of N-acetyllactosaminide beta-1,3-N-acetylglucosaminyltransferase OS=Mus musculus GN=B3gnt1 - [B3GN1_MOUSE] | 8.71  | 2 | 3  | 3  | 6   | 1.16 | 1.50 | 1.28 | 1.17 | 1.01 | 0.99 | 0.87 | 1.12 | 0.99 | 1.29 | 1.05 | 1.30 | 1.04 | 42.98  | 7.71 |
| O08917  | Flotillin-1 OS=Mus musculus GN=Flot1 PE=1 SV=1 - [FLOT1_MOUSE]                                                        | 47.66 | 4 | 15 | 15 | 78  | 1.05 | 1.01 | 0.96 | 1.11 | 1.04 | 1.09 | 1.07 | 1.12 | 1.00 | 1.10 | 1.06 | 1.12 | 1.03 | 47.48  | 7.15 |
| O35900  | U6 snRNA-associated Sm-like protein LSM2 OS=Mus musculus GN=Lsm2 PE=2 SV=1 - [LSM2_MOUSE]                             | 83.16 | 3 | 7  | 7  | 13  | 1.15 | 0.90 | 0.78 | 0.96 | 0.85 | 1.08 | 0.92 | 1.12 | 0.92 | 0.84 | 0.75 | 1.00 | 0.79 | 10.83  | 6.52 |
| Q5HZ12  | C2 calcium-dependent domain-containing protein 4C OS=Mus musculus GN=C2cd4cC2CD4 family PE=2 SV=1 - [C2C4C_MOUSE]     | 37.23 | 1 | 7  | 7  | 11  | 1.08 | 0.96 | 1.06 | 0.86 | 0.84 | 1.13 | 1.01 | 1.12 | 1.00 | 1.13 | 0.97 | 1.08 | 1.02 | 44.59  | 9.73 |
| Q80VC9- | Isoform 2 of Calmodulin-regulated spectrin-associated protein 3 OS=Mus musculus GN=Camsap3 - [CAMP3_MOUSE]            | 14.55 | 3 | 9  | 9  | 24  | 1.03 | 1.10 | 1.18 | 0.95 | 0.95 | 0.94 | 0.97 | 1.12 | 1.09 | 1.09 | 1.08 | 1.12 | 1.09 | 127.69 | 8.19 |
| Q9D6W8  | Uncharacterized protein C17orf39 homolog OS=Mus musculus PE=1 SV=1 - [CQ059_MOUSE]                                    | 25.56 | 1 | 4  | 4  | 8   | 0.97 | 1.05 | 1.15 | 0.90 | 0.99 | 1.03 | 1.13 | 1.12 | 1.17 | 1.15 | 1.24 | 1.17 | 1.27 | 37.99  | 5.34 |
| Q3UH10  | Serine-rich coiled-coil domain-containing protein 2 OS=Mus musculus GN=Ceser2 PE=1 SV=1 - [CCSE2_MOUSE]               | 5.16  | 2 | 3  | 3  | 5   | 0.90 | 0.80 | 0.89 | 0.98 | 0.98 | 1.19 | 1.19 | 1.12 | 1.17 | 1.11 | 1.18 | 1.02 | 0.99 | 92.87  | 6.46 |
| Q9Z0P4- | Isoform 2 of Paralemm-1 OS=Mus musculus GN=Palm - [PALM_MOUSE]                                                        | 70.50 | 1 | 1  | 24 | 372 | 0.97 | 0.94 | 0.91 | 0.93 | 0.92 | 1.17 | 1.18 | 1.12 | 1.06 | 1.03 | 1.03 | 1.03 | 1.05 | 36.70  | 4.84 |

|          |                                                                                                                          |       |   |    |    |      |      |      |      |      |      |      |      |      |      |      |      |      |      |        |       |
|----------|--------------------------------------------------------------------------------------------------------------------------|-------|---|----|----|------|------|------|------|------|------|------|------|------|------|------|------|------|------|--------|-------|
| Q8C132   | BAG family molecular chaperone regulator 5<br>OS=Mus musculus<br>GN=Bag5 PE=1 SV=1<br>[BAG5_MOUSE]                       | 23.94 | 2 | 7  | 7  | 15   | 0.98 | 0.89 | 0.91 | 1.05 | 1.08 | 1.08 | 1.03 | 1.12 | 1.11 | 1.13 | 1.18 | 1.17 | 1.14 | 50.91  | 6.05  |
| Q5XJV6   | Serine/threonine-protein kinase LMTK3<br>OS=Mus musculus<br>GN=Lmtk3 PE=1<br>SV=1 -<br>[LMTK3_MOUSE]                     | 23.60 | 4 | 19 | 19 | 53   | 1.03 | 1.06 | 1.03 | 0.98 | 0.95 | 1.28 | 1.23 | 1.12 | 1.12 | 1.10 | 1.09 | 1.09 | 1.01 | 150.80 | 4.88  |
| D3Z7N3   | Cell growth-regulating nucleolar protein (Fragment)<br>OS=Mus musculus<br>GN=Lyar PE=2 SV=1 -<br>[D3Z7N3_MOUSE]          | 10.53 | 6 | 2  | 2  | 9    | 1.02 | 1.00 | 0.97 | 1.03 | 1.05 | 1.04 | 0.99 | 1.12 | 1.18 | 1.26 | 1.20 | 1.12 | 1.08 | 21.60  | 8.69  |
| Q9D6I9   | Leucine rich adaptor protein 1<br>OS=Mus musculus<br>GN=Lurap1 PE=2 SV=1 -<br>[LURAP1_MOUSE]                             | 14.23 | 1 | 2  | 2  | 6    | 0.97 | 1.04 | 1.06 | 0.85 | 0.90 | 0.75 | 0.81 | 1.12 | 1.01 | 1.06 | 1.02 | 1.02 | 1.05 | 25.81  | 4.72  |
| Q91XV3   | Brain acid soluble protein 1<br>OS=Mus musculus<br>GN=Basp1 PE=1 SV=3 -<br>[BASP1_MOUSE]                                 | 91.15 | 1 | 25 | 25 | 1428 | 1.03 | 0.86 | 0.85 | 0.98 | 0.96 | 1.14 | 1.11 | 1.12 | 1.10 | 1.04 | 1.01 | 0.97 | 0.95 | 22.07  | 4.51  |
| P43277   | Histone H1.3<br>OS=Mus musculus<br>GN=H1h1d PE=1 SV=2 -<br>[H13_MOUSE]                                                   | 43.44 | 3 | 2  | 16 | 81   | 1.04 | 0.67 | 0.65 | 0.97 | 0.93 | 1.13 | 1.08 | 1.12 | 1.08 | 1.10 | 1.06 | 0.99 | 0.95 | 22.09  | 11.03 |
| Q9D9Z5   | DET1- and DDB1-associated protein 1<br>OS=Mus musculus<br>GN=Dda1 PE=2 SV=1 -<br>[DDA1_MOUSE]                            | 44.12 | 3 | 4  | 4  | 10   | 0.95 | 0.88 | 0.95 | 0.91 | 0.97 | 1.09 | 1.37 | 1.12 | 1.27 | 1.04 | 1.13 | 1.03 | 1.12 | 11.75  | 8.68  |
| Q9ES97-2 | Isoform 2 of Reticulon-3<br>OS=Mus musculus<br>GN=Rtn3 -<br>[RTN3_MOUSE]                                                 | 50.79 | 5 | 37 | 37 | 153  | 0.97 | 0.94 | 0.98 | 0.95 | 0.97 | 1.14 | 1.16 | 1.12 | 1.16 | 1.02 | 1.05 | 0.97 | 1.00 | 101.86 | 4.93  |
| D9HP81   | Regulating synaptic membrane exocytosis 2<br>OS=Mus musculus<br>GN=Rims2 PE=2 SV=1 -<br>[D9HP81_MOUSE]                   | 12.21 | 4 | 12 | 15 | 26   | 1.05 | 1.09 | 1.12 | 0.92 | 0.89 | 1.01 | 0.96 | 1.12 | 1.00 | 0.95 | 0.92 | 1.01 | 0.96 | 177.51 | 9.36  |
| Q91Z38   | Tetratricopeptide repeat protein 1<br>OS=Mus musculus<br>GN=Ttc1 PE=2 SV=1 -<br>[TTC1_MOUSE]                             | 54.45 | 2 | 11 | 11 | 42   | 0.99 | 0.80 | 0.77 | 0.88 | 0.89 | 1.19 | 1.17 | 1.12 | 1.18 | 1.10 | 1.06 | 1.02 | 1.10 | 33.24  | 5.01  |
| Q0KK56   | Protein FAM184B<br>OS=Mus musculus<br>GN=Fam184b PE=2 SV=1 -<br>[F184B_MOUSE]                                            | 2.34  | 2 | 1  | 2  | 3    | 0.89 | 1.20 | 1.35 | 0.92 | 1.03 | 1.06 | 1.19 | 1.12 | 1.27 | 0.99 | 1.12 | 0.79 | 0.90 | 107.53 | 5.78  |
| Q9EST3-2 | Isoform 2 of Eukaryotic translation initiation factor 4E transporter<br>OS=Mus musculus<br>GN=Eif4enif1 -<br>[4ET_MOUSE] | 7.72  | 5 | 5  | 5  | 12   | 1.11 | 1.00 | 0.84 | 0.95 | 0.89 | 1.15 | 1.00 | 1.12 | 1.06 | 1.06 | 1.03 | 1.05 | 0.96 | 105.33 | 7.72  |

|          |                                                                                                                      |       |   |    |    |     |      |      |      |      |      |      |      |      |      |      |      |      |      |        |      |
|----------|----------------------------------------------------------------------------------------------------------------------|-------|---|----|----|-----|------|------|------|------|------|------|------|------|------|------|------|------|------|--------|------|
| D3Z641   | Tetraspanin-5 OS=Mus musculus GN=Tspan5 PE=4 SV=1 - [D3Z641_MOUSE]                                                   | 7.11  | 2 | 1  | 1  | 1   | 1.11 | 1.33 | 1.20 | 1.04 | 0.94 | 1.08 | 0.97 | 1.12 | 1.01 | 1.25 | 1.13 | 1.03 | 0.94 | 22.45  | 4.60 |
| Q3TMX0   | MCG4375, isoform CRA_b OS=Mus musculus GN=Sdcbp PE=2 SV=1 - [Q3TMX0_MOUSE]                                           | 16.78 | 5 | 2  | 2  | 7   | 1.21 | 1.53 | 1.26 | 1.29 | 0.95 | 1.10 | 0.91 | 1.12 | 0.90 | 1.27 | 1.08 | 1.27 | 1.12 | 32.23  | 7.15 |
| Q69ZK6   | Probable JmjC domain-containing histone demethylation protein 2C OS=Mus musculus GN=Jmjd1c PE=1 SV=3 - [JHD2C_MOUSE] | 0.51  | 2 | 1  | 1  | 2   | 0.85 | 1.21 | 1.42 | 1.00 | 1.18 | 1.17 | 1.37 | 1.12 | 1.32 | 1.08 | 1.28 | 1.23 | 1.45 | 260.48 | 8.07 |
| O55026-2 | Isoform Short of Ectonucleoside triphosphate diphosphohydrolase 2 OS=Mus musculus GN=Entpd2 - [ENTP2_MOUSE]          | 31.82 | 2 | 3  | 3  | 6   | 1.01 | 1.25 | 1.10 | 1.10 | 0.96 | 0.99 | 0.96 | 1.12 | 0.88 | 1.12 | 1.09 | 1.18 | 0.92 | 13.85  | 6.52 |
| Q9D6L8   | Peptidyl-prolyl cis-trans isomerase-like 3 OS=Mus musculus GN=Ppil3 PE=2 SV=1 - [PPIL3_MOUSE]                        | 8.07  | 1 | 1  | 1  | 4   | 1.27 | 0.85 | 0.67 | 0.94 | 0.74 | 1.39 | 1.09 | 1.12 | 0.88 | 1.08 | 0.86 | 1.19 | 0.94 | 18.12  | 6.79 |
| O08663   | Methionine aminopeptidase 2 OS=Mus musculus GN=Metap2 PE=1 SV=1 - [MAP2_MOUSE]                                       | 21.34 | 7 | 7  | 7  | 20  | 1.06 | 0.84 | 0.83 | 1.03 | 0.98 | 0.99 | 0.92 | 1.12 | 1.04 | 1.08 | 1.07 | 1.00 | 0.93 | 52.89  | 5.82 |
| Q55WP3   | NAC-alpha domain-containing protein 1 OS=Mus musculus GN=Nacad PE=1 SV=1 - [NACAD_MOUSE]                             | 19.28 | 2 | 18 | 18 | 42  | 0.98 | 0.85 | 0.88 | 0.90 | 0.92 | 1.15 | 1.16 | 1.12 | 1.12 | 1.02 | 1.03 | 0.88 | 0.92 | 156.67 | 4.56 |
| Q8BKV0   | Testican-3 OS=Mus musculus GN=Spock3 PE=2 SV=2 - [TICN3_MOUSE]                                                       | 5.96  | 2 | 2  | 2  | 4   | 1.05 | 0.99 | 1.11 | 0.87 | 0.97 | 1.15 | 1.16 | 1.12 | 1.14 | 1.23 | 1.18 | 0.99 | 1.13 | 49.07  | 5.10 |
| O08585   | Claathrin light chain A OS=Mus musculus GN=Chta PE=1 SV=2 - [CLCA_MOUSE]                                             | 25.11 | 5 | 1  | 9  | 152 | 1.02 | 0.76 | 0.75 | 0.91 | 0.90 | 1.08 | 1.06 | 1.13 | 1.07 | 0.97 | 0.94 | 0.95 | 0.92 | 25.59  | 4.58 |
| F7B0R9   | Protein 2010300C02Rik (Fragment) OS=Mus musculus GN=2010300C02Rik PE=4 SV=1 - [F7B0R9_MOUSE]                         | 68.56 | 1 | 1  | 31 | 158 | 0.96 | 0.84 | 0.88 | 1.07 | 1.11 | 1.14 | 1.19 | 1.13 | 1.17 | 1.03 | 1.08 | 1.05 | 1.10 | 69.48  | 9.39 |
| P62317   | Small nuclear ribonucleoprotein Sm D2 OS=Mus musculus GN=Snrpd2 PE=1 SV=1 - [SMD2_MOUSE]                             | 40.68 | 2 | 5  | 5  | 22  | 0.96 | 0.89 | 0.98 | 0.88 | 0.96 | 1.12 | 1.06 | 1.13 | 1.18 | 0.98 | 1.09 | 0.98 | 0.99 | 13.52  | 9.91 |
| P31786   | Acyl-CoA-binding protein OS=Mus musculus GN=Dbi PE=1 SV=2 - [ACBP_MOUSE]                                             | 70.11 | 5 | 9  | 9  | 158 | 1.27 | 0.77 | 0.61 | 0.90 | 0.69 | 1.18 | 0.93 | 1.13 | 0.86 | 1.08 | 0.82 | 1.09 | 0.89 | 9.99   | 8.82 |

|          |                                                                                                                |       |   |    |    |     |      |      |      |      |      |      |      |      |      |      |      |      |      |        |       |
|----------|----------------------------------------------------------------------------------------------------------------|-------|---|----|----|-----|------|------|------|------|------|------|------|------|------|------|------|------|------|--------|-------|
| Q69ZL1   | FYVE, RhoGEF and PH domain-containing protein 6 OS=Mus musculus GN=Fgd6 PE=1 SV=2 - [FGD6_MOUSE]               | 2.64  | 1 | 2  | 2  | 4   | 1.11 | 1.05 | 0.94 | 0.94 | 0.85 | 1.09 | 0.97 | 1.13 | 1.01 | 1.10 | 0.98 | 1.01 | 0.91 | 155.07 | 7.87  |
| B2RQ57   | Abelson tyrosine-protein kinase 2 OS=Mus musculus GN=Abi2 PE=2 SV=1 - [B2RQ57_MOUSE]                           | 14.10 | 4 | 8  | 8  | 16  | 1.01 | 0.96 | 0.92 | 0.93 | 0.91 | 1.18 | 0.99 | 1.13 | 1.07 | 1.14 | 1.07 | 1.14 | 1.13 | 117.69 | 7.66  |
| P17095   | High mobility group protein HMG-1/HMG-Y OS=Mus musculus GN=Hmg1 PE=1 SV=4 - [HMGA1_MOUSE]                      | 48.60 | 2 | 5  | 5  | 16  | 1.09 | 0.85 | 0.78 | 1.05 | 0.93 | 1.09 | 0.95 | 1.13 | 0.98 | 1.11 | 0.98 | 0.99 | 0.86 | 11.61  | 10.32 |
| B2RU55   | Amyloid beta A4 precursor protein-binding family A member 1 OS=Mus musculus GN=Apba1 PE=2 SV=2 - [APBA1_MOUSE] | 27.55 | 2 | 12 | 13 | 79  | 0.96 | 1.03 | 1.16 | 0.98 | 1.00 | 1.03 | 1.09 | 1.13 | 1.14 | 0.99 | 1.00 | 1.00 | 1.07 | 92.85  | 4.88  |
| P51125-3 | Isoform 3 of Calpastatin OS=Mus musculus GN=Cast - [ICAL_MOUSE]                                                | 38.65 | 8 | 18 | 18 | 57  | 1.01 | 0.85 | 0.88 | 0.89 | 0.87 | 1.10 | 1.06 | 1.13 | 1.09 | 0.99 | 0.95 | 0.89 | 0.91 | 79.65  | 5.54  |
| Q3UHX2   | 28 kDa heat- and acid-stable phosphoprotein OS=Mus musculus GN=Pdap1 PE=1 SV=1 - [HAP28_MOUSE]                 | 42.54 | 1 | 9  | 9  | 88  | 0.97 | 0.91 | 0.94 | 0.90 | 0.94 | 1.16 | 1.17 | 1.13 | 1.12 | 1.05 | 1.02 | 0.86 | 0.91 | 20.59  | 7.39  |
| Q9QYM9   | Tomoregulin-2 OS=Mus musculus GN=Tmeff2 PE=2 SV=1 - [TEFF2_MOUSE]                                              | 4.55  | 1 | 2  | 2  | 4   | 1.02 | 0.84 | 0.80 | 1.07 | 1.01 | 1.16 | 1.13 | 1.13 | 1.11 | 1.12 | 1.10 | 1.05 | 1.00 | 41.39  | 5.15  |
| Q8BT18-3 | Isoform 3 of Serine/arginine repetitive matrix protein 2 OS=Mus musculus GN=Srrm2 - [SRRM2_MOUSE]              | 21.17 | 3 | 37 | 37 | 144 | 1.04 | 1.05 | 0.98 | 1.04 | 0.98 | 1.10 | 1.05 | 1.13 | 1.09 | 1.11 | 1.09 | 1.09 | 1.02 | 284.99 | 12.03 |
| E9PXC2   | Upstream stimulatory factor 2 OS=Mus musculus GN=Usf2 PE=2 SV=1 - [E9PXC2_MOUSE]                               | 7.44  | 5 | 1  | 1  | 10  | 0.87 | 1.02 | 1.15 | 0.86 | 0.99 | 1.15 | 1.19 | 1.13 | 1.23 | 1.11 | 1.22 | 1.13 | 1.24 | 24.00  | 5.86  |
| Q9JK62   | Potassium channel TASK2 OS=Mus musculus GN=Kcnk5 PE=2 SV=1 - [Q9JK62_MOUSE]                                    | 1.79  | 1 | 1  | 1  | 1   | 1.00 | 1.09 | 1.09 | 0.94 | 0.94 | 1.13 | 1.13 | 1.13 | 1.12 | 1.09 | 1.10 | 1.12 | 1.13 | 55.94  | 6.48  |
| F7BTZ2   | Protein PML (Fragment) OS=Mus musculus GN=Pml PE=4 SV=1 - [F7BTZ2_MOUSE]                                       | 5.54  | 6 | 3  | 3  | 6   | 0.83 | 1.04 | 1.25 | 0.89 | 1.07 | 1.13 | 1.33 | 1.13 | 1.22 | 1.07 | 1.25 | 1.02 | 1.23 | 64.57  | 5.07  |
| Q3TRP8   | Cartilage acidic protein 1 OS=Mus musculus GN=Cep68 PE=2 SV=1 - [Q3TRP8_MOUSE]                                 | 3.63  | 3 | 1  | 1  | 1   | 0.97 | 0.51 | 0.53 | 0.67 | 0.69 | 0.94 | 0.97 | 1.13 | 1.16 | 0.52 | 0.54 | 0.78 | 0.81 | 67.65  | 5.94  |

|        |                                                                                                                            |       |   |    |    |     |      |      |      |      |      |      |      |      |      |      |      |      |      |        |      |
|--------|----------------------------------------------------------------------------------------------------------------------------|-------|---|----|----|-----|------|------|------|------|------|------|------|------|------|------|------|------|------|--------|------|
| P26339 | Chromogranin-A<br>OS=Mus musculus<br>GN=Chga PE=1 SV=1<br>-[CMGA_MOUSE]                                                    | 31.53 | 1 | 10 | 10 | 47  | 1.15 | 0.94 | 0.78 | 0.98 | 0.91 | 1.29 | 1.10 | 1.13 | 0.93 | 1.12 | 1.06 | 0.97 | 0.93 | 51.76  | 4.72 |
| Q9CQM5 | Thioredoxin domain-<br>containing protein 17<br>OS=Mus musculus<br>GN=Txndc17 PE=1<br>SV=1 -<br>[TXD17_MOUSE]              | 32.52 | 1 | 4  | 4  | 9   | 1.16 | 1.06 | 0.89 | 0.91 | 0.82 | 1.18 | 1.13 | 1.13 | 0.90 | 1.14 | 0.96 | 1.25 | 1.10 | 14.01  | 4.77 |
| Q6ZWM4 | N-alpha-<br>acetyltransferase 38,<br>NatC auxiliary subunit<br>OS=Mus musculus<br>GN=Naa38 PE=3<br>SV=3 -<br>[NAA38_MOUSE] | 78.13 | 1 | 5  | 5  | 27  | 1.02 | 0.88 | 0.90 | 0.95 | 0.90 | 1.10 | 1.12 | 1.13 | 1.15 | 1.07 | 1.01 | 1.09 | 1.03 | 10.40  | 4.48 |
| Q8CBC4 | Consortin OS=Mus<br>musculus GN=Cnst<br>PE=1 SV=1 -<br>[CNST_MOUSE]                                                        | 9.42  | 2 | 4  | 4  | 10  | 0.93 | 0.83 | 0.88 | 0.96 | 1.04 | 1.25 | 1.24 | 1.13 | 1.21 | 1.05 | 1.12 | 1.09 | 1.18 | 76.82  | 4.59 |
| Q9YQ0  | Protein NDRG2<br>OS=Mus musculus<br>GN=Ndr2 PE=1<br>SV=1 -<br>[NDRG2_MOUSE]                                                | 69.00 | 1 | 2  | 15 | 126 | 0.90 | 0.96 | 1.02 | 1.20 | 1.26 | 1.29 | 1.57 | 1.13 | 1.30 | 1.10 | 1.18 | 1.09 | 1.13 | 40.76  | 5.40 |
| P97813 | Phospholipase D2<br>OS=Mus musculus<br>GN=Pld2 PE=1 SV=2 -<br>[PLD2_MOUSE]                                                 | 4.07  | 2 | 1  | 1  | 1   | 1.38 | 1.24 | 0.89 | 0.97 | 0.70 | 0.89 | 0.64 | 1.13 | 0.81 | 0.85 | 0.62 | 0.81 | 0.59 | 106.10 | 7.39 |
| A2ALU4 | Protein Shroom2<br>OS=Mus musculus<br>GN=Shroom2 PE=1<br>SV=1 -<br>[SHRM2_MOUSE]                                           | 21.88 | 5 | 23 | 25 | 133 | 1.06 | 0.91 | 0.91 | 0.94 | 0.89 | 1.17 | 1.09 | 1.13 | 1.07 | 1.01 | 0.99 | 1.01 | 0.95 | 164.60 | 6.70 |
| E9Q0W5 | Protein FAM3C<br>(Fragment) OS=Mus<br>musculus GN=Fam3c<br>PE=2 SV=1 -<br>[E9Q0W5_MOUSE]                                   | 41.45 | 6 | 5  | 5  | 9   | 0.95 | 0.98 | 1.02 | 0.98 | 1.09 | 1.10 | 0.99 | 1.13 | 1.14 | 1.10 | 1.03 | 1.02 | 1.03 | 16.51  | 5.15 |
| Q8BJ42 | Disks large-associated<br>protein 2 OS=Mus<br>musculus GN=Dlgap2<br>PE=1 SV=2 -<br>[DLGP2_MOUSE]                           | 25.78 | 3 | 17 | 19 | 62  | 0.94 | 0.95 | 0.98 | 0.97 | 1.08 | 1.07 | 1.12 | 1.13 | 1.20 | 1.00 | 1.07 | 0.97 | 1.07 | 119.00 | 6.81 |
| Q3UFS4 | G patch domain-<br>containing protein 11<br>OS=Mus musculus<br>GN=Gpatch11 PE=2<br>SV=2 -<br>[GPT11_MOUSE]                 | 11.83 | 1 | 3  | 3  | 7   | 1.10 | 0.95 | 0.88 | 0.98 | 0.93 | 1.14 | 1.03 | 1.13 | 1.08 | 1.03 | 1.02 | 1.06 | 0.97 | 30.59  | 5.08 |
| Q99L85 | Elongator complex<br>protein 5 OS=Mus<br>musculus GN=Elp5<br>PE=2 SV=1 -<br>[ELP5_MOUSE]                                   | 21.33 | 1 | 3  | 3  | 6   | 1.05 | 1.08 | 1.60 | 0.97 | 0.93 | 1.17 | 1.35 | 1.13 | 1.28 | 1.05 | 0.90 | 1.01 | 0.99 | 33.48  | 5.49 |
| Q5NCR9 | Nuclear speckle<br>splicing regulatory<br>protein 1 OS=Mus<br>musculus GN=Nsrp1<br>PE=1 SV=1 -<br>[NSRP1_MOUSE]            | 6.09  | 1 | 2  | 2  | 4   | 0.99 | 0.93 | 0.94 | 1.03 | 1.04 | 1.27 | 1.28 | 1.13 | 1.13 | 1.16 | 1.17 | 0.99 | 1.00 | 63.76  | 8.76 |



|          |                                                                                                                        |       |    |    |    |      |      |      |      |      |      |      |      |      |      |      |      |      |      |        |       |
|----------|------------------------------------------------------------------------------------------------------------------------|-------|----|----|----|------|------|------|------|------|------|------|------|------|------|------|------|------|------|--------|-------|
| Q811L6   | Microtubule-associated serine/threonine-protein kinase 4 OS=Mus musculus GN=Mast4 PE=1 SV=3 - [MAST4_MOUSE]            | 4.62  | 16 | 7  | 9  | 17   | 0.98 | 0.92 | 1.07 | 1.07 | 1.11 | 1.08 | 1.15 | 1.13 | 1.28 | 1.02 | 1.11 | 1.10 | 1.04 | 283.83 | 8.62  |
| Q3UGC7   | Eukaryotic translation initiation factor 3 subunit J-A OS=Mus musculus GN=Elf3j1 PE=2 SV=1 - [EIF3JA_MOUSE]            | 52.87 | 2  | 15 | 15 | 80   | 1.00 | 0.94 | 0.97 | 0.94 | 0.93 | 1.11 | 1.16 | 1.13 | 1.12 | 1.07 | 1.06 | 0.97 | 1.01 | 29.33  | 4.81  |
| Q8K1M6   | Dynamin-1-like protein OS=Mus musculus GN=Dnm1l PE=1 SV=2 - [DNM1L_MOUSE]                                              | 53.23 | 3  | 2  | 32 | 91   | 0.89 | 1.19 | 1.35 | 1.25 | 1.31 | 1.00 | 1.02 | 1.13 | 1.23 | 0.98 | 1.10 | 1.17 | 1.36 | 82.61  | 7.05  |
| Q9CQC9   | GTP-binding protein SAR1b OS=Mus musculus GN=Sar1b PE=1 SV=1 - [SAR1B_MOUSE]                                           | 21.72 | 1  | 2  | 3  | 5    | 0.94 | 0.98 | 1.04 | 1.00 | 1.06 | 1.15 | 1.22 | 1.13 | 1.20 | 1.29 | 1.38 | 1.02 | 1.09 | 22.37  | 6.11  |
| Q3TWW8   | Protein Srsf6 OS=Mus musculus GN=Srsf6 PE=2 SV=1 - [Q3TWW8_MOUSE]                                                      | 22.42 | 1  | 6  | 9  | 30   | 1.00 | 0.83 | 0.92 | 0.89 | 0.91 | 1.07 | 1.03 | 1.13 | 1.06 | 0.95 | 0.99 | 0.87 | 0.88 | 39.00  | 11.46 |
| Q6IRU5-2 | Isoform 2 of Clathrin light chain B OS=Mus musculus GN=Cltb - [CLCB_MOUSE]                                             | 40.76 | 3  | 1  | 14 | 114  | 1.04 | 0.80 | 0.77 | 0.93 | 0.90 | 1.22 | 1.16 | 1.13 | 1.08 | 1.04 | 1.00 | 0.84 | 0.81 | 23.16  | 4.68  |
| Q61644   | Protein kinase C and casein kinase substrate in neurons protein 1 OS=Mus musculus GN=Pacsin1 PE=1 SV=1 - [PACN1_MOUSE] | 76.87 | 1  | 35 | 38 | 1045 | 1.00 | 0.87 | 0.88 | 0.90 | 0.89 | 1.13 | 1.13 | 1.13 | 1.12 | 1.02 | 1.01 | 0.95 | 0.96 | 50.54  | 5.24  |
| Q99PV8-3 | Isoform 3 of B-cell lymphoma/leukemia 11B OS=Mus musculus GN=Bcl11b - [BC11B_MOUSE]                                    | 2.17  | 3  | 1  | 1  | 1    | 1.04 | 0.95 | 0.91 | 0.93 | 0.89 | 1.33 | 1.28 | 1.13 | 1.09 | 1.38 | 1.33 | 1.51 | 1.46 | 74.13  | 7.69  |
| Q3UIX4   | Protein Srsf11 OS=Mus musculus GN=Srsf11 PE=2 SV=1 - [Q3UIX4_MOUSE]                                                    | 11.34 | 8  | 4  | 4  | 13   | 1.08 | 1.05 | 1.07 | 0.95 | 0.97 | 1.19 | 1.14 | 1.13 | 1.06 | 1.02 | 1.02 | 1.17 | 1.26 | 53.07  | 10.58 |
| O55042-2 | Isoform 2 of Alpha-synuclein OS=Mus musculus GN=SncA - [SYUA_MOUSE]                                                    | 76.03 | 2  | 11 | 15 | 767  | 1.04 | 0.80 | 0.80 | 0.93 | 0.91 | 1.15 | 1.11 | 1.13 | 1.10 | 1.08 | 1.03 | 1.00 | 0.99 | 12.34  | 9.20  |
| F60840-2 | Isoform 2 of Alpha-endosulfine OS=Mus musculus GN=Ensa - [ENSA_MOUSE]                                                  | 74.36 | 3  | 9  | 10 | 134  | 1.03 | 0.97 | 0.93 | 0.94 | 0.92 | 1.12 | 1.12 | 1.13 | 1.11 | 1.04 | 1.03 | 0.96 | 0.98 | 12.91  | 8.27  |
| P70174   | Histamine H1 receptor OS=Mus musculus GN=Hrh1 PE=2 SV=2 - [HRH1_MOUSE]                                                 | 4.71  | 1  | 2  | 2  | 3    | 1.09 | 1.42 | 1.30 | 1.07 | 0.98 | 1.10 | 1.00 | 1.13 | 1.03 | 1.18 | 1.08 | 1.21 | 1.11 | 55.65  | 9.32  |
| E9Q9K8   | Protein Akap6 OS=Mus musculus GN=Akap6 PE=2 SV=1 - [E9Q9K8_MOUSE]                                                      | 0.74  | 1  | 1  | 1  | 2    | 0.92 | 0.73 | 0.79 | 0.84 | 0.91 | 1.09 | 1.18 | 1.13 | 1.22 | 0.94 | 1.02 | 0.66 | 0.72 | 254.17 | 5.06  |

|          |                                                                                                                    |       |   |    |    |     |      |      |      |      |      |      |      |      |      |      |      |      |      |        |      |
|----------|--------------------------------------------------------------------------------------------------------------------|-------|---|----|----|-----|------|------|------|------|------|------|------|------|------|------|------|------|------|--------|------|
| Q7TMF3   | NADH dehydrogenase [ubiquinone] 1 alpha subcomplex subunit 12 OS=Mus musculus GN=Ndufa12 PE=1 SV=2 - [NDUAC_MOUSE] | 79.31 | 2 | 9  | 9  | 35  | 1.05 | 0.99 | 0.93 | 1.07 | 1.08 | 1.06 | 1.01 | 1.13 | 1.13 | 1.07 | 1.00 | 1.15 | 1.10 | 17.08  | 9.36 |
| Q9CWE0   | Mitochondrial fission regulator 1-like OS=Mus musculus GN=Mtrf11 PE=1 SV=1 - [MFR1L_MOUSE]                         | 44.64 | 5 | 10 | 10 | 34  | 0.99 | 0.85 | 0.83 | 0.92 | 0.96 | 1.05 | 1.05 | 1.13 | 1.17 | 0.92 | 1.05 | 1.04 | 1.02 | 31.71  | 6.10 |
| P17751   | Triosephosphate isomerase OS=Mus musculus GN=Tpi1 PE=1 SV=4 - [TPIS_MOUSE]                                         | 68.56 | 2 | 23 | 23 | 763 | 0.95 | 0.79 | 0.84 | 0.89 | 0.93 | 1.08 | 1.15 | 1.13 | 1.19 | 0.98 | 1.05 | 0.96 | 1.01 | 32.17  | 5.74 |
| G3X9S1   | Protein FAM13C OS=Mus musculus GN=Fam13c PE=4 SV=1 - [G3X9S1_MOUSE]                                                | 22.74 | 4 | 9  | 10 | 15  | 1.06 | 1.00 | 0.87 | 0.95 | 0.88 | 1.10 | 1.06 | 1.13 | 1.09 | 1.03 | 1.04 | 1.09 | 1.03 | 57.87  | 6.73 |
| Q6P1B9   | Bin1 protein OS=Mus musculus GN=Bin1 PE=2 SV=1 - [Q6P1B9_MOUSE]                                                    | 63.94 | 2 | 1  | 28 | 605 | 0.97 | 0.78 | 0.85 | 0.90 | 0.93 | 1.07 | 1.19 | 1.13 | 1.16 | 0.93 | 0.95 | 0.89 | 1.00 | 52.73  | 5.24 |
| B9EKI3   | TATA element modulatory factor OS=Mus musculus GN=Tmf1 PE=1 SV=2 - [TMF1_MOUSE]                                    | 20.16 | 2 | 19 | 19 | 34  | 1.01 | 1.02 | 0.96 | 0.90 | 0.94 | 1.05 | 1.07 | 1.13 | 1.15 | 1.00 | 1.01 | 0.92 | 0.93 | 121.73 | 4.87 |
| Q9D385-2 | Isoform 2 of ADP-ribosylation factor-like protein 2-binding protein OS=Mus musculus GN=Ar12bp - [AR2BP_MOUSE]      | 23.68 | 2 | 3  | 3  | 7   | 1.08 | 0.94 | 0.95 | 0.93 | 0.96 | 1.03 | 1.02 | 1.13 | 1.16 | 1.00 | 0.98 | 1.04 | 1.07 | 17.56  | 4.50 |
| Q6PEI3   | Proline-rich transmembrane protein 3 OS=Mus musculus GN=Prrt3 PE=1 SV=1 - [PRRT3_MOUSE]                            | 23.89 | 1 | 12 | 12 | 47  | 1.06 | 1.12 | 1.08 | 1.13 | 1.09 | 1.16 | 1.11 | 1.13 | 1.14 | 1.13 | 1.16 | 1.07 | 1.04 | 101.16 | 7.52 |
| Q99JB8   | Protein kinase C and casein kinase II substrate protein 3 OS=Mus musculus GN=Pacsin3 PE=1 SV=1 - [PACN3_MOUSE]     | 36.79 | 8 | 10 | 10 | 37  | 0.89 | 1.00 | 1.12 | 0.94 | 1.00 | 1.15 | 1.24 | 1.13 | 1.35 | 1.05 | 1.19 | 0.97 | 1.03 | 48.55  | 6.10 |
| Q62356   | Follistatin-related protein 1 OS=Mus musculus GN=Fstl1 PE=1 SV=2 - [FSTL1_MOUSE]                                   | 8.50  | 1 | 2  | 2  | 3   | 0.99 | 1.12 | 1.14 | 0.92 | 0.94 | 1.06 | 1.07 | 1.13 | 1.14 | 0.99 | 1.00 | 0.97 | 0.98 | 34.53  | 5.85 |
| Q8BL97-3 | Isoform 3 of Serine/arginine-rich splicing factor 7 OS=Mus musculus GN=Srsf7 - [SRSF7_MOUSE]                       | 52.23 | 4 | 9  | 10 | 47  | 1.04 | 1.05 | 0.92 | 0.95 | 0.93 | 1.03 | 1.01 | 1.13 | 1.05 | 1.04 | 0.94 | 0.98 | 1.00 | 17.88  | 9.47 |

|        |                                                                                                                             |       |   |    |    |     |      |      |      |      |      |      |      |      |      |      |      |      |      |        |      |
|--------|-----------------------------------------------------------------------------------------------------------------------------|-------|---|----|----|-----|------|------|------|------|------|------|------|------|------|------|------|------|------|--------|------|
| Q9D0W5 | Peptidyl-prolyl cis-trans isomerase-like 1 OS=Mus musculus GN=Ppil1 PE=2 SV=1 [PPIL1_MOUSE]                                 | 31.33 | 1 | 4  | 4  | 10  | 1.04 | 1.19 | 1.04 | 1.06 | 0.99 | 1.08 | 1.06 | 1.13 | 1.07 | 1.11 | 1.06 | 1.14 | 1.05 | 18.23  | 7.99 |
| Q8BL66 | Early endosome antigen 1 OS=Mus musculus GN=Eea1 PE=1 SV=2 - [EEA1_MOUSE]                                                   | 59.39 | 1 | 80 | 80 | 349 | 1.05 | 0.84 | 0.81 | 0.93 | 0.89 | 1.17 | 1.09 | 1.13 | 1.06 | 1.03 | 0.98 | 0.96 | 0.92 | 160.82 | 5.77 |
| D3Z7B8 | Collagen alpha-1(XIII) chain OS=Mus musculus GN=Col13a1 PE=2 SV=1 - [D3Z7B8_MOUSE]                                          | 2.22  | 2 | 1  | 1  | 2   | 1.03 | 0.83 | 0.80 | 0.92 | 0.89 | 1.03 | 0.99 | 1.13 | 1.09 | 1.08 | 1.05 | 1.01 | 0.98 | 65.58  | 9.00 |
| A2A7H6 | F-box only protein 44 OS=Mus musculus GN=Fbxo44 PE=4 SV=1 - [A2A7H6_MOUSE]                                                  | 6.70  | 1 | 1  | 1  | 1   | 0.90 | 0.81 | 0.91 | 0.96 | 1.07 | 1.13 | 1.26 | 1.13 | 1.26 | 1.17 | 1.31 | 1.04 | 1.16 | 25.68  | 7.80 |
| F6V8Y6 | Amyloid beta A4 precursor protein-binding family B member 2 (Fragment) OS=Mus musculus GN=Apb2 PE=4 SV=1 - [F6V8Y6_MOUSE]   | 5.76  | 4 | 1  | 1  | 1   | 1.15 | 1.48 | 1.29 | 1.05 | 0.92 | 1.83 | 1.59 | 1.13 | 0.98 | 1.13 | 0.99 | 1.17 | 1.02 | 26.60  | 5.02 |
| Q9JM13 | Rab5 GDP/GTP exchange factor OS=Mus musculus GN=Rabgef1 PE=1 SV=1 - [RABX5_MOUSE]                                           | 17.72 | 3 | 8  | 8  | 20  | 0.92 | 0.79 | 0.89 | 0.94 | 1.03 | 1.08 | 1.20 | 1.13 | 1.21 | 1.06 | 1.15 | 0.99 | 1.06 | 56.83  | 6.79 |
| Q8VDS4 | Regulation of nuclear pre-mRNA domain-containing protein 1A OS=Mus musculus GN=Rprd1a PE=2 SV=1 - [RPR1A_MOUSE]             | 5.13  | 1 | 1  | 1  | 2   | 0.96 | 0.82 | 0.85 | 1.03 | 1.07 | 0.97 | 1.00 | 1.13 | 1.17 | 1.05 | 1.09 | 1.13 | 1.18 | 35.68  | 7.58 |
| Q9Z0F7 | Gamma-synuclein OS=Mus musculus GN=Sncg PE=1 SV=1 - [SYUG_MOUSE]                                                            | 76.42 | 1 | 8  | 9  | 50  | 1.32 | 0.98 | 0.69 | 0.95 | 0.71 | 1.14 | 0.84 | 1.13 | 0.88 | 1.45 | 1.09 | 1.25 | 0.93 | 13.15  | 4.65 |
| P61082 | NEDD8-conjugating enzyme Ubc12 OS=Mus musculus GN=Ubc2m PE=2 SV=1 - [UBC12_MOUSE]                                           | 40.44 | 5 | 7  | 7  | 18  | 0.94 | 1.09 | 1.12 | 0.99 | 1.07 | 1.13 | 1.19 | 1.13 | 1.24 | 1.11 | 1.12 | 1.10 | 1.14 | 20.89  | 7.69 |
| F8WHU8 | SRA stem-loop-interacting RNA-binding protein, mitochondrial (Fragment) OS=Mus musculus GN=Slirp PE=2 SV=1 - [F8WHU8_MOUSE] | 61.76 | 4 | 4  | 4  | 11  | 0.96 | 0.85 | 0.90 | 0.91 | 1.01 | 1.13 | 1.24 | 1.13 | 1.33 | 1.09 | 1.30 | 0.92 | 1.12 | 11.44  | 9.41 |
| Q02819 | Nucleobindin-1 OS=Mus musculus GN=Nuch1 PE=1 SV=2 - [NUCB1_MOUSE]                                                           | 66.88 | 4 | 31 | 31 | 169 | 1.04 | 0.96 | 0.94 | 0.93 | 0.89 | 1.12 | 1.10 | 1.13 | 1.08 | 1.05 | 1.02 | 0.99 | 0.95 | 53.38  | 5.07 |

|          |                                                                                                                                  |       |    |    |    |     |      |      |      |      |      |      |      |      |      |      |      |      |      |        |      |
|----------|----------------------------------------------------------------------------------------------------------------------------------|-------|----|----|----|-----|------|------|------|------|------|------|------|------|------|------|------|------|------|--------|------|
| Q3UN02   | Lysocardiolipin acyltransferase 1<br>OS=Mus musculus<br>GN=Lclat1 PE=2<br>SV=2 -<br>[LCLT1_MOUSE]                                | 5.05  | 1  | 2  | 2  | 3   | 0.93 | 1.26 | 1.59 | 1.27 | 1.36 | 0.88 | 0.94 | 1.13 | 1.43 | 0.87 | 0.93 | 1.05 | 1.12 | 44.37  | 8.53 |
| J3QPS8   | Eukaryotic translation initiation factor 5A-1<br>OS=Mus musculus<br>GN=Elf5a PE=4 SV=1<br>- [J3QPS8_MOUSE]                       | 88.16 | 1  | 6  | 6  | 157 | 1.05 | 1.07 | 1.00 | 0.85 | 0.84 | 1.04 | 1.05 | 1.13 | 1.04 | 1.05 | 1.00 | 1.00 | 0.97 | 8.43   | 4.41 |
| Q62418-3 | Isoform 3 of Drebrin-like protein OS=Mus musculus GN=Dbnl - [DBNL_MOUSE]                                                         | 51.39 | 3  | 17 | 17 | 189 | 1.01 | 0.90 | 0.91 | 0.90 | 0.90 | 1.15 | 1.14 | 1.13 | 1.13 | 1.07 | 1.05 | 1.01 | 1.00 | 48.31  | 4.92 |
| Q61475   | Complement decay-accelerating factor, GPI anchored OS=Mus musculus GN=Cd55 PE=2 SV=2 - [DAF1_MOUSE]                              | 3.08  | 1  | 1  | 1  | 2   | 0.95 | 0.89 | 0.93 | 1.00 | 1.05 | 1.02 | 1.07 | 1.13 | 1.18 | 1.15 | 1.21 | 1.15 | 1.21 | 42.59  | 8.40 |
| Q9Z0H8   | CAP-Gly domain-containing linker protein 2 OS=Mus musculus GN=Clip2 PE=1 SV=2 - [CLIP2_MOUSE]                                    | 60.17 | 2  | 49 | 59 | 323 | 1.01 | 0.91 | 0.93 | 0.91 | 0.92 | 1.14 | 1.13 | 1.13 | 1.13 | 1.02 | 1.01 | 0.93 | 0.91 | 115.84 | 6.48 |
| B7ZCR6   | Protein ZnF512b OS=Mus musculus GN=ZnF512b PE=2 SV=1 - [B7ZCR6_MOUSE]                                                            | 5.87  | 3  | 3  | 3  | 5   | 0.95 | 0.93 | 0.98 | 1.08 | 1.08 | 1.08 | 1.13 | 1.13 | 1.19 | 1.31 | 1.38 | 1.14 | 1.14 | 95.27  | 9.77 |
| Q9WTX2   | Interferon-inducible double stranded RNA-dependent protein kinase activator A OS=Mus musculus GN=Prkra PE=1 SV=1 - [PRKRA_MOUSE] | 10.54 | 1  | 3  | 3  | 6   | 0.84 | 0.93 | 0.95 | 0.84 | 0.95 | 1.03 | 1.16 | 1.13 | 1.33 | 1.12 | 1.15 | 1.07 | 1.26 | 34.35  | 8.43 |
| Q8CH25-  | Isoform 2 of SAFB-like transcription modulator OS=Mus musculus GN=Sltm - [SLTM_MOUSE]                                            | 18.56 | 2  | 17 | 17 | 43  | 1.01 | 0.89 | 0.91 | 0.96 | 1.00 | 1.10 | 1.09 | 1.13 | 1.17 | 0.99 | 1.00 | 0.96 | 0.95 | 115.11 | 8.05 |
| Q61017   | Guanine nucleotide-binding protein G(I)/G(S)/G(O) subunit gamma-T2 OS=Mus musculus GN=Gngt2 PE=2 SV=2 - [GBGT2_MOUSE]            | 10.14 | 1  | 1  | 1  | 2   | 1.22 | 0.87 | 0.72 | 1.04 | 0.85 | 1.08 | 0.88 | 1.13 | 0.93 | 1.14 | 0.93 | 1.11 | 0.91 | 7.80   | 5.52 |
| Q9WU56-  | Isoform 4 of tRNA pseudouridine synthase A, mitochondrial OS=Mus musculus GN=Pus1 - [TRUA_MOUSE]                                 | 3.75  | 5  | 1  | 1  | 2   | 1.10 | 2.34 | 2.12 | 0.99 | 0.90 | 1.14 | 1.03 | 1.13 | 1.02 | 0.93 | 0.85 | 1.07 | 0.97 | 38.90  | 8.13 |
| Q8VC91   | Ikbkg protein OS=Mus musculus GN=Ikbkg PE=2 SV=1 - [Q8VC91_MOUSE]                                                                | 22.38 | 12 | 7  | 8  | 15  | 0.95 | 0.97 | 0.97 | 0.95 | 0.91 | 1.09 | 1.10 | 1.13 | 1.17 | 1.03 | 1.03 | 0.99 | 0.95 | 47.81  | 5.85 |

|          |                                                                                                                          |       |   |    |    |      |      |      |      |      |      |      |      |      |      |      |      |      |      |        |      |
|----------|--------------------------------------------------------------------------------------------------------------------------|-------|---|----|----|------|------|------|------|------|------|------|------|------|------|------|------|------|------|--------|------|
| Q9QYC0   | Isoform 2 of Alpha-adducin OS=Mus musculus GN=Add1 - [ADDA_MOUSE]                                                        | 54.75 | 6 | 1  | 25 | 222  | 1.20 | 0.93 | 0.78 | 0.92 | 0.76 | 1.09 | 0.91 | 1.13 | 0.94 | 1.06 | 0.88 | 1.15 | 0.96 | 69.84  | 6.51 |
| Q8R326   | Paraspeckle component 1 OS=Mus musculus GN=Pspc1 PE=1 SV=1 - [PSPC1_MOUSE]                                               | 46.27 | 3 | 17 | 17 | 52   | 0.97 | 0.94 | 0.95 | 0.91 | 0.93 | 1.04 | 1.08 | 1.13 | 1.20 | 0.89 | 0.96 | 0.91 | 0.96 | 58.72  | 6.67 |
| Q6NZL0   | Protein SOGA3 OS=Mus musculus GN=Soga3 PE=2 SV=2 - [SOGA3_MOUSE]                                                         | 31.96 | 1 | 25 | 26 | 75   | 1.01 | 1.07 | 1.11 | 1.07 | 1.04 | 1.06 | 1.08 | 1.13 | 1.13 | 1.08 | 1.07 | 1.06 | 1.09 | 103.42 | 6.14 |
| O88878   | AN1-type zinc finger protein 5 OS=Mus musculus GN=Zfand5 PE=1 SV=1 - [ZFAN5_MOUSE]                                       | 24.41 | 3 | 2  | 3  | 7    | 1.01 | 1.23 | 1.27 | 0.88 | 0.89 | 1.32 | 1.30 | 1.13 | 1.12 | 1.11 | 1.15 | 1.21 | 1.24 | 23.04  | 8.51 |
| Q9EQT6   | Synaptotagmin-13 OS=Mus musculus GN=Sytl3 PE=1 SV=1 - [SYT13_MOUSE]                                                      | 3.52  | 1 | 1  | 1  | 2    | 1.01 | 1.10 | 1.08 | 1.21 | 1.19 | 1.32 | 1.30 | 1.13 | 1.11 | 1.29 | 1.27 | 1.03 | 1.02 | 46.84  | 7.53 |
| Q9QY0    | GRB2-associated-binding protein 1 OS=Mus musculus GN=Gab1 PE=1 SV=2 - [GAB1_MOUSE]                                       | 21.15 | 1 | 11 | 11 | 25   | 0.97 | 0.98 | 1.03 | 0.91 | 0.90 | 1.10 | 1.12 | 1.13 | 1.12 | 1.08 | 1.07 | 1.08 | 1.14 | 76.76  | 5.67 |
| Q3UFY8   | Mitochondrial ribonuclease P protein 1 OS=Mus musculus GN=Trmt10c PE=2 SV=2 - [MRRP1_MOUSE]                              | 7.73  | 1 | 2  | 2  | 3    | 1.08 | 0.93 | 0.85 | 0.91 | 0.84 | 1.00 | 0.92 | 1.13 | 1.04 | 0.93 | 0.86 | 1.09 | 1.00 | 48.36  | 9.38 |
| Q9R0P9   | Ubiquitin carboxyl-terminal hydrolase isozyme L1 OS=Mus musculus GN=Uchl1 PE=1 SV=1 - [UCHL1_MOUSE]                      | 94.17 | 5 | 19 | 20 | 1749 | 0.96 | 0.75 | 0.78 | 0.88 | 0.91 | 1.10 | 1.13 | 1.13 | 1.17 | 1.04 | 1.08 | 0.98 | 1.02 | 24.82  | 5.24 |
| E9Q0S6   | Protein Tns1 OS=Mus musculus GN=Tns1 PE=2 SV=1 - [E9Q0S6_MOUSE]                                                          | 9.59  | 1 | 10 | 11 | 24   | 0.94 | 1.00 | 0.98 | 0.90 | 1.00 | 1.03 | 1.11 | 1.13 | 1.20 | 1.03 | 1.11 | 0.98 | 1.15 | 201.26 | 7.75 |
| Q9CU62   | Structural maintenance of chromosomes protein 1A OS=Mus musculus GN=Smc1a PE=1 SV=4 - [SMC1A_MOUSE]                      | 5.11  | 1 | 5  | 5  | 9    | 1.02 | 0.82 | 0.90 | 0.92 | 0.89 | 1.09 | 1.06 | 1.13 | 1.10 | 1.10 | 1.08 | 1.10 | 1.10 | 143.15 | 7.64 |
| O35711-4 | Isoform 4 of Liprin-beta-2 OS=Mus musculus GN=Ppfbp2 [LIPB2_MOUSE]                                                       | 5.20  | 4 | 2  | 2  | 3    | 1.09 | 1.23 | 1.13 | 0.96 | 0.88 | 1.31 | 1.19 | 1.13 | 1.03 | 1.50 | 1.38 | 1.62 | 1.49 | 101.08 | 6.15 |
| P52503   | NADH dehydrogenase [ubiquinone] iron-sulfur protein 6, mitochondrial OS=Mus musculus GN=Ndufs6 PE=1 SV=2 - [NDUS6_MOUSE] | 64.66 | 2 | 8  | 8  | 399  | 1.01 | 0.91 | 0.97 | 0.93 | 0.96 | 1.12 | 1.13 | 1.13 | 1.13 | 1.05 | 1.05 | 0.97 | 1.00 | 13.01  | 8.65 |

|          |                                                                                                                          |       |   |    |    |     |      |      |      |      |      |      |      |      |      |      |      |      |      |        |      |
|----------|--------------------------------------------------------------------------------------------------------------------------|-------|---|----|----|-----|------|------|------|------|------|------|------|------|------|------|------|------|------|--------|------|
| P49586   | Choline-phosphate<br>cytidyltransferase A<br>OS=Mus musculus<br>GN=Pcyt1a PE=1<br>SV=1 -<br>[PCY1A_MOUSE]                | 11.17 | 2 | 2  | 3  | 5   | 0.97 | 1.29 | 1.33 | 0.97 | 1.00 | 1.03 | 1.06 | 1.13 | 1.17 | 0.94 | 0.97 | 0.95 | 0.98 | 41.64  | 7.03 |
| F8VPR5   | CREB-binding protein<br>OS=Mus musculus<br>GN=Crebbp PE=2<br>SV=1 -<br>[F8VPR5_MOUSE]                                    | 4.01  | 2 | 4  | 6  | 11  | 0.98 | 1.14 | 1.18 | 0.95 | 0.87 | 1.20 | 1.05 | 1.13 | 1.09 | 1.19 | 1.09 | 1.19 | 1.19 | 265.40 | 8.50 |
| Q03517   | Secretogranin-2<br>OS=Mus musculus<br>GN=Scg2 PE=1 SV=1 -<br>[SCG2_MOUSE]                                                | 56.73 | 1 | 31 | 31 | 213 | 1.58 | 0.95 | 0.62 | 0.91 | 0.56 | 1.15 | 0.72 | 1.13 | 0.70 | 1.41 | 0.92 | 1.46 | 0.91 | 70.60  | 4.75 |
| Q8VHL1   | Histone-lysine N-<br>methyltransferase<br>SETD7 OS=Mus<br>musculus GN=Setd7<br>PE=2 SV=2 -<br>[SETD7_MOUSE]              | 57.92 | 1 | 14 | 14 | 191 | 0.93 | 0.87 | 0.97 | 0.86 | 0.91 | 1.13 | 1.25 | 1.13 | 1.20 | 0.99 | 1.10 | 0.91 | 1.00 | 40.48  | 4.65 |
| Q9CYG7   | Mitochondrial import<br>receptor subunit<br>TOM34 OS=Mus<br>musculus<br>GN=Tom34 PE=2<br>SV=1 -<br>[TOM34_MOUSE]         | 36.25 | 1 | 1  | 7  | 22  | 0.86 | 1.04 | 1.20 | 0.93 | 1.07 | 1.00 | 1.15 | 1.13 | 1.31 | 1.13 | 1.30 | 1.01 | 1.17 | 34.26  | 9.14 |
| Q8K039   | Uncharacterized<br>protein KIAA1143<br>homolog OS=Mus<br>musculus PE=1 SV=1 -<br>[K1143_MOUSE]                           | 33.55 | 1 | 4  | 4  | 9   | 1.06 | 0.87 | 0.81 | 0.88 | 1.01 | 1.03 | 1.02 | 1.13 | 0.94 | 1.04 | 0.97 | 0.83 | 1.11 | 17.47  | 8.48 |
| E9PWR7   | Ecotropic viral<br>integration site 5<br>protein (Fragment)<br>OS=Mus musculus<br>GN=Evis5 PE=2 SV=1 -<br>[E9PWR7_MOUSE] | 2.42  | 3 | 1  | 1  | 2   | 1.10 | 1.08 | 0.98 | 1.14 | 1.04 | 0.93 | 0.84 | 1.13 | 1.03 | 1.23 | 1.12 | 1.22 | 1.11 | 76.58  | 7.20 |
| Q791N7   | DNA-directed RNA<br>polymerase I subunit<br>RPA12 OS=Mus<br>musculus GN=Zard1<br>PE=2 SV=1 -<br>[RPA12_MOUSE]            | 17.89 | 1 | 1  | 1  | 2   | 0.91 | 1.08 | 1.18 | 0.80 | 0.88 | 0.99 | 1.09 | 1.13 | 1.24 | 0.96 | 1.06 | 0.88 | 0.96 | 13.64  | 5.27 |
| Q8C4B4   | Protein unc-119<br>homolog B OS=Mus<br>musculus<br>GN=Unc119b PE=2<br>SV=1 -<br>[U119B_MOUSE]                            | 7.97  | 1 | 2  | 2  | 2   | 1.08 | 1.18 | 1.08 | 1.12 | 1.04 | 1.13 | 1.04 | 1.13 | 1.04 | 1.13 | 1.04 | 1.22 | 1.13 | 28.29  | 5.72 |
| A2BH40   | AT-rich interactive<br>domain-containing<br>protein 1A OS=Mus<br>musculus GN=Arid1a<br>PE=1 SV=1 -<br>[AR1A_MOUSE]       | 6.66  | 5 | 8  | 8  | 18  | 1.02 | 0.88 | 0.96 | 0.99 | 0.99 | 1.10 | 1.09 | 1.13 | 1.08 | 0.96 | 0.97 | 1.03 | 1.10 | 241.94 | 6.68 |
| B8JJ4    | Vesicle transport<br>protein SEC20<br>OS=Mus musculus<br>GN=Bnip1 PE=2<br>SV=1 -<br>[B8JJ4_MOUSE]                        | 5.15  | 2 | 1  | 1  | 1   | 1.09 | 1.36 | 1.25 | 1.12 | 1.02 | 0.96 | 0.87 | 1.13 | 1.03 | 1.16 | 1.06 | 1.27 | 1.16 | 22.38  | 8.70 |
| Q99PG2-2 | Isoform 2 of Opioid<br>growth factor receptor<br>OS=Mus musculus<br>GN=Ogfr -<br>[OGFR_MOUSE]                            | 32.83 | 2 | 9  | 9  | 17  | 1.00 | 1.00 | 1.08 | 0.97 | 0.99 | 1.13 | 1.14 | 1.13 | 1.15 | 1.21 | 1.18 | 1.11 | 1.13 | 66.70  | 4.84 |

|          |                                                                                                          |       |     |    |    |     |      |      |      |      |      |      |      |      |      |      |      |      |      |        |      |
|----------|----------------------------------------------------------------------------------------------------------|-------|-----|----|----|-----|------|------|------|------|------|------|------|------|------|------|------|------|------|--------|------|
| Q9CU65   | Zinc finger MYM-type protein 2 OS=Mus musculus GN=Zmym2 PE=2 SV=3 - [ZMYM2_MOUSE]                        | 0.94  | 1   | 1  | 1  | 2   | 0.99 | 1.11 | 1.12 | 0.94 | 0.95 | 1.18 | 1.18 | 1.13 | 1.14 | 1.11 | 1.12 | 1.18 | 1.20 | 154.54 | 6.37 |
| Q9D8Y8   | Isoform 3 of Inhibitor of growth protein 5 OS=Mus musculus GN=Ing5 - [ING5_MOUSE]                        | 7.79  | 3   | 1  | 1  | 3   | 1.16 | 1.44 | 1.24 | 0.95 | 0.82 | 1.22 | 1.05 | 1.13 | 0.97 | 0.95 | 0.82 | 0.98 | 0.84 | 17.78  | 8.53 |
| E9PUL5   | Proline-rich transmembrane protein 2 OS=Mus musculus GN=Prrt2 PE=1 SV=1 - [PRRT2_MOUSE]                  | 42.77 | 1   | 8  | 8  | 87  | 0.99 | 0.97 | 0.95 | 0.95 | 0.93 | 1.17 | 1.10 | 1.13 | 1.21 | 1.04 | 1.01 | 0.97 | 0.96 | 35.90  | 4.63 |
| Q8BFW7   | Lipoma-preferred partner homolog OS=Mus musculus GN=Lpp PE=1 SV=1 - [LPP_MOUSE]                          | 46.82 | 5   | 15 | 15 | 64  | 1.03 | 0.90 | 0.85 | 0.96 | 0.93 | 1.09 | 1.10 | 1.13 | 1.09 | 1.12 | 1.13 | 1.04 | 1.01 | 65.85  | 7.37 |
| Q8C2S5-3 | Isoform 3 of F-box/LRR-repeat protein 5 OS=Mus musculus GN=Fbxl5 - [FBXL5_MOUSE]                         | 1.77  | 4   | 1  | 1  | 3   | 0.96 | 1.23 | 1.19 | 0.98 | 0.98 | 0.95 | 0.98 | 1.13 | 1.02 | 0.95 | 1.01 | 1.20 | 1.22 | 70.88  | 5.34 |
| P99027   | 60S acidic ribosomal protein P2 OS=Mus musculus GN=Rplp2 PE=1 SV=3 - [RLA2_MOUSE]                        | 93.91 | 1   | 10 | 10 | 152 | 1.02 | 0.90 | 0.91 | 0.90 | 0.91 | 1.09 | 1.13 | 1.13 | 1.06 | 1.03 | 0.99 | 0.94 | 0.98 | 11.64  | 4.54 |
| P63147   | Ubiquitin-conjugating enzyme E2 B OS=Mus musculus GN=Ube2b PE=1 SV=1 - [UBE2B_MOUSE]                     | 11.18 | 1   | 1  | 1  | 5   | 1.01 | 1.02 | 1.00 | 0.81 | 0.89 | 0.82 | 0.85 | 1.13 | 1.06 | 0.84 | 0.99 | 0.77 | 0.81 | 17.30  | 5.01 |
| Q9CRC3   | UPF0235 protein C15orf40 homolog OS=Mus musculus PE=2 SV=1 - [CO040_MOUSE]                               | 30.16 | 1   | 3  | 3  | 7   | 1.18 | 0.81 | 0.67 | 0.96 | 0.82 | 1.19 | 1.01 | 1.13 | 0.96 | 1.22 | 1.01 | 1.09 | 0.90 | 13.18  | 9.16 |
| Q8K0Z7   | Translational activator of cytochrome c oxidase 1 OS=Mus musculus GN=Taco1 PE=2 SV=1 - [TACO1_MOUSE]     | 13.61 | 1   | 3  | 3  | 7   | 1.02 | 0.78 | 0.81 | 1.03 | 1.04 | 1.14 | 1.16 | 1.13 | 1.24 | 1.04 | 1.14 | 1.02 | 1.07 | 32.29  | 8.12 |
| P34022   | Ran-specific GTPase-activating protein OS=Mus musculus GN=Ranbp1 PE=1 SV=2 - [RANG_MOUSE]                | 64.04 | 2   | 8  | 8  | 97  | 1.05 | 0.81 | 0.83 | 0.97 | 0.90 | 1.17 | 1.13 | 1.13 | 1.13 | 1.04 | 1.02 | 1.02 | 0.97 | 23.58  | 5.22 |
| P17141   | Zinc finger protein 37 OS=Mus musculus GN=Zfp37 PE=2 SV=4 - [ZFP37_MOUSE]                                | 10.94 | 152 | 4  | 5  | 10  | 0.97 | 1.07 | 1.05 | 1.02 | 1.02 | 1.18 | 1.16 | 1.13 | 1.02 | 1.18 | 1.18 | 1.14 | 0.99 | 67.18  | 8.82 |
| Q8K135   | Dyslexia-associated protein KIAA0319-like protein OS=Mus musculus GN=Kiaa0319l PE=1 SV=1 - [K319L_MOUSE] | 3.34  | 2   | 3  | 3  | 4   | 0.98 | 1.44 | 1.68 | 1.12 | 1.14 | 1.02 | 1.08 | 1.13 | 1.00 | 1.11 | 1.05 | 1.00 | 0.98 | 115.24 | 6.16 |

|        |                                                                                                                               |       |   |   |    |    |      |      |      |      |      |      |      |      |      |      |      |      |      |       |       |
|--------|-------------------------------------------------------------------------------------------------------------------------------|-------|---|---|----|----|------|------|------|------|------|------|------|------|------|------|------|------|------|-------|-------|
| D3Z7B7 | Protein<br>4632428N05Rik<br>OS=Mus musculus<br>GN=4632428N05Rik<br>PE=2 SV=1 -<br>[D3Z7B7_MOUSE]                              | 4.85  | 3 | 1 | 1  | 6  | 1.01 | 1.04 | 1.10 | 0.89 | 0.93 | 1.09 | 1.07 | 1.13 | 1.12 | 1.09 | 1.08 | 1.11 | 1.07 | 24.85 | 6.95  |
| P32300 | Delta-type opioid<br>receptor OS=Mus<br>musculus GN=Oprd1<br>PE=1 SV=1 -<br>[OPRD_MOUSE]                                      | 4.30  | 1 | 1 | 1  | 1  | 1.11 | 1.48 | 1.32 | 0.89 | 0.80 | 1.08 | 0.96 | 1.13 | 1.01 | 1.10 | 0.99 | 1.06 | 0.95 | 40.53 | 9.22  |
| Q9D6J3 | Coiled-coil domain-<br>containing protein 94<br>OS=Mus musculus<br>GN=Ccd94 PE=1<br>SV=1 -<br>[CCD94_MOUSE]                   | 20.06 | 1 | 4 | 5  | 12 | 1.15 | 0.81 | 0.89 | 0.93 | 0.77 | 1.17 | 1.23 | 1.13 | 1.00 | 1.11 | 0.97 | 1.11 | 0.97 | 35.97 | 6.07  |
| Q9D1Q1 | M-phase<br>phosphoprotein 6<br>OS=Mus musculus<br>GN=Mphosph6 PE=1<br>SV=1 -<br>[MPH6_MOUSE]                                  | 7.45  | 1 | 1 | 1  | 10 | 1.13 | 1.41 | 1.22 | 0.96 | 0.93 | 1.13 | 1.02 | 1.13 | 1.08 | 1.06 | 1.02 | 0.94 | 0.96 | 19.07 | 5.30  |
| P16254 | Signal recognition<br>particle 14 kDa protein<br>OS=Mus musculus<br>GN=Srp14 PE=1<br>SV=1 -<br>[SRP14_MOUSE]                  | 20.00 | 2 | 2 | 2  | 6  | 1.04 | 0.95 | 1.09 | 1.06 | 1.02 | 1.12 | 1.05 | 1.13 | 1.09 | 1.08 | 1.04 | 1.19 | 1.17 | 12.50 | 10.17 |
| P84228 | Histone H3.2 OS=Mus<br>musculus<br>GN=Hist1h3b PE=1<br>SV=2 -<br>[H32_MOUSE]                                                  | 59.56 | 2 | 2 | 9  | 61 | 1.21 | 1.31 | 1.08 | 0.93 | 0.77 | 1.07 | 0.92 | 1.13 | 0.83 | 1.32 | 0.82 | 1.10 | 0.91 | 15.38 | 11.27 |
| Q9QYE3 | B-cell<br>lymphoma/leukemia<br>11A OS=Mus<br>musculus GN=Bel1a<br>PE=1 SV=1 -<br>[BC11A_MOUSE]                                | 19.02 | 7 | 5 | 8  | 17 | 0.95 | 0.94 | 0.94 | 1.05 | 0.99 | 1.14 | 1.11 | 1.13 | 1.20 | 1.06 | 1.07 | 0.98 | 0.96 | 83.80 | 6.28  |
| Q9WV02 | RNA-binding motif<br>protein, X chromosome<br>OS=Mus musculus<br>GN=Rbmx PE=1<br>SV=1 -<br>[RBMX_MOUSE]                       | 40.15 | 4 | 4 | 16 | 68 | 0.92 | 1.02 | 1.37 | 0.97 | 1.02 | 1.02 | 1.20 | 1.13 | 1.37 | 1.20 | 1.32 | 1.02 | 1.21 | 42.28 | 10.05 |
| Q5SXC9 | 28S ribosomal protein<br>S23, mitochondrial<br>OS=Mus musculus<br>GN=Mmps23 PE=2<br>SV=1 -<br>[Q5SXC9_MOUSE]                  | 11.00 | 4 | 1 | 1  | 1  | 0.73 | 1.09 | 1.49 | 1.13 | 1.55 | 1.05 | 1.43 | 1.13 | 1.55 | 1.10 | 1.52 | 0.91 | 1.24 | 11.66 | 10.05 |
| Q8K3A0 | Iron-sulfur cluster<br>co-chaperone protein<br>HscB, mitochondrial<br>OS=Mus musculus<br>GN=Hscb PE=2 SV=2 -<br>[HSC20_MOUSE] | 32.48 | 1 | 5 | 5  | 22 | 1.02 | 0.91 | 0.94 | 0.90 | 0.88 | 1.09 | 1.08 | 1.13 | 1.12 | 1.00 | 1.05 | 0.99 | 1.00 | 26.63 | 7.37  |
| Q9ET80 | Junctophilin-1<br>OS=Mus musculus<br>GN=Jph1 PE=1 SV=1 -<br>[JPH1_MOUSE]                                                      | 8.94  | 1 | 4 | 4  | 8  | 0.93 | 1.11 | 1.14 | 1.03 | 1.10 | 1.29 | 1.37 | 1.13 | 1.19 | 1.04 | 1.05 | 0.98 | 1.02 | 71.86 | 9.22  |
| Q8VDZ4 | Palmitoyltransferase<br>ZDHC5 OS=Mus<br>musculus GN=Zdhc5<br>PE=1 SV=1 -<br>[ZDHC5_MOUSE]                                     | 11.89 | 2 | 6 | 7  | 29 | 1.00 | 1.05 | 1.03 | 1.00 | 0.98 | 1.12 | 1.11 | 1.13 | 1.05 | 1.10 | 1.11 | 1.09 | 1.01 | 77.45 | 9.01  |



|          |                                                                                                                |       |   |    |    |    |      |      |      |      |      |      |      |      |      |      |      |      |      |        |      |
|----------|----------------------------------------------------------------------------------------------------------------|-------|---|----|----|----|------|------|------|------|------|------|------|------|------|------|------|------|------|--------|------|
| Q8VDI7   | Ubiquitin-associated domain-containing protein 1 OS=Mus musculus GN=Ubacl PE=2 SV=2 - [UBAC1_MOUSE]            | 16.38 | 3 | 6  | 6  | 16 | 0.97 | 0.95 | 1.07 | 0.94 | 1.00 | 1.11 | 1.14 | 1.14 | 1.26 | 1.05 | 1.10 | 1.06 | 1.10 | 45.50  | 4.97 |
| Q8BHE3   | Caytaxin OS=Mus musculus GN=Atcay PE=1 SV=1 - [ATCAY_MOUSE]                                                    | 24.19 | 1 | 6  | 6  | 20 | 0.98 | 1.11 | 1.06 | 1.10 | 1.23 | 0.97 | 1.09 | 1.14 | 1.04 | 1.09 | 1.10 | 1.07 | 1.10 | 42.15  | 4.68 |
| Q62407-2 | Isoform 2 of Striated muscle-specific serine/threonine-protein kinase OS=Mus musculus GN=Speg - [SPEG_MOUSE]   | 8.59  | 5 | 5  | 5  | 10 | 1.17 | 1.37 | 1.11 | 0.98 | 0.86 | 1.31 | 1.11 | 1.14 | 1.03 | 1.22 | 0.97 | 1.12 | 0.96 | 93.63  | 9.55 |
| H3BKH3   | DNA-binding protein SATB2 OS=Mus musculus GN=Satb2 PE=2 SV=1 - [H3BKH3_MOUSE]                                  | 9.76  | 3 | 4  | 5  | 9  | 0.91 | 1.12 | 1.23 | 1.07 | 1.26 | 1.10 | 1.20 | 1.14 | 1.25 | 0.96 | 1.03 | 0.93 | 1.00 | 69.10  | 6.57 |
| Q8R2Y8   | Peptidyl-tRNA hydrolase 2, mitochondrial OS=Mus musculus GN=Pth2 PE=2 SV=1 - [PTH2_MOUSE]                      | 24.86 | 1 | 3  | 3  | 6  | 1.19 | 0.85 | 0.67 | 1.03 | 1.02 | 1.25 | 1.17 | 1.14 | 1.04 | 1.22 | 1.04 | 1.04 | 1.07 | 19.51  | 7.42 |
| P42703   | Leukemia inhibitory factor receptor OS=Mus musculus GN=Lifr PE=1 SV=1 - [LIFR_MOUSE]                           | 5.04  | 1 | 3  | 3  | 4  | 1.01 | 0.88 | 0.96 | 0.92 | 0.92 | 1.16 | 1.15 | 1.14 | 1.12 | 1.04 | 1.14 | 0.88 | 0.91 | 122.50 | 6.04 |
| Q8CFV4   | Neuritin OS=Mus musculus GN=Nrn1 PE=1 SV=1 - [NRN1_MOUSE]                                                      | 13.38 | 2 | 2  | 2  | 14 | 0.94 | 0.94 | 1.17 | 0.99 | 1.19 | 1.04 | 1.19 | 1.14 | 1.10 | 1.11 | 1.07 | 0.99 | 1.18 | 15.34  | 6.99 |
| P63276   | 40S ribosomal protein S17 OS=Mus musculus GN=Rps17 PE=1 SV=2 - [RS17_MOUSE]                                    | 55.56 | 1 | 6  | 6  | 18 | 1.02 | 0.84 | 0.79 | 1.05 | 0.95 | 1.08 | 0.98 | 1.14 | 0.94 | 1.06 | 1.07 | 1.02 | 1.03 | 15.51  | 9.85 |
| Q03958   | Prefoldin subunit 6 OS=Mus musculus GN=Pfdn6 PE=2 SV=1 - [PFD6_MOUSE]                                          | 51.18 | 1 | 1  | 9  | 58 | 1.05 | 0.53 | 0.51 | 0.85 | 0.80 | 1.20 | 1.13 | 1.14 | 1.07 | 1.07 | 1.02 | 0.83 | 0.79 | 14.45  | 8.88 |
| Q3UGN9   | Signal transducing adapter molecule 1 OS=Mus musculus GN=Stam PE=2 SV=1 - [Q3UGN9_MOUSE]                       | 60.17 | 4 | 18 | 20 | 93 | 0.95 | 0.78 | 0.84 | 0.88 | 0.91 | 1.20 | 1.19 | 1.14 | 1.12 | 1.04 | 1.08 | 1.00 | 1.04 | 51.11  | 4.87 |
| Q9D014   | Syntaxin-17 OS=Mus musculus GN=Stx17 PE=1 SV=1 - [STX17_MOUSE]                                                 | 23.26 | 2 | 1  | 4  | 6  | 1.12 | 1.14 | 1.02 | 0.97 | 0.87 | 1.27 | 1.13 | 1.14 | 1.01 | 1.25 | 1.12 | 1.15 | 1.03 | 33.20  | 6.74 |
| Q78T54-2 | Isoform 2 of Vacuolar ATPase assembly integral membrane protein VMA21 OS=Mus musculus GN=Vma21 - [VMA21_MOUSE] | 14.46 | 2 | 1  | 1  | 2  | 1.25 | 1.41 | 1.13 | 1.13 | 0.90 | 0.88 | 0.70 | 1.14 | 0.91 | 0.98 | 0.79 | 1.28 | 1.03 | 9.33   | 9.99 |

|          |                                                                                                                                    |       |   |    |    |     |      |      |      |      |      |      |      |      |      |      |      |      |      |        |      |
|----------|------------------------------------------------------------------------------------------------------------------------------------|-------|---|----|----|-----|------|------|------|------|------|------|------|------|------|------|------|------|------|--------|------|
| E9Q355-3 | Isoform 3 of Cation channel sperm-associated protein subunit gamma 1<br>OS=Mus musculus<br>GN=Catsperg1 - [CTSG1_MOUSE]            | 3.88  | 3 | 1  | 1  | 2   | 1.13 | 0.87 | 0.76 | 1.36 | 1.20 | 1.10 | 0.96 | 1.14 | 1.00 | 1.15 | 1.02 | 0.97 | 0.86 | 91.66  | 7.58 |
| Q9JK48   | Endophilin-B1<br>OS=Mus musculus<br>GN=Sh3glb1 PE=1<br>SV=1 - [SHLB1_MOUSE]                                                        | 26.85 | 2 | 8  | 9  | 23  | 0.84 | 1.00 | 1.12 | 0.88 | 1.06 | 1.03 | 1.17 | 1.14 | 1.32 | 1.00 | 1.17 | 1.03 | 1.16 | 40.83  | 6.04 |
| Q8BG75   | Transmembrane protein 198 OS=Mus musculus<br>GN=Tmem198 PE=2<br>SV=1 - [TM198_MOUSE]                                               | 3.61  | 1 | 2  | 2  | 3   | 0.84 | 1.04 | 1.23 | 1.02 | 1.20 | 1.03 | 1.21 | 1.14 | 1.34 | 1.07 | 1.27 | 0.98 | 1.16 | 39.73  | 9.92 |
| Q6NVE9   | Protein phosphatase PTC7 homolog<br>OS=Mus musculus<br>GN=Pptc7 PE=2 SV=1 - [PPTC7_MOUSE]                                          | 14.84 | 2 | 2  | 2  | 7   | 0.79 | 0.81 | 1.03 | 0.84 | 1.06 | 1.01 | 1.28 | 1.14 | 1.44 | 0.93 | 1.18 | 1.08 | 1.37 | 33.03  | 5.27 |
| Q62523   | Zyxin OS=Mus musculus<br>GN=Zyx PE=1 SV=2 - [ZYY_MOUSE]                                                                            | 36.52 | 1 | 15 | 15 | 96  | 1.02 | 1.01 | 1.01 | 0.91 | 0.87 | 1.17 | 1.13 | 1.14 | 1.08 | 1.07 | 1.07 | 0.99 | 0.99 | 60.51  | 6.40 |
| P48678   | Prelamin-A/C<br>OS=Mus musculus<br>GN=Lmna PE=1 SV=2 - [LMNA_MOUSE]                                                                | 61.95 | 4 | 40 | 42 | 525 | 0.98 | 0.98 | 1.02 | 0.89 | 0.93 | 1.07 | 1.09 | 1.14 | 1.17 | 0.98 | 1.01 | 0.92 | 0.94 | 74.19  | 6.98 |
| O35621   | Phosphomannomutase 1<br>OS=Mus musculus<br>GN=Pmm1 PE=1<br>SV=1 - [PMM1_MOUSE]                                                     | 33.59 | 3 | 7  | 8  | 19  | 0.91 | 0.89 | 0.84 | 0.93 | 0.99 | 1.10 | 1.18 | 1.14 | 1.21 | 0.99 | 1.13 | 1.10 | 1.14 | 29.76  | 5.47 |
| Q8JZX4   | Splicing factor 45<br>OS=Mus musculus<br>GN=Rbm17 PE=1<br>SV=1 - [SPF45_MOUSE]                                                     | 29.88 | 2 | 9  | 9  | 22  | 0.97 | 0.86 | 0.92 | 0.89 | 0.91 | 1.04 | 1.03 | 1.14 | 1.13 | 0.95 | 1.01 | 0.88 | 0.98 | 45.28  | 5.82 |
| Q8BWJ4   | Low-density lipoprotein receptor class A domain-containing protein 4<br>OS=Mus musculus<br>GN=Ldlrad4 PE=2<br>SV=1 - [LRAD4_MOUSE] | 2.94  | 1 | 1  | 1  | 1   | 1.20 | 1.49 | 1.24 | 0.96 | 0.80 | 1.06 | 0.88 | 1.14 | 0.95 | 1.12 | 0.93 | 1.11 | 0.93 | 33.84  | 5.45 |
| E0CYG5   | Transmembrane protein 191C OS=Mus musculus<br>GN=Tmem191c PE=2<br>SV=1 - [E0CYG5_MOUSE]                                            | 18.33 | 3 | 1  | 1  | 2   | 1.00 | 1.11 | 1.10 | 0.94 | 0.93 | 1.18 | 1.17 | 1.14 | 1.13 | 1.02 | 1.02 | 1.12 | 1.12 | 6.24   | 4.72 |
| Q80X41-5 | Isoform 5 of Serine/threonine-protein kinase VRK1<br>OS=Mus musculus<br>GN=Vrk1 - [VRK1_MOUSE]                                     | 2.90  | 3 | 1  | 1  | 2   | 0.94 | 0.99 | 1.06 | 0.86 | 0.92 | 1.05 | 1.12 | 1.14 | 1.21 | 1.04 | 1.11 | 1.05 | 1.13 | 47.20  | 9.11 |
| Q8BH60-  | Isoform 2 of Golgi-associated PDZ and coiled-coil motif-containing protein<br>OS=Mus musculus<br>GN=Gopc - [GOPC_MOUSE]            | 11.43 | 3 | 3  | 3  | 37  | 0.86 | 1.05 | 1.25 | 0.95 | 1.06 | 0.96 | 0.99 | 1.14 | 1.34 | 0.99 | 1.10 | 1.10 | 1.09 | 49.76  | 6.35 |
| Q8BXR9   | Oxysterol-binding protein-related protein 6<br>OS=Mus musculus<br>GN=Osbpl6 PE=2<br>SV=1 - [OSBL6_MOUSE]                           | 7.51  | 3 | 6  | 6  | 15  | 0.99 | 0.99 | 1.10 | 1.11 | 1.09 | 1.04 | 1.07 | 1.14 | 1.05 | 1.02 | 1.02 | 1.02 | 1.01 | 108.85 | 7.27 |

|        |                                                                                                                                 |       |    |    |    |     |      |      |      |      |      |      |      |      |      |      |      |      |      |        |      |
|--------|---------------------------------------------------------------------------------------------------------------------------------|-------|----|----|----|-----|------|------|------|------|------|------|------|------|------|------|------|------|------|--------|------|
| P46414 | Cyclin-dependent kinase inhibitor 1B<br>OS=Mus musculus<br>GN=Cdkn1b PE=1<br>SV=2 -<br>[CDN1B_MOUSE]                            | 49.75 | 1  | 7  | 7  | 55  | 0.97 | 1.00 | 1.02 | 0.91 | 0.93 | 1.16 | 1.14 | 1.14 | 1.17 | 1.05 | 1.11 | 0.97 | 1.04 | 22.18  | 7.02 |
| P56380 | Bis(5'-nucleosyl)-tetraphosphatase [asymmetrical]<br>OS=Mus musculus<br>GN=Nudt2 PE=1<br>SV=3 -<br>[AP4A_MOUSE]                 | 31.97 | 1  | 3  | 3  | 8   | 0.99 | 1.25 | 1.25 | 1.13 | 1.14 | 1.13 | 1.13 | 1.14 | 1.17 | 1.12 | 1.07 | 1.16 | 1.12 | 16.98  | 6.28 |
| Q8BG31 | Uncharacterized protein C8orf46 homolog<br>OS=Mus musculus PE=2 SV=1 -<br>[CH046_MOUSE]                                         | 5.80  | 1  | 1  | 1  | 2   | 0.96 | 0.67 | 0.69 | 0.94 | 0.97 | 1.13 | 1.17 | 1.14 | 1.18 | 1.05 | 1.09 | 0.88 | 0.92 | 22.48  | 9.95 |
| Q3TMP1 | General transcription factor IIIc, polypeptide 3<br>OS=Mus musculus<br>GN=Gtf3c3 PE=2<br>SV=1 -<br>[Q3TMP1_MOUSE]               | 0.91  | 1  | 1  | 1  | 2   | 1.28 | 0.92 | 0.71 | 0.94 | 0.74 | 1.21 | 0.94 | 1.14 | 0.88 | 1.16 | 0.90 | 0.77 | 0.60 | 100.56 | 5.15 |
| P20029 | 78 kDa glucose-regulated protein<br>OS=Mus musculus<br>GN=Hspa5 PE=1<br>SV=3 -<br>[GRP78_MOUSE]                                 | 59.54 | 1  | 38 | 41 | 613 | 1.02 | 0.88 | 0.85 | 0.89 | 0.87 | 1.10 | 1.09 | 1.14 | 1.12 | 1.06 | 1.05 | 0.97 | 0.96 | 72.38  | 5.16 |
| P35979 | 60S ribosomal protein L12<br>OS=Mus musculus GN=Rpl12<br>PE=1 SV=2 -<br>[RL12_MOUSE]                                            | 58.18 | 3  | 7  | 7  | 24  | 0.92 | 0.96 | 1.02 | 1.08 | 1.13 | 1.13 | 1.21 | 1.14 | 1.22 | 1.15 | 1.25 | 1.11 | 1.24 | 17.79  | 9.42 |
| F8WHS3 | Complement C1q tumor necrosis factor-related protein 5 (Fragment)<br>OS=Mus musculus GN=C1qtm5<br>PE=2 SV=1 -<br>[F8WHS3_MOUSE] | 6.73  | 2  | 1  | 1  | 2   | 1.34 | 0.76 | 0.57 | 0.77 | 0.58 | 1.05 | 0.78 | 1.14 | 0.85 | 1.28 | 0.96 | 1.73 | 1.30 | 23.19  | 7.40 |
| E9QPE7 | Myosin-11<br>OS=Mus musculus GN=Myh11<br>PE=4 SV=1 -<br>[E9QPE7_MOUSE]                                                          | 39.99 | 3  | 52 | 67 | 290 | 1.01 | 1.04 | 1.02 | 0.90 | 0.89 | 0.92 | 0.91 | 1.14 | 1.09 | 1.34 | 1.26 | 0.90 | 0.92 | 223.22 | 5.50 |
| POC7T6 | Ataxin-1-like<br>OS=Mus musculus GN=Atxn11<br>PE=1 SV=1 -<br>[ATX1L_MOUSE]                                                      | 1.89  | 1  | 1  | 1  | 2   | 1.00 | 0.98 | 0.98 | 0.99 | 1.00 | 1.18 | 1.18 | 1.14 | 1.13 | 0.99 | 1.00 | 0.91 | 0.91 | 73.33  | 6.49 |
| Q99LC5 | Electron transfer flavoprotein subunit alpha, mitochondrial<br>OS=Mus musculus<br>GN=EtfA PE=1 SV=2 -<br>[ETFA_MOUSE]           | 41.14 | 1  | 10 | 10 | 24  | 0.98 | 0.85 | 0.83 | 1.00 | 0.98 | 1.18 | 1.15 | 1.14 | 1.09 | 1.17 | 1.14 | 1.11 | 1.14 | 34.99  | 8.38 |
| Q3UHD0 | AP2-associated protein kinase 1<br>OS=Mus musculus GN=Aak1<br>PE=1 SV=2 -<br>[AAK1_MOUSE]                                       | 62.98 | 16 | 38 | 39 | 257 | 1.01 | 0.92 | 0.94 | 0.96 | 0.94 | 1.12 | 1.11 | 1.14 | 1.14 | 1.04 | 1.07 | 1.01 | 1.03 | 103.28 | 6.70 |
| B2RQG2 | PHD finger protein 3<br>OS=Mus musculus<br>GN=Phf3 PE=2 SV=1 -<br>[B2RQG2_MOUSE]                                                | 6.96  | 1  | 10 | 10 | 17  | 0.99 | 1.09 | 1.11 | 0.99 | 0.98 | 1.16 | 1.11 | 1.14 | 1.15 | 1.04 | 1.02 | 1.02 | 1.05 | 225.40 | 6.70 |

|          |                                                                                                                             |       |   |    |    |    |      |      |      |      |      |      |      |      |      |      |      |      |      |        |      |
|----------|-----------------------------------------------------------------------------------------------------------------------------|-------|---|----|----|----|------|------|------|------|------|------|------|------|------|------|------|------|------|--------|------|
| Q9QZR0   | E3 ubiquitin-protein ligase RNF25 OS=Mus musculus GN=Rnf25 PE=1 SV=2 - [RNF25_MOUSE]                                        | 23.90 | 5 | 7  | 7  | 20 | 0.98 | 0.98 | 1.02 | 0.89 | 0.89 | 1.08 | 1.09 | 1.14 | 1.13 | 0.92 | 1.01 | 1.07 | 1.05 | 51.19  | 6.29 |
| Q8BLY3   | Leucine-rich repeat and fibronectin type-III domain-containing protein 3 OS=Mus musculus GN=Lrln3 PE=1 SV=1 - [LRFN3_MOUSE] | 4.15  | 1 | 1  | 1  | 1  | 0.90 | 0.84 | 0.93 | 0.73 | 0.81 | 0.78 | 0.87 | 1.14 | 1.26 | 0.81 | 0.90 | 1.06 | 1.18 | 66.01  | 7.08 |
| P31001   | Desmin OS=Mus musculus GN=Des PE=1 SV=3 - [DESM_MOUSE]                                                                      | 38.17 | 1 | 12 | 16 | 74 | 0.99 | 1.01 | 1.14 | 0.95 | 1.00 | 1.28 | 1.33 | 1.14 | 1.20 | 1.08 | 1.15 | 1.01 | 1.05 | 53.47  | 5.27 |
| Q5SUE3   | Protein E130309D14Rik OS=Mus musculus GN=E130309D14Rik PE=4 SV=1 - [Q5SUE3_MOUSE]                                           | 4.01  | 1 | 1  | 1  | 1  | 0.93 | 1.02 | 1.10 | 0.97 | 1.04 | 1.12 | 1.20 | 1.14 | 1.22 | 1.06 | 1.14 | 1.24 | 1.33 | 33.35  | 7.62 |
| Q8CFT0   | RELT-like 2 OS=Mus musculus GN=Rel2 PE=2 SV=1 - [Q8CFT0_MOUSE]                                                              | 33.67 | 8 | 5  | 5  | 41 | 1.03 | 1.00 | 1.01 | 0.91 | 0.99 | 1.26 | 1.12 | 1.14 | 1.14 | 1.13 | 1.10 | 0.92 | 0.86 | 31.44  | 6.46 |
| P83917   | Chromobox protein homolog 1 OS=Mus musculus GN=Cbx1 PE=1 SV=1 - [CBX1_MOUSE]                                                | 43.24 | 3 | 8  | 9  | 76 | 1.03 | 0.78 | 0.79 | 0.97 | 0.91 | 1.17 | 1.05 | 1.14 | 1.13 | 1.01 | 0.99 | 0.94 | 0.96 | 21.40  | 4.93 |
| F7ATU7   | Protein D630045J12Rik (Fragment) OS=Mus musculus GN=D630045J12Rik PE=4 SV=1 - [F7ATU7_MOUSE]                                | 17.60 | 1 | 1  | 11 | 20 | 1.22 | 1.20 | 0.98 | 1.17 | 0.96 | 1.08 | 0.88 | 1.14 | 0.93 | 1.13 | 0.92 | 1.21 | 0.99 | 90.62  | 9.38 |
| E9PXB9   | Mitochondrial import inner membrane translocase subunit Tim22 OS=Mus musculus GN=Timm22 PE=2 SV=1 - [E9PXB9_MOUSE]          | 16.67 | 2 | 1  | 1  | 2  | 1.08 | 1.10 | 1.02 | 1.18 | 1.10 | 1.15 | 1.06 | 1.14 | 1.05 | 1.32 | 1.22 | 1.31 | 1.21 | 9.22   | 5.36 |
| Q9CZ00-2 | Isoform 2 of Dysbindin domain-containing protein 1 OS=Mus musculus GN=Dbdd1 - [DBND1_MOUSE]                                 | 37.17 | 8 | 3  | 3  | 10 | 1.18 | 0.80 | 0.82 | 0.86 | 0.72 | 1.23 | 1.03 | 1.14 | 1.04 | 1.02 | 0.94 | 1.06 | 0.94 | 12.46  | 4.91 |
| Q6P9Q6   | FK506-binding protein 15 OS=Mus musculus GN=Fkbp15 PE=1 SV=2 - [FKB15_MOUSE]                                                | 11.84 | 5 | 10 | 10 | 15 | 0.96 | 1.04 | 1.11 | 1.03 | 1.06 | 1.15 | 1.09 | 1.14 | 1.10 | 1.06 | 1.10 | 1.02 | 1.10 | 132.88 | 5.07 |
| Q99K30   | Epidermal growth factor receptor kinase substrate 8-like protein 2 OS=Mus musculus GN=Eps8l2 PE=1 SV=1 - [ES8L2_MOUSE]      | 14.40 | 1 | 8  | 8  | 22 | 0.85 | 0.84 | 0.95 | 0.87 | 1.03 | 1.00 | 1.19 | 1.14 | 1.39 | 0.77 | 0.92 | 0.71 | 0.88 | 82.18  | 7.18 |
| Q9DBS5   | Kinesin light chain 4 OS=Mus musculus GN=Klc4 PE=1 SV=1 - [KLC4_MOUSE]                                                      | 18.74 | 3 | 4  | 9  | 18 | 1.10 | 1.03 | 0.93 | 0.98 | 1.01 | 1.09 | 0.98 | 1.14 | 1.03 | 1.17 | 1.06 | 1.13 | 1.03 | 68.57  | 6.09 |

|          |                                                                                                                  |       |   |    |    |      |      |      |      |      |      |       |       |      |      |      |      |      |      |       |       |
|----------|------------------------------------------------------------------------------------------------------------------|-------|---|----|----|------|------|------|------|------|------|-------|-------|------|------|------|------|------|------|-------|-------|
| P24472   | Glutathione S-transferase A4<br>OS=Mus musculus<br>GN=Gsta4 PE=1 SV=3<br>-[GSTA4_MOUSE]                          | 24.77 | 1 | 5  | 5  | 14   | 1.12 | 0.94 | 0.98 | 1.06 | 1.00 | 1.08  | 0.88  | 1.14 | 0.97 | 1.14 | 0.93 | 1.10 | 0.99 | 25.55 | 7.39  |
| Q91XD7   | Cysteine-rich with EGF-like domain protein 1<br>OS=Mus musculus<br>GN=Crel1 PE=2 SV=1<br>-[CREL1_MOUSE]          | 19.52 | 1 | 7  | 7  | 15   | 1.02 | 1.03 | 1.04 | 1.16 | 1.12 | 1.07  | 1.02  | 1.14 | 1.09 | 1.12 | 1.09 | 1.04 | 1.05 | 45.69 | 5.02  |
| P17182   | Alpha-enolase<br>OS=Mus musculus<br>GN=Eno1 PE=1 SV=3<br>-[ENOA_MOUSE]                                           | 77.42 | 5 | 23 | 32 | 1285 | 0.93 | 0.99 | 1.06 | 1.00 | 1.05 | 1.19  | 1.25  | 1.14 | 1.22 | 1.08 | 1.16 | 1.05 | 1.13 | 47.11 | 6.80  |
| Q63912   | Oligodendrocyte-myelin glycoprotein<br>OS=Mus musculus<br>GN=Omg PE=1 SV=1<br>-[OMGP_MOUSE]                      | 27.50 | 2 | 13 | 13 | 40   | 0.98 | 0.94 | 0.95 | 0.94 | 0.90 | 1.07  | 1.04  | 1.14 | 1.05 | 1.02 | 0.98 | 1.10 | 1.05 | 49.25 | 8.41  |
| A2A6K0   | Troponin I, fast skeletal muscle (Fragment)<br>OS=Mus musculus<br>GN=Tnni2 PE=2 SV=1<br>-[A2A6K0_MOUSE]          | 22.96 | 3 | 3  | 3  | 10   | 0.96 | 1.48 | 1.41 | 0.85 | 0.84 | 18.05 | 20.56 | 1.14 | 1.05 | 1.05 | 1.03 | 1.15 | 1.07 | 15.73 | 8.57  |
| Q9JH2    | Nuclear pore complex protein Nup50<br>OS=Mus musculus<br>GN=Nup50 PE=1 SV=3<br>-[NUP50_MOUSE]                    | 30.90 | 1 | 10 | 10 | 28   | 1.03 | 0.91 | 0.87 | 0.87 | 0.85 | 1.29  | 1.26  | 1.14 | 1.16 | 1.10 | 1.13 | 1.04 | 1.00 | 49.45 | 6.24  |
| Q99K28   | ADP-ribosylation factor GTPase-activating protein 2<br>OS=Mus musculus<br>GN=Arfgap2 PE=1 SV=1<br>-[ARFG2_MOUSE] | 22.50 | 2 | 12 | 12 | 25   | 1.00 | 1.03 | 1.05 | 1.01 | 1.03 | 1.15  | 1.13  | 1.14 | 1.16 | 1.08 | 1.10 | 1.07 | 1.00 | 56.56 | 8.18  |
| Q497H0-2 | Isoform 2 of AN1-type zinc finger protein 3<br>OS=Mus musculus<br>GN=Zfand3<br>-[ZFAN3_MOUSE]                    | 6.83  | 2 | 1  | 1  | 2    | 1.14 | 1.12 | 0.98 | 0.89 | 0.78 | 1.03  | 0.90  | 1.14 | 0.99 | 0.73 | 0.64 | 0.82 | 0.72 | 22.91 | 7.12  |
| P08207   | Protein S100-A10<br>OS=Mus musculus<br>GN=S100a10 PE=2 SV=2<br>-[S10AA_MOUSE]                                    | 17.53 | 1 | 2  | 2  | 4    | 1.13 | 1.09 | 0.96 | 0.94 | 0.83 | 1.19  | 0.81  | 1.14 | 1.00 | 1.15 | 1.01 | 1.69 | 1.49 | 11.18 | 6.77  |
| B9EJA2-2 | Isoform 2 of Cortactin-binding protein 2<br>OS=Mus musculus<br>GN=Cttnbp2<br>-[CTTB2_MOUSE]                      | 55.87 | 8 | 35 | 36 | 105  | 0.97 | 0.87 | 0.90 | 0.87 | 0.93 | 1.10  | 1.16  | 1.14 | 1.18 | 1.02 | 1.04 | 0.95 | 1.02 | 67.51 | 8.22  |
| Q8K2Q9   | Shootin-1<br>OS=Mus musculus<br>GN=Kiaa1598 PE=1 SV=1<br>-[SHOT1_MOUSE]                                          | 26.94 | 2 | 16 | 16 | 41   | 1.05 | 0.88 | 0.87 | 0.90 | 0.84 | 1.17  | 1.08  | 1.14 | 1.12 | 1.08 | 0.99 | 1.02 | 0.92 | 71.30 | 5.44  |
| Q9CWW6   | Peptidyl-prolyl cis-trans isomerase NIMA-interacting 4<br>OS=Mus musculus<br>GN=Pin4 PE=2 SV=1<br>-[PIN4_MOUSE]  | 53.44 | 1 | 5  | 5  | 16   | 0.99 | 0.88 | 0.88 | 0.95 | 0.90 | 1.08  | 1.10  | 1.14 | 1.17 | 1.08 | 1.03 | 0.98 | 1.01 | 13.81 | 9.77  |
| P62274   | 40S ribosomal protein S29<br>OS=Mus musculus<br>GN=Rps29 PE=2 SV=2<br>-[RS29_MOUSE]                              | 10.71 | 2 | 1  | 1  | 1    | 0.97 | 1.04 | 1.06 | 1.17 | 1.20 | 1.48  | 1.52  | 1.14 | 1.17 | 1.14 | 1.17 | 1.08 | 1.11 | 6.67  | 10.13 |

|          |                                                                                                    |       |   |    |    |     |      |      |      |      |      |      |      |      |      |      |      |      |      |       |      |
|----------|----------------------------------------------------------------------------------------------------|-------|---|----|----|-----|------|------|------|------|------|------|------|------|------|------|------|------|------|-------|------|
| P51859   | Hepatoma-derived growth factor OS=Mus musculus GN=Hdgf PE=1 SV=2 - [HDGF_MOUSE]                    | 81.01 | 2 | 2  | 17 | 138 | 0.98 | 0.89 | 0.92 | 0.89 | 0.90 | 1.20 | 1.20 | 1.14 | 1.16 | 1.07 | 1.10 | 1.00 | 1.05 | 26.25 | 4.83 |
| Q7TN29   | Stromal membrane-associated protein 2 OS=Mus musculus GN=Smap2 PE=1 SV=1 - [SMAP2_MOUSE]           | 30.61 | 2 | 10 | 11 | 28  | 0.96 | 0.97 | 1.02 | 1.02 | 1.06 | 1.01 | 1.05 | 1.14 | 1.15 | 1.09 | 1.09 | 0.97 | 1.11 | 46.55 | 8.87 |
| P04925   | Major prion protein OS=Mus musculus GN=Pmp PE=1 SV=2 - [PRIO_MOUSE]                                | 31.50 | 1 | 6  | 6  | 28  | 1.02 | 0.90 | 0.88 | 0.97 | 0.95 | 1.17 | 1.08 | 1.14 | 1.07 | 1.05 | 1.04 | 1.06 | 1.05 | 27.96 | 9.33 |
| P03995-2 | Isoform 2 of Glial fibrillary acidic protein OS=Mus musculus GN=Gfap - [GFAP_MOUSE]                | 56.54 | 2 | 20 | 22 | 101 | 1.39 | 1.06 | 0.74 | 1.04 | 0.75 | 1.09 | 0.76 | 1.14 | 0.83 | 1.54 | 1.13 | 1.11 | 0.77 | 49.33 | 5.50 |
| P61961   | Ubiquitin-fold modifier 1 OS=Mus musculus GN=Ufm1 PE=1 SV=1 - [UFM1_MOUSE]                         | 58.82 | 4 | 4  | 4  | 12  | 1.05 | 1.14 | 0.93 | 0.87 | 0.92 | 1.07 | 1.10 | 1.14 | 1.17 | 0.83 | 1.14 | 0.73 | 0.72 | 9.11  | 9.31 |
| Q9CYA0   | Cysteine-rich with EGF like domain protein 2 OS=Mus musculus GN=Crel2 PE=2 SV=1 - [CREL2_MOUSE]    | 18.57 | 1 | 6  | 6  | 9   | 1.09 | 0.83 | 0.76 | 1.03 | 0.94 | 1.12 | 1.03 | 1.14 | 1.02 | 1.09 | 0.99 | 1.02 | 0.98 | 38.19 | 4.58 |
| O08795-2 | Isoform 2 of Glucosidase 2 subunit beta OS=Mus musculus GN=Prkcsb - [GLU2B_MOUSE]                  | 40.34 | 2 | 17 | 17 | 96  | 1.01 | 0.84 | 0.85 | 0.88 | 0.88 | 1.13 | 1.09 | 1.14 | 1.12 | 1.02 | 0.99 | 0.97 | 0.94 | 59.52 | 4.48 |
| Q02614   | SAP30-binding protein OS=Mus musculus GN=Sap30bp PE=2 SV=2 - [S30BP_MOUSE]                         | 27.92 | 1 | 7  | 7  | 22  | 1.11 | 0.90 | 0.82 | 0.96 | 0.89 | 1.24 | 1.10 | 1.14 | 1.00 | 1.04 | 0.93 | 0.99 | 0.84 | 33.81 | 4.87 |
| Q99MR6   | Isoform C of Serrate RNA effector molecule homolog OS=Mus musculus GN=Srrt - [SRRT_MOUSE]          | 20.14 | 4 | 15 | 15 | 43  | 0.92 | 0.93 | 1.01 | 0.93 | 0.97 | 1.01 | 1.13 | 1.14 | 1.23 | 0.98 | 1.12 | 1.04 | 1.14 | 99.38 | 5.92 |
| A2A6M1   | Vacuolar-sorting protein SNF8 OS=Mus musculus GN=Snf8 PE=2 SV=1 - [A2A6M1_MOUSE]                   | 11.16 | 2 | 2  | 2  | 4   | 0.99 | 1.04 | 1.04 | 0.90 | 0.90 | 1.07 | 1.07 | 1.14 | 1.14 | 1.01 | 1.02 | 1.05 | 1.05 | 25.95 | 6.23 |
| Q9CQ19   | Myosin regulatory light polypeptide 9 OS=Mus musculus GN=Myl9 PE=1 SV=3 - [MYL9_MOUSE]             | 62.21 | 3 | 3  | 8  | 169 | 1.00 | 0.96 | 0.99 | 0.92 | 0.90 | 1.01 | 0.99 | 1.14 | 1.13 | 1.12 | 1.09 | 0.91 | 0.91 | 19.84 | 4.92 |
| Q99MS7   | Isoform 4 of EH domain-binding protein 1-like protein 1 OS=Mus musculus GN=Ehbp111 - [EH1L1_MOUSE] | 7.11  | 7 | 2  | 2  | 5   | 1.45 | 1.18 | 0.87 | 1.27 | 0.94 | 1.08 | 0.79 | 1.14 | 0.78 | 1.04 | 0.77 | 1.51 | 0.94 | 83.90 | 5.67 |

|          |                                                                                                       |       |   |    |    |     |      |      |      |      |      |      |      |      |      |      |      |      |      |        |       |
|----------|-------------------------------------------------------------------------------------------------------|-------|---|----|----|-----|------|------|------|------|------|------|------|------|------|------|------|------|------|--------|-------|
| Q9CQT0   | MCG22296, isoform CRA_b OS=Mus musculus GN=Thg11 PE=2 SV=1 - [Q9CQT0_MOUSE]                           | 4.20  | 2 | 1  | 1  | 2   | 0.94 | 1.22 | 1.29 | 1.02 | 1.08 | 1.18 | 1.24 | 1.14 | 1.20 | 1.13 | 1.20 | 0.89 | 0.94 | 27.98  | 7.11  |
| Q8R361   | Rab11 family-interacting protein 5 OS=Mus musculus GN=Rab11fip5 PE=1 SV=2 - [RFIP5_MOUSE]             | 31.01 | 1 | 13 | 13 | 29  | 1.00 | 0.89 | 0.95 | 0.94 | 0.94 | 1.10 | 1.18 | 1.14 | 1.19 | 1.07 | 1.14 | 1.01 | 1.07 | 69.51  | 9.07  |
| Q01705-4 | Isoform 4 of Neurogenic locus notch homolog protein 1 OS=Mus musculus GN=Notch1 - [NOTCH1_MOUSE]      | 2.11  | 4 | 3  | 4  | 7   | 0.86 | 1.28 | 1.33 | 0.98 | 1.15 | 1.09 | 1.27 | 1.14 | 1.29 | 1.30 | 1.53 | 1.28 | 1.34 | 269.00 | 5.07  |
| Q05BH3   | Dhx16 protein OS=Mus musculus GN=Dhx16 PE=2 SV=1 - [Q05BH3_MOUSE]                                     | 3.91  | 2 | 2  | 2  | 3   | 0.98 | 1.05 | 1.08 | 0.98 | 0.90 | 1.10 | 0.86 | 1.14 | 1.16 | 1.09 | 1.05 | 1.01 | 1.03 | 83.99  | 6.55  |
| Q7TPB0   | Lipid phosphate phosphatase-related protein type 3 OS=Mus musculus GN=Lppr3 PE=2 SV=1 - [LPPR3_MOUSE] | 18.85 | 3 | 10 | 10 | 26  | 1.40 | 1.18 | 0.86 | 1.01 | 0.78 | 1.21 | 0.90 | 1.14 | 0.88 | 1.37 | 0.98 | 1.35 | 0.99 | 76.64  | 6.01  |
| Q60872   | Eukaryotic translation initiation factor 1A OS=Mus musculus GN=Eif1a PE=2 SV=3 - [EIF1A_MOUSE]        | 14.58 | 8 | 1  | 2  | 4   | 1.24 | 1.14 | 0.92 | 1.15 | 0.93 | 0.83 | 0.67 | 1.14 | 0.92 | 1.19 | 0.96 | 1.14 | 0.92 | 16.49  | 5.24  |
| P48771   | Cytochrome c oxidase subunit 7A2, mitochondrial OS=Mus musculus GN=Cox7a2 PE=1 SV=2 - [CX7A2_MOUSE]   | 27.71 | 1 | 3  | 3  | 64  | 1.00 | 0.86 | 0.88 | 1.02 | 0.99 | 1.16 | 1.20 | 1.14 | 1.11 | 1.12 | 1.07 | 1.02 | 1.04 | 9.28   | 10.27 |
| Q9JKF6   | Poliovirus receptor-related protein 1 OS=Mus musculus GN=Pvr1 PE=1 SV=3 - [PVRL1_MOUSE]               | 38.25 | 1 | 14 | 14 | 49  | 1.03 | 1.03 | 0.98 | 1.02 | 0.97 | 1.23 | 1.16 | 1.14 | 1.10 | 1.11 | 1.02 | 1.07 | 1.02 | 57.00  | 6.35  |
| G5E884   | Serine/threonine-protein kinase PAK 1 OS=Mus musculus GN=Pak1 PE=4 SV=1 - [G5E884_MOUSE]              | 65.81 | 2 | 15 | 24 | 201 | 0.93 | 0.83 | 0.85 | 0.88 | 0.94 | 1.06 | 1.10 | 1.14 | 1.18 | 0.92 | 1.00 | 0.90 | 0.94 | 60.57  | 5.86  |
| Q9CPV2   | Anaphase-promoting complex subunit 16 OS=Mus musculus GN=Anapc16 PE=2 SV=1 - [APC16_MOUSE]            | 17.27 | 1 | 2  | 2  | 3   | 1.13 | 0.81 | 0.72 | 0.94 | 0.83 | 1.18 | 1.04 | 1.14 | 1.01 | 1.00 | 0.89 | 0.97 | 0.86 | 11.66  | 4.97  |
| P63089   | Pleiotrophin OS=Mus musculus GN=Ptn PE=2 SV=1 - [PTN_MOUSE]                                           | 39.29 | 1 | 5  | 5  | 21  | 0.91 | 0.84 | 0.92 | 1.02 | 1.15 | 1.06 | 1.09 | 1.14 | 1.22 | 0.97 | 1.08 | 1.11 | 1.21 | 18.86  | 9.60  |

|        |                                                                                                                                                 |       |   |    |    |     |      |      |      |      |      |      |      |      |      |      |      |      |      |        |       |
|--------|-------------------------------------------------------------------------------------------------------------------------------------------------|-------|---|----|----|-----|------|------|------|------|------|------|------|------|------|------|------|------|------|--------|-------|
| Q99LQ4 | Coiled-coil domain-containing protein 23<br>OS=Mus musculus<br>GN=Ccdc23 PE=2<br>SV=1 -<br>[CCD23_MOUSE]                                        | 22.73 | 2 | 1  | 1  | 5   | 1.01 | 0.87 | 0.98 | 0.93 | 0.92 | 1.29 | 1.13 | 1.14 | 1.01 | 0.94 | 0.91 | 1.08 | 0.94 | 7.83   | 9.16  |
| Q9CQR4 | Acyl-coenzyme A thioesterase 13<br>OS=Mus musculus<br>GN=Acot13 PE=1<br>SV=1 -<br>[ACO13_MOUSE]                                                 | 62.14 | 1 | 6  | 6  | 21  | 0.95 | 0.95 | 0.91 | 0.99 | 1.05 | 1.17 | 1.23 | 1.14 | 1.16 | 1.11 | 1.11 | 1.06 | 1.11 | 15.17  | 8.82  |
| Q6NZN0 | Isoform 5 of RNA-binding protein 26<br>OS=Mus musculus<br>GN=Rbm26 -<br>[RBM26_MOUSE]                                                           | 14.26 | 8 | 11 | 12 | 28  | 1.00 | 0.78 | 0.77 | 0.90 | 0.89 | 1.07 | 1.09 | 1.14 | 1.11 | 0.99 | 1.00 | 0.90 | 0.92 | 111.21 | 9.44  |
| E9PXB7 | E3 ubiquitin-protein ligase NEDD4-like<br>OS=Mus musculus<br>GN=Nedd4l PE=2<br>SV=1 -<br>[E9PXB7_MOUSE]                                         | 17.52 | 5 | 10 | 12 | 23  | 0.98 | 1.11 | 1.20 | 0.96 | 0.96 | 1.03 | 1.13 | 1.14 | 1.19 | 1.02 | 1.09 | 1.02 | 0.96 | 112.15 | 5.87  |
| Q9DCB1 | Isoform 3 of High mobility group nucleosome-binding domain-containing protein 3<br>OS=Mus musculus<br>GN=Hmgn3 -<br>[HMGN3_MOUSE]               | 33.68 | 3 | 2  | 2  | 11  | 0.92 | 0.81 | 0.66 | 0.92 | 0.93 | 1.18 | 1.15 | 1.14 | 1.07 | 1.08 | 1.07 | 0.96 | 0.98 | 10.24  | 9.95  |
| Q9D0S9 | Histidine triad nucleotide-binding protein 2, mitochondrial<br>OS=Mus musculus<br>GN=Him2<br>PE=2 SV=1 -<br>[HINT2_MOUSE]                       | 42.33 | 1 | 4  | 4  | 17  | 1.03 | 1.03 | 0.95 | 1.08 | 0.98 | 1.12 | 1.00 | 1.14 | 1.05 | 1.02 | 0.97 | 0.97 | 0.95 | 17.31  | 9.82  |
| P10854 | Histone H2B type 1-M<br>OS=Mus musculus<br>GN=Hist1h2bm<br>PE=1<br>SV=2 -<br>[H2B1M_MOUSE]                                                      | 57.94 | 5 | 5  | 9  | 121 | 1.08 | 0.97 | 0.91 | 1.09 | 1.07 | 1.19 | 1.14 | 1.14 | 1.07 | 1.18 | 1.10 | 1.21 | 1.14 | 13.93  | 10.32 |
| Q60749 | KH domain-containing, RNA-binding, signal transduction-associated protein 1<br>OS=Mus musculus<br>GN=Khdrbs1<br>PE=1<br>SV=2 -<br>[KHDR1_MOUSE] | 13.77 | 1 | 3  | 5  | 17  | 1.09 | 0.81 | 0.78 | 0.84 | 0.87 | 1.08 | 1.08 | 1.14 | 1.10 | 0.98 | 0.96 | 0.83 | 0.91 | 48.34  | 8.72  |
| E9PZF0 | Nucleoside diphosphate kinase<br>OS=Mus musculus<br>GN=Gm20390<br>PE=2<br>SV=1 -<br>[E9PZF0_MOUSE]                                              | 65.92 | 3 | 4  | 12 | 71  | 1.07 | 0.73 | 0.76 | 0.95 | 0.93 | 1.00 | 0.94 | 1.14 | 1.03 | 0.93 | 0.83 | 0.92 | 0.91 | 30.18  | 8.72  |
| O35668 | Huntingtin-associated protein 1<br>OS=Mus musculus<br>GN=Hap1<br>PE=1 SV=1 -<br>[HAP1_MOUSE]                                                    | 19.27 | 5 | 11 | 11 | 28  | 2.68 | 1.22 | 0.40 | 0.99 | 0.35 | 1.28 | 0.43 | 1.14 | 0.39 | 2.44 | 0.85 | 2.41 | 0.87 | 70.07  | 4.74  |
| Q99N92 | 39S ribosomal protein L27, mitochondrial<br>OS=Mus musculus<br>GN=Mrpl27<br>PE=2<br>SV=1 -<br>[RM27_MOUSE]                                      | 12.84 | 1 | 2  | 2  | 2   | 1.04 | 0.97 | 0.93 | 1.00 | 0.96 | 0.99 | 0.94 | 1.14 | 1.09 | 1.03 | 0.98 | 0.96 | 0.92 | 15.93  | 10.17 |



|        |                                                                                                           |       |    |    |    |     |      |      |      |      |      |      |      |      |      |      |      |      |      |        |      |
|--------|-----------------------------------------------------------------------------------------------------------|-------|----|----|----|-----|------|------|------|------|------|------|------|------|------|------|------|------|------|--------|------|
| A2A485 | Protein Zmynd8<br>OS=Mus musculus<br>GN=Zmynd8 PE=2<br>SV=1 -<br>[A2A485_MOUSE]                           | 3.02  | 10 | 3  | 3  | 5   | 0.97 | 0.88 | 1.04 | 0.94 | 1.01 | 1.04 | 1.02 | 1.14 | 1.05 | 0.98 | 1.01 | 0.97 | 1.01 | 120.76 | 6.65 |
| Q8C7U1 | NEDD4-binding<br>protein 3 OS=Mus<br>musculus GN=N4bp3<br>PE=2 SV=1 -<br>[N4BP3_MOUSE]                    | 2.79  | 3  | 1  | 2  | 2   | 0.97 | 1.15 | 1.18 | 0.89 | 0.91 | 1.23 | 1.26 | 1.14 | 1.17 | 1.07 | 1.10 | 0.80 | 0.82 | 60.01  | 8.16 |
| O88856 | Protein-tyrosine<br>sulfotransferase 2<br>OS=Mus musculus<br>GN=Tpst2 PE=1 SV=1<br>- [TPST2_MOUSE]        | 6.65  | 2  | 1  | 1  | 1   | 1.22 | 1.47 | 1.20 | 1.00 | 0.82 | 0.92 | 0.75 | 1.14 | 0.93 | 1.20 | 0.98 | 1.25 | 1.02 | 42.04  | 9.35 |
| B2RRE7 | OTU domain-<br>containing protein 4<br>OS=Mus musculus<br>GN=Otud4 PE=1<br>SV=1 -<br>[OTUD4_MOUSE]        | 5.15  | 1  | 4  | 4  | 9   | 0.96 | 1.10 | 1.15 | 0.90 | 1.03 | 1.09 | 1.10 | 1.14 | 1.19 | 1.24 | 1.25 | 1.18 | 1.34 | 122.98 | 6.76 |
| P55288 | Cadherin-11 OS=Mus<br>musculus GN=Cdh11<br>PE=1 SV=1 -<br>[CAD11_MOUSE]                                   | 17.34 | 4  | 10 | 10 | 23  | 0.96 | 0.97 | 1.01 | 1.06 | 1.09 | 1.12 | 1.12 | 1.14 | 1.24 | 1.05 | 1.08 | 0.99 | 1.02 | 88.06  | 4.89 |
| P49813 | Tropomodulin-1<br>OS=Mus musculus<br>GN=Tmod1 PE=2<br>SV=2 -<br>[TMOD1_MOUSE]                             | 49.86 | 1  | 16 | 16 | 55  | 0.92 | 0.91 | 0.99 | 0.94 | 1.04 | 1.20 | 1.25 | 1.14 | 1.19 | 1.04 | 1.16 | 1.01 | 1.11 | 40.44  | 5.10 |
| Q9JHS3 | Regulator complex<br>protein LAMTOR2<br>OS=Mus musculus<br>GN=Lamtor2 PE=1<br>SV=1 -<br>[LTOR2_MOUSE]     | 8.00  | 1  | 1  | 1  | 1   | 1.58 | 2.23 | 1.41 | 1.91 | 1.21 | 0.99 | 0.62 | 1.14 | 0.72 | 2.32 | 1.47 | 2.37 | 1.50 | 13.47  | 5.40 |
| P62311 | U6 snRNA-associated<br>Sm-like protein LSM3<br>OS=Mus musculus<br>GN=Lsm3 PE=3 SV=2<br>- [LSM3_MOUSE]     | 19.61 | 1  | 2  | 2  | 5   | 1.06 | 0.93 | 1.01 | 0.89 | 0.95 | 1.05 | 1.11 | 1.14 | 1.04 | 0.94 | 1.01 | 1.00 | 0.97 | 11.84  | 4.70 |
| O70591 | Prefoldin subunit 2<br>OS=Mus musculus<br>GN=Pfdn2 PE=2 SV=2<br>- [PFD2_MOUSE]                            | 50.65 | 2  | 7  | 7  | 114 | 1.06 | 0.87 | 0.83 | 0.94 | 0.88 | 1.17 | 1.11 | 1.14 | 1.08 | 1.09 | 1.03 | 1.04 | 0.97 | 16.52  | 6.58 |
| E9PZ43 | Microtubule-associated<br>protein OS=Mus<br>musculus GN=Map4<br>PE=2 SV=1 -<br>[E9PZ43_MOUSE]             | 58.52 | 5  | 23 | 41 | 212 | 1.07 | 0.93 | 0.85 | 0.94 | 0.88 | 1.15 | 1.06 | 1.14 | 1.10 | 1.08 | 1.00 | 1.00 | 0.91 | 97.74  | 9.09 |
| Q5SXD3 | HD domain-containing<br>protein 2 OS=Mus<br>musculus GN=Hddc2<br>PE=2 SV=1 -<br>[HDDC2_MOUSE]             | 34.17 | 4  | 4  | 5  | 14  | 1.09 | 1.19 | 0.92 | 0.99 | 0.93 | 1.29 | 1.15 | 1.14 | 1.05 | 1.31 | 1.14 | 1.21 | 1.06 | 22.74  | 5.02 |
| Q9CYS6 | Uncharacterized<br>protein C2orf72<br>homolog OS=Mus<br>musculus PE=2 SV=2 -<br>[CB072_MOUSE]             | 4.20  | 2  | 1  | 1  | 2   | 1.07 | 0.93 | 0.87 | 1.03 | 0.97 | 1.16 | 1.08 | 1.14 | 1.07 | 1.07 | 1.00 | 1.01 | 0.95 | 30.30  | 6.05 |
| A6H6A9 | Rab GTPase-activating<br>protein 1-like OS=Mus<br>musculus<br>GN=Rabgap11 PE=1<br>SV=1 -<br>[RBG11_MOUSE] | 4.91  | 2  | 1  | 3  | 12  | 1.42 | 1.58 | 1.11 | 1.90 | 1.33 | 0.86 | 0.60 | 1.14 | 0.80 | 1.04 | 0.73 | 1.22 | 0.86 | 92.34  | 5.31 |

|         |                                                                                                                |       |   |    |    |    |      |      |      |      |      |      |      |      |      |      |      |      |      |        |      |
|---------|----------------------------------------------------------------------------------------------------------------|-------|---|----|----|----|------|------|------|------|------|------|------|------|------|------|------|------|------|--------|------|
| Q8BTS1  | Cytochrome c oxidase assembly factor 4 homolog, mitochondrial OS=Mus musculus GN=COA4 PE=3 SV=1 - [COA4_MOUSE] | 17.24 | 1 | 2  | 2  | 14 | 1.04 | 1.17 | 0.99 | 0.97 | 0.87 | 1.14 | 0.96 | 1.14 | 1.08 | 1.08 | 0.97 | 0.90 | 0.88 | 10.13  | 6.90 |
| O88951  | Protein lin-7 homolog B OS=Mus musculus GN=Lin7b PE=1 SV=2 - [LIN7B_MOUSE]                                     | 30.92 | 1 | 2  | 7  | 48 | 0.96 | 0.98 | 1.05 | 0.99 | 1.09 | 1.06 | 1.15 | 1.14 | 1.26 | 1.11 | 1.18 | 0.98 | 1.08 | 22.90  | 8.68 |
| D3YVV7  | Protein Nova2 OS=Mus musculus GN=Nova2 PE=4 SV=2 - [D3YVV7_MOUSE]                                              | 23.98 | 2 | 6  | 8  | 17 | 0.90 | 0.90 | 1.05 | 0.96 | 1.08 | 1.17 | 1.27 | 1.14 | 1.10 | 0.96 | 0.98 | 0.99 | 1.11 | 49.04  | 8.16 |
| Q9CQJ6  | Density-regulated protein OS=Mus musculus GN=Denr PE=2 SV=1 - [DENR_MOUSE]                                     | 46.97 | 2 | 9  | 9  | 32 | 1.08 | 0.97 | 0.88 | 0.97 | 0.89 | 1.12 | 1.00 | 1.14 | 1.05 | 1.09 | 1.00 | 1.01 | 0.95 | 22.15  | 5.30 |
| Q8BVU5  | ADP-ribose pyrophosphatase, mitochondrial OS=Mus musculus GN=Nudt9 PE=2 SV=1 - [NUDT9_MOUSE]                   | 21.43 | 4 | 7  | 7  | 19 | 0.91 | 0.95 | 1.00 | 0.94 | 1.04 | 1.10 | 1.22 | 1.14 | 1.19 | 0.97 | 1.04 | 1.01 | 1.13 | 38.58  | 6.76 |
| Q3UTQ8  | Cyclin-dependent kinase-like 5 OS=Mus musculus GN=Cdk15 PE=2 SV=1 - [CDKL5_MOUSE]                              | 9.81  | 3 | 7  | 8  | 14 | 0.96 | 0.91 | 0.94 | 1.04 | 1.12 | 1.14 | 1.17 | 1.14 | 1.20 | 1.12 | 1.16 | 1.00 | 1.07 | 105.42 | 9.58 |
| F7D4S5  | SLAIN motif-containing protein 1 (Fragment) OS=Mus musculus GN=Slain1 PE=2 SV=1 - [F7D4S5_MOUSE]               | 6.95  | 5 | 3  | 3  | 5  | 0.85 | 0.84 | 0.99 | 0.82 | 0.90 | 1.23 | 1.17 | 1.14 | 1.24 | 1.16 | 1.28 | 1.08 | 1.41 | 56.93  | 8.09 |
| Q2KN98  | Cytosin-A OS=Mus musculus GN=Specc11 PE=1 SV=1 - [CYTSA_MOUSE]                                                 | 9.66  | 5 | 8  | 10 | 27 | 0.95 | 0.93 | 0.93 | 0.94 | 1.02 | 1.12 | 1.20 | 1.14 | 1.13 | 1.07 | 1.07 | 0.98 | 0.99 | 124.41 | 5.76 |
| Q14CH02 | Isoform 2 of Protein FAM171B OS=Mus musculus GN=Fam171b - [F171B_MOUSE]                                        | 21.44 | 2 | 13 | 13 | 28 | 1.08 | 0.98 | 0.89 | 1.04 | 0.92 | 1.15 | 1.04 | 1.14 | 1.00 | 1.07 | 0.98 | 1.02 | 0.92 | 91.48  | 8.37 |
| O08919  | Numb-like protein OS=Mus musculus GN=Numb1 PE=1 SV=3 - [NUMBL_MOUSE]                                           | 26.82 | 1 | 10 | 12 | 43 | 0.99 | 0.90 | 0.91 | 0.95 | 0.91 | 1.11 | 1.13 | 1.14 | 1.17 | 1.04 | 1.04 | 1.08 | 1.08 | 64.09  | 8.82 |
| Q8JZS0  | Protein lin-7 homolog A OS=Mus musculus GN=Lin7a PE=1 SV=2 - [LIN7A_MOUSE]                                     | 58.37 | 3 | 5  | 12 | 72 | 0.86 | 0.81 | 0.99 | 0.82 | 0.98 | 1.04 | 1.17 | 1.14 | 1.28 | 0.89 | 1.01 | 0.91 | 0.99 | 25.98  | 8.72 |
| Q9DCW4  | Electron transfer flavoprotein subunit beta OS=Mus musculus GN=Etfb PE=1 SV=3 - [ETFB_MOUSE]                   | 45.88 | 1 | 10 | 10 | 30 | 0.98 | 1.01 | 0.94 | 1.01 | 1.03 | 1.16 | 1.15 | 1.15 | 1.09 | 1.11 | 1.12 | 1.07 | 1.05 | 27.61  | 8.10 |
| P70268  | Serine/threonine-protein kinase N1 OS=Mus musculus GN=Pkn1 PE=1 SV=3 - [PKN1_MOUSE]                            | 2.11  | 3 | 1  | 2  | 3  | 0.84 | 1.06 | 1.26 | 0.98 | 1.16 | 1.07 | 1.26 | 1.15 | 1.36 | 1.14 | 1.36 | 1.08 | 1.29 | 104.35 | 6.27 |

|          |                                                                                                             |       |   |    |    |     |      |      |      |      |      |      |      |      |      |      |      |      |      |        |      |
|----------|-------------------------------------------------------------------------------------------------------------|-------|---|----|----|-----|------|------|------|------|------|------|------|------|------|------|------|------|------|--------|------|
| Q9ERB0   | Synaptosomal-associated protein 29<br>OS=Mus musculus<br>GN=Snap29 PE=1<br>SV=1 -<br>[SNP29_MOUSE]          | 58.08 | 1 | 13 | 13 | 43  | 1.02 | 0.81 | 0.78 | 0.89 | 0.88 | 1.17 | 1.14 | 1.15 | 1.12 | 1.05 | 1.04 | 0.98 | 0.97 | 29.55  | 5.38 |
| Q8BGK9   | Uncharacterized protein C3orf18 homolog<br>OS=Mus musculus PE=2 SV=1 -<br>[CC018_MOUSE]                     | 8.54  | 1 | 1  | 1  | 1   | 0.73 | 1.18 | 1.62 | 1.03 | 1.41 | 1.04 | 1.42 | 1.15 | 1.56 | 1.25 | 1.72 | 0.84 | 1.15 | 17.71  | 5.29 |
| Q3V0A7   | Protein 4930402H24Rik<br>OS=Mus musculus<br>GN=4930402H24Rik<br>PE=2 SV=1 -<br>[Q3V0A7_MOUSE]               | 0.76  | 2 | 1  | 1  | 1   | 0.94 | 0.88 | 0.93 | 0.97 | 1.03 | 1.09 | 1.15 | 1.15 | 1.21 | 1.11 | 1.18 | 1.02 | 1.09 | 117.45 | 6.47 |
| G3X9V7   | MCG19133, isoform CRA_b<br>OS=Mus musculus<br>GN=A830010M20Rik<br>PE=4 SV=1 -<br>[G3X9V7_MOUSE]             | 45.50 | 6 | 35 | 35 | 257 | 0.95 | 0.98 | 1.00 | 0.96 | 1.01 | 1.12 | 1.15 | 1.15 | 1.19 | 1.01 | 1.06 | 0.95 | 0.97 | 117.24 | 7.80 |
| E9PY17   | Protein Lmo7<br>OS=Mus musculus GN=Lmo7<br>PE=2 SV=1 -<br>[E9PY17_MOUSE]                                    | 28.77 | 7 | 32 | 32 | 102 | 0.93 | 0.97 | 0.98 | 0.91 | 0.98 | 1.15 | 1.15 | 1.15 | 1.16 | 1.04 | 1.06 | 0.94 | 1.07 | 164.64 | 5.73 |
| Q8R0L9-2 | Isoform 2 of Transcriptional adapter 3<br>OS=Mus musculus GN=Tada3 -<br>[TADA3_MOUSE]                       | 19.13 | 3 | 6  | 6  | 11  | 0.95 | 0.98 | 0.85 | 0.90 | 0.90 | 1.11 | 1.03 | 1.15 | 1.08 | 1.09 | 1.08 | 0.99 | 0.92 | 46.59  | 6.57 |
| F8VQ70   | Protein Scaper<br>OS=Mus musculus GN=Scaper PE=2<br>SV=1 -<br>[F8VQ70_MOUSE]                                | 1.29  | 1 | 1  | 1  | 2   | 0.93 | 0.91 | 0.98 | 1.07 | 1.15 | 1.11 | 1.18 | 1.15 | 1.23 | 1.00 | 1.08 | 1.10 | 1.18 | 157.68 | 7.31 |
| Q9JJK1   | Syntaxin-6<br>OS=Mus musculus GN=Stx6<br>PE=1 SV=1 -<br>[STX6_MOUSE]                                        | 46.27 | 2 | 9  | 9  | 26  | 0.99 | 1.07 | 1.07 | 0.99 | 0.99 | 1.12 | 1.17 | 1.15 | 1.11 | 1.05 | 1.03 | 0.93 | 1.00 | 28.98  | 4.92 |
| B8QI36   | Liprin-alpha 4<br>OS=Mus musculus GN=Ppfi4 PE=2<br>SV=1 -<br>[B8QI36_MOUSE]                                 | 12.47 | 1 | 7  | 11 | 22  | 1.05 | 1.01 | 1.01 | 1.06 | 0.97 | 1.06 | 1.01 | 1.15 | 1.05 | 1.21 | 1.08 | 1.16 | 1.13 | 133.63 | 6.27 |
| Q921S7   | 39S ribosomal protein L37, mitochondrial<br>OS=Mus musculus GN=Mrpl37 PE=2<br>SV=1 -<br>[RM37_MOUSE]        | 3.55  | 1 | 1  | 1  | 2   | 0.91 | 0.86 | 0.94 | 0.96 | 1.06 | 1.01 | 1.10 | 1.15 | 1.25 | 0.96 | 1.06 | 1.08 | 1.19 | 48.31  | 8.84 |
| Q8BIH1   | Zinc finger C2HC domain-containing protein 1A<br>OS=Mus musculus GN=Zc2hc1a<br>PE=2 SV=1 -<br>[ZC21A_MOUSE] | 63.89 | 2 | 18 | 18 | 91  | 1.05 | 0.82 | 0.76 | 0.95 | 0.90 | 1.15 | 1.09 | 1.15 | 1.10 | 1.07 | 1.02 | 0.98 | 0.95 | 35.13  | 9.88 |
| Q925B0   | PRKC apoptosis WT1 regulator protein<br>OS=Mus musculus GN=Pawr PE=1 SV=2 -<br>[PAWR_MOUSE]                 | 19.52 | 2 | 5  | 5  | 9   | 0.96 | 0.89 | 0.95 | 0.98 | 1.04 | 1.03 | 1.07 | 1.15 | 1.35 | 1.08 | 1.15 | 1.07 | 1.00 | 35.89  | 5.92 |
| Q8BG26   | RUN and SH3 domain-containing protein 1<br>OS=Mus musculus GN=Rusc1 PE=1<br>SV=2 -<br>[RUSC1_MOUSE]         | 2.46  | 2 | 2  | 2  | 5   | 0.98 | 0.94 | 0.95 | 0.99 | 0.94 | 1.14 | 1.12 | 1.15 | 1.08 | 1.13 | 1.10 | 1.05 | 1.07 | 95.14  | 6.02 |

|        |                                                                                                                      |       |   |    |    |     |      |      |      |      |      |      |      |      |      |      |      |      |      |        |      |
|--------|----------------------------------------------------------------------------------------------------------------------|-------|---|----|----|-----|------|------|------|------|------|------|------|------|------|------|------|------|------|--------|------|
| Q9ERT9 | Protein phosphatase 1 regulatory subunit 1A<br>OS=Mus musculus<br>GN=Ppp1r1a PE=2<br>SV=1 -<br>[PPR1A_MOUSE]         | 83.04 | 1 | 11 | 11 | 73  | 1.03 | 0.93 | 0.85 | 0.96 | 0.93 | 1.10 | 1.07 | 1.15 | 1.07 | 1.09 | 1.09 | 1.00 | 0.98 | 18.71  | 5.25 |
| Q9JJU8 | SH3 domain-binding glutamic acid-rich-like protein OS=Mus musculus GN=Sh3bgrl PE=3 SV=1 -<br>[SH3L1_MOUSE]           | 93.86 | 1 | 12 | 12 | 84  | 1.05 | 0.88 | 0.86 | 0.91 | 0.85 | 1.15 | 1.10 | 1.15 | 1.08 | 1.07 | 1.06 | 1.05 | 1.03 | 12.80  | 4.92 |
| Q8BXQ8 | Protein FAM53C<br>OS=Mus musculus<br>GN=Fam53c PE=1<br>SV=1 -<br>[FA53C_MOUSE]                                       | 4.33  | 1 | 1  | 1  | 1   | 1.26 | 0.70 | 0.56 | 1.01 | 0.81 | 1.13 | 0.89 | 1.15 | 0.91 | 1.18 | 0.94 | 1.08 | 0.86 | 43.23  | 7.72 |
| Q810J8 | Zinc finger FYVE domain-containing protein 1 OS=Mus musculus GN=Zfyve1 PE=2 SV=2 -<br>[ZFYV1_MOUSE]                  | 7.34  | 1 | 4  | 4  | 6   | 1.07 | 1.25 | 1.16 | 1.02 | 0.95 | 1.05 | 0.98 | 1.15 | 1.08 | 1.16 | 1.10 | 1.25 | 1.19 | 86.88  | 7.34 |
| Q99P31 | Hsp70-binding protein 1 OS=Mus musculus GN=Hspbp1 PE=2<br>SV=1 -<br>[HPBP1_MOUSE]                                    | 23.25 | 1 | 4  | 4  | 12  | 0.82 | 1.11 | 1.25 | 1.19 | 1.20 | 0.98 | 1.12 | 1.15 | 1.27 | 1.14 | 1.29 | 1.00 | 1.18 | 39.14  | 5.36 |
| Q99MP8 | Isoform 2 of BRCA1-associated protein OS=Mus musculus GN=Brap -<br>[BRAP_MOUSE]                                      | 21.21 | 4 | 8  | 8  | 15  | 0.93 | 0.80 | 0.86 | 0.81 | 0.85 | 0.87 | 0.93 | 1.15 | 1.16 | 0.75 | 0.76 | 0.80 | 0.84 | 63.91  | 5.71 |
| Q32M26 | Uncharacterized protein C11orf87 homolog OS=Mus musculus PE=2 SV=1 -<br>[CK087_MOUSE]                                | 5.03  | 1 | 1  | 1  | 2   | 0.90 | 0.86 | 0.96 | 1.03 | 1.15 | 1.24 | 1.37 | 1.15 | 1.27 | 1.11 | 1.23 | 0.95 | 1.06 | 20.70  | 9.29 |
| P62073 | Mitochondrial import inner membrane translocase subunit Tim10 OS=Mus musculus GN=Timm10 PE=1 SV=1 -<br>[TIM10_MOUSE] | 53.33 | 1 | 5  | 5  | 218 | 1.05 | 0.93 | 0.88 | 0.97 | 0.91 | 1.11 | 1.07 | 1.15 | 1.09 | 1.08 | 1.02 | 1.05 | 0.99 | 10.33  | 6.29 |
| Q9D6T0 | Nitric oxide synthase-interacting protein OS=Mus musculus GN=Nosip PE=2<br>SV=1 -<br>[NOSIP_MOUSE]                   | 14.62 | 3 | 3  | 3  | 6   | 0.97 | 0.98 | 1.01 | 0.87 | 0.93 | 1.11 | 1.16 | 1.15 | 1.18 | 1.09 | 1.05 | 1.11 | 1.07 | 33.19  | 8.62 |
| P47740 | Fatty aldehyde dehydrogenase OS=Mus musculus GN=Aldh3a2 PE=2<br>SV=2 -<br>[AL3A2_MOUSE]                              | 2.48  | 3 | 1  | 1  | 3   | 1.21 | 1.64 | 1.35 | 1.35 | 1.11 | 0.93 | 0.76 | 1.15 | 0.94 | 0.86 | 0.71 | 1.04 | 1.06 | 53.94  | 8.35 |
| E9Q2S0 | Protein Pcdh7 OS=Mus musculus GN=Pcdh7 PE=2<br>SV=1 -<br>[E9Q2S0_MOUSE]                                              | 27.57 | 5 | 23 | 23 | 63  | 0.97 | 0.99 | 1.02 | 0.97 | 1.02 | 1.09 | 1.11 | 1.15 | 1.13 | 1.01 | 1.04 | 1.03 | 1.05 | 136.69 | 5.17 |

|          |                                                                                                                       |       |   |     |     |      |      |      |      |      |      |      |      |      |      |      |      |      |      |        |       |
|----------|-----------------------------------------------------------------------------------------------------------------------|-------|---|-----|-----|------|------|------|------|------|------|------|------|------|------|------|------|------|------|--------|-------|
| Q9D820-2 | Isoform 2 of Prolyl-tRNA synthetase associated domain-containing protein 1 OS=Mus musculus GN=Prorsd1 - [PRXD1_MOUSE] | 30.37 | 2 | 3   | 3   | 4    | 0.98 | 1.18 | 1.45 | 0.90 | 0.90 | 1.20 | 1.47 | 1.15 | 1.15 | 1.08 | 0.99 | 1.20 | 1.25 | 15.05  | 7.18  |
| Q9WVA2   | Mitochondrial import inner membrane translocase subunit Tim8 A OS=Mus musculus GN=Timm8a1 PE=1 SV=1 - [TIM8A_MOUSE]   | 46.39 | 1 | 4   | 4   | 29   | 0.95 | 0.91 | 0.95 | 0.95 | 0.99 | 1.02 | 1.14 | 1.15 | 1.21 | 0.96 | 1.09 | 0.91 | 1.00 | 11.04  | 5.16  |
| Q91W18-  | Isoform 2 of Tudor domain-containing protein 3 OS=Mus musculus GN=Tdrd3 - [TDRD3_MOUSE]                               | 10.34 | 3 | 6   | 6   | 10   | 0.96 | 1.06 | 1.11 | 0.90 | 0.97 | 1.14 | 1.15 | 1.15 | 1.26 | 0.98 | 1.13 | 1.05 | 1.10 | 78.97  | 9.13  |
| F8WHQ1   | Tumor protein D52 OS=Mus musculus GN=Tpd52 PE=2 SV=1 - [F8WHQ1_MOUSE]                                                 | 71.66 | 9 | 14  | 14  | 56   | 0.85 | 0.80 | 0.94 | 0.89 | 1.06 | 1.04 | 1.21 | 1.15 | 1.33 | 1.03 | 1.17 | 0.95 | 1.11 | 26.91  | 4.96  |
| P58774   | Tropomyosin beta chain OS=Mus musculus GN=Tpm2 PE=1 SV=1 - [TPM2_MOUSE]                                               | 52.46 | 6 | 3   | 21  | 190  | 1.16 | 1.13 | 1.14 | 0.91 | 0.74 | 8.61 | 8.65 | 1.15 | 0.86 | 1.37 | 1.03 | 1.10 | 0.89 | 32.82  | 4.70  |
| B2KF73   | Small EDRK-rich factor 1 OS=Mus musculus GN=Serf1 PE=4 SV=1 - [B2KF73_MOUSE]                                          | 16.67 | 3 | 1   | 1   | 1    | 0.99 | 0.90 | 0.92 | 0.81 | 0.82 | 1.10 | 1.11 | 1.15 | 1.16 | 1.04 | 1.05 | 0.86 | 0.87 | 5.66   | 10.08 |
| Q69ZS8   | Kazrin OS=Mus musculus GN=Kazn PE=1 SV=2 - [KAZRN_MOUSE]                                                              | 28.11 | 3 | 3   | 14  | 65   | 1.15 | 1.13 | 1.01 | 0.97 | 0.84 | 1.16 | 1.05 | 1.15 | 1.00 | 1.01 | 0.93 | 1.12 | 1.02 | 86.66  | 6.90  |
| Q91J43-2 | Isoform 2 of RNA binding protein fox-1 homolog 1 OS=Mus musculus GN=Rbfox1 - [RFOX1_MOUSE]                            | 21.54 | 4 | 1   | 7   | 19   | 0.91 | 1.04 | 1.14 | 0.92 | 1.01 | 1.08 | 1.19 | 1.15 | 1.26 | 0.96 | 1.06 | 1.07 | 1.17 | 40.47  | 7.33  |
| O55022   | Membrane-associated progesterone receptor component 1 OS=Mus musculus GN=Pgrmc1 PE=1 SV=4 - [PGR1_MOUSE]              | 64.62 | 1 | 8   | 10  | 176  | 1.10 | 1.04 | 0.90 | 1.01 | 0.94 | 1.21 | 1.11 | 1.15 | 1.05 | 1.24 | 1.14 | 1.15 | 1.08 | 21.68  | 4.70  |
| Q8BZJ8   | Uncharacterized protein C8orf34 homolog OS=Mus musculus PE=2 SV=1 - [CH034_MOUSE]                                     | 7.63  | 7 | 3   | 3   | 6    | 1.06 | 0.87 | 0.81 | 0.97 | 0.88 | 1.16 | 1.08 | 1.15 | 1.04 | 1.12 | 1.02 | 1.13 | 1.04 | 51.05  | 4.97  |
| P20357   | Microtubule-associated protein 2 OS=Mus musculus GN=Map2 PE=1 SV=2 - [MTAP2_MOUSE]                                    | 80.42 | 8 | 132 | 155 | 3819 | 1.07 | 0.95 | 0.91 | 0.95 | 0.90 | 1.14 | 1.07 | 1.15 | 1.07 | 1.08 | 1.01 | 1.01 | 0.97 | 199.01 | 4.91  |

|        |                                                                                                       |       |   |    |    |     |      |      |      |      |      |      |      |      |      |      |      |      |      |        |      |
|--------|-------------------------------------------------------------------------------------------------------|-------|---|----|----|-----|------|------|------|------|------|------|------|------|------|------|------|------|------|--------|------|
| Q8BL4  | Dermatan-sulfate epimerase OS=Mus musculus GN=Dse PE=2 SV=1 - [DSE_MOUSE]                             | 0.84  | 1 | 1  | 1  | 1   | 0.93 | 1.15 | 1.23 | 0.95 | 1.02 | 1.04 | 1.11 | 1.15 | 1.22 | 1.08 | 1.16 | 0.92 | 0.99 | 109.68 | 7.25 |
| Q6A065 | Centrosomal protein of 170 kDa OS=Mus musculus GN=Cep170 PE=1 SV=2 - [CE170_MOUSE]                    | 36.46 | 4 | 45 | 47 | 139 | 1.08 | 0.94 | 0.91 | 0.96 | 0.91 | 1.13 | 1.04 | 1.15 | 1.05 | 1.05 | 0.99 | 0.98 | 0.94 | 174.94 | 7.17 |
| Q8BRM2 | RAB6-interacting golgin OS=Mus musculus GN=Gorab PE=1 SV=1 - [GORAB_MOUSE]                            | 23.10 | 2 | 6  | 6  | 10  | 1.17 | 1.14 | 1.00 | 0.95 | 0.80 | 1.22 | 1.02 | 1.15 | 0.94 | 1.11 | 0.95 | 1.01 | 0.93 | 41.46  | 7.36 |
| Q61164 | Transcriptional repressor CTCF OS=Mus musculus GN=Ctcf PE=1 SV=2 - [CTCF_MOUSE]                       | 4.35  | 1 | 2  | 2  | 4   | 1.01 | 0.71 | 0.70 | 1.15 | 1.14 | 1.20 | 1.19 | 1.15 | 0.99 | 0.96 | 0.95 | 0.95 | 0.95 | 83.69  | 6.90 |
| Q68FM6 | Protein phosphatase 1 regulatory subunit 29 OS=Mus musculus GN=Elfn2 PE=1 SV=1 - [PPR29_MOUSE]        | 22.24 | 1 | 12 | 14 | 45  | 1.06 | 0.98 | 0.95 | 0.99 | 0.91 | 1.12 | 1.04 | 1.15 | 1.02 | 1.12 | 0.99 | 1.08 | 1.00 | 89.97  | 7.52 |
| F8VPL5 | Mitogen-activated protein kinase kinase kinase 4 OS=Mus musculus GN=Map4k4 PE=2 SV=1 - [F8VPL5_MOUSE] | 4.70  | 3 | 1  | 5  | 8   | 1.12 | 1.09 | 0.97 | 1.06 | 0.95 | 0.96 | 0.85 | 1.15 | 1.02 | 1.02 | 0.91 | 1.07 | 0.96 | 140.72 | 7.47 |
| D3YZ21 | Protein D430041D05Rik OS=Mus musculus GN=D430041D05Rik PE=2 SV=1 - [D3YZ21_MOUSE]                     | 14.78 | 3 | 1  | 13 | 45  | 1.05 | 0.76 | 0.73 | 0.98 | 0.94 | 1.05 | 0.99 | 1.15 | 1.09 | 1.07 | 1.02 | 1.02 | 0.98 | 153.28 | 9.39 |
| Q6NZB0 | Dnaj homolog subfamily C member 8 OS=Mus musculus GN=Dnaj8 PE=2 SV=2 - [DNJC8_MOUSE]                  | 39.13 | 7 | 10 | 10 | 39  | 0.97 | 0.76 | 0.84 | 0.96 | 0.93 | 1.08 | 1.09 | 1.15 | 1.12 | 1.03 | 1.05 | 0.91 | 0.89 | 29.79  | 9.06 |
| B1AU8  | N-alpha-acetyltransferase 10 OS=Mus musculus GN=Naa10 PE=2 SV=1 - [B1AU8_MOUSE]                       | 12.27 | 8 | 2  | 2  | 4   | 1.11 | 1.20 | 1.08 | 1.21 | 1.09 | 1.18 | 1.05 | 1.15 | 1.03 | 1.24 | 1.11 | 1.16 | 1.04 | 24.83  | 5.52 |
| Q5SXY1 | Cytosin-B OS=Mus musculus GN=Specc1 PE=1 SV=2 - [CYTSB_MOUSE]                                         | 34.49 | 3 | 27 | 29 | 120 | 0.98 | 0.92 | 0.92 | 0.91 | 0.92 | 1.12 | 1.14 | 1.15 | 1.15 | 1.04 | 1.03 | 1.03 | 1.04 | 118.03 | 6.64 |
| Q99KX1 | Myeloid leukemia factor 2 OS=Mus musculus GN=Mlf2 PE=1 SV=1 - [MLF2_MOUSE]                            | 40.89 | 1 | 6  | 6  | 34  | 0.97 | 1.07 | 1.07 | 0.99 | 1.03 | 1.10 | 1.12 | 1.15 | 1.18 | 1.11 | 1.12 | 1.08 | 1.15 | 28.04  | 6.98 |
| Q9D1X0 | Nucleolar protein 3 OS=Mus musculus GN=Nol3 PE=1 SV=1 - [NOL3_MOUSE]                                  | 53.18 | 1 | 7  | 7  | 68  | 1.00 | 1.01 | 0.96 | 0.97 | 0.94 | 1.19 | 1.15 | 1.15 | 1.09 | 1.10 | 1.10 | 1.09 | 1.07 | 24.55  | 4.07 |

|          |                                                                                                                                                      |       |   |    |    |     |      |      |      |      |      |      |      |      |      |      |      |      |      |        |       |
|----------|------------------------------------------------------------------------------------------------------------------------------------------------------|-------|---|----|----|-----|------|------|------|------|------|------|------|------|------|------|------|------|------|--------|-------|
| Q9DC29   | ATP-binding cassette sub-family B member 6, mitochondrial OS=Mus musculus GN=Abcb6 PE=1 SV=1 - [ABCB6_MOUSE]                                         | 2.38  | 1 | 1  | 1  | 2   | 0.97 | 1.37 | 1.41 | 1.57 | 1.62 | 1.03 | 1.05 | 1.15 | 1.18 | 1.03 | 1.06 | 1.07 | 1.10 | 93.71  | 8.05  |
| P70452   | Syntaxin-4 OS=Mus musculus GN=Stx4 PE=1 SV=1 - [STX4_MOUSE]                                                                                          | 25.84 | 2 | 6  | 6  | 16  | 1.08 | 1.15 | 1.10 | 1.00 | 0.94 | 1.08 | 1.05 | 1.15 | 1.09 | 1.16 | 1.15 | 1.08 | 1.10 | 34.14  | 6.14  |
| Q9CQG9   | Transmembrane protein 100 OS=Mus musculus GN=Tmem100 PE=1 SV=1 - [TM100_MOUSE]                                                                       | 6.72  | 1 | 1  | 1  | 1   | 1.08 | 0.88 | 0.81 | 0.88 | 0.81 | 1.25 | 1.15 | 1.15 | 1.06 | 1.07 | 0.99 | 1.05 | 0.97 | 14.49  | 9.50  |
| Q9D4J1   | EF-hand domain-containing protein D1 OS=Mus musculus GN=Efh1 PE=2 SV=1 - [EFHD1_MOUSE]                                                               | 37.92 | 1 | 4  | 7  | 24  | 1.26 | 1.07 | 0.87 | 1.02 | 0.79 | 1.08 | 0.82 | 1.15 | 0.92 | 0.93 | 0.80 | 0.96 | 0.87 | 26.98  | 6.02  |
| Q3UHD1   | Brain-specific angiogenesis inhibitor 1 OS=Mus musculus GN=Bai1 PE=1 SV=1 - [BAI1_MOUSE]                                                             | 10.18 | 2 | 13 | 13 | 53  | 0.98 | 1.03 | 1.03 | 0.97 | 0.97 | 1.16 | 1.14 | 1.15 | 1.17 | 0.99 | 1.02 | 0.90 | 0.94 | 173.19 | 7.56  |
| Q9CY16   | 28S ribosomal protein S28, mitochondrial OS=Mus musculus GN=Mrps28 PE=2 SV=1 - [RT28_MOUSE]                                                          | 4.84  | 1 | 1  | 1  | 2   | 0.77 | 0.87 | 1.14 | 0.75 | 0.98 | 0.93 | 1.21 | 1.15 | 1.50 | 0.83 | 1.08 | 0.92 | 1.21 | 20.51  | 8.92  |
| P47867-2 | Isoform 2 of Secretogranin-3 OS=Mus musculus GN=Scg3 - [SCG3_MOUSE]                                                                                  | 65.67 | 2 | 21 | 22 | 58  | 1.18 | 0.91 | 0.78 | 0.95 | 0.81 | 1.20 | 1.02 | 1.15 | 0.99 | 1.07 | 0.94 | 1.02 | 0.87 | 52.75  | 4.91  |
| Q9Z0H3-2 | Isoform B of SWI/SNF-related matrix-associated actin-dependent regulator of chromatin subfamily B member 1 OS=Mus musculus GN=Smarcb1 - [SNF5_MOUSE] | 10.90 | 3 | 2  | 2  | 4   | 1.25 | 1.24 | 0.98 | 1.21 | 0.96 | 1.21 | 0.96 | 1.15 | 0.91 | 1.36 | 1.09 | 1.00 | 0.80 | 43.13  | 5.64  |
| P61148   | Fibroblast growth factor 1 OS=Mus musculus GN=Fgf1 PE=2 SV=1 - [FGF1_MOUSE]                                                                          | 36.13 | 5 | 5  | 5  | 10  | 1.07 | 0.80 | 0.80 | 0.92 | 0.84 | 1.24 | 1.08 | 1.15 | 1.10 | 1.12 | 1.08 | 1.00 | 0.99 | 17.41  | 7.02  |
| Q3TGY1   | Serine/Arginine-related protein 53 OS=Mus musculus GN=Rsrc1 PE=2 SV=1 - [Q3TGY1_MOUSE]                                                               | 19.18 | 4 | 5  | 5  | 10  | 1.00 | 0.85 | 0.80 | 1.11 | 1.05 | 1.03 | 0.99 | 1.15 | 1.05 | 1.06 | 1.06 | 1.04 | 1.04 | 33.52  | 10.35 |
| Q5EBJ4   | Ermin OS=Mus musculus GN=Ermin PE=1 SV=1 - [ERMIN_MOUSE]                                                                                             | 53.38 | 1 | 13 | 13 | 217 | 0.95 | 0.94 | 0.97 | 0.86 | 0.89 | 1.17 | 1.27 | 1.15 | 1.22 | 1.06 | 1.15 | 1.01 | 1.05 | 32.13  | 4.59  |
| O35601-2 | Isoform FYB-120 of FYN-binding protein OS=Mus musculus GN=Fyb - [FYB_MOUSE]                                                                          | 6.60  | 2 | 3  | 3  | 6   | 1.01 | 0.91 | 0.97 | 1.04 | 1.01 | 1.06 | 1.06 | 1.15 | 1.11 | 1.15 | 1.12 | 1.08 | 1.04 | 84.82  | 6.71  |

|          |                                                                                                   |       |    |    |    |     |      |      |      |      |      |      |      |      |      |      |      |      |      |        |      |
|----------|---------------------------------------------------------------------------------------------------|-------|----|----|----|-----|------|------|------|------|------|------|------|------|------|------|------|------|------|--------|------|
| Q3UVU8   | Disks large-associated protein 1 OS=Mus musculus GN=Dlgap1 PE=2 SV=1 - [Q3UVU8_MOUSE]             | 17.92 | 11 | 9  | 10 | 25  | 0.96 | 0.96 | 1.05 | 1.09 | 1.11 | 0.96 | 1.08 | 1.15 | 1.13 | 0.92 | 1.03 | 0.88 | 0.98 | 70.64  | 5.58 |
| Q99JP4   | Anaphase-promoting complex subunit CDC26 OS=Mus musculus GN=Cdc26 PE=2 SV=1 - [CDC26_MOUSE]       | 60.00 | 1  | 4  | 4  | 12  | 1.12 | 1.14 | 0.97 | 0.97 | 0.85 | 1.23 | 1.13 | 1.15 | 1.08 | 1.11 | 0.98 | 1.10 | 0.98 | 9.75   | 6.81 |
| Q9DA69-  | Isoform 3 of Intraflagellar transport protein 43 homolog OS=Mus musculus GN=Ifi43 - [IFT43_MOUSE] | 13.47 | 3  | 2  | 2  | 6   | 1.16 | 0.90 | 0.93 | 0.79 | 0.83 | 1.25 | 1.07 | 1.15 | 1.10 | 1.13 | 1.17 | 1.21 | 1.04 | 21.88  | 4.70 |
| A2BI12   | PC4 and SFRS1-interacting protein OS=Mus musculus GN=Psp1 PE=2 SV=1 - [A2BI12_MOUSE]              | 65.75 | 3  | 2  | 22 | 149 | 1.10 | 0.89 | 0.81 | 0.84 | 0.84 | 1.14 | 1.14 | 1.15 | 1.20 | 1.00 | 1.04 | 0.87 | 0.79 | 36.95  | 9.23 |
| Q3TYE5   | Limbic system-associated membrane protein OS=Mus musculus GN=Lsamp PE=2 SV=1 - [Q3TYE5_MOUSE]     | 44.38 | 3  | 15 | 15 | 401 | 1.06 | 0.94 | 0.89 | 1.01 | 0.94 | 1.18 | 1.10 | 1.15 | 1.08 | 1.13 | 1.07 | 1.11 | 1.05 | 37.29  | 6.68 |
| Q62179   | Semaphorin-4B OS=Mus musculus GN=Sema4b PE=1 SV=2 - [SEM4B_MOUSE]                                 | 1.58  | 1  | 1  | 1  | 2   | 1.17 | 1.29 | 1.10 | 1.21 | 1.03 | 1.26 | 1.07 | 1.15 | 0.98 | 1.25 | 1.07 | 1.19 | 1.02 | 91.33  | 8.15 |
| Q5TI53-1 | Isoform 1 of Schwannomin-interacting protein 1 OS=Mus musculus GN=Schip1 - [SCH11_MOUSE]          | 10.96 | 5  | 3  | 3  | 5   | 1.06 | 1.04 | 0.89 | 0.97 | 0.94 | 1.37 | 1.06 | 1.15 | 0.95 | 1.23 | 1.03 | 1.45 | 1.11 | 49.95  | 5.15 |
| F8VPK8   | Protein Pcdh9 OS=Mus musculus GN=Pcdh9 PE=2 SV=1 - [F8VPK8_MOUSE]                                 | 23.12 | 1  | 18 | 18 | 50  | 0.99 | 1.09 | 1.13 | 1.02 | 1.05 | 1.12 | 1.12 | 1.15 | 1.17 | 1.04 | 1.05 | 0.99 | 0.99 | 136.06 | 5.50 |
| Q9CQ14   | Uncharacterized protein C11orf74 homolog OS=Mus musculus GN=Nwc PE=2 SV=1 - [CK074_MOUSE]         | 19.67 | 4  | 3  | 3  | 7   | 1.08 | 1.01 | 0.93 | 0.97 | 0.87 | 1.10 | 1.02 | 1.15 | 1.00 | 1.07 | 0.98 | 1.09 | 1.03 | 27.64  | 4.68 |
| P63248   | cAMP-dependent protein kinase inhibitor alpha OS=Mus musculus GN=Pkia PE=1 SV=2 - [IPKA_MOUSE]    | 71.05 | 1  | 5  | 5  | 35  | 1.05 | 0.94 | 1.07 | 0.94 | 0.85 | 1.09 | 1.02 | 1.15 | 1.06 | 1.02 | 0.94 | 1.04 | 0.96 | 7.96   | 4.54 |
| Q8K2F0   | Bromodomain-containing protein 3 OS=Mus musculus GN=Brd3 PE=1 SV=2 - [BRD3_MOUSE]                 | 14.19 | 4  | 4  | 8  | 25  | 1.07 | 0.86 | 0.85 | 0.96 | 1.05 | 1.02 | 1.00 | 1.15 | 1.12 | 1.09 | 1.05 | 1.03 | 1.06 | 79.71  | 9.36 |
| Q8BQP8   | Rab11 family-interacting protein 4 OS=Mus musculus GN=Rab11fip4 PE=1 SV=1 - [RFIP4_MOUSE]         | 5.35  | 1  | 2  | 3  | 5   | 1.10 | 1.00 | 0.90 | 0.98 | 0.89 | 1.13 | 1.02 | 1.15 | 1.04 | 1.05 | 0.96 | 1.15 | 1.04 | 71.86  | 4.84 |



|         |                                                                                                                   |       |   |    |    |     |      |      |      |      |      |      |      |      |      |      |      |      |      |        |      |
|---------|-------------------------------------------------------------------------------------------------------------------|-------|---|----|----|-----|------|------|------|------|------|------|------|------|------|------|------|------|------|--------|------|
| P43024  | Cytochrome c oxidase subunit 6A1, mitochondrial OS=Mus musculus GN=Cox6a1 PE=1 SV=2 - [CX6A1_MOUSE]               | 61.26 | 2 | 4  | 4  | 102 | 1.06 | 0.97 | 0.86 | 1.11 | 1.03 | 1.17 | 1.11 | 1.15 | 1.09 | 1.15 | 1.07 | 1.10 | 1.03 | 12.34  | 9.98 |
| Q8K3K8  | Optineurin OS=Mus musculus GN=Optn PE=1 SV=1 - [OPTN_MOUSE]                                                       | 23.63 | 1 | 12 | 12 | 26  | 1.09 | 0.96 | 0.77 | 0.91 | 0.82 | 1.14 | 1.01 | 1.15 | 0.98 | 1.08 | 1.05 | 1.05 | 0.95 | 66.98  | 5.26 |
| Q7TSJ2  | Microtubule-associated protein 6 OS=Mus musculus GN=Map6 PE=1 SV=2 - [MAP6_MOUSE]                                 | 87.20 | 4 | 91 | 91 | 926 | 1.03 | 0.88 | 0.87 | 0.92 | 0.91 | 1.15 | 1.11 | 1.15 | 1.11 | 1.05 | 1.03 | 1.00 | 0.99 | 96.39  | 9.50 |
| D3Z3U7  | Activated CDC42 kinase 1 OS=Mus musculus GN=Trk2 PE=4 SV=1 - [D3Z3U7_MOUSE]                                       | 5.09  | 7 | 2  | 2  | 4   | 0.93 | 1.05 | 1.12 | 0.96 | 1.03 | 1.11 | 1.18 | 1.15 | 1.23 | 1.00 | 1.09 | 1.18 | 1.27 | 59.11  | 7.44 |
| Q9D6S7  | Ribosome-recycling factor, mitochondrial OS=Mus musculus GN=Mrrf PE=1 SV=1 - [RRFM_MOUSE]                         | 41.98 | 1 | 7  | 7  | 45  | 1.22 | 0.91 | 0.76 | 1.04 | 0.87 | 1.18 | 0.97 | 1.15 | 0.98 | 1.14 | 0.94 | 1.15 | 0.98 | 29.03  | 9.85 |
| P62075  | Mitochondrial import inner membrane translocase subunit Tim13 OS=Mus musculus GN=Timm13 PE=1 SV=1 - [TIM13_MOUSE] | 52.63 | 1 | 4  | 4  | 46  | 0.98 | 0.96 | 0.93 | 0.94 | 0.94 | 1.08 | 1.04 | 1.15 | 1.19 | 0.98 | 1.01 | 0.92 | 0.99 | 10.45  | 8.18 |
| Q6P1D5  | Seizure 6-like protein OS=Mus musculus GN=Sez6l PE=2 SV=1 - [SE6L1_MOUSE]                                         | 16.51 | 2 | 10 | 10 | 19  | 1.10 | 1.10 | 1.04 | 1.07 | 0.96 | 1.15 | 1.04 | 1.15 | 1.07 | 1.10 | 0.96 | 1.00 | 0.98 | 104.76 | 4.69 |
| D3Z3Z3  | Voltage-dependent L-type calcium channel subunit beta-3 OS=Mus musculus GN=Cacnb3 PE=2 SV=1 - [D3Z3Z3_MOUSE]      | 22.15 | 2 | 6  | 8  | 22  | 0.94 | 1.26 | 1.27 | 0.98 | 1.04 | 1.05 | 1.19 | 1.15 | 1.22 | 0.83 | 0.89 | 0.94 | 1.02 | 54.36  | 6.54 |
| Q80VB6  | Dclk1 protein OS=Mus musculus GN=Dclk1 PE=2 SV=1 - [Q80VB6_MOUSE]                                                 | 49.31 | 2 | 1  | 16 | 50  | 0.98 | 0.89 | 0.90 | 1.02 | 1.04 | 1.05 | 1.06 | 1.15 | 1.17 | 1.12 | 1.14 | 0.95 | 0.97 | 40.36  | 9.67 |
| A6H6A9- | Isoform 3 of Rab GTPase-activating protein 1-like OS=Mus musculus GN=Rabgap11 - [RBG1L_MOUSE]                     | 31.62 | 2 | 9  | 12 | 41  | 1.10 | 1.02 | 1.00 | 0.95 | 0.86 | 1.14 | 1.10 | 1.15 | 1.03 | 1.04 | 1.02 | 1.12 | 0.97 | 42.73  | 7.33 |
| Q8CFQ9  | Fusion, derived from t(1216) malignant liposarcoma (Human) OS=Mus musculus GN=Fus PE=2 SV=1 - [Q8CFQ9_MOUSE]      | 24.76 | 5 | 9  | 12 | 198 | 1.02 | 0.91 | 0.90 | 0.92 | 0.90 | 1.18 | 1.15 | 1.15 | 1.13 | 1.09 | 1.07 | 0.96 | 0.95 | 52.57  | 9.36 |

|          |                                                                                                                     |       |   |    |    |     |      |      |      |      |      |      |      |      |      |      |      |      |      |        |      |
|----------|---------------------------------------------------------------------------------------------------------------------|-------|---|----|----|-----|------|------|------|------|------|------|------|------|------|------|------|------|------|--------|------|
| Q8BSZ2   | AP-3 complex subunit sigma-2 OS=Mus musculus GN=Ap3s2 PE=1 SV=1 - [AP3S2_MOUSE]                                     | 15.03 | 1 | 3  | 3  | 4   | 1.01 | 1.00 | 0.98 | 1.17 | 1.16 | 1.01 | 1.05 | 1.15 | 1.13 | 1.06 | 1.06 | 0.91 | 1.06 | 22.00  | 5.22 |
| Q00915   | Retinol-binding protein 1 OS=Mus musculus GN=Rbp1 PE=2 SV=2 - [RETI_MOUSE]                                          | 60.74 | 1 | 7  | 7  | 39  | 1.09 | 0.87 | 0.77 | 0.95 | 0.83 | 1.11 | 0.99 | 1.15 | 1.02 | 1.14 | 0.98 | 1.18 | 1.09 | 15.84  | 5.25 |
| Q8K354   | Carbonyl reductase [NADPH] 3 OS=Mus musculus GN=Cbr3 PE=2 SV=1 - [CBR3_MOUSE]                                       | 43.32 | 1 | 7  | 9  | 29  | 0.89 | 1.12 | 1.24 | 1.21 | 1.29 | 1.13 | 1.22 | 1.15 | 1.24 | 1.18 | 1.31 | 1.34 | 1.52 | 30.93  | 6.57 |
| H3BL68   | PAB-dependent poly(A)-specific ribonuclease subunit 3 (Fragment) OS=Mus musculus GN=Pan3 PE=4 SV=1 - [H3BL68_MOUSE] | 10.93 | 4 | 1  | 1  | 2   | 1.03 | 1.16 | 1.13 | 0.97 | 0.94 | 1.16 | 1.12 | 1.15 | 1.12 | 1.15 | 1.11 | 1.09 | 1.06 | 19.04  | 6.77 |
| P15327   | Bisphosphoglycerate mutase OS=Mus musculus GN=Bpgm PE=2 SV=2 - [PMGE_MOUSE]                                         | 15.44 | 4 | 3  | 3  | 8   | 0.98 | 1.47 | 1.53 | 0.96 | 1.03 | 1.13 | 1.12 | 1.15 | 1.17 | 1.18 | 1.22 | 1.16 | 1.17 | 29.96  | 7.06 |
| P09405   | Nucleolin OS=Mus musculus GN=Ncl PE=1 SV=2 - [NUCL_MOUSE]                                                           | 44.55 | 1 | 38 | 38 | 347 | 1.03 | 0.82 | 0.80 | 0.96 | 0.92 | 1.18 | 1.14 | 1.15 | 1.12 | 1.07 | 1.02 | 0.96 | 0.94 | 76.68  | 4.75 |
| Q6NS82-2 | Isoform 2 of Protein FAM134A OS=Mus musculus GN=Fam134a - [F134A_MOUSE]                                             | 13.67 | 3 | 2  | 2  | 10  | 1.50 | 1.15 | 0.71 | 1.14 | 0.72 | 1.31 | 0.75 | 1.15 | 0.81 | 1.02 | 0.72 | 1.19 | 0.86 | 29.58  | 4.23 |
| O35226   | 26S proteasome non-ATPase regulatory subunit 4 OS=Mus musculus GN=Psm4 PE=1 SV=1 - [PSMD4_MOUSE]                    | 30.59 | 2 | 1  | 10 | 36  | 0.96 | 0.52 | 0.54 | 0.72 | 0.75 | 1.15 | 1.19 | 1.15 | 1.20 | 1.28 | 1.34 | 1.20 | 1.25 | 40.68  | 4.79 |
| F6X2H0   | E3 ubiquitin-protein ligase TRIM41 (Fragment) OS=Mus musculus GN=Trim41 PE=4 SV=1 - [F6X2H0_MOUSE]                  | 10.19 | 2 | 1  | 1  | 2   | 1.03 | 1.13 | 1.09 | 0.99 | 0.97 | 0.99 | 0.95 | 1.15 | 1.12 | 1.05 | 1.02 | 1.20 | 1.17 | 17.98  | 4.93 |
| P27773   | Protein disulfide-isomerase A3 OS=Mus musculus GN=Pdia3 PE=1 SV=2 - [PDI3_MOUSE]                                    | 62.38 | 2 | 33 | 33 | 276 | 0.96 | 0.82 | 0.87 | 0.88 | 0.93 | 1.08 | 1.13 | 1.15 | 1.20 | 1.02 | 1.08 | 0.96 | 1.03 | 56.64  | 6.21 |
| E9Q6R4   | Protein Arid1b OS=Mus musculus GN=Arid1b PE=2 SV=1 - [E9Q6R4_MOUSE]                                                 | 3.21  | 3 | 5  | 5  | 8   | 1.16 | 1.01 | 0.82 | 1.07 | 1.06 | 1.24 | 1.05 | 1.15 | 1.00 | 1.21 | 1.01 | 1.22 | 1.10 | 236.87 | 6.80 |
| Q921C5   | Protein bicaudal D homolog 2 OS=Mus musculus GN=Bicd2 PE=1 SV=1 - [BICD2_MOUSE]                                     | 13.66 | 4 | 8  | 8  | 14  | 0.94 | 0.96 | 1.21 | 0.82 | 0.97 | 1.13 | 1.30 | 1.16 | 1.36 | 1.04 | 1.14 | 1.01 | 1.02 | 93.33  | 5.44 |

|          |                                                                                                |       |    |    |    |     |      |      |      |      |      |      |      |      |      |      |      |      |      |        |       |
|----------|------------------------------------------------------------------------------------------------|-------|----|----|----|-----|------|------|------|------|------|------|------|------|------|------|------|------|------|--------|-------|
| Q6A0A2-  | Isoform 2 of La-related protein 4B OS=Mus musculus GN=Larp4b - [LAR4B_MOUSE]                   | 9.44  | 3  | 5  | 5  | 11  | 1.01 | 1.12 | 1.07 | 0.94 | 0.92 | 1.07 | 1.04 | 1.16 | 1.16 | 1.05 | 1.03 | 1.04 | 1.05 | 72.49  | 6.23  |
| Q9DCJ7   | Aurora kinase A-interacting protein OS=Mus musculus GN=Aurkaip1 PE=2 SV=2 - [AKIP_MOUSE]       | 5.00  | 1  | 1  | 1  | 1   | 0.86 | 0.77 | 0.90 | 0.92 | 1.07 | 1.04 | 1.21 | 1.16 | 1.34 | 1.09 | 1.27 | 1.00 | 1.17 | 23.29  | 10.73 |
| F6ZDS4   | Nucleoprotein TPR OS=Mus musculus GN=Tpr PE=1 SV=1 - [TPR_MOUSE]                               | 40.85 | 7  | 86 | 87 | 257 | 1.03 | 0.89 | 0.87 | 0.93 | 0.92 | 1.16 | 1.13 | 1.16 | 1.15 | 1.03 | 1.03 | 0.97 | 0.97 | 273.82 | 5.03  |
| Q6P9K8   | Caskin-1 OS=Mus musculus GN=Caskin1 PE=1 SV=2 - [CSK11_MOUSE]                                  | 34.94 | 4  | 33 | 33 | 132 | 0.98 | 0.97 | 0.99 | 0.95 | 0.98 | 1.10 | 1.13 | 1.16 | 1.20 | 1.10 | 1.10 | 1.03 | 1.04 | 150.40 | 9.17  |
| Q9DCB4   | cAMP-regulated phosphoprotein 21 OS=Mus musculus GN=Arpp21 PE=1 SV=2 - [ARP21_MOUSE]           | 10.53 | 16 | 3  | 7  | 48  | 1.07 | 1.02 | 0.94 | 1.09 | 1.02 | 1.20 | 1.02 | 1.16 | 1.09 | 1.06 | 0.99 | 1.16 | 1.09 | 88.51  | 7.39  |
| Q8BLH7   | HIRA-interacting protein 3 OS=Mus musculus GN=Hirip3 PE=1 SV=1 - [HIRP3_MOUSE]                 | 7.99  | 1  | 3  | 3  | 7   | 1.05 | 1.12 | 1.11 | 0.96 | 0.97 | 1.21 | 1.20 | 1.16 | 1.05 | 1.08 | 1.09 | 0.98 | 1.00 | 65.18  | 7.84  |
| Q9EQM6   | Microprocessor complex subunit DGCR8 OS=Mus musculus GN=Dger8 PE=2 SV=2 - [DGCR8_MOUSE]        | 2.59  | 1  | 1  | 1  | 2   | 0.87 | 0.86 | 0.99 | 0.94 | 1.08 | 0.99 | 1.13 | 1.16 | 1.33 | 1.11 | 1.28 | 0.91 | 1.05 | 86.27  | 6.06  |
| J3QP80   | MCGI5559 OS=Mus musculus GN=Gm5814 PE=4 SV=1 - [J3QP80_MOUSE]                                  | 42.40 | 2  | 4  | 4  | 9   | 1.09 | 0.99 | 0.92 | 0.95 | 0.90 | 1.14 | 1.04 | 1.16 | 1.09 | 1.04 | 0.95 | 1.00 | 0.85 | 14.15  | 4.86  |
| Q8BPU7   | Engulfment and cell motility protein 1 OS=Mus musculus GN=Elmo1 PE=1 SV=2 - [ELMO1_MOUSE]      | 6.33  | 4  | 3  | 5  | 8   | 0.93 | 0.92 | 0.94 | 0.92 | 0.99 | 1.09 | 1.20 | 1.16 | 1.25 | 1.11 | 1.20 | 1.03 | 1.11 | 83.88  | 6.28  |
| Q9D8B3   | Charged multivesicular body protein 4b OS=Mus musculus GN=Chmp4b PE=2 SV=2 - [CHM4B_MOUSE]     | 54.02 | 1  | 13 | 13 | 104 | 1.04 | 0.83 | 0.81 | 0.93 | 0.92 | 1.18 | 1.12 | 1.16 | 1.11 | 1.08 | 1.06 | 0.98 | 0.91 | 24.92  | 4.82  |
| F7BJK1   | Protein Pedh1 (Fragment) OS=Mus musculus GN=Pedh1 PE=2 SV=1 - [F7BJK1_MOUSE]                   | 43.83 | 1  | 24 | 30 | 209 | 1.03 | 1.08 | 1.04 | 0.97 | 0.96 | 1.14 | 1.10 | 1.16 | 1.12 | 1.14 | 1.11 | 1.15 | 1.09 | 116.45 | 5.08  |
| Q8BKE9   | Intraflagellar transport protein 74 homolog OS=Mus musculus GN=Ifi74 PE=1 SV=2 - [IFT74_MOUSE] | 19.67 | 2  | 9  | 9  | 22  | 1.03 | 0.79 | 0.84 | 0.94 | 0.87 | 1.16 | 1.05 | 1.16 | 1.06 | 1.01 | 0.92 | 0.98 | 0.93 | 69.26  | 6.00  |
| Q8BL48-2 | Isoform 2 of RING finger protein unkempt homolog OS=Mus musculus GN=Unk - [UNK_MOUSE]          | 11.92 | 2  | 6  | 8  | 19  | 1.02 | 1.17 | 1.16 | 0.97 | 0.87 | 0.98 | 0.91 | 1.16 | 1.08 | 1.05 | 1.07 | 0.97 | 0.97 | 86.76  | 6.92  |

|         |                                                                                                                |       |    |    |    |     |      |      |      |      |      |      |      |      |      |      |      |      |      |       |       |
|---------|----------------------------------------------------------------------------------------------------------------|-------|----|----|----|-----|------|------|------|------|------|------|------|------|------|------|------|------|------|-------|-------|
| P97450  | ATP synthase-coupling factor 6, mitochondrial OS=Mus musculus GN=Atp5j PE=1 SV=1 - [ATP5J_MOUSE]               | 42.59 | 2  | 6  | 6  | 174 | 1.02 | 1.00 | 0.98 | 0.94 | 0.93 | 1.09 | 1.08 | 1.16 | 1.12 | 1.08 | 1.02 | 1.04 | 1.00 | 12.49 | 9.36  |
| I6L974  | TBC1 domain family member 17 OS=Mus musculus GN=Tbcd17 PE=2 SV=1 - [I6L974_MOUSE]                              | 2.01  | 2  | 1  | 1  | 1   | 1.13 | 3.56 | 3.15 | 1.16 | 1.02 | 1.00 | 0.88 | 1.16 | 1.02 | 1.22 | 1.08 | 1.42 | 1.26 | 62.06 | 5.91  |
| E9Q942  | Small integral membrane protein 13 OS=Mus musculus GN=Smim13 PE=3 SV=1 - [SIM13_MOUSE]                         | 44.32 | 1  | 2  | 2  | 11  | 0.96 | 0.99 | 1.03 | 0.92 | 0.96 | 1.12 | 1.34 | 1.16 | 1.13 | 1.09 | 1.20 | 0.81 | 1.07 | 9.95  | 6.27  |
| Q9DCT5  | Stromal cell-derived factor 2 OS=Mus musculus GN=Sdf2 PE=2 SV=1 - [SDF2_MOUSE]                                 | 25.12 | 1  | 3  | 3  | 19  | 0.96 | 0.85 | 0.83 | 0.89 | 0.93 | 1.06 | 1.07 | 1.16 | 1.20 | 1.11 | 1.09 | 1.06 | 1.04 | 23.14 | 7.33  |
| Q99P15  | Phosphatidate phosphatase LPIN2 OS=Mus musculus GN=Lpin2 PE=1 SV=2 - [LPIN2_MOUSE]                             | 5.04  | 4  | 3  | 4  | 6   | 1.06 | 1.04 | 1.04 | 0.93 | 0.88 | 1.09 | 0.97 | 1.16 | 1.10 | 1.10 | 1.05 | 1.03 | 1.06 | 99.55 | 5.47  |
| P56394  | Cytochrome c oxidase copper chaperone OS=Mus musculus GN=Cox17 PE=2 SV=2 - [COX17_MOUSE]                       | 20.63 | 1  | 1  | 1  | 10  | 1.05 | 0.49 | 0.45 | 0.97 | 0.84 | 1.25 | 1.07 | 1.16 | 1.05 | 1.05 | 0.90 | 0.87 | 0.79 | 6.78  | 7.69  |
| A2AQ44  | Formin-binding protein 1 OS=Mus musculus GN=Fbnp1 PE=2 SV=1 - [A2AQ44_MOUSE]                                   | 25.04 | 13 | 12 | 12 | 18  | 0.94 | 0.98 | 1.13 | 0.84 | 0.91 | 1.09 | 1.13 | 1.16 | 1.26 | 1.06 | 1.17 | 1.02 | 1.11 | 65.14 | 5.27  |
| Q8CC27~ | Isoform 4 of Voltage-dependent L-type calcium channel subunit beta-2 OS=Mus musculus GN=Cacnb2 - [CACB2_MOUSE] | 10.82 | 4  | 2  | 4  | 16  | 0.99 | 1.08 | 1.08 | 1.09 | 1.06 | 0.99 | 1.06 | 1.16 | 1.15 | 1.23 | 1.30 | 1.61 | 1.62 | 64.67 | 9.07  |
| Q9Z2E1  | Methyl-CpG-binding domain protein 2 OS=Mus musculus GN=Mbd2 PE=2 SV=2 - [MBD2_MOUSE]                           | 16.91 | 2  | 6  | 7  | 10  | 1.08 | 0.83 | 0.91 | 0.93 | 0.89 | 1.15 | 1.12 | 1.16 | 1.04 | 1.16 | 1.00 | 0.86 | 0.91 | 43.47 | 10.04 |
| Q9CR00  | 26S proteasome non-ATPase regulatory subunit 9 OS=Mus musculus GN=Psm9 PE=1 SV=1 - [PSMD9_MOUSE]               | 45.95 | 1  | 10 | 10 | 68  | 1.09 | 1.05 | 0.94 | 0.95 | 0.90 | 1.11 | 1.07 | 1.16 | 1.05 | 1.08 | 1.03 | 1.06 | 1.00 | 24.70 | 6.43  |
| Q9JMG1  | Endothelial differentiation-related factor 1 OS=Mus musculus GN=Edf1 PE=1 SV=1 - [EDF1_MOUSE]                  | 42.57 | 1  | 7  | 7  | 37  | 1.07 | 0.85 | 0.86 | 0.94 | 0.93 | 1.12 | 1.06 | 1.16 | 1.06 | 1.10 | 1.02 | 0.99 | 0.95 | 16.36 | 9.99  |

|        |                                                                                                                     |       |   |    |    |     |      |      |      |      |      |      |      |      |      |      |      |      |      |        |      |
|--------|---------------------------------------------------------------------------------------------------------------------|-------|---|----|----|-----|------|------|------|------|------|------|------|------|------|------|------|------|------|--------|------|
| Q8BKX1 | Isoform 3 of Brain-specific angiogenesis inhibitor 1-associated protein 2 OS=Mus musculus GN=Baiap2 - [BAIP2_MOUSE] | 63.55 | 4 | 2  | 26 | 134 | 1.31 | 0.99 | 0.80 | 1.03 | 0.81 | 1.33 | 1.03 | 1.16 | 1.22 | 1.01 | 1.14 | 1.05 | 0.98 | 56.83  | 8.97 |
| E9PYL2 | Protein Prr12 OS=Mus musculus GN=Prr12 PE=2 SV=1 - [E9PYL2_MOUSE]                                                   | 3.98  | 1 | 4  | 4  | 9   | 0.95 | 0.95 | 0.99 | 0.97 | 1.02 | 1.26 | 1.35 | 1.16 | 1.25 | 1.11 | 1.12 | 0.96 | 1.00 | 211.75 | 7.65 |
| P63166 | Small ubiquitin-related modifier 1 OS=Mus musculus GN=Sumo1 PE=1 SV=1 - [SUMO1_MOUSE]                               | 20.79 | 1 | 2  | 2  | 6   | 1.02 | 1.02 | 0.89 | 0.82 | 0.96 | 1.08 | 1.26 | 1.16 | 1.20 | 0.96 | 0.94 | 0.90 | 1.03 | 11.55  | 5.52 |
| Q8R1K1 | Ubiquitin-associated domain-containing protein 2 OS=Mus musculus GN=Ubac2 PE=2 SV=1 - [UBAC2_MOUSE]                 | 4.64  | 1 | 1  | 1  | 1   | 1.36 | 0.91 | 0.67 | 1.48 | 1.09 | 0.98 | 0.72 | 1.16 | 0.85 | 0.83 | 0.61 | 0.93 | 0.69 | 39.03  | 9.44 |
| Q3UCQ1 | Forkhead box protein K2 OS=Mus musculus GN=Foxk2 PE=2 SV=3 - [FOXK2_MOUSE]                                          | 6.14  | 2 | 2  | 2  | 4   | 0.98 | 1.03 | 1.05 | 0.99 | 1.01 | 1.04 | 1.05 | 1.16 | 1.18 | 1.08 | 1.10 | 1.09 | 1.11 | 68.40  | 9.51 |
| Q9CZH7 | Matrix-remodeling-associated protein 7 OS=Mus musculus GN=Mxra7 PE=1 SV=2 - [MXRA7_MOUSE]                           | 19.66 | 2 | 2  | 2  | 6   | 0.90 | 0.71 | 1.13 | 1.05 | 0.79 | 1.08 | 1.20 | 1.16 | 1.28 | 1.08 | 1.20 | 1.10 | 0.96 | 19.45  | 4.26 |
| B1AU75 | Nuclear autoantigenic sperm protein OS=Mus musculus GN=Nasp PE=4 SV=1 - [B1AU75_MOUSE]                              | 19.40 | 9 | 11 | 12 | 16  | 0.95 | 0.98 | 1.15 | 0.89 | 1.05 | 1.09 | 1.08 | 1.16 | 1.22 | 1.03 | 1.10 | 0.91 | 0.93 | 83.96  | 4.37 |
| F8VQ40 | Laminin subunit alpha-1 OS=Mus musculus GN=Lama1 PE=4 SV=1 - [F8VQ40_MOUSE]                                         | 0.68  | 2 | 1  | 1  | 2   | 0.81 | 1.23 | 1.51 | 1.01 | 1.24 | 0.90 | 1.10 | 1.16 | 1.42 | 0.90 | 1.11 | 0.97 | 1.20 | 337.93 | 6.71 |
| Q0VGU4 | MCG18019 OS=Mus musculus GN=Vgf PE=2 SV=1 - [Q0VGU4_MOUSE]                                                          | 68.40 | 1 | 33 | 33 | 184 | 1.17 | 1.03 | 0.88 | 0.99 | 0.81 | 1.20 | 1.01 | 1.16 | 1.01 | 1.19 | 1.02 | 1.14 | 1.00 | 68.19  | 4.70 |
| Q8R0S4 | Voltage-dependent L-type calcium channel subunit beta-4 OS=Mus musculus GN=Cacnb4 PE=1 SV=2 - [CACB4_MOUSE]         | 27.36 | 4 | 7  | 12 | 28  | 0.97 | 1.04 | 1.09 | 1.03 | 1.00 | 1.05 | 1.04 | 1.16 | 1.21 | 1.09 | 1.11 | 1.17 | 1.18 | 57.91  | 9.28 |
| Q9Z0U1 | Tight junction protein ZO-2 OS=Mus musculus GN=Tjp2 PE=1 SV=2 - [ZO2_MOUSE]                                         | 25.96 | 1 | 25 | 25 | 41  | 0.96 | 0.92 | 0.99 | 0.86 | 0.88 | 1.08 | 1.10 | 1.16 | 1.16 | 1.02 | 1.07 | 1.01 | 0.99 | 131.20 | 6.79 |

|          |                                                                                                                             |       |   |    |    |     |      |      |      |      |      |      |      |      |      |      |      |      |      |        |      |
|----------|-----------------------------------------------------------------------------------------------------------------------------|-------|---|----|----|-----|------|------|------|------|------|------|------|------|------|------|------|------|------|--------|------|
| Q8C6B2-2 | Isoform 2 of Rhotekin OS=Mus musculus GN=Rtkn - [RTKN_MOUSE]                                                                | 7.44  | 4 | 2  | 3  | 5   | 0.90 | 0.99 | 1.10 | 1.07 | 1.20 | 0.90 | 1.00 | 1.16 | 1.29 | 1.05 | 1.17 | 1.12 | 1.25 | 61.52  | 6.00 |
| Q70400   | PDZ and LIM domain protein 1 OS=Mus musculus GN=Pdlim1 PE=2 SV=4 - [PDL1_MOUSE]                                             | 42.81 | 1 | 12 | 12 | 25  | 0.86 | 0.96 | 1.12 | 0.85 | 0.93 | 1.19 | 1.34 | 1.16 | 1.26 | 1.01 | 1.14 | 0.91 | 1.03 | 35.75  | 6.84 |
| E9Q505   | Amyloid beta A4 precursor protein-binding family A member 2 OS=Mus musculus GN=Apha2 PE=2 SV=1 - [E9Q505_MOUSE]             | 9.76  | 5 | 5  | 6  | 17  | 1.09 | 0.98 | 0.99 | 1.12 | 1.07 | 1.17 | 1.10 | 1.16 | 1.13 | 1.14 | 1.15 | 1.04 | 0.97 | 81.32  | 4.78 |
| Q99KG3-2 | Isoform 2 of RNA-binding protein 10 OS=Mus musculus GN=Rbm10 - [RBM10_MOUSE]                                                | 15.47 | 3 | 10 | 11 | 19  | 0.97 | 0.97 | 0.87 | 0.97 | 0.90 | 1.06 | 1.04 | 1.16 | 1.12 | 1.06 | 0.95 | 0.97 | 0.97 | 94.37  | 6.70 |
| O35551   | Rab GTPase-binding effector protein 1 OS=Mus musculus GN=Rabep1 PE=1 SV=2 - [RABE1_MOUSE]                                   | 52.78 | 8 | 47 | 48 | 182 | 0.98 | 0.84 | 0.89 | 0.88 | 0.89 | 1.12 | 1.15 | 1.16 | 1.16 | 0.99 | 1.03 | 0.92 | 0.96 | 99.46  | 5.01 |
| D3YU00   | STAR-related lipid transfer (START) domain containing 5, isoform CRA_a OS=Mus musculus GN=Stard5 PE=4 SV=1 - [D3YU00_MOUSE] | 4.37  | 2 | 1  | 1  | 2   | 1.28 | 0.88 | 0.68 | 1.03 | 0.80 | 1.02 | 0.79 | 1.16 | 0.90 | 1.03 | 0.81 | 1.30 | 1.02 | 23.15  | 5.45 |
| Q80YT7-2 | Isoform 2 of Myomegalin OS=Mus musculus GN=Pde4dip - [MYOME_MOUSE]                                                          | 5.19  | 5 | 4  | 4  | 6   | 0.89 | 1.09 | 1.22 | 0.90 | 1.01 | 1.14 | 1.27 | 1.16 | 1.29 | 1.27 | 1.42 | 1.14 | 1.29 | 126.54 | 5.34 |
| Q99MQ5   | Collagen alpha-1(XV) chain OS=Mus musculus GN=Col25a1 PE=2 SV=2 - [COPA1_MOUSE]                                             | 7.81  | 2 | 2  | 2  | 5   | 0.84 | 1.00 | 1.02 | 0.98 | 1.02 | 1.25 | 0.97 | 1.16 | 1.26 | 1.19 | 1.10 | 1.18 | 1.29 | 65.34  | 8.51 |
| Q99N69   | Leupaxin OS=Mus musculus GN=Lpxn PE=1 SV=2 - [LPXN_MOUSE]                                                                   | 5.96  | 1 | 2  | 2  | 3   | 1.06 | 0.98 | 0.92 | 1.00 | 0.94 | 1.18 | 1.10 | 1.16 | 1.09 | 1.10 | 1.04 | 1.09 | 1.03 | 43.45  | 6.43 |
| Q8R5L1   | Complement component 1 Q subcomponent-binding protein, mitochondrial OS=Mus musculus GN=C1qbp PE=2 SV=1 - [Q8R5L1_MOUSE]    | 61.65 | 2 | 10 | 10 | 548 | 1.01 | 0.85 | 0.85 | 0.93 | 0.92 | 1.16 | 1.15 | 1.16 | 1.13 | 1.05 | 1.04 | 0.99 | 0.97 | 31.01  | 4.87 |
| Q9Z315   | U4/U6.U5 tri-snRNP-associated protein 1 OS=Mus musculus GN=Sart1 PE=2 SV=1 [SNUT1_MOUSE]                                    | 45.04 | 1 | 26 | 26 | 68  | 1.09 | 1.06 | 0.89 | 1.04 | 0.95 | 1.17 | 1.10 | 1.16 | 1.06 | 1.12 | 1.04 | 1.09 | 0.98 | 90.83  | 5.82 |
| B1AV75   | Protein 2610301B20Rik OS=Mus musculus GN=2610301B20Rik PE=2 SV=1 - [B1AV75_MOUSE]                                           | 50.48 | 1 | 1  | 9  | 44  | 1.10 | 0.83 | 0.76 | 1.09 | 0.99 | 1.26 | 1.14 | 1.16 | 1.05 | 1.16 | 1.06 | 1.23 | 1.12 | 23.92  | 6.86 |

|        |                                                                                                                 |       |   |    |    |     |      |      |      |      |      |      |      |      |      |      |      |      |      |        |      |
|--------|-----------------------------------------------------------------------------------------------------------------|-------|---|----|----|-----|------|------|------|------|------|------|------|------|------|------|------|------|------|--------|------|
| Q3TML0 | Protein disulfide-isomerase A6 OS=Mus musculus GN=Pdia6 PE=2 SV=1 - [Q3TML0_MOUSE]                              | 33.48 | 2 | 11 | 11 | 26  | 1.02 | 0.89 | 0.87 | 1.02 | 1.00 | 1.03 | 1.17 | 1.16 | 1.17 | 1.08 | 1.13 | 1.10 | 1.24 | 48.66  | 5.19 |
| Q78WH7 | Calcium/calmodulin-dependent protein kinase II inhibitor 2 OS=Mus musculus GN=Camk2n2 PE=2 SV=1 - [CK2N2_MOUSE] | 54.43 | 1 | 2  | 4  | 25  | 1.06 | 0.91 | 0.83 | 0.95 | 0.89 | 1.13 | 1.04 | 1.16 | 1.06 | 1.02 | 0.94 | 1.05 | 0.95 | 8.62   | 5.48 |
| Q6P9J5 | KN motif and ankyrin repeat domain-containing protein 4 OS=Mus musculus GN=Kank4 PE=2 SV=1 - [KANK4_MOUSE]      | 11.02 | 3 | 6  | 6  | 11  | 0.93 | 0.79 | 0.85 | 0.95 | 0.98 | 1.05 | 1.09 | 1.16 | 1.21 | 1.05 | 1.15 | 1.03 | 1.13 | 110.34 | 4.88 |
| Q9DBN4 | Putative monooxygenase p33MONOX OS=Mus musculus GN=P33monox PE=1 SV=1 - [P33MX_MOUSE]                           | 47.52 | 7 | 8  | 8  | 21  | 1.03 | 0.79 | 0.82 | 0.94 | 0.85 | 1.14 | 1.12 | 1.16 | 1.11 | 1.13 | 1.03 | 1.06 | 0.96 | 32.69  | 9.42 |
| Q8CIP4 | MAP/microtubule affinity-regulating kinase 4 OS=Mus musculus GN=Mark4 PE=1 SV=1 - [MARK4_MOUSE]                 | 5.98  | 1 | 1  | 3  | 6   | 0.98 | 1.48 | 1.51 | 0.99 | 1.02 | 1.00 | 1.02 | 1.16 | 1.18 | 1.15 | 1.18 | 1.16 | 1.19 | 82.59  | 9.67 |
| Q8C120 | SH3 domain-containing RING finger protein 3 OS=Mus musculus GN=Sh3rf3 PE=2 SV=2 - [SH3R3_MOUSE]                 | 2.73  | 3 | 1  | 3  | 3   | 0.95 | 0.62 | 0.65 | 1.00 | 1.05 | 1.14 | 1.19 | 1.16 | 1.22 | 0.97 | 1.02 | 0.96 | 1.01 | 93.07  | 8.53 |
| E9QP85 | Protein Dos OS=Mus musculus GN=Dos PE=4 SV=1 - [E9QP85_MOUSE]                                                   | 29.23 | 4 | 15 | 15 | 33  | 1.17 | 1.04 | 0.95 | 1.01 | 0.83 | 1.14 | 0.98 | 1.16 | 1.04 | 1.15 | 1.02 | 1.13 | 1.03 | 74.09  | 6.33 |
| Q8C525 | Protein MB21D2 OS=Mus musculus GN=Mb21d2 PE=1 SV=1 - [M21D2_MOUSE]                                              | 3.74  | 2 | 1  | 1  | 2   | 0.89 | 1.04 | 1.17 | 1.11 | 1.25 | 0.76 | 0.85 | 1.16 | 1.30 | 1.05 | 1.18 | 1.06 | 1.19 | 48.45  | 7.68 |
| P30275 | Creatine kinase U-type, mitochondrial OS=Mus musculus GN=Ckmt1 PE=1 SV=1 - [KCRU_MOUSE]                         | 60.29 | 5 | 18 | 20 | 217 | 1.01 | 0.98 | 0.98 | 1.03 | 1.03 | 1.15 | 1.12 | 1.16 | 1.15 | 1.08 | 1.08 | 1.11 | 1.10 | 46.97  | 8.16 |
| A2ADB1 | Msx2-interacting protein OS=Mus musculus GN=Spen PE=2 SV=1 - [A2ADB1_MOUSE]                                     | 1.49  | 5 | 4  | 4  | 7   | 1.05 | 1.26 | 1.20 | 0.94 | 0.90 | 0.94 | 0.86 | 1.16 | 1.11 | 0.92 | 0.77 | 1.05 | 1.01 | 395.74 | 8.56 |
| J3QQ18 | Ras GTPase-activating protein SynGAP OS=Mus musculus GN=Syngap1 PE=4 SV=1 - [J3QQ18_MOUSE]                      | 36.01 | 4 | 1  | 35 | 159 | 0.98 | 1.12 | 1.13 | 1.02 | 1.02 | 1.16 | 1.19 | 1.16 | 1.18 | 1.02 | 0.99 | 1.01 | 1.06 | 144.78 | 9.01 |

|        |                                                                                                               |       |   |    |    |     |      |      |      |      |      |      |      |      |      |      |      |      |      |        |      |
|--------|---------------------------------------------------------------------------------------------------------------|-------|---|----|----|-----|------|------|------|------|------|------|------|------|------|------|------|------|------|--------|------|
| Q3UDR8 | Protein YIPF3<br>OS=Mus musculus<br>GN=Yipf3 PE=1 SV=1<br>-[YIPF3_MOUSE]                                      | 6.92  | 1 | 1  | 1  | 2   | 1.07 | 1.04 | 0.97 | 1.01 | 0.94 | 1.05 | 0.98 | 1.16 | 1.08 | 1.17 | 1.10 | 1.15 | 1.08 | 37.97  | 5.94 |
| D3Z2W0 | TNFAIP3-interacting<br>protein 1 OS=Mus<br>musculus GN=Tnip1<br>PE=2 SV=1 -<br>[D3Z2W0_MOUSE]                 | 18.27 | 7 | 8  | 8  | 16  | 1.06 | 0.94 | 0.94 | 0.91 | 0.84 | 1.16 | 1.07 | 1.16 | 1.06 | 1.09 | 1.01 | 0.98 | 0.90 | 72.89  | 6.30 |
| Q99LW6 | YY1-associated factor<br>2 OS=Mus musculus<br>GN=Yaf2 PE=1 SV=1 -<br>[YAF2_MOUSE]                             | 13.41 | 1 | 1  | 1  | 9   | 0.82 | 0.84 | 1.50 | 1.15 | 1.41 | 1.05 | 1.67 | 1.16 | 1.51 | 1.14 | 1.61 | 0.87 | 1.07 | 19.64  | 9.58 |
| Q9D0L1 | Zinc finger BED<br>domain-containing<br>protein 3 OS=Mus<br>musculus GN=Zbed3<br>PE=1 SV=1 -<br>[ZBED3_MOUSE] | 4.39  | 1 | 1  | 1  | 3   | 1.11 | 1.00 | 1.04 | 0.88 | 0.66 | 1.24 | 0.87 | 1.16 | 1.13 | 1.10 | 0.98 | 1.22 | 0.88 | 25.59  | 6.54 |
| Q6PCP5 | Mitochondrial fission<br>factor OS=Mus<br>musculus GN=Mff<br>PE=1 SV=1 -<br>[MFF_MOUSE]                       | 58.42 | 7 | 8  | 11 | 27  | 0.99 | 0.99 | 0.99 | 1.01 | 1.00 | 1.22 | 1.18 | 1.16 | 1.18 | 1.24 | 1.21 | 1.17 | 1.17 | 32.91  | 6.83 |
| Q14BB9 | MAP6 domain-<br>containing protein 1<br>OS=Mus musculus<br>GN=Map6d1 PE=1<br>SV=1 -<br>[MA6D1_MOUSE]          | 59.69 | 1 | 6  | 6  | 11  | 0.81 | 0.95 | 1.29 | 0.92 | 1.13 | 0.97 | 1.19 | 1.16 | 1.54 | 1.00 | 1.47 | 0.96 | 1.24 | 20.42  | 9.88 |
| F8WHT3 | Protein PRRC2B<br>OS=Mus musculus<br>GN=Prc2b PE=2<br>SV=1 -<br>[F8WHT3_MOUSE]                                | 24.98 | 4 | 13 | 35 | 93  | 1.02 | 1.08 | 1.15 | 1.00 | 1.03 | 1.21 | 1.13 | 1.16 | 1.16 | 1.18 | 1.13 | 1.13 | 1.07 | 242.97 | 8.47 |
| Q8BP92 | Reticulocalbin-2<br>OS=Mus musculus<br>GN=Rcn2 PE=2 SV=1<br>[RCN2_MOUSE]                                      | 68.44 | 2 | 17 | 17 | 337 | 1.13 | 0.91 | 0.80 | 0.96 | 0.86 | 1.16 | 1.03 | 1.16 | 1.02 | 1.10 | 0.98 | 1.01 | 0.92 | 37.25  | 4.42 |
| Q9ESX4 | Isoform 2 of Nucleolar<br>protein of 40 kDa<br>OS=Mus musculus<br>GN=Zcche17 -<br>[NO40_MOUSE]                | 15.03 | 2 | 2  | 2  | 7   | 1.02 | 1.08 | 0.85 | 1.17 | 1.00 | 0.95 | 0.91 | 1.16 | 0.97 | 0.95 | 0.97 | 0.94 | 0.92 | 22.10  | 9.69 |
| E9Q3M9 | Protein<br>2010300C2Rik<br>OS=Mus musculus<br>GN=2010300C2Rik<br>PE=2 SV=1 -<br>[E9Q3M9_MOUSE]                | 60.68 | 2 | 17 | 47 | 252 | 1.09 | 1.11 | 1.02 | 1.05 | 0.92 | 1.23 | 1.10 | 1.16 | 1.07 | 1.20 | 1.09 | 1.28 | 1.15 | 125.83 | 7.37 |
| Q505F5 | Leucine-rich repeat-<br>containing protein 47<br>OS=Mus musculus<br>GN=Lrc47 PE=1<br>SV=1 -<br>[LRC47_MOUSE]  | 30.46 | 4 | 14 | 14 | 29  | 0.96 | 1.01 | 1.06 | 0.95 | 1.04 | 1.15 | 1.23 | 1.16 | 1.21 | 1.16 | 1.26 | 1.12 | 1.22 | 63.55  | 8.10 |
| G3UZ60 | Small ubiquitin-related<br>modifier 3 OS=Mus<br>musculus GN=Sumo3<br>PE=2 SV=1 -<br>[G3UZ60_MOUSE]            | 28.00 | 7 | 1  | 2  | 19  | 1.11 | 0.74 | 0.66 | 0.94 | 0.85 | 1.23 | 1.11 | 1.16 | 1.05 | 1.02 | 0.93 | 1.00 | 0.90 | 8.60   | 9.20 |
| B1ARW8 | Uncharacterized<br>protein C1orf122<br>homolog OS=Mus<br>musculus PE=2 SV=1 -<br>[CA122_MOUSE]                | 34.55 | 2 | 3  | 3  | 7   | 1.21 | 0.91 | 0.84 | 0.92 | 0.82 | 1.34 | 1.10 | 1.16 | 0.95 | 1.09 | 0.89 | 1.12 | 0.95 | 11.31  | 8.21 |



|        |                                                                                                            |       |   |    |    |     |      |      |      |      |      |      |      |      |      |      |      |      |      |        |       |
|--------|------------------------------------------------------------------------------------------------------------|-------|---|----|----|-----|------|------|------|------|------|------|------|------|------|------|------|------|------|--------|-------|
| Q3UL36 | Arginine and glutamate rich protein 1 OS=Mus musculus GN=Arglu1 PE=1 SV=2 - [ARGL1_MOUSE]                  | 14.76 | 3 | 5  | 6  | 19  | 0.95 | 0.88 | 0.95 | 0.98 | 1.05 | 1.09 | 1.11 | 1.16 | 1.25 | 1.12 | 1.17 | 0.96 | 0.98 | 32.87  | 10.36 |
| Q9D0R8 | Protein LSM12 homolog OS=Mus musculus GN=Lsm12 PE=1 SV=1 - [LSM12_MOUSE]                                   | 26.15 | 1 | 3  | 3  | 9   | 0.85 | 0.70 | 0.82 | 0.79 | 0.93 | 1.01 | 1.18 | 1.16 | 1.25 | 0.92 | 1.05 | 0.98 | 1.13 | 21.69  | 7.74  |
| Q8BWS5 | G protein-regulated inducer of neurite outgrowth 3 OS=Mus musculus GN=Gprin3 PE=1 SV=1 - [GRIN3_MOUSE]     | 42.46 | 1 | 22 | 22 | 80  | 1.05 | 0.97 | 0.94 | 1.00 | 0.96 | 1.24 | 1.21 | 1.16 | 1.12 | 1.30 | 1.20 | 1.30 | 1.24 | 80.44  | 7.02  |
| P29699 | Alpha-2-HS-glycoprotein OS=Mus musculus GN=Ahsbg PE=1 SV=1 - [FETUA_MOUSE]                                 | 7.25  | 1 | 2  | 2  | 2   | 0.96 | 0.78 | 0.81 | 0.58 | 0.60 | 1.45 | 1.50 | 1.16 | 1.20 | 1.14 | 1.18 | 0.57 | 0.60 | 37.30  | 6.51  |
| J3QPM9 | Guanine nucleotide-binding protein subunit gamma OS=Mus musculus GN=Gm3150 PE=3 SV=1 - [J3QPM9_MOUSE]      | 13.24 | 2 | 1  | 1  | 7   | 1.06 | 0.95 | 0.89 | 1.04 | 0.97 | 1.24 | 1.24 | 1.16 | 1.12 | 1.22 | 1.19 | 1.09 | 1.08 | 7.29   | 9.50  |
| Q3V1V3 | ESF1 homolog OS=Mus musculus GN=Esf1 PE=1 SV=1 - [ESF1_MOUSE]                                              | 3.91  | 1 | 3  | 3  | 6   | 1.05 | 0.93 | 0.85 | 1.03 | 0.87 | 1.22 | 1.00 | 1.16 | 1.11 | 1.03 | 0.98 | 1.21 | 1.06 | 97.99  | 5.05  |
| P06728 | Apolipoprotein A-IV OS=Mus musculus GN=Apoa4 PE=2 SV=3 - [APOA4_MOUSE]                                     | 17.97 | 1 | 7  | 7  | 13  | 1.01 | 1.28 | 1.25 | 0.92 | 0.93 | 1.19 | 1.19 | 1.16 | 1.23 | 2.81 | 2.92 | 1.39 | 1.42 | 45.00  | 5.47  |
| Q9DCC5 | Cbx3 protein OS=Mus musculus GN=Cbx3 PE=2 SV=1 - [Q9DCC5_MOUSE]                                            | 64.48 | 4 | 9  | 11 | 95  | 1.02 | 0.78 | 0.70 | 0.90 | 0.86 | 1.19 | 1.14 | 1.16 | 1.07 | 0.96 | 0.95 | 0.97 | 0.90 | 20.80  | 5.33  |
| Q9DAF3 | Protein DDH1 homolog 1 OS=Mus musculus GN=Ddi1 PE=1 SV=1 - [DDH1_MOUSE]                                    | 3.43  | 1 | 1  | 1  | 5   | 0.84 | 0.76 | 0.85 | 0.71 | 0.84 | 1.01 | 1.25 | 1.16 | 1.36 | 0.87 | 1.11 | 0.91 | 1.09 | 45.68  | 6.18  |
| Q91VJ5 | Polyglutamine-binding protein 1 OS=Mus musculus GN=Pqbp1 PE=2 SV=1 - [PQBP1_MOUSE]                         | 40.30 | 3 | 8  | 8  | 41  | 1.08 | 1.15 | 0.97 | 0.95 | 0.90 | 1.18 | 1.02 | 1.16 | 1.09 | 1.12 | 0.98 | 1.04 | 0.94 | 30.58  | 6.23  |
| Q8CJ19 | Protein-methionine sulfoxide oxidase MICAL3 OS=Mus musculus GN=Mical3 PE=1 SV=2 - [MICA3_MOUSE]            | 24.84 | 7 | 37 | 38 | 112 | 1.01 | 1.04 | 1.04 | 1.02 | 1.04 | 1.15 | 1.17 | 1.16 | 1.17 | 1.10 | 1.09 | 1.07 | 1.07 | 223.58 | 5.47  |
| Q91VW3 | SH3 domain-binding glutamic acid-rich-like protein 3 OS=Mus musculus GN=Sh3bgrl3 PE=1 SV=1 - [SH3L3_MOUSE] | 87.10 | 1 | 9  | 10 | 194 | 0.99 | 0.98 | 0.92 | 0.92 | 0.90 | 1.09 | 1.05 | 1.16 | 1.12 | 1.08 | 1.03 | 1.01 | 1.04 | 10.47  | 5.14  |

|         |                                                                                                                    |       |    |    |    |     |      |      |      |      |      |      |      |      |      |      |      |      |      |         |      |
|---------|--------------------------------------------------------------------------------------------------------------------|-------|----|----|----|-----|------|------|------|------|------|------|------|------|------|------|------|------|------|---------|------|
| Q62347  | Cyclic AMP-responsive element-binding protein 1 OS=Mus musculus GN=Creb1 PE=2 SV=1 - [Q62347_MOUSE]                | 20.56 | 22 | 4  | 4  | 19  | 1.04 | 0.97 | 0.93 | 0.98 | 0.94 | 1.26 | 1.21 | 1.16 | 1.13 | 1.07 | 0.98 | 1.00 | 0.94 | 30.94   | 6.37 |
| P63271  | Transcription elongation factor SPT4-A OS=Mus musculus GN=Supt4h1a PE=2 SV=1 - [SPT4A_MOUSE]                       | 21.37 | 4  | 2  | 2  | 2   | 0.85 | 0.70 | 0.82 | 0.97 | 1.14 | 1.02 | 1.20 | 1.16 | 1.37 | 1.06 | 1.25 | 0.99 | 1.17 | 13.18   | 8.06 |
| Q7TNF8- | Isoform 2 of Peripheral-type benzodiazepine receptor-associated protein 1 OS=Mus musculus GN=Bzap1 - [RIMB1_MOUSE] | 0.70  | 4  | 1  | 1  | 1   | 1.03 | 0.66 | 0.64 | 0.92 | 0.90 | 1.21 | 1.17 | 1.16 | 1.13 | 1.00 | 0.98 | 0.83 | 0.81 | 169.80  | 5.34 |
| F8VQ95  | Transforming acidic coiled-coil-containing protein 1 OS=Mus musculus GN=Tacc1 PE=2 SV=1 - [F8VQ95_MOUSE]           | 50.39 | 3  | 23 | 26 | 68  | 1.05 | 0.99 | 0.98 | 0.95 | 0.89 | 1.12 | 1.08 | 1.16 | 1.14 | 1.05 | 1.02 | 1.02 | 1.03 | 84.20   | 5.03 |
| Q61792  | LIM and SH3 domain protein 1 OS=Mus musculus GN=Lasp1 PE=1 SV=1 - [LASP1_MOUSE]                                    | 69.96 | 11 | 16 | 18 | 247 | 1.04 | 0.95 | 0.92 | 0.93 | 0.90 | 1.16 | 1.11 | 1.16 | 1.14 | 1.07 | 1.05 | 1.03 | 0.98 | 29.98   | 7.05 |
| E0CXD4  | Protein Pcdh1 OS=Mus musculus GN=Pcdh1 PE=2 SV=1 - [E0CXD4_MOUSE]                                                  | 50.83 | 1  | 4  | 10 | 65  | 1.07 | 0.94 | 0.92 | 0.89 | 0.81 | 1.12 | 1.09 | 1.16 | 1.12 | 1.10 | 1.08 | 1.10 | 1.05 | 39.07   | 4.59 |
| Q99LB4  | Capping protein (Actin filament), gelsolin-like OS=Mus musculus GN=Capg PE=1 SV=1 - [Q99LB4_MOUSE]                 | 4.01  | 2  | 1  | 1  | 2   | 1.01 | 1.06 | 1.04 | 1.15 | 1.14 | 1.49 | 1.47 | 1.16 | 1.14 | 1.21 | 1.19 | 1.13 | 1.11 | 38.74   | 6.95 |
| O35691  | Pinin OS=Mus musculus GN=Pnn PE=1 SV=4 - [PININ_MOUSE]                                                             | 18.62 | 2  | 12 | 12 | 44  | 1.03 | 0.98 | 0.96 | 0.95 | 0.94 | 1.11 | 1.09 | 1.16 | 1.19 | 1.06 | 1.09 | 1.02 | 1.03 | 82.39   | 7.01 |
| A2AGL3- | Isoform 2 of Ryanodine receptor 3 OS=Mus musculus GN=Ryr3 - [RZR3_MOUSE]                                           | 1.03  | 3  | 1  | 3  | 3   | 1.03 | 0.85 | 0.82 | 0.95 | 0.92 | 1.12 | 1.08 | 1.16 | 1.12 | 1.09 | 1.06 | 1.07 | 1.04 | 547.40  | 5.74 |
| Q3URU2  | Paternally-expressed gene 3 protein OS=Mus musculus GN=Peg3 PE=1 SV=1 - [PEG3_MOUSE]                               | 4.33  | 2  | 5  | 5  | 11  | 1.17 | 1.05 | 0.99 | 1.09 | 0.95 | 1.19 | 0.98 | 1.16 | 1.16 | 1.18 | 1.13 | 1.10 | 1.08 | 178.82  | 5.45 |
| A2ASS6  | Titin OS=Mus musculus GN=Ttn PE=1 SV=1 - [TTIN_MOUSE]                                                              | 0.14  | 7  | 1  | 5  | 29  | 1.35 | 1.12 | 0.83 | 0.73 | 0.54 | 9.36 | 6.91 | 1.16 | 0.86 | 1.28 | 0.95 | 1.20 | 0.89 | 3904.05 | 6.20 |
| Q9EP71  | Ankycorbin OS=Mus musculus GN=Rai14 PE=1 SV=1 - [RAI14_MOUSE]                                                      | 16.45 | 1  | 13 | 14 | 25  | 0.98 | 0.90 | 0.86 | 0.89 | 0.89 | 1.13 | 1.13 | 1.16 | 1.16 | 1.05 | 1.08 | 0.96 | 0.93 | 108.79  | 6.27 |

|         |                                                                                                      |       |    |    |    |     |      |      |      |      |      |      |      |      |      |      |      |      |      |        |      |
|---------|------------------------------------------------------------------------------------------------------|-------|----|----|----|-----|------|------|------|------|------|------|------|------|------|------|------|------|------|--------|------|
| Q9QXT0  | Protein canopy homolog 2 OS=Mus musculus GN=Capy2 PE=2 SV=1 - [CNPY2_MOUSE]                          | 51.65 | 1  | 8  | 8  | 80  | 1.08 | 1.05 | 1.03 | 0.94 | 0.89 | 1.15 | 1.08 | 1.16 | 1.10 | 1.13 | 1.08 | 1.03 | 1.05 | 20.75  | 5.07 |
| Q8BQ46  | Protein Taf15 OS=Mus musculus GN=Taf15 PE=2 SV=1 - [Q8BQ46_MOUSE]                                    | 21.90 | 2  | 7  | 10 | 47  | 1.14 | 0.86 | 0.75 | 0.96 | 0.89 | 1.22 | 1.12 | 1.16 | 1.02 | 1.01 | 0.95 | 0.96 | 0.96 | 58.57  | 8.40 |
| Q71FD7  | Filamin-binding LIM protein 1 OS=Mus musculus GN=Fblim1 PE=1 SV=2 - [FBLI1_MOUSE]                    | 11.47 | 9  | 3  | 3  | 6   | 0.90 | 1.26 | 1.31 | 1.00 | 1.18 | 1.02 | 1.05 | 1.16 | 1.29 | 1.12 | 1.51 | 1.10 | 1.21 | 41.00  | 6.51 |
| Q9DCH6  | AN1-type zinc finger protein 6 OS=Mus musculus GN=Zfand6 PE=1 SV=1 - [ZFAN6_MOUSE]                   | 9.87  | 1  | 1  | 2  | 5   | 1.05 | 1.36 | 1.20 | 0.94 | 0.86 | 1.29 | 1.22 | 1.16 | 1.17 | 1.05 | 1.18 | 0.99 | 0.94 | 23.99  | 6.51 |
| A2AV17  | Ribosome-binding protein 1 OS=Mus musculus GN=Rrbp1 PE=2 SV=1 - [A2AV17_MOUSE]                       | 32.17 | 13 | 41 | 41 | 114 | 1.04 | 0.87 | 0.84 | 0.96 | 0.92 | 1.19 | 1.14 | 1.16 | 1.10 | 1.14 | 1.11 | 0.97 | 0.94 | 158.30 | 9.19 |
| Q4V9W2  | Protein SREK1IP1 OS=Mus musculus GN=Srek1ip1 PE=2 SV=1 - [SR1IP_MOUSE]                               | 4.58  | 1  | 1  | 1  | 1   | 0.96 | 1.03 | 1.07 | 0.84 | 0.87 | 1.02 | 1.06 | 1.16 | 1.21 | 1.07 | 1.12 | 1.11 | 1.16 | 18.14  | 9.91 |
| P60904  | DnaJ homolog subfamily C member 5 OS=Mus musculus GN=Dnajc5 PE=1 SV=1 - [DNJCS_MOUSE]                | 58.08 | 3  | 6  | 6  | 55  | 1.19 | 0.98 | 0.83 | 1.03 | 0.92 | 1.24 | 1.05 | 1.16 | 0.99 | 1.11 | 0.93 | 1.12 | 1.03 | 22.09  | 5.07 |
| Q5SNZ0- | Isoform 2 of Girdin OS=Mus musculus GN=Ccdc88a - [GRDN_MOUSE]                                        | 14.04 | 4  | 21 | 21 | 37  | 0.97 | 1.00 | 1.11 | 0.97 | 1.04 | 1.15 | 1.17 | 1.16 | 1.20 | 1.00 | 1.05 | 0.98 | 1.05 | 212.37 | 5.99 |
| Q62376  | U1 small nuclear ribonucleoprotein 70 kDa OS=Mus musculus GN=Snmp70 PE=1 SV=2 - [RU17_MOUSE]         | 16.74 | 2  | 6  | 6  | 27  | 1.11 | 0.92 | 0.85 | 1.05 | 0.96 | 1.19 | 1.04 | 1.16 | 1.02 | 1.09 | 1.03 | 0.94 | 0.88 | 51.96  | 9.94 |
| Q8BYY0  | Protein Rsl1d1 OS=Mus musculus GN=Rsl1d1 PE=2 SV=1 - [Q8BYY0_MOUSE]                                  | 3.98  | 1  | 1  | 1  | 3   | 1.11 | 1.11 | 1.00 | 1.10 | 0.99 | 1.10 | 0.99 | 1.16 | 1.05 | 1.23 | 1.11 | 1.09 | 0.99 | 50.39  | 9.98 |
| Q8K070  | Sterile alpha motif domain-containing protein 14 OS=Mus musculus GN=Samd14 PE=1 SV=1 - [SAM14_MOUSE] | 26.62 | 2  | 7  | 7  | 16  | 1.31 | 0.87 | 0.83 | 0.91 | 0.77 | 1.22 | 0.95 | 1.16 | 0.93 | 1.27 | 1.04 | 1.25 | 1.03 | 45.07  | 9.47 |
| Q8BQ47  | Protein canopy homolog 4 OS=Mus musculus GN=Capy4 PE=1 SV=1 - [CNPY4_MOUSE]                          | 32.24 | 2  | 6  | 6  | 24  | 1.06 | 0.92 | 0.87 | 0.95 | 0.86 | 1.13 | 1.04 | 1.16 | 1.03 | 1.08 | 0.91 | 0.97 | 0.90 | 28.08  | 4.77 |

|        |                                                                                                                                                                   |       |   |    |    |      |      |      |      |      |      |      |      |      |      |      |      |      |      |        |      |
|--------|-------------------------------------------------------------------------------------------------------------------------------------------------------------------|-------|---|----|----|------|------|------|------|------|------|------|------|------|------|------|------|------|------|--------|------|
| Q04692 | SWI/SNF-related matrix-associated actin-dependent regulator of chromatin subfamily A containing DEAD/H box 1 OS=Mus musculus GN=Smarcd1 PE=1 SV=2 - [SMRCD_MOUSE] | 0.98  | 1 | 1  | 1  | 2    | 1.20 | 1.06 | 0.89 | 1.07 | 0.89 | 1.17 | 0.97 | 1.17 | 0.97 | 1.16 | 0.97 | 1.28 | 1.07 | 116.38 | 5.68 |
| Q9D1H6 | NADH dehydrogenase [ubiquinone] 1 alpha subcomplex assembly factor 4 OS=Mus musculus GN=Ndufa4 PE=2 SV=1 - [NDUF4_MOUSE]                                          | 27.75 | 2 | 5  | 5  | 10   | 1.00 | 0.75 | 0.78 | 0.90 | 0.94 | 1.16 | 1.16 | 1.17 | 1.13 | 0.98 | 1.02 | 1.03 | 1.02 | 20.07  | 9.39 |
| Q9CWX3 | Isoform 2 of RNA-binding protein 8A OS=Mus musculus GN=Rbm8a - [RBM8A_MOUSE]                                                                                      | 45.09 | 2 | 7  | 7  | 94   | 1.04 | 0.99 | 0.95 | 1.07 | 1.05 | 1.14 | 1.10 | 1.17 | 1.05 | 1.15 | 1.07 | 1.08 | 1.03 | 19.75  | 5.92 |
| Q8CAF4 | Isoform 3 of NHS-like protein 1 OS=Mus musculus GN=Nhs1 - [NHSL1_MOUSE]                                                                                           | 6.06  | 3 | 5  | 5  | 11   | 0.98 | 1.07 | 1.13 | 0.91 | 0.97 | 1.11 | 1.14 | 1.17 | 1.19 | 1.20 | 1.16 | 0.97 | 1.05 | 169.35 | 8.07 |
| Q8CFN5 | Isoform 3 of Myocyte-specific enhancer factor 2C OS=Mus musculus GN=Mef2c - [MEF2C_MOUSE]                                                                         | 12.90 | 6 | 3  | 4  | 8    | 0.89 | 1.14 | 1.22 | 0.94 | 1.01 | 1.22 | 1.35 | 1.17 | 1.32 | 1.09 | 1.17 | 0.81 | 0.97 | 47.93  | 7.84 |
| F8WHG2 | DNA-binding protein SATB1 OS=Mus musculus GN=Sath1 PE=2 SV=1 - [F8WHG2_MOUSE]                                                                                     | 6.32  | 5 | 2  | 3  | 6    | 0.72 | 0.89 | 1.24 | 0.98 | 1.19 | 0.97 | 1.41 | 1.17 | 1.74 | 0.94 | 1.00 | 0.86 | 1.04 | 85.31  | 6.54 |
| Q7TNE3 | Sperm-associated antigen 7 OS=Mus musculus GN=Spag7 PE=1 SV=1 - [SPAG7_MOUSE]                                                                                     | 25.99 | 2 | 6  | 6  | 14   | 1.04 | 0.99 | 0.97 | 0.95 | 0.93 | 1.24 | 1.12 | 1.17 | 1.06 | 1.20 | 1.07 | 1.00 | 0.89 | 25.91  | 7.43 |
| P18760 | Cofilin-1 OS=Mus musculus GN=Cfl1 PE=1 SV=3 - [COF1_MOUSE]                                                                                                        | 80.72 | 1 | 1  | 22 | 1007 | 1.00 | 0.78 | 0.78 | 0.89 | 0.90 | 1.15 | 1.14 | 1.17 | 1.16 | 1.01 | 1.00 | 1.01 | 1.03 | 18.55  | 8.09 |
| Q4V9Z5 | Isoform 3 of Seizure 6-like protein 2 OS=Mus musculus GN=Sez6l2 - [SE6L2_MOUSE]                                                                                   | 21.32 | 2 | 1  | 13 | 47   | 0.91 | 1.14 | 1.25 | 0.98 | 1.07 | 1.17 | 1.28 | 1.17 | 1.28 | 1.08 | 1.19 | 0.92 | 1.01 | 93.31  | 4.84 |
| P97452 | Ribosome biogenesis protein BOP1 OS=Mus musculus GN=Bop1 PE=1 SV=1 - [BOP1_MOUSE]                                                                                 | 3.83  | 1 | 2  | 2  | 4    | 1.07 | 1.07 | 1.00 | 1.03 | 0.97 | 0.92 | 0.86 | 1.17 | 1.09 | 1.02 | 0.95 | 1.07 | 1.01 | 82.49  | 6.28 |
| P19973 | Lymphocyte-specific protein 1 OS=Mus musculus GN=Lsp1 PE=1 SV=2 - [LSP1_MOUSE]                                                                                    | 54.24 | 4 | 10 | 10 | 25   | 0.96 | 1.05 | 1.03 | 0.90 | 0.90 | 1.20 | 1.18 | 1.17 | 1.20 | 1.21 | 1.25 | 1.14 | 1.10 | 36.69  | 4.82 |

|        |                                                                                                                           |       |   |    |    |     |      |      |      |      |      |      |      |      |      |      |      |      |      |        |      |
|--------|---------------------------------------------------------------------------------------------------------------------------|-------|---|----|----|-----|------|------|------|------|------|------|------|------|------|------|------|------|------|--------|------|
| Q9D1L9 | Regulator complex protein LAMTOR5<br>OS=Mus musculus<br>GN=Lamtor5 PE=2<br>SV=1 - [LTOR5_MOUSE]                           | 81.32 | 2 | 4  | 4  | 21  | 1.15 | 0.95 | 0.82 | 1.03 | 0.90 | 1.17 | 1.06 | 1.17 | 1.10 | 1.11 | 1.01 | 1.07 | 0.93 | 9.64   | 4.87 |
| Q8BGD9 | Eukaryotic translation initiation factor 4B<br>OS=Mus musculus<br>GN=Eif4b PE=1 SV=1 - [IF4B_MOUSE]                       | 46.64 | 1 | 29 | 29 | 229 | 1.05 | 0.91 | 0.91 | 0.97 | 0.91 | 1.20 | 1.12 | 1.17 | 1.11 | 1.09 | 1.03 | 1.01 | 0.98 | 68.80  | 5.67 |
| Q3U319 | E3 ubiquitin-protein ligase BRE1B<br>OS=Mus musculus<br>GN=Rnf40 PE=2<br>SV=2 - [BRE1B_MOUSE]                             | 13.99 | 1 | 9  | 9  | 16  | 0.91 | 0.96 | 1.06 | 0.82 | 0.90 | 1.11 | 1.19 | 1.17 | 1.21 | 0.92 | 0.97 | 0.95 | 1.05 | 113.90 | 6.48 |
| E9PWW9 | Protein Rsf1<br>OS=Mus musculus<br>GN=Rsf1 PE=2 SV=1 - [E9PWW9_MOUSE]                                                     | 13.60 | 2 | 13 | 13 | 29  | 1.12 | 1.02 | 0.85 | 1.01 | 0.91 | 1.13 | 0.99 | 1.17 | 1.04 | 1.04 | 0.98 | 1.01 | 0.92 | 160.53 | 5.02 |
| Q8BL06 | Inactive ubiquitin carboxyl-terminal hydrolase 54<br>OS=Mus musculus<br>GN=Usp54 PE=1 SV=2 - [UBP54_MOUSE]                | 1.13  | 1 | 1  | 2  | 3   | 1.02 | 1.32 | 1.29 | 1.14 | 1.12 | 1.19 | 1.17 | 1.17 | 1.14 | 1.15 | 1.13 | 1.20 | 1.19 | 176.55 | 7.62 |
| Q9CZB6 | Mediator of RNA polymerase II transcription subunit 7<br>OS=Mus musculus<br>GN=Med7 PE=2 SV=2 - [MED7_MOUSE]              | 15.02 | 6 | 2  | 2  | 4   | 0.90 | 0.89 | 0.99 | 1.01 | 1.13 | 1.05 | 1.17 | 1.17 | 1.30 | 0.83 | 0.93 | 0.98 | 1.10 | 27.19  | 5.66 |
| Q8BKX1 | Isoform 4 of Brain-specific angiogenesis inhibitor 1-associated protein 2<br>OS=Mus musculus<br>GN=Baiap2 - [BAIP2_MOUSE] | 66.18 | 1 | 1  | 25 | 131 | 0.79 | 0.68 | 0.86 | 0.95 | 1.20 | 1.02 | 1.28 | 1.17 | 1.46 | 1.03 | 1.30 | 0.89 | 1.12 | 53.24  | 8.98 |
| Q99LP6 | GrpE protein homolog 1, mitochondrial<br>OS=Mus musculus<br>GN=Grpel1 PE=1<br>SV=1 - [GRPE1_MOUSE]                        | 53.46 | 1 | 10 | 10 | 59  | 0.94 | 0.79 | 0.80 | 0.82 | 0.88 | 1.10 | 1.17 | 1.17 | 1.18 | 0.97 | 0.98 | 0.92 | 0.99 | 24.29  | 8.38 |
| Q9JLB9 | Poliovirus receptor-related protein 3<br>OS=Mus musculus<br>GN=Pvr13 PE=1 SV=1 - [PVRL3_MOUSE]                            | 14.03 | 4 | 5  | 5  | 13  | 1.16 | 1.07 | 0.92 | 1.02 | 0.90 | 1.17 | 1.03 | 1.17 | 1.08 | 1.07 | 0.95 | 1.02 | 0.95 | 60.54  | 6.54 |
| Q8BR92 | Paralemmin-2<br>OS=Mus musculus<br>GN=Palm2 PE=1<br>SV=1 - [PALM2_MOUSE]                                                  | 60.37 | 2 | 12 | 19 | 90  | 0.99 | 0.88 | 0.87 | 0.94 | 0.95 | 1.17 | 1.13 | 1.17 | 1.14 | 1.09 | 1.10 | 0.96 | 0.98 | 42.07  | 5.15 |
| Q7TN31 | Angiogenic factor with G patch and FHA domains 1<br>OS=Mus musculus<br>GN=Aggf1 PE=2 SV=1 - [AGGF1_MOUSE]                 | 1.41  | 1 | 1  | 1  | 4   | 1.12 | 1.14 | 1.01 | 1.03 | 0.92 | 1.18 | 1.05 | 1.17 | 1.04 | 1.05 | 0.94 | 1.32 | 1.19 | 79.40  | 5.22 |

|        |                                                                                                                   |       |   |    |    |     |      |      |      |      |      |      |      |      |      |      |      |      |      |        |      |
|--------|-------------------------------------------------------------------------------------------------------------------|-------|---|----|----|-----|------|------|------|------|------|------|------|------|------|------|------|------|------|--------|------|
| Q9Z1S8 | GRB2-associated-binding protein 2<br>OS=Mus musculus<br>GN=Cab2 PE=1 SV=2<br>-[GAB2_MOUSE]                        | 9.32  | 2 | 4  | 4  | 8   | 0.99 | 0.89 | 0.91 | 0.90 | 0.88 | 1.14 | 1.16 | 1.17 | 1.16 | 1.07 | 1.12 | 1.20 | 1.09 | 73.16  | 8.31 |
| Q8CH02 | SURP and G-patch domain-containing protein 1 OS=Mus musculus GN=Supg1 PE=1 SV=1<br>-[SUGP1_MOUSE]                 | 36.86 | 1 | 18 | 18 | 45  | 1.00 | 0.92 | 0.93 | 0.96 | 0.94 | 1.24 | 1.21 | 1.17 | 1.13 | 1.08 | 1.02 | 0.99 | 0.92 | 72.60  | 7.64 |
| Q8C9S4 | Uncharacterized protein C10orf118 homolog OS=Mus musculus GN=Otg1 PE=2 SV=2<br>-[CJ118_MOUSE]                     | 10.14 | 3 | 6  | 7  | 13  | 0.98 | 0.94 | 1.15 | 0.89 | 0.99 | 1.07 | 1.17 | 1.17 | 1.26 | 1.00 | 1.03 | 1.06 | 1.08 | 104.84 | 5.53 |
| Q80YR5 | Scaffold attachment factor B2 OS=Mus musculus GN=Safb2 PE=1 SV=2<br>-[SAFB2_MOUSE]                                | 23.01 | 7 | 10 | 18 | 56  | 1.02 | 0.94 | 0.81 | 0.99 | 0.96 | 1.14 | 1.14 | 1.17 | 1.10 | 1.14 | 1.10 | 1.14 | 1.04 | 111.77 | 6.38 |
| Q794H2 | Nucleosome assembly protein 1-like 3 OS=Mus musculus GN=Nap113 PE=2 SV=1<br>-[NP1L3_MOUSE]                        | 1.47  | 1 | 1  | 1  | 2   | 0.94 | 0.78 | 0.83 | 0.89 | 0.95 | 1.14 | 1.21 | 1.17 | 1.24 | 1.11 | 1.18 | 0.96 | 1.03 | 61.34  | 4.79 |
| Q8WTY4 | Anamorsin OS=Mus musculus GN=Cipin1 PE=1 SV=1<br>-[CPIN1_MOUSE]                                                   | 44.98 | 4 | 8  | 8  | 58  | 0.95 | 0.78 | 0.80 | 0.83 | 0.91 | 1.12 | 1.16 | 1.17 | 1.23 | 1.08 | 1.11 | 1.04 | 1.05 | 33.41  | 5.20 |
| Q3UR78 | Neuropeptide-like protein C4orf48 homolog OS=Mus musculus GN=Gm1673 PE=2 SV=2<br>-[CD048_MOUSE]                   | 11.11 | 2 | 1  | 1  | 2   | 1.01 | 1.28 | 1.26 | 0.97 | 0.96 | 0.98 | 0.97 | 1.17 | 1.15 | 0.96 | 0.95 | 1.11 | 1.10 | 9.80   | 8.94 |
| D3Z7G5 | AN1-type zinc finger protein 1 OS=Mus musculus GN=Zfand1 PE=2 SV=1<br>-[D3Z7G5_MOUSE]                             | 5.80  | 3 | 1  | 1  | 2   | 1.03 | 1.11 | 1.08 | 1.00 | 0.97 | 1.13 | 1.09 | 1.17 | 1.13 | 1.12 | 1.09 | 1.30 | 1.27 | 22.70  | 8.87 |
| E9PU15 | Formin-binding protein 1-like OS=Mus musculus GN=Fbnp11 PE=2 SV=1<br>-[E9PU15_MOUSE]                              | 30.54 | 4 | 15 | 15 | 69  | 0.95 | 0.93 | 1.02 | 0.92 | 0.97 | 1.15 | 1.18 | 1.17 | 1.32 | 1.08 | 1.21 | 1.08 | 1.15 | 70.42  | 6.73 |
| P23780 | Beta-galactosidase OS=Mus musculus GN=Gib1 PE=2 SV=1<br>-[BGAL_MOUSE]                                             | 9.12  | 2 | 5  | 5  | 9   | 1.02 | 0.84 | 0.82 | 1.06 | 1.02 | 1.15 | 1.24 | 1.17 | 1.21 | 1.11 | 1.06 | 1.12 | 1.09 | 73.07  | 7.47 |
| A2AEW8 | GRIP1-associated protein 1 OS=Mus musculus GN=Gripap1 PE=2 SV=1<br>-[A2AEW8_MOUSE]                                | 68.58 | 4 | 2  | 51 | 319 | 1.01 | 1.10 | 1.22 | 0.97 | 0.82 | 1.35 | 1.21 | 1.17 | 1.28 | 1.13 | 1.03 | 1.04 | 1.16 | 95.85  | 5.17 |
| Q9CR61 | NADH dehydrogenase [ubiquinone] 1 beta subcomplex subunit 7 OS=Mus musculus GN=Ndufb7 PE=1 SV=3<br>-[NDUB7_MOUSE] | 59.12 | 1 | 7  | 7  | 39  | 0.93 | 0.96 | 0.98 | 0.95 | 1.14 | 1.11 | 1.31 | 1.17 | 1.20 | 1.09 | 1.19 | 0.97 | 1.07 | 16.32  | 8.18 |

|          |                                                                                                                 |       |   |    |    |     |      |      |      |      |      |      |      |      |      |      |      |      |      |        |      |
|----------|-----------------------------------------------------------------------------------------------------------------|-------|---|----|----|-----|------|------|------|------|------|------|------|------|------|------|------|------|------|--------|------|
| A8Y5G5   | Protein Zfyve9<br>OS=Mus musculus<br>GN=Zfyve9 PE=2<br>SV=1 -<br>[A8Y5G5_MOUSE]                                 | 9.19  | 2 | 7  | 7  | 23  | 0.88 | 1.20 | 1.20 | 0.95 | 1.00 | 1.12 | 1.28 | 1.17 | 1.27 | 1.01 | 1.10 | 1.01 | 1.17 | 146.24 | 5.01 |
| F6T9H9   | Myotubularin-related<br>protein 1 (Fragment)<br>OS=Mus musculus<br>GN=Mtmr1 PE=4<br>SV=1 -<br>[F6T9H9_MOUSE]    | 22.26 | 5 | 1  | 5  | 11  | 0.99 | 1.31 | 1.31 | 1.11 | 1.12 | 0.90 | 0.90 | 1.17 | 1.17 | 1.40 | 1.41 | 0.94 | 0.95 | 33.91  | 6.44 |
| Q61645   | Protein hairless<br>OS=Mus musculus<br>GN=Hr PE=2 SV=2 -<br>[HAIR_MOUSE]                                        | 0.76  | 1 | 1  | 1  | 1   | 1.25 | 0.93 | 0.75 | 1.12 | 0.90 | 1.19 | 0.95 | 1.17 | 0.93 | 1.13 | 0.91 | 1.20 | 0.96 | 127.11 | 7.39 |
| Q9Z2B9   | Ribosomal protein S6<br>kinase alpha-4<br>OS=Mus musculus<br>GN=Rps6ka4 PE=1<br>SV=2 -<br>[KS6A4_MOUSE]         | 1.68  | 1 | 1  | 1  | 2   | 1.03 | 1.24 | 1.20 | 1.09 | 1.05 | 1.04 | 1.00 | 1.17 | 1.13 | 1.09 | 1.06 | 1.21 | 1.18 | 85.60  | 8.27 |
| P63158   | High mobility group<br>protein B1 OS=Mus<br>musculus GN=Hmgb1<br>PE=1 SV=2 -<br>[HMGB1_MOUSE]                   | 65.58 | 2 | 9  | 16 | 262 | 0.97 | 0.70 | 0.64 | 1.01 | 1.02 | 1.14 | 1.12 | 1.17 | 1.20 | 1.11 | 1.09 | 0.96 | 0.96 | 24.88  | 5.74 |
| O89032-3 | Isoform 3 of SH3 and<br>PX domain-containing<br>protein 2A OS=Mus<br>musculus<br>GN=Sh3pxd2a -<br>[SPD2A_MOUSE] | 10.45 | 3 | 7  | 7  | 9   | 1.14 | 1.00 | 0.83 | 1.01 | 0.89 | 1.10 | 1.00 | 1.17 | 1.01 | 1.08 | 0.98 | 1.09 | 0.93 | 118.96 | 8.18 |
| A2AJH3   | Glycylpeptide N-<br>tetradecanoyltransferas<br>e 2 OS=Mus musculus<br>GN=Nmt2 PE=2 SV=1<br>- [A2AJH3_MOUSE]     | 19.08 | 3 | 6  | 8  | 20  | 1.02 | 0.89 | 0.85 | 0.93 | 0.99 | 1.00 | 1.06 | 1.17 | 1.14 | 1.06 | 1.05 | 0.94 | 0.92 | 56.95  | 8.16 |
| Q60605-2 | Isoform Smooth muscle<br>of Myosin light<br>polypeptide 6 OS=Mus<br>musculus GN=Myl6 -<br>[MYL6_MOUSE]          | 76.16 | 1 | 1  | 10 | 375 | 1.02 | 0.96 | 0.96 | 0.96 | 0.97 | 1.11 | 1.11 | 1.17 | 1.13 | 1.13 | 1.13 | 1.08 | 1.04 | 16.95  | 4.55 |
| Q6RU7    | Protein CCSMT1<br>OS=Mus musculus<br>GN=Ccsmst1 PE=3<br>SV=1 -<br>[CSMT1_MOUSE]                                 | 18.38 | 1 | 1  | 1  | 1   | 0.92 | 1.05 | 1.14 | 0.95 | 1.03 | 1.46 | 1.58 | 1.17 | 1.27 | 1.33 | 1.44 | 1.26 | 1.37 | 15.34  | 4.93 |
| F6XQW1   | Cohesin subunit SA-1<br>(Fragment) OS=Mus<br>musculus GN=Stag1<br>PE=4 SV=1 -<br>[F6XQW1_MOUSE]                 | 2.88  | 5 | 1  | 2  | 3   | 0.83 | 1.31 | 1.58 | 0.92 | 1.12 | 1.13 | 1.36 | 1.17 | 1.41 | 0.91 | 1.11 | 0.83 | 1.00 | 99.93  | 5.26 |
| Q8R2R3   | Alpha- and gamma-<br>adaptin-binding protein<br>p34 OS=Mus musculus<br>GN=Aagab PE=2<br>SV=2 -<br>[AAGAB_MOUSE] | 4.75  | 1 | 1  | 1  | 2   | 1.03 | 1.29 | 1.25 | 1.02 | 0.99 | 0.90 | 0.88 | 1.17 | 1.14 | 1.12 | 1.09 | 1.43 | 1.40 | 34.49  | 4.64 |
| Q8BLQ9-  | Isoform 3 of Cell<br>adhesion molecule 2<br>OS=Mus musculus<br>GN=Cadm2 -<br>[CADM2_MOUSE]                      | 57.22 | 5 | 15 | 16 | 106 | 0.94 | 0.94 | 0.99 | 0.98 | 1.08 | 1.09 | 1.20 | 1.17 | 1.18 | 1.01 | 1.05 | 0.99 | 1.02 | 43.49  | 5.33 |

|        |                                                                                                                |       |    |    |    |     |      |      |      |      |      |      |      |      |      |      |      |      |      |        |       |
|--------|----------------------------------------------------------------------------------------------------------------|-------|----|----|----|-----|------|------|------|------|------|------|------|------|------|------|------|------|------|--------|-------|
| D3YV27 | Collagen alpha-2(IV) chain (Fragment)<br>OS=Mus musculus<br>GN=Col4a2 PE=2<br>SV=1 -<br>[D3YV27_MOUSE]         | 4.05  | 2  | 1  | 1  | 4   | 0.92 | 0.95 | 1.03 | 0.89 | 0.97 | 1.06 | 1.15 | 1.17 | 1.27 | 1.12 | 1.23 | 0.94 | 1.02 | 29.08  | 6.57  |
| Q7TNC4 | Isoform 2 of Putative<br>RNA-binding protein<br>Luc7-like 2 OS=Mus<br>musculus GN=Luc7l2 -<br>[LC7L2_MOUSE]    | 25.54 | 7  | 5  | 8  | 17  | 1.03 | 0.97 | 0.90 | 1.03 | 1.00 | 1.09 | 1.09 | 1.17 | 1.12 | 1.06 | 0.96 | 1.01 | 0.98 | 38.59  | 9.91  |
| B2KFM4 | Transcription factor<br>SOX-5 OS=Mus<br>musculus GN=Sox5<br>PE=2 SV=1 -<br>[B2KFM4_MOUSE]                      | 5.60  | 10 | 3  | 3  | 6   | 0.93 | 0.81 | 0.93 | 0.85 | 0.94 | 1.14 | 1.25 | 1.17 | 1.28 | 0.97 | 1.10 | 0.88 | 0.97 | 75.16  | 6.27  |
| Q0VBD2 | Protein MCM10<br>homolog OS=Mus<br>musculus GN=Mcm10<br>PE=2 SV=1 -<br>[MCM10_MOUSE]                           | 2.37  | 1  | 1  | 1  | 1   | 1.43 | 1.28 | 0.89 | 1.52 | 1.06 | 1.27 | 0.88 | 1.17 | 0.82 | 1.13 | 0.79 | 1.92 | 1.34 | 98.34  | 8.85  |
| E9Q9Q2 | Protein R3hdm1<br>OS=Mus musculus<br>GN=R3hdm1 PE=2<br>SV=1 -<br>[E9Q9Q2_MOUSE]                                | 5.55  | 1  | 2  | 4  | 9   | 1.17 | 1.22 | 1.04 | 0.96 | 0.82 | 1.11 | 0.95 | 1.17 | 1.00 | 1.05 | 0.90 | 1.07 | 0.92 | 124.31 | 8.70  |
| O35618 | Protein Mdm4<br>OS=Mus musculus<br>GN=Mdm4 PE=1<br>SV=2 -<br>[MDM4_MOUSE]                                      | 2.25  | 2  | 1  | 1  | 2   | 1.09 | 1.81 | 1.66 | 1.01 | 0.93 | 1.18 | 1.08 | 1.17 | 1.08 | 1.11 | 1.03 | 1.13 | 1.04 | 54.93  | 5.35  |
| Q62189 | U1 small nuclear<br>ribonucleoprotein A<br>OS=Mus musculus<br>GN=Smrpa PE=2 SV=3<br>- [SNRPA_MOUSE]            | 23.34 | 4  | 4  | 5  | 23  | 1.03 | 1.10 | 1.15 | 0.96 | 1.00 | 1.16 | 1.16 | 1.17 | 1.17 | 1.11 | 1.13 | 1.18 | 1.14 | 31.81  | 9.80  |
| Q91X51 | Golgi reassembly-<br>stacking protein 1<br>OS=Mus musculus<br>GN=Gorasp1 PE=2<br>SV=3 -<br>[GORS1_MOUSE]       | 15.70 | 1  | 4  | 4  | 7   | 1.10 | 1.28 | 1.11 | 1.02 | 0.93 | 1.25 | 1.18 | 1.17 | 1.04 | 1.05 | 0.91 | 1.19 | 1.03 | 46.85  | 4.65  |
| D3Z6H8 | S-adenosylmethionine<br>decarboxylase<br>proenzyme OS=Mus<br>musculus GN=Amd2<br>PE=3 SV=1 -<br>[D3Z6H8_MOUSE] | 2.40  | 2  | 1  | 1  | 2   | 0.80 | 0.76 | 0.95 | 0.75 | 0.95 | 1.09 | 1.37 | 1.17 | 1.47 | 0.95 | 1.19 | 0.92 | 1.15 | 38.27  | 6.42  |
| Q9D937 | MCGI27334 OS=Mus<br>musculus<br>GN=1810009A15Rik<br>PE=2 SV=1 -<br>[Q9D937_MOUSE]                              | 22.76 | 1  | 2  | 2  | 3   | 1.16 | 0.90 | 0.78 | 1.19 | 1.03 | 1.22 | 1.05 | 1.17 | 1.01 | 1.33 | 1.15 | 1.21 | 1.05 | 14.09  | 11.47 |
| Q3UJP5 | Protein C8orf37<br>homolog OS=Mus<br>musculus PE=1 SV=1 -<br>[CH037_MOUSE]                                     | 54.07 | 1  | 1  | 9  | 42  | 1.03 | 0.90 | 0.87 | 0.89 | 0.87 | 0.95 | 0.92 | 1.17 | 1.13 | 0.95 | 0.93 | 1.28 | 1.24 | 23.83  | 6.86  |
| D3YZP9 | Coiled-coil domain-<br>containing protein 6<br>OS=Mus musculus<br>GN=Ccdc6 PE=3<br>SV=1 -<br>[CCDC6_MOUSE]     | 38.59 | 3  | 21 | 21 | 135 | 1.04 | 0.94 | 0.92 | 0.90 | 0.87 | 1.14 | 1.10 | 1.17 | 1.13 | 1.08 | 1.05 | 1.03 | 1.00 | 52.91  | 7.34  |



|          |                                                                                                       |       |   |    |    |     |      |      |      |      |      |      |      |      |      |      |      |      |      |        |      |
|----------|-------------------------------------------------------------------------------------------------------|-------|---|----|----|-----|------|------|------|------|------|------|------|------|------|------|------|------|------|--------|------|
| Q9D4H2   | GRIP and coiled-coil domain-containing protein 1 OS=Mus musculus GN=Gcc1 PE=1 SV=2 - [GCC1_MOUSE]     | 3.34  | 2 | 2  | 2  | 9   | 0.85 | 0.96 | 1.08 | 0.94 | 1.08 | 1.13 | 1.25 | 1.17 | 1.40 | 1.04 | 1.09 | 0.96 | 1.16 | 87.62  | 5.54 |
| O35988   | Syndecan-4 OS=Mus musculus GN=Sdc4 PE=1 SV=1 - [SDC4_MOUSE]                                           | 7.07  | 1 | 1  | 1  | 3   | 1.19 | 1.00 | 0.84 | 0.99 | 0.83 | 1.31 | 1.09 | 1.17 | 0.98 | 0.99 | 0.83 | 1.06 | 0.89 | 21.47  | 4.41 |
| A2AH48   | Retrotransposon gag domain-containing protein 1 OS=Mus musculus GN=Rgag1 PE=2 SV=1 - [A2AH48_MOUSE]   | 1.90  | 3 | 1  | 1  | 3   | 1.06 | 0.92 | 0.87 | 0.85 | 0.80 | 1.66 | 1.56 | 1.17 | 1.10 | 1.10 | 1.04 | 0.64 | 0.60 | 125.40 | 6.62 |
| P10518   | Delta-aminolevulinic acid dehydratase OS=Mus musculus GN=Alad PE=1 SV=1 - [HEM2_MOUSE]                | 65.76 | 1 | 13 | 13 | 133 | 1.07 | 1.06 | 1.03 | 0.96 | 0.90 | 1.11 | 1.00 | 1.17 | 1.05 | 1.02 | 0.91 | 1.01 | 0.96 | 36.00  | 6.79 |
| E9PV44   | ATPase inhibitor, mitochondrial OS=Mus musculus GN=Atpi1 PE=2 SV=1 - [E9PV44_MOUSE]                   | 32.43 | 2 | 3  | 3  | 9   | 1.04 | 1.19 | 1.10 | 0.95 | 0.92 | 1.07 | 1.00 | 1.17 | 1.14 | 1.12 | 1.08 | 1.16 | 1.03 | 8.78   | 9.31 |
| Q9R049-2 | Isoform 2 of E3 ubiquitin-protein ligase AMFR OS=Mus musculus GN=Amfr - [AMFR_MOUSE]                  | 4.38  | 2 | 2  | 2  | 5   | 0.97 | 1.24 | 1.18 | 0.96 | 0.96 | 1.19 | 1.02 | 1.17 | 1.32 | 1.23 | 1.23 | 1.07 | 0.92 | 72.71  | 6.46 |
| E9Q1P8   | Interferon regulatory factor 2-binding protein 2 OS=Mus musculus GN=Irf2bp2 PE=1 SV=1 - [I2BP2_MOUSE] | 27.72 | 1 | 9  | 11 | 24  | 0.98 | 0.93 | 0.94 | 1.00 | 1.00 | 1.11 | 1.19 | 1.17 | 1.20 | 1.03 | 1.15 | 0.93 | 0.97 | 59.25  | 8.69 |
| Q9JMG7   | Hepatoma-derived growth factor-related protein 3 OS=Mus musculus GN=Hdgrp3 PE=1 SV=2 - [HDGR3_MOUSE]  | 38.12 | 2 | 7  | 9  | 43  | 1.18 | 0.75 | 0.63 | 1.02 | 0.89 | 1.18 | 1.03 | 1.17 | 1.07 | 1.02 | 0.88 | 1.03 | 0.86 | 22.42  | 8.40 |
| Q3TVA9   | Coiled-coil domain-containing protein 136 OS=Mus musculus GN=Ccdc136 PE=2 SV=2 - [CC136_MOUSE]        | 19.89 | 7 | 16 | 17 | 72  | 0.93 | 0.95 | 1.01 | 0.98 | 1.06 | 1.18 | 1.27 | 1.17 | 1.25 | 1.03 | 1.10 | 1.00 | 1.03 | 131.85 | 4.84 |
| B1AS06   | Disks large-associated protein 3 OS=Mus musculus GN=Dlgap3 PE=2 SV=1 - [B1AS06_MOUSE]                 | 25.88 | 2 | 15 | 15 | 46  | 0.97 | 1.00 | 1.00 | 1.03 | 1.08 | 1.10 | 1.07 | 1.17 | 1.19 | 0.93 | 1.02 | 1.05 | 1.08 | 104.61 | 8.81 |
| P56812   | Programmed cell death protein 5 OS=Mus musculus GN=Pcdc5 PE=1 SV=3 - [PDCD5_MOUSE]                    | 73.81 | 2 | 10 | 10 | 35  | 1.06 | 0.85 | 0.83 | 0.92 | 0.87 | 1.17 | 1.09 | 1.17 | 1.12 | 1.08 | 1.08 | 1.01 | 1.00 | 14.27  | 5.68 |

|          |                                                                                                               |       |    |    |    |     |      |      |      |      |      |      |      |      |      |      |      |      |      |        |       |
|----------|---------------------------------------------------------------------------------------------------------------|-------|----|----|----|-----|------|------|------|------|------|------|------|------|------|------|------|------|------|--------|-------|
| Q9JIX8-4 | Isoform 4 of Apoptotic chromatin condensation inducer in the nucleus OS=Mus musculus GN=Acin1 - [ACINU_MOUSE] | 21.65 | 11 | 22 | 22 | 83  | 1.03 | 0.90 | 0.87 | 0.97 | 0.94 | 1.18 | 1.11 | 1.17 | 1.14 | 1.11 | 1.08 | 1.04 | 1.00 | 146.21 | 6.13  |
| Q6XE40   | MAGUK p55 subfamily member 3 OS=Mus musculus GN=Mpp3 PE=2 SV=1 - [Q6XE40_MOUSE]                               | 34.02 | 3  | 14 | 14 | 29  | 0.90 | 0.94 | 1.04 | 0.98 | 1.10 | 1.07 | 1.19 | 1.17 | 1.27 | 1.04 | 1.19 | 0.97 | 1.06 | 66.45  | 6.47  |
| D3YWP3   | MCG1034428 OS=Mus musculus GN=Rp123a-ps3 PE=3 SV=1 - [D3YWP3_MOUSE]                                           | 51.28 | 7  | 10 | 10 | 73  | 1.10 | 0.77 | 0.71 | 1.08 | 0.97 | 1.16 | 1.05 | 1.17 | 1.06 | 1.11 | 1.04 | 0.97 | 0.88 | 17.69  | 10.42 |
| Q9ERG0-  | Isoform Alpha of LIM domain and actin-binding protein 1 OS=Mus musculus GN=Lima1 - [LIMA1_MOUSE]              | 20.57 | 2  | 10 | 10 | 15  | 0.99 | 0.93 | 0.93 | 0.95 | 0.99 | 1.21 | 1.16 | 1.17 | 1.18 | 0.96 | 1.02 | 0.96 | 0.97 | 65.98  | 5.91  |
| P51954   | Serine/threonine-protein kinase Nek1 OS=Mus musculus GN=Nek1 PE=1 SV=2 - [NEK1_MOUSE]                         | 1.91  | 2  | 2  | 2  | 5   | 1.17 | 0.94 | 0.80 | 1.16 | 1.06 | 1.28 | 1.20 | 1.17 | 1.17 | 1.24 | 1.15 | 1.09 | 0.98 | 136.61 | 5.45  |
| Q9DC28-  | Isoform 2 of Casein kinase 1 isoform delta OS=Mus musculus GN=Cskn1d - [KC1D_MOUSE]                           | 14.18 | 4  | 2  | 3  | 6   | 0.85 | 1.32 | 1.54 | 1.02 | 1.19 | 1.13 | 1.31 | 1.17 | 1.37 | 0.98 | 1.15 | 0.91 | 1.07 | 46.79  | 9.64  |
| Q9QY1-   | Isoform 2 of Pecanex-like protein 1 OS=Mus musculus GN=Penx - [PCX1_MOUSE]                                    | 0.44  | 2  | 1  | 1  | 4   | 1.08 | 1.31 | 1.15 | 1.15 | 1.05 | 1.05 | 0.97 | 1.17 | 1.06 | 0.92 | 0.86 | 1.03 | 0.96 | 248.01 | 7.20  |
| E9PUD0   | Zinc finger Ran-binding domain-containing protein 2 OS=Mus musculus GN=Zranb2 PE=2 SV=1 - [E9PUD0_MOUSE]      | 34.47 | 5  | 9  | 9  | 73  | 0.97 | 0.80 | 0.83 | 0.96 | 0.99 | 1.09 | 1.09 | 1.17 | 1.19 | 1.05 | 1.01 | 0.87 | 0.88 | 33.24  | 9.92  |
| B2RWE3   | CDGSH iron sulfur domain 3 OS=Mus musculus GN=Cisd3 PE=2 SV=1 - [B2RWE3_MOUSE]                                | 10.45 | 2  | 1  | 1  | 1   | 0.70 | 0.54 | 0.77 | 0.97 | 1.39 | 1.21 | 1.72 | 1.17 | 1.67 | 1.10 | 1.58 | 0.78 | 1.11 | 14.98  | 9.95  |
| Q5SUT0   | RNA-binding protein EWS OS=Mus musculus GN=Ewsr1 PE=2 SV=1 - [Q5SUT0_MOUSE]                                   | 15.70 | 4  | 8  | 8  | 130 | 1.00 | 0.89 | 0.94 | 0.94 | 0.93 | 1.17 | 1.17 | 1.17 | 1.17 | 1.08 | 1.11 | 1.00 | 1.01 | 64.95  | 9.38  |
| Q9DBR7   | Protein phosphatase 1 regulatory subunit 12A OS=Mus musculus GN=Ppp1r12a PE=1 SV=2 - [MYPT1_MOUSE]            | 43.83 | 2  | 46 | 48 | 168 | 1.06 | 0.90 | 0.85 | 0.96 | 0.93 | 1.20 | 1.14 | 1.17 | 1.11 | 1.10 | 1.03 | 0.98 | 0.95 | 114.93 | 5.49  |

|          |                                                                                                         |       |    |    |    |     |      |      |      |      |      |      |      |      |      |      |      |      |      |        |      |
|----------|---------------------------------------------------------------------------------------------------------|-------|----|----|----|-----|------|------|------|------|------|------|------|------|------|------|------|------|------|--------|------|
| Q8BVL9   | Janus kinase and microtubule-interacting protein 1 OS=Mus musculus GN=Jakmip1 PE=1 SV=2 - [JKIP1_MOUSE] | 36.42 | 7  | 19 | 21 | 52  | 1.00 | 0.97 | 1.00 | 0.91 | 0.89 | 1.14 | 1.16 | 1.17 | 1.09 | 1.06 | 1.07 | 1.05 | 1.04 | 73.09  | 6.09 |
| G3UWF6   | MCG1027453 OS=Mus musculus GN=2010015L04Rik PE=4 SV=1 - [G3UWF6_MOUSE]                                  | 15.50 | 8  | 2  | 2  | 4   | 1.01 | 0.92 | 0.97 | 0.84 | 0.85 | 1.04 | 1.11 | 1.17 | 1.16 | 1.07 | 1.14 | 1.00 | 1.07 | 14.93  | 4.86 |
| Q61768   | Kinesin-1 heavy chain OS=Mus musculus GN=Kif5b PE=1 SV=3 - [KINH_MOUSE]                                 | 46.42 | 2  | 25 | 34 | 104 | 1.01 | 0.89 | 0.97 | 0.98 | 0.94 | 1.12 | 1.08 | 1.17 | 1.17 | 1.14 | 1.11 | 1.09 | 1.07 | 109.48 | 6.44 |
| Q8K019-2 | Isoform 2 of Bcl-2-associated transcription factor 1 OS=Mus musculus GN=Belaf1 - [BCLF1_MOUSE]          | 29.23 | 4  | 24 | 25 | 87  | 1.02 | 0.90 | 0.82 | 0.94 | 0.92 | 1.13 | 1.10 | 1.17 | 1.14 | 1.09 | 1.03 | 0.92 | 0.93 | 105.76 | 9.99 |
| Q8BZB3   | Transmembrane protein C15orf27 homolog OS=Mus musculus PE=2 SV=3 - [CO027_MOUSE]                        | 10.59 | 1  | 3  | 3  | 11  | 1.07 | 1.28 | 1.19 | 1.21 | 1.13 | 1.03 | 1.01 | 1.17 | 1.09 | 1.05 | 1.04 | 1.11 | 1.00 | 58.86  | 4.87 |
| Q9CR02-2 | Isoform 2 of Translation machinery-associated protein 16 OS=Mus musculus GN=Tma16 - [TMA16_MOUSE]       | 17.72 | 2  | 2  | 2  | 4   | 1.16 | 0.85 | 0.74 | 0.95 | 0.82 | 1.23 | 1.05 | 1.17 | 1.01 | 1.07 | 0.92 | 0.97 | 0.84 | 18.36  | 6.01 |
| O89086   | Putative RNA-binding protein 3 OS=Mus musculus GN=Rbm3 PE=1 SV=1 - [RBM3_MOUSE]                         | 34.64 | 2  | 4  | 4  | 22  | 0.95 | 0.99 | 1.01 | 0.88 | 0.91 | 1.26 | 1.34 | 1.17 | 1.23 | 1.01 | 1.05 | 0.98 | 1.06 | 16.59  | 7.50 |
| A2A9W7   | ADP-ribosylation factor-binding protein GGA3 OS=Mus musculus GN=Gga3 PE=2 SV=1 - [A2A9W7_MOUSE]         | 14.22 | 3  | 7  | 7  | 17  | 0.92 | 0.98 | 1.09 | 1.08 | 1.15 | 1.05 | 1.10 | 1.17 | 1.18 | 1.11 | 1.13 | 1.13 | 1.18 | 70.15  | 6.14 |
| P17156   | Heat shock-related 70 kDa protein 2 OS=Mus musculus GN=Hspa2 PE=1 SV=2 - [HSP72_MOUSE]                  | 51.66 | 1  | 13 | 30 | 377 | 1.01 | 0.86 | 0.93 | 0.97 | 1.00 | 1.20 | 1.24 | 1.18 | 1.18 | 1.15 | 1.18 | 1.14 | 1.12 | 69.60  | 5.67 |
| Q9DBP5   | UMP-CMP kinase OS=Mus musculus GN=Cmpk1 PE=1 SV=1 - [KCY_MOUSE]                                         | 62.24 | 3  | 10 | 11 | 65  | 0.97 | 0.76 | 0.78 | 0.89 | 0.89 | 1.17 | 1.15 | 1.18 | 1.19 | 1.04 | 1.06 | 1.03 | 1.00 | 22.15  | 5.83 |
| Q6XPS7   | L-threonine aldolase OS=Mus musculus GN=Tha1 PE=2 SV=1 - [Q6XPS7_MOUSE]                                 | 5.75  | 1  | 2  | 2  | 4   | 1.08 | 1.14 | 1.06 | 1.12 | 1.04 | 1.19 | 1.10 | 1.18 | 1.09 | 1.17 | 1.08 | 1.23 | 1.14 | 43.47  | 7.20 |
| Q80TM6-  | Isoform 2 of R3H domain-containing protein 2 OS=Mus musculus GN=R3hdm2 - [R3HD2_MOUSE]                  | 15.93 | 11 | 10 | 12 | 33  | 0.89 | 1.04 | 1.10 | 0.99 | 1.09 | 1.11 | 1.23 | 1.18 | 1.26 | 1.03 | 1.14 | 0.98 | 1.09 | 108.73 | 8.69 |

|        |                                                                                                                             |       |   |    |    |     |      |      |      |      |      |      |      |      |      |      |      |      |      |        |       |
|--------|-----------------------------------------------------------------------------------------------------------------------------|-------|---|----|----|-----|------|------|------|------|------|------|------|------|------|------|------|------|------|--------|-------|
| Q99020 | Heterogeneous nuclear ribonucleoprotein A/B<br>OS=Mus musculus<br>GN=Hnrnpab PE=1<br>SV=1 -<br>[ROAA_MOUSE]                 | 44.91 | 3 | 14 | 15 | 132 | 1.01 | 0.87 | 0.87 | 0.95 | 0.93 | 1.22 | 1.15 | 1.18 | 1.17 | 1.10 | 1.10 | 1.01 | 1.03 | 30.81  | 7.91  |
| Q6WQJ1 | Sn1-specific diacylglycerol lipase alpha<br>OS=Mus musculus GN=Dagla<br>PE=1 SV=2 -<br>[DGLA_MOUSE]                         | 16.19 | 1 | 10 | 10 | 20  | 0.98 | 1.22 | 1.15 | 1.08 | 1.13 | 0.94 | 1.02 | 1.18 | 0.97 | 0.98 | 0.97 | 0.93 | 0.96 | 115.30 | 6.42  |
| Q9JKN6 | RNA-binding protein Nova-1<br>OS=Mus musculus GN=Nova1<br>PE=1 SV=2 -<br>[NOVA1_MOUSE]                                      | 7.50  | 1 | 1  | 3  | 6   | 0.73 | 0.89 | 1.22 | 0.99 | 1.35 | 1.00 | 1.36 | 1.18 | 1.60 | 0.97 | 1.32 | 1.18 | 1.62 | 51.72  | 8.72  |
| P61315 | Galactose-3-O-sulfotransferase 3<br>OS=Mus musculus<br>GN=Gal3st3 PE=2<br>SV=1 -<br>[G3ST3_MOUSE]                           | 2.78  | 1 | 1  | 1  | 2   | 1.21 | 1.45 | 1.20 | 1.03 | 0.85 | 1.00 | 0.83 | 1.18 | 0.97 | 1.16 | 0.96 | 1.38 | 1.14 | 49.25  | 9.76  |
| P63216 | Guanine nucleotide-binding protein G(I)/G(S)/G(O) subunit gamma-3<br>OS=Mus musculus GN=Gng3<br>PE=1 SV=1 -<br>[GBG3_MOUSE] | 62.67 | 1 | 3  | 3  | 162 | 0.93 | 0.96 | 0.99 | 0.98 | 1.09 | 1.23 | 1.31 | 1.18 | 1.24 | 1.09 | 1.16 | 0.93 | 1.03 | 8.30   | 7.78  |
| Q8K117 | WAS/WASL-interacting protein family member 1<br>OS=Mus musculus<br>GN=Wipf1 PE=1<br>SV=1 -<br>[WIPF1_MOUSE]                 | 14.81 | 2 | 4  | 4  | 28  | 1.01 | 1.02 | 0.96 | 0.96 | 0.92 | 1.12 | 1.06 | 1.18 | 1.28 | 1.22 | 1.17 | 1.17 | 1.11 | 50.05  | 11.41 |
| D6RDT4 | DNA polymerase epsilon subunit 3<br>OS=Mus musculus<br>GN=Pole3 PE=2 SV=1<br>- [D6RDT4_MOUSE]                               | 21.57 | 2 | 1  | 1  | 2   | 0.96 | 0.64 | 0.66 | 0.90 | 0.93 | 1.18 | 1.22 | 1.18 | 1.22 | 1.03 | 1.07 | 1.00 | 1.04 | 5.58   | 6.60  |
| Q61120 | SHC-transforming protein 3<br>OS=Mus musculus GN=Shc3<br>PE=1 SV=2 -<br>[SHC3_MOUSE]                                        | 18.99 | 1 | 8  | 8  | 19  | 0.91 | 0.83 | 1.09 | 0.91 | 1.04 | 1.09 | 1.16 | 1.18 | 1.21 | 1.03 | 1.09 | 0.99 | 1.04 | 52.09  | 7.30  |
| Q9DC19 | N-acetylneuraminatase<br>OS=Mus musculus GN=Npl<br>PE=1 SV=1 -<br>[NPL_MOUSE]                                               | 22.19 | 1 | 6  | 6  | 10  | 1.22 | 1.23 | 0.96 | 0.97 | 0.79 | 1.16 | 0.92 | 1.18 | 1.01 | 1.06 | 0.90 | 1.11 | 0.88 | 35.11  | 8.03  |
| P54797 | Transport and Golgi organization 2 homolog<br>OS=Mus musculus<br>GN=Tango2 PE=2<br>SV=1 -<br>[TNG2_MOUSE]                   | 9.42  | 4 | 2  | 2  | 4   | 1.02 | 1.01 | 0.99 | 1.16 | 1.14 | 1.08 | 1.05 | 1.18 | 1.15 | 1.16 | 1.14 | 1.07 | 1.06 | 30.93  | 5.10  |
| A0JNS2 | Igdc4 protein<br>OS=Mus musculus<br>GN=Igdc4 PE=2<br>SV=1 -<br>[A0JNS2_MOUSE]                                               | 11.20 | 5 | 2  | 2  | 4   | 0.96 | 1.13 | 1.18 | 0.92 | 0.97 | 1.21 | 1.26 | 1.18 | 1.22 | 1.10 | 1.16 | 1.06 | 1.11 | 24.98  | 4.75  |

|          |                                                                                                         |       |   |    |    |     |      |      |      |      |      |      |      |      |      |      |      |      |      |        |       |
|----------|---------------------------------------------------------------------------------------------------------|-------|---|----|----|-----|------|------|------|------|------|------|------|------|------|------|------|------|------|--------|-------|
| Q99LX5   | Multiple myeloma tumor-associated protein 2 homolog OS=Mus musculus GN=Mntag2 PE=2 SV=1 - [MMTA2_MOUSE] | 12.69 | 1 | 3  | 3  | 6   | 1.05 | 1.00 | 0.95 | 1.01 | 0.96 | 1.20 | 1.14 | 1.18 | 1.20 | 1.23 | 1.24 | 1.03 | 0.99 | 29.28  | 9.86  |
| Q8CC11   | Protein Gm17641 OS=Mus musculus GN=Gm17641 PE=2 SV=1 - [Q8CC11_MOUSE]                                   | 5.85  | 1 | 1  | 1  | 1   | 1.20 | 1.41 | 1.18 | 1.02 | 0.85 | 1.25 | 1.04 | 1.18 | 0.98 | 1.14 | 0.95 | 1.07 | 0.89 | 19.63  | 12.00 |
| Q501J6   | Probable ATP-dependent RNA helicase DDX17 OS=Mus musculus GN=Ddx17 PE=2 SV=1 - [DDX17_MOUSE]            | 37.38 | 3 | 14 | 20 | 51  | 0.92 | 0.92 | 0.98 | 0.99 | 0.98 | 1.06 | 1.24 | 1.18 | 1.18 | 1.04 | 1.13 | 1.05 | 1.10 | 72.35  | 8.59  |
| F7C957   | PDZ and LIM domain protein 2 (Fragment) OS=Mus musculus GN=Pdlim2 PE=4 SV=1 - [F7C957_MOUSE]            | 7.28  | 2 | 1  | 1  | 2   | 1.02 | 1.13 | 1.10 | 0.97 | 0.95 | 1.02 | 1.00 | 1.18 | 1.15 | 1.11 | 1.09 | 1.22 | 1.20 | 16.71  | 8.60  |
| Q5BL07-2 | Isoform 2 of Peroxisome biogenesis factor 1 OS=Mus musculus GN=Pex1 - [PEX1_MOUSE]                      | 1.13  | 2 | 1  | 1  | 1   | 0.76 | 2.24 | 2.92 | 1.11 | 1.45 | 1.06 | 1.37 | 1.18 | 1.53 | 0.92 | 1.20 | 0.89 | 1.16 | 136.66 | 6.21  |
| Q8VHV1   | Brain and acute leukemia cytoplasmic protein OS=Mus musculus GN=Baalc PE=2 SV=3 - [BAALC_MOUSE]         | 34.48 | 3 | 4  | 4  | 20  | 0.98 | 0.98 | 0.96 | 1.01 | 1.00 | 1.14 | 1.16 | 1.18 | 1.20 | 1.04 | 1.04 | 0.95 | 0.96 | 15.51  | 7.06  |
| Q80TY4   | Suppression of tumorigenicity 18 protein OS=Mus musculus GN=St18 PE=2 SV=2 - [ST18_MOUSE]               | 2.30  | 6 | 1  | 2  | 4   | 0.90 | 1.19 | 1.32 | 1.01 | 1.12 | 1.24 | 1.37 | 1.18 | 1.31 | 1.16 | 1.29 | 1.27 | 1.42 | 114.68 | 6.44  |
| A6H644   | MCG130490 OS=Mus musculus GN=Ppp1r12b PE=2 SV=1 - [A6H644_MOUSE]                                        | 33.97 | 3 | 26 | 28 | 69  | 1.02 | 0.94 | 0.98 | 0.99 | 0.95 | 1.23 | 1.19 | 1.18 | 1.12 | 1.07 | 1.02 | 1.03 | 1.00 | 110.91 | 5.74  |
| Q7TSC1   | Protein PRRC2A OS=Mus musculus GN=Prc2a PE=1 SV=1 - [PRC2A_MOUSE]                                       | 28.82 | 2 | 40 | 41 | 161 | 1.07 | 0.99 | 0.97 | 1.01 | 0.95 | 1.21 | 1.10 | 1.18 | 1.13 | 1.15 | 1.06 | 1.13 | 1.07 | 229.06 | 9.39  |
| O35387   | HCLS1-associated protein X-1 OS=Mus musculus GN=Hax1 PE=1 SV=1 - [HAX1_MOUSE]                           | 32.50 | 1 | 5  | 5  | 9   | 1.14 | 1.14 | 1.08 | 1.26 | 1.10 | 1.23 | 1.03 | 1.18 | 1.10 | 1.06 | 0.93 | 1.40 | 1.23 | 31.64  | 4.91  |
| Q9WUC3   | Lymphocyte antigen 6H OS=Mus musculus GN=Ly6h PE=2 SV=2 - [LY6H_MOUSE]                                  | 40.29 | 2 | 5  | 5  | 12  | 1.20 | 1.18 | 1.03 | 1.13 | 0.91 | 1.25 | 1.12 | 1.18 | 1.04 | 1.35 | 1.05 | 1.48 | 1.16 | 14.66  | 7.53  |
| Q05D17   | Mtv2 protein OS=Mus musculus GN=Fam89b PE=2 SV=1 - [Q05D17_MOUSE]                                       | 18.12 | 3 | 2  | 2  | 6   | 1.09 | 1.04 | 0.95 | 1.02 | 0.94 | 1.24 | 1.13 | 1.18 | 1.06 | 1.27 | 1.06 | 1.28 | 1.07 | 14.92  | 10.20 |

|        |                                                                                                                              |       |    |    |    |     |      |      |      |      |      |      |      |      |      |      |      |      |      |        |      |
|--------|------------------------------------------------------------------------------------------------------------------------------|-------|----|----|----|-----|------|------|------|------|------|------|------|------|------|------|------|------|------|--------|------|
| B1AY10 | Transcriptional repressor NF-X1<br>OS=Mus musculus<br>GN=Nfk1 PE=2 SV=1 -<br>[NFX1_MOUSE]                                    | 5.30  | 3  | 5  | 5  | 9   | 1.13 | 1.13 | 0.93 | 0.97 | 0.88 | 1.14 | 1.04 | 1.18 | 1.08 | 1.16 | 1.02 | 1.03 | 0.90 | 123.73 | 8.31 |
| H3BL05 | Zinc finger protein 428<br>(Fragment) OS=Mus musculus<br>GN=Zfp428 PE=2 SV=1 -<br>[H3BL05_MOUSE]                             | 31.37 | 3  | 3  | 3  | 17  | 1.03 | 0.95 | 0.89 | 1.04 | 0.93 | 1.24 | 1.16 | 1.18 | 1.15 | 1.04 | 1.02 | 1.02 | 0.96 | 16.31  | 4.21 |
| F8WIS9 | Calcium/calmodulin-dependent protein kinase type II subunit alpha OS=Mus musculus<br>GN=Camk2a PE=2 SV=1 -<br>[F8WIS9_MOUSE] | 53.58 | 4  | 1  | 21 | 207 | 1.40 | 1.28 | 0.91 | 1.30 | 0.93 | 0.84 | 0.60 | 1.18 | 0.84 | 0.87 | 0.62 | 1.17 | 0.84 | 55.31  | 7.44 |
| Q8R4U7 | Leucine zipper protein 1 OS=Mus musculus<br>GN=Luzp1 PE=1 SV=2 -<br>[LUZP1_MOUSE]                                            | 48.69 | 3  | 44 | 44 | 147 | 0.95 | 0.89 | 0.96 | 0.90 | 0.96 | 1.11 | 1.20 | 1.18 | 1.20 | 0.99 | 1.02 | 0.88 | 0.95 | 119.24 | 7.99 |
| Q6NZP2 | Vasculin-like protein 1 OS=Mus musculus<br>GN=Gpbp111 PE=1 SV=1 -<br>[GPBL1_MOUSE]                                           | 5.29  | 1  | 2  | 2  | 3   | 1.13 | 1.00 | 0.88 | 1.02 | 0.90 | 1.17 | 1.02 | 1.18 | 1.04 | 1.09 | 0.97 | 1.15 | 1.02 | 51.93  | 7.28 |
| P35969 | Vascular endothelial growth factor receptor 1 OS=Mus musculus<br>GN=Flt1 PE=1 SV=1 -<br>[VGFR1_MOUSE]                        | 2.10  | 17 | 2  | 3  | 6   | 1.03 | 1.24 | 1.18 | 1.02 | 0.98 | 1.02 | 0.99 | 1.18 | 1.13 | 1.13 | 1.09 | 1.17 | 1.13 | 149.78 | 8.31 |
| D3Z3G7 | Protein yippee-like 3 OS=Mus musculus<br>GN=Ypel3 PE=2 SV=1 -<br>[D3Z3G7_MOUSE]                                              | 14.46 | 3  | 1  | 1  | 2   | 0.99 | 0.95 | 0.96 | 1.00 | 1.01 | 1.19 | 1.20 | 1.18 | 1.19 | 1.00 | 1.01 | 0.94 | 0.95 | 9.10   | 8.84 |
| P99028 | Cytochrome b-c1 complex subunit 6, mitochondrial OS=Mus musculus<br>GN=Uqcrh PE=1 SV=2 -<br>[QCR6_MOUSE]                     | 74.16 | 2  | 8  | 8  | 247 | 1.07 | 0.95 | 0.87 | 0.95 | 0.88 | 1.18 | 1.08 | 1.18 | 1.08 | 1.06 | 1.02 | 1.03 | 0.95 | 10.43  | 4.87 |
| P01806 | Ig heavy chain V region 441 OS=Mus musculus<br>PE=4 SV=1 -<br>[HVM36_MOUSE]                                                  | 13.79 | 5  | 1  | 1  | 1   | 1.23 | 3.72 | 3.00 | 1.34 | 1.08 | 1.53 | 1.24 | 1.18 | 0.95 | 1.11 | 0.90 | 0.99 | 0.81 | 12.90  | 8.27 |
| Q810B9 | SLIT and NTRK-like protein 3 OS=Mus musculus<br>GN=Slitrk3 PE=2 SV=2 -<br>[SLIK3_MOUSE]                                      | 1.33  | 1  | 1  | 1  | 1   | 1.15 | 0.96 | 0.84 | 0.94 | 0.82 | 1.19 | 1.03 | 1.18 | 1.02 | 0.98 | 0.85 | 0.81 | 0.71 | 109.34 | 7.47 |
| Q8BHC9 | Alpha-(1,3)-fucosyltransferase 11 OS=Mus musculus<br>GN=Fut11 PE=2 SV=1 -<br>[FUT11_MOUSE]                                   | 4.09  | 1  | 1  | 1  | 1   | 0.92 | 0.84 | 0.92 | 0.83 | 0.90 | 1.04 | 1.12 | 1.18 | 1.28 | 1.25 | 1.36 | 0.95 | 1.03 | 55.50  | 6.23 |
| Q3UMT1 | Protein phosphatase 1 regulatory subunit 12C OS=Mus musculus<br>GN=Ppp1r12c PE=1 SV=1 -<br>[PP12C_MOUSE]                     | 41.43 | 2  | 24 | 24 | 88  | 1.07 | 1.01 | 0.94 | 0.98 | 0.91 | 1.14 | 1.06 | 1.18 | 1.06 | 1.11 | 1.01 | 1.06 | 1.00 | 84.63  | 6.00 |

|          |                                                                                                                      |       |    |    |    |    |      |      |      |      |      |      |      |      |      |      |      |      |      |       |      |
|----------|----------------------------------------------------------------------------------------------------------------------|-------|----|----|----|----|------|------|------|------|------|------|------|------|------|------|------|------|------|-------|------|
| P97461   | 40S ribosomal protein S5 OS=Mus musculus GN=Rps5 PE=2 SV=3 [R55_MOUSE]                                               | 21.08 | 3  | 4  | 4  | 9  | 1.07 | 0.91 | 0.85 | 1.12 | 1.01 | 1.18 | 1.06 | 1.18 | 1.17 | 1.20 | 1.13 | 1.20 | 1.02 | 22.88 | 9.72 |
| D3YYW8   | RNA-binding protein 42 OS=Mus musculus GN=Rbm42 PE=2 SV=1 [D3YYW8_MOUSE]                                             | 4.68  | 3  | 1  | 1  | 1  | 0.85 | 0.98 | 1.14 | 0.89 | 1.05 | 1.16 | 1.35 | 1.18 | 1.38 | 1.42 | 1.67 | 1.57 | 1.85 | 47.18 | 9.50 |
| D3YZC9   | Splicing factor 1 OS=Mus musculus GN=Sf1 PE=2 SV=1 [D3YZC9_MOUSE]                                                    | 29.95 | 10 | 12 | 12 | 99 | 1.06 | 1.06 | 0.99 | 0.97 | 0.90 | 1.11 | 1.06 | 1.18 | 1.10 | 1.11 | 1.02 | 1.13 | 1.06 | 61.72 | 9.29 |
| Q62219-2 | Isoform 2 of Transforming growth factor beta-1-induced transcript 1 protein OS=Mus musculus GN=Tgfb1i1 [TGFI1_MOUSE] | 34.01 | 11 | 9  | 9  | 23 | 0.89 | 0.87 | 1.02 | 0.87 | 0.95 | 1.06 | 1.17 | 1.18 | 1.39 | 1.16 | 1.19 | 0.92 | 1.03 | 48.20 | 7.23 |
| Q8VEB3   | UNC119-binding protein C5orf30 homolog OS=Mus musculus GN=D1Erd622e PE=2 SV=1 [CE030_MOUSE]                          | 10.14 | 1  | 2  | 2  | 3  | 0.86 | 0.96 | 1.11 | 0.90 | 1.04 | 1.10 | 1.27 | 1.18 | 1.36 | 1.01 | 1.17 | 0.96 | 1.11 | 23.12 | 9.45 |
| Q9D7P6   | Iron-sulfur cluster assembly enzyme ISCU, mitochondrial OS=Mus musculus GN=Iscu PE=1 SV=1 [ISCU_MOUSE]               | 54.17 | 4  | 9  | 9  | 25 | 1.05 | 0.93 | 0.86 | 0.93 | 0.85 | 1.10 | 1.05 | 1.18 | 1.08 | 1.09 | 1.04 | 0.99 | 0.93 | 18.09 | 9.29 |
| Q9EPU5   | Tumor necrosis factor receptor superfamily member 21 OS=Mus musculus GN=Tnfrsf21 PE=1 SV=2 [TNR21_MOUSE]             | 6.56  | 1  | 4  | 4  | 8  | 1.07 | 1.14 | 1.03 | 1.01 | 0.93 | 1.10 | 1.02 | 1.18 | 1.09 | 1.09 | 1.03 | 1.12 | 1.03 | 71.94 | 7.46 |
| P19426-2 | Isoform 2 of Negative elongation factor E OS=Mus musculus GN=Nelfe [NELFE_MOUSE]                                     | 27.25 | 3  | 7  | 7  | 23 | 1.09 | 0.99 | 0.92 | 1.01 | 0.92 | 1.18 | 1.04 | 1.18 | 1.04 | 1.12 | 1.01 | 1.08 | 0.99 | 41.46 | 9.39 |
| Q8C0L6-2 | Isoform 2 of Peroxisomal N(1)-acetyl-spermine/spermidine oxidase OS=Mus musculus GN=Paox [PAOX_MOUSE]                | 6.25  | 3  | 1  | 1  | 2  | 1.41 | 4.48 | 3.18 | 1.36 | 0.97 | 1.67 | 1.18 | 1.18 | 0.83 | 1.12 | 0.80 | 1.32 | 0.94 | 25.25 | 4.93 |
| Q9DB20   | ATP synthase subunit O, mitochondrial OS=Mus musculus GN=Atp5o PE=1 SV=1 [ATPO_MOUSE]                                | 54.93 | 3  | 12 | 12 | 81 | 0.98 | 0.94 | 0.96 | 0.97 | 0.98 | 1.20 | 1.20 | 1.18 | 1.20 | 1.13 | 1.16 | 1.10 | 1.16 | 23.35 | 9.99 |
| Q9CYL5   | Golgi-associated plant pathogenesis-related protein 1 OS=Mus musculus GN=Glpr2 PE=2 SV=3 [GAPR1_MOUSE]               | 16.88 | 2  | 2  | 2  | 8  | 1.16 | 1.12 | 0.99 | 1.00 | 0.87 | 1.24 | 1.08 | 1.18 | 1.03 | 1.19 | 1.07 | 1.13 | 0.99 | 17.08 | 9.51 |
| E9Q941   | Protein Cdh18 OS=Mus musculus GN=Cdh18 PE=2 SV=1 [E9Q941_MOUSE]                                                      | 2.26  | 2  | 1  | 1  | 2  | 1.16 | 1.15 | 0.99 | 1.10 | 0.95 | 1.13 | 0.97 | 1.18 | 1.01 | 1.18 | 1.02 | 1.04 | 0.89 | 63.41 | 5.62 |

|          |                                                                                                                                                  |       |    |    |    |     |      |      |      |      |      |      |      |      |      |      |      |      |      |        |      |
|----------|--------------------------------------------------------------------------------------------------------------------------------------------------|-------|----|----|----|-----|------|------|------|------|------|------|------|------|------|------|------|------|------|--------|------|
| Q3U3E2   | Protein FAM117B<br>OS=Mus musculus<br>GN=Fam117b PE=1<br>SV=1 -<br>[F117B_MOUSE]                                                                 | 18.15 | 1  | 7  | 7  | 32  | 1.04 | 0.97 | 0.90 | 0.97 | 0.87 | 1.10 | 1.00 | 1.18 | 1.04 | 1.06 | 0.99 | 1.07 | 0.98 | 61.31  | 9.95 |
| Q80XP8   | Protein FAM76B<br>OS=Mus musculus<br>GN=Fam76b PE=2<br>SV=1 -<br>[FA76B_MOUSE]                                                                   | 7.37  | 3  | 2  | 2  | 4   | 1.02 | 1.36 | 1.47 | 1.02 | 1.00 | 1.21 | 1.18 | 1.18 | 1.15 | 1.20 | 1.18 | 1.13 | 1.10 | 38.53  | 9.29 |
| O08539   | Myc box-dependent-<br>interacting protein 1<br>OS=Mus musculus<br>GN=Bin1 PE=1 SV=1 -<br>[BIN1_MOUSE]                                            | 56.12 | 1  | 3  | 30 | 771 | 0.97 | 0.99 | 1.00 | 0.89 | 0.94 | 1.09 | 1.10 | 1.18 | 1.20 | 1.09 | 1.12 | 1.11 | 1.17 | 64.43  | 5.03 |
| Q99KS2   | Neugrin OS=Mus<br>musculus GN=Ngn<br>PE=2 SV=3 -<br>[NGRN_MOUSE]                                                                                 | 4.44  | 1  | 1  | 1  | 2   | 1.07 | 1.06 | 0.99 | 0.99 | 0.93 | 1.19 | 1.11 | 1.18 | 1.10 | 1.15 | 1.08 | 1.26 | 1.19 | 32.43  | 8.90 |
| I1E4X0   | Disks large-associated<br>protein 4 OS=Mus<br>musculus GN=Dlgap4<br>PE=4 SV=1 -<br>[I1E4X0_MOUSE]                                                | 40.57 | 6  | 2  | 11 | 39  | 1.12 | 0.80 | 0.72 | 1.01 | 0.90 | 1.14 | 1.01 | 1.18 | 1.05 | 1.01 | 0.90 | 1.03 | 0.92 | 26.89  | 4.88 |
| Q6PD31-2 | Isoform 2 of<br>Trafficking kinesin-<br>binding protein 1<br>OS=Mus musculus<br>GN=Trak1 -<br>[TRAK1_MOUSE]                                      | 4.43  | 2  | 2  | 2  | 2   | 0.75 | 0.75 | 1.00 | 0.83 | 1.09 | 0.86 | 1.13 | 1.18 | 1.56 | 0.86 | 1.14 | 0.96 | 1.28 | 69.57  | 5.19 |
| F6VAL0   | Mitochondrial fission<br>factor (Fragment)<br>OS=Mus musculus<br>GN=MIT PE=4 SV=1 -<br>[F6VAL0_MOUSE]                                            | 52.38 | 2  | 1  | 4  | 10  | 0.87 | 1.27 | 1.46 | 0.96 | 1.10 | 1.16 | 1.34 | 1.18 | 1.36 | 1.18 | 1.37 | 1.15 | 1.33 | 16.29  | 5.17 |
| F8VPM7   | ELKS/Rab6-<br>interacting/CAST<br>family member 1<br>OS=Mus musculus<br>GN=Erc1 PE=2 SV=1 -<br>[F8VPM7_MOUSE]                                    | 36.34 | 3  | 2  | 44 | 161 | 0.97 | 1.15 | 1.12 | 0.97 | 1.01 | 1.07 | 1.04 | 1.18 | 1.23 | 1.01 | 1.12 | 1.20 | 1.17 | 128.25 | 5.91 |
| D3YX85   | Arf-GAP with SH3<br>domain, ANK repeat<br>and PH domain-<br>containing protein 2<br>OS=Mus musculus<br>GN=Asap2 PE=2<br>SV=2 -<br>[D3YX85_MOUSE] | 15.08 | 3  | 1  | 10 | 25  | 1.00 | 0.95 | 0.94 | 0.99 | 0.98 | 1.02 | 1.01 | 1.18 | 1.17 | 1.08 | 1.08 | 1.01 | 1.01 | 106.34 | 6.54 |
| Q8R034   | Anaphase-promoting<br>complex subunit 13<br>OS=Mus musculus<br>GN=Anapc13 PE=2<br>SV=1 -<br>[APC13_MOUSE]                                        | 79.73 | 1  | 3  | 3  | 9   | 1.10 | 1.08 | 1.06 | 0.96 | 0.98 | 1.16 | 1.06 | 1.18 | 1.21 | 1.16 | 1.06 | 1.09 | 1.15 | 8.34   | 4.18 |
| Q5RIM6   | Nuclear receptor co-<br>repressor 1, isoform<br>CRA_a OS=Mus<br>musculus GN=Ncor1<br>PE=4 SV=1 -<br>[Q5RIM6_MOUSE]                               | 6.85  | 15 | 10 | 12 | 22  | 1.00 | 0.97 | 0.99 | 0.95 | 0.96 | 1.10 | 1.05 | 1.18 | 1.10 | 1.15 | 1.06 | 1.12 | 1.07 | 270.62 | 6.93 |



|          |                                                                                                     |       |    |    |    |     |      |      |      |      |      |      |      |      |      |      |      |      |      |        |      |
|----------|-----------------------------------------------------------------------------------------------------|-------|----|----|----|-----|------|------|------|------|------|------|------|------|------|------|------|------|------|--------|------|
| F8VQJ3   | Laminin subunit gamma-1 OS=Mus musculus GN=Lamc1 PE=2 SV=1 - [F8VQJ3_MOUSE]                         | 10.52 | 4  | 14 | 14 | 23  | 0.96 | 1.05 | 1.05 | 0.90 | 0.96 | 1.05 | 1.08 | 1.18 | 1.22 | 1.15 | 1.10 | 1.05 | 0.98 | 177.07 | 5.19 |
| F7DBB3   | Protein Ahnak2 (Fragment) OS=Mus musculus GN=Ahnak2 PE=2 SV=1 - [F7DBB3_MOUSE]                      | 19.73 | 1  | 2  | 11 | 18  | 1.02 | 0.79 | 0.78 | 0.89 | 0.87 | 1.17 | 1.14 | 1.18 | 1.15 | 1.17 | 1.15 | 1.01 | 0.99 | 166.39 | 5.78 |
| B1AR74   | Breast carcinoma-amplified sequence 3 homolog OS=Mus musculus GN=Bcas3 PE=4 SV=1 - [B1AR74_MOUSE]   | 13.26 | 3  | 1  | 10 | 31  | 1.21 | 0.88 | 0.72 | 1.03 | 0.85 | 1.25 | 1.02 | 1.18 | 0.97 | 1.12 | 0.93 | 1.15 | 0.95 | 102.71 | 7.49 |
| Q6P8I4   | PEST proteolytic signal-containing nuclear protein OS=Mus musculus GN=Pcnp PE=1 SV=1 - [PCNP_MOUSE] | 56.74 | 4  | 7  | 7  | 36  | 1.05 | 0.98 | 0.91 | 0.93 | 0.90 | 1.13 | 1.08 | 1.18 | 1.12 | 1.11 | 1.05 | 1.07 | 1.02 | 18.95  | 7.49 |
| Q80X50   | Ubiquitin-associated protein 2-like OS=Mus musculus GN=Ubap2l PE=1 SV=1 - [UBP2L_MOUSE]             | 35.50 | 4  | 2  | 25 | 79  | 1.09 | 0.78 | 0.68 | 0.88 | 0.82 | 1.13 | 1.01 | 1.18 | 1.09 | 1.00 | 0.94 | 0.94 | 0.88 | 116.73 | 7.11 |
| O54988-2 | Isoform 2 of STE20-like serine/threonine-protein kinase OS=Mus musculus GN=Slk - [SLK_MOUSE]        | 39.02 | 5  | 28 | 30 | 80  | 1.00 | 0.93 | 0.97 | 0.87 | 0.93 | 1.15 | 1.15 | 1.18 | 1.28 | 1.11 | 1.14 | 1.06 | 1.09 | 137.63 | 5.08 |
| Q9DC07   | LIM zinc-binding domain-containing Nebulette OS=Mus musculus GN=Nubl PE=2 SV=1 - [LNEBL_MOUSE]      | 85.56 | 6  | 9  | 20 | 229 | 1.01 | 0.88 | 0.86 | 0.96 | 0.93 | 1.15 | 1.13 | 1.18 | 1.14 | 1.02 | 1.02 | 0.95 | 0.96 | 31.09  | 8.31 |
| Q7TQF7   | Amphiphysin OS=Mus musculus GN=Amph PE=1 SV=1 - [AMPH_MOUSE]                                        | 56.41 | 1  | 28 | 30 | 308 | 0.98 | 0.85 | 0.88 | 0.85 | 0.89 | 1.14 | 1.17 | 1.18 | 1.23 | 1.02 | 1.05 | 0.97 | 1.02 | 74.97  | 4.63 |
| P29595   | NEDD8 OS=Mus musculus GN=Nedd8 PE=1 SV=2 - [NEDD8_MOUSE]                                            | 53.09 | 1  | 5  | 5  | 84  | 1.02 | 0.99 | 0.98 | 0.93 | 0.93 | 1.11 | 1.12 | 1.18 | 1.13 | 1.08 | 1.12 | 1.08 | 1.04 | 8.97   | 7.25 |
| D3Z5F7   | Protein Gm20521 OS=Mus musculus GN=Gm20521 PE=2 SV=1 - [D3Z5F7_MOUSE]                               | 33.33 | 11 | 8  | 8  | 17  | 1.00 | 0.92 | 0.94 | 0.90 | 0.97 | 1.15 | 1.26 | 1.18 | 1.34 | 1.00 | 1.15 | 1.12 | 1.22 | 37.22  | 8.40 |
| Q5UE59   | Kinesin light chain 1 OS=Mus musculus GN=Klc1 PE=2 SV=1 - [Q5UE59_MOUSE]                            | 54.43 | 8  | 19 | 25 | 96  | 0.99 | 0.81 | 0.86 | 0.85 | 0.85 | 1.09 | 1.14 | 1.18 | 1.19 | 1.02 | 1.02 | 0.98 | 1.04 | 61.59  | 5.76 |
| Q8VHR5   | Transcriptional repressor p66-beta OS=Mus musculus GN=Gata2b PE=1 SV=1 - [P66B_MOUSE]               | 36.20 | 2  | 13 | 13 | 50  | 1.02 | 0.99 | 0.96 | 0.97 | 0.94 | 1.14 | 1.19 | 1.18 | 1.16 | 1.12 | 1.11 | 1.16 | 1.09 | 65.37  | 9.70 |

|          |                                                                                                         |       |   |    |    |     |      |      |      |      |      |      |      |      |      |      |      |      |      |        |      |
|----------|---------------------------------------------------------------------------------------------------------|-------|---|----|----|-----|------|------|------|------|------|------|------|------|------|------|------|------|------|--------|------|
| Q6P6N5   | Sprouty-related, EVH1 domain-containing protein 3 OS=Mus musculus GN=Spred3 PE=2 SV=1 - [SPRE3_MOUSE]   | 10.29 | 1 | 3  | 3  | 6   | 1.00 | 1.15 | 1.10 | 0.94 | 0.94 | 1.14 | 1.13 | 1.18 | 1.19 | 1.09 | 1.04 | 1.11 | 1.11 | 42.77  | 8.34 |
| Q8BWW4   | Metallo-beta-lactamase domain-containing protein 1 OS=Mus musculus GN=Mblac1 PE=2 SV=1 - [MBLC1_MOUSE]  | 4.23  | 1 | 1  | 1  | 2   | 1.15 | 0.69 | 0.60 | 0.91 | 0.79 | 1.19 | 1.03 | 1.18 | 1.03 | 1.08 | 0.94 | 0.89 | 0.78 | 26.91  | 4.88 |
| P12961   | Neuroendocrine protein 7B2 OS=Mus musculus GN=Scg5 PE=1 SV=1 - [7B2_MOUSE]                              | 42.92 | 1 | 7  | 7  | 34  | 1.23 | 0.90 | 0.73 | 1.04 | 0.83 | 1.15 | 0.94 | 1.18 | 0.95 | 1.09 | 0.89 | 1.04 | 0.86 | 23.85  | 5.81 |
| P60853   | Leucine zipper putative tumor suppressor 1 OS=Mus musculus GN=Lzts1 PE=2 SV=3 - [LZTS1_MOUSE]           | 22.54 | 1 | 13 | 13 | 22  | 1.00 | 0.88 | 0.97 | 0.94 | 0.98 | 1.17 | 1.23 | 1.18 | 1.18 | 1.09 | 1.18 | 0.93 | 1.07 | 67.25  | 7.56 |
| Q99NE5-7 | Isoform 7 of Regulating synaptic membrane exocytosis protein 1 OS=Mus musculus GN=Rims1 - [RIMS1_MOUSE] | 34.97 | 3 | 2  | 29 | 79  | 0.81 | 1.03 | 1.21 | 1.03 | 1.29 | 1.04 | 1.22 | 1.18 | 1.40 | 1.10 | 1.32 | 0.85 | 1.12 | 132.91 | 9.33 |
| Q8CIN6   | CUGBP Elav-like family member 3 OS=Mus musculus GN=Celf3 PE=2 SV=1 - [CELF3_MOUSE]                      | 7.31  | 2 | 1  | 2  | 5   | 1.03 | 0.75 | 0.73 | 0.75 | 0.73 | 1.14 | 1.10 | 1.18 | 1.15 | 0.91 | 0.89 | 0.93 | 0.91 | 50.49  | 8.68 |
| A2A5Y6   | Microtubule-associated protein tau OS=Mus musculus GN=Mapt PE=2 SV=1 - [A2A5Y6_MOUSE]                   | 61.01 | 5 | 12 | 45 | 748 | 1.01 | 0.91 | 0.92 | 0.86 | 0.86 | 1.14 | 1.13 | 1.18 | 1.16 | 1.00 | 0.96 | 0.87 | 0.89 | 78.04  | 6.51 |
| Q8BYN3   | Inositol-tetrakisphosphate 1-kinase OS=Mus musculus GN=Itpk1 PE=2 SV=1 - [ITPK1_MOUSE]                  | 5.01  | 1 | 1  | 1  | 4   | 0.96 | 1.28 | 1.33 | 1.18 | 1.22 | 0.93 | 0.96 | 1.18 | 1.23 | 0.99 | 1.03 | 1.23 | 1.28 | 46.12  | 6.29 |
| Q6A028   | Switch-associated protein 70 OS=Mus musculus GN=Swap70 PE=1 SV=2 - [SWP70_MOUSE]                        | 11.28 | 1 | 5  | 5  | 7   | 0.97 | 1.18 | 1.22 | 0.99 | 1.00 | 1.08 | 1.11 | 1.18 | 1.16 | 1.11 | 1.14 | 1.07 | 1.13 | 68.95  | 6.05 |
| Q9D7M8   | DNA-directed RNA polymerase II subunit RPB4 OS=Mus musculus GN=Polr2d PE=2 SV=2 - [RPB4_MOUSE]          | 11.27 | 1 | 1  | 1  | 2   | 0.77 | 0.67 | 0.87 | 0.91 | 1.18 | 1.23 | 1.59 | 1.18 | 1.53 | 1.03 | 1.34 | 0.90 | 1.17 | 16.30  | 4.79 |
| E9Q6J5   | Protein Bod11 OS=Mus musculus GN=Bod11 PE=2 SV=1 - [E9Q6J5_MOUSE]                                       | 9.40  | 1 | 15 | 17 | 33  | 1.04 | 0.99 | 0.98 | 0.97 | 0.89 | 1.21 | 1.13 | 1.18 | 1.15 | 1.11 | 1.07 | 1.09 | 1.08 | 327.25 | 5.33 |

|          |                                                                                                       |       |   |    |    |    |      |      |      |      |      |      |      |      |      |      |      |      |      |        |      |
|----------|-------------------------------------------------------------------------------------------------------|-------|---|----|----|----|------|------|------|------|------|------|------|------|------|------|------|------|------|--------|------|
| E9Q9V3   | Nuclear receptor corepressor 2 OS=Mus musculus GN=Ncor2 PE=2 SV=1 - [E9Q9V3_MOUSE]                    | 7.29  | 8 | 11 | 13 | 26 | 1.07 | 0.89 | 0.91 | 1.03 | 0.96 | 1.18 | 1.07 | 1.18 | 1.10 | 1.14 | 1.03 | 1.07 | 1.02 | 253.70 | 7.56 |
| Q91UZ8   | MCGI41285 OS=Mus musculus GN=Pcdhb11 PE=2 SV=1 - [Q91UZ8_MOUSE]                                       | 2.38  | 8 | 2  | 2  | 2  | 1.17 | 1.07 | 0.91 | 1.05 | 0.90 | 1.21 | 1.03 | 1.18 | 1.01 | 1.27 | 1.09 | 1.08 | 0.93 | 87.61  | 4.73 |
| Q9DBG5   | Perilipin-3 OS=Mus musculus GN=Pin3 PE=1 SV=1 - [PLIN3_MOUSE]                                         | 31.58 | 1 | 9  | 9  | 17 | 1.02 | 1.00 | 1.06 | 0.90 | 0.96 | 1.14 | 1.12 | 1.18 | 1.14 | 1.16 | 1.09 | 1.05 | 1.12 | 47.23  | 5.62 |
| Q9CX60   | Protein LBH OS=Mus musculus GN=Lbh PE=1 SV=1 - [LBH_MOUSE]                                            | 80.95 | 2 | 6  | 6  | 19 | 1.01 | 0.95 | 0.91 | 0.91 | 0.85 | 1.16 | 1.12 | 1.18 | 1.16 | 1.10 | 1.02 | 0.99 | 0.95 | 12.13  | 4.31 |
| Q76LS9-2 | Isoform 2 of Protein FAM63A OS=Mus musculus GN=Fam63a - [FA63A_MOUSE]                                 | 2.61  | 2 | 1  | 1  | 2  | 1.06 | 0.89 | 0.84 | 1.26 | 1.18 | 1.11 | 1.05 | 1.18 | 1.11 | 1.11 | 1.05 | 1.08 | 1.02 | 50.18  | 4.74 |
| Q5SP85-2 | Isoform 2 of Coiled-coil domain-containing protein 85A OS=Mus musculus GN=Ccdc85a - [CC85A_MOUSE]     | 29.35 | 4 | 9  | 10 | 31 | 0.98 | 0.94 | 0.92 | 0.91 | 0.93 | 1.15 | 1.19 | 1.18 | 1.19 | 1.06 | 1.00 | 0.98 | 1.02 | 50.39  | 8.00 |
| Q8BFY6   | Peflin OS=Mus musculus GN=Pef1 PE=2 SV=1 - [PEF1_MOUSE]                                               | 7.64  | 1 | 2  | 2  | 2  | 1.30 | 1.08 | 0.83 | 1.09 | 0.84 | 0.89 | 0.69 | 1.18 | 0.91 | 1.12 | 0.86 | 1.02 | 0.79 | 29.21  | 6.30 |
| Q80YR4-3 | Isoform 2 of Zinc finger protein 598 OS=Mus musculus GN=Znf598 - [ZNF598_MOUSE]                       | 7.95  | 3 | 5  | 5  | 10 | 0.89 | 0.95 | 1.09 | 0.90 | 0.98 | 1.19 | 1.34 | 1.18 | 1.30 | 1.06 | 1.17 | 1.02 | 1.13 | 96.28  | 8.29 |
| Q8K2L8   | Trafficking protein particle complex subunit 12 OS=Mus musculus GN=Trappc12 PE=1 SV=2 - [TPC12_MOUSE] | 11.29 | 2 | 5  | 5  | 9  | 0.97 | 1.00 | 0.99 | 1.04 | 1.03 | 1.03 | 1.08 | 1.18 | 1.12 | 1.05 | 1.10 | 1.15 | 1.22 | 87.64  | 4.81 |
| O08715-2 | Isoform 1 of A-kinase anchor protein 1, mitochondrial OS=Mus musculus GN=Akap1 - [AKAP1_MOUSE]        | 24.45 | 6 | 7  | 7  | 10 | 0.98 | 0.84 | 0.79 | 0.94 | 0.96 | 1.16 | 1.16 | 1.18 | 1.10 | 1.16 | 1.11 | 1.13 | 1.08 | 57.64  | 4.94 |
| Q9CRB2   | H/ACA ribonucleoprotein complex subunit 2 OS=Mus musculus GN=Nhp2 PE=2 SV=1 - [NHP2_MOUSE]            | 30.07 | 1 | 3  | 3  | 8  | 1.01 | 0.95 | 0.88 | 1.01 | 1.00 | 1.18 | 1.05 | 1.19 | 1.17 | 1.19 | 1.19 | 1.03 | 1.01 | 17.24  | 8.41 |
| Q99LA2   | Protein Zip207 OS=Mus musculus GN=Zip207 PE=2 SV=1 - [Q99LA2_MOUSE]                                   | 17.24 | 6 | 7  | 7  | 30 | 1.02 | 0.96 | 0.96 | 0.98 | 0.94 | 1.19 | 1.15 | 1.19 | 1.17 | 1.11 | 1.09 | 1.05 | 0.95 | 49.76  | 9.10 |
| A2AR78   | TRAF family member-associated NF-kappa-B activator OS=Mus musculus GN=Tank PE=2 SV=1 - [A2AR78_MOUSE] | 21.94 | 7 | 5  | 5  | 6  | 0.91 | 0.86 | 0.98 | 0.79 | 1.02 | 1.33 | 1.32 | 1.19 | 1.28 | 0.98 | 1.08 | 0.89 | 0.93 | 40.88  | 5.66 |

|          |                                                                                                                     |       |     |    |    |     |      |      |      |      |      |      |      |      |      |      |      |      |      |        |      |
|----------|---------------------------------------------------------------------------------------------------------------------|-------|-----|----|----|-----|------|------|------|------|------|------|------|------|------|------|------|------|------|--------|------|
| F6VCZ4   | Uncharacterized protein OS=Mus musculus GN=Zfp422-rs1 PE=4 SV=2 - [F6VCZ4_MOUSE]                                    | 14.48 | 153 | 1  | 2  | 3   | 0.94 | 1.44 | 1.52 | 0.94 | 1.00 | 1.30 | 1.37 | 1.19 | 1.25 | 1.23 | 1.31 | 1.42 | 1.51 | 16.86  | 9.26 |
| Q80YE4   | Isoform 4 of Serine/threonine-protein kinase LMTK1 OS=Mus musculus GN=Aatk - [LMTK1_MOUSE]                          | 19.29 | 6   | 12 | 12 | 23  | 1.03 | 1.06 | 1.03 | 1.07 | 1.04 | 1.20 | 1.15 | 1.19 | 1.15 | 1.12 | 1.08 | 1.01 | 0.95 | 127.46 | 4.49 |
| B9EHL3   | Ppp1r3f protein OS=Mus musculus GN=Ppp1r3f PE=2 SV=1 - [B9EHL3_MOUSE]                                               | 2.04  | 4   | 1  | 1  | 2   | 1.21 | 1.76 | 1.46 | 1.24 | 1.03 | 1.23 | 1.01 | 1.19 | 0.98 | 1.13 | 0.94 | 1.13 | 0.94 | 77.42  | 4.59 |
| Q9EPJ9-2 | Isoform 2 of ADP-ribosylation factor GTPase-activating protein 1 OS=Mus musculus GN=Arfgap1 - [ARFG1_MOUSE]         | 53.32 | 3   | 19 | 19 | 326 | 1.03 | 0.99 | 0.97 | 0.96 | 0.94 | 1.16 | 1.14 | 1.19 | 1.15 | 1.07 | 1.05 | 1.04 | 1.01 | 42.93  | 5.54 |
| E9QNS2   | Leucine-rich repeat flightless-interacting protein 2 OS=Mus musculus GN=Lrflp2 PE=2 SV=1 - [E9QNS2_MOUSE]           | 39.52 | 3   | 12 | 15 | 60  | 1.04 | 0.96 | 0.94 | 0.88 | 0.89 | 1.07 | 1.10 | 1.19 | 1.21 | 1.01 | 0.96 | 1.01 | 0.90 | 47.10  | 5.68 |
| O09174   | Alpha-methylacyl-CoA racemase OS=Mus musculus GN=Amacr PE=1 SV=4 - [AMACR_MOUSE]                                    | 12.34 | 1   | 2  | 2  | 2   | 0.98 | 1.02 | 1.04 | 1.10 | 1.12 | 1.20 | 1.23 | 1.19 | 1.21 | 1.60 | 1.64 | 0.93 | 0.95 | 41.68  | 7.40 |
| O08532-2 | Isoform 2B of Voltage-dependent calcium channel subunit alpha-2/delta-1 OS=Mus musculus GN=Cacna2d1 - [CA2D1_MOUSE] | 42.16 | 4   | 1  | 33 | 148 | 0.90 | 1.19 | 1.32 | 1.17 | 1.30 | 1.05 | 1.16 | 1.19 | 1.31 | 1.16 | 1.29 | 1.24 | 1.38 | 122.44 | 5.20 |
| E9QKK1   | Centromere-associated protein E OS=Mus musculus GN=Cenpe PE=3 SV=1 - [E9QKK1_MOUSE]                                 | 1.01  | 2   | 1  | 3  | 5   | 1.09 | 0.99 | 0.91 | 0.90 | 0.83 | 1.19 | 1.09 | 1.19 | 1.09 | 1.05 | 0.97 | 0.94 | 0.87 | 286.04 | 5.33 |
| Q8K199   | COX assembly mitochondrial protein 2 homolog OS=Mus musculus GN=Cmc2 PE=2 SV=1 - [COXM2_MOUSE]                      | 53.16 | 5   | 3  | 3  | 10  | 0.91 | 1.04 | 1.11 | 0.91 | 1.00 | 1.08 | 1.14 | 1.19 | 1.30 | 0.92 | 0.97 | 0.90 | 0.96 | 9.41   | 8.24 |
| A2ANP1   | 2310028H24Rik protein OS=Mus musculus GN=Fam219a PE=2 SV=1 - [A2ANP1_MOUSE]                                         | 53.57 | 1   | 1  | 4  | 35  | 0.87 | 0.99 | 1.24 | 0.93 | 1.03 | 1.14 | 1.20 | 1.19 | 1.25 | 1.10 | 1.27 | 1.01 | 1.21 | 18.64  | 4.70 |
| Q922H9-2 | Isoform 2 of Zinc finger protein 330 OS=Mus musculus GN=ZnF330 - [ZN330_MOUSE]                                      | 11.90 | 2   | 3  | 3  | 15  | 1.12 | 1.10 | 0.88 | 1.01 | 0.91 | 1.13 | 1.00 | 1.19 | 1.05 | 1.11 | 0.97 | 1.01 | 0.90 | 34.87  | 6.44 |

|          |                                                                                                          |       |   |    |    |     |      |      |      |      |      |      |      |      |      |      |      |      |      |       |      |
|----------|----------------------------------------------------------------------------------------------------------|-------|---|----|----|-----|------|------|------|------|------|------|------|------|------|------|------|------|------|-------|------|
| Q9CQE5   | Regulator of G-protein signaling 10 OS=Mus musculus GN=Rgs10 PE=2 SV=1 - [RGS10_MOUSE]                   | 43.09 | 2 | 6  | 6  | 37  | 0.99 | 0.83 | 0.84 | 0.89 | 0.91 | 1.06 | 1.06 | 1.19 | 1.11 | 1.03 | 1.02 | 0.97 | 0.98 | 21.14 | 6.81 |
| Q9JLQ0   | CD2-associated protein OS=Mus musculus GN=Cd2ap PE=1 SV=3 - [CD2AP_MOUSE]                                | 26.84 | 1 | 15 | 15 | 35  | 1.09 | 0.91 | 0.81 | 0.95 | 0.85 | 1.17 | 1.04 | 1.19 | 1.08 | 1.09 | 1.02 | 0.99 | 0.91 | 70.41 | 6.38 |
| Q8R344   | Coiled-coil domain-containing protein 12 OS=Mus musculus GN=Ccdc12 PE=1 SV=2 - [CCD12_MOUSE]             | 39.16 | 1 | 6  | 6  | 18  | 1.11 | 0.86 | 0.73 | 1.04 | 0.82 | 1.28 | 1.06 | 1.19 | 0.97 | 1.08 | 0.85 | 0.95 | 0.86 | 18.88 | 7.21 |
| Q9DCB8   | Iron-sulfur cluster assembly 2 homolog, mitochondrial OS=Mus musculus GN=Isca2 PE=2 SV=2 - [ISCA2_MOUSE] | 37.66 | 1 | 5  | 5  | 12  | 1.05 | 0.85 | 0.82 | 0.91 | 0.89 | 1.24 | 1.17 | 1.19 | 1.12 | 1.06 | 1.04 | 1.00 | 0.94 | 16.71 | 5.60 |
| Q923D5   | WW domain-binding protein 11 OS=Mus musculus GN=Wbp11 PE=1 SV=2 - [WBP11_MOUSE]                          | 25.27 | 1 | 17 | 17 | 35  | 1.10 | 0.97 | 0.92 | 0.99 | 0.97 | 1.17 | 1.12 | 1.19 | 1.05 | 1.07 | 1.04 | 1.03 | 0.96 | 69.83 | 8.40 |
| Q9CQT5   | Proteasome maturation protein OS=Mus musculus GN=Pomp PE=2 SV=1 - [POMP_MOUSE]                           | 10.64 | 1 | 2  | 2  | 2   | 1.05 | 0.85 | 0.81 | 0.94 | 0.89 | 1.18 | 1.11 | 1.19 | 1.13 | 1.17 | 1.11 | 1.12 | 1.07 | 15.76 | 5.49 |
| P16951-2 | Isoform 2 of Cyclic AMP-dependent transcription factor ATF-2 OS=Mus musculus GN=Atf2 - [ATF2_MOUSE]      | 27.51 | 8 | 8  | 10 | 24  | 1.02 | 0.95 | 0.97 | 1.00 | 0.94 | 1.16 | 1.16 | 1.19 | 1.16 | 1.16 | 1.11 | 1.07 | 1.04 | 42.32 | 7.17 |
| Q77QD2   | Tubulin polymerization-promoting protein OS=Mus musculus GN=Tppp PE=1 SV=1 - [TPPP_MOUSE]                | 67.43 | 1 | 17 | 17 | 558 | 1.02 | 0.93 | 0.90 | 0.96 | 0.93 | 1.15 | 1.12 | 1.19 | 1.15 | 1.09 | 1.07 | 1.04 | 1.02 | 23.56 | 9.42 |
| Q99KW3   | Isoform 1 of TRIO and F-actin-binding protein OS=Mus musculus GN=Triobb - [TARA_MOUSE]                   | 2.76  | 7 | 1  | 2  | 2   | 1.00 | 0.78 | 0.78 | 1.03 | 1.03 | 1.16 | 1.16 | 1.19 | 1.19 | 1.13 | 1.13 | 0.93 | 0.94 | 66.94 | 6.30 |
| Q3ULL6   | Protein Upf3b OS=Mus musculus GN=Upf3b PE=2 SV=1 - [Q3ULL6_MOUSE]                                        | 28.18 | 1 | 6  | 10 | 18  | 1.10 | 0.96 | 0.99 | 1.09 | 0.90 | 1.11 | 1.05 | 1.19 | 1.05 | 1.31 | 1.09 | 1.09 | 1.00 | 57.03 | 9.44 |
| P56183-2 | Isoform 2 of Ribosomal RNA processing protein 1 homolog A OS=Mus musculus GN=Rrp1 - [RRP1_MOUSE]         | 3.84  | 3 | 1  | 1  | 3   | 0.71 | 1.07 | 1.49 | 1.03 | 1.44 | 1.11 | 1.54 | 1.19 | 1.71 | 1.12 | 1.57 | 1.73 | 2.50 | 49.98 | 8.24 |
| Q61286-2 | Isoform ALF1A of Transcription factor 12 OS=Mus musculus GN=Tcf12 - [HTF4_MOUSE]                         | 4.11  | 3 | 1  | 2  | 2   | 1.07 | 1.20 | 1.11 | 0.89 | 0.83 | 1.09 | 1.01 | 1.19 | 1.10 | 1.14 | 1.06 | 1.26 | 1.18 | 72.89 | 7.02 |

|          |                                                                                                            |       |   |    |    |     |      |      |      |      |      |      |      |      |      |      |      |      |      |        |       |
|----------|------------------------------------------------------------------------------------------------------------|-------|---|----|----|-----|------|------|------|------|------|------|------|------|------|------|------|------|------|--------|-------|
| E9Q7Q3   | Tropomyosin alpha-3 chain OS=Mus musculus GN=Tpm3 PE=2 SV=1 - [E9Q7Q3_MOUSE]                               | 60.08 | 3 | 2  | 22 | 418 | 1.04 | 0.92 | 0.88 | 0.97 | 0.91 | 1.36 | 1.36 | 1.19 | 1.24 | 1.07 | 1.20 | 0.98 | 1.04 | 28.72  | 4.72  |
| Q8BWZ3   | Isoform 2 of N-alpha-acetyltransferase 25, NatB auxiliary subunit OS=Mus musculus GN=Naa25 - [NAA25_MOUSE] | 1.81  | 2 | 1  | 1  | 2   | 1.30 | 1.28 | 0.98 | 1.48 | 1.13 | 1.20 | 0.92 | 1.19 | 0.91 | 1.11 | 0.85 | 1.39 | 1.07 | 107.45 | 6.24  |
| O08784   | Treacle protein OS=Mus musculus GN=Tcof1 PE=1 SV=1 - [TCOF_MOUSE]                                          | 16.67 | 5 | 17 | 17 | 47  | 1.00 | 0.92 | 0.94 | 1.03 | 1.03 | 1.04 | 1.06 | 1.19 | 1.24 | 1.16 | 1.22 | 1.01 | 1.00 | 134.92 | 9.35  |
| Q61324-2 | Isoform 2 of Aryl hydrocarbon receptor nuclear translocator 2 OS=Mus musculus GN=Amt2 - [ARNT2_MOUSE]      | 4.42  | 2 | 2  | 2  | 6   | 0.93 | 0.94 | 0.89 | 0.86 | 0.99 | 1.16 | 1.18 | 1.19 | 1.21 | 1.04 | 1.11 | 0.88 | 0.99 | 76.77  | 6.80  |
| D3YXK2   | Scaffold attachment factor B1 OS=Mus musculus GN=Safb PE=1 SV=2 - [SAFB1_MOUSE]                            | 29.03 | 1 | 20 | 28 | 113 | 1.04 | 1.01 | 1.00 | 1.04 | 0.99 | 1.17 | 1.08 | 1.19 | 1.07 | 1.10 | 1.05 | 1.04 | 0.99 | 105.04 | 5.35  |
| Q3TDN0   | Protein dispatched homolog 1 OS=Mus musculus GN=Disp1 PE=1 SV=2 - [DISP1_MOUSE]                            | 1.51  | 1 | 1  | 1  | 1   | 0.93 | 0.97 | 1.04 | 0.85 | 0.92 | 1.42 | 1.52 | 1.19 | 1.27 | 1.14 | 1.23 | 0.93 | 1.00 | 170.02 | 6.84  |
| Q80YX1-  | Isoform 2 of Tenascin OS=Mus musculus GN=Tnc - [TENA_MOUSE]                                                | 6.98  | 6 | 12 | 12 | 19  | 1.17 | 1.13 | 0.96 | 1.01 | 0.89 | 1.22 | 1.04 | 1.19 | 1.09 | 1.17 | 0.98 | 1.30 | 1.09 | 221.74 | 4.91  |
| Q06890   | Clusterin OS=Mus musculus GN=Clu PE=1 SV=1 - [CLUS_MOUSE]                                                  | 27.90 | 6 | 10 | 10 | 58  | 1.00 | 0.92 | 0.86 | 0.95 | 0.93 | 1.15 | 1.16 | 1.19 | 1.17 | 1.09 | 1.08 | 1.03 | 1.03 | 51.62  | 5.67  |
| Q8CC14   | APC membrane recruitment protein 2 OS=Mus musculus GN=Amer2 PE=1 SV=2 - [AMER2_MOUSE]                      | 34.52 | 1 | 6  | 14 | 47  | 0.98 | 1.12 | 1.24 | 0.90 | 0.92 | 1.13 | 1.26 | 1.19 | 1.14 | 1.14 | 1.15 | 1.06 | 1.04 | 69.89  | 6.64  |
| Q8VI36-2 | Isoform Alpha of Paxillin OS=Mus musculus GN=Pxn - [PAXI_MOUSE]                                            | 34.47 | 3 | 12 | 12 | 34  | 1.03 | 0.97 | 1.04 | 0.97 | 0.94 | 1.11 | 1.05 | 1.19 | 1.14 | 1.05 | 1.04 | 0.95 | 0.92 | 60.77  | 6.27  |
| Q542V3   | Serine/arginine-rich splicing factor 4 OS=Mus musculus GN=Srcf4 PE=2 SV=1 - [Q542V3_MOUSE]                 | 24.85 | 3 | 11 | 14 | 73  | 1.05 | 0.99 | 0.95 | 1.04 | 0.90 | 1.15 | 1.06 | 1.19 | 1.15 | 1.11 | 1.10 | 1.06 | 1.01 | 56.22  | 11.37 |
| B2RSU6   | Cingulin-like 1 OS=Mus musculus GN=Cgnl1 PE=2 SV=1 - [B2RSU6_MOUSE]                                        | 15.03 | 7 | 16 | 16 | 37  | 1.04 | 0.93 | 0.93 | 0.98 | 0.97 | 1.14 | 1.13 | 1.19 | 1.19 | 1.16 | 1.11 | 1.01 | 1.02 | 148.08 | 5.77  |
| Q8BGD8   | Cytochrome c oxidase assembly factor 6 homolog OS=Mus musculus GN=Coa6 PE=1 SV=1 - [COA6_MOUSE]            | 51.90 | 1 | 4  | 4  | 27  | 1.00 | 1.22 | 1.10 | 0.91 | 0.91 | 1.04 | 0.95 | 1.19 | 1.18 | 1.06 | 1.05 | 1.08 | 1.03 | 9.29   | 8.16  |

|          |                                                                                                  |       |    |    |    |     |      |      |      |      |      |      |      |      |      |      |      |      |      |        |      |
|----------|--------------------------------------------------------------------------------------------------|-------|----|----|----|-----|------|------|------|------|------|------|------|------|------|------|------|------|------|--------|------|
| Q60987   | Forkhead box protein G1 OS=Mus musculus GN=Foxg1 PE=2 SV=1 - [FOXG1_MOUSE]                       | 5.41  | 1  | 1  | 1  | 1   | 0.87 | 0.94 | 1.07 | 0.95 | 1.09 | 1.09 | 1.25 | 1.19 | 1.36 | 1.14 | 1.30 | 1.01 | 1.16 | 51.59  | 8.87 |
| Q8BUK6   | Protein Hook homolog 3 OS=Mus musculus GN=Hook3 PE=1 SV=2 - [HOOK3_MOUSE]                        | 41.78 | 2  | 24 | 24 | 93  | 0.99 | 0.90 | 0.90 | 0.90 | 0.86 | 1.17 | 1.15 | 1.19 | 1.20 | 1.09 | 1.10 | 1.04 | 1.00 | 83.17  | 5.19 |
| P70349   | Histidine triad nucleotide-binding protein 1 OS=Mus musculus GN=Hint1 PE=1 SV=3 - [HINT1_MOUSE]  | 77.78 | 2  | 7  | 7  | 102 | 0.98 | 0.82 | 0.85 | 0.92 | 0.95 | 1.16 | 1.15 | 1.19 | 1.18 | 1.12 | 1.16 | 1.05 | 1.06 | 13.77  | 6.87 |
| Q8K285   | FCH domain only protein 1 OS=Mus musculus GN=Fcho1 PE=1 SV=2 - [FCHO1_MOUSE]                     | 1.60  | 1  | 1  | 1  | 2   | 1.06 | 1.14 | 1.07 | 0.97 | 0.91 | 1.22 | 1.15 | 1.19 | 1.12 | 1.18 | 1.11 | 1.26 | 1.19 | 95.06  | 7.11 |
| Q60668-3 | Isoform 3 of Heterogeneous nuclear ribonucleoprotein D0 OS=Mus musculus GN=Hnrpd - [HNRPD_MOUSE] | 38.89 | 11 | 11 | 13 | 121 | 1.03 | 0.77 | 0.75 | 0.92 | 0.90 | 1.23 | 1.24 | 1.19 | 1.17 | 1.14 | 1.15 | 1.04 | 1.05 | 32.73  | 8.16 |
| J3QNW0   | Cytosine-specific methyltransferase OS=Mus musculus GN=Dnmt1 PE=3 SV=1 - [J3QNW0_MOUSE]          | 0.67  | 3  | 1  | 1  | 2   | 1.00 | 0.84 | 0.83 | 0.93 | 0.93 | 1.09 | 1.08 | 1.19 | 1.18 | 0.96 | 0.96 | 1.04 | 1.04 | 169.85 | 7.69 |
| Q8BR07-5 | Isoform 3 of Protein bicaudal D homolog 1 OS=Mus musculus GN=Bicd1 - [BICD1_MOUSE]               | 5.21  | 6  | 3  | 3  | 7   | 0.93 | 1.24 | 1.37 | 1.02 | 1.04 | 1.06 | 0.86 | 1.19 | 1.19 | 1.11 | 0.94 | 1.34 | 1.05 | 94.77  | 5.63 |
| A1BN54   | Alpha actinin 1a OS=Mus musculus GN=Actn1 PE=2 SV=1 - [A1BN54_MOUSE]                             | 65.05 | 1  | 2  | 54 | 316 | 1.00 | 1.14 | 1.16 | 1.05 | 1.04 | 1.06 | 1.07 | 1.19 | 1.27 | 0.96 | 1.00 | 1.11 | 1.16 | 102.66 | 5.48 |
| Q922Y1   | UBX domain-containing protein 1 OS=Mus musculus GN=Ubx1 PE=1 SV=1 - [UBXN1_MOUSE]                | 47.14 | 1  | 9  | 9  | 37  | 0.93 | 0.99 | 0.95 | 0.88 | 0.92 | 1.14 | 1.24 | 1.19 | 1.29 | 1.11 | 1.13 | 1.04 | 1.10 | 33.55  | 5.26 |
| O88207   | Collagen alpha-1(V) chain OS=Mus musculus GN=Col5a1 PE=2 SV=2 - [COSA1_MOUSE]                    | 2.83  | 1  | 2  | 2  | 3   | 2.05 | 1.63 | 0.79 | 1.03 | 0.85 | 1.18 | 0.57 | 1.19 | 0.75 | 1.23 | 0.63 | 1.36 | 0.67 | 183.56 | 4.98 |
| P58871   | 182 kDa tankyrase-1-binding protein OS=Mus musculus GN=Tnks1bp1 PE=1 SV=2 - [TB182_MOUSE]        | 55.64 | 1  | 64 | 64 | 279 | 1.01 | 1.03 | 1.02 | 0.96 | 0.95 | 1.17 | 1.18 | 1.19 | 1.20 | 1.10 | 1.08 | 0.99 | 0.98 | 181.71 | 4.88 |
| Q9JLM8   | Serine/threonine-protein kinase DCLK1 OS=Mus musculus GN=Dclk1 PE=1 SV=1 - [DCLK1_MOUSE]         | 41.27 | 1  | 3  | 25 | 119 | 1.14 | 1.24 | 1.34 | 1.06 | 1.04 | 0.95 | 0.97 | 1.19 | 1.11 | 1.06 | 1.10 | 1.07 | 0.99 | 84.10  | 8.87 |

|          |                                                                                               |       |   |    |    |     |      |      |      |      |      |      |      |      |      |      |      |      |      |        |       |
|----------|-----------------------------------------------------------------------------------------------|-------|---|----|----|-----|------|------|------|------|------|------|------|------|------|------|------|------|------|--------|-------|
| Q6ZWZ7   | 60S ribosomal protein L17 OS=Mus musculus GN=Rpl17 PE=2 SV=1 - [Q6ZWZ7_MOUSE]                 | 30.98 | 3 | 4  | 5  | 34  | 1.12 | 0.82 | 0.71 | 0.96 | 0.91 | 1.18 | 1.04 | 1.19 | 1.10 | 1.03 | 0.94 | 1.09 | 0.94 | 21.38  | 10.18 |
| Q9QYK7   | RING finger protein 11 OS=Mus musculus GN=Rnf11 PE=1 SV=1 - [RNF11_MOUSE]                     | 13.64 | 1 | 2  | 2  | 8   | 1.05 | 1.10 | 1.05 | 0.97 | 0.90 | 1.11 | 1.02 | 1.19 | 1.11 | 1.08 | 1.03 | 1.18 | 1.11 | 17.45  | 4.78  |
| Q8VHY0   | Chondroitin sulfate proteoglycan 4 OS=Mus musculus GN=Cspg4 PE=1 SV=3 - [CSPG4_MOUSE]         | 8.98  | 3 | 13 | 13 | 21  | 0.96 | 1.09 | 1.17 | 1.00 | 1.02 | 1.03 | 1.01 | 1.19 | 1.16 | 1.08 | 1.15 | 1.10 | 1.11 | 252.15 | 5.44  |
| Q05816   | Fatty acid-binding protein, epidermal OS=Mus musculus GN=Fabp5 PE=1 SV=3 - [FABP5_MOUSE]      | 72.59 | 1 | 8  | 8  | 165 | 0.97 | 0.89 | 0.94 | 0.92 | 0.94 | 1.19 | 1.21 | 1.19 | 1.22 | 1.09 | 1.13 | 1.08 | 1.08 | 15.13  | 6.54  |
| Q8R048   | C-Myc-binding protein OS=Mus musculus GN=Mycbp PE=4 SV=1 - [Q8R048_MOUSE]                     | 62.14 | 3 | 5  | 5  | 14  | 1.04 | 0.79 | 0.82 | 0.84 | 0.88 | 1.18 | 1.05 | 1.19 | 1.15 | 0.98 | 0.95 | 0.92 | 0.89 | 11.96  | 5.91  |
| P70296   | Phosphatidylethanolamine-binding protein 1 OS=Mus musculus GN=Pebp1 PE=1 SV=3 - [PEBP1_MOUSE] | 75.94 | 6 | 10 | 10 | 563 | 0.97 | 0.87 | 0.93 | 0.88 | 0.90 | 1.12 | 1.14 | 1.19 | 1.19 | 1.08 | 1.12 | 1.04 | 1.10 | 20.82  | 5.40  |
| Q9Z1M8   | Protein Red OS=Mus musculus GN=Ik PE=2 SV=2 - [RED_MOUSE]                                     | 30.16 | 1 | 14 | 14 | 20  | 0.99 | 0.87 | 1.01 | 1.00 | 0.94 | 1.15 | 1.09 | 1.19 | 1.13 | 1.08 | 1.08 | 1.12 | 1.14 | 65.58  | 6.64  |
| Q61733   | 28S ribosomal protein S31, mitochondrial OS=Mus musculus GN=Mmps31 PE=2 SV=1 - [RT31_MOUSE]   | 29.43 | 1 | 8  | 9  | 14  | 0.92 | 0.97 | 1.00 | 0.88 | 0.91 | 1.16 | 1.27 | 1.19 | 1.42 | 1.03 | 1.15 | 0.89 | 1.15 | 43.85  | 8.51  |
| Q8BL65-4 | Isoform 4 of Actin-binding LIM protein 2 OS=Mus musculus GN=Ablim2 - [ABLM2_MOUSE]            | 54.62 | 8 | 2  | 26 | 206 | 0.94 | 1.05 | 0.95 | 0.94 | 0.98 | 1.23 | 1.27 | 1.19 | 1.22 | 1.08 | 1.08 | 0.96 | 1.12 | 68.61  | 8.07  |
| Q80Y56   | Rabenosyn-5 OS=Mus musculus GN=Zfyve20 PE=2 SV=1 - [RBNS5_MOUSE]                              | 10.73 | 2 | 6  | 6  | 13  | 1.08 | 0.95 | 0.90 | 0.98 | 0.91 | 1.21 | 1.14 | 1.19 | 1.10 | 1.18 | 1.11 | 1.18 | 1.10 | 88.44  | 5.30  |
| E9Q8P8   | Protein FAM131B OS=Mus musculus GN=Fam131b PE=2 SV=1 - [E9Q8P8_MOUSE]                         | 39.17 | 3 | 14 | 14 | 75  | 0.95 | 1.01 | 1.04 | 0.98 | 1.03 | 1.18 | 1.21 | 1.19 | 1.22 | 1.06 | 1.10 | 1.00 | 1.05 | 38.93  | 4.48  |
| Q8CH18-5 | Isoform 5 of E1A-binding protein p400 OS=Mus musculus GN=Ep400 - [EP400_MOUSE]                | 0.62  | 5 | 1  | 2  | 3   | 0.86 | 1.12 | 1.30 | 0.88 | 1.03 | 0.98 | 1.14 | 1.19 | 1.38 | 1.17 | 1.37 | 1.27 | 1.48 | 318.04 | 9.11  |



|          |                                                                                                      |       |   |    |    |     |      |      |      |      |      |      |      |      |      |      |      |      |      |        |      |
|----------|------------------------------------------------------------------------------------------------------|-------|---|----|----|-----|------|------|------|------|------|------|------|------|------|------|------|------|------|--------|------|
| Q9D074   | E3 ubiquitin-protein ligase MGRN1 OS=Mus musculus GN=Mgm1 PE=1 SV=2 - [MGRN1_MOUSE]                  | 1.50  | 5 | 1  | 1  | 2   | 1.04 | 1.24 | 1.19 | 1.03 | 0.99 | 1.22 | 1.17 | 1.19 | 1.14 | 1.03 | 1.00 | 0.97 | 0.94 | 58.44  | 4.88 |
| Q8VEJ4   | Notchless protein homolog 1 OS=Mus musculus GN=Nle1 PE=2 SV=4 - [NLE1_MOUSE]                         | 11.34 | 1 | 3  | 3  | 6   | 1.07 | 0.94 | 0.88 | 0.94 | 0.88 | 1.07 | 1.02 | 1.19 | 1.10 | 0.96 | 0.90 | 0.92 | 0.85 | 53.10  | 7.17 |
| P16045   | Galectin-1 OS=Mus musculus GN=Lgals1 PE=1 SV=3 - [LEGI1_MOUSE]                                       | 57.04 | 1 | 7  | 7  | 64  | 1.00 | 0.81 | 0.83 | 0.93 | 0.90 | 1.22 | 1.17 | 1.19 | 1.20 | 1.06 | 1.05 | 0.99 | 0.93 | 14.86  | 5.49 |
| P70365-4 | Isoform 4 of Nuclear receptor coactivator 1 OS=Mus musculus GN=Ncoa1 - [NCOA1_MOUSE]                 | 7.07  | 4 | 7  | 7  | 12  | 0.90 | 0.89 | 1.01 | 0.93 | 1.03 | 1.23 | 1.21 | 1.19 | 1.19 | 1.11 | 1.23 | 1.03 | 1.08 | 144.67 | 6.24 |
| Q9WV92   | Isoform 8 of Band 4.1-like protein 3 OS=Mus musculus GN=Epb4113 - [E41L3_MOUSE]                      | 48.29 | 1 | 1  | 41 | 288 | 1.17 | 1.34 | 1.15 | 1.08 | 0.92 | 1.09 | 0.93 | 1.19 | 1.02 | 1.13 | 0.97 | 0.94 | 0.81 | 116.71 | 5.22 |
| Q62048   | Astrocytic phosphoprotein PEA-15 OS=Mus musculus GN=Pea15 PE=1 SV=1 - [PEA15_MOUSE]                  | 63.08 | 2 | 10 | 10 | 269 | 1.23 | 0.93 | 0.76 | 0.98 | 0.79 | 1.24 | 0.98 | 1.19 | 0.94 | 1.12 | 0.90 | 1.11 | 0.95 | 15.04  | 5.02 |
| Q78TU8   | Family with sequence similarity 107, member A OS=Mus musculus GN=Fam107a PE=2 SV=1 - [Q78TU8_MOUSE]  | 46.53 | 4 | 7  | 8  | 35  | 1.14 | 0.92 | 0.86 | 0.93 | 0.83 | 1.25 | 1.06 | 1.19 | 1.04 | 1.04 | 0.91 | 1.05 | 0.86 | 17.50  | 9.74 |
| B7ZC12   | Nebulette OS=Mus musculus GN=Nebi PE=2 SV=1 - [B7ZC12_MOUSE]                                         | 12.82 | 8 | 1  | 11 | 101 | 0.82 | 0.95 | 1.15 | 0.96 | 1.17 | 1.00 | 1.20 | 1.19 | 1.44 | 1.09 | 1.32 | 0.94 | 1.14 | 115.94 | 8.51 |
| D3Y50    | Copper homeostasis protein cutC homolog (Fragment) OS=Mus musculus GN=Cutc PE=2 SV=1 - [D3Y50_MOUSE] | 4.72  | 3 | 1  | 1  | 2   | 0.99 | 1.06 | 1.07 | 1.05 | 1.07 | 1.15 | 1.16 | 1.19 | 1.20 | 1.12 | 1.13 | 1.13 | 1.15 | 27.14  | 6.68 |
| Q9WU63   | Heme-binding protein 2 OS=Mus musculus GN=Hebp2 PE=1 SV=1 - [HEBP2_MOUSE]                            | 7.32  | 1 | 1  | 1  | 2   | 1.03 | 0.94 | 0.91 | 0.86 | 0.83 | 1.20 | 1.16 | 1.19 | 1.15 | 0.93 | 0.90 | 1.06 | 1.02 | 23.05  | 4.48 |
| Q8CHY6   | Transcriptional repressor p66 alpha OS=Mus musculus GN=Gatad2a PE=1 SV=2 - [P66A_MOUSE]              | 6.04  | 2 | 2  | 2  | 4   | 0.88 | 0.80 | 0.90 | 0.87 | 0.98 | 1.03 | 1.16 | 1.19 | 1.34 | 0.99 | 1.12 | 0.89 | 1.00 | 67.29  | 9.89 |
| Q8R1H0   | Homeodomain-only protein OS=Mus musculus GN=Hopx PE=1 SV=1 - [HOP_MOUSE]                             | 49.32 | 1 | 4  | 4  | 9   | 0.98 | 1.20 | 1.20 | 1.00 | 1.02 | 1.20 | 1.19 | 1.19 | 1.05 | 1.11 | 1.19 | 1.13 | 1.10 | 8.28   | 4.88 |

|          |                                                                                                       |       |   |    |    |     |      |      |      |      |      |      |      |      |      |      |      |      |      |        |       |
|----------|-------------------------------------------------------------------------------------------------------|-------|---|----|----|-----|------|------|------|------|------|------|------|------|------|------|------|------|------|--------|-------|
| E0CXA0   | Hepatoma-derived growth factor (Fragment) OS=Mus musculus GN=Hdgf PE=2 SV=1 - [E0CXA0_MOUSE]          | 82.67 | 2 | 1  | 15 | 122 | 0.94 | 1.11 | 1.14 | 1.08 | 1.11 | 1.31 | 1.21 | 1.19 | 1.20 | 1.26 | 1.13 | 0.93 | 0.93 | 22.10  | 4.67  |
| G3UZK2   | Ubiquitin-conjugating enzyme E2 G2 (Fragment) OS=Mus musculus GN=Ubc2g2 PE=2 SV=1 - [G3UZK2_MOUSE]    | 12.68 | 2 | 1  | 1  | 1   | 0.90 | 0.72 | 0.79 | 0.99 | 1.09 | 1.20 | 1.32 | 1.19 | 1.32 | 1.15 | 1.27 | 1.10 | 1.22 | 7.79   | 4.50  |
| A2AA86   | SUZ domain-containing protein 1 OS=Mus musculus GN=Szrd1 PE=2 SV=1 - [A2AA86_MOUSE]                   | 66.67 | 4 | 7  | 7  | 23  | 1.02 | 0.86 | 0.85 | 0.97 | 0.92 | 1.17 | 1.10 | 1.19 | 1.20 | 1.13 | 1.06 | 0.98 | 1.02 | 14.62  | 11.46 |
| Q8VE11   | Myotubularin-related protein 6 OS=Mus musculus GN=Mtmr6 PE=1 SV=1 - [MTMR6_MOUSE]                     | 2.27  | 1 | 1  | 1  | 2   | 1.06 | 1.18 | 1.12 | 1.02 | 0.97 | 1.01 | 0.96 | 1.19 | 1.12 | 1.09 | 1.03 | 1.05 | 0.99 | 70.89  | 7.83  |
| A3KGF9   | Uncharacterized protein C1Sor52 homolog OS=Mus musculus PE=1 SV=1 - [CO052_MOUSE]                     | 3.67  | 2 | 1  | 2  | 2   | 1.09 | 0.99 | 0.91 | 0.97 | 0.88 | 1.08 | 0.98 | 1.19 | 1.09 | 1.06 | 0.97 | 1.10 | 1.00 | 58.65  | 9.55  |
| Q8CJ69   | BMP-binding endothelial regulator protein OS=Mus musculus GN=Bmper PE=1 SV=1 - [BMPEP_MOUSE]          | 1.90  | 1 | 1  | 1  | 2   | 0.90 | 0.82 | 0.91 | 1.05 | 1.16 | 0.97 | 1.07 | 1.19 | 1.32 | 1.09 | 1.21 | 0.97 | 1.08 | 76.10  | 7.80  |
| Q61624   | Zinc finger protein 148 OS=Mus musculus GN=Znf148 PE=1 SV=2 - [ZN148_MOUSE]                           | 25.82 | 1 | 13 | 13 | 32  | 1.04 | 0.96 | 0.96 | 0.96 | 0.96 | 1.21 | 1.19 | 1.19 | 1.15 | 1.10 | 1.04 | 1.02 | 1.03 | 88.70  | 6.48  |
| Q69ZZ6-2 | Isoform 2 of Transmembrane and coiled-coil domains protein 1 OS=Mus musculus GN=Tmcc1 - [TMCC1_MOUSE] | 15.19 | 6 | 5  | 6  | 14  | 1.08 | 0.97 | 0.88 | 1.16 | 1.06 | 1.12 | 1.11 | 1.19 | 1.10 | 1.15 | 1.06 | 1.06 | 1.11 | 52.89  | 7.06  |
| B7ZMZ7   | Dip2c protein OS=Mus musculus GN=Dip2c PE=2 SV=1 - [B7ZMZ7_MOUSE]                                     | 13.69 | 1 | 1  | 15 | 33  | 0.91 | 1.17 | 1.28 | 0.93 | 1.02 | 1.10 | 1.20 | 1.19 | 1.31 | 1.13 | 1.25 | 1.01 | 1.11 | 167.14 | 7.44  |
| Q05D13   | Stathmin OS=Mus musculus GN=Stmn4 PE=2 SV=1 - [Q05D13_MOUSE]                                          | 21.02 | 4 | 4  | 4  | 6   | 1.00 | 1.02 | 0.89 | 0.95 | 0.94 | 1.26 | 1.24 | 1.19 | 1.19 | 1.18 | 1.24 | 0.99 | 0.98 | 20.42  | 5.73  |
| F8VQ93   | PH-interacting protein OS=Mus musculus GN=Phip PE=4 SV=1 - [F8VQ93_MOUSE]                             | 0.71  | 2 | 1  | 1  | 2   | 1.04 | 1.27 | 1.21 | 1.35 | 1.29 | 1.08 | 1.03 | 1.19 | 1.14 | 1.14 | 1.09 | 1.38 | 1.33 | 206.60 | 8.85  |

|          |                                                                                                                 |       |   |    |    |     |      |      |      |      |      |      |      |      |      |      |      |      |      |        |      |
|----------|-----------------------------------------------------------------------------------------------------------------|-------|---|----|----|-----|------|------|------|------|------|------|------|------|------|------|------|------|------|--------|------|
| B2RUR8   | OTU domain-containing protein 7B<br>OS=Mus musculus<br>GN=Otud7b PE=1<br>SV=1 -<br>[OTU7B_MOUSE]                | 11.19 | 3 | 4  | 6  | 11  | 0.80 | 1.08 | 1.35 | 0.97 | 1.10 | 1.06 | 1.34 | 1.19 | 1.53 | 0.96 | 1.40 | 1.15 | 1.13 | 91.93  | 6.86 |
| Q9R207   | Nibrin OS=Mus musculus<br>GN=Nbn PE=1<br>SV=1 -<br>[NBN_MOUSE]                                                  | 1.07  | 1 | 1  | 1  | 1   | 0.96 | 0.93 | 0.97 | 1.28 | 1.33 | 0.88 | 0.91 | 1.19 | 1.24 | 0.85 | 0.88 | 1.07 | 1.12 | 83.74  | 6.68 |
| Q5TLH4   | Protein PRC2C OS=Mus musculus<br>GN=Prc2c PE=1<br>SV=3 -<br>[PRC2C_MOUSE]                                       | 22.21 | 2 | 48 | 49 | 149 | 1.08 | 0.93 | 0.89 | 1.01 | 0.93 | 1.18 | 1.10 | 1.19 | 1.10 | 1.14 | 1.04 | 1.02 | 0.96 | 310.70 | 9.10 |
| B1AVN9   | Protein Phactr2 OS=Mus musculus<br>GN=Phactr2 PE=2<br>SV=1 -<br>[B1AVN9_MOUSE]                                  | 15.54 | 5 | 6  | 7  | 27  | 1.24 | 1.23 | 0.96 | 0.94 | 0.80 | 1.24 | 1.01 | 1.19 | 0.94 | 1.26 | 1.01 | 1.20 | 1.04 | 61.73  | 5.69 |
| Q6PIH6-4 | Isoform 4 of Ankyrin repeat and LEM domain-containing protein 2 OS=Mus musculus<br>GN=Ankle2 -<br>[ANKL2_MOUSE] | 9.22  | 4 | 3  | 3  | 6   | 0.93 | 1.14 | 1.16 | 1.08 | 1.07 | 1.10 | 1.10 | 1.19 | 1.15 | 1.18 | 1.08 | 1.33 | 1.15 | 46.88  | 7.65 |
| Q3V3R4   | Integrin alpha-1 OS=Mus musculus<br>GN=Itga1 PE=2 SV=2 -<br>[ITA1_MOUSE]                                        | 1.78  | 1 | 2  | 2  | 3   | 1.14 | 1.13 | 0.99 | 1.24 | 1.09 | 1.25 | 1.08 | 1.19 | 1.04 | 1.23 | 1.08 | 1.21 | 1.06 | 130.73 | 6.20 |
| P55194   | SH3 domain-binding protein 1 OS=Mus musculus<br>GN=Sh3bp1 PE=1<br>SV=2 -<br>[3BP1_MOUSE]                        | 7.99  | 4 | 3  | 3  | 5   | 0.79 | 0.76 | 1.03 | 0.89 | 1.21 | 0.90 | 1.00 | 1.19 | 1.62 | 1.01 | 1.37 | 0.88 | 1.20 | 65.24  | 5.68 |
| Q99LU0   | Charged multivesicular body protein 1b-1 OS=Mus musculus<br>GN=Chmp1b1 PE=1<br>SV=1 -<br>[CH1B1_MOUSE]          | 12.06 | 2 | 3  | 3  | 6   | 1.05 | 0.95 | 0.92 | 0.97 | 0.93 | 1.08 | 1.07 | 1.19 | 1.16 | 1.05 | 1.02 | 1.16 | 1.11 | 22.11  | 8.10 |
| P61759   | Prefoldin subunit 3 OS=Mus musculus<br>GN=Vbp1 PE=2 SV=2 -<br>[PFD3_MOUSE]                                      | 54.59 | 8 | 11 | 11 | 53  | 1.05 | 0.97 | 0.93 | 0.91 | 0.87 | 1.22 | 1.14 | 1.19 | 1.20 | 1.09 | 1.09 | 1.02 | 1.04 | 22.42  | 6.28 |
| D3YYI8   | Histone deacetylase OS=Mus musculus<br>GN=Gm10093 PE=3<br>SV=1 -<br>[D3YYI8_MOUSE]                              | 14.52 | 2 | 1  | 4  | 11  | 1.12 | 0.92 | 0.82 | 0.99 | 0.88 | 1.36 | 1.20 | 1.19 | 1.06 | 1.33 | 1.19 | 1.10 | 0.98 | 55.01  | 5.43 |
| P28738   | Kinesin heavy chain isoform 5C OS=Mus musculus<br>GN=Kif5c PE=1<br>SV=3 -<br>[KIF5C_MOUSE]                      | 45.40 | 3 | 29 | 40 | 109 | 0.99 | 0.90 | 0.88 | 0.99 | 0.99 | 1.14 | 1.21 | 1.19 | 1.25 | 1.07 | 1.14 | 0.94 | 1.00 | 109.21 | 6.19 |
| P0CW02   | Lymphocyte antigen 6C1 OS=Mus musculus<br>GN=Ly6c1 PE=2<br>SV=1 -<br>[LY6C1_MOUSE]                              | 13.74 | 1 | 1  | 1  | 2   | 0.81 | 1.30 | 1.59 | 1.03 | 1.26 | 0.96 | 1.17 | 1.19 | 1.46 | 1.19 | 1.46 | 1.41 | 1.74 | 14.18  | 6.01 |
| Q3UJB0   | Protein Sf3b2 OS=Mus musculus<br>GN=Sf3b2 PE=2<br>SV=1 -<br>[Q3UJB0_MOUSE]                                      | 35.54 | 1 | 22 | 22 | 63  | 0.99 | 0.99 | 0.99 | 1.00 | 1.00 | 1.16 | 1.17 | 1.19 | 1.21 | 1.18 | 1.20 | 1.13 | 1.12 | 98.14  | 5.62 |

|          |                                                                                                   |       |   |     |     |      |      |      |      |      |      |      |      |      |      |      |      |      |      |        |      |
|----------|---------------------------------------------------------------------------------------------------|-------|---|-----|-----|------|------|------|------|------|------|------|------|------|------|------|------|------|------|--------|------|
| P16332   | Methylmalonyl-CoA mutase, mitochondrial OS=Mus musculus GN=Mut PE=2 SV=2 - [MUTA_MOUSE]           | 21.39 | 1 | 12  | 12  | 26   | 0.95 | 1.06 | 1.05 | 1.22 | 1.29 | 1.07 | 1.00 | 1.20 | 1.04 | 1.24 | 1.26 | 1.28 | 1.30 | 82.79  | 6.89 |
| A2AWS5   | Histone deacetylase 5 OS=Mus musculus GN=Hdac5 PE=2 SV=1 - [A2AWS5_MOUSE]                         | 6.89  | 7 | 5   | 5   | 8    | 1.02 | 1.13 | 1.01 | 0.98 | 0.89 | 1.21 | 1.07 | 1.20 | 1.06 | 1.17 | 0.97 | 1.31 | 1.06 | 111.39 | 5.72 |
| Q9QYR6   | Microtubule-associated protein 1A OS=Mus musculus GN=Map1a PE=1 SV=2 - [MAP1A_MOUSE]              | 58.29 | 3 | 132 | 133 | 1754 | 1.01 | 0.92 | 0.94 | 0.95 | 0.95 | 1.21 | 1.20 | 1.20 | 1.17 | 1.08 | 1.09 | 1.01 | 1.02 | 299.96 | 5.00 |
| Q6P2L6-4 | Isoform 4 of Histone-lysine N-methyltransferase NSD3 OS=Mus musculus GN=Whsc111 - [NSD3_MOUSE]    | 2.42  | 5 | 1   | 1   | 2    | 1.27 | 1.12 | 0.88 | 1.06 | 0.84 | 1.16 | 0.91 | 1.20 | 0.94 | 1.34 | 1.05 | 1.18 | 0.93 | 69.96  | 9.17 |
| Q9D1Q4   | Dolichol-phosphate mannosyltransferase subunit 3 OS=Mus musculus GN=Dpm3 PE=3 SV=1 - [DPM3_MOUSE] | 10.87 | 1 | 1   | 1   | 1    | 0.80 | 1.43 | 1.77 | 0.89 | 1.10 | 1.02 | 1.25 | 1.20 | 1.48 | 1.43 | 1.78 | 0.59 | 0.73 | 10.13  | 7.08 |
| Q80U72   | Protein scribble homolog OS=Mus musculus GN=Scrib PE=1 SV=2 - [SCRIB_MOUSE]                       | 4.53  | 7 | 5   | 5   | 8    | 1.11 | 1.28 | 1.15 | 1.03 | 0.91 | 1.12 | 1.01 | 1.20 | 1.03 | 1.19 | 1.06 | 1.10 | 0.99 | 173.95 | 5.12 |
| Q9CR41   | Huntingtin-interacting protein K OS=Mus musculus GN=Hypk PE=2 SV=2 - [HYPK_MOUSE]                 | 24.81 | 2 | 2   | 2   | 17   | 1.08 | 0.84 | 0.74 | 0.91 | 0.85 | 1.14 | 1.08 | 1.20 | 1.10 | 1.12 | 1.04 | 0.95 | 0.92 | 14.67  | 4.93 |
| Q8R1S4-2 | Isoform 2 of Metastasis suppressor protein 1 OS=Mus musculus GN=Mtss1 - [MTSS1_MOUSE]             | 3.46  | 3 | 1   | 1   | 4    | 1.03 | 1.06 | 1.03 | 1.07 | 1.04 | 1.11 | 1.07 | 1.20 | 1.16 | 1.22 | 1.19 | 1.36 | 1.32 | 78.78  | 7.15 |
| E0CY16   | Cell adhesion molecule 1 OS=Mus musculus GN=Cadm1 PE=2 SV=1 - [E0CY16_MOUSE]                      | 45.90 | 2 | 1   | 13  | 170  | 1.15 | 0.92 | 0.80 | 1.05 | 0.91 | 1.42 | 1.23 | 1.20 | 1.04 | 1.11 | 0.96 | 1.19 | 1.04 | 42.86  | 5.72 |
| Q9QXD8   | LIM domain-containing protein 1 OS=Mus musculus GN=Limd1 PE=1 SV=2 - [LIMD1_MOUSE]                | 15.87 | 1 | 6   | 6   | 10   | 0.99 | 0.88 | 0.82 | 0.87 | 0.94 | 1.16 | 1.19 | 1.20 | 1.29 | 1.15 | 1.12 | 0.96 | 1.03 | 71.38  | 6.32 |
| Q8CDA1   | Phosphatidylinositolid phosphatase SAC2 OS=Mus musculus GN=Inpp5f PE=1 SV=1 - [SAC2_MOUSE]        | 7.77  | 4 | 8   | 8   | 11   | 1.08 | 1.21 | 1.14 | 1.07 | 1.02 | 1.15 | 1.08 | 1.20 | 1.07 | 1.24 | 1.16 | 1.24 | 1.20 | 127.53 | 7.11 |
| Q91WV0   | Protein Dr1 OS=Mus musculus GN=Dr1 PE=2 SV=1 - [NC2B_MOUSE]                                       | 15.91 | 1 | 3   | 3   | 6    | 1.00 | 1.04 | 1.03 | 0.93 | 0.92 | 1.02 | 1.01 | 1.20 | 1.18 | 1.04 | 1.03 | 1.06 | 1.06 | 19.42  | 4.75 |

|        |                                                                                                                                        |       |    |    |    |     |      |      |      |      |      |      |      |      |      |      |      |      |      |        |       |
|--------|----------------------------------------------------------------------------------------------------------------------------------------|-------|----|----|----|-----|------|------|------|------|------|------|------|------|------|------|------|------|------|--------|-------|
| Q9WV69 | Isoform 2 of Dematin<br>OS=Mus musculus<br>GN=Dmtn -<br>[DEMA_MOUSE]                                                                   | 66.58 | 2  | 1  | 19 | 282 | 1.34 | 1.77 | 1.68 | 1.27 | 0.95 | 1.24 | 0.95 | 1.20 | 0.89 | 1.42 | 0.92 | 1.24 | 0.93 | 43.02  | 8.28  |
| Q62419 | Endophilin-A2<br>OS=Mus musculus<br>GN=Sh3g11 PE=1<br>SV=1 -<br>[SH3G1_MOUSE]                                                          | 65.49 | 1  | 17 | 24 | 113 | 0.96 | 0.92 | 0.99 | 0.89 | 0.97 | 1.18 | 1.23 | 1.20 | 1.26 | 1.03 | 1.11 | 0.98 | 1.00 | 41.49  | 5.72  |
| Q8VEA4 | Mitochondrial<br>intermembrane space<br>import and assembly<br>protein 40 OS=Mus<br>musculus GN=Chchd4<br>PE=1 SV=1 -<br>[MIA40_MOUSE] | 42.45 | 1  | 4  | 4  | 22  | 1.04 | 0.94 | 0.89 | 0.91 | 0.93 | 1.14 | 1.13 | 1.20 | 1.19 | 1.14 | 1.06 | 1.03 | 1.02 | 15.51  | 4.32  |
| E9QLD2 | Myelin transcription<br>factor 1-like protein<br>OS=Mus musculus<br>GN=Myt11 PE=2<br>SV=1 -<br>[E9QLD2_MOUSE]                          | 12.15 | 11 | 11 | 12 | 24  | 1.01 | 0.93 | 0.85 | 0.98 | 0.94 | 1.23 | 1.19 | 1.20 | 1.16 | 1.08 | 1.07 | 1.05 | 0.97 | 132.68 | 4.93  |
| F60761 | Neurogranin OS=Mus<br>musculus GN=Nrgn<br>PE=1 SV=1 -<br>[NEUG_MOUSE]                                                                  | 87.18 | 1  | 6  | 6  | 110 | 1.02 | 0.84 | 0.79 | 0.88 | 0.86 | 1.20 | 1.17 | 1.20 | 1.17 | 1.03 | 0.98 | 0.87 | 0.83 | 7.49   | 7.05  |
| Q6PDM2 | Serine/arginine-rich<br>splicing factor 1<br>OS=Mus musculus<br>GN=Srsf1 PE=1 SV=3<br>[SRSF1_MOUSE]                                    | 53.23 | 6  | 16 | 16 | 138 | 1.01 | 0.98 | 0.95 | 0.95 | 0.93 | 1.16 | 1.14 | 1.20 | 1.18 | 1.07 | 1.04 | 1.01 | 0.99 | 27.73  | 10.36 |
| Q80YN3 | Breast carcinoma-<br>amplified sequence 1<br>homolog OS=Mus<br>musculus GN=Bcas1<br>PE=1 SV=3 -<br>[BCAS1_MOUSE]                       | 46.92 | 4  | 23 | 23 | 133 | 0.96 | 0.95 | 1.01 | 0.91 | 0.92 | 1.19 | 1.23 | 1.20 | 1.21 | 1.09 | 1.12 | 1.03 | 1.08 | 67.34  | 6.21  |
| Q8C4Y1 | Max protein OS=Mus<br>musculus GN=Max<br>PE=2 SV=1 -<br>[Q8C4Y1_MOUSE]                                                                 | 33.11 | 3  | 4  | 4  | 10  | 1.01 | 1.08 | 0.99 | 0.90 | 0.92 | 1.12 | 1.05 | 1.20 | 1.10 | 1.17 | 1.04 | 1.06 | 1.03 | 17.16  | 6.55  |
| Q5SQY2 | Biorientation of<br>chromosomes in cell<br>division protein 1<br>OS=Mus musculus<br>GN=Bod1 PE=2 SV=1<br>- [BOD1_MOUSE]                | 54.34 | 1  | 5  | 7  | 17  | 1.05 | 1.05 | 1.02 | 0.93 | 0.96 | 1.10 | 1.11 | 1.20 | 1.09 | 1.07 | 1.01 | 1.05 | 0.98 | 18.35  | 5.90  |
| Q3TQ29 | Pumilio homolog 2<br>OS=Mus musculus<br>GN=Pum2 PE=2 SV=1<br>- [Q3TQ29_MOUSE]                                                          | 4.08  | 10 | 3  | 4  | 8   | 1.03 | 1.22 | 1.19 | 1.07 | 1.02 | 1.18 | 1.15 | 1.20 | 1.17 | 1.12 | 1.12 | 1.14 | 1.03 | 105.57 | 6.86  |
| Q9CR51 | V-type proton ATPase<br>subunit G 1 OS=Mus<br>musculus<br>GN=Atp6v1g1 PE=2<br>SV=3 -<br>[VATG1_MOUSE]                                  | 53.39 | 1  | 4  | 4  | 33  | 1.13 | 1.07 | 0.98 | 0.90 | 0.80 | 1.20 | 1.04 | 1.20 | 1.06 | 1.06 | 0.96 | 1.08 | 0.93 | 13.72  | 7.97  |
| Q61937 | Nucleophosmin<br>OS=Mus musculus<br>GN=Npm1 PE=1<br>SV=1 -<br>[NPM_MOUSE]                                                              | 68.84 | 5  | 15 | 15 | 217 | 1.04 | 1.03 | 0.99 | 0.96 | 0.92 | 1.20 | 1.14 | 1.20 | 1.13 | 1.14 | 1.06 | 1.09 | 1.02 | 32.54  | 4.77  |

|        |                                                                                                         |       |   |    |    |     |      |      |      |      |      |      |      |      |      |      |      |      |      |        |       |
|--------|---------------------------------------------------------------------------------------------------------|-------|---|----|----|-----|------|------|------|------|------|------|------|------|------|------|------|------|------|--------|-------|
| O70274 | Protein tyrosine phosphatase type IVA 2 OS=Mus musculus GN=Ptp4a2 PE=1 SV=1 - [TP4A2_MOUSE]             | 17.37 | 2 | 3  | 3  | 4   | 1.18 | 1.55 | 1.14 | 1.21 | 0.92 | 0.99 | 0.72 | 1.20 | 0.91 | 1.08 | 0.95 | 1.11 | 0.91 | 19.11  | 8.37  |
| E9PYN2 | Zinc finger protein 346 OS=Mus musculus GN=Zfp346 PE=2 SV=1 - [E9PYN2_MOUSE]                            | 10.31 | 9 | 2  | 2  | 4   | 1.05 | 0.97 | 0.92 | 1.05 | 1.00 | 1.17 | 1.11 | 1.20 | 1.14 | 1.21 | 1.16 | 1.26 | 1.20 | 29.00  | 8.44  |
| Q9D4H4 | Isoform 2 of Angiotensin-like protein 1 OS=Mus musculus GN=Amotl1 - [AMOL1_MOUSE]                       | 4.42  | 2 | 2  | 4  | 12  | 1.15 | 0.85 | 0.73 | 0.94 | 0.83 | 1.19 | 1.00 | 1.20 | 1.02 | 1.21 | 1.03 | 1.08 | 0.93 | 98.36  | 7.37  |
| E9QK34 | Neuroigin-1 OS=Mus musculus GN=Nlgn1 PE=2 SV=1 - [E9QK34_MOUSE]                                         | 10.32 | 3 | 4  | 7  | 17  | 1.06 | 1.04 | 0.98 | 1.12 | 1.08 | 1.05 | 1.01 | 1.20 | 0.99 | 1.07 | 0.96 | 1.10 | 1.03 | 90.95  | 6.10  |
| Q6PAM1 | Alpha-taxilin OS=Mus musculus GN=Txlna PE=2 SV=1 - [TXLNA_MOUSE]                                        | 22.02 | 6 | 12 | 12 | 26  | 1.06 | 0.95 | 0.85 | 1.01 | 0.96 | 1.18 | 1.11 | 1.20 | 1.16 | 1.06 | 1.02 | 1.04 | 0.93 | 62.33  | 6.74  |
| O70439 | Syntaxin-7 OS=Mus musculus GN=Stx7 PE=1 SV=3 - [STX7_MOUSE]                                             | 52.87 | 2 | 8  | 8  | 25  | 1.07 | 1.20 | 1.09 | 1.00 | 0.94 | 1.15 | 1.09 | 1.20 | 1.17 | 1.19 | 1.13 | 1.15 | 1.06 | 29.80  | 5.78  |
| O35449 | Proline-rich transmembrane protein 1 OS=Mus musculus GN=Prrt1 PE=1 SV=1 - [PRRT1_MOUSE]                 | 22.88 | 1 | 4  | 4  | 49  | 1.10 | 1.18 | 1.07 | 0.97 | 0.91 | 1.20 | 1.12 | 1.20 | 1.07 | 1.13 | 1.05 | 1.13 | 1.02 | 31.37  | 7.65  |
| Q8CC35 | Synaptodin OS=Mus musculus GN=Synpo PE=1 SV=2 - [SYNPO_MOUSE]                                           | 49.30 | 4 | 35 | 35 | 400 | 0.96 | 0.93 | 0.96 | 0.93 | 0.97 | 1.15 | 1.19 | 1.20 | 1.24 | 1.04 | 1.08 | 0.97 | 1.01 | 99.49  | 9.42  |
| Q1HKZ5 | Mitogen-activated protein kinase kinase 13 OS=Mus musculus GN=Map3k13 PE=2 SV=1 - [M3K13_MOUSE]         | 1.15  | 1 | 1  | 1  | 1   | 1.06 | 1.32 | 1.24 | 0.77 | 0.73 | 0.59 | 0.55 | 1.20 | 1.13 | 0.87 | 0.82 | 0.91 | 0.86 | 106.92 | 6.74  |
| P47877 | Insulin-like growth factor-binding protein 2 OS=Mus musculus GN=Igfbp2 PE=2 SV=2 - [IBP2_MOUSE]         | 8.20  | 2 | 2  | 2  | 6   | 1.06 | 1.04 | 0.97 | 0.98 | 0.87 | 1.19 | 1.01 | 1.20 | 1.07 | 1.26 | 1.11 | 1.06 | 1.00 | 32.83  | 7.64  |
| Q3UDK1 | Isoform 2 of TRAF-type zinc finger domain-containing protein 1 OS=Mus musculus GN=Traf1 - [TRAD1_MOUSE] | 13.19 | 3 | 5  | 5  | 9   | 1.11 | 1.18 | 1.01 | 1.06 | 0.95 | 1.19 | 1.05 | 1.20 | 1.10 | 1.11 | 0.98 | 1.08 | 1.07 | 63.82  | 5.41  |
| Q62093 | Serine/arginine-rich splicing factor 2 OS=Mus musculus GN=Srsf2 PE=1 SV=4 - [SRSF2_MOUSE]               | 15.38 | 1 | 4  | 4  | 62  | 1.09 | 1.08 | 0.98 | 0.97 | 0.90 | 1.08 | 0.99 | 1.20 | 1.10 | 1.12 | 1.01 | 1.04 | 0.95 | 25.46  | 11.85 |

|          |                                                                                                                               |       |     |    |    |     |      |      |      |      |      |      |      |      |      |      |      |      |      |        |      |
|----------|-------------------------------------------------------------------------------------------------------------------------------|-------|-----|----|----|-----|------|------|------|------|------|------|------|------|------|------|------|------|------|--------|------|
| Q3THJ3   | Probable RNA-binding protein EIF1AD<br>OS=Mus musculus<br>GN=Eif1ad PE=2<br>SV=2 -<br>[EIF1A_MOUSE]                           | 31.18 | 1   | 4  | 4  | 5   | 1.18 | 1.29 | 1.09 | 1.05 | 0.93 | 1.31 | 1.22 | 1.20 | 1.00 | 1.12 | 0.96 | 1.02 | 0.87 | 19.51  | 4.87 |
| Q9D2P4   | Ubiquitin-related modifier 1 homolog<br>OS=Mus musculus<br>GN=Urm1 PE=1 SV=1<br>-[URM1_MOUSE]                                 | 15.84 | 1   | 2  | 2  | 2   | 1.02 | 1.19 | 1.17 | 1.12 | 1.10 | 1.22 | 1.19 | 1.20 | 1.17 | 1.15 | 1.13 | 1.23 | 1.21 | 11.32  | 4.74 |
| Q80XU3   | Nuclear ubiquitously casein and cyclin-dependent kinase substrate 1 OS=Mus musculus GN=Nucks1<br>PE=1 SV=1 -<br>[NUCKS_MOUSE] | 46.15 | 1   | 7  | 7  | 115 | 1.12 | 1.04 | 0.90 | 1.07 | 0.90 | 1.24 | 1.05 | 1.20 | 1.08 | 1.14 | 1.03 | 1.07 | 0.97 | 26.30  | 5.14 |
| Q91W59-  | Isoform 2 of RNA-binding motif, single-stranded-interacting protein 1 OS=Mus musculus GN=Rbms1 -<br>[RBMS1_MOUSE]             | 10.81 | 11  | 3  | 3  | 6   | 0.95 | 0.78 | 0.81 | 0.93 | 0.98 | 1.24 | 1.28 | 1.20 | 1.27 | 1.00 | 1.06 | 0.81 | 0.86 | 39.98  | 8.12 |
| Q5DTX6   | Junctional protein associated with coronary artery disease OS=Mus musculus GN=Jcad PE=1 SV=2 -<br>[JCAD_MOUSE]                | 24.92 | 1   | 22 | 22 | 60  | 0.92 | 1.01 | 1.00 | 0.95 | 1.04 | 1.18 | 1.28 | 1.20 | 1.27 | 1.12 | 1.17 | 1.09 | 1.14 | 144.71 | 6.52 |
| D3YZR1   | Protein TSSC4 (Fragment) OS=Mus musculus GN=Tssc4<br>PE=2 SV=1 -<br>[D3YZR1_MOUSE]                                            | 43.32 | 5   | 6  | 6  | 9   | 1.07 | 0.98 | 1.04 | 0.93 | 0.84 | 1.12 | 1.11 | 1.20 | 1.09 | 1.14 | 1.00 | 1.16 | 1.10 | 23.29  | 4.64 |
| P50518   | V-type proton ATPase subunit E 1 OS=Mus musculus GN=Atp6v1e1 PE=1<br>SV=2 -<br>[VATE1_MOUSE]                                  | 70.35 | 2   | 20 | 20 | 217 | 0.97 | 0.96 | 1.02 | 0.96 | 1.01 | 1.24 | 1.28 | 1.20 | 1.25 | 1.13 | 1.16 | 1.10 | 1.14 | 26.14  | 8.43 |
| F7BIN0   | Nucleolar protein 4 (Fragment) OS=Mus musculus GN=Nol4<br>PE=4 SV=1 -<br>[F7BIN0_MOUSE]                                       | 14.32 | 6   | 2  | 4  | 5   | 1.06 | 1.31 | 1.23 | 1.15 | 1.08 | 1.47 | 1.38 | 1.20 | 1.12 | 1.13 | 1.06 | 1.00 | 0.94 | 45.98  | 5.50 |
| Q8BZR6   | TOM1-like protein 1 OS=Mus musculus GN=Tom111 PE=2<br>SV=1 -<br>[Q8BZR6_MOUSE]                                                | 5.79  | 5   | 1  | 2  | 5   | 1.44 | 0.89 | 0.62 | 0.97 | 0.67 | 1.25 | 0.86 | 1.20 | 0.83 | 1.47 | 1.02 | 1.46 | 1.01 | 44.06  | 5.00 |
| O35625-2 | Isoform 2 of Axin-1 OS=Mus musculus GN=Axin1 -<br>[AXIN1_MOUSE]                                                               | 5.80  | 5   | 4  | 4  | 7   | 1.03 | 1.15 | 1.11 | 1.04 | 1.04 | 1.13 | 1.08 | 1.20 | 1.21 | 1.13 | 1.07 | 1.26 | 1.16 | 92.36  | 6.93 |
| J3JS23   | Zinc finger protein 62 (Fragment) OS=Mus musculus GN=Zfp62<br>PE=4 SV=1 -<br>[J3JS23_MOUSE]                                   | 4.48  | 157 | 1  | 2  | 4   | 1.30 | 1.10 | 0.84 | 0.90 | 0.69 | 1.13 | 0.86 | 1.20 | 0.92 | 1.11 | 0.86 | 1.18 | 0.91 | 102.08 | 8.85 |

|          |                                                                                                                      |       |    |    |    |     |      |      |      |      |      |      |      |      |      |      |      |      |      |        |      |
|----------|----------------------------------------------------------------------------------------------------------------------|-------|----|----|----|-----|------|------|------|------|------|------|------|------|------|------|------|------|------|--------|------|
| Q8R550   | SH3 domain-containing kinase-binding protein 1<br>OS=Mus musculus<br>GN=Sh3kbp1 PE=1<br>SV=1 -<br>[SH3K1_MOUSE]      | 54.30 | 11 | 31 | 31 | 151 | 1.10 | 0.89 | 0.79 | 0.93 | 0.86 | 1.25 | 1.11 | 1.20 | 1.07 | 1.14 | 1.02 | 1.09 | 1.00 | 78.12  | 7.55 |
| P47930-2 | Isoform 2 of Fos-related antigen 2<br>OS=Mus musculus<br>GN=Fosl2 -<br>[FOSL2_MOUSE]                                 | 4.01  | 2  | 1  | 1  | 3   | 0.76 | 0.51 | 0.68 | 1.03 | 0.88 | 0.68 | 0.90 | 1.20 | 1.59 | 0.79 | 1.04 | 0.89 | 0.91 | 32.67  | 8.25 |
| Q6PDY0   | Coiled-coil domain-containing protein 85B<br>OS=Mus musculus<br>GN=Cdc85b PE=1<br>SV=1 -<br>[CC85B_MOUSE]            | 37.13 | 1  | 6  | 6  | 13  | 1.06 | 0.94 | 0.83 | 1.05 | 0.92 | 1.08 | 1.04 | 1.20 | 1.05 | 1.13 | 1.03 | 1.13 | 1.03 | 22.12  | 5.08 |
| P49710   | Hematopoietic lineage cell-specific protein<br>OS=Mus musculus<br>GN=Hcls1 PE=1 SV=2<br>- [HCLS1_MOUSE]              | 21.60 | 1  | 8  | 8  | 19  | 1.09 | 0.80 | 0.84 | 0.97 | 0.97 | 1.22 | 1.12 | 1.20 | 1.16 | 1.11 | 1.05 | 0.92 | 0.90 | 54.21  | 4.84 |
| Q9CZD5   | Translation initiation factor IF-3, mitochondrial<br>OS=Mus musculus<br>GN=Mif3 PE=1<br>SV=1 -<br>[IF3M_MOUSE]       | 15.22 | 3  | 4  | 4  | 8   | 0.97 | 0.97 | 0.97 | 0.79 | 0.80 | 1.18 | 1.18 | 1.20 | 1.25 | 1.11 | 1.15 | 0.96 | 0.96 | 31.72  | 9.42 |
| Q8BIF0-2 | Isoform 2 of CD99 antigen-like protein 2<br>OS=Mus musculus<br>GN=Cd99l2 -<br>[C99L2_MOUSE]                          | 34.11 | 4  | 4  | 4  | 10  | 1.14 | 0.74 | 0.63 | 0.94 | 0.83 | 1.17 | 1.04 | 1.20 | 1.05 | 1.10 | 0.91 | 1.07 | 0.88 | 22.80  | 4.65 |
| Q91Y11-2 | Isoform 2 of Autophagy-related protein 13<br>OS=Mus musculus<br>GN=Atg13 -<br>[ATG13_MOUSE]                          | 2.09  | 2  | 1  | 1  | 1   | 1.01 | 1.19 | 1.17 | 1.09 | 1.08 | 1.02 | 1.00 | 1.20 | 1.19 | 0.91 | 0.90 | 1.21 | 1.20 | 52.58  | 5.16 |
| F2Z4B3   | Cyclin-dependent kinase 2-associated protein 1<br>OS=Mus musculus<br>GN=Cdk2ap1 PE=2<br>SV=1 -<br>[F2Z4B3_MOUSE]     | 9.20  | 3  | 1  | 1  | 1   | 1.16 | 1.21 | 1.04 | 1.01 | 0.87 | 1.17 | 1.01 | 1.20 | 1.03 | 1.16 | 1.00 | 1.30 | 1.12 | 9.62   | 9.19 |
| P70441   | Na(+)/H(+) exchange regulatory cofactor<br>NHE-RF1<br>OS=Mus musculus<br>GN=Slc9a3r1 PE=1<br>SV=3 -<br>[NHRF1_MOUSE] | 64.79 | 2  | 22 | 22 | 319 | 1.00 | 0.77 | 0.77 | 0.94 | 0.92 | 1.22 | 1.19 | 1.20 | 1.18 | 1.01 | 1.00 | 0.90 | 0.89 | 38.58  | 5.90 |
| B8JK56   | Adenylate cyclase type 3<br>OS=Mus musculus<br>GN=Adcy3 PE=3<br>SV=1 -<br>[B8JK56_MOUSE]                             | 2.62  | 2  | 2  | 2  | 3   | 1.10 | 1.40 | 1.27 | 1.08 | 0.98 | 1.01 | 0.91 | 1.20 | 1.09 | 1.20 | 1.09 | 1.17 | 1.06 | 128.91 | 6.29 |
| Q9CR86   | Calcium-regulated heat stable protein 1<br>OS=Mus musculus<br>GN=Carhsp1 PE=1<br>SV=1 -<br>[CHSP1_MOUSE]             | 54.73 | 2  | 5  | 5  | 15  | 0.93 | 0.74 | 0.90 | 0.83 | 0.90 | 1.18 | 1.51 | 1.20 | 1.36 | 1.13 | 1.19 | 1.11 | 1.25 | 16.05  | 8.21 |



|        |                                                                                                                                     |       |   |    |    |    |      |      |      |      |      |      |      |      |      |      |      |      |      |       |       |
|--------|-------------------------------------------------------------------------------------------------------------------------------------|-------|---|----|----|----|------|------|------|------|------|------|------|------|------|------|------|------|------|-------|-------|
| Q9D0B5 | Thiosulfate sulfurtransferase/rhodanese-like domain-containing protein 3<br>OS=Mus musculus<br>GN=Tstd3 PE=2 SV=1<br>-[TSTD3_MOUSE] | 35.67 | 1 | 5  | 5  | 13 | 0.98 | 0.77 | 0.85 | 0.79 | 0.86 | 1.10 | 1.19 | 1.20 | 1.22 | 1.04 | 1.04 | 0.87 | 0.91 | 17.26 | 8.13  |
| P63037 | Dnaj homolog subfamily A member 1<br>OS=Mus musculus<br>GN=Dnaja1 PE=1<br>SV=1<br>-[DNJA1_MOUSE]                                    | 50.88 | 4 | 15 | 15 | 74 | 0.98 | 1.01 | 0.89 | 0.94 | 0.93 | 1.09 | 1.09 | 1.20 | 1.17 | 1.03 | 1.07 | 1.09 | 1.08 | 44.84 | 7.08  |
| P61458 | Pterin-4-alpha-carbinolamine dehydratase<br>OS=Mus musculus<br>GN=Pebd1 PE=1 SV=2<br>-[PHS_MOUSE]                                   | 22.12 | 1 | 2  | 2  | 3  | 1.87 | 1.04 | 0.55 | 1.05 | 0.56 | 1.30 | 0.69 | 1.20 | 0.64 | 1.47 | 0.79 | 1.35 | 0.72 | 11.98 | 6.80  |
| Q55YH9 | Neurofibromin (Fragment)<br>OS=Mus musculus<br>GN=Nf1 PE=2 SV=1<br>-[Q55YH9_MOUSE]                                                  | 6.78  | 1 | 1  | 4  | 6  | 0.98 | 1.09 | 1.11 | 0.88 | 0.89 | 0.84 | 0.85 | 1.20 | 1.22 | 0.94 | 0.96 | 1.24 | 1.26 | 92.15 | 8.15  |
| A8Y5N8 | Pleckstrin homology domain-containing family F member 2 (Fragment)<br>OS=Mus musculus<br>GN=Plekhl2 PE=2 SV=1<br>-[A8Y5N8_MOUSE]    | 10.66 | 2 | 1  | 1  | 2  | 0.99 | 0.82 | 0.83 | 1.07 | 1.08 | 1.12 | 1.13 | 1.20 | 1.21 | 1.00 | 1.01 | 1.12 | 1.13 | 22.09 | 9.45  |
| P20917 | Myelin-associated glycoprotein<br>OS=Mus musculus<br>GN=Mag PE=1 SV=2<br>-[MAG_MOUSE]                                               | 33.39 | 1 | 2  | 15 | 99 | 0.98 | 1.02 | 0.99 | 0.97 | 0.90 | 1.30 | 1.39 | 1.20 | 1.24 | 1.15 | 1.12 | 1.09 | 1.06 | 69.22 | 5.10  |
| Q8R1Y2 | Uncharacterized protein C16orf45 homolog<br>OS=Mus musculus<br>PE=2 SV=1<br>-[CP045_MOUSE]                                          | 29.06 | 3 | 7  | 7  | 12 | 1.19 | 0.82 | 0.70 | 1.06 | 0.88 | 1.32 | 1.12 | 1.20 | 0.98 | 1.30 | 1.09 | 1.16 | 0.98 | 23.45 | 5.63  |
| Q3UP38 | EF-hand calcium-binding domain-containing protein 4B<br>OS=Mus musculus<br>GN=Efcab4b PE=2 SV=1<br>-[EFC4B_MOUSE]                   | 2.90  | 1 | 1  | 1  | 2  | 1.00 | 1.15 | 1.15 | 1.00 | 1.00 | 1.18 | 1.18 | 1.20 | 1.20 | 1.10 | 1.10 | 1.13 | 1.13 | 35.82 | 4.67  |
| Q8VD63 | Testis-specific Y-encoded-like protein 4<br>OS=Mus musculus<br>GN=Tspy4 PE=1 SV=1<br>-[TSYL4_MOUSE]                                 | 17.00 | 1 | 5  | 5  | 10 | 0.98 | 0.95 | 1.04 | 0.90 | 0.93 | 1.03 | 0.92 | 1.20 | 1.22 | 1.04 | 1.07 | 0.91 | 0.96 | 44.78 | 6.99  |
| D3Z3A9 | Reticulocalbin-3 (Fragment)<br>OS=Mus musculus<br>GN=Rcn3 PE=2 SV=1<br>-[D3Z3A9_MOUSE]                                              | 10.95 | 4 | 2  | 2  | 4  | 1.16 | 0.98 | 0.84 | 1.02 | 0.88 | 1.25 | 1.08 | 1.20 | 1.04 | 1.41 | 1.22 | 1.27 | 1.10 | 31.82 | 4.89  |
| Q9CPW3 | 39S ribosomal protein L54, mitochondrial<br>OS=Mus musculus<br>GN=Mrpl54 PE=2 SV=1<br>-[RM54_MOUSE]                                 | 43.70 | 1 | 3  | 3  | 8  | 1.04 | 0.71 | 0.63 | 0.90 | 0.98 | 1.19 | 1.39 | 1.20 | 1.27 | 1.03 | 1.06 | 0.93 | 0.91 | 15.41 | 10.04 |

|        |                                                                                                                              |       |   |    |    |     |      |      |      |      |      |      |      |      |      |      |      |      |      |        |       |
|--------|------------------------------------------------------------------------------------------------------------------------------|-------|---|----|----|-----|------|------|------|------|------|------|------|------|------|------|------|------|------|--------|-------|
| Q80WJ7 | Protein LYRIC<br>OS=Mus musculus<br>GN=Mtdh PE=1 SV=1<br>-[LYRIC_MOUSE]                                                      | 49.91 | 6 | 23 | 23 | 73  | 1.07 | 1.04 | 0.98 | 1.06 | 1.01 | 1.22 | 1.20 | 1.20 | 1.15 | 1.18 | 1.09 | 1.05 | 1.02 | 63.81  | 9.33  |
| Q8BU04 | Putative E3 ubiquitin-<br>protein ligase UBR7<br>OS=Mus musculus<br>GN=Ubr7 PE=2 SV=1<br>[UBR7_MOUSE]                        | 13.18 | 2 | 5  | 5  | 15  | 1.00 | 0.90 | 0.87 | 0.99 | 0.91 | 1.19 | 1.19 | 1.20 | 1.20 | 1.06 | 1.08 | 0.91 | 0.84 | 48.03  | 4.75  |
| Q60605 | Myosin light<br>polypeptide 6 OS=Mus<br>musculus GN=Myl6<br>PE=1 SV=3<br>-[MYL6_MOUSE]                                       | 76.16 | 1 | 1  | 10 | 291 | 1.05 | 1.02 | 0.99 | 0.96 | 0.89 | 1.12 | 1.07 | 1.20 | 1.19 | 1.16 | 1.16 | 1.05 | 0.98 | 16.92  | 4.65  |
| Q8BHL8 | Proteasome inhibitor<br>PI31 subunit OS=Mus<br>musculus GN=Psmf1<br>PE=1 SV=1<br>-[PSMF1_MOUSE]                              | 20.66 | 1 | 4  | 4  | 9   | 0.92 | 1.02 | 1.07 | 0.95 | 1.11 | 0.86 | 1.15 | 1.20 | 1.34 | 1.03 | 1.08 | 0.88 | 1.12 | 29.65  | 5.25  |
| Q3THE2 | Myosin regulatory light<br>chain 12B OS=Mus<br>musculus GN=Myl12b<br>PE=1 SV=2<br>-[ML12B_MOUSE]                             | 62.21 | 3 | 1  | 8  | 344 | 1.07 | 1.24 | 1.13 | 1.00 | 0.91 | 1.12 | 1.06 | 1.20 | 1.15 | 1.21 | 1.12 | 1.22 | 1.12 | 19.77  | 4.84  |
| Q9Z2D8 | Methyl-CpG-binding<br>domain protein 3<br>OS=Mus musculus<br>GN=Mbd3 PE=1<br>SV=1<br>-[MBD3_MOUSE]                           | 24.91 | 5 | 7  | 8  | 16  | 0.97 | 0.95 | 0.93 | 1.00 | 1.00 | 1.20 | 1.14 | 1.20 | 1.15 | 1.05 | 1.04 | 0.94 | 0.97 | 32.15  | 5.82  |
| P62204 | Calmodulin OS=Mus<br>musculus GN=Calm1<br>PE=1 SV=2<br>-[CALM_MOUSE]                                                         | 83.89 | 5 | 11 | 12 | 919 | 0.99 | 0.82 | 0.85 | 0.85 | 0.87 | 1.18 | 1.23 | 1.20 | 1.27 | 1.02 | 1.07 | 0.96 | 1.00 | 16.83  | 4.22  |
| D3Z3Z8 | DNA-directed RNA<br>polymerase II subunit<br>RBP9 (Fragment)<br>OS=Mus musculus<br>GN=Polr2i PE=2<br>SV=1<br>-[D3Z3Z8_MOUSE] | 48.19 | 3 | 2  | 2  | 6   | 1.09 | 0.79 | 0.72 | 0.94 | 0.86 | 1.08 | 1.08 | 1.20 | 1.06 | 1.18 | 1.00 | 1.21 | 1.09 | 9.64   | 5.17  |
| Q9D2P8 | Myelin-associated<br>oligodendrocyte basic<br>protein OS=Mus<br>musculus GN=Mobp<br>PE=2 SV=1<br>-[MOBP_MOUSE]               | 17.06 | 1 | 3  | 3  | 4   | 0.81 | 0.86 | 0.91 | 0.92 | 1.13 | 1.36 | 1.67 | 1.20 | 1.48 | 1.28 | 1.58 | 0.99 | 1.29 | 19.19  | 11.14 |
| Q0P678 | Zinc finger CCCH<br>domain-containing<br>protein 18 OS=Mus<br>musculus GN=Zc3h18<br>PE=1 SV=1<br>-[ZCH18_MOUSE]              | 16.14 | 6 | 10 | 10 | 35  | 1.02 | 1.19 | 1.09 | 0.97 | 0.93 | 1.23 | 1.10 | 1.20 | 1.11 | 1.10 | 1.13 | 1.06 | 0.97 | 105.63 | 7.80  |
| M0QWP2 | ER membrane protein<br>complex subunit 8<br>(Fragment) OS=Mus<br>musculus GN=Emc8<br>PE=4 SV=1<br>-[M0QWP2_MOUSE]            | 43.36 | 3 | 4  | 4  | 6   | 0.96 | 0.83 | 0.93 | 1.03 | 1.15 | 1.12 | 1.25 | 1.20 | 1.25 | 1.19 | 1.24 | 1.00 | 1.12 | 16.30  | 4.87  |

|          |                                                                                                                               |       |   |    |    |     |      |      |      |      |      |      |      |      |      |      |      |      |      |        |      |
|----------|-------------------------------------------------------------------------------------------------------------------------------|-------|---|----|----|-----|------|------|------|------|------|------|------|------|------|------|------|------|------|--------|------|
| Q80Z38-3 | Isoform 3 of SH3 and multiple ankyrin repeat domains protein 2<br>OS=Mus musculus<br>GN=Shank2 - [SHAN2_MOUSE]                | 49.05 | 1 | 2  | 44 | 259 | 1.04 | 0.90 | 0.91 | 1.00 | 0.97 | 1.24 | 1.24 | 1.20 | 1.11 | 1.02 | 1.04 | 0.90 | 0.89 | 135.33 | 6.04 |
| Q80U04-2 | Isoform 2 of E3 ubiquitin-protein ligase Praja-2<br>OS=Mus musculus<br>GN=Pja2 - [PJA2_MOUSE]                                 | 31.94 | 2 | 10 | 11 | 75  | 1.02 | 1.10 | 1.10 | 0.96 | 0.90 | 1.17 | 1.15 | 1.20 | 1.20 | 1.13 | 1.09 | 1.04 | 1.04 | 71.20  | 4.53 |
| D3YWC9   | MTSS1-like protein<br>OS=Mus musculus<br>GN=Mtss1<br>PE=2<br>SV=1 - [D3YWC9_MOUSE]                                            | 14.70 | 4 | 5  | 5  | 29  | 1.06 | 1.01 | 0.96 | 0.98 | 0.91 | 1.14 | 1.04 | 1.20 | 1.19 | 1.24 | 1.19 | 1.29 | 1.15 | 70.04  | 7.30 |
| B2RW11   | Ankyrin repeat domain 34A<br>OS=Mus musculus<br>GN=Ankrd34a<br>PE=2<br>SV=1 - [B2RW11_MOUSE]                                  | 32.12 | 1 | 11 | 11 | 33  | 1.10 | 1.11 | 1.03 | 1.05 | 0.99 | 1.17 | 1.06 | 1.20 | 1.09 | 1.08 | 1.00 | 1.15 | 1.09 | 52.42  | 9.45 |
| E9Q6B2   | Coiled-coil domain-containing protein 85C<br>OS=Mus musculus<br>GN=Ccdc85c<br>PE=2<br>SV=1 - [CC85C_MOUSE]                    | 30.71 | 1 | 11 | 11 | 24  | 1.05 | 1.00 | 0.88 | 0.98 | 0.90 | 1.23 | 1.16 | 1.20 | 1.11 | 1.16 | 1.20 | 1.14 | 1.11 | 45.31  | 6.96 |
| O08989   | Ras-related protein M-Ras<br>OS=Mus musculus<br>GN=Mras<br>PE=1<br>SV=1 - [RASM_MOUSE]                                        | 35.58 | 2 | 5  | 5  | 13  | 0.98 | 0.95 | 0.97 | 0.99 | 1.08 | 0.99 | 1.03 | 1.21 | 1.37 | 1.00 | 1.04 | 0.96 | 1.00 | 23.89  | 8.78 |
| Q9Z2E2-5 | Isoform 5 of Methyl-CpG-binding domain protein 1<br>OS=Mus musculus<br>GN=Mbd1 - [MBD1_MOUSE]                                 | 4.04  | 5 | 2  | 2  | 3   | 1.00 | 1.05 | 1.05 | 1.02 | 1.02 | 1.25 | 1.24 | 1.21 | 1.20 | 1.13 | 1.13 | 1.20 | 1.20 | 62.04  | 8.59 |
| Q5Y5T5   | Probable palmitoyltransferase ZDHC8<br>OS=Mus musculus<br>GN=Zdhc8<br>PE=1<br>SV=1 - [ZDHC8_MOUSE]                            | 7.35  | 1 | 3  | 4  | 7   | 1.09 | 1.17 | 1.06 | 1.10 | 1.04 | 1.31 | 1.09 | 1.21 | 1.00 | 1.21 | 1.07 | 1.06 | 0.96 | 81.98  | 9.38 |
| G3X9X5   | Zinc finger CCCH type, antiviral 1, isoform CRA_b<br>OS=Mus musculus<br>GN=Zc3hav1<br>PE=4<br>SV=1 - [G3X9X5_MOUSE]           | 2.08  | 4 | 1  | 1  | 2   | 1.11 | 1.30 | 1.16 | 1.07 | 0.96 | 1.12 | 1.00 | 1.21 | 1.08 | 1.21 | 1.09 | 1.22 | 1.10 | 76.36  | 7.78 |
| O89116   | Vesicle transport through interaction with t-SNAREs homolog 1A<br>OS=Mus musculus<br>GN=Vti1a<br>PE=1<br>SV=1 - [VTI1A_MOUSE] | 17.51 | 1 | 2  | 2  | 15  | 0.91 | 1.06 | 1.09 | 0.96 | 1.08 | 0.99 | 1.08 | 1.21 | 1.19 | 1.05 | 1.06 | 0.97 | 0.99 | 24.97  | 6.40 |
| O54824-2 | Isoform 2 of Pro-interleukin-16<br>OS=Mus musculus<br>GN=Il16 - [IL16_MOUSE]                                                  | 2.56  | 2 | 1  | 1  | 2   | 0.99 | 0.80 | 0.81 | 0.98 | 0.98 | 1.17 | 1.17 | 1.21 | 1.21 | 1.20 | 1.21 | 1.01 | 1.02 | 66.43  | 6.29 |

|        |                                                                                                                          |       |   |     |     |      |      |      |      |      |      |      |      |      |      |      |      |      |      |        |      |
|--------|--------------------------------------------------------------------------------------------------------------------------|-------|---|-----|-----|------|------|------|------|------|------|------|------|------|------|------|------|------|------|--------|------|
| E9QKG6 | Ankyrin repeat domain-containing protein 17<br>OS=Mus musculus<br>GN=Ankr17 PE=2<br>SV=1 -<br>[E9QKG6_MOUSE]             | 3.49  | 5 | 4   | 5   | 7    | 1.03 | 0.99 | 0.95 | 1.00 | 0.94 | 0.99 | 0.90 | 1.21 | 1.15 | 1.10 | 1.13 | 1.09 | 1.06 | 246.47 | 6.70 |
| Q9D892 | Inosine triphosphate pyrophosphatase<br>OS=Mus musculus<br>GN=Itpa PE=1 SV=2 -<br>[ITPA_MOUSE]                           | 47.98 | 1 | 6   | 6   | 17   | 1.04 | 0.94 | 0.87 | 1.07 | 0.97 | 1.18 | 1.14 | 1.21 | 1.13 | 1.18 | 1.13 | 1.13 | 1.11 | 21.88  | 5.87 |
| P63213 | Guanine nucleotide-binding protein G(I)/G(S)/G(O) subunit gamma-2 OS=Mus musculus<br>GN=Gng2 PE=1 SV=2 -<br>[GBG2_MOUSE] | 54.93 | 1 | 4   | 5   | 95   | 1.01 | 0.80 | 0.84 | 0.98 | 1.00 | 1.30 | 1.31 | 1.21 | 1.17 | 1.19 | 1.18 | 1.08 | 1.05 | 7.85   | 7.99 |
| P47879 | Insulin-like growth factor-binding protein 4<br>OS=Mus musculus<br>GN=Igfbp4 PE=2<br>SV=2 -<br>[IBP4_MOUSE]              | 16.14 | 3 | 3   | 3   | 4    | 1.02 | 0.98 | 0.96 | 0.95 | 0.93 | 0.96 | 0.93 | 1.21 | 1.18 | 0.78 | 0.77 | 0.87 | 0.85 | 27.79  | 7.17 |
| D3Z598 | Latent-transforming growth factor beta-binding protein 4<br>OS=Mus musculus<br>GN=Ltbp4 PE=2 SV=1 -<br>[D3Z598_MOUSE]    | 8.99  | 7 | 8   | 8   | 16   | 0.97 | 1.16 | 1.23 | 0.95 | 0.98 | 0.90 | 1.08 | 1.21 | 1.29 | 1.26 | 1.36 | 1.14 | 1.19 | 166.66 | 5.11 |
| Q9D289 | Trafficking protein particle complex subunit 6B OS=Mus musculus<br>GN=Trappc6b PE=2<br>SV=1 -<br>[TPC6B_MOUSE]           | 8.23  | 1 | 1   | 1   | 2    | 1.18 | 1.26 | 1.06 | 1.03 | 0.87 | 1.09 | 0.92 | 1.21 | 1.02 | 1.38 | 1.17 | 1.24 | 1.05 | 17.92  | 8.68 |
| Q9EQU5 | Protein SET OS=Mus musculus<br>GN=Set PE=1 SV=1 -<br>[SET_MOUSE]                                                         | 51.90 | 4 | 2   | 12  | 187  | 0.86 | 0.80 | 0.93 | 1.01 | 1.17 | 1.15 | 1.32 | 1.21 | 1.39 | 1.25 | 1.45 | 1.01 | 1.17 | 33.36  | 4.32 |
| O88737 | Protein bassoon OS=Mus musculus<br>GN=Bsn PE=1 SV=4 -<br>[BSN_MOUSE]                                                     | 60.25 | 2 | 153 | 160 | 1487 | 1.00 | 0.97 | 0.97 | 0.96 | 0.95 | 1.18 | 1.17 | 1.21 | 1.20 | 1.08 | 1.08 | 1.01 | 1.00 | 418.59 | 7.71 |
| Q9WV52 | Pleckstrin-2 OS=Mus musculus<br>GN=Plek2 PE=1 SV=1 -<br>[PLEK2_MOUSE]                                                    | 4.82  | 1 | 1   | 1   | 1    | 1.05 | 0.87 | 0.82 | 0.91 | 0.87 | 1.24 | 1.18 | 1.21 | 1.15 | 1.09 | 1.04 | 0.95 | 0.91 | 39.99  | 9.45 |
| Q8K319 | Glucocorticoid-induced transcript 1 protein OS=Mus musculus<br>GN=Glic1 PE=1 SV=1 -<br>[GLC1_MOUSE]                      | 34.64 | 5 | 11  | 11  | 22   | 1.06 | 0.94 | 0.98 | 1.03 | 0.93 | 1.27 | 1.15 | 1.21 | 1.13 | 1.12 | 1.05 | 1.04 | 1.03 | 57.44  | 9.47 |
| F8W130 | Sorting nexin-7 OS=Mus musculus<br>GN=Snx7 PE=2 SV=1 -<br>[F8W130_MOUSE]                                                 | 12.81 | 4 | 4   | 4   | 6    | 0.90 | 1.14 | 1.33 | 1.13 | 1.27 | 1.00 | 1.10 | 1.21 | 1.13 | 1.09 | 1.23 | 1.07 | 1.29 | 50.85  | 4.82 |
| Q9JHS9 | Spliceosome-associated protein CWC15 homolog OS=Mus musculus<br>GN=Cwc15 PE=1 SV=1 -<br>[CWC15_MOUSE]                    | 24.45 | 1 | 6   | 6   | 12   | 1.06 | 0.85 | 0.77 | 0.99 | 0.92 | 1.21 | 1.25 | 1.21 | 1.22 | 1.03 | 0.99 | 0.96 | 1.06 | 26.61  | 5.71 |

|        |                                                                                                        |       |   |    |    |    |      |      |      |      |      |      |      |      |      |      |      |      |      |        |      |
|--------|--------------------------------------------------------------------------------------------------------|-------|---|----|----|----|------|------|------|------|------|------|------|------|------|------|------|------|------|--------|------|
| D6RET2 | Mesoderm induction early response protein 3 OS=Mus musculus GN=Mier3 PE=2 SV=1 - [D6RET2_MOUSE]        | 10.26 | 4 | 1  | 1  | 3  | 0.86 | 0.88 | 1.01 | 0.86 | 1.00 | 1.13 | 1.30 | 1.21 | 1.39 | 0.92 | 1.07 | 0.78 | 0.90 | 12.66  | 3.98 |
| D3YTV4 | Zinc finger protein with KRAB and SCAN domains 3 OS=Mus musculus GN=Zkscan3 PE=2 SV=1 - [D3YTV4_MOUSE] | 12.06 | 4 | 2  | 2  | 3  | 1.08 | 1.46 | 1.35 | 0.95 | 0.89 | 1.26 | 1.17 | 1.21 | 1.12 | 1.17 | 1.09 | 1.21 | 1.13 | 28.83  | 4.63 |
| Q02384 | Son of sevenless homolog 2 OS=Mus musculus GN=Sos2 PE=1 SV=2 - [SOS2_MOUSE]                            | 1.13  | 1 | 1  | 1  | 1  | 1.05 | 1.50 | 1.42 | 0.96 | 0.91 | 1.19 | 1.13 | 1.21 | 1.15 | 1.21 | 1.15 | 1.36 | 1.29 | 153.03 | 6.76 |
| Q9CPW2 | Adrenodoxin-like protein, mitochondrial OS=Mus musculus GN=Fdx11 PE=2 SV=1 - [ADXL_MOUSE]              | 47.13 | 2 | 7  | 7  | 28 | 1.08 | 0.94 | 0.87 | 0.95 | 0.89 | 1.19 | 0.99 | 1.21 | 1.03 | 1.00 | 0.87 | 1.00 | 0.90 | 18.75  | 6.04 |
| P06797 | Cathepsin L1 OS=Mus musculus GN=Cts11 PE=1 SV=2 - [CATL1_MOUSE]                                        | 41.02 | 1 | 7  | 7  | 40 | 1.05 | 0.94 | 0.85 | 0.88 | 0.87 | 1.09 | 1.06 | 1.21 | 1.16 | 1.01 | 1.02 | 0.95 | 0.95 | 37.52  | 6.83 |
| E9Q7U0 | Protein Kcamb3 OS=Mus musculus GN=Kcamb3 PE=4 SV=1 - [E9Q7U0_MOUSE]                                    | 12.55 | 1 | 1  | 1  | 1  | 1.27 | 0.57 | 0.45 | 0.96 | 0.76 | 1.42 | 1.11 | 1.21 | 0.95 | 1.40 | 1.10 | 1.07 | 0.85 | 26.47  | 7.91 |
| Q7M750 | Opalin OS=Mus musculus GN=Opalin PE=1 SV=1 - [OPALL_MOUSE]                                             | 32.17 | 1 | 3  | 3  | 23 | 0.99 | 1.12 | 1.20 | 0.94 | 0.99 | 1.14 | 1.18 | 1.21 | 1.27 | 1.25 | 1.28 | 1.14 | 1.21 | 15.82  | 4.88 |
| Q70166 | Stathmin-3 OS=Mus musculus GN=Stmn3 PE=1 SV=1 - [STMN3_MOUSE]                                          | 39.44 | 1 | 7  | 7  | 18 | 1.03 | 0.88 | 0.90 | 0.99 | 0.99 | 1.28 | 1.29 | 1.21 | 1.23 | 1.13 | 1.13 | 1.16 | 1.17 | 20.94  | 7.49 |
| Q6ZWZ6 | 40S ribosomal protein S12 OS=Mus musculus GN=Rps12 PE=2 SV=1 - [Q6ZWZ6_MOUSE]                          | 46.21 | 2 | 6  | 6  | 42 | 0.95 | 0.72 | 0.75 | 0.84 | 0.90 | 1.17 | 1.26 | 1.21 | 1.26 | 0.99 | 1.08 | 1.00 | 1.05 | 14.51  | 7.21 |
| Q80WTS | Isoform 2 of Aftiphilin OS=Mus musculus GN=Aftph - [AFTIN_MOUSE]                                       | 29.87 | 5 | 18 | 18 | 54 | 1.03 | 0.88 | 0.84 | 0.91 | 0.90 | 1.14 | 1.12 | 1.21 | 1.13 | 1.11 | 1.10 | 1.02 | 1.00 | 98.43  | 4.51 |
| Q60722 | Transcription factor 4 OS=Mus musculus GN=Tcf4 PE=1 SV=1 - [ITF2_MOUSE]                                | 6.72  | 5 | 2  | 3  | 7  | 0.92 | 1.09 | 1.25 | 0.97 | 1.00 | 1.00 | 1.08 | 1.21 | 1.23 | 0.99 | 1.07 | 1.03 | 1.07 | 71.58  | 7.17 |
| Q8VHI6 | Wiskott-Aldrich syndrome protein family member 3 OS=Mus musculus GN=Wasf3 PE=2 SV=1 - [WASF3_MOUSE]    | 30.94 | 2 | 9  | 10 | 45 | 1.01 | 0.93 | 0.90 | 0.93 | 0.96 | 1.17 | 1.15 | 1.21 | 1.23 | 1.15 | 1.10 | 1.08 | 1.14 | 55.17  | 6.37 |

|          |                                                                                                           |       |   |    |    |     |      |      |      |      |      |      |      |      |      |      |      |      |      |        |      |
|----------|-----------------------------------------------------------------------------------------------------------|-------|---|----|----|-----|------|------|------|------|------|------|------|------|------|------|------|------|------|--------|------|
| Q9JHL1   | Na(+)/H(+) exchange regulatory cofactor NHE-RF2 OS=Mus musculus GN=Slc9a3r2 PE=1 SV=2 - [NHRF2_MOUSE]     | 50.74 | 2 | 14 | 14 | 93  | 0.99 | 0.95 | 0.96 | 0.92 | 0.91 | 1.19 | 1.15 | 1.21 | 1.17 | 1.05 | 1.07 | 1.00 | 0.98 | 37.38  | 7.59 |
| P97347   | Reptin OS=Mus musculus GN=Rptn PE=1 SV=2 - [RPTN_MOUSE]                                                   | 0.98  | 1 | 1  | 1  | 1   | 1.17 | 1.15 | 0.98 | 1.15 | 0.98 | 1.07 | 0.90 | 1.21 | 1.03 | 1.27 | 1.09 | 1.21 | 1.03 | 128.54 | 7.61 |
| Q9ET26   | RING finger protein 114 OS=Mus musculus GN=Rnf114 PE=2 SV=2 - [RN114_MOUSE]                               | 22.27 | 1 | 3  | 3  | 8   | 1.16 | 0.98 | 0.88 | 0.92 | 0.83 | 1.27 | 1.12 | 1.21 | 1.02 | 1.10 | 1.05 | 1.31 | 1.18 | 25.73  | 7.03 |
| Q9JIG7   | Coiled-coil domain-containing protein 22 OS=Mus musculus GN=Ccdc22 PE=1 SV=1 - [CCD22_MOUSE]              | 7.34  | 1 | 4  | 4  | 7   | 0.97 | 1.27 | 0.80 | 0.98 | 1.04 | 0.96 | 1.03 | 1.21 | 1.21 | 1.39 | 1.13 | 1.22 | 1.01 | 70.80  | 6.01 |
| Q91YE8-2 | Isoform 2 of Synaptodin-2 OS=Mus musculus GN=Synpo2 - [SYNP2_MOUSE]                                       | 8.72  | 4 | 4  | 4  | 7   | 0.91 | 0.80 | 1.01 | 0.98 | 1.08 | 1.57 | 1.80 | 1.21 | 1.47 | 1.37 | 1.58 | 1.07 | 1.27 | 80.86  | 9.32 |
| Q5DQR4   | Isoform 4 of Syntaxin-binding protein 5-like OS=Mus musculus GN=Stxbp5l - [STB5L_MOUSE]                   | 12.23 | 5 | 1  | 10 | 19  | 1.49 | 1.45 | 0.97 | 1.35 | 0.90 | 1.34 | 0.90 | 1.21 | 0.81 | 1.25 | 0.84 | 1.23 | 0.83 | 122.79 | 6.54 |
| Q3U5F4   | YrdC domain-containing protein, mitochondrial OS=Mus musculus GN=Yrdc PE=1 SV=1 - [YRDC_MOUSE]            | 5.36  | 1 | 1  | 1  | 2   | 1.08 | 3.27 | 3.01 | 0.99 | 0.92 | 1.20 | 1.10 | 1.21 | 1.11 | 1.12 | 1.03 | 1.15 | 1.06 | 29.44  | 6.07 |
| Q9DCG9   | tRNA methyltransferase 112 homolog OS=Mus musculus GN=Trmt112 PE=2 SV=1 - [TR112_MOUSE]                   | 50.40 | 2 | 4  | 4  | 10  | 1.26 | 1.01 | 0.77 | 1.04 | 0.84 | 1.26 | 1.08 | 1.21 | 0.99 | 1.02 | 0.84 | 1.25 | 0.96 | 14.13  | 5.27 |
| Q80UF4   | Serologically defined colon cancer antigen 8 homolog OS=Mus musculus GN=Sdccag8 PE=1 SV=1 - [SDCG8_MOUSE] | 1.39  | 1 | 1  | 1  | 2   | 1.08 | 1.06 | 0.98 | 1.00 | 0.93 | 1.06 | 0.98 | 1.21 | 1.12 | 1.14 | 1.06 | 1.25 | 1.16 | 82.93  | 6.52 |
| P97868   | E3 ubiquitin-protein ligase RBBP6 OS=Mus musculus GN=Rbbp6 PE=1 SV=5 - [RBBP6_MOUSE]                      | 8.10  | 2 | 12 | 12 | 34  | 1.06 | 0.97 | 0.92 | 1.03 | 0.99 | 1.18 | 1.10 | 1.21 | 1.13 | 1.16 | 1.08 | 1.14 | 1.07 | 199.47 | 9.63 |
| Q91VW5   | Golgin subfamily A member 4 OS=Mus musculus GN=Golga4 PE=1 SV=2 - [GOGA4_MOUSE]                           | 27.21 | 1 | 49 | 49 | 115 | 1.03 | 0.95 | 0.93 | 0.91 | 0.89 | 1.23 | 1.18 | 1.21 | 1.15 | 1.11 | 1.08 | 1.00 | 0.97 | 257.41 | 5.36 |
| Q9CR80   | Protein FAM32A OS=Mus musculus GN=Fam32a PE=2 SV=1 - [FA32A_MOUSE]                                        | 27.68 | 1 | 3  | 3  | 5   | 1.11 | 1.00 | 1.08 | 1.20 | 1.08 | 1.35 | 1.03 | 1.21 | 1.09 | 1.18 | 1.07 | 1.16 | 1.05 | 13.21  | 9.94 |

|          |                                                                                                                         |       |    |    |    |     |      |      |      |      |      |      |      |      |      |      |      |      |      |        |      |
|----------|-------------------------------------------------------------------------------------------------------------------------|-------|----|----|----|-----|------|------|------|------|------|------|------|------|------|------|------|------|------|--------|------|
| G5E8E1   | Leucine rich repeat (In FLLI) interacting protein 1, isoform CRA_e OS=Mus musculus GN=Lrrfp1 PE=4 SV=1 - [G5E8E1_MOUSE] | 40.65 | 2  | 1  | 15 | 65  | 0.84 | 0.79 | 0.94 | 0.77 | 0.77 | 1.04 | 1.22 | 1.21 | 1.43 | 1.14 | 1.35 | 1.17 | 1.39 | 48.89  | 5.57 |
| Q80WC7   | Isoform 2 of Arf-GAP domain and FG repeat-containing protein 2 OS=Mus musculus GN=Agfg2 - [AGFG2_MOUSE]                 | 35.64 | 6  | 6  | 8  | 10  | 0.99 | 1.05 | 1.06 | 1.02 | 1.08 | 1.10 | 1.07 | 1.21 | 1.28 | 1.14 | 1.06 | 1.01 | 1.23 | 30.72  | 9.44 |
| P28656   | Nucleosome assembly protein 1-like 1 OS=Mus musculus GN=Nap111 PE=1 SV=2 - [NP111_MOUSE]                                | 37.85 | 3  | 9  | 10 | 106 | 0.99 | 0.79 | 0.82 | 0.83 | 0.87 | 1.17 | 1.16 | 1.21 | 1.25 | 1.02 | 1.10 | 1.00 | 1.04 | 45.32  | 4.46 |
| Q3UQN2   | Isoform 3 of FCH domain only protein 2 OS=Mus musculus GN=Fcho2 - [FCHO2_MOUSE]                                         | 3.38  | 2  | 1  | 1  | 2   | 0.99 | 1.05 | 1.06 | 0.99 | 1.00 | 1.13 | 1.13 | 1.21 | 1.22 | 1.14 | 1.16 | 1.11 | 1.13 | 46.94  | 6.34 |
| D3YZY3   | Transcription cofactor vestigial-like protein 4 (Fragment) OS=Mus musculus GN=Vgl4 PE=2 SV=1 - [D3YZY3_MOUSE]           | 8.47  | 3  | 1  | 1  | 2   | 0.86 | 1.34 | 1.56 | 0.89 | 1.04 | 1.35 | 1.57 | 1.21 | 1.41 | 1.16 | 1.36 | 1.08 | 1.26 | 20.40  | 8.94 |
| Q6PD21   | SH2 domain-containing adapter protein B OS=Mus musculus GN=Shb PE=1 SV=2 - [SHB_MOUSE]                                  | 6.16  | 3  | 2  | 2  | 4   | 1.02 | 0.99 | 0.97 | 0.95 | 0.93 | 1.06 | 1.04 | 1.21 | 1.19 | 0.96 | 0.94 | 1.18 | 1.16 | 54.67  | 8.78 |
| Q9CQF7   | Prefoldin 1 OS=Mus musculus GN=Pfdn1 PE=2 SV=1 - [Q9CQF7_MOUSE]                                                         | 50.00 | 2  | 4  | 5  | 30  | 1.03 | 0.89 | 0.88 | 0.96 | 0.91 | 1.19 | 1.17 | 1.21 | 1.22 | 1.04 | 1.10 | 1.00 | 0.99 | 14.25  | 6.81 |
| B1ASP0   | Ribonucleoprotein PTB-binding 2 OS=Mus musculus GN=Raver2 PE=2 SV=1 - [B1ASP0_MOUSE]                                    | 10.02 | 2  | 1  | 1  | 1   | 0.79 | 1.16 | 1.46 | 0.96 | 1.21 | 0.95 | 1.19 | 1.21 | 1.53 | 0.87 | 1.10 | 1.13 | 1.43 | 49.62  | 7.37 |
| Q3UTJ2-2 | Isoform 2 of Sorbin and SH3 domain-containing protein 2 OS=Mus musculus GN=Sorbs2 - [SRBS2_MOUSE]                       | 43.01 | 21 | 43 | 44 | 154 | 0.99 | 1.02 | 1.00 | 0.96 | 0.96 | 1.11 | 1.10 | 1.21 | 1.20 | 1.16 | 1.14 | 1.00 | 1.00 | 144.92 | 8.27 |
| Q9DAY7   | Mediator of RNA polymerase II transcription subunit 8 OS=Mus musculus GN=Med8 PE=2 SV=1 - [Q9DAY7_MOUSE]                | 8.12  | 2  | 1  | 1  | 2   | 0.81 | 1.48 | 1.83 | 0.76 | 0.94 | 0.70 | 0.86 | 1.21 | 1.50 | 0.56 | 0.69 | 0.66 | 0.81 | 25.94  | 6.90 |
| Q9CWK3   | CD2 antigen cytoplasmic tail-binding protein 2 OS=Mus musculus GN=Cd2bp2 PE=1 SV=1 - [CD2B2_MOUSE]                      | 44.44 | 1  | 9  | 9  | 39  | 0.93 | 0.87 | 0.90 | 0.96 | 1.00 | 1.29 | 1.30 | 1.21 | 1.29 | 1.08 | 1.14 | 1.01 | 1.14 | 37.67  | 4.60 |

|        |                                                                                                                      |       |    |    |    |     |      |      |      |      |      |      |      |      |      |      |      |      |      |        |       |
|--------|----------------------------------------------------------------------------------------------------------------------|-------|----|----|----|-----|------|------|------|------|------|------|------|------|------|------|------|------|------|--------|-------|
| Q9WUK2 | Eukaryotic translation initiation factor 4H<br>OS=Mus musculus<br>GN=Ei4h PE=1 SV=3<br>-[IF4H_MOUSE]                 | 52.82 | 2  | 10 | 10 | 189 | 1.03 | 0.85 | 0.78 | 0.94 | 0.93 | 1.21 | 1.21 | 1.21 | 1.16 | 1.08 | 1.03 | 0.95 | 0.95 | 27.32  | 7.23  |
| Q9WU12 | SNRPN upstream reading frame protein<br>OS=Mus musculus<br>GN=Snurf PE=1 SV=1<br>-[SNURF_MOUSE]                      | 32.39 | 1  | 2  | 2  | 3   | 1.24 | 1.88 | 1.52 | 0.94 | 0.76 | 1.19 | 0.95 | 1.21 | 0.98 | 1.18 | 0.95 | 1.10 | 0.89 | 8.40   | 10.58 |
| Q6NZF1 | Zinc finger CCCH domain-containing protein 11A<br>OS=Mus musculus<br>GN=Zc3h1.1a PE=1 SV=1<br>-[ZC11A_MOUSE]         | 19.07 | 1  | 12 | 12 | 24  | 1.03 | 0.87 | 0.90 | 0.95 | 0.93 | 1.20 | 1.16 | 1.21 | 1.14 | 1.10 | 1.01 | 1.06 | 1.00 | 86.44  | 8.13  |
| A2AFI8 | RalBP1-associated Eps domain-containing protein 2<br>OS=Mus musculus<br>GN=Reps2 PE=2 SV=1<br>-[A2AFI8_MOUSE]        | 33.54 | 4  | 14 | 15 | 34  | 0.98 | 0.96 | 0.99 | 0.87 | 0.93 | 1.16 | 1.25 | 1.21 | 1.23 | 1.11 | 1.13 | 1.01 | 1.02 | 70.44  | 7.25  |
| Q6A058 | Armadillo repeat-containing X-linked protein 2<br>OS=Mus musculus<br>GN=Armxc2 PE=2 SV=2<br>-[ARMX2_MOUSE]           | 6.38  | 1  | 3  | 3  | 6   | 0.98 | 1.22 | 1.18 | 0.98 | 0.95 | 1.12 | 1.08 | 1.21 | 1.18 | 1.17 | 1.13 | 1.15 | 1.18 | 80.99  | 9.33  |
| D6RG94 | Cadherin-8<br>OS=Mus musculus<br>GN=Cdh8 PE=2 SV=1<br>-[D6RG94_MOUSE]                                                | 11.20 | 6  | 4  | 4  | 10  | 1.00 | 1.22 | 1.22 | 1.10 | 1.07 | 1.13 | 1.11 | 1.21 | 1.21 | 1.14 | 1.13 | 1.16 | 1.18 | 56.47  | 5.16  |
| E9Q6Q2 | Serine/threonine-protein kinase WNK2<br>OS=Mus musculus<br>GN=Wnk2 PE=2 SV=1<br>-[E9Q6Q2_MOUSE]                      | 19.74 | 18 | 24 | 26 | 71  | 1.02 | 0.92 | 0.94 | 1.00 | 0.96 | 1.25 | 1.20 | 1.22 | 1.22 | 1.22 | 1.18 | 1.16 | 1.15 | 210.99 | 5.78  |
| Q9WTQ5 | A-kinase anchor protein 12<br>OS=Mus musculus<br>GN=Akap12 PE=1 SV=1<br>-[AKA12_MOUSE]                               | 44.60 | 2  | 47 | 47 | 160 | 1.07 | 0.90 | 0.84 | 0.92 | 0.89 | 1.19 | 1.14 | 1.22 | 1.18 | 1.12 | 1.11 | 0.98 | 0.98 | 180.59 | 4.44  |
| G5E850 | Cytochrome b-5, isoform CRA_a<br>OS=Mus musculus<br>GN=Cyb5 PE=3 SV=1<br>-[G5E850_MOUSE]                             | 56.12 | 3  | 4  | 4  | 31  | 0.95 | 1.07 | 1.10 | 1.04 | 0.99 | 1.25 | 1.23 | 1.22 | 1.24 | 1.13 | 1.13 | 1.08 | 1.09 | 11.14  | 5.30  |
| E9QQ10 | A-kinase anchor protein 9<br>OS=Mus musculus<br>GN=Akap9 PE=2 SV=1<br>-[E9QQ10_MOUSE]                                | 12.23 | 4  | 34 | 34 | 61  | 1.03 | 1.17 | 1.10 | 0.99 | 0.99 | 1.26 | 1.28 | 1.22 | 1.22 | 1.18 | 1.18 | 1.18 | 1.11 | 433.87 | 5.03  |
| O08972 | Dimethylarginine dimethylaminohydrolase 2, isoform CRA_a<br>OS=Mus musculus<br>GN=DDah2 PE=2 SV=1<br>-[O08972_MOUSE] | 32.38 | 3  | 5  | 6  | 19  | 1.05 | 1.02 | 0.96 | 1.00 | 0.94 | 1.29 | 1.17 | 1.22 | 1.16 | 1.36 | 1.41 | 1.46 | 1.34 | 25.35  | 6.06  |



|          |                                                                                                                |       |    |    |    |     |      |      |      |      |      |      |      |      |      |      |      |      |      |        |      |
|----------|----------------------------------------------------------------------------------------------------------------|-------|----|----|----|-----|------|------|------|------|------|------|------|------|------|------|------|------|------|--------|------|
| Q9Z2U2-2 | Isoform 2 of Zinc finger protein 292<br>OS=Mus musculus<br>GN=Zfp292 -<br>[ZN292_MOUSE]                        | 1.26  | 2  | 1  | 1  | 1   | 1.23 | 1.01 | 0.82 | 1.32 | 1.07 | 1.48 | 1.20 | 1.22 | 0.98 | 1.17 | 0.95 | 1.47 | 1.19 | 300.26 | 7.56 |
| Q61160   | Protein FADD<br>OS=Mus musculus<br>GN=Fadd PE=1 SV=1 -<br>[FADD_MOUSE]                                         | 4.39  | 1  | 1  | 1  | 2   | 0.74 | 0.91 | 1.22 | 0.78 | 1.05 | 1.00 | 1.34 | 1.22 | 1.63 | 0.99 | 1.33 | 1.01 | 1.36 | 22.95  | 6.04 |
| Q63850   | Nuclear pore glycoprotein p62<br>OS=Mus musculus<br>GN=Nup62 PE=1<br>SV=2 -<br>[NUP62_MOUSE]                   | 24.71 | 1  | 10 | 10 | 53  | 1.02 | 0.91 | 0.92 | 0.90 | 0.88 | 1.17 | 1.12 | 1.22 | 1.19 | 1.05 | 1.04 | 0.97 | 0.95 | 53.22  | 5.31 |
| Q9WTP2   | Protein sprouty homolog 4<br>OS=Mus musculus<br>GN=Spry4 PE=2 SV=1 -<br>[SPY4_MOUSE]                           | 9.67  | 1  | 2  | 2  | 4   | 1.08 | 1.22 | 1.13 | 1.01 | 0.93 | 1.11 | 1.02 | 1.22 | 1.12 | 1.12 | 1.04 | 1.04 | 0.97 | 32.50  | 7.88 |
| B1AX19   | 5-azacytidine induced gene 1<br>OS=Mus musculus<br>GN=Azi1 PE=2 SV=1 -<br>[B1AX19_MOUSE]                       | 3.59  | 3  | 3  | 3  | 5   | 1.04 | 1.12 | 1.04 | 1.02 | 0.98 | 1.14 | 1.05 | 1.22 | 1.13 | 1.08 | 1.00 | 0.96 | 0.92 | 120.16 | 8.65 |
| Q6P6I8   | Signal-regulatory protein alpha<br>OS=Mus musculus<br>GN=Sirpa PE=2 SV=1 -<br>[Q6P6I8_MOUSE]                   | 48.92 | 5  | 1  | 19 | 212 | 1.11 | 1.14 | 0.96 | 1.06 | 0.99 | 1.19 | 0.95 | 1.22 | 1.10 | 1.18 | 1.03 | 1.12 | 0.98 | 55.95  | 8.28 |
| O88622-2 | Isoform 2 of Poly(ADP-ribose) glycohydrolase<br>OS=Mus musculus<br>GN=Parg -<br>[PARG_MOUSE]                   | 4.13  | 5  | 3  | 3  | 5   | 0.96 | 0.75 | 0.77 | 0.97 | 1.02 | 1.10 | 1.16 | 1.22 | 1.16 | 1.13 | 1.13 | 1.14 | 1.07 | 103.71 | 6.80 |
| Q9CQ7    | 39S ribosomal protein L41, mitochondrial<br>OS=Mus musculus<br>GN=Mrpl41 PE=2<br>SV=1 -<br>[RM41_MOUSE]        | 51.85 | 2  | 6  | 6  | 14  | 1.02 | 0.77 | 0.76 | 0.91 | 0.90 | 1.35 | 1.30 | 1.22 | 1.18 | 1.12 | 1.10 | 1.08 | 1.06 | 15.25  | 9.82 |
| Q6PAQ9   | Transmembrane gamma-carboxyglutamic acid protein 3<br>OS=Mus musculus<br>GN=Prg3 PE=2 SV=2 -<br>[TMG3_MOUSE]   | 6.06  | 1  | 1  | 1  | 2   | 1.00 | 1.05 | 1.05 | 1.01 | 1.01 | 1.16 | 1.16 | 1.22 | 1.22 | 1.05 | 1.06 | 0.91 | 0.92 | 25.86  | 6.30 |
| Q9CZG3   | COMM domain-containing protein 8<br>OS=Mus musculus<br>GN=Comm8 PE=2<br>SV=1 -<br>[COMD8_MOUSE]                | 14.21 | 1  | 2  | 2  | 3   | 1.28 | 1.16 | 0.91 | 1.21 | 0.73 | 1.28 | 1.07 | 1.22 | 1.24 | 1.16 | 0.99 | 1.45 | 1.14 | 20.84  | 5.59 |
| E9Q2Y9   | Desumoylating isopeptidase 1<br>OS=Mus musculus<br>GN=Desi1 PE=2 SV=1 -<br>[E9Q2Y9_MOUSE]                      | 19.51 | 5  | 1  | 1  | 1   | 0.96 | 0.80 | 0.83 | 1.03 | 1.08 | 1.31 | 1.36 | 1.22 | 1.27 | 1.21 | 1.27 | 1.21 | 1.27 | 4.67   | 9.47 |
| Q64487-1 | Isoform C of Receptor-type tyrosine-protein phosphatase delta<br>OS=Mus musculus<br>GN=Ptpd -<br>[PTPRD_MOUSE] | 33.97 | 14 | 1  | 42 | 141 | 0.98 | 1.53 | 1.56 | 1.02 | 1.04 | 1.11 | 1.13 | 1.22 | 1.24 | 1.03 | 1.06 | 1.03 | 1.06 | 212.01 | 6.68 |

|          |                                                                                                               |       |   |    |    |     |      |      |      |      |      |      |      |      |      |      |      |      |      |        |      |
|----------|---------------------------------------------------------------------------------------------------------------|-------|---|----|----|-----|------|------|------|------|------|------|------|------|------|------|------|------|------|--------|------|
| Q9WTJ4   | Fh3-interacting zinc finger protein 1<br>OS=Mus musculus<br>GN=Fiz1 PE=1 SV=1 -<br>[FIZ1_MOUSE]               | 2.00  | 1 | 1  | 1  | 2   | 1.02 | 0.99 | 0.97 | 1.08 | 1.06 | 1.29 | 1.26 | 1.22 | 1.19 | 1.16 | 1.14 | 1.16 | 1.14 | 52.65  | 7.94 |
| P15532   | Nucleoside diphosphate kinase A<br>OS=Mus musculus<br>GN=Nme1 PE=1 SV=1 -<br>[NDKA_MOUSE]                     | 74.34 | 3 | 3  | 11 | 86  | 1.00 | 0.85 | 0.81 | 0.92 | 0.93 | 1.15 | 1.18 | 1.22 | 1.22 | 1.18 | 1.11 | 1.14 | 1.10 | 17.20  | 7.37 |
| Q8BJ05-3 | Isoform 3 of Zinc finger CCCH domain-containing protein 14<br>OS=Mus musculus<br>GN=Zc3h14 -<br>[ZC3HE_MOUSE] | 31.95 | 3 | 1  | 13 | 30  | 1.03 | 0.42 | 0.44 | 1.03 | 1.00 | 1.43 | 1.39 | 1.22 | 1.18 | 1.04 | 1.01 | 0.95 | 0.92 | 67.80  | 8.06 |
| B1AQX9   | SRC kinase-signaling inhibitor 1<br>OS=Mus musculus<br>GN=Srcin1 PE=2 SV=1 -<br>[B1AQX9_MOUSE]                | 48.40 | 2 | 2  | 43 | 160 | 0.95 | 1.08 | 1.16 | 1.00 | 1.09 | 1.25 | 1.26 | 1.22 | 1.28 | 1.16 | 1.24 | 1.14 | 1.22 | 130.53 | 9.25 |
| P14602-3 | Isoform C of Heat shock protein beta-1<br>OS=Mus musculus<br>GN=Hspb1 -<br>[HSPB1_MOUSE]                      | 38.29 | 4 | 4  | 4  | 5   | 1.20 | 1.07 | 0.86 | 1.13 | 0.93 | 1.09 | 0.91 | 1.22 | 0.98 | 1.24 | 1.01 | 1.12 | 0.97 | 19.37  | 6.95 |
| D3YWN7   | Enconsin<br>OS=Mus musculus<br>GN=Map7 PE=4 SV=2 -<br>[D3YWN7_MOUSE]                                          | 26.15 | 5 | 14 | 15 | 28  | 1.00 | 1.12 | 1.13 | 1.00 | 0.98 | 1.09 | 1.05 | 1.22 | 1.05 | 1.17 | 1.08 | 1.10 | 1.15 | 82.79  | 9.38 |
| Q64704-3 | Isoform 3C of Syntaxin-3<br>OS=Mus musculus<br>GN=Stx3 -<br>[STX3_MOUSE]                                      | 11.52 | 6 | 1  | 2  | 7   | 1.37 | 1.37 | 0.99 | 0.97 | 0.70 | 1.49 | 1.08 | 1.22 | 0.88 | 1.52 | 1.11 | 1.15 | 0.84 | 30.91  | 5.63 |
| Q3UN16   | Probable G-protein coupled receptor 162<br>OS=Mus musculus<br>GN=Gpr162 PE=2 SV=2 -<br>[GP162_MOUSE]          | 11.73 | 1 | 4  | 4  | 11  | 1.07 | 1.17 | 1.07 | 1.14 | 1.00 | 1.15 | 1.15 | 1.22 | 1.11 | 1.14 | 1.12 | 0.99 | 0.95 | 64.11  | 8.79 |
| Q8C9B9   | Death-inducer obliterator 1<br>OS=Mus musculus<br>GN=Dido1 PE=1 SV=4 -<br>[DIDO1_MOUSE]                       | 6.43  | 4 | 8  | 9  | 14  | 1.05 | 0.98 | 0.93 | 1.02 | 1.04 | 1.18 | 1.10 | 1.22 | 1.21 | 1.22 | 1.16 | 1.16 | 1.09 | 247.02 | 7.91 |
| Q80SY4   | E3 ubiquitin-protein ligase MIB1<br>OS=Mus musculus<br>GN=Mib1 PE=1 SV=1 -<br>[MIB1_MOUSE]                    | 0.99  | 1 | 1  | 1  | 2   | 1.03 | 1.03 | 1.00 | 1.10 | 1.07 | 1.24 | 1.20 | 1.22 | 1.18 | 1.13 | 1.10 | 1.07 | 1.05 | 110.02 | 6.92 |
| Q8C180   | Fibroblast growth factor receptor substrate 2<br>OS=Mus musculus<br>GN=Frs2 PE=1 SV=3 -<br>[FRS2_MOUSE]       | 12.99 | 1 | 4  | 4  | 8   | 1.12 | 0.96 | 0.81 | 1.01 | 0.89 | 1.28 | 1.16 | 1.22 | 1.12 | 1.22 | 1.11 | 1.06 | 0.93 | 56.76  | 6.16 |
| Q8BMK4   | Cytoskeleton-associated protein 4<br>OS=Mus musculus<br>GN=Ckap4 PE=2 SV=2 -<br>[CKAP4_MOUSE]                 | 23.65 | 1 | 14 | 14 | 25  | 1.01 | 1.05 | 1.01 | 1.04 | 1.00 | 1.28 | 1.26 | 1.22 | 1.19 | 1.17 | 1.14 | 1.02 | 1.01 | 63.65  | 5.64 |

|        |                                                                                                          |       |   |    |    |     |      |      |      |      |      |      |      |      |      |      |      |      |      |        |      |
|--------|----------------------------------------------------------------------------------------------------------|-------|---|----|----|-----|------|------|------|------|------|------|------|------|------|------|------|------|------|--------|------|
| A2A6T1 | Cerebellar degeneration related protein 2-like OS=Mus musculus GN=Cdr2l PE=2 SV=1 - [CDR2L_MOUSE]        | 13.98 | 1 | 5  | 5  | 19  | 1.00 | 0.97 | 0.97 | 0.85 | 0.85 | 1.25 | 1.14 | 1.22 | 1.22 | 0.90 | 0.96 | 1.07 | 0.96 | 53.18  | 5.76 |
| E9QKB2 | Intracellular hyaluronan-binding protein 4 OS=Mus musculus GN=Habp4 PE=2 SV=1 - [E9QKB2_MOUSE]           | 54.85 | 2 | 16 | 16 | 102 | 1.14 | 0.94 | 0.83 | 0.97 | 0.93 | 1.25 | 1.12 | 1.22 | 1.05 | 1.09 | 0.97 | 1.04 | 0.95 | 45.94  | 6.84 |
| I6L9J1 | Cadherin-22 OS=Mus musculus GN=Cdh22 PE=2 SV=1 - [I6L9J1_MOUSE]                                          | 2.45  | 3 | 1  | 1  | 2   | 0.96 | 1.05 | 1.09 | 0.85 | 0.88 | 1.14 | 1.18 | 1.22 | 1.27 | 0.98 | 1.03 | 0.87 | 0.91 | 44.67  | 4.77 |
| A2AJW5 | Uncharacterized protein OS=Mus musculus GN=Fam217b PE=4 SV=1 - [A2AJW5_MOUSE]                            | 26.36 | 1 | 7  | 7  | 20  | 1.00 | 1.06 | 1.10 | 1.01 | 1.03 | 1.24 | 1.28 | 1.22 | 1.18 | 1.17 | 1.18 | 1.00 | 1.03 | 42.11  | 9.45 |
| Q9D8S3 | ADP-ribosylation factor GTPase-activating protein 3 OS=Mus musculus GN=Arfgap3 PE=2 SV=2 - [ARFG3_MOUSE] | 14.72 | 1 | 6  | 6  | 9   | 1.16 | 1.10 | 1.00 | 1.05 | 0.92 | 1.14 | 0.98 | 1.22 | 1.10 | 1.19 | 1.03 | 1.10 | 1.06 | 57.42  | 8.47 |
| Q9ESC8 | AF4/FMR2 family member 4 OS=Mus musculus GN=Aff4 PE=1 SV=1 - [AFF4_MOUSE]                                | 2.24  | 2 | 2  | 2  | 3   | 0.94 | 1.03 | 1.09 | 0.96 | 1.03 | 1.05 | 1.11 | 1.22 | 1.29 | 1.03 | 1.10 | 1.10 | 1.17 | 126.56 | 9.36 |
| Q561M1 | Acp1 protein OS=Mus musculus GN=Acp1 PE=2 SV=1 - [Q561M1_MOUSE]                                          | 49.37 | 2 | 1  | 4  | 39  | 0.98 | 0.92 | 1.02 | 0.96 | 0.95 | 1.00 | 1.06 | 1.22 | 1.24 | 1.07 | 1.12 | 1.02 | 1.09 | 17.91  | 6.54 |
| P63038 | 60 kDa heat shock protein, mitochondrial OS=Mus musculus GN=Hspd1 PE=1 SV=1 - [CH60_MOUSE]               | 76.79 | 4 | 36 | 36 | 512 | 0.97 | 0.87 | 0.92 | 0.98 | 1.01 | 1.23 | 1.29 | 1.22 | 1.28 | 1.18 | 1.21 | 1.12 | 1.15 | 60.92  | 6.18 |
| Q9JJX7 | Tyrosyl-DNA phosphodiesterase 2 OS=Mus musculus GN=Tdp2 PE=1 SV=1 - [TYDP2_MOUSE]                        | 3.78  | 1 | 1  | 1  | 3   | 0.89 | 1.05 | 0.98 | 0.91 | 1.02 | 1.54 | 1.72 | 1.22 | 1.37 | 0.83 | 0.94 | 1.32 | 1.25 | 41.01  | 5.50 |
| P28798 | Granulins OS=Mus musculus GN=Gm PE=1 SV=2 - [GRN_MOUSE]                                                  | 16.98 | 4 | 7  | 7  | 15  | 0.95 | 0.85 | 1.03 | 0.99 | 1.05 | 1.13 | 1.22 | 1.22 | 1.24 | 1.08 | 1.05 | 1.06 | 1.12 | 63.41  | 6.80 |
| Q69ZQ2 | Pre-mRNA-splicing factor ISY1 homolog OS=Mus musculus GN=Isy1 PE=1 SV=2 - [ISY1_MOUSE]                   | 25.61 | 1 | 6  | 6  | 10  | 0.95 | 0.86 | 0.91 | 1.03 | 1.05 | 1.07 | 1.07 | 1.22 | 1.30 | 1.05 | 1.04 | 1.05 | 1.10 | 32.97  | 5.17 |
| P08551 | Neurofilament light polypeptide OS=Mus musculus GN=Nefl PE=1 SV=5 - [NFL_MOUSE]                          | 62.80 | 1 | 35 | 39 | 783 | 0.96 | 1.00 | 1.03 | 0.98 | 1.02 | 1.16 | 1.17 | 1.22 | 1.25 | 1.12 | 1.11 | 1.07 | 1.09 | 61.47  | 4.64 |
| Q62011 | Podoplanin OS=Mus musculus GN=Pdpn PE=1 SV=2 - [PDPN_MOUSE]                                              | 6.98  | 1 | 1  | 1  | 1   | 1.41 | 0.75 | 0.53 | 1.05 | 0.74 | 1.34 | 0.94 | 1.22 | 0.86 | 1.11 | 0.78 | 1.20 | 0.85 | 18.22  | 5.53 |

|         |                                                                                                                         |       |    |    |    |     |      |      |      |      |      |      |      |      |      |      |      |      |      |        |       |
|---------|-------------------------------------------------------------------------------------------------------------------------|-------|----|----|----|-----|------|------|------|------|------|------|------|------|------|------|------|------|------|--------|-------|
| Q9CWU4  | UPF0690 protein C1orf52 homolog OS=Mus musculus PE=1 SV=1 - [CA052_MOUSE]                                               | 52.22 | 3  | 7  | 7  | 38  | 1.05 | 0.76 | 0.74 | 0.94 | 0.94 | 1.18 | 1.18 | 1.22 | 1.22 | 1.08 | 1.10 | 0.88 | 0.92 | 20.09  | 5.11  |
| Q8CCT4  | Transcription elongation factor A protein-like 5 OS=Mus musculus GN=Tceal5 PE=1 SV=1 - [TCAL5_MOUSE]                    | 59.50 | 3  | 8  | 15 | 171 | 0.83 | 0.62 | 0.78 | 0.89 | 1.11 | 1.07 | 1.47 | 1.22 | 1.57 | 1.09 | 1.47 | 0.77 | 1.02 | 22.02  | 6.20  |
| Q9CZX8  | 40S ribosomal protein S19 OS=Mus musculus GN=Rps19 PE=1 SV=3 - [RS19_MOUSE]                                             | 49.66 | 5  | 10 | 10 | 31  | 0.98 | 0.89 | 0.91 | 0.90 | 0.94 | 1.17 | 1.13 | 1.22 | 1.25 | 1.07 | 1.14 | 1.02 | 1.03 | 16.08  | 10.40 |
| Q9D8X2  | Coiled-coil domain-containing protein 124 OS=Mus musculus GN=Ccdc124 PE=2 SV=1 - [CC124_MOUSE]                          | 47.47 | 1  | 10 | 10 | 43  | 1.08 | 0.97 | 0.90 | 0.97 | 0.91 | 1.22 | 1.04 | 1.22 | 1.08 | 1.14 | 1.00 | 1.02 | 0.94 | 25.33  | 9.64  |
| B1AWC9  | Protein Pde4b OS=Mus musculus GN=Pde4b PE=2 SV=1 - [B1AWC9_MOUSE]                                                       | 20.65 | 10 | 9  | 12 | 26  | 1.11 | 1.06 | 0.89 | 1.02 | 0.98 | 1.11 | 1.00 | 1.22 | 1.03 | 1.07 | 0.97 | 1.10 | 0.96 | 83.25  | 5.26  |
| Q3V3V9- | Isoform 2 of Leucine-rich repeat-containing protein 16C OS=Mus musculus GN=Rllpr - [LR16C_MOUSE]                        | 31.57 | 2  | 16 | 16 | 91  | 1.08 | 1.20 | 1.08 | 1.01 | 0.93 | 1.15 | 1.05 | 1.22 | 1.10 | 1.11 | 1.03 | 1.06 | 0.99 | 79.71  | 6.77  |
| B1ASC0  | Brain-specific angiogenesis inhibitor 2 OS=Mus musculus GN=Bai2 PE=2 SV=2 - [B1ASC0_MOUSE]                              | 5.91  | 7  | 5  | 6  | 14  | 1.12 | 1.34 | 1.14 | 1.11 | 1.01 | 1.10 | 1.00 | 1.22 | 1.12 | 1.12 | 0.99 | 1.20 | 1.07 | 160.46 | 7.12  |
| Q9CQH7  | Transcription factor BTF3 homolog 4 OS=Mus musculus GN=Btf3l4 PE=2 SV=1 - [BT3L4_MOUSE]                                 | 37.34 | 1  | 7  | 7  | 83  | 1.05 | 0.73 | 0.72 | 0.97 | 0.97 | 1.22 | 1.13 | 1.22 | 1.15 | 1.09 | 0.96 | 1.01 | 0.87 | 17.26  | 6.35  |
| B1AT9   | Growth arrest-specific protein 7 OS=Mus musculus GN=Gas7 PE=4 SV=1 - [B1AT9_MOUSE]                                      | 45.87 | 4  | 19 | 20 | 108 | 0.99 | 0.92 | 0.94 | 0.90 | 0.88 | 1.19 | 1.17 | 1.22 | 1.24 | 1.07 | 1.07 | 1.02 | 1.04 | 47.23  | 7.59  |
| J3KMJ8  | Axonemal dynein light chain domain-containing protein 1 (Fragment) OS=Mus musculus GN=Axdnd1 PE=4 SV=1 - [J3KMJ8_MOUSE] | 0.80  | 2  | 1  | 1  | 1   | 1.16 | 0.86 | 0.74 | 1.25 | 1.08 | 1.20 | 1.03 | 1.22 | 1.05 | 0.95 | 0.82 | 1.13 | 0.98 | 102.24 | 6.13  |
| Q3ZQA4  | Autophagy 9-like 1 protein OS=Mus musculus GN=Atg9a PE=2 SV=1 - [Q3ZQA4_MOUSE]                                          | 4.65  | 2  | 2  | 2  | 8   | 1.13 | 1.48 | 1.31 | 1.34 | 1.18 | 1.12 | 0.99 | 1.22 | 1.08 | 1.10 | 0.97 | 1.13 | 1.00 | 94.36  | 6.64  |

|          |                                                                                                                            |       |   |    |    |     |      |      |      |      |      |      |      |      |      |      |      |      |      |        |      |
|----------|----------------------------------------------------------------------------------------------------------------------------|-------|---|----|----|-----|------|------|------|------|------|------|------|------|------|------|------|------|------|--------|------|
| Q9D1J3   | SAP domain-containing ribonucleoprotein OS=Mus musculus GN=Sarnp PE=1 SV=3 - [SARNP_MOUSE]                                 | 25.24 | 1 | 4  | 4  | 22  | 1.04 | 0.94 | 0.87 | 0.98 | 0.90 | 1.23 | 1.19 | 1.22 | 1.19 | 1.04 | 0.99 | 1.04 | 1.01 | 23.52  | 6.65 |
| Q91WG2   | Rab GTPase-binding effector protein 2 OS=Mus musculus GN=Rabep2 PE=2 SV=3 - [RABE2_MOUSE]                                  | 35.56 | 5 | 16 | 16 | 39  | 0.96 | 0.92 | 0.97 | 0.91 | 0.94 | 1.18 | 1.19 | 1.22 | 1.25 | 1.06 | 1.12 | 1.02 | 1.06 | 62.09  | 4.89 |
| Q5SRX1   | TOM1-like protein 2 OS=Mus musculus GN=Tom1l2 PE=1 SV=1 - [TM1L2_MOUSE]                                                    | 48.13 | 7 | 1  | 18 | 142 | 1.03 | 0.78 | 0.75 | 0.87 | 0.84 | 1.23 | 1.18 | 1.22 | 1.18 | 1.09 | 1.05 | 1.05 | 1.02 | 55.63  | 4.82 |
| Q8VDY9   | Caspase activity and apoptosis inhibitor 1 OS=Mus musculus GN=Caap1 PE=1 SV=2 - [CAAP1_MOUSE]                              | 25.28 | 1 | 5  | 5  | 12  | 1.04 | 0.77 | 0.79 | 1.03 | 0.93 | 1.25 | 1.22 | 1.22 | 1.17 | 1.13 | 1.16 | 1.02 | 0.94 | 37.80  | 4.72 |
| Q9JM96   | Cdc42 effector protein 4 OS=Mus musculus GN=Cdc42ep4 PE=1 SV=1 - [BORG4_MOUSE]                                             | 52.44 | 3 | 12 | 12 | 60  | 1.07 | 0.96 | 0.90 | 0.98 | 0.92 | 1.27 | 1.18 | 1.22 | 1.15 | 1.20 | 1.14 | 1.04 | 0.95 | 37.85  | 5.36 |
| Q80ZX8-2 | Isoform 2 of Sperm-associated antigen 1 OS=Mus musculus GN=Spag1 - [SPAG1_MOUSE]                                           | 2.65  | 3 | 1  | 1  | 2   | 1.12 | 1.03 | 0.92 | 1.06 | 0.95 | 1.15 | 1.02 | 1.22 | 1.09 | 1.40 | 1.25 | 1.23 | 1.10 | 58.47  | 5.78 |
| Q61074   | Protein phosphatase 1G OS=Mus musculus GN=Ppm1g PE=2 SV=3 - [PPM1G_MOUSE]                                                  | 33.58 | 1 | 13 | 13 | 37  | 0.99 | 0.92 | 0.96 | 0.97 | 0.91 | 1.32 | 1.32 | 1.22 | 1.16 | 1.07 | 1.09 | 1.04 | 1.07 | 58.69  | 4.39 |
| Q9WTP7   | GTP:AMP phosphotransferase AK3, mitochondrial OS=Mus musculus GN=Ak3 PE=1 SV=3 - [KAD3_MOUSE]                              | 47.58 | 2 | 11 | 11 | 29  | 0.97 | 0.90 | 0.93 | 1.03 | 1.07 | 1.19 | 1.24 | 1.22 | 1.21 | 1.21 | 1.20 | 1.07 | 1.08 | 25.41  | 8.84 |
| D3Z3M7   | CAP-Gly domain-containing linker protein 1 OS=Mus musculus GN=Clip1 PE=2 SV=1 - [D3Z3M7_MOUSE]                             | 59.24 | 3 | 4  | 78 | 345 | 1.26 | 0.71 | 0.66 | 1.04 | 0.86 | 1.22 | 1.02 | 1.22 | 0.94 | 1.14 | 0.90 | 1.14 | 0.93 | 147.91 | 5.31 |
| Q3U898   | Myeloma-overexpressed gene 2 protein homolog OS=Mus musculus GN=Myeov2 PE=2 SV=1 - [MYOV2_MOUSE]                           | 35.09 | 2 | 1  | 1  | 15  | 1.07 | 0.94 | 0.79 | 0.87 | 0.83 | 1.45 | 1.26 | 1.22 | 1.16 | 1.22 | 0.98 | 1.17 | 1.15 | 6.19   | 3.83 |
| Q3U1F9   | Phosphoprotein associated with glycosphingolipid-enriched microdomains 1 OS=Mus musculus GN=Pag1 PE=1 SV=2 - [PHAG1_MOUSE] | 39.86 | 1 | 10 | 10 | 29  | 1.01 | 1.06 | 1.20 | 0.95 | 0.94 | 1.19 | 1.19 | 1.22 | 1.22 | 1.18 | 1.12 | 1.05 | 1.08 | 46.52  | 4.81 |

|        |                                                                                                                                    |       |   |    |    |     |      |      |      |      |      |      |      |      |      |      |      |      |      |        |      |
|--------|------------------------------------------------------------------------------------------------------------------------------------|-------|---|----|----|-----|------|------|------|------|------|------|------|------|------|------|------|------|------|--------|------|
| E9QP59 | Inner nuclear membrane protein<br>Man1 OS=Mus musculus GN=Lemd3 PE=2 SV=1 - [E9QP59_MOUSE]                                         | 9.80  | 4 | 5  | 5  | 10  | 1.01 | 1.35 | 1.39 | 1.00 | 0.93 | 1.13 | 1.08 | 1.22 | 1.20 | 1.16 | 1.13 | 0.98 | 0.95 | 100.10 | 7.55 |
| D3Z7E6 | Platelet-activating factor acetylhydrolase IB subunit gamma OS=Mus musculus GN=Pafah1b3 PE=2 SV=1 - [D3Z7E6_MOUSE]                 | 16.11 | 4 | 3  | 3  | 5   | 1.21 | 1.07 | 1.00 | 1.01 | 1.02 | 1.23 | 1.11 | 1.22 | 1.14 | 1.32 | 1.19 | 1.33 | 1.29 | 20.14  | 7.75 |
| A2AHG0 | Leucine zipper putative tumor suppressor 3 OS=Mus musculus GN=Lts3 PE=2 SV=1 - [LZTS3_MOUSE]                                       | 29.86 | 3 | 14 | 15 | 49  | 1.00 | 1.05 | 1.06 | 0.94 | 0.98 | 1.07 | 1.09 | 1.22 | 1.21 | 1.04 | 1.08 | 1.04 | 1.07 | 74.94  | 6.99 |
| P55821 | Stathmin-2 OS=Mus musculus GN=Stmn2 PE=1 SV=1 - [STMN2_MOUSE]                                                                      | 21.79 | 1 | 3  | 6  | 103 | 0.94 | 0.87 | 0.97 | 0.96 | 1.00 | 1.26 | 1.23 | 1.22 | 1.27 | 1.26 | 1.25 | 1.19 | 1.28 | 20.81  | 8.32 |
| Q80WT0 | Junctophilin-4 OS=Mus musculus GN=Jph4 PE=2 SV=1 - [JPH4_MOUSE]                                                                    | 7.96  | 2 | 4  | 4  | 7   | 0.96 | 1.05 | 1.09 | 1.02 | 1.02 | 1.18 | 1.22 | 1.22 | 1.22 | 1.19 | 1.20 | 1.11 | 1.11 | 65.96  | 6.71 |
| Q8JZM4 | Delta and Notch-like epidermal growth factor-related receptor OS=Mus musculus GN=Dner PE=1 SV=1 - [DNER_MOUSE]                     | 1.90  | 1 | 1  | 1  | 1   | 1.01 | 1.03 | 1.02 | 0.86 | 0.86 | 1.01 | 0.99 | 1.22 | 1.21 | 1.23 | 1.22 | 0.97 | 0.97 | 78.69  | 5.10 |
| Q9R0P4 | Small acidic protein OS=Mus musculus GN=Smap PE=1 SV=1 - [SMAP_MOUSE]                                                              | 26.52 | 3 | 5  | 5  | 140 | 1.03 | 0.91 | 0.92 | 1.02 | 0.97 | 1.13 | 1.10 | 1.22 | 1.14 | 0.98 | 1.02 | 1.08 | 1.06 | 20.03  | 4.82 |
| Q9CRB9 | Coiled-coil-helix-coiled-coil-helix domain-containing protein 3, mitochondrial OS=Mus musculus GN=Chchd3 PE=1 SV=1 - [CHCH3_MOUSE] | 40.09 | 3 | 2  | 12 | 132 | 1.00 | 0.84 | 0.85 | 0.98 | 0.97 | 1.24 | 1.27 | 1.22 | 1.24 | 1.20 | 1.17 | 1.08 | 1.12 | 26.32  | 8.37 |
| Q9ERS8 | Testican-2 OS=Mus musculus GN=Spock2 PE=2 SV=1 - [TICN2_MOUSE]                                                                     | 40.43 | 2 | 14 | 14 | 46  | 1.11 | 0.85 | 0.78 | 1.00 | 0.91 | 1.22 | 1.08 | 1.22 | 1.12 | 1.11 | 1.04 | 1.03 | 0.98 | 46.83  | 4.87 |
| O70146 | Dual specificity testis-specific protein kinase 1 OS=Mus musculus GN=Tek1 PE=2 SV=3 - [TESK1_MOUSE]                                | 5.10  | 1 | 2  | 2  | 4   | 1.00 | 1.09 | 1.09 | 1.15 | 1.15 | 1.05 | 1.05 | 1.22 | 1.22 | 1.26 | 1.26 | 1.29 | 1.29 | 68.01  | 8.06 |
| Q9CQR2 | 40S ribosomal protein S21 OS=Mus musculus GN=Rps21 PE=2 SV=1 - [RS21_MOUSE]                                                        | 40.96 | 1 | 4  | 4  | 41  | 1.03 | 1.06 | 1.05 | 0.91 | 0.89 | 1.11 | 1.13 | 1.22 | 1.25 | 1.14 | 1.10 | 1.20 | 1.16 | 9.14   | 8.51 |
| Q8C3W1 | Uncharacterized protein C1orf198 homolog OS=Mus musculus PE=1 SV=1 - [CA198_MOUSE]                                                 | 53.42 | 1 | 12 | 12 | 52  | 1.14 | 1.02 | 0.84 | 0.99 | 0.87 | 1.21 | 1.00 | 1.23 | 1.07 | 1.20 | 1.06 | 1.16 | 1.04 | 35.29  | 5.24 |

|          |                                                                                                           |       |   |    |    |    |      |      |      |      |      |      |      |      |      |      |      |      |      |        |       |
|----------|-----------------------------------------------------------------------------------------------------------|-------|---|----|----|----|------|------|------|------|------|------|------|------|------|------|------|------|------|--------|-------|
| E9Q9A5   | Bifunctional polynucleotide phosphatase/kinase OS=Mus musculus GN=Pnkp PE=2 SV=1 [E9Q9A5_MOUSE]           | 2.26  | 4 | 1  | 1  | 2  | 0.94 | 1.61 | 1.70 | 1.17 | 1.24 | 0.99 | 1.04 | 1.23 | 1.29 | 0.99 | 1.05 | 1.12 | 1.19 | 53.28  | 7.39  |
| Q9JL04   | Formin-2 OS=Mus musculus GN=Fmn2 PE=1 SV=2 [FMN2_MOUSE]                                                   | 11.15 | 1 | 10 | 10 | 26 | 1.01 | 0.99 | 1.00 | 0.96 | 0.90 | 1.24 | 1.14 | 1.23 | 1.23 | 1.17 | 1.11 | 1.18 | 1.16 | 167.28 | 5.48  |
| Q3UZ39-2 | Isoform 2 of Leucine-rich repeat flightless-interacting protein 1 OS=Mus musculus GN=Lrrfp1 [LRRF1_MOUSE] | 38.22 | 3 | 9  | 23 | 85 | 1.02 | 0.90 | 0.86 | 0.95 | 0.97 | 1.18 | 1.15 | 1.23 | 1.16 | 1.04 | 1.05 | 1.00 | 0.94 | 71.26  | 6.04  |
| D3Z5R4   | WAS/WASL-interacting protein family member 3 OS=Mus musculus GN=Wipf3 PE=4 SV=1 [D3Z5R4_MOUSE]            | 57.46 | 2 | 1  | 17 | 84 | 1.04 | 1.06 | 1.02 | 0.97 | 0.93 | 1.17 | 1.12 | 1.23 | 1.17 | 1.22 | 1.17 | 1.06 | 1.03 | 45.11  | 10.84 |
| Q8R4R6   | Nucleoporin NUP53 OS=Mus musculus GN=Nup35 PE=1 SV=2 [NUP53_MOUSE]                                        | 23.69 | 2 | 5  | 5  | 11 | 0.94 | 0.87 | 0.92 | 0.96 | 0.99 | 1.09 | 1.19 | 1.23 | 1.21 | 0.95 | 1.05 | 1.10 | 1.08 | 34.76  | 9.25  |
| Q0VF62   | Bcas3 protein OS=Mus musculus GN=Bcas3 PE=2 SV=1 [Q0VF62_MOUSE]                                           | 14.13 | 5 | 1  | 10 | 31 | 1.01 | 1.01 | 0.99 | 0.92 | 0.90 | 1.29 | 1.27 | 1.23 | 1.20 | 1.13 | 1.11 | 1.04 | 1.03 | 99.40  | 6.64  |
| G3UW94   | MCG14259, isoform CRA_b OS=Mus musculus GN=U2af1 PE=4 SV=1 [G3UW94_MOUSE]                                 | 27.62 | 2 | 4  | 5  | 12 | 1.01 | 1.02 | 1.01 | 1.14 | 1.09 | 1.24 | 1.22 | 1.23 | 1.22 | 1.17 | 1.16 | 1.11 | 1.13 | 27.81  | 8.68  |
| Q7TNS5   | Protein B630019K06Rik OS=Mus musculus GN=B630019K06Rik PE=2 SV=1 [Q7TNS5_MOUSE]                           | 10.21 | 1 | 2  | 2  | 4  | 1.34 | 1.29 | 0.96 | 1.03 | 0.77 | 1.23 | 0.92 | 1.23 | 0.91 | 1.20 | 0.89 | 1.53 | 1.15 | 34.84  | 6.65  |
| Q8CFE6   | Sodium-coupled neutral amino acid transporter 2 OS=Mus musculus GN=Slc38a2 PE=1 SV=1 [S38A2_MOUSE]        | 4.17  | 1 | 1  | 1  | 2  | 0.92 | 1.10 | 1.19 | 1.10 | 1.20 | 0.85 | 0.92 | 1.23 | 1.33 | 0.86 | 0.94 | 1.14 | 1.24 | 55.47  | 7.94  |
| Q8BG30   | Negative elongation factor A OS=Mus musculus GN=Nelfa PE=1 SV=1 [NELFA_MOUSE]                             | 3.96  | 1 | 1  | 1  | 4  | 1.15 | 1.23 | 1.07 | 1.11 | 0.97 | 1.30 | 1.13 | 1.23 | 1.07 | 1.24 | 1.08 | 1.09 | 0.95 | 57.55  | 9.11  |
| Q3TIV5   | Zinc finger CCCH domain-containing protein 15 OS=Mus musculus GN=Zc3h15 PE=1 SV=2 [ZC3HF_MOUSE]           | 41.78 | 3 | 18 | 18 | 55 | 1.08 | 0.96 | 0.84 | 1.05 | 0.95 | 1.21 | 1.10 | 1.23 | 1.13 | 1.15 | 1.06 | 1.01 | 0.93 | 48.30  | 5.30  |

|        |                                                                                                                                      |       |   |    |    |    |      |      |      |      |      |      |      |      |      |      |      |      |      |        |      |
|--------|--------------------------------------------------------------------------------------------------------------------------------------|-------|---|----|----|----|------|------|------|------|------|------|------|------|------|------|------|------|------|--------|------|
| Q99PM3 | Transcription initiation factor IIA subunit 1<br>OS=Mus musculus<br>GN=Grt2a1 PE=2<br>SV=2 -<br>[TF2AA_MOUSE]                        | 6.88  | 3 | 3  | 3  | 10 | 1.00 | 1.07 | 1.05 | 0.98 | 1.03 | 1.19 | 1.19 | 1.23 | 1.18 | 1.19 | 1.20 | 1.07 | 1.11 | 41.59  | 4.55 |
| Q9R022 | DnaJ homolog subfamily C member 12<br>OS=Mus musculus<br>GN=Dnajc12 PE=2<br>SV=1 -<br>[DJC12_MOUSE]                                  | 19.19 | 2 | 3  | 3  | 9  | 1.19 | 1.04 | 0.88 | 1.02 | 0.83 | 1.28 | 1.13 | 1.23 | 1.03 | 1.33 | 1.21 | 1.36 | 1.14 | 22.84  | 6.15 |
| Q9D8L5 | Coiled-coil domain-containing protein 91<br>OS=Mus musculus<br>GN=Ccdc91 PE=2<br>SV=2 -<br>[CCD91_MOUSE]                             | 29.19 | 2 | 16 | 16 | 28 | 1.16 | 0.95 | 0.89 | 0.88 | 0.79 | 1.15 | 1.02 | 1.23 | 0.97 | 1.14 | 1.00 | 1.13 | 1.08 | 49.98  | 5.07 |
| D3Z5I9 | RNA-binding protein 33<br>OS=Mus musculus<br>GN=Rbm33 PE=2<br>SV=1 -<br>[D3Z5I9_MOUSE]                                               | 8.73  | 4 | 6  | 7  | 32 | 1.01 | 0.86 | 0.91 | 1.03 | 1.02 | 1.23 | 1.22 | 1.23 | 1.23 | 1.04 | 1.10 | 1.06 | 1.04 | 132.74 | 6.87 |
| F6TWX0 | Nuclear transcription factor Y subunit alpha (Fragment)<br>OS=Mus musculus<br>GN=Nfy PE=4<br>SV=1 -<br>[F6TWX0_MOUSE]                | 9.13  | 6 | 1  | 1  | 2  | 1.11 | 1.12 | 1.01 | 1.41 | 1.27 | 1.50 | 1.34 | 1.23 | 1.10 | 1.44 | 1.29 | 1.24 | 1.12 | 22.74  | 9.63 |
| Q92IK9 | B-cell CLL/lymphoma 7 protein family member B<br>OS=Mus musculus<br>GN=Bcl7b PE=1<br>SV=1 -<br>[BCL7B_MOUSE]                         | 41.09 | 4 | 4  | 6  | 13 | 0.85 | 0.82 | 0.96 | 0.92 | 1.15 | 0.99 | 1.36 | 1.23 | 1.44 | 1.11 | 1.32 | 0.92 | 1.16 | 22.22  | 4.75 |
| G3X9I5 | LysM and putative peptidoglycan-binding domain-containing protein 2<br>OS=Mus musculus<br>GN=Lysmd2 PE=4<br>SV=1 -<br>[G3X9I5_MOUSE] | 33.49 | 3 | 5  | 6  | 14 | 1.08 | 1.07 | 1.01 | 0.96 | 0.86 | 1.28 | 1.14 | 1.23 | 1.10 | 1.07 | 0.97 | 1.07 | 0.98 | 23.58  | 5.52 |
| Q62422 | Osteoclast-stimulating factor 1<br>OS=Mus musculus<br>GN=Ostf1 PE=1<br>SV=2 -<br>[OSTF1_MOUSE]                                       | 29.77 | 1 | 4  | 4  | 11 | 0.97 | 0.69 | 0.76 | 0.72 | 0.80 | 1.07 | 1.09 | 1.23 | 1.22 | 1.16 | 1.16 | 0.84 | 0.96 | 23.77  | 5.68 |
| A2A723 | Mannosyl-oligosaccharide 1,2-alpha-mannosidase 1B (Fragment)<br>OS=Mus musculus<br>GN=Man1a2 PE=2<br>SV=1 -<br>[A2A723_MOUSE]        | 5.69  | 3 | 1  | 1  | 1  | 1.65 | 1.61 | 0.97 | 0.62 | 0.37 | 1.28 | 0.77 | 1.23 | 0.74 | 1.22 | 0.74 | 1.09 | 0.66 | 28.13  | 8.28 |
| Q9JK92 | Heat shock protein beta-8<br>OS=Mus musculus<br>GN=Hspb8 PE=1<br>SV=1 -<br>[HSPB8_MOUSE]                                             | 9.18  | 1 | 2  | 2  | 3  | 1.24 | 1.39 | 1.12 | 1.04 | 0.84 | 1.17 | 0.94 | 1.23 | 0.99 | 1.27 | 1.03 | 1.23 | 0.99 | 21.52  | 5.02 |



|        |                                                                                                                                       |       |   |    |    |     |      |      |      |      |      |      |      |      |      |      |      |      |      |        |       |
|--------|---------------------------------------------------------------------------------------------------------------------------------------|-------|---|----|----|-----|------|------|------|------|------|------|------|------|------|------|------|------|------|--------|-------|
| P97822 | Acidic leucine-rich nuclear phosphoprotein 32 family member E<br>OS=Mus musculus<br>GN=Amp32e PE=1<br>SV=2 -<br>[AN32E_MOUSE]         | 53.08 | 7 | 8  | 8  | 52  | 0.98 | 0.89 | 0.92 | 0.88 | 0.95 | 1.25 | 1.26 | 1.23 | 1.25 | 1.17 | 1.20 | 1.02 | 1.07 | 29.60  | 3.88  |
| O88703 | Potassium/sodium hyperpolarization-activated cyclic nucleotide-gated channel 2 OS=Mus musculus GN=Hcn2<br>PE=1 SV=1 -<br>[HCN2_MOUSE] | 9.39  | 3 | 4  | 5  | 31  | 1.10 | 1.04 | 0.98 | 0.99 | 0.88 | 1.11 | 0.92 | 1.23 | 0.98 | 1.03 | 0.98 | 1.00 | 0.86 | 94.66  | 8.73  |
| Q8R1F0 | Leydig cell tumor 10 kDa protein homolog<br>OS=Mus musculus<br>GN=D8Erd738e PE=2<br>SV=1 -<br>[L10K_MOUSE]                            | 9.57  | 1 | 1  | 1  | 3   | 1.16 | 0.92 | 0.79 | 1.12 | 0.97 | 1.24 | 1.07 | 1.23 | 1.05 | 1.17 | 1.01 | 1.01 | 0.87 | 10.19  | 11.63 |
| Q9DC19 | 39S ribosomal protein L32, mitochondrial<br>OS=Mus musculus<br>GN=Mrpl32 PE=2<br>SV=1 -<br>[RM32_MOUSE]                               | 21.93 | 1 | 3  | 3  | 5   | 1.17 | 0.76 | 0.91 | 0.98 | 0.95 | 1.17 | 1.18 | 1.23 | 0.99 | 1.03 | 0.98 | 1.06 | 0.83 | 21.72  | 9.70  |
| Q3U3C9 | Isoform 4 of Genetic suppressor element 1<br>OS=Mus musculus<br>GN=Gse1 -<br>[GSE1_MOUSE]                                             | 3.74  | 4 | 2  | 3  | 4   | 1.15 | 1.20 | 1.05 | 1.10 | 0.96 | 1.06 | 0.92 | 1.23 | 1.07 | 0.82 | 0.71 | 1.06 | 0.93 | 132.22 | 7.52  |
| O70481 | E3 ubiquitin-protein ligase UBR1 OS=Mus musculus GN=Ubr1<br>PE=1 SV=2 -<br>[UBR1_MOUSE]                                               | 1.76  | 1 | 2  | 2  | 3   | 1.15 | 1.29 | 1.12 | 1.16 | 1.01 | 1.21 | 1.04 | 1.23 | 1.06 | 1.30 | 1.13 | 1.20 | 1.04 | 200.11 | 6.05  |
| P19246 | Neurofilament heavy polypeptide OS=Mus musculus GN=Nefh<br>PE=1 SV=3 -<br>[NFH_MOUSE]                                                 | 35.87 | 1 | 36 | 39 | 458 | 0.91 | 0.89 | 1.02 | 0.87 | 0.94 | 1.19 | 1.30 | 1.23 | 1.35 | 1.06 | 1.18 | 0.98 | 1.06 | 116.92 | 5.81  |
| F6X4L9 | 2-methoxy-6-polyprenyl-1,4-benzoquinol methylase, mitochondrial (Fragment) OS=Mus musculus GN=Coq5<br>PE=4 SV=1 -<br>[F6X4L9_MOUSE]   | 8.15  | 2 | 1  | 1  | 2   | 1.17 | 1.57 | 1.34 | 1.14 | 0.97 | 1.17 | 0.99 | 1.23 | 1.04 | 1.33 | 1.13 | 1.40 | 1.20 | 15.26  | 5.82  |
| D6RIJ4 | Nuclear autoantigen Sp-100 OS=Mus musculus GN=Sp100 PE=2<br>SV=1 -<br>[D6RIJ4_MOUSE]                                                  | 4.93  | 7 | 1  | 1  | 1   | 0.84 | 0.95 | 1.12 | 0.82 | 0.97 | 1.07 | 1.27 | 1.23 | 1.45 | 1.08 | 1.29 | 0.89 | 1.06 | 34.39  | 4.97  |
| Q8BH80 | Vesicle-associated membrane protein, associated protein B and C OS=Mus musculus GN=Vapb<br>PE=2 SV=1 -<br>[Q8BH80_MOUSE]              | 39.92 | 2 | 7  | 8  | 70  | 0.98 | 0.70 | 0.71 | 0.95 | 0.95 | 1.22 | 1.28 | 1.23 | 1.28 | 1.15 | 1.19 | 1.01 | 1.05 | 26.90  | 7.78  |

|          |                                                                                            |       |   |    |    |     |      |      |      |      |      |      |      |      |      |      |      |      |      |        |       |
|----------|--------------------------------------------------------------------------------------------|-------|---|----|----|-----|------|------|------|------|------|------|------|------|------|------|------|------|------|--------|-------|
| B1ATD5   | MCG9626, isoform CRA_b OS=Mus musculus GN=Mttr3 PE=4 SV=1 - [B1ATD5_MOUSE]                 | 3.02  | 6 | 3  | 3  | 4   | 1.08 | 1.23 | 1.20 | 1.00 | 0.94 | 1.05 | 0.96 | 1.23 | 1.13 | 1.14 | 1.05 | 1.35 | 1.29 | 129.60 | 6.07  |
| P24788   | Cyclin-dependent kinase 11B OS=Mus musculus GN=Cdk11b PE=1 SV=2 - [CD11B_MOUSE]            | 6.63  | 3 | 5  | 5  | 9   | 1.04 | 0.84 | 0.87 | 1.00 | 0.98 | 1.22 | 1.15 | 1.23 | 1.22 | 1.11 | 1.07 | 1.00 | 0.99 | 91.46  | 5.39  |
| Q80X50-2 | Isoform 2 of Ubiquitin-associated protein 2-like OS=Mus musculus GN=Ubp2l - [UBP2L_MOUSE]  | 40.63 | 3 | 2  | 25 | 79  | 0.81 | 0.87 | 1.07 | 0.89 | 1.09 | 1.15 | 1.42 | 1.23 | 1.51 | 1.12 | 1.39 | 0.92 | 1.14 | 107.18 | 7.11  |
| O09044   | Synaptosomal-associated protein 23 OS=Mus musculus GN=Snap23 PE=1 SV=1 - [SNP23_MOUSE]     | 56.67 | 5 | 7  | 8  | 32  | 1.00 | 1.02 | 1.04 | 0.95 | 0.95 | 1.05 | 1.08 | 1.23 | 1.23 | 1.08 | 1.16 | 1.14 | 1.06 | 23.25  | 4.98  |
| Q9CQF0   | 39S ribosomal protein L11, mitochondrial OS=Mus musculus GN=Mrp11 PE=2 SV=1 - [RM11_MOUSE] | 19.27 | 1 | 3  | 3  | 7   | 0.95 | 0.72 | 0.75 | 0.91 | 0.96 | 1.29 | 1.46 | 1.23 | 1.39 | 1.26 | 1.35 | 1.09 | 1.15 | 20.67  | 9.73  |
| Q99N94   | 39S ribosomal protein L9, mitochondrial OS=Mus musculus GN=Mrp9 PE=2 SV=2 - [RM09_MOUSE]   | 6.42  | 2 | 1  | 1  | 2   | 0.99 | 1.13 | 1.14 | 1.00 | 1.01 | 1.09 | 1.10 | 1.23 | 1.24 | 1.20 | 1.22 | 1.27 | 1.29 | 30.23  | 10.08 |
| Q62170   | P-selectin glycoprotein ligand 1 OS=Mus musculus GN=Selplg PE=1 SV=2 - [SELP_MOUSE]        | 4.79  | 2 | 1  | 1  | 1   | 0.97 | 0.98 | 1.01 | 1.00 | 1.03 | 1.12 | 1.15 | 1.23 | 1.26 | 1.00 | 1.02 | 1.00 | 1.03 | 41.82  | 4.44  |
| P47212   | Galanin peptides OS=Mus musculus GN=Gal PE=2 SV=1 - [GALA_MOUSE]                           | 17.74 | 1 | 1  | 1  | 3   | 1.09 | 0.96 | 0.88 | 0.66 | 0.61 | 1.05 | 0.96 | 1.23 | 1.13 | 1.29 | 1.19 | 1.16 | 1.07 | 13.46  | 6.54  |
| Q8VD04   | GRIP1-associated protein 1 OS=Mus musculus GN=Gripap1 PE=1 SV=1 - [GRAP1_MOUSE]            | 67.37 | 5 | 1  | 50 | 315 | 1.01 | 0.65 | 0.64 | 0.93 | 0.92 | 1.24 | 1.22 | 1.23 | 1.21 | 1.13 | 1.12 | 0.97 | 0.96 | 92.66  | 5.25  |
| O35326   | Serine/arginine-rich splicing factor 5 OS=Mus musculus GN=Srsf5 PE=1 SV=2 - [SRSF5_MOUSE]  | 29.37 | 5 | 7  | 9  | 35  | 1.07 | 0.83 | 0.80 | 0.98 | 0.95 | 1.19 | 1.11 | 1.23 | 1.10 | 1.09 | 0.96 | 0.99 | 0.93 | 30.87  | 11.56 |
| Q3U0V1   | Far upstream element-binding protein 2 OS=Mus musculus GN=Khsp PE=1 SV=2 - [FUBP2_MOUSE]   | 47.19 | 1 | 28 | 30 | 313 | 0.99 | 0.95 | 0.95 | 0.94 | 0.95 | 1.21 | 1.23 | 1.23 | 1.25 | 1.10 | 1.11 | 1.05 | 1.08 | 76.73  | 7.33  |
| E9Q3Q6   | CD166 antigen OS=Mus musculus GN=Alcam PE=2 SV=1 - [E9Q3Q6_MOUSE]                          | 38.42 | 5 | 15 | 15 | 60  | 1.13 | 0.94 | 0.88 | 1.08 | 0.91 | 1.27 | 1.11 | 1.23 | 1.02 | 1.24 | 1.06 | 1.26 | 1.03 | 63.63  | 7.27  |
| E9Q983   | Supervillin OS=Mus musculus GN=Svil PE=2 SV=1 - [E9Q983_MOUSE]                             | 1.98  | 4 | 2  | 2  | 6   | 1.05 | 1.18 | 1.12 | 1.04 | 1.03 | 1.18 | 1.02 | 1.23 | 1.06 | 1.22 | 1.16 | 1.10 | 1.09 | 198.41 | 6.55  |

|        |                                                                                                                          |       |   |    |    |     |      |      |      |      |      |      |      |      |      |      |      |      |      |        |      |
|--------|--------------------------------------------------------------------------------------------------------------------------|-------|---|----|----|-----|------|------|------|------|------|------|------|------|------|------|------|------|------|--------|------|
| P63024 | Vesicle-associated membrane protein 3<br>OS=Mus musculus<br>GN=Vamp3 PE=1<br>SV=1 -<br>[VAMP3_MOUSE]                     | 48.54 | 1 | 2  | 6  | 52  | 1.13 | 1.15 | 1.01 | 0.94 | 0.85 | 1.23 | 1.01 | 1.23 | 1.07 | 1.13 | 1.18 | 1.19 | 1.15 | 11.47  | 8.50 |
| Q61687 | Transcriptional regulator ATRX<br>OS=Mus musculus<br>GN=Atrx PE=1 SV=3 -<br>[ATRX_MOUSE]                                 | 9.33  | 8 | 16 | 16 | 43  | 0.96 | 0.98 | 0.99 | 1.02 | 1.06 | 1.28 | 1.29 | 1.23 | 1.28 | 1.10 | 1.17 | 1.03 | 1.09 | 278.41 | 6.68 |
| Q9JJC6 | RILP-like protein 1<br>OS=Mus musculus<br>GN=Rilpl1 PE=1<br>SV=1 -<br>[RIPL1_MOUSE]                                      | 59.85 | 1 | 17 | 17 | 70  | 1.04 | 1.09 | 1.06 | 0.93 | 0.95 | 1.16 | 1.16 | 1.23 | 1.26 | 1.13 | 1.10 | 0.94 | 1.06 | 47.29  | 5.16 |
| Q9D2M8 | Ubiquitin-conjugating enzyme E2 variant 2<br>OS=Mus musculus<br>GN=Ube2v2 PE=2<br>SV=4 -<br>[UB2V2_MOUSE]                | 51.03 | 8 | 2  | 6  | 80  | 1.08 | 1.20 | 1.12 | 1.05 | 0.93 | 1.17 | 1.13 | 1.23 | 1.11 | 1.09 | 0.98 | 1.11 | 1.00 | 16.36  | 8.09 |
| Q3TUE1 | Far upstream element-binding protein 1<br>OS=Mus musculus<br>GN=Fubp1 PE=2<br>SV=1 -<br>[Q3TUE1_MOUSE]                   | 48.29 | 1 | 2  | 23 | 238 | 1.03 | 0.94 | 0.86 | 0.94 | 0.90 | 1.18 | 1.10 | 1.23 | 1.16 | 1.16 | 1.11 | 1.02 | 0.99 | 67.40  | 7.61 |
| Q91VL8 | Telomeric repeat-binding factor 2-interacting protein 1<br>OS=Mus musculus<br>GN=Terf2ip PE=1<br>SV=1 -<br>[TE2IP_MOUSE] | 31.55 | 1 | 8  | 8  | 17  | 1.02 | 0.86 | 0.81 | 0.94 | 0.94 | 1.27 | 1.21 | 1.23 | 1.24 | 1.04 | 1.10 | 1.00 | 1.09 | 43.33  | 4.81 |
| Q6NXJ0 | Protein WWC2<br>OS=Mus musculus<br>GN=Wwc2 PE=2<br>SV=1 -<br>[WWC2_MOUSE]                                                | 2.11  | 1 | 2  | 2  | 2   | 1.10 | 1.28 | 1.15 | 1.02 | 0.92 | 1.25 | 1.12 | 1.23 | 1.11 | 1.22 | 1.10 | 1.19 | 1.08 | 132.54 | 5.71 |
| O88602 | Voltage-dependent calcium channel gamma-2 subunit<br>OS=Mus musculus<br>GN=Cacng2 PE=1<br>SV=1 -<br>[CCG2_MOUSE]         | 14.55 | 1 | 2  | 4  | 10  | 1.00 | 1.62 | 1.68 | 1.00 | 1.00 | 1.08 | 1.18 | 1.23 | 1.23 | 0.95 | 0.95 | 1.04 | 1.08 | 35.87  | 8.98 |
| Q9D0B0 | Serine/arginine-rich splicing factor 9<br>OS=Mus musculus<br>GN=Srsf9 PE=1 SV=1 -<br>[SRSF9_MOUSE]                       | 19.37 | 1 | 2  | 4  | 8   | 1.00 | 0.78 | 0.78 | 0.86 | 0.86 | 1.02 | 1.01 | 1.23 | 1.23 | 1.04 | 1.04 | 0.94 | 0.94 | 25.65  | 8.65 |
| Q3UH68 | LIM and calponin homology domains-containing protein 1<br>OS=Mus musculus<br>GN=Limch1 PE=1<br>SV=2 -<br>[LIMC1_MOUSE]   | 40.59 | 9 | 30 | 30 | 77  | 1.03 | 1.02 | 0.98 | 0.93 | 0.89 | 1.22 | 1.17 | 1.23 | 1.19 | 1.14 | 1.12 | 1.12 | 1.03 | 118.12 | 5.48 |
| Q3U155 | Coiled-coil domain-containing protein 174<br>OS=Mus musculus<br>GN=Ccdc174 PE=2<br>SV=1 -<br>[CC174_MOUSE]               | 8.35  | 1 | 3  | 3  | 4   | 0.97 | 0.92 | 1.16 | 1.01 | 1.12 | 1.08 | 1.35 | 1.23 | 1.19 | 1.17 | 1.24 | 1.08 | 1.16 | 53.91  | 6.21 |

|          |                                                                                                           |       |   |    |    |     |      |      |      |      |      |      |      |      |      |      |      |      |      |        |       |
|----------|-----------------------------------------------------------------------------------------------------------|-------|---|----|----|-----|------|------|------|------|------|------|------|------|------|------|------|------|------|--------|-------|
| Q9QUK9   | MCGI5083 OS=Mus musculus GN=Try5 PE=2 SV=1 - [Q9QUK9_MOUSE]                                               | 12.20 | 3 | 1  | 2  | 8   | 0.95 | 0.85 | 0.90 | 0.82 | 0.86 | 1.12 | 1.18 | 1.23 | 1.30 | 1.08 | 1.14 | 1.09 | 1.15 | 26.26  | 5.30  |
| Q91X43   | SH3 domain-containing protein 19 OS=Mus musculus GN=Sh3d19 PE=1 SV=2 - [SH319_MOUSE]                      | 9.25  | 2 | 4  | 4  | 7   | 1.02 | 1.09 | 1.01 | 1.09 | 1.04 | 1.16 | 1.19 | 1.23 | 1.24 | 1.24 | 1.19 | 1.03 | 1.04 | 86.02  | 8.53  |
| P43274   | Histone H1.4 OS=Mus musculus GN=Hist1h1e PE=1 SV=2 - [H14_MOUSE]                                          | 39.73 | 3 | 3  | 13 | 80  | 1.09 | 0.86 | 0.77 | 0.97 | 1.00 | 1.10 | 0.96 | 1.23 | 1.07 | 1.15 | 1.07 | 1.03 | 0.95 | 21.96  | 11.11 |
| P62892   | 60S ribosomal protein L39 OS=Mus musculus GN=Rpl39 PE=2 SV=2 - [RL39_MOUSE]                               | 19.61 | 1 | 1  | 1  | 6   | 1.03 | 1.26 | 1.27 | 1.11 | 1.06 | 1.02 | 0.98 | 1.23 | 1.18 | 1.15 | 1.10 | 1.27 | 1.26 | 6.40   | 12.56 |
| Q3TUF7-2 | Isoform 3 of YEATS domain-containing protein 2 OS=Mus musculus GN=Yeats2 - [YETS2_MOUSE]                  | 1.33  | 2 | 1  | 1  | 1   | 0.93 | 0.45 | 0.49 | 0.82 | 0.88 | 1.27 | 1.36 | 1.23 | 1.32 | 1.02 | 1.10 | 0.82 | 0.88 | 142.91 | 9.10  |
| Q62481   | Vacuolar protein sorting-associated protein 72 homolog OS=Mus musculus GN=Vps72 PE=2 SV=2 - [VPS72_MOUSE] | 9.24  | 1 | 3  | 3  | 4   | 1.11 | 1.04 | 1.04 | 1.06 | 1.04 | 1.15 | 1.20 | 1.23 | 1.27 | 1.26 | 1.14 | 1.07 | 0.84 | 40.76  | 6.40  |
| Q8BYK5   | Isoform 4 of Phosphatase and actin regulator 3 OS=Mus musculus GN=Phactr3 - [PHAR3_MOUSE]                 | 16.22 | 5 | 8  | 8  | 18  | 1.10 | 1.08 | 1.04 | 1.09 | 0.97 | 1.25 | 1.14 | 1.23 | 1.12 | 1.18 | 1.08 | 1.14 | 1.09 | 58.58  | 9.14  |
| Q68EF6   | Brain-enriched guanylate kinase-associated protein OS=Mus musculus GN=Begain PE=1 SV=2 - [BEGIN_MOUSE]    | 60.00 | 2 | 28 | 28 | 93  | 0.98 | 0.94 | 0.99 | 0.98 | 0.96 | 1.12 | 1.18 | 1.23 | 1.28 | 1.08 | 1.11 | 1.02 | 1.09 | 65.27  | 5.87  |
| B0V2H4   | V-type proton ATPase subunit G 2 OS=Mus musculus GN=Atp6v1g2 PE=2 SV=1 - [B0V2H4_MOUSE]                   | 81.72 | 3 | 10 | 10 | 295 | 0.97 | 1.05 | 1.09 | 0.89 | 0.94 | 1.18 | 1.22 | 1.23 | 1.29 | 1.14 | 1.20 | 1.18 | 1.23 | 10.88  | 10.24 |
| Q91YQ3   | Cold shock domain-containing protein C2 OS=Mus musculus GN=Csdc2 PE=2 SV=2 - [CSDC2_MOUSE]                | 12.99 | 2 | 2  | 2  | 4   | 0.82 | 0.99 | 1.20 | 1.03 | 1.04 | 1.27 | 1.27 | 1.23 | 1.43 | 1.02 | 1.05 | 1.07 | 1.29 | 16.84  | 7.55  |
| A6H8H5   | Potassium voltage-gated channel subfamily B member 2 OS=Mus musculus GN=Kcnb2 PE=2 SV=2 - [KCNB2_MOUSE]   | 9.70  | 1 | 6  | 6  | 12  | 1.10 | 1.04 | 1.05 | 1.02 | 0.92 | 1.17 | 1.03 | 1.23 | 1.13 | 1.12 | 1.03 | 0.94 | 0.92 | 102.27 | 6.10  |

|        |                                                                                                                                  |       |   |    |    |    |      |      |      |      |      |      |      |      |      |      |      |      |      |        |      |
|--------|----------------------------------------------------------------------------------------------------------------------------------|-------|---|----|----|----|------|------|------|------|------|------|------|------|------|------|------|------|------|--------|------|
| Q8BHG2 | UPF0587 protein<br>C1orf123 homolog<br>OS=Mus musculus<br>PE=2 SV=1 -<br>[CA123_MOUSE]                                           | 75.00 | 9 | 9  | 9  | 51 | 1.03 | 0.89 | 0.81 | 0.90 | 0.90 | 1.17 | 1.16 | 1.23 | 1.18 | 1.03 | 1.00 | 0.99 | 0.94 | 18.01  | 5.12 |
| D3YYH0 | PEX5-related protein<br>OS=Mus musculus<br>GN=Pex5l PE=2 SV=1<br>- [D3YYH0_MOUSE]                                                | 39.59 | 7 | 18 | 18 | 47 | 0.97 | 1.08 | 1.13 | 1.00 | 1.08 | 1.07 | 1.14 | 1.23 | 1.29 | 1.00 | 1.08 | 0.96 | 1.04 | 65.80  | 5.22 |
| E9PV26 | Protein BC068157<br>OS=Mus musculus<br>GN=BC068157 PE=2<br>SV=1 -<br>[E9PV26_MOUSE]                                              | 20.04 | 3 | 14 | 14 | 56 | 1.08 | 1.00 | 0.98 | 0.97 | 0.92 | 1.19 | 1.12 | 1.23 | 1.15 | 1.10 | 1.03 | 1.10 | 1.02 | 110.62 | 9.98 |
| Q62384 | Zinc finger protein<br>ZPR1 OS=Mus<br>musculus GN=Znf259<br>PE=1 SV=1 -<br>[ZPR1_MOUSE]                                          | 38.34 | 3 | 13 | 13 | 25 | 1.01 | 0.98 | 0.95 | 0.84 | 0.87 | 1.11 | 1.13 | 1.23 | 1.30 | 1.09 | 1.11 | 1.01 | 1.04 | 50.68  | 4.78 |
| F6YMV1 | Angiotensin<br>(Fragment) OS=Mus<br>musculus GN=Amot<br>PE=4 SV=1 -<br>[F6YMV1_MOUSE]                                            | 24.85 | 5 | 10 | 12 | 32 | 1.11 | 0.97 | 0.89 | 1.01 | 0.88 | 1.30 | 1.13 | 1.24 | 1.13 | 1.21 | 1.09 | 1.10 | 0.99 | 75.68  | 7.94 |
| P60041 | Somatostatin OS=Mus<br>musculus GN=Sst<br>PE=2 SV=1 -<br>[SMS_MOUSE]                                                             | 37.93 | 1 | 2  | 2  | 7  | 1.18 | 1.26 | 1.07 | 1.22 | 0.95 | 1.33 | 1.06 | 1.24 | 1.04 | 1.25 | 1.05 | 1.20 | 1.17 | 12.74  | 5.52 |
| Q3UMU9 | Isoform 4 of Hepatoma-<br>derived growth factor-<br>related protein 2<br>OS=Mus musculus<br>GN=Hdgrfp2 -<br>[HDGR2_MOUSE]        | 17.72 | 4 | 9  | 11 | 27 | 1.15 | 1.18 | 0.96 | 1.00 | 0.91 | 1.06 | 0.94 | 1.24 | 1.07 | 1.13 | 1.04 | 1.05 | 1.02 | 68.49  | 9.00 |
| Q8R450 | Protein phosphatase 1<br>regulatory subunit 14C<br>OS=Mus musculus<br>GN=Ppp1r14c PE=1<br>SV=1 -<br>[PP14C_MOUSE]                | 22.56 | 1 | 2  | 2  | 7  | 0.99 | 0.87 | 0.87 | 0.94 | 0.95 | 1.08 | 1.08 | 1.24 | 1.14 | 1.04 | 1.04 | 1.10 | 0.98 | 17.74  | 5.27 |
| Q3UHD3 | Microtubule-associated<br>tumor suppressor<br>candidate 2 homolog<br>OS=Mus musculus<br>GN=Mtus2 PE=2<br>SV=1 -<br>[MTUS2_MOUSE] | 16.33 | 7 | 17 | 17 | 36 | 0.97 | 0.92 | 1.01 | 0.88 | 0.95 | 1.16 | 1.26 | 1.24 | 1.25 | 1.09 | 1.19 | 1.00 | 1.07 | 147.27 | 8.24 |
| Q3THK3 | General transcription<br>factor IIF subunit 1<br>OS=Mus musculus<br>GN=Gt2f1 PE=1<br>SV=2 -<br>[T2FA_MOUSE]                      | 24.41 | 1 | 10 | 10 | 20 | 1.09 | 1.04 | 1.01 | 1.09 | 1.02 | 1.19 | 1.03 | 1.24 | 1.13 | 1.30 | 1.15 | 1.15 | 1.07 | 57.21  | 7.01 |
| Q8BN59 | La-related protein 6<br>OS=Mus musculus<br>GN=Larp6 PE=1 SV=1<br>- [LARP6_MOUSE]                                                 | 5.89  | 1 | 2  | 2  | 3  | 1.12 | 1.23 | 1.09 | 1.10 | 0.98 | 1.07 | 0.95 | 1.24 | 1.10 | 1.05 | 0.94 | 1.91 | 1.71 | 54.84  | 7.90 |
| E9Q9H2 | Dnaj homolog<br>subfamily C member 2<br>OS=Mus musculus<br>GN=Dnajc2 PE=2<br>SV=1 -<br>[E9Q9H2_MOUSE]                            | 16.64 | 4 | 8  | 8  | 14 | 1.07 | 0.99 | 0.90 | 1.03 | 0.95 | 1.16 | 1.06 | 1.24 | 1.13 | 1.26 | 1.19 | 1.17 | 1.07 | 63.40  | 9.17 |

|          |                                                                                                                                          |       |   |    |    |     |      |      |      |      |      |      |      |      |      |      |      |      |      |        |       |
|----------|------------------------------------------------------------------------------------------------------------------------------------------|-------|---|----|----|-----|------|------|------|------|------|------|------|------|------|------|------|------|------|--------|-------|
| E9Q7G0   | Protein Numa1<br>OS=Mus musculus<br>GN=Numa1 PE=2<br>SV=1 -<br>[E9Q7G0_MOUSE]                                                            | 22.30 | 1 | 19 | 33 | 66  | 0.96 | 0.99 | 0.96 | 0.92 | 0.99 | 1.09 | 1.21 | 1.24 | 1.23 | 1.12 | 1.13 | 1.08 | 1.05 | 235.49 | 5.87  |
| O88665   | Bromodomain-<br>containing protein 7<br>OS=Mus musculus<br>GN=Brd7 PE=1 SV=1 -<br>[BRD7_MOUSE]                                           | 7.22  | 1 | 3  | 3  | 8   | 1.05 | 1.19 | 1.13 | 0.96 | 0.99 | 1.09 | 1.09 | 1.24 | 1.08 | 1.15 | 1.08 | 1.21 | 1.13 | 73.95  | 6.38  |
| Q8BK30   | NADH dehydrogenase<br>[ubiquinone]<br>flavoprotein 3,<br>mitochondrial OS=Mus<br>musculus GN=Ndufv3<br>PE=2 SV=1 -<br>[NDUV3_MOUSE]      | 46.15 | 1 | 2  | 4  | 73  | 0.61 | 0.70 | 1.13 | 0.82 | 1.33 | 1.05 | 1.70 | 1.24 | 2.06 | 1.07 | 1.78 | 0.76 | 1.14 | 11.81  | 9.35  |
| F7DBT7   | Regulatory factor X-<br>associated protein<br>OS=Mus musculus<br>GN=Rfxap PE=2<br>SV=1 -<br>[F7DBT7_MOUSE]                               | 11.26 | 2 | 2  | 2  | 4   | 1.16 | 0.96 | 0.82 | 1.05 | 0.90 | 1.13 | 0.97 | 1.24 | 1.06 | 1.23 | 1.06 | 1.26 | 1.08 | 24.74  | 5.41  |
| Q91VC9   | Growth hormone-<br>inducible<br>transmembrane protein<br>OS=Mus musculus<br>GN=Ghitm PE=2<br>SV=1 -<br>[GHITM_MOUSE]                     | 3.18  | 1 | 1  | 1  | 2   | 1.11 | 1.43 | 1.28 | 1.02 | 0.92 | 1.09 | 0.97 | 1.24 | 1.11 | 1.30 | 1.17 | 1.45 | 1.31 | 37.25  | 9.80  |
| Q99L02   | PAXIP1-associated<br>glutamate-rich protein<br>1 OS=Mus musculus<br>GN=PAGR1 PE=1<br>SV=1 -<br>[PAGR1_MOUSE]                             | 20.55 | 2 | 4  | 4  | 13  | 0.95 | 1.09 | 1.02 | 0.92 | 0.98 | 1.09 | 1.03 | 1.24 | 1.25 | 1.04 | 0.98 | 1.01 | 0.95 | 27.71  | 4.56  |
| F84104-2 | Isoform Short of<br>Serine/arginine-rich<br>splicing factor 3<br>OS=Mus musculus<br>GN=Srsf3 -<br>[SRSF3_MOUSE]                          | 45.16 | 3 | 5  | 6  | 100 | 1.05 | 0.85 | 0.92 | 1.00 | 0.98 | 1.11 | 1.10 | 1.24 | 1.13 | 1.11 | 1.04 | 1.05 | 1.03 | 14.19  | 10.08 |
| P46467   | Vacuolar protein<br>sorting-associated<br>protein 4B OS=Mus<br>musculus GN=Vps4b<br>PE=1 SV=2 -<br>[VPS4B_MOUSE]                         | 16.22 | 1 | 5  | 6  | 7   | 0.99 | 0.99 | 0.95 | 1.11 | 1.06 | 1.16 | 1.11 | 1.24 | 1.18 | 1.02 | 1.04 | 0.93 | 0.97 | 49.39  | 7.11  |
| Q8K409   | DNA polymerase beta<br>OS=Mus musculus<br>GN=Polb PE=2 SV=3 -<br>[DPOLB_MOUSE]                                                           | 3.88  | 1 | 1  | 1  | 3   | 0.98 | 1.91 | 1.94 | 0.88 | 0.89 | 1.25 | 1.27 | 1.24 | 1.25 | 1.10 | 1.12 | 1.08 | 1.10 | 38.26  | 8.85  |
| Q9D715   | Phospholysine<br>phosphohistidine<br>inorganic<br>pyrophosphate<br>phosphatase OS=Mus<br>musculus GN=Lhpp<br>PE=2 SV=1 -<br>[LHPP_MOUSE] | 15.56 | 2 | 2  | 2  | 10  | 0.93 | 1.03 | 1.02 | 0.97 | 1.04 | 1.21 | 1.29 | 1.24 | 1.34 | 1.30 | 1.39 | 1.12 | 1.22 | 29.13  | 5.10  |
| P28667   | MARCKS-related<br>protein OS=Mus<br>musculus<br>GN=Marcks1 PE=1<br>SV=2 -<br>[MRP_MOUSE]                                                 | 52.50 | 1 | 6  | 6  | 67  | 1.23 | 1.00 | 0.78 | 1.02 | 0.80 | 1.31 | 1.06 | 1.24 | 0.98 | 1.15 | 0.88 | 1.52 | 1.08 | 20.15  | 4.61  |

|          |                                                                                                                               |       |   |    |    |     |      |      |      |      |      |      |      |      |      |      |      |      |      |        |       |
|----------|-------------------------------------------------------------------------------------------------------------------------------|-------|---|----|----|-----|------|------|------|------|------|------|------|------|------|------|------|------|------|--------|-------|
| Q05AH6-  | Isoform 2 of Uncharacterized protein C11orf84 homolog OS=Mus musculus - [CK084_MOUSE]                                         | 12.70 | 2 | 2  | 2  | 3   | 0.99 | 1.16 | 1.16 | 1.08 | 1.08 | 1.09 | 1.09 | 1.24 | 1.24 | 1.14 | 1.15 | 1.10 | 1.11 | 34.32  | 4.96  |
| Q3V0Q7   | Transmembrane protease serine 12 OS=Mus musculus GN=Tmpsr12 PE=2 SV=1 - [TMPSC_MOUSE]                                         | 5.65  | 1 | 1  | 1  | 1   | 0.78 | 0.88 | 1.13 | 0.66 | 0.85 | 1.33 | 1.69 | 1.24 | 1.58 | 1.01 | 1.30 | 0.64 | 0.83 | 36.89  | 6.67  |
| D3YYE1   | Acidic leucine-rich nuclear phosphoprotein 32 family member A (Fragment) OS=Mus musculus GN=Anp32a PE=2 SV=1 - [D3YYE1_MOUSE] | 57.07 | 6 | 9  | 12 | 145 | 1.00 | 0.90 | 0.87 | 0.93 | 0.93 | 1.19 | 1.20 | 1.24 | 1.17 | 1.16 | 1.10 | 1.05 | 1.05 | 22.94  | 4.37  |
| Q3ULB0   | Protein Rbm6 OS=Mus musculus GN=Rbm6 PE=2 SV=1 - [Q3ULB0_MOUSE]                                                               | 12.47 | 1 | 10 | 11 | 18  | 1.06 | 1.01 | 0.93 | 1.00 | 0.93 | 1.25 | 1.18 | 1.24 | 1.17 | 1.10 | 1.06 | 1.03 | 0.97 | 113.60 | 6.20  |
| A2RTL5   | Arginine/serine-rich coiled-coil protein 2 OS=Mus musculus GN=Rsrc2 PE=2 SV=1 - [RSRC2_MOUSE]                                 | 11.17 | 3 | 4  | 4  | 15  | 1.05 | 1.11 | 1.08 | 1.12 | 1.03 | 1.16 | 1.11 | 1.24 | 1.18 | 1.19 | 1.12 | 1.18 | 1.10 | 43.85  | 11.46 |
| O70209   | PDZ and LIM domain protein 3 OS=Mus musculus GN=Pdlm3 PE=1 SV=1 - [PDL3_MOUSE]                                                | 29.43 | 1 | 7  | 7  | 10  | 0.96 | 1.01 | 0.93 | 0.95 | 1.05 | 1.21 | 1.24 | 1.24 | 1.16 | 1.18 | 1.14 | 1.04 | 1.08 | 34.28  | 7.91  |
| Q8BH48   | Ubiquitin-associated protein 1 OS=Mus musculus GN=Ubp1 PE=1 SV=1 - [UBAP1_MOUSE]                                              | 37.45 | 3 | 13 | 14 | 27  | 1.03 | 0.93 | 0.87 | 0.94 | 0.92 | 1.20 | 1.18 | 1.24 | 1.17 | 1.11 | 1.08 | 1.01 | 1.08 | 54.99  | 5.07  |
| Q61048   | WW domain-binding protein 4 OS=Mus musculus GN=Wbp4 PE=1 SV=4 - [WBP4_MOUSE]                                                  | 14.63 | 1 | 4  | 4  | 7   | 1.07 | 0.98 | 0.91 | 0.97 | 0.94 | 1.15 | 1.04 | 1.24 | 1.15 | 1.14 | 1.02 | 0.91 | 0.85 | 42.11  | 7.36  |
| O35852   | Preprodynorphin (Fragment) OS=Mus musculus GN=Pdyn PE=2 SV=1 - [O35852_MOUSE]                                                 | 26.21 | 2 | 5  | 5  | 8   | 1.33 | 0.95 | 0.88 | 0.95 | 0.78 | 1.16 | 0.87 | 1.24 | 0.82 | 1.53 | 1.08 | 1.62 | 1.31 | 27.99  | 5.63  |
| Q9WV69   | Dematin OS=Mus musculus GN=Dmtn PE=1 SV=1 - [DEMA_MOUSE]                                                                      | 67.16 | 2 | 3  | 21 | 323 | 1.06 | 0.97 | 0.88 | 0.98 | 0.96 | 1.28 | 1.21 | 1.24 | 1.23 | 1.13 | 1.11 | 1.02 | 0.98 | 45.44  | 8.41  |
| Q5TLD5   | Unconventional prefoldin RPB5 interactor OS=Mus musculus GN=Uri1 PE=1 SV=2 - [RMP_MOUSE]                                      | 28.25 | 2 | 9  | 9  | 27  | 1.02 | 1.00 | 1.05 | 0.95 | 0.99 | 1.27 | 1.31 | 1.24 | 1.23 | 1.15 | 1.11 | 1.07 | 1.09 | 59.05  | 5.07  |
| Q67FY2-2 | Isoform 2 of B-cell CLL/lymphoma 9-like protein OS=Mus musculus GN=Bcl9l - [BCL9L_MOUSE]                                      | 1.85  | 2 | 2  | 2  | 4   | 0.99 | 1.28 | 1.29 | 0.87 | 0.88 | 1.33 | 1.34 | 1.24 | 1.25 | 1.17 | 1.19 | 1.16 | 1.18 | 152.54 | 7.78  |

|        |                                                                                                                                 |       |   |    |    |     |      |      |      |      |      |      |      |      |      |      |      |      |      |       |      |
|--------|---------------------------------------------------------------------------------------------------------------------------------|-------|---|----|----|-----|------|------|------|------|------|------|------|------|------|------|------|------|------|-------|------|
| P08030 | Adenine phosphoribosyltransferase OS=Mus musculus GN=Aprt PE=2 SV=2 - [APT_MOUSE]                                               | 5.56  | 1 | 1  | 1  | 1   | 1.00 | 1.58 | 1.57 | 1.06 | 1.05 | 1.15 | 1.14 | 1.24 | 1.23 | 0.88 | 0.88 | 0.81 | 0.81 | 19.71 | 6.79 |
| Q8K2Q0 | COMM domain-containing protein 9 OS=Mus musculus GN=CommD9 PE=2 SV=3 - [COMD9_MOUSE]                                            | 6.06  | 1 | 1  | 1  | 1   | 1.20 | 1.27 | 1.05 | 1.32 | 1.09 | 0.87 | 0.72 | 1.24 | 1.03 | 1.18 | 0.98 | 1.02 | 0.85 | 21.84 | 5.82 |
| P50153 | Guanine nucleotide-binding protein G(I)/G(S)/G(O) subunit gamma-4 OS=Mus musculus GN=Gng4 PE=2 SV=1 - [GBG4_MOUSE]              | 66.67 | 1 | 4  | 4  | 23  | 1.31 | 1.00 | 0.82 | 1.02 | 0.82 | 1.50 | 1.10 | 1.24 | 0.96 | 1.40 | 1.06 | 1.44 | 1.11 | 8.40  | 7.08 |
| Q55VR5 | E3 ubiquitin-protein ligase RNF130 OS=Mus musculus GN=Rnf130 PE=2 SV=1 - [Q55VR5_MOUSE]                                         | 11.46 | 2 | 3  | 3  | 6   | 1.18 | 0.98 | 1.06 | 0.98 | 0.86 | 1.00 | 0.88 | 1.24 | 1.04 | 1.17 | 0.98 | 1.15 | 0.94 | 42.40 | 9.19 |
| Q9R226 | KH domain-containing, RNA-binding, signal transduction-associated protein 3 OS=Mus musculus GN=Khdrb3 PE=1 SV=1 - [KHDR3_MOUSE] | 23.70 | 1 | 9  | 10 | 64  | 0.92 | 0.96 | 0.99 | 0.94 | 1.07 | 1.25 | 1.36 | 1.24 | 1.42 | 1.15 | 1.23 | 1.04 | 1.10 | 38.78 | 8.10 |
| Q9Z0H7 | B-cell lymphoma/leukemia 10 OS=Mus musculus GN=Bel10 PE=1 SV=1 - [BCL10_MOUSE]                                                  | 8.15  | 1 | 2  | 2  | 6   | 0.81 | 0.87 | 1.17 | 0.74 | 0.99 | 1.05 | 1.39 | 1.24 | 1.47 | 0.94 | 1.19 | 0.98 | 1.21 | 25.93 | 6.55 |
| D3YXL3 | Uncharacterized protein OS=Mus musculus GN=Gm5830 PE=4 SV=1 - [D3YXL3_MOUSE]                                                    | 29.52 | 2 | 1  | 2  | 56  | 0.83 | 0.90 | 1.09 | 1.09 | 1.32 | 1.08 | 1.29 | 1.24 | 1.49 | 1.15 | 1.39 | 0.93 | 1.12 | 11.69 | 6.06 |
| B1AXP6 | Isoform 2 of Mitochondrial import receptor subunit TOM5 homolog OS=Mus musculus GN=Tomm5 - [TOM5_MOUSE]                         | 18.60 | 4 | 1  | 1  | 6   | 1.24 | 1.19 | 0.96 | 1.01 | 0.87 | 1.36 | 1.10 | 1.24 | 1.08 | 1.23 | 0.99 | 1.23 | 1.11 | 5.11  | 9.52 |
| P12787 | Cytochrome c oxidase subunit 5A, mitochondrial OS=Mus musculus GN=Cox5a PE=1 SV=2 - [COX5A_MOUSE]                               | 63.01 | 1 | 11 | 12 | 262 | 0.92 | 0.77 | 0.82 | 0.85 | 0.91 | 1.22 | 1.33 | 1.24 | 1.34 | 1.11 | 1.21 | 1.06 | 1.13 | 16.09 | 6.54 |
| Q3U1T3 | Breast cancer metastasis-suppressor 1-like protein OS=Mus musculus GN=Brms11 PE=2 SV=1 - [BRM11_MOUSE]                          | 2.48  | 1 | 1  | 1  | 1   | 0.92 | 1.03 | 1.11 | 0.81 | 0.88 | 1.15 | 1.24 | 1.24 | 1.34 | 1.11 | 1.20 | 1.07 | 1.16 | 37.63 | 5.15 |



|          |                                                                                                  |       |   |   |   |    |      |      |      |      |      |      |      |      |      |      |      |      |      |        |      |
|----------|--------------------------------------------------------------------------------------------------|-------|---|---|---|----|------|------|------|------|------|------|------|------|------|------|------|------|------|--------|------|
| P97927   | Laminin subunit alpha-4 OS=Mus musculus GN=Lama4 PE=1 SV=2 - [LAMA4_MOUSE]                       | 7.21  | 1 | 8 | 9 | 14 | 0.98 | 1.17 | 1.14 | 1.01 | 0.95 | 1.21 | 1.17 | 1.24 | 1.26 | 1.16 | 1.12 | 1.17 | 1.10 | 201.69 | 6.21 |
| Q3UX37   | Protein Plekhg1 OS=Mus musculus GN=Plekhh1 PE=2 SV=1 - [Q3UX37_MOUSE]                            | 1.01  | 2 | 1 | 1 | 2  | 1.14 | 1.24 | 1.09 | 1.22 | 1.07 | 1.25 | 1.09 | 1.24 | 1.09 | 1.09 | 0.96 | 1.09 | 0.96 | 155.78 | 6.40 |
| P54254   | Ataxin-1 OS=Mus musculus GN=Atxn1 PE=1 SV=2 - [ATX1_MOUSE]                                       | 4.42  | 2 | 2 | 2 | 8  | 0.98 | 1.15 | 1.11 | 0.97 | 0.84 | 1.09 | 1.14 | 1.24 | 1.27 | 1.18 | 1.21 | 1.08 | 0.95 | 83.74  | 8.16 |
| Q8CCJ4-2 | Isoform 2 of APC membrane recruitment protein 2 OS=Mus musculus GN=Amer2 - [AMER2_MOUSE]         | 24.54 | 1 | 1 | 9 | 28 | 0.62 | 1.44 | 2.34 | 0.99 | 1.62 | 0.98 | 1.58 | 1.24 | 2.01 | 0.93 | 1.52 | 0.92 | 1.49 | 57.32  | 8.44 |
| D3Z511   | Protein eva-1 homolog A (Fragment) OS=Mus musculus GN=Eva1a PE=2 SV=1 - [D3Z511_MOUSE]           | 16.13 | 2 | 2 | 2 | 6  | 1.12 | 1.24 | 1.08 | 1.03 | 0.98 | 1.25 | 1.11 | 1.24 | 1.11 | 1.13 | 1.01 | 1.05 | 0.99 | 17.64  | 6.55 |
| Q8C195   | Oxysterol-binding protein-related protein 11 OS=Mus musculus GN=Oshp11 PE=1 SV=2 - [OSB11_MOUSE] | 2.13  | 2 | 1 | 1 | 2  | 1.01 | 0.97 | 0.96 | 0.95 | 0.94 | 1.21 | 1.18 | 1.24 | 1.22 | 1.23 | 1.22 | 1.17 | 1.16 | 83.58  | 7.01 |
| Q922P9   | Putative oxidoreductase GLYR1 OS=Mus musculus GN=Glyr1 PE=2 SV=1 - [GLYR1_MOUSE]                 | 4.40  | 2 | 2 | 2 | 4  | 1.14 | 0.95 | 0.83 | 1.08 | 0.95 | 0.94 | 0.82 | 1.24 | 1.09 | 1.12 | 0.98 | 1.03 | 0.90 | 59.68  | 9.22 |
| P46656   | Adrenodoxin, mitochondrial OS=Mus musculus GN=Fdx1 PE=2 SV=1 - [ADX_MOUSE]                       | 25.00 | 1 | 4 | 4 | 5  | 0.98 | 0.96 | 0.93 | 0.93 | 0.94 | 1.10 | 1.17 | 1.24 | 1.20 | 1.04 | 1.02 | 0.94 | 0.91 | 20.11  | 5.62 |
| Q3UY34   | Uncharacterized protein C12orf43 homolog OS=Mus musculus PE=2 SV=1 - [CLO43_MOUSE]               | 43.75 | 2 | 9 | 9 | 24 | 1.07 | 1.16 | 1.08 | 1.04 | 1.01 | 1.17 | 1.11 | 1.24 | 1.16 | 1.11 | 1.09 | 0.95 | 0.92 | 27.61  | 8.70 |
| Q9DBX1   | Regulator of cell cycle RGCC OS=Mus musculus GN=Rgcc PE=1 SV=1 - [RGCC_MOUSE]                    | 21.90 | 1 | 2 | 2 | 4  | 0.96 | 1.07 | 1.11 | 0.86 | 0.89 | 1.05 | 1.08 | 1.24 | 1.29 | 1.09 | 1.14 | 1.02 | 1.06 | 14.71  | 4.84 |
| P63254   | Cysteine-rich protein 1 OS=Mus musculus GN=Crip1 PE=2 SV=2 - [CRIP1_MOUSE]                       | 12.99 | 1 | 2 | 2 | 13 | 0.97 | 0.93 | 0.82 | 0.89 | 0.85 | 1.15 | 1.07 | 1.24 | 1.23 | 1.13 | 1.12 | 0.98 | 0.99 | 8.54   | 8.57 |
| Q91XF0   | Pyridoxine-5'-phosphate oxidase OS=Mus musculus GN=Pppo PE=1 SV=1 - [PNPO_MOUSE]                 | 27.59 | 2 | 6 | 6 | 20 | 1.02 | 1.01 | 1.05 | 0.94 | 1.00 | 1.06 | 1.11 | 1.24 | 1.09 | 1.17 | 1.00 | 1.13 | 1.20 | 30.09  | 8.22 |
| D3YUW7   | Cingulin OS=Mus musculus GN=Cgn PE=2 SV=1 - [D3YUW7_MOUSE]                                       | 5.66  | 4 | 5 | 5 | 9  | 1.16 | 1.16 | 0.94 | 1.03 | 0.89 | 1.33 | 1.01 | 1.24 | 1.06 | 1.36 | 1.17 | 1.30 | 1.04 | 135.66 | 5.86 |

|          |                                                                                                                  |       |   |    |    |    |      |      |      |      |      |      |      |      |      |      |      |      |      |        |       |
|----------|------------------------------------------------------------------------------------------------------------------|-------|---|----|----|----|------|------|------|------|------|------|------|------|------|------|------|------|------|--------|-------|
| Q8CI08   | SLAIN motif-containing protein 2<br>OS=Mus musculus<br>GN=Slain2 PE=1<br>SV=2 -<br>[SLAI2_MOUSE]                 | 21.34 | 2 | 8  | 8  | 16 | 1.05 | 0.88 | 0.91 | 0.93 | 0.98 | 1.21 | 1.15 | 1.24 | 1.23 | 1.22 | 1.15 | 1.04 | 0.99 | 62.34  | 9.47  |
| P43275   | Histone H1.1 OS=Mus musculus<br>GN=Hist1h1a PE=1<br>SV=2 -<br>[H11_MOUSE]                                        | 19.72 | 1 | 3  | 6  | 11 | 0.93 | 1.04 | 1.12 | 1.06 | 1.06 | 1.19 | 1.23 | 1.24 | 1.27 | 1.20 | 1.30 | 1.06 | 1.13 | 21.77  | 10.93 |
| Q70IV5-2 | Isoform 2 of Synemin<br>OS=Mus musculus<br>GN=Synm -<br>[SYNEM_MOUSE]                                            | 13.58 | 3 | 14 | 15 | 32 | 1.07 | 1.23 | 1.02 | 0.88 | 0.85 | 1.26 | 1.10 | 1.24 | 1.12 | 1.23 | 1.13 | 1.17 | 1.07 | 140.78 | 5.15  |
| Q8CCN1   | NACHT, LRR and PYD domains-containing protein 10<br>OS=Mus musculus<br>GN=Nlrp10 PE=1<br>SV=1 -<br>[NAL10_MOUSE] | 2.53  | 1 | 1  | 1  | 2  | 0.87 | 1.28 | 1.47 | 1.05 | 1.21 | 1.16 | 1.32 | 1.24 | 1.42 | 1.32 | 1.51 | 0.94 | 1.08 | 76.32  | 6.60  |
| G3X8V5   | RIKEN cDNA 2610206B13, isoform CRA_b OS=Mus musculus<br>GN=Rnf219 PE=4 SV=1 -<br>[G3X8V5_MOUSE]                  | 6.79  | 4 | 4  | 4  | 6  | 1.04 | 0.99 | 0.94 | 0.93 | 0.94 | 1.25 | 1.11 | 1.24 | 1.15 | 1.11 | 0.99 | 0.96 | 0.92 | 79.93  | 6.33  |
| Q3TRR0   | Microtubule-associated protein 9 OS=Mus musculus<br>GN=Map9 PE=2 SV=2 -<br>[MAP9_MOUSE]                          | 30.50 | 2 | 15 | 15 | 59 | 1.05 | 0.86 | 0.78 | 1.00 | 0.96 | 1.16 | 1.14 | 1.24 | 1.06 | 1.13 | 1.02 | 0.87 | 0.91 | 73.47  | 7.62  |
| Q9DBR0   | A-kinase anchor protein 8 OS=Mus musculus<br>GN=Akap8 PE=1 SV=1 -<br>[AKAP8_MOUSE]                               | 10.19 | 1 | 7  | 7  | 18 | 1.03 | 1.04 | 1.00 | 0.99 | 0.95 | 1.26 | 1.23 | 1.25 | 1.16 | 1.13 | 1.10 | 1.08 | 1.08 | 76.25  | 5.14  |
| Q569Z6   | Thyroid hormone receptor-associated protein 3 OS=Mus musculus<br>GN=Thrap3 PE=1 SV=1 -<br>[TR150_MOUSE]          | 22.92 | 4 | 19 | 20 | 70 | 0.99 | 0.78 | 0.81 | 0.97 | 0.96 | 1.17 | 1.19 | 1.25 | 1.22 | 1.07 | 1.07 | 1.01 | 1.00 | 108.11 | 10.17 |
| E0CZ61   | Protein Gm16039 (Fragment) OS=Mus musculus<br>GN=Gm16039 PE=2 SV=1 -<br>[E0CZ61_MOUSE]                           | 22.12 | 5 | 1  | 1  | 6  | 1.00 | 1.09 | 1.08 | 1.01 | 1.02 | 1.11 | 1.12 | 1.25 | 1.21 | 1.24 | 1.13 | 1.01 | 1.00 | 10.95  | 4.59  |
| E0CXY9   | Arginine vasopressin-induced protein 1 (Fragment) OS=Mus musculus<br>GN=Avp1 PE=2 SV=1 -<br>[E0CXY9_MOUSE]       | 11.39 | 2 | 1  | 1  | 4  | 1.36 | 1.85 | 1.36 | 0.85 | 0.63 | 1.15 | 0.84 | 1.25 | 0.92 | 1.04 | 0.77 | 1.10 | 0.81 | 8.94   | 9.96  |
| Q8BRV5   | Uncharacterized protein KIAA1671 OS=Mus musculus<br>GN=Kiaa1671 PE=2 SV=1 -<br>[K1671_MOUSE]                     | 20.45 | 1 | 5  | 5  | 19 | 0.93 | 1.02 | 1.03 | 0.98 | 1.04 | 1.22 | 1.22 | 1.25 | 1.34 | 1.15 | 1.25 | 1.00 | 1.02 | 34.65  | 6.09  |

|          |                                                                                                                       |       |   |    |    |     |      |      |      |      |      |      |      |      |      |      |      |      |      |        |      |
|----------|-----------------------------------------------------------------------------------------------------------------------|-------|---|----|----|-----|------|------|------|------|------|------|------|------|------|------|------|------|------|--------|------|
| Q9CY97-2 | Isoform 2 of RNA polymerase II subunit A C-terminal domain phosphatase SSU72 OS=Mus musculus GN=Ssu72 - [SSU72_MOUSE] | 36.26 | 2 | 5  | 5  | 13  | 0.92 | 0.96 | 1.06 | 0.80 | 0.88 | 1.23 | 1.35 | 1.25 | 1.39 | 1.04 | 1.13 | 1.13 | 1.27 | 20.85  | 6.98 |
| F8VQC7   | Kinectin OS=Mus musculus GN=Ktn1 PE=2 SV=1 - [F8VQC7_MOUSE]                                                           | 44.69 | 3 | 5  | 48 | 122 | 0.97 | 0.83 | 0.84 | 0.94 | 0.93 | 1.24 | 1.32 | 1.25 | 1.24 | 1.17 | 1.23 | 1.06 | 1.11 | 152.45 | 5.90 |
| P51885   | Lumican OS=Mus musculus GN=Lum PE=1 SV=2 - [LUM_MOUSE]                                                                | 11.83 | 1 | 3  | 3  | 4   | 1.05 | 0.99 | 0.94 | 0.79 | 0.75 | 2.00 | 1.89 | 1.25 | 1.18 | 1.50 | 1.35 | 1.18 | 1.12 | 38.24  | 6.43 |
| O54965-2 | Isoform 2 of E3 ubiquitin-protein ligase RNF13 OS=Mus musculus GN=Rnf13 - [RNF13_MOUSE]                               | 11.57 | 2 | 2  | 2  | 6   | 0.95 | 1.04 | 1.09 | 0.96 | 1.01 | 1.19 | 1.21 | 1.25 | 1.37 | 1.18 | 1.27 | 1.13 | 1.17 | 30.23  | 6.30 |
| D3YZZ4   | TSC22 domain family protein 4 OS=Mus musculus GN=Tsc22d4 PE=2 SV=1 - [D3YZZ4_MOUSE]                                   | 32.74 | 3 | 3  | 5  | 20  | 1.05 | 1.21 | 1.08 | 0.99 | 0.89 | 1.14 | 0.99 | 1.25 | 1.12 | 1.18 | 1.12 | 1.32 | 1.19 | 17.57  | 8.51 |
| Q0P5V2   | Sine oculis-binding protein homolog OS=Mus musculus GN=Sobp PE=2 SV=1 - [SOBP_MOUSE]                                  | 4.40  | 1 | 3  | 3  | 11  | 1.04 | 1.11 | 0.99 | 1.10 | 1.04 | 1.18 | 1.07 | 1.25 | 1.13 | 0.95 | 0.91 | 0.90 | 0.88 | 91.73  | 7.97 |
| Q62084   | Protein phosphatase 1 regulatory subunit 14B OS=Mus musculus GN=Ppp1r14b PE=1 SV=2 - [PP14B_MOUSE]                    | 40.14 | 1 | 4  | 4  | 10  | 1.01 | 0.87 | 1.11 | 0.83 | 0.92 | 0.97 | 0.95 | 1.25 | 1.32 | 0.89 | 0.99 | 1.01 | 1.04 | 15.95  | 4.86 |
| Q8R3P8   | Protein Rnf113a1 OS=Mus musculus GN=Rnf113a1 PE=2 SV=1 - [Q8R3P8_MOUSE]                                               | 24.05 | 1 | 6  | 6  | 10  | 1.00 | 0.85 | 0.99 | 1.02 | 1.19 | 1.29 | 1.16 | 1.25 | 1.20 | 1.14 | 1.11 | 0.88 | 1.00 | 38.42  | 7.06 |
| Q9QXV0   | ProSAAS OS=Mus musculus GN=Pesk1n PE=1 SV=2 - [PCSK1_MOUSE]                                                           | 45.74 | 1 | 9  | 9  | 107 | 1.58 | 1.20 | 0.76 | 0.97 | 0.68 | 1.24 | 0.80 | 1.25 | 0.84 | 1.54 | 0.97 | 1.54 | 0.97 | 27.25  | 5.85 |
| D3Z229   | Histone-lysine N-methyltransferase NSD2 (Fragment) OS=Mus musculus GN=Whsc1 PE=2 SV=1 - [D3Z229_MOUSE]                | 20.00 | 6 | 3  | 3  | 4   | 1.07 | 0.77 | 0.78 | 1.02 | 0.95 | 1.32 | 1.23 | 1.25 | 1.18 | 1.19 | 1.11 | 1.01 | 0.90 | 24.73  | 8.63 |
| Q80U49   | Centrosomal protein of 170 kDa protein B OS=Mus musculus GN=Cep170b PE=1 SV=2 - [C170B_MOUSE]                         | 41.61 | 2 | 47 | 49 | 141 | 0.98 | 1.02 | 1.04 | 0.95 | 0.97 | 1.21 | 1.23 | 1.25 | 1.25 | 1.14 | 1.13 | 1.05 | 1.09 | 170.72 | 6.87 |
| Q8CHD8   | Rab11 family-interacting protein 3 OS=Mus musculus GN=Rab11fp3 PE=1 SV=2 - [RFIP3_MOUSE]                              | 5.64  | 3 | 3  | 4  | 6   | 1.02 | 1.04 | 1.08 | 0.90 | 0.88 | 1.28 | 1.24 | 1.25 | 1.24 | 1.07 | 1.11 | 1.10 | 1.13 | 118.46 | 4.39 |

|        |                                                                                                            |       |   |    |    |    |      |      |      |      |      |      |      |      |      |      |      |      |      |        |      |
|--------|------------------------------------------------------------------------------------------------------------|-------|---|----|----|----|------|------|------|------|------|------|------|------|------|------|------|------|------|--------|------|
| Q8VE99 | Coiled-coil domain-containing protein 115<br>OS=Mus musculus<br>GN=Ccdc115 PE=2<br>SV=1 -<br>[CC115_MOUSE] | 9.44  | 1 | 1  | 1  | 5  | 1.05 | 0.91 | 0.87 | 1.32 | 1.26 | 1.11 | 1.06 | 1.25 | 1.19 | 1.22 | 1.16 | 1.06 | 1.01 | 19.73  | 8.81 |
| Q8CI51 | PDZ and LIM domain protein 5 OS=Mus musculus GN=Pdlim5 PE=1 SV=4 -<br>[PDL5_MOUSE]                         | 35.53 | 3 | 11 | 15 | 54 | 1.00 | 1.03 | 1.03 | 0.96 | 0.97 | 1.12 | 1.19 | 1.25 | 1.22 | 1.15 | 1.15 | 1.06 | 1.11 | 63.26  | 8.25 |
| P33174 | Chromosome-associated kinesin KIF4 OS=Mus musculus GN=Kif4 PE=1 SV=3 -<br>[KIF4_MOUSE]                     | 1.46  | 1 | 1  | 2  | 2  | 1.09 | 0.91 | 0.83 | 0.91 | 0.83 | 1.17 | 1.07 | 1.25 | 1.14 | 1.25 | 1.15 | 1.14 | 1.05 | 139.43 | 6.68 |
| Q9QY13 | DnaJ homolog subfamily B member 1 OS=Mus musculus GN=Dnajb1 PE=2 SV=3 -<br>[DNJB1_MOUSE]                   | 20.59 | 1 | 6  | 7  | 18 | 0.93 | 0.82 | 0.88 | 0.94 | 0.99 | 1.25 | 1.26 | 1.25 | 1.23 | 1.16 | 1.08 | 1.00 | 1.04 | 38.14  | 8.63 |
| Q9CQU1 | Microfibrillar-associated protein 1 OS=Mus musculus GN=Mfap1 PE=1 SV=1 -<br>[MFAP1_MOUSE]                  | 36.45 | 1 | 12 | 12 | 33 | 1.03 | 0.89 | 0.90 | 0.96 | 0.98 | 1.16 | 1.12 | 1.25 | 1.25 | 1.10 | 1.08 | 1.06 | 1.09 | 51.92  | 4.98 |
| E9Q7M2 | Protein Tsc22d2 OS=Mus musculus GN=Tsc22d2 PE=2 SV=1 -<br>[E9Q7M2_MOUSE]                                   | 8.19  | 1 | 4  | 6  | 20 | 0.97 | 0.80 | 0.89 | 0.98 | 0.95 | 1.21 | 1.18 | 1.25 | 1.20 | 1.12 | 1.16 | 1.10 | 1.06 | 78.15  | 4.89 |
| Q91XC8 | Death-associated protein 1 OS=Mus musculus GN=Dap PE=1 SV=3 -<br>[DAP1_MOUSE]                              | 24.51 | 1 | 1  | 1  | 9  | 0.89 | 0.73 | 0.81 | 0.96 | 1.07 | 1.18 | 1.32 | 1.25 | 1.40 | 1.19 | 1.34 | 1.08 | 1.21 | 11.15  | 9.36 |
| P32648 | VIP peptides OS=Mus musculus GN=Vip PE=1 SV=1 -<br>[VIP_MOUSE]                                             | 27.06 | 1 | 3  | 3  | 16 | 1.01 | 1.01 | 0.95 | 0.84 | 0.81 | 1.10 | 1.10 | 1.25 | 1.22 | 0.99 | 1.05 | 0.82 | 0.91 | 19.04  | 6.60 |
| Q8C5W3 | Tubulin-specific chaperone cofactor E-like protein OS=Mus musculus GN=Tbcel PE=1 SV=1 -<br>[TBCEL_MOUSE]   | 3.77  | 2 | 1  | 2  | 2  | 0.76 | 0.76 | 0.99 | 0.86 | 1.12 | 1.08 | 1.41 | 1.25 | 1.63 | 1.02 | 1.33 | 1.14 | 1.49 | 48.00  | 5.53 |
| Q9D1F5 | UPF0544 protein C5orf45 homolog OS=Mus musculus GN=C5orf45 PE=2 SV=1 -<br>[CE045_MOUSE]                    | 2.69  | 1 | 1  | 1  | 2  | 1.07 | 1.02 | 0.96 | 0.94 | 0.88 | 1.19 | 1.10 | 1.25 | 1.16 | 1.10 | 1.03 | 1.15 | 1.08 | 36.87  | 7.99 |
| Q9JHJ0 | Tropomodulin-3 OS=Mus musculus GN=Tmod3 PE=1 SV=1 -<br>[TMOD3_MOUSE]                                       | 28.41 | 1 | 7  | 8  | 18 | 1.09 | 0.86 | 0.85 | 0.87 | 0.82 | 1.11 | 1.17 | 1.25 | 1.27 | 1.15 | 1.17 | 0.99 | 0.98 | 39.48  | 5.14 |
| Q8R1B5 | Complexin-3 OS=Mus musculus GN=Cplx3 PE=1 SV=1 -<br>[CPLX3_MOUSE]                                          | 61.39 | 2 | 8  | 8  | 33 | 0.99 | 0.86 | 0.82 | 0.96 | 0.98 | 1.23 | 1.27 | 1.25 | 1.26 | 1.07 | 1.11 | 0.86 | 0.97 | 17.57  | 4.89 |
| E9Q1M6 | Protein Maskbp3 OS=Mus musculus GN=Ankhd1 PE=4 SV=1 -<br>[E9Q1M6_MOUSE]                                    | 3.82  | 5 | 5  | 6  | 9  | 0.99 | 1.14 | 1.15 | 0.95 | 0.93 | 1.24 | 1.19 | 1.25 | 1.17 | 1.23 | 1.25 | 1.34 | 1.34 | 263.24 | 5.92 |

|        |                                                                                                                  |       |   |    |    |     |      |      |      |      |      |      |      |      |      |      |      |      |      |        |      |
|--------|------------------------------------------------------------------------------------------------------------------|-------|---|----|----|-----|------|------|------|------|------|------|------|------|------|------|------|------|------|--------|------|
| Q6PFD9 | Nuclear pore complex protein Nup98-Nup96 OS=Mus musculus GN=Nup98 PE=1 SV=2 - [NUP98_MOUSE]                      | 9.86  | 1 | 12 | 12 | 29  | 0.96 | 0.86 | 0.95 | 0.92 | 0.98 | 1.07 | 1.16 | 1.25 | 1.24 | 1.05 | 1.08 | 0.96 | 1.06 | 197.12 | 6.18 |
| Q99J83 | Autophagy protein 5 OS=Mus musculus GN=Atg5 PE=1 SV=1 - [ATG5_MOUSE]                                             | 5.45  | 1 | 1  | 1  | 2   | 0.90 | 1.01 | 1.12 | 1.08 | 1.20 | 1.20 | 1.33 | 1.25 | 1.39 | 1.06 | 1.18 | 1.13 | 1.26 | 32.38  | 5.91 |
| Q9CZR8 | Elongation factor Ts, mitochondrial OS=Mus musculus GN=Tsfm PE=2 SV=1 - [EFTS_MOUSE]                             | 29.32 | 3 | 7  | 7  | 16  | 1.06 | 1.02 | 1.00 | 0.95 | 1.02 | 1.10 | 1.22 | 1.25 | 1.23 | 1.21 | 1.22 | 1.21 | 1.15 | 35.31  | 7.06 |
| Q99KJ8 | Dynaactin subunit 2 OS=Mus musculus GN=Dctn2 PE=1 SV=3 - [DCTN2_MOUSE]                                           | 65.17 | 1 | 23 | 25 | 219 | 0.96 | 0.84 | 0.89 | 0.85 | 0.88 | 1.27 | 1.30 | 1.25 | 1.32 | 1.13 | 1.18 | 1.01 | 1.07 | 44.09  | 5.26 |
| Q9QYS9 | Isoform 4 of Protein quaking OS=Mus musculus GN=Qki - [QKI_MOUSE]                                                | 38.56 | 8 | 11 | 11 | 35  | 0.96 | 0.90 | 0.98 | 0.92 | 1.00 | 1.23 | 1.27 | 1.25 | 1.29 | 1.19 | 1.20 | 1.14 | 1.19 | 35.11  | 7.43 |
| Q9CQN3 | Mitochondrial import receptor subunit TOM6 homolog OS=Mus musculus GN=Tomm6 PE=3 SV=1 - [TOM6_MOUSE]             | 41.89 | 1 | 2  | 2  | 5   | 1.00 | 1.28 | 1.23 | 1.03 | 1.03 | 1.14 | 1.12 | 1.25 | 1.25 | 1.26 | 1.21 | 1.12 | 1.13 | 7.86   | 4.89 |
| Q9WVH4 | Forkhead box protein O3 OS=Mus musculus GN=Foxo3 PE=1 SV=1 - [FOXO3_MOUSE]                                       | 5.51  | 2 | 2  | 2  | 3   | 0.85 | 0.80 | 0.94 | 1.05 | 1.23 | 1.49 | 1.74 | 1.25 | 1.47 | 1.14 | 1.34 | 1.25 | 1.47 | 71.02  | 5.12 |
| Q55FM8 | RNA-binding protein 27 OS=Mus musculus GN=Rbm27 PE=2 SV=3 - [RBM27_MOUSE]                                        | 6.04  | 3 | 4  | 5  | 8   | 1.01 | 0.83 | 0.85 | 1.01 | 1.00 | 1.18 | 1.25 | 1.25 | 1.33 | 1.13 | 1.17 | 1.14 | 1.17 | 118.48 | 9.19 |
| Q8K3D3 | Isoform 2 of DNA repair protein SWI5 homolog OS=Mus musculus GN=Swi5 - [SWI5_MOUSE]                              | 42.15 | 3 | 4  | 4  | 18  | 1.00 | 0.91 | 0.85 | 0.98 | 1.01 | 1.23 | 1.23 | 1.25 | 1.19 | 1.09 | 1.09 | 0.99 | 0.99 | 13.82  | 5.17 |
| A3KGQ6 | Actin-related protein 2/3 complex subunit 5-like protein OS=Mus musculus GN=Arpc5l PE=2 SV=1 - [A3KGQ6_MOUSE]    | 76.47 | 2 | 14 | 14 | 55  | 0.95 | 0.87 | 0.90 | 0.89 | 0.96 | 1.17 | 1.33 | 1.25 | 1.26 | 1.14 | 1.21 | 1.07 | 1.07 | 17.10  | 6.80 |
| Q3UHF7 | Transcription factor HIVEP2 OS=Mus musculus GN=Hivep2 PE=1 SV=1 - [ZIEP2_MOUSE]                                  | 3.58  | 1 | 5  | 5  | 8   | 1.12 | 0.83 | 0.82 | 1.03 | 1.00 | 1.10 | 1.05 | 1.25 | 1.11 | 1.10 | 1.04 | 1.09 | 1.00 | 266.54 | 6.96 |
| Q61206 | Platelet-activating factor acetylhydrolase IB subunit beta OS=Mus musculus GN=Pafah1b2 PE=1 SV=2 - [PA1B2_MOUSE] | 64.19 | 1 | 9  | 9  | 48  | 1.01 | 0.90 | 0.89 | 0.93 | 0.88 | 1.18 | 1.15 | 1.25 | 1.21 | 1.17 | 1.15 | 1.16 | 1.15 | 25.57  | 5.92 |

|        |                                                                                                     |       |   |    |    |     |      |      |      |      |      |      |      |      |      |      |      |      |      |        |      |
|--------|-----------------------------------------------------------------------------------------------------|-------|---|----|----|-----|------|------|------|------|------|------|------|------|------|------|------|------|------|--------|------|
| Q8CFC7 | Isoform 2 of CLK4-associating serine/arginine rich protein OS=Mus musculus GN=Clasp - [CLASR_MOUSE] | 2.38  | 3 | 1  | 1  | 2   | 1.12 | 1.17 | 1.05 | 0.91 | 0.82 | 1.04 | 0.93 | 1.25 | 1.12 | 1.13 | 1.01 | 1.15 | 1.03 | 65.93  | 9.98 |
| E9Q7P2 | Protein Caena1i OS=Mus musculus GN=Caena1i PE=2 SV=1 - [E9Q7P2_MOUSE]                               | 2.50  | 1 | 2  | 2  | 5   | 0.87 | 1.29 | 1.48 | 0.99 | 1.15 | 1.09 | 1.25 | 1.25 | 1.44 | 1.12 | 1.29 | 1.20 | 1.38 | 242.74 | 6.47 |
| Q91YL2 | E3 ubiquitin-protein ligase RNF126 OS=Mus musculus GN=Rnf126 PE=1 SV=1 - [RN126_MOUSE]              | 13.10 | 1 | 3  | 3  | 6   | 1.12 | 1.43 | 1.16 | 0.92 | 0.75 | 1.19 | 1.04 | 1.25 | 1.14 | 1.05 | 0.86 | 1.01 | 0.90 | 34.06  | 5.17 |
| B1AZR7 | Protein Pcdh11x OS=Mus musculus GN=Pcdh11x PE=2 SV=1 - [B1AZR7_MOUSE]                               | 1.74  | 2 | 2  | 2  | 3   | 1.06 | 1.13 | 1.06 | 1.11 | 1.04 | 1.23 | 1.15 | 1.25 | 1.18 | 1.37 | 1.29 | 1.37 | 1.30 | 145.30 | 5.30 |
| A2AVR1 | Tetratricopeptide repeat protein 4 (Fragment) OS=Mus musculus GN=Ttc4 PE=2 SV=1 - [A2AVR1_MOUSE]    | 4.15  | 3 | 1  | 1  | 4   | 1.78 | 1.34 | 0.75 | 1.08 | 0.61 | 1.12 | 0.63 | 1.25 | 1.15 | 0.52 | 0.31 | 1.13 | 0.64 | 27.84  | 5.52 |
| Q6ZWR6 | Isoform 2 of Nesprin-1 OS=Mus musculus GN=Synel - [SYNE1_MOUSE]                                     | 5.35  | 1 | 1  | 3  | 6   | 0.98 | 1.21 | 1.24 | 0.98 | 1.00 | 1.31 | 1.34 | 1.25 | 1.28 | 0.91 | 0.94 | 1.01 | 1.04 | 111.26 | 5.35 |
| Q6R891 | Neurabin-2 OS=Mus musculus GN=Ppp1r9b PE=1 SV=1 - [NEB2_MOUSE]                                      | 52.51 | 2 | 33 | 35 | 270 | 1.00 | 0.95 | 0.98 | 0.91 | 0.90 | 1.31 | 1.26 | 1.25 | 1.21 | 1.12 | 1.11 | 1.07 | 1.05 | 89.47  | 4.92 |
| Q9Z2I2 | Peptidyl-prolyl cis-trans isomerase FKBP1B OS=Mus musculus GN=Fkbp1b PE=1 SV=3 - [FKB1B_MOUSE]      | 28.70 | 1 | 2  | 2  | 18  | 0.96 | 0.89 | 0.92 | 0.96 | 0.95 | 1.35 | 1.38 | 1.25 | 1.39 | 1.13 | 1.18 | 0.95 | 1.02 | 11.79  | 8.47 |
| Q99LJ0 | CTTNBP2 N-terminal-like protein OS=Mus musculus GN=Ctnb2nl PE=1 SV=1 - [CT2NL_MOUSE]                | 26.49 | 1 | 12 | 13 | 27  | 1.03 | 0.87 | 0.88 | 0.95 | 0.88 | 1.21 | 1.18 | 1.25 | 1.12 | 1.11 | 1.07 | 1.08 | 1.07 | 69.80  | 7.71 |
| Q8BKR5 | Protein phosphatase 1 regulatory subunit 37 OS=Mus musculus GN=Ppp1r37 PE=2 SV=1 - [PPR37_MOUSE]    | 6.04  | 1 | 2  | 3  | 5   | 1.55 | 1.27 | 0.82 | 1.27 | 0.82 | 1.18 | 0.76 | 1.25 | 0.81 | 1.07 | 0.69 | 1.94 | 1.25 | 77.53  | 5.06 |
| Q8JZL3 | Thiamine-triphosphatase OS=Mus musculus GN=Thtpa PE=1 SV=3 - [THTPA_MOUSE]                          | 16.96 | 1 | 3  | 3  | 6   | 1.00 | 0.79 | 0.72 | 0.92 | 0.93 | 0.88 | 0.92 | 1.25 | 1.20 | 1.01 | 1.15 | 0.94 | 1.04 | 24.25  | 4.72 |
| Q05BE0 | Zc4h2 protein OS=Mus musculus GN=Zc4h2 PE=2 SV=1 - [Q05BE0_MOUSE]                                   | 11.73 | 3 | 3  | 3  | 6   | 0.85 | 1.00 | 1.22 | 1.04 | 0.88 | 1.36 | 1.45 | 1.25 | 1.48 | 1.22 | 1.22 | 1.10 | 1.24 | 23.05  | 7.18 |

|        |                                                                                                                       |       |   |    |    |      |      |      |      |      |      |      |      |      |      |      |      |       |      |       |       |
|--------|-----------------------------------------------------------------------------------------------------------------------|-------|---|----|----|------|------|------|------|------|------|------|------|------|------|------|------|-------|------|-------|-------|
| F6Z1A4 | Myelin basic protein (Fragment) OS=Mus musculus GN=Mbp PE=2 SV=1 - [F6Z1A4_MOUSE]                                     | 76.43 | 3 | 3  | 21 | 1034 | 1.16 | 0.59 | 0.53 | 0.81 | 0.85 | 1.32 | 1.13 | 1.25 | 1.08 | 0.82 | 0.66 | 1.12  | 0.93 | 17.10 | 10.87 |
| Q6PIU9 | Uncharacterized protein FLJ45252 homolog OS=Mus musculus PE=1 SV=2 - [YJ005_MOUSE]                                    | 22.03 | 1 | 5  | 5  | 12   | 1.07 | 1.17 | 1.06 | 0.97 | 0.89 | 1.26 | 1.11 | 1.25 | 1.14 | 1.11 | 1.08 | 1.08  | 1.05 | 37.68 | 5.07  |
| Q91W45 | Polyadenylate-binding protein-interacting protein 2B OS=Mus musculus GN=Paip2b PE=2 SV=2 - [PAI2B_MOUSE]              | 57.35 | 1 | 5  | 5  | 12   | 1.09 | 0.98 | 0.78 | 1.07 | 0.90 | 1.25 | 1.07 | 1.25 | 1.31 | 1.10 | 1.01 | 1.30  | 1.17 | 15.46 | 4.32  |
| Q9CWX7 | Gamma-soluble NSF attachment protein OS=Mus musculus GN=Napg PE=1 SV=1 - [SNAG_MOUSE]                                 | 66.99 | 2 | 22 | 22 | 264  | 0.95 | 0.87 | 0.94 | 0.86 | 0.90 | 1.23 | 1.30 | 1.25 | 1.29 | 1.13 | 1.17 | 1.04  | 1.10 | 34.71 | 5.41  |
| Q6PEV3 | WAS/WASL-interacting protein family member 2 OS=Mus musculus GN=Wipf2 PE=2 SV=1 - [WIPF2_MOUSE]                       | 49.77 | 2 | 14 | 14 | 87   | 1.02 | 0.94 | 0.88 | 0.95 | 0.91 | 1.20 | 1.16 | 1.25 | 1.19 | 1.11 | 1.05 | 1.01  | 0.99 | 46.27 | 10.99 |
| F6XIX0 | Synaptotagmin-1 (Fragment) OS=Mus musculus GN=Synj1 PE=2 SV=1 - [F6XIX0_MOUSE]                                        | 93.20 | 1 | 1  | 4  | 14   | 1.28 | 1.56 | 1.22 | 1.03 | 0.81 | 1.37 | 1.07 | 1.25 | 0.98 | 1.33 | 1.04 | 10.01 | 7.84 | 10.79 | 8.19  |
| Q8VDD8 | WAS protein family homolog 1 OS=Mus musculus GN=Wash1 PE=2 SV=1 - [WASH1_MOUSE]                                       | 8.21  | 1 | 3  | 3  | 6    | 0.99 | 0.72 | 0.72 | 0.91 | 0.92 | 1.44 | 1.37 | 1.25 | 1.20 | 1.23 | 1.19 | 1.12  | 1.08 | 51.63 | 5.44  |
| Q71FD5 | E3 ubiquitin-protein ligase ZNRF2 OS=Mus musculus GN=Znrf2 PE=1 SV=1 - [ZNRF2_MOUSE]                                  | 35.71 | 7 | 6  | 6  | 14   | 1.16 | 0.99 | 0.76 | 0.98 | 0.87 | 1.34 | 1.05 | 1.25 | 1.04 | 1.20 | 0.92 | 1.14  | 0.95 | 23.69 | 6.76  |
| Q80Y55 | BSD domain-containing protein 1 OS=Mus musculus GN=Bsdcl1 PE=2 SV=1 - [BSDC1_MOUSE]                                   | 38.41 | 1 | 11 | 11 | 29   | 1.09 | 1.07 | 0.96 | 1.04 | 0.89 | 1.26 | 1.12 | 1.25 | 1.15 | 1.17 | 1.09 | 1.14  | 1.08 | 46.92 | 4.40  |
| Q8C739 | Protein FAM110B OS=Mus musculus GN=Fam110b PE=2 SV=1 - [F110B_MOUSE]                                                  | 19.40 | 1 | 5  | 5  | 11   | 1.11 | 1.03 | 0.89 | 0.92 | 0.91 | 1.16 | 1.11 | 1.26 | 1.17 | 1.15 | 1.10 | 1.15  | 1.06 | 40.34 | 9.23  |
| Q9CQU5 | ZW10 interactor OS=Mus musculus GN=Zwint PE=2 SV=1 - [ZWINT_MOUSE]                                                    | 27.38 | 1 | 5  | 6  | 15   | 1.16 | 0.92 | 0.79 | 0.98 | 0.86 | 1.25 | 1.13 | 1.26 | 1.04 | 1.18 | 1.06 | 1.08  | 0.96 | 28.70 | 8.43  |
| Q9CXP8 | Guanine nucleotide-binding protein G(I)/G(S)/G(O) subunit gamma-10 OS=Mus musculus GN=Gng10 PE=3 SV=1 - [GBG10_MOUSE] | 30.88 | 2 | 1  | 2  | 9    | 1.01 | 1.16 | 1.14 | 1.09 | 1.07 | 1.39 | 1.37 | 1.26 | 1.24 | 1.31 | 1.30 | 1.43  | 1.42 | 7.22  | 7.85  |

|        |                                                                                                           |       |   |    |    |     |      |      |      |      |      |      |      |      |      |      |      |      |      |       |      |
|--------|-----------------------------------------------------------------------------------------------------------|-------|---|----|----|-----|------|------|------|------|------|------|------|------|------|------|------|------|------|-------|------|
| B1AXP3 | MCG1697, isoform CRA_a OS=Mus musculus GN=Fam154a PE=4 SV=1 - [B1AXP3_MOUSE]                              | 3.57  | 1 | 1  | 1  | 1   | 0.73 | 0.85 | 1.17 | 0.48 | 0.67 | 1.42 | 1.94 | 1.26 | 1.73 | 0.83 | 1.14 | 0.54 | 0.75 | 54.75 | 8.82 |
| Q9CR27 | WASH complex subunit CCDC53 OS=Mus musculus GN=Ccdc53 PE=2 SV=1 - [CCD53_MOUSE]                           | 23.20 | 2 | 3  | 3  | 12  | 0.97 | 1.07 | 0.99 | 0.90 | 0.92 | 1.10 | 1.28 | 1.26 | 1.36 | 1.19 | 1.17 | 1.11 | 1.12 | 21.08 | 4.46 |
| P56942 | Pro-MCH OS=Mus musculus GN=Pmch PE=1 SV=2 - [MCH_MOUSE]                                                   | 27.88 | 1 | 4  | 4  | 29  | 1.28 | 1.03 | 0.81 | 1.08 | 0.81 | 1.30 | 1.01 | 1.26 | 0.93 | 1.35 | 1.02 | 1.34 | 1.02 | 18.50 | 7.14 |
| E2QRQ3 | Double-stranded RNA-binding protein Staufen homolog 2 OS=Mus musculus GN=Stau2 PE=2 SV=1 - [E2QRQ3_MOUSE] | 10.15 | 6 | 3  | 3  | 8   | 0.98 | 0.91 | 0.97 | 0.99 | 1.03 | 1.19 | 1.18 | 1.26 | 1.27 | 1.11 | 1.16 | 1.05 | 1.07 | 51.96 | 9.67 |
| O88569 | Heterogeneous nuclear ribonucleoproteins A2/B1 OS=Mus musculus GN=Hnrpa2b1 PE=1 SV=2 - [ROA2_MOUSE]       | 66.01 | 3 | 24 | 29 | 753 | 1.01 | 0.92 | 0.91 | 0.91 | 0.89 | 1.19 | 1.15 | 1.26 | 1.22 | 1.12 | 1.09 | 1.10 | 1.08 | 37.38 | 8.95 |
| Q8BR86 | Isoform 3 of Kin of IRRE-like protein 3 OS=Mus musculus GN=Kirrel3 - [KIRR3_MOUSE]                        | 1.47  | 5 | 1  | 1  | 1   | 1.24 | 1.11 | 0.89 | 0.83 | 0.67 | 0.99 | 0.79 | 1.26 | 1.01 | 1.08 | 0.87 | 1.09 | 0.88 | 67.05 | 7.53 |
| M0QWR6 | Mitochondrial import receptor subunit TOM40B OS=Mus musculus GN=Tomm40l PE=4 SV=1 - [M0QWR6_MOUSE]        | 32.65 | 5 | 1  | 1  | 2   | 1.23 | 0.63 | 0.51 | 1.53 | 1.24 | 1.43 | 1.15 | 1.26 | 1.01 | 1.47 | 1.20 | 1.47 | 1.19 | 5.37  | 7.36 |
| Q6PDC0 | RUN domain-containing protein 3B OS=Mus musculus GN=Rundc3b PE=2 SV=1 - [RUN3B_MOUSE]                     | 13.48 | 2 | 4  | 4  | 7   | 1.33 | 1.39 | 1.00 | 1.39 | 1.00 | 1.16 | 0.86 | 1.26 | 1.00 | 1.18 | 0.98 | 1.25 | 1.04 | 45.11 | 5.17 |
| O70200 | Allograft inflammatory factor 1 OS=Mus musculus GN=Aif1 PE=1 SV=1 - [AIF1_MOUSE]                          | 23.81 | 2 | 3  | 3  | 6   | 1.00 | 0.79 | 0.74 | 0.83 | 0.83 | 1.32 | 1.31 | 1.26 | 1.22 | 1.13 | 1.15 | 1.14 | 1.14 | 16.90 | 8.76 |
| A2TJV2 | Paralemin-3 OS=Mus musculus GN=Palms3 PE=2 SV=1 - [PALM3_MOUSE]                                           | 18.80 | 1 | 10 | 10 | 29  | 1.14 | 1.09 | 1.01 | 0.96 | 0.84 | 1.24 | 1.09 | 1.26 | 1.12 | 1.04 | 0.97 | 1.12 | 1.00 | 78.74 | 4.50 |
| P10107 | Annexin A1 OS=Mus musculus GN=Anxa1 PE=1 SV=2 - [ANXA1_MOUSE]                                             | 8.38  | 1 | 2  | 2  | 3   | 1.10 | 1.18 | 1.07 | 1.12 | 1.02 | 1.24 | 1.13 | 1.26 | 1.14 | 1.20 | 1.09 | 1.13 | 1.03 | 38.71 | 7.37 |
| Q91VM5 | RNA binding motif protein, X-linked-like-1 OS=Mus musculus GN=Rbmx1l PE=1 SV=1 - [RMLX1_MOUSE]            | 42.53 | 1 | 5  | 17 | 93  | 0.94 | 0.93 | 0.97 | 0.86 | 0.93 | 1.22 | 1.27 | 1.26 | 1.34 | 1.16 | 1.20 | 1.17 | 1.24 | 42.14 | 9.99 |



|          |                                                                                                                |       |   |    |    |     |      |      |      |      |      |      |      |      |      |      |      |      |      |        |       |
|----------|----------------------------------------------------------------------------------------------------------------|-------|---|----|----|-----|------|------|------|------|------|------|------|------|------|------|------|------|------|--------|-------|
| P62900   | 60S ribosomal protein L31 OS=Mus musculus GN=Rpl31 PE=2 SV=1 - [RL31_MOUSE]                                    | 32.80 | 1 | 4  | 4  | 22  | 1.05 | 1.06 | 0.97 | 1.05 | 0.99 | 1.06 | 1.03 | 1.26 | 1.10 | 1.03 | 1.03 | 1.10 | 1.02 | 14.45  | 10.54 |
| Q62433   | Protein NDRG1 OS=Mus musculus GN=Ndr1 PE=1 SV=1 - [NDRG1_MOUSE]                                                | 34.01 | 6 | 9  | 9  | 69  | 1.03 | 1.02 | 1.05 | 1.06 | 1.01 | 1.22 | 1.17 | 1.26 | 1.23 | 1.22 | 1.21 | 1.23 | 1.19 | 42.98  | 6.10  |
| Q810C0   | SLIT and NTRK-like protein 2 OS=Mus musculus GN=Slitrk2 PE=1 SV=1 - [SLIK2_MOUSE]                              | 4.02  | 1 | 3  | 3  | 5   | 1.04 | 1.06 | 0.87 | 1.01 | 0.96 | 1.13 | 0.93 | 1.26 | 1.14 | 1.19 | 1.00 | 1.11 | 0.78 | 95.38  | 7.65  |
| Q80X59   | Transmembrane and coiled-coil domain-containing protein 5B OS=Mus musculus GN=Tmco5b PE=2 SV=1 - [TMC5B_MOUSE] | 3.26  | 1 | 1  | 1  | 1   | 1.15 | 0.81 | 0.70 | 0.95 | 0.82 | 1.29 | 1.11 | 1.26 | 1.09 | 1.16 | 1.01 | 1.12 | 0.98 | 36.04  | 6.32  |
| P32020-2 | Isoform SCP2 of Non-specific lipid-transfer protein OS=Mus musculus GN=Scp2 - [NLTP_MOUSE]                     | 63.64 | 2 | 11 | 11 | 44  | 1.00 | 0.79 | 0.79 | 0.85 | 0.86 | 1.28 | 1.24 | 1.26 | 1.27 | 1.11 | 1.09 | 1.12 | 1.12 | 15.23  | 9.31  |
| Q8BP27-2 | Isoform 2 of Swi5-dependent recombination DNA repair protein 1 homolog OS=Mus musculus GN=Sfr1 - [SFR1_MOUSE]  | 36.30 | 3 | 7  | 7  | 22  | 0.99 | 0.97 | 1.11 | 0.85 | 0.96 | 1.20 | 1.25 | 1.26 | 1.32 | 1.09 | 1.14 | 0.92 | 1.05 | 33.51  | 5.14  |
| P35459   | Lymphocyte antigen 6D OS=Mus musculus GN=Ly6d PE=1 SV=1 - [LY6D_MOUSE]                                         | 11.02 | 1 | 1  | 1  | 2   | 0.87 | 1.17 | 1.35 | 0.88 | 1.01 | 1.33 | 1.53 | 1.26 | 1.45 | 1.18 | 1.36 | 1.08 | 1.24 | 13.39  | 7.50  |
| E9Q1K7   | Regulator of G-protein-signaling 12 OS=Mus musculus GN=Rgs12 PE=2 SV=1 - [E9Q1K7_MOUSE]                        | 7.33  | 9 | 3  | 3  | 6   | 0.97 | 0.82 | 0.87 | 1.01 | 1.04 | 1.11 | 1.13 | 1.26 | 1.33 | 1.05 | 1.12 | 1.06 | 1.10 | 78.56  | 8.21  |
| Q9DA16   | Protein FAM135B OS=Mus musculus GN=Fam135b PE=2 SV=3 - [F135B_MOUSE]                                           | 0.78  | 1 | 1  | 1  | 2   | 0.97 | 1.17 | 1.21 | 1.05 | 1.09 | 1.07 | 1.10 | 1.26 | 1.30 | 1.18 | 1.22 | 1.13 | 1.17 | 155.43 | 6.02  |
| Q9WTX5   | S-phase kinase-associated protein 1 OS=Mus musculus GN=Skp1 PE=1 SV=3 - [SKP1_MOUSE]                           | 84.05 | 3 | 16 | 16 | 206 | 0.97 | 0.80 | 0.84 | 0.92 | 0.94 | 1.24 | 1.30 | 1.26 | 1.29 | 1.12 | 1.13 | 1.01 | 1.03 | 18.66  | 4.54  |
| B1AXR5   | Pertilipin-2 (Fragment) OS=Mus musculus GN=Pim2 PE=4 SV=1 [B1AXR5_MOUSE]                                       | 8.16  | 2 | 1  | 1  | 1   | 1.30 | 0.75 | 0.57 | 1.26 | 0.97 | 1.09 | 0.84 | 1.26 | 0.97 | 1.17 | 0.90 | 0.63 | 0.49 | 20.68  | 5.34  |
| Q5SSZ5   | Tensin-3 OS=Mus musculus GN=Tns3 PE=1 SV=1 - [TENS3_MOUSE]                                                     | 4.93  | 2 | 3  | 4  | 8   | 1.05 | 1.00 | 0.97 | 1.23 | 1.11 | 1.24 | 1.19 | 1.26 | 1.22 | 1.19 | 1.16 | 1.25 | 1.16 | 155.49 | 6.65  |

|        |                                                                                                  |       |    |    |    |    |      |      |      |      |      |      |      |      |      |      |      |      |      |        |       |
|--------|--------------------------------------------------------------------------------------------------|-------|----|----|----|----|------|------|------|------|------|------|------|------|------|------|------|------|------|--------|-------|
| F6XVP7 | E3 ubiquitin-protein ligase RNF31 (Fragment) OS=Mus musculus GN=Rnf31 PE=4 SV=1 - [F6XVP7_MOUSE] | 4.06  | 3  | 2  | 2  | 4  | 1.08 | 1.33 | 1.23 | 1.02 | 0.94 | 1.15 | 1.06 | 1.26 | 1.16 | 1.22 | 1.13 | 1.50 | 1.39 | 102.05 | 6.77  |
| Q9Z1Y4 | Thyroid receptor-interacting protein 6 OS=Mus musculus GN=Trip6 PE=1 SV=1 - [TRIP6_MOUSE]        | 8.33  | 1  | 2  | 2  | 4  | 0.83 | 1.01 | 1.21 | 0.92 | 1.10 | 1.13 | 1.34 | 1.26 | 1.51 | 1.30 | 1.56 | 1.14 | 1.36 | 50.90  | 7.31  |
| A8Y5P4 | MAP7 domain-containing protein 1 OS=Mus musculus GN=Map7d1 PE=2 SV=1 - [A8Y5P4_MOUSE]            | 24.32 | 5  | 17 | 18 | 45 | 1.03 | 0.86 | 0.86 | 0.97 | 0.96 | 1.21 | 1.15 | 1.26 | 1.16 | 1.12 | 1.08 | 1.01 | 1.00 | 90.04  | 10.04 |
| Q9JI44 | DNA methyltransferase 1-associated protein 1 OS=Mus musculus GN=Dmap1 PE=1 SV=1 - [DMAP1_MOUSE]  | 8.76  | 2  | 3  | 3  | 6  | 0.96 | 1.02 | 0.99 | 0.98 | 1.03 | 1.15 | 1.11 | 1.26 | 1.42 | 1.14 | 1.20 | 1.09 | 1.08 | 53.10  | 9.50  |
| O08796 | Eukaryotic elongation factor 2 kinase OS=Mus musculus GN=Eef2k PE=1 SV=1 - [EF2K_MOUSE]          | 2.35  | 1  | 1  | 1  | 1  | 0.89 | 0.95 | 1.07 | 0.99 | 1.11 | 1.11 | 1.24 | 1.26 | 1.41 | 0.95 | 1.07 | 0.85 | 0.96 | 81.69  | 5.38  |
| A2AJ72 | MCG130458 OS=Mus musculus GN=Fubp3 PE=4 SV=1 - [A2AJ72_MOUSE]                                    | 8.44  | 3  | 3  | 5  | 8  | 0.93 | 0.88 | 0.94 | 0.90 | 0.96 | 1.32 | 1.40 | 1.26 | 1.35 | 1.10 | 1.18 | 1.06 | 1.13 | 61.41  | 8.28  |
| P59759 | MKL/myocardin-like protein 2 OS=Mus musculus GN=Mkl2 PE=1 SV=1 - [MKL2_MOUSE]                    | 33.52 | 12 | 22 | 27 | 65 | 1.08 | 0.89 | 0.87 | 1.04 | 0.99 | 1.34 | 1.27 | 1.26 | 1.14 | 1.19 | 1.08 | 1.11 | 1.07 | 117.47 | 6.16  |
| Q6PFX2 | BEN domain-containing protein 6 OS=Mus musculus GN=Bend6 PE=2 SV=1 - [BEND6_MOUSE]               | 12.81 | 3  | 3  | 3  | 9  | 0.93 | 0.87 | 1.00 | 0.81 | 0.94 | 1.25 | 1.47 | 1.26 | 1.49 | 1.15 | 1.32 | 0.99 | 1.15 | 31.25  | 8.92  |
| Q8CB27 | Ubiquitin thioesterase OTU1 OS=Mus musculus GN=Yod1 PE=1 SV=1 - [OTU1_MOUSE]                     | 7.29  | 1  | 1  | 1  | 2  | 1.34 | 1.13 | 0.84 | 1.24 | 0.92 | 1.27 | 0.94 | 1.26 | 0.94 | 1.15 | 0.86 | 1.30 | 0.97 | 37.46  | 5.76  |
| F8VQK5 | SAM and SH3 domain-containing protein 1 OS=Mus musculus GN=Sash1 PE=2 SV=1 - [F8VQK5_MOUSE]      | 25.69 | 4  | 23 | 23 | 62 | 1.08 | 0.99 | 0.92 | 0.99 | 0.90 | 1.16 | 1.06 | 1.26 | 1.12 | 1.20 | 1.08 | 1.16 | 1.09 | 135.54 | 6.20  |
| A2AQP0 | Myosin-7B OS=Mus musculus GN=Myh7b PE=3 SV=1 - [MYH7B_MOUSE]                                     | 4.95  | 1  | 2  | 10 | 24 | 1.19 | 0.96 | 0.80 | 1.04 | 0.88 | 1.29 | 1.08 | 1.26 | 1.06 | 1.19 | 1.00 | 1.09 | 0.92 | 221.36 | 5.88  |

|        |                                                                                                                  |       |   |    |    |     |      |      |      |      |      |      |      |      |      |      |      |      |      |        |      |
|--------|------------------------------------------------------------------------------------------------------------------|-------|---|----|----|-----|------|------|------|------|------|------|------|------|------|------|------|------|------|--------|------|
| Q921P9 | Transcription elongation factor A protein-like 1 OS=Mus musculus GN=Tcaal1 PE=2 SV=1 - [TCAL1_MOUSE]             | 37.58 | 1 | 6  | 6  | 17  | 1.13 | 0.97 | 0.83 | 1.06 | 0.90 | 1.16 | 1.00 | 1.26 | 1.05 | 1.14 | 0.97 | 1.02 | 1.05 | 19.30  | 4.54 |
| Q91WN1 | DnaJ homolog subfamily C member 9 OS=Mus musculus GN=Dnaj9 PE=2 SV=2 - [DNIC9_MOUSE]                             | 47.10 | 1 | 13 | 13 | 33  | 1.09 | 0.86 | 0.82 | 1.01 | 0.93 | 1.24 | 1.14 | 1.26 | 1.10 | 1.20 | 1.10 | 1.11 | 0.97 | 30.04  | 5.94 |
| Q8R0A0 | General transcription factor IIF subunit 2 OS=Mus musculus GN=Gt2f2 PE=1 SV=1 - [T2FB_MOUSE]                     | 49.80 | 1 | 10 | 10 | 32  | 1.00 | 0.95 | 0.94 | 0.94 | 0.97 | 1.23 | 1.26 | 1.26 | 1.24 | 1.16 | 1.12 | 0.98 | 1.12 | 28.36  | 9.22 |
| A2A9P8 | E3 ubiquitin-protein ligase MIB2 (Fragment) OS=Mus musculus GN=Mib2 PE=2 SV=1 - [A2A9P8_MOUSE]                   | 4.80  | 3 | 1  | 1  | 1   | 1.36 | 1.64 | 1.20 | 1.22 | 0.90 | 0.76 | 0.56 | 1.26 | 0.93 | 1.32 | 0.97 | 1.82 | 1.34 | 41.14  | 8.63 |
| Q9JIX0 | Enhancer of yellow 2 transcription factor homolog OS=Mus musculus GN=Eny2 PE=2 SV=1 - [ENY2_MOUSE]               | 24.75 | 1 | 2  | 2  | 6   | 1.01 | 0.86 | 0.88 | 1.00 | 0.97 | 1.27 | 1.18 | 1.26 | 1.20 | 1.19 | 1.18 | 1.07 | 1.08 | 11.52  | 9.33 |
| J3KMN0 | Protein Kmt2d OS=Mus musculus GN=Kmt2d PE=4 SV=1 - [J3KMN0_MOUSE]                                                | 1.74  | 2 | 5  | 6  | 9   | 1.11 | 1.20 | 1.08 | 1.04 | 0.94 | 1.28 | 1.16 | 1.26 | 1.18 | 1.25 | 1.12 | 1.34 | 1.21 | 599.93 | 5.78 |
| Q8BL65 | Actin-binding LIM protein 2 OS=Mus musculus GN=Ablim2 PE=1 SV=1 - [ABLM2_MOUSE]                                  | 54.08 | 6 | 2  | 26 | 193 | 1.00 | 1.06 | 1.05 | 0.95 | 0.91 | 1.39 | 1.18 | 1.26 | 1.26 | 1.04 | 1.06 | 1.01 | 1.00 | 68.06  | 8.02 |
| Q62425 | NADH dehydrogenase [ubiquinone] 1 alpha subcomplex subunit 4 OS=Mus musculus GN=Ndufa4 PE=1 SV=2 - [NDUA4_MOUSE] | 47.56 | 1 | 5  | 5  | 29  | 1.07 | 0.95 | 0.94 | 1.10 | 1.03 | 1.22 | 1.19 | 1.26 | 1.23 | 1.23 | 1.17 | 1.16 | 1.10 | 9.32   | 9.52 |
| Q8R2U4 | N-terminal Xaa-Pro-Lys N-methyltransferase 1 OS=Mus musculus GN=Ntmt1 PE=2 SV=3 - [NTM1A_MOUSE]                  | 8.52  | 1 | 1  | 1  | 1   | 1.38 | 1.68 | 1.22 | 1.04 | 0.75 | 1.27 | 0.92 | 1.26 | 0.91 | 1.21 | 0.88 | 0.95 | 0.69 | 25.40  | 6.90 |
| P26350 | Prothymosin alpha OS=Mus musculus GN=Ptma PE=1 SV=2 - [PTMA_MOUSE]                                               | 23.42 | 2 | 5  | 5  | 90  | 0.96 | 0.76 | 0.80 | 0.99 | 0.97 | 1.30 | 1.23 | 1.26 | 1.25 | 1.11 | 1.14 | 1.06 | 1.03 | 12.25  | 3.79 |
| O55176 | E3 ubiquitin-protein ligase Praja-1 OS=Mus musculus GN=Pja1 PE=1 SV=3 - [PJA1_MOUSE]                             | 26.82 | 6 | 8  | 9  | 31  | 1.10 | 1.11 | 0.97 | 1.05 | 0.94 | 1.34 | 1.18 | 1.26 | 1.13 | 1.10 | 1.03 | 1.09 | 0.94 | 63.87  | 4.97 |

|        |                                                                                                                     |       |   |    |    |      |      |      |      |      |      |      |      |      |      |      |      |      |      |        |       |
|--------|---------------------------------------------------------------------------------------------------------------------|-------|---|----|----|------|------|------|------|------|------|------|------|------|------|------|------|------|------|--------|-------|
| Q9EQC8 | Papillary renal cell carcinoma (Translocation-associated) OS=Mus musculus GN=Prcc PE=2 SV=1 - [Q9EQC8_MOUSE]        | 11.00 | 1 | 5  | 5  | 11   | 1.06 | 0.90 | 0.81 | 0.98 | 0.90 | 1.27 | 1.26 | 1.27 | 1.09 | 1.09 | 1.05 | 1.02 | 0.86 | 52.27  | 4.94  |
| Q9CQ13 | Coordinator of PRMT5 and differentiation stimulator OS=Mus musculus GN=Coprs PE=1 SV=1 - [COPRS_MOUSE]              | 24.86 | 1 | 3  | 3  | 5    | 1.14 | 1.83 | 1.52 | 1.01 | 0.89 | 1.11 | 0.96 | 1.27 | 1.17 | 1.22 | 1.03 | 1.20 | 1.02 | 18.65  | 4.08  |
| A7YQ68 | Prickle-like 2 (Drosophila) OS=Mus musculus GN=Prickle2 PE=2 SV=1 - [A7YQ68_MOUSE]                                  | 37.18 | 2 | 23 | 23 | 99   | 1.12 | 1.17 | 0.96 | 1.04 | 0.95 | 1.19 | 1.05 | 1.27 | 1.08 | 1.16 | 1.04 | 1.22 | 1.06 | 102.17 | 7.80  |
| K3W4N2 | Interleukin-18 OS=Mus musculus GN=Il18 PE=3 SV=1 - [K3W4N2_MOUSE]                                                   | 16.15 | 2 | 2  | 2  | 3    | 0.92 | 0.77 | 0.84 | 0.79 | 0.86 | 0.97 | 1.05 | 1.27 | 1.37 | 0.97 | 1.06 | 0.99 | 1.07 | 22.14  | 4.91  |
| D3Z5K6 | Mitochondrial import inner membrane translocase subunit TIM14 OS=Mus musculus GN=Dnajc19 PE=2 SV=1 - [D3Z5K6_MOUSE] | 29.09 | 5 | 2  | 3  | 6    | 1.04 | 0.60 | 0.58 | 0.92 | 0.88 | 1.25 | 1.19 | 1.27 | 1.21 | 1.07 | 1.02 | 0.91 | 0.87 | 12.18  | 10.10 |
| Q3U5C7 | Prickle-like protein 1 OS=Mus musculus GN=Prickle1 PE=1 SV=1 - [PRIC1_MOUSE]                                        | 7.09  | 1 | 5  | 5  | 7    | 1.00 | 1.19 | 1.12 | 1.15 | 1.11 | 1.25 | 1.20 | 1.27 | 1.29 | 1.04 | 1.11 | 0.87 | 1.02 | 94.07  | 6.28  |
| P60879 | Synaptosomal-associated protein 25 OS=Mus musculus GN=Snap25 PE=1 SV=1 - [SNP25_MOUSE]                              | 77.67 | 1 | 5  | 23 | 1226 | 0.99 | 1.06 | 1.08 | 0.94 | 0.95 | 1.23 | 1.26 | 1.27 | 1.28 | 1.16 | 1.16 | 1.08 | 1.09 | 23.30  | 4.77  |
| E0CYH0 | MCG16685, isoform CRA_d OS=Mus musculus GN=Wtap PE=4 SV=1 - [E0CYH0_MOUSE]                                          | 20.71 | 5 | 6  | 6  | 11   | 0.93 | 0.88 | 0.97 | 0.85 | 0.91 | 1.32 | 1.42 | 1.27 | 1.36 | 1.18 | 1.32 | 0.98 | 1.07 | 44.18  | 5.25  |
| Q99MU3 | Isoform 5 of Double-stranded RNA-specific adenosine deaminase OS=Mus musculus GN=Adar - [DSRAD_MOUSE]               | 4.95  | 5 | 4  | 4  | 5    | 0.98 | 1.01 | 1.03 | 0.98 | 0.98 | 1.22 | 1.27 | 1.27 | 1.25 | 1.14 | 1.12 | 1.11 | 1.09 | 102.51 | 8.78  |
| E9Q8A6 | Glucocorticoid receptor (Fragment) OS=Mus musculus GN=Nr3c1 PE=2 SV=1 - [E9Q8A6_MOUSE]                              | 13.08 | 8 | 1  | 1  | 2    | 0.90 | 0.68 | 0.75 | 0.97 | 1.08 | 1.03 | 1.14 | 1.27 | 1.41 | 1.06 | 1.19 | 1.23 | 1.37 | 13.90  | 8.44  |
| Q8VCF0 | Mitochondrial antiviral-signaling protein OS=Mus musculus GN=Mavs PE=1 SV=1 - [MAVS_MOUSE]                          | 5.17  | 1 | 2  | 2  | 7    | 1.04 | 1.04 | 0.99 | 1.00 | 1.01 | 1.25 | 1.19 | 1.27 | 1.22 | 1.28 | 1.23 | 1.11 | 1.09 | 53.37  | 6.37  |

|        |                                                                                                                                   |       |     |    |    |     |      |      |      |      |      |      |      |      |      |      |      |      |      |       |      |
|--------|-----------------------------------------------------------------------------------------------------------------------------------|-------|-----|----|----|-----|------|------|------|------|------|------|------|------|------|------|------|------|------|-------|------|
| Q78ZA7 | Nucleosome assembly protein 1-like 4<br>OS=Mus musculus<br>GN=Nap14 PE=1<br>SV=1 -<br>[NP14_MOUSE]                                | 56.00 | 1   | 13 | 14 | 105 | 1.03 | 0.94 | 0.94 | 0.88 | 0.92 | 1.21 | 1.16 | 1.27 | 1.22 | 1.14 | 1.13 | 1.01 | 1.03 | 42.65 | 4.67 |
| Q91WE2 | Protein FAM192A<br>OS=Mus musculus<br>GN=Fam192a PE=2<br>SV=1 -<br>[F192A_MOUSE]                                                  | 13.39 | 1   | 3  | 4  | 27  | 1.02 | 0.89 | 0.89 | 1.00 | 0.94 | 1.24 | 1.19 | 1.27 | 1.25 | 1.18 | 1.06 | 1.02 | 0.99 | 28.68 | 5.14 |
| P46660 | Alpha-intermexin<br>OS=Mus musculus<br>GN=Ina PE=1 SV=2 -<br>[AINX_MOUSE]                                                         | 69.05 | 1   | 30 | 35 | 775 | 0.92 | 1.02 | 1.07 | 0.95 | 1.02 | 1.16 | 1.28 | 1.27 | 1.35 | 1.07 | 1.18 | 1.06 | 1.16 | 55.71 | 5.27 |
| G5E8C8 | Protein Zip612<br>OS=Mus musculus<br>GN=Zip612 PE=4<br>SV=1 -<br>[G5E8C8_MOUSE]                                                   | 2.83  | 152 | 1  | 2  | 3   | 1.14 | 0.90 | 0.79 | 0.99 | 0.87 | 1.52 | 1.33 | 1.27 | 1.11 | 1.31 | 1.15 | 1.37 | 1.21 | 76.08 | 8.41 |
| O08915 | AH receptor-interacting protein<br>OS=Mus musculus<br>GN=Aip PE=1 SV=1 -<br>[AIP_MOUSE]                                           | 33.64 | 2   | 8  | 8  | 13  | 0.92 | 0.86 | 0.93 | 0.87 | 0.95 | 1.20 | 1.31 | 1.27 | 1.37 | 1.07 | 1.17 | 1.01 | 1.06 | 37.58 | 6.40 |
| P97855 | Ras GTPase-activating protein-binding protein 1<br>OS=Mus musculus<br>GN=G3bp1 PE=1<br>SV=1 -<br>[G3BP1_MOUSE]                    | 36.34 | 1   | 12 | 12 | 27  | 1.04 | 1.00 | 0.97 | 1.02 | 0.95 | 1.31 | 1.22 | 1.27 | 1.25 | 1.14 | 1.19 | 1.09 | 1.05 | 51.80 | 5.59 |
| Q8BFR4 | N-acetylglucosamine-6-sulfatase<br>OS=Mus musculus<br>GN=Gns PE=2 SV=1 -<br>[GNS_MOUSE]                                           | 10.85 | 1   | 5  | 5  | 13  | 0.96 | 0.87 | 0.87 | 0.89 | 0.97 | 1.17 | 1.12 | 1.27 | 1.37 | 1.14 | 1.25 | 1.04 | 1.08 | 61.14 | 8.24 |
| Q10470 | Beta-1,4-mannosyl-glycoprotein 4-beta-N-acetylglucosaminyltransferase<br>OS=Mus musculus<br>GN=Mgat3 PE=1 SV=2 -<br>[MGAT3_MOUSE] | 2.79  | 2   | 1  | 1  | 2   | 1.17 | 0.96 | 0.83 | 0.91 | 0.78 | 1.11 | 0.94 | 1.27 | 1.08 | 0.90 | 0.78 | 1.01 | 0.87 | 61.96 | 8.15 |
| P20152 | Vimentin<br>OS=Mus musculus<br>GN=Vim PE=1 SV=3 -<br>[VIME_MOUSE]                                                                 | 72.75 | 2   | 24 | 32 | 170 | 1.05 | 0.95 | 0.95 | 0.88 | 0.85 | 1.14 | 1.11 | 1.27 | 1.20 | 1.71 | 1.63 | 1.10 | 1.04 | 53.66 | 5.12 |
| A2ABG4 | Protein Tbc1d16<br>OS=Mus musculus<br>GN=Tbc1d16 PE=2<br>SV=1 -<br>[A2ABG4_MOUSE]                                                 | 2.74  | 1   | 1  | 1  | 1   | 1.20 | 2.36 | 1.97 | 1.17 | 0.98 | 1.22 | 1.02 | 1.27 | 1.06 | 1.26 | 1.06 | 1.43 | 1.20 | 86.48 | 5.58 |
| F7D1Q2 | Protein Tmem44 (Fragment)<br>OS=Mus musculus<br>GN=Tmem44 PE=4<br>SV=1 -<br>[F7D1Q2_MOUSE]                                        | 4.74  | 2   | 1  | 1  | 1   | 1.06 | 1.11 | 1.05 | 1.00 | 0.94 | 1.58 | 1.49 | 1.27 | 1.19 | 1.10 | 1.04 | 1.03 | 0.97 | 23.40 | 5.94 |
| Q8R1N0 | Zinc finger protein 830<br>OS=Mus musculus<br>GN=ZnR830 PE=1<br>SV=1 -<br>[ZN830_MOUSE]                                           | 34.44 | 1   | 7  | 7  | 17  | 1.08 | 0.80 | 0.77 | 1.02 | 0.94 | 1.23 | 1.12 | 1.27 | 1.12 | 1.14 | 1.00 | 1.07 | 0.97 | 40.63 | 5.40 |
| Q3TCX3 | Isoform 2 of UPP0469 protein KIAA0907<br>OS=Mus musculus<br>GN=Kiaa0907 -<br>[K0907_MOUSE]                                        | 1.85  | 2   | 1  | 1  | 1   | 1.36 | 1.44 | 1.05 | 1.30 | 0.95 | 1.32 | 0.96 | 1.27 | 0.93 | 1.02 | 0.75 | 0.92 | 0.68 | 51.17 | 9.23 |

|        |                                                                                                             |       |   |    |    |    |      |      |      |      |      |      |      |      |      |      |      |      |      |        |       |
|--------|-------------------------------------------------------------------------------------------------------------|-------|---|----|----|----|------|------|------|------|------|------|------|------|------|------|------|------|------|--------|-------|
| Q9D172 | ES1 protein homolog, mitochondrial OS=Mus musculus GN=D10Jhu81e PE=1 SV=1 - [ES1_MOUSE]                     | 52.26 | 1 | 10 | 10 | 59 | 0.85 | 0.79 | 0.94 | 0.92 | 1.06 | 1.18 | 1.43 | 1.27 | 1.52 | 1.17 | 1.39 | 1.11 | 1.32 | 28.07  | 8.78  |
| Q5U4C3 | Splicing factor, arginine/serine-rich 19 OS=Mus musculus GN=Scaf1 PE=1 SV=1 - [SFR19_MOUSE]                 | 3.03  | 1 | 3  | 3  | 10 | 1.02 | 0.90 | 0.90 | 1.01 | 0.97 | 1.13 | 1.23 | 1.27 | 1.29 | 1.16 | 1.14 | 1.02 | 1.07 | 133.76 | 9.45  |
| Q69ZC8 | Uncharacterized protein KIAA1704 OS=Mus musculus GN=Kiaa1704 PE=1 SV=2 - [K1704_MOUSE]                      | 28.61 | 1 | 6  | 6  | 17 | 1.08 | 0.87 | 0.76 | 0.97 | 0.91 | 1.23 | 1.12 | 1.27 | 1.19 | 1.10 | 1.03 | 1.10 | 1.01 | 38.93  | 5.41  |
| Q9JJZ6 | Krueppel-like factor 13 OS=Mus musculus GN=Klf13 PE=2 SV=2 - [KLF13_MOUSE]                                  | 5.88  | 1 | 1  | 1  | 2  | 1.01 | 0.93 | 0.92 | 0.94 | 0.93 | 1.12 | 1.10 | 1.27 | 1.25 | 1.09 | 1.07 | 1.06 | 1.04 | 31.12  | 9.64  |
| Q2VPQ9 | Chromatin modification-related protein MEAF6 OS=Mus musculus GN=Meaf6 PE=2 SV=1 - [EAF6_MOUSE]              | 16.75 | 3 | 2  | 2  | 4  | 1.06 | 1.21 | 1.15 | 1.09 | 1.03 | 1.18 | 1.13 | 1.27 | 1.20 | 1.39 | 1.26 | 1.28 | 1.22 | 21.64  | 9.32  |
| Q9R087 | Glypican-6 OS=Mus musculus GN=Gpc6 PE=1 SV=1 - [GPC6_MOUSE]                                                 | 17.66 | 4 | 4  | 6  | 12 | 1.06 | 1.23 | 1.01 | 0.91 | 0.95 | 1.25 | 1.25 | 1.27 | 1.20 | 1.12 | 1.03 | 1.08 | 0.95 | 63.02  | 5.43  |
| P35831 | Tyrosine-protein phosphatase non-receptor type 12 OS=Mus musculus GN=Ptpn12 PE=1 SV=3 - [PTN12_MOUSE]       | 1.03  | 1 | 1  | 1  | 1  | 1.07 | 1.23 | 1.14 | 1.03 | 0.96 | 1.32 | 1.23 | 1.27 | 1.18 | 1.33 | 1.24 | 1.30 | 1.21 | 86.47  | 5.99  |
| Q9R1L5 | Microtubule-associated serine/threonine-protein kinase 1 OS=Mus musculus GN=Mast1 PE=1 SV=3 - [MAST1_MOUSE] | 11.72 | 7 | 11 | 13 | 25 | 1.08 | 1.08 | 1.04 | 1.06 | 0.99 | 1.22 | 1.11 | 1.27 | 1.18 | 1.22 | 1.11 | 1.19 | 1.10 | 170.89 | 8.44  |
| Q8CCP0 | Isoform 2 of Nuclear export mediator factor Nempf OS=Mus musculus GN=Nempf - [NEMF_MOUSE]                   | 3.14  | 4 | 3  | 3  | 3  | 1.77 | 1.54 | 0.96 | 1.31 | 1.08 | 1.71 | 1.02 | 1.27 | 1.04 | 1.16 | 0.91 | 1.00 | 0.82 | 101.97 | 6.18  |
| Q8C8N3 | Brorin OS=Mus musculus GN=Vwc2 PE=1 SV=1 - [VWC2_MOUSE]                                                     | 9.26  | 1 | 2  | 2  | 5  | 1.06 | 1.13 | 0.91 | 1.05 | 0.89 | 1.13 | 1.11 | 1.27 | 1.07 | 1.01 | 0.84 | 0.91 | 0.79 | 35.36  | 5.38  |
| Q9D7E4 | UPF0449 protein C19orf25 homolog OS=Mus musculus PE=1 SV=1 - [CS025_MOUSE]                                  | 61.47 | 1 | 4  | 4  | 13 | 1.12 | 1.01 | 0.97 | 1.06 | 0.93 | 1.17 | 1.06 | 1.27 | 1.12 | 1.10 | 1.01 | 1.10 | 0.87 | 12.10  | 5.25  |
| Q8BY16 | Isoform 3 of Lysophosphatidylcholine acyltransferase 2 OS=Mus musculus GN=Lpcat2 - [PCAT2_MOUSE]            | 3.39  | 3 | 1  | 1  | 1  | 0.83 | 0.86 | 1.02 | 0.87 | 1.05 | 1.19 | 1.41 | 1.27 | 1.52 | 1.08 | 1.30 | 0.90 | 1.08 | 25.47  | 10.11 |

|          |                                                                                                            |       |   |    |    |      |      |      |      |      |      |      |      |      |      |      |      |      |      |        |      |
|----------|------------------------------------------------------------------------------------------------------------|-------|---|----|----|------|------|------|------|------|------|------|------|------|------|------|------|------|------|--------|------|
| P08553   | Neurofilament medium polypeptide OS=Mus musculus GN=Nefm PE=1 SV=4 - [NFM_MOUSE]                           | 71.46 | 2 | 56 | 61 | 1407 | 0.95 | 0.85 | 0.88 | 0.88 | 0.93 | 1.27 | 1.31 | 1.27 | 1.30 | 1.06 | 1.09 | 1.00 | 1.03 | 95.86  | 4.77 |
| Q8BPI1-2 | Isoform 2 of Protein kintoun OS=Mus musculus GN=Dnaaf2 - [KTU_MOUSE]                                       | 1.68  | 2 | 1  | 1  | 2    | 1.12 | 1.24 | 1.10 | 1.03 | 0.92 | 1.30 | 1.15 | 1.27 | 1.13 | 1.30 | 1.16 | 1.21 | 1.07 | 84.55  | 5.05 |
| P09602   | Non-histone chromosomal protein HMG-17 OS=Mus musculus GN=Hmgn2 PE=1 SV=2 - [HMGN2_MOUSE]                  | 22.22 | 6 | 2  | 2  | 23   | 1.19 | 0.85 | 0.70 | 1.00 | 0.86 | 1.21 | 1.03 | 1.28 | 1.09 | 1.24 | 1.05 | 1.13 | 0.99 | 9.42   | 9.99 |
| Q7TMK6   | Protein Hook homolog 2 OS=Mus musculus GN=Hook2 PE=1 SV=3 - [HOOK2_MOUSE]                                  | 2.37  | 1 | 1  | 2  | 32   | 1.04 | 1.12 | 1.08 | 0.97 | 0.93 | 1.03 | 0.99 | 1.28 | 1.23 | 1.05 | 1.02 | 1.19 | 1.15 | 83.31  | 5.43 |
| D9J2V6   | Pre-B-cell leukemia transcription factor 1 OS=Mus musculus GN=Pbx1 PE=2 SV=1 - [D9J2V6_MOUSE]              | 4.13  | 3 | 1  | 1  | 1    | 0.86 | 1.03 | 1.21 | 1.16 | 1.35 | 1.69 | 1.97 | 1.28 | 1.48 | 1.16 | 1.35 | 1.30 | 1.52 | 37.03  | 6.60 |
| Q5PR69-2 | Isoform 2 of Uncharacterized protein KIAA1211 OS=Mus musculus GN=Kiaa1211 - [K1211_MOUSE]                  | 30.65 | 5 | 23 | 23 | 72   | 1.32 | 1.01 | 0.80 | 1.07 | 0.87 | 1.31 | 1.02 | 1.28 | 1.00 | 1.36 | 1.05 | 1.20 | 0.97 | 131.87 | 5.35 |
| Q9CZN4-  | Isoform 3 of Protein shisa-9 OS=Mus musculus GN=Shisa9 - [SHSA9_MOUSE]                                     | 9.46  | 4 | 3  | 3  | 6    | 1.08 | 1.12 | 1.06 | 1.04 | 0.95 | 1.25 | 1.11 | 1.28 | 1.18 | 1.09 | 1.02 | 1.11 | 0.98 | 46.68  | 8.62 |
| F6Q8N5   | Protein Upf3b (Fragment) OS=Mus musculus GN=Upf3b PE=4 SV=1 - [F6Q8N5_MOUSE]                               | 22.69 | 1 | 1  | 5  | 7    | 1.07 | 0.65 | 0.61 | 0.95 | 0.89 | 1.14 | 1.06 | 1.28 | 1.19 | 1.05 | 0.99 | 0.97 | 0.91 | 32.41  | 9.74 |
| B1AXE7   | Zinc finger protein 185 (Fragment) OS=Mus musculus GN=Zfp185 PE=2 SV=1 - [B1AXE7_MOUSE]                    | 15.38 | 3 | 1  | 1  | 2    | 1.09 | 0.98 | 0.90 | 1.31 | 1.21 | 1.19 | 1.09 | 1.28 | 1.17 | 1.30 | 1.20 | 1.00 | 0.92 | 5.82   | 7.43 |
| Q64314   | Hematopoietic progenitor cell antigen CD34 OS=Mus musculus GN=Cd34 PE=1 SV=1 - [CD34_MOUSE]                | 17.02 | 1 | 1  | 7  | 24   | 1.14 | 1.97 | 1.72 | 0.96 | 0.84 | 1.13 | 0.99 | 1.28 | 1.11 | 0.98 | 0.86 | 1.10 | 0.96 | 40.96  | 5.30 |
| F6T4M4   | Serine/arginine repetitive matrix protein 1 (Fragment) OS=Mus musculus GN=Srrm1 PE=2 SV=1 - [F6T4M4_MOUSE] | 26.43 | 1 | 1  | 4  | 14   | 1.65 | 1.19 | 0.68 | 1.05 | 0.62 | 1.27 | 0.75 | 1.28 | 0.72 | 1.08 | 0.62 | 1.27 | 0.79 | 16.23  | 5.38 |

|          |                                                                                                                                   |       |   |   |   |    |      |      |      |      |      |      |      |      |      |      |      |      |      |        |      |
|----------|-----------------------------------------------------------------------------------------------------------------------------------|-------|---|---|---|----|------|------|------|------|------|------|------|------|------|------|------|------|------|--------|------|
| P46718   | Programmed cell death protein 2 OS=Mus musculus GN=Pdcd2 PE=2 SV=2 - [PDCD2_MOUSE]                                                | 4.66  | 1 | 1 | 1 | 1  | 0.91 | 0.81 | 0.88 | 1.20 | 1.32 | 1.23 | 1.34 | 1.28 | 1.39 | 0.98 | 1.08 | 0.87 | 0.95 | 38.32  | 5.38 |
| Q8R1U2   | Cell growth regulator with EF hand domain protein 1 OS=Mus musculus GN=Cgref1 PE=2 SV=1 - [CGRE1_MOUSE]                           | 16.37 | 2 | 3 | 3 | 5  | 1.09 | 1.13 | 0.96 | 0.97 | 0.89 | 1.11 | 1.18 | 1.28 | 1.08 | 1.17 | 1.08 | 1.18 | 1.08 | 30.83  | 4.31 |
| Q9QZH3   | Peptidyl-prolyl cis-trans isomerase E OS=Mus musculus GN=Ppie PE=2 SV=2 - [PPIE_MOUSE]                                            | 39.53 | 1 | 7 | 8 | 14 | 0.99 | 0.81 | 0.81 | 0.95 | 0.94 | 1.23 | 1.14 | 1.28 | 1.26 | 1.11 | 1.05 | 1.06 | 0.99 | 33.43  | 5.60 |
| E0CY42   | Chloride intracellular channel protein 6 (Fragment) OS=Mus musculus GN=Clic6 PE=2 SV=1 - [E0CY42_MOUSE]                           | 24.00 | 2 | 1 | 1 | 3  | 1.15 | 0.64 | 0.55 | 1.11 | 0.97 | 0.99 | 0.85 | 1.28 | 1.10 | 1.56 | 1.36 | 1.18 | 1.03 | 11.29  | 5.14 |
| F7CDW2   | Serine-rich coiled-coil domain-containing protein 1 (Fragment) OS=Mus musculus GN=Cser1 PE=4 SV=1 - [F7CDW2_MOUSE]                | 8.93  | 3 | 1 | 1 | 1  | 0.75 | 0.48 | 0.64 | 0.85 | 1.12 | 0.92 | 1.21 | 1.28 | 1.69 | 0.98 | 1.30 | 0.49 | 0.64 | 18.72  | 5.21 |
| Q6ZQ03   | Formin-binding protein 4 OS=Mus musculus GN=Fbnp4 PE=1 SV=2 - [FBNP4_MOUSE]                                                       | 5.72  | 3 | 4 | 4 | 7  | 1.16 | 1.28 | 1.12 | 1.07 | 0.94 | 1.12 | 0.94 | 1.28 | 1.02 | 1.29 | 0.98 | 1.28 | 0.99 | 111.18 | 4.73 |
| H7BX02   | Probable E3 ubiquitin-protein ligase Roquin OS=Mus musculus GN=Rc3h1 PE=2 SV=1 - [H7BX02_MOUSE]                                   | 1.78  | 2 | 1 | 1 | 2  | 0.99 | 0.95 | 0.96 | 0.95 | 0.96 | 1.18 | 1.18 | 1.28 | 1.28 | 1.21 | 1.22 | 1.05 | 1.05 | 124.32 | 7.18 |
| Q6PRU9   | HemK methyltransferase family member 2, isoform CRA_a OS=Mus musculus GN=N6amt1 PE=2 SV=1 - [Q6PRU9_MOUSE]                        | 12.32 | 4 | 1 | 1 | 2  | 0.98 | 1.21 | 1.23 | 0.97 | 0.99 | 1.13 | 1.14 | 1.28 | 1.30 | 1.20 | 1.22 | 1.39 | 1.42 | 14.68  | 5.21 |
| Q80Y61   | Brain-specific angiogenesis inhibitor 1-associated protein 2-like protein 2 OS=Mus musculus GN=Baiap2l2 PE=1 SV=1 - [BI2L2_MOUSE] | 1.72  | 1 | 1 | 1 | 2  | 1.05 | 1.20 | 1.14 | 0.84 | 0.80 | 1.51 | 1.44 | 1.28 | 1.21 | 1.35 | 1.29 | 1.16 | 1.11 | 58.37  | 9.50 |
| Q8BZ94-3 | Isoform 3 of Zinc finger matrix-type protein 4 OS=Mus musculus GN=Zmat4 - [ZMAT4_MOUSE]                                           | 8.13  | 3 | 1 | 1 | 4  | 0.80 | 0.92 | 1.15 | 0.89 | 1.11 | 0.90 | 1.11 | 1.28 | 1.59 | 0.97 | 1.21 | 0.93 | 1.16 | 17.84  | 9.64 |



|          |                                                                                                        |       |   |    |    |     |      |      |      |      |      |      |      |      |      |      |      |      |      |        |       |
|----------|--------------------------------------------------------------------------------------------------------|-------|---|----|----|-----|------|------|------|------|------|------|------|------|------|------|------|------|------|--------|-------|
| P10922   | Histone H1.0 OS=Mus musculus GN=H10 PE=2 SV=4 - [H10_MOUSE]                                            | 31.44 | 1 | 8  | 8  | 57  | 1.03 | 0.93 | 0.94 | 0.98 | 0.97 | 1.07 | 1.04 | 1.28 | 1.21 | 1.16 | 1.10 | 1.10 | 1.08 | 20.85  | 10.90 |
| Q62132-3 | Isoform Gamma of Receptor-type tyrosine-protein phosphatase R OS=Mus musculus GN=Ptprr - [PTPRR_MOUSE] | 2.18  | 3 | 1  | 1  | 1   | 0.97 | 1.43 | 1.47 | 1.25 | 1.29 | 0.98 | 1.01 | 1.28 | 1.32 | 1.32 | 1.36 | 1.13 | 1.17 | 46.56  | 7.85  |
| Q5RL57   | A kinase (PRKA) anchor protein 8-like OS=Mus musculus GN=Akap8l PE=2 SV=1 - [Q5RL57_MOUSE]             | 12.79 | 2 | 6  | 6  | 26  | 1.14 | 1.17 | 1.03 | 1.18 | 0.93 | 1.10 | 1.20 | 1.28 | 1.26 | 1.19 | 1.10 | 1.26 | 1.08 | 71.26  | 5.06  |
| Q0VBM2   | Protein FAM83B OS=Mus musculus GN=Fam83b PE=1 SV=1 - [FA83B_MOUSE]                                     | 1.28  | 1 | 1  | 1  | 4   | 0.70 | 0.87 | 1.24 | 1.04 | 1.48 | 0.97 | 1.37 | 1.28 | 1.82 | 1.16 | 1.65 | 0.94 | 1.34 | 114.61 | 9.11  |
| Q7TSH4   | Centriolar coiled-coil protein of 110 kDa OS=Mus musculus GN=Ccp110 PE=1 SV=1 - [CP110_MOUSE]          | 3.09  | 1 | 2  | 3  | 7   | 1.11 | 1.11 | 1.00 | 1.06 | 0.95 | 1.24 | 1.11 | 1.28 | 1.15 | 1.21 | 1.10 | 1.29 | 1.17 | 111.07 | 8.85  |
| Q9D1H8   | 39S ribosomal protein L53, mitochondrial OS=Mus musculus GN=Mrpl53 PE=2 SV=1 - [RM53_MOUSE]            | 14.41 | 1 | 1  | 1  | 2   | 1.24 | 1.06 | 0.86 | 0.95 | 0.77 | 1.04 | 0.84 | 1.28 | 1.03 | 0.90 | 0.73 | 1.40 | 1.14 | 12.73  | 9.52  |
| G3UX81   | Protein Hmgb4 OS=Mus musculus GN=Hmgb4 PE=2 SV=1 - [G3UX81_MOUSE]                                      | 10.87 | 2 | 1  | 1  | 4   | 1.52 | 1.30 | 0.85 | 1.18 | 0.77 | 1.45 | 0.95 | 1.28 | 0.84 | 1.41 | 0.93 | 1.62 | 1.06 | 10.84  | 7.43  |
| E9PZ00   | Sulfated glycoprotein 1 OS=Mus musculus GN=Psap PE=2 SV=1 - [E9PZ00_MOUSE]                             | 47.73 | 4 | 1  | 22 | 210 | 1.16 | 0.85 | 0.73 | 0.88 | 0.75 | 1.27 | 1.09 | 1.28 | 1.10 | 1.33 | 1.14 | 0.99 | 0.85 | 60.63  | 5.24  |
| D3YZ20   | DNA-directed RNA polymerase II subunit RPB11 OS=Mus musculus GN=Polr2j PE=2 SV=1 - [D3YZ20_MOUSE]      | 9.01  | 3 | 1  | 1  | 2   | 1.08 | 0.90 | 0.83 | 0.90 | 0.83 | 1.30 | 1.21 | 1.28 | 1.19 | 1.24 | 1.15 | 1.13 | 1.05 | 12.58  | 6.77  |
| Q7TPM1   | Protein PRRC2B OS=Mus musculus GN=Prc2b PE=1 SV=1 - [PRC2B_MOUSE]                                      | 24.02 | 1 | 1  | 23 | 60  | 1.09 | 1.08 | 0.99 | 0.98 | 0.90 | 1.16 | 1.06 | 1.28 | 1.17 | 1.28 | 1.17 | 1.10 | 1.01 | 160.81 | 8.16  |
| E9Q811   | Serine/threonine-protein kinase STK11 OS=Mus musculus GN=Stk11 PE=2 SV=1 - [E9Q811_MOUSE]              | 9.68  | 4 | 2  | 2  | 4   | 0.92 | 0.97 | 1.06 | 1.24 | 1.35 | 0.84 | 0.91 | 1.28 | 1.39 | 0.98 | 1.06 | 0.96 | 1.05 | 34.61  | 5.44  |
| E9Q0V6   | NHS-like protein 2 OS=Mus musculus GN=Nhs12 PE=2 SV=1 - [E9Q0V6_MOUSE]                                 | 16.00 | 2 | 11 | 11 | 18  | 1.07 | 0.98 | 0.94 | 1.04 | 1.03 | 1.40 | 1.42 | 1.28 | 1.36 | 1.40 | 1.38 | 1.42 | 1.36 | 132.27 | 8.48  |

|        |                                                                                                       |       |   |    |    |     |      |      |      |      |      |      |      |      |      |      |      |      |      |        |      |
|--------|-------------------------------------------------------------------------------------------------------|-------|---|----|----|-----|------|------|------|------|------|------|------|------|------|------|------|------|------|--------|------|
| Q9Z266 | SNARE-associated protein Snapin<br>OS=Mus musculus<br>GN=Snapin PE=1<br>SV=1 -<br>[SNAPN_MOUSE]       | 26.47 | 2 | 3  | 3  | 7   | 1.17 | 1.00 | 0.88 | 0.97 | 0.85 | 1.30 | 1.10 | 1.28 | 1.04 | 1.22 | 1.06 | 1.14 | 0.96 | 14.89  | 9.31 |
| P58064 | 28S ribosomal protein S6, mitochondrial<br>OS=Mus musculus<br>GN=Mmps6 PE=2<br>SV=3 -<br>[RT06_MOUSE] | 25.60 | 1 | 3  | 3  | 4   | 0.98 | 0.81 | 0.88 | 0.94 | 0.96 | 1.22 | 1.23 | 1.28 | 1.30 | 1.29 | 1.32 | 1.16 | 1.23 | 14.30  | 9.50 |
| D3Z6P2 | Zinc finger protein 740 (Fragment)<br>OS=Mus musculus<br>GN=Zfp740 PE=2<br>SV=1 -<br>[D3Z6P2_MOUSE]   | 11.21 | 4 | 1  | 1  | 2   | 0.96 | 0.95 | 0.98 | 1.03 | 1.07 | 1.11 | 1.14 | 1.28 | 1.33 | 1.09 | 1.13 | 1.46 | 1.51 | 12.10  | 9.50 |
| Q99JX3 | Golgi reassembly-stacking protein 2<br>OS=Mus musculus<br>GN=Gorasp2 PE=1<br>SV=3 -<br>[GORS2_MOUSE]  | 29.71 | 5 | 8  | 8  | 11  | 1.06 | 0.77 | 0.78 | 1.02 | 0.95 | 1.44 | 1.31 | 1.28 | 1.23 | 1.27 | 1.17 | 1.15 | 1.02 | 47.01  | 4.79 |
| Q63918 | Serum deprivation-response protein<br>OS=Mus musculus<br>GN=Sdpr PE=1 SV=3 -<br>[SDPR_MOUSE]          | 30.62 | 1 | 11 | 11 | 29  | 1.09 | 0.93 | 0.87 | 0.90 | 0.90 | 1.24 | 1.12 | 1.28 | 1.28 | 1.09 | 1.07 | 1.04 | 1.00 | 46.74  | 5.21 |
| Q99LT0 | Protein dpy-30 homolog<br>OS=Mus musculus<br>GN=Dpy30 PE=1<br>SV=1 -<br>[DPY30_MOUSE]                 | 47.47 | 1 | 3  | 3  | 8   | 1.04 | 0.74 | 0.71 | 0.97 | 0.89 | 1.07 | 1.11 | 1.28 | 1.27 | 1.08 | 1.09 | 0.93 | 0.94 | 11.21  | 4.88 |
| Q499E5 | Storkhead-box protein 2<br>OS=Mus musculus<br>GN=Stox2 PE=2 SV=2 -<br>[STOX2_MOUSE]                   | 12.74 | 3 | 9  | 9  | 15  | 1.18 | 1.12 | 0.93 | 1.17 | 0.91 | 1.40 | 1.05 | 1.28 | 1.07 | 1.26 | 1.08 | 1.23 | 1.06 | 102.69 | 8.46 |
| E9PYX7 | Afadin<br>OS=Mus musculus<br>GN=Mllt4 PE=2<br>SV=1 -<br>[E9PYX7_MOUSE]                                | 24.23 | 3 | 1  | 32 | 81  | 1.32 | 0.96 | 0.73 | 1.16 | 0.87 | 1.01 | 0.76 | 1.28 | 0.97 | 1.14 | 0.87 | 1.22 | 0.92 | 188.79 | 6.42 |
| Q9CY50 | Translocon-associated protein subunit alpha<br>OS=Mus musculus<br>GN=Ssr1 PE=1 SV=1 -<br>[SSRA_MOUSE] | 9.09  | 1 | 2  | 2  | 9   | 0.94 | 1.07 | 1.09 | 1.14 | 1.22 | 1.33 | 1.43 | 1.28 | 1.39 | 1.15 | 1.26 | 1.03 | 1.09 | 32.05  | 4.45 |
| Q9QUN9 | Dickkopf-related protein 3<br>OS=Mus musculus<br>GN=Dkk3 PE=1<br>SV=1 -<br>[DKK3_MOUSE]               | 35.82 | 1 | 9  | 9  | 40  | 0.97 | 0.99 | 1.05 | 1.00 | 1.04 | 1.22 | 1.25 | 1.28 | 1.30 | 1.01 | 1.10 | 0.88 | 0.89 | 38.36  | 4.54 |
| Q6PGL7 | WASH complex subunit FAM21<br>OS=Mus musculus<br>GN=Fam21 PE=1<br>SV=1 -<br>[FAM21_MOUSE]             | 46.70 | 2 | 38 | 38 | 129 | 1.00 | 0.87 | 0.86 | 0.90 | 0.87 | 1.28 | 1.28 | 1.28 | 1.27 | 1.15 | 1.15 | 1.03 | 1.04 | 145.22 | 4.77 |
| Q5FW52 | Isoform 2 of Muscular LMNA-interacting protein<br>OS=Mus musculus<br>GN=Mlip -<br>[MLIP_MOUSE]        | 51.10 | 2 | 7  | 7  | 35  | 0.85 | 0.74 | 0.93 | 0.93 | 1.09 | 1.20 | 1.39 | 1.28 | 1.43 | 1.09 | 1.27 | 0.89 | 1.02 | 24.99  | 6.81 |

|          |                                                                                                                  |       |   |    |    |    |      |      |      |      |      |      |      |      |      |      |      |      |      |        |       |
|----------|------------------------------------------------------------------------------------------------------------------|-------|---|----|----|----|------|------|------|------|------|------|------|------|------|------|------|------|------|--------|-------|
| E9QAF9   | Protein TANC1<br>OS=Mus musculus<br>GN=Tanc1 PE=2<br>SV=1 -<br>[E9QAF9_MOUSE]                                    | 0.87  | 2 | 1  | 1  | 2  | 1.13 | 1.21 | 1.07 | 1.21 | 1.07 | 1.25 | 1.10 | 1.29 | 1.13 | 1.36 | 1.20 | 1.38 | 1.22 | 199.94 | 8.32  |
| Q3UHY7   | Coiled-coil domain<br>containing 32 OS=Mus<br>musculus GN=Ccdc32<br>PE=2 SV=1 -<br>[Q3UHY7_MOUSE]                | 34.64 | 3 | 3  | 3  | 11 | 1.05 | 0.77 | 0.73 | 0.86 | 0.83 | 1.20 | 1.13 | 1.29 | 1.22 | 1.10 | 1.06 | 0.99 | 0.95 | 19.85  | 4.78  |
| H3BJG4   | Protein Trip11<br>(Fragment) OS=Mus<br>musculus GN=Trip11<br>PE=2 SV=1 -<br>[H3BJG4_MOUSE]                       | 5.20  | 3 | 7  | 7  | 18 | 1.09 | 1.07 | 1.02 | 0.94 | 0.90 | 1.30 | 1.21 | 1.29 | 1.26 | 1.22 | 1.17 | 1.11 | 1.08 | 194.54 | 5.24  |
| Q3UIA2-4 | Isoform 4 of Rho<br>GTPase-activating<br>protein 17 OS=Mus<br>musculus GN=Arhgap17 -<br>[RHG17_MOUSE]            | 5.50  | 5 | 2  | 2  | 3  | 0.82 | 1.36 | 1.65 | 1.19 | 1.45 | 0.93 | 1.13 | 1.29 | 1.56 | 1.14 | 1.39 | 1.07 | 1.31 | 79.77  | 8.24  |
| P29533   | Vascular cell adhesion<br>protein 1 OS=Mus<br>musculus GN=Vcam1<br>PE=1 SV=1 -<br>[VCAM1_MOUSE]                  | 30.58 | 3 | 21 | 21 | 65 | 0.99 | 0.90 | 0.96 | 0.93 | 0.94 | 1.23 | 1.19 | 1.29 | 1.29 | 1.12 | 1.11 | 1.10 | 1.11 | 81.27  | 5.30  |
| Q6PAL7   | AT-hook DNA-binding<br>motif-containing<br>protein 1 OS=Mus<br>musculus GN=Ahdc1<br>PE=1 SV=1 -<br>[AHDC1_MOUSE] | 2.45  | 1 | 2  | 2  | 4  | 1.00 | 1.19 | 1.19 | 1.03 | 1.02 | 1.33 | 1.32 | 1.29 | 1.28 | 1.19 | 1.19 | 1.38 | 1.38 | 167.98 | 8.97  |
| Q6P8J7   | Creatine kinase S-type,<br>mitochondrial OS=Mus<br>musculus GN=Ckmt2<br>PE=1 SV=1 -<br>[KCRS_MOUSE]              | 10.98 | 1 | 1  | 3  | 11 | 1.15 | 0.81 | 0.70 | 0.86 | 0.75 | 1.50 | 1.30 | 1.29 | 1.12 | 1.24 | 1.08 | 1.03 | 0.90 | 47.44  | 8.40  |
| Q91WK1   | SPRY domain-<br>containing protein 4<br>OS=Mus musculus<br>GN=Spryd4 PE=2<br>SV=1 -<br>[SPRY4_MOUSE]             | 11.59 | 1 | 1  | 1  | 1  | 1.06 | 0.84 | 0.79 | 1.13 | 1.07 | 1.48 | 1.39 | 1.29 | 1.21 | 0.81 | 0.76 | 0.81 | 0.77 | 23.26  | 9.45  |
| Q68ED7   | CREB-regulated<br>transcription<br>coactivator 1 OS=Mus<br>musculus GN=Crtc1<br>PE=2 SV=1 -<br>[CRTC1_MOUSE]     | 18.10 | 1 | 6  | 6  | 93 | 0.98 | 1.02 | 1.03 | 0.91 | 0.92 | 1.32 | 1.34 | 1.29 | 1.30 | 1.24 | 1.18 | 1.11 | 1.13 | 66.90  | 6.05  |
| P43276   | Histone H1.5 OS=Mus<br>musculus GN=Hist1h1b PE=1<br>SV=2 -<br>[H15_MOUSE]                                        | 30.04 | 1 | 5  | 9  | 30 | 1.04 | 0.88 | 0.83 | 1.07 | 1.04 | 1.22 | 1.23 | 1.29 | 1.26 | 1.03 | 1.08 | 0.99 | 0.93 | 22.56  | 10.92 |
| Q8JZX9   | Cdc42 effector protein<br>2 OS=Mus musculus<br>GN=Cdc42ep2 PE=1<br>SV=1 -<br>[BORG1_MOUSE]                       | 48.60 | 1 | 5  | 5  | 15 | 1.13 | 1.18 | 0.99 | 1.03 | 0.94 | 1.21 | 1.22 | 1.29 | 1.17 | 1.25 | 1.19 | 1.19 | 1.15 | 22.98  | 5.54  |
| Q69ZF8   | E3 ubiquitin-protein<br>ligase MSL2 OS=Mus<br>musculus GN=Ms12<br>PE=2 SV=2 -<br>[MSL2_MOUSE]                    | 1.91  | 1 | 1  | 1  | 2  | 1.00 | 1.11 | 1.10 | 1.16 | 1.15 | 1.22 | 1.21 | 1.29 | 1.28 | 1.25 | 1.25 | 1.39 | 1.39 | 62.50  | 7.80  |

|          |                                                                                                                   |       |   |    |    |    |      |      |      |      |      |      |      |      |      |      |      |      |      |        |       |
|----------|-------------------------------------------------------------------------------------------------------------------|-------|---|----|----|----|------|------|------|------|------|------|------|------|------|------|------|------|------|--------|-------|
| Q62511-2 | Isoform 2 of E3 ubiquitin-protein ligase ZFP91 OS=Mus musculus GN=Zfp91 - [ZFP91_MOUSE]                           | 4.18  | 3 | 1  | 1  | 2  | 1.25 | 1.08 | 0.86 | 1.26 | 1.01 | 1.29 | 1.03 | 1.29 | 1.02 | 1.13 | 0.90 | 1.18 | 0.94 | 51.51  | 6.58  |
| Q924A2   | Protein capicua homolog OS=Mus musculus GN=Cic PE=1 SV=2 - [CIC_MOUSE]                                            | 8.57  | 5 | 14 | 14 | 24 | 1.00 | 1.03 | 1.12 | 0.96 | 0.97 | 1.26 | 1.34 | 1.29 | 1.31 | 1.09 | 1.20 | 1.03 | 1.08 | 257.97 | 8.02  |
| Q9D0R9   | WD repeat-containing protein 89 OS=Mus musculus GN=Wdr89 PE=2 SV=1 - [WDR89_MOUSE]                                | 8.03  | 1 | 1  | 1  | 3  | 0.87 | 1.06 | 1.21 | 0.95 | 0.85 | 1.17 | 1.40 | 1.29 | 1.47 | 1.25 | 1.51 | 0.87 | 0.98 | 42.44  | 5.66  |
| Q9D8W7   | OClA domain-containing protein 2 OS=Mus musculus GN=Ociad2 PE=2 SV=1 - [OCAD2_MOUSE]                              | 44.16 | 1 | 5  | 5  | 17 | 1.04 | 1.02 | 1.08 | 1.25 | 1.28 | 1.53 | 1.41 | 1.29 | 1.24 | 1.11 | 1.26 | 1.04 | 1.20 | 16.91  | 9.41  |
| F6TKE8   | Ly6/PLAUR domain-containing protein 1 (Fragment) OS=Mus musculus GN=Lypd1 PE=4 SV=1 - [F6TKE8_MOUSE]              | 14.63 | 4 | 1  | 1  | 9  | 1.53 | 1.37 | 0.92 | 1.11 | 0.77 | 1.38 | 0.93 | 1.29 | 0.85 | 1.51 | 0.95 | 1.76 | 1.17 | 9.07   | 4.88  |
| D3YUP8   | Inhibitor of growth protein 3 OS=Mus musculus GN=Ing3 PE=2 SV=1 - [D3YUP8_MOUSE]                                  | 7.80  | 3 | 2  | 2  | 4  | 0.95 | 0.99 | 1.03 | 0.90 | 0.94 | 1.24 | 1.29 | 1.29 | 1.35 | 1.06 | 1.12 | 1.07 | 1.12 | 45.53  | 5.63  |
| Q99N91   | 39S ribosomal protein L34, mitochondrial OS=Mus musculus GN=Mrpl34 PE=2 SV=1 - [RM34_MOUSE]                       | 25.00 | 1 | 2  | 2  | 4  | 0.94 | 1.09 | 1.15 | 1.05 | 1.12 | 1.24 | 1.31 | 1.29 | 1.37 | 1.22 | 1.30 | 1.15 | 1.23 | 10.52  | 11.81 |
| D3Z069   | Plectstrin homology-like domain family B member 2 (Fragment) OS=Mus musculus GN=Phldb2 PE=2 SV=1 - [D3Z069_MOUSE] | 0.88  | 3 | 1  | 1  | 2  | 2.55 | 3.39 | 1.33 | 0.75 | 0.29 | 0.89 | 0.35 | 1.29 | 0.51 | 1.03 | 0.47 | 0.93 | 0.36 | 127.10 | 6.27  |
| Q61818-2 | Isoform 2 of Retinoic acid-induced protein 1 OS=Mus musculus GN=Rai1 - [RAI1_MOUSE]                               | 5.65  | 3 | 7  | 8  | 26 | 1.13 | 1.04 | 0.92 | 1.09 | 0.97 | 1.35 | 1.19 | 1.29 | 1.23 | 1.24 | 1.14 | 1.14 | 1.01 | 195.96 | 8.87  |
| Q6IQX8   | Protein Zfp219 OS=Mus musculus GN=Zfp219 PE=2 SV=1 - [Q6IQX8_MOUSE]                                               | 5.37  | 1 | 3  | 3  | 4  | 1.10 | 1.44 | 1.41 | 1.14 | 1.03 | 1.26 | 1.17 | 1.29 | 1.22 | 1.32 | 1.20 | 1.24 | 1.11 | 77.75  | 9.17  |
| Q6P549   | Phosphatidylinositol 3,4,5-trisphosphate 5-phosphatase 2 OS=Mus musculus GN=Inpp1 PE=1 SV=1 - [SHIP2_MOUSE]       | 1.43  | 1 | 1  | 1  | 2  | 1.17 | 1.32 | 1.12 | 1.01 | 0.87 | 1.39 | 1.18 | 1.29 | 1.10 | 1.13 | 0.96 | 1.22 | 1.04 | 138.89 | 6.54  |

|          |                                                                                                           |       |   |    |    |     |      |      |      |      |      |      |      |      |      |      |      |      |      |        |       |
|----------|-----------------------------------------------------------------------------------------------------------|-------|---|----|----|-----|------|------|------|------|------|------|------|------|------|------|------|------|------|--------|-------|
| F6ZGR6   | Protein D430041D05Rik (Fragment) OS=Mus musculus GN=D430041D05Rik PE=4 SV=1 - [F6ZGR6_MOUSE]              | 12.16 | 2 | 1  | 13 | 46  | 1.28 | 1.04 | 0.81 | 1.18 | 0.92 | 1.32 | 1.03 | 1.29 | 1.00 | 1.09 | 0.85 | 1.13 | 0.88 | 181.02 | 9.38  |
| Q9D358   | Low molecular weight phosphotyrosine protein phosphatase OS=Mus musculus GN=Acp1 PE=1 SV=3 - [PPAC_MOUSE] | 45.57 | 1 | 1  | 4  | 39  | 1.05 | 1.37 | 1.30 | 1.01 | 0.96 | 1.30 | 1.23 | 1.29 | 1.22 | 1.25 | 1.19 | 1.49 | 1.42 | 18.18  | 6.74  |
| P97314   | Cysteine and glycine-rich protein 2 OS=Mus musculus GN=Csrp2 PE=1 SV=3 - [CSR2_MOUSE]                     | 35.23 | 1 | 5  | 5  | 15  | 1.07 | 1.05 | 0.96 | 1.03 | 0.91 | 1.06 | 1.01 | 1.29 | 1.11 | 1.34 | 1.16 | 1.00 | 0.98 | 20.91  | 8.62  |
| Q9D772   | Protein FAM219A OS=Mus musculus GN=Fam219a PE=2 SV=2 - [F219A_MOUSE]                                      | 50.32 | 2 | 1  | 4  | 27  | 0.97 | 1.15 | 1.18 | 1.07 | 1.10 | 1.21 | 1.23 | 1.29 | 1.33 | 1.27 | 1.30 | 1.10 | 1.14 | 17.45  | 4.68  |
| A6H6E2   | Multimerin-2 OS=Mus musculus GN=Mmm2 PE=2 SV=1 - [MMRN2_MOUSE]                                            | 6.79  | 1 | 4  | 4  | 7   | 0.98 | 1.17 | 1.06 | 0.94 | 0.96 | 0.88 | 0.68 | 1.29 | 0.93 | 1.01 | 0.81 | 0.93 | 0.75 | 105.14 | 5.57  |
| Q9J143-5 | Isoform 5 of RNA binding protein fox-1 homolog 1 OS=Mus musculus GN=Rbfox1 - [RFOX1_MOUSE]                | 20.91 | 3 | 1  | 7  | 23  | 0.90 | 0.96 | 1.12 | 0.86 | 0.97 | 1.25 | 1.38 | 1.29 | 1.50 | 1.12 | 1.31 | 1.11 | 1.28 | 40.26  | 5.99  |
| Q8BU11   | TOX high mobility group box family member 4 OS=Mus musculus GN=Tox4 PE=1 SV=3 - [TOX4_MOUSE]              | 12.44 | 8 | 6  | 6  | 16  | 1.08 | 0.89 | 0.83 | 1.04 | 0.91 | 1.38 | 1.30 | 1.29 | 1.15 | 1.18 | 1.08 | 1.03 | 0.91 | 65.92  | 5.01  |
| D3YVF0   | A-kinase anchor protein 5 OS=Mus musculus GN=Akap5 PE=2 SV=2 - [AKAP5_MOUSE]                              | 71.68 | 2 | 34 | 34 | 320 | 1.02 | 1.00 | 1.01 | 1.01 | 1.00 | 1.27 | 1.23 | 1.29 | 1.23 | 1.27 | 1.23 | 1.21 | 1.21 | 79.35  | 4.75  |
| Q8VCQ8   | Caldesmon 1 OS=Mus musculus GN=Cald1 PE=2 SV=1 - [Q8VCQ8_MOUSE]                                           | 33.21 | 8 | 1  | 18 | 72  | 1.14 | 1.17 | 1.03 | 1.03 | 0.91 | 1.22 | 1.07 | 1.29 | 1.13 | 1.29 | 1.13 | 1.23 | 1.08 | 60.42  | 7.37  |
| Q9R1C0   | Transcription initiation factor TFIID subunit 7 OS=Mus musculus GN=Taf7 PE=1 SV=1 - [TAF7_MOUSE]          | 3.52  | 1 | 1  | 1  | 1   | 1.07 | 1.21 | 1.13 | 0.99 | 0.93 | 1.19 | 1.11 | 1.29 | 1.21 | 1.24 | 1.16 | 1.36 | 1.27 | 39.10  | 5.33  |
| Q3UHB8   | Coiled-coil domain-containing protein 177 OS=Mus musculus GN=Cdc177 PE=1 SV=1 - [CC177_MOUSE]             | 22.95 | 1 | 12 | 12 | 42  | 1.02 | 1.08 | 1.09 | 1.04 | 1.01 | 1.23 | 1.15 | 1.29 | 1.26 | 1.19 | 1.13 | 1.15 | 1.08 | 79.81  | 10.80 |
| G3X8Q1   | Calcineurin binding protein 1, isoform CRA_a OS=Mus musculus GN=Cabin1 PE=4 SV=1 - [G3X8Q1_MOUSE]         | 1.74  | 1 | 2  | 2  | 6   | 0.99 | 1.47 | 1.48 | 1.05 | 1.05 | 1.26 | 1.26 | 1.29 | 1.30 | 1.17 | 1.18 | 1.10 | 1.10 | 243.02 | 6.01  |

|        |                                                                                                                           |       |   |   |    |     |      |      |      |      |      |      |      |      |      |      |      |      |      |       |      |
|--------|---------------------------------------------------------------------------------------------------------------------------|-------|---|---|----|-----|------|------|------|------|------|------|------|------|------|------|------|------|------|-------|------|
| Q8BHD8 | Protein-L-isoaspartate O-methyltransferase domain-containing protein 2 OS=Mus musculus GN=Pcmd2 PE=2 SV=1 - [PCMD2_MOUSE] | 5.01  | 1 | 1 | 1  | 2   | 1.25 | 3.35 | 2.66 | 1.13 | 0.90 | 1.51 | 1.19 | 1.29 | 1.03 | 1.13 | 0.90 | 1.11 | 0.89 | 40.73 | 6.46 |
| J3QPM4 | Cytokine receptor-like factor 3 OS=Mus musculus GN=Crlf3 PE=4 SV=1 - [J3QPM4_MOUSE]                                       | 18.99 | 4 | 1 | 1  | 2   | 1.19 | 1.19 | 1.00 | 0.97 | 0.81 | 1.16 | 0.97 | 1.29 | 1.09 | 1.17 | 0.99 | 1.03 | 0.87 | 9.15  | 9.66 |
| Q8R317 | Ubiquitin-1 OS=Mus musculus GN=Ubln1 PE=1 SV=1 - [UBQL1_MOUSE]                                                            | 32.47 | 1 | 1 | 11 | 111 | 0.53 | 0.81 | 1.52 | 0.68 | 1.28 | 0.84 | 1.56 | 1.29 | 2.42 | 0.75 | 1.40 | 0.85 | 1.60 | 61.94 | 4.94 |
| D3Z7J7 | Deoxyhypusine hydroxylase (Fragment) OS=Mus musculus GN=Dohh PE=2 SV=1 - [D3Z7J7_MOUSE]                                   | 10.64 | 4 | 1 | 1  | 1   | 1.07 | 0.94 | 0.88 | 0.93 | 0.87 | 1.31 | 1.22 | 1.29 | 1.21 | 1.10 | 1.03 | 1.15 | 1.08 | 20.51 | 4.94 |
| E9QMV2 | Protein Gm6314 OS=Mus musculus GN=Abracl PE=4 SV=1 - [E9QMV2_MOUSE]                                                       | 11.11 | 2 | 1 | 1  | 2   | 1.07 | 1.28 | 1.19 | 0.89 | 0.83 | 1.16 | 1.08 | 1.30 | 1.20 | 1.02 | 0.96 | 1.01 | 0.95 | 9.05  | 5.80 |
| Q9WU84 | Copper chaperone for superoxide dismutase OS=Mus musculus GN=Ccs PE=1 SV=1 - [CCS_MOUSE]                                  | 8.03  | 1 | 2 | 2  | 4   | 0.95 | 1.01 | 1.05 | 0.93 | 0.97 | 1.22 | 1.27 | 1.30 | 1.35 | 1.17 | 1.23 | 1.23 | 1.29 | 28.89 | 6.10 |
| O08600 | Endonuclease G, mitochondrial OS=Mus musculus GN=Endog PE=2 SV=1 - [NUCG_MOUSE]                                           | 9.18  | 1 | 2 | 2  | 4   | 0.93 | 1.12 | 1.20 | 1.16 | 1.24 | 1.30 | 1.38 | 1.30 | 1.38 | 1.39 | 1.49 | 1.36 | 1.46 | 32.17 | 9.54 |
| P12025 | Midkine OS=Mus musculus GN=Mdk PE=2 SV=2 - [MK_MOUSE]                                                                     | 7.14  | 1 | 1 | 1  | 2   | 1.21 | 1.15 | 0.95 | 1.02 | 0.84 | 1.55 | 1.28 | 1.30 | 1.07 | 1.47 | 1.22 | 1.62 | 1.34 | 15.42 | 9.70 |
| A2AGL5 | Apoptosis, caspase activation inhibitor, isoform CRA_c OS=Mus musculus GN=Aven PE=4 SV=1 - [A2AGL5_MOUSE]                 | 36.41 | 2 | 5 | 5  | 9   | 1.03 | 0.89 | 0.89 | 0.94 | 0.95 | 1.14 | 1.16 | 1.30 | 1.16 | 1.17 | 1.03 | 0.97 | 0.94 | 24.06 | 4.59 |
| Q8CB77 | Transcription elongation factor B polypeptide 3 OS=Mus musculus GN=Tceb3 PE=1 SV=3 - [ELOA1_MOUSE]                        | 4.79  | 1 | 4 | 4  | 11  | 1.06 | 0.99 | 0.92 | 0.94 | 0.92 | 1.30 | 1.29 | 1.30 | 1.25 | 1.17 | 1.11 | 1.19 | 1.13 | 87.11 | 9.61 |
| P50571 | Gamma-aminobutyric acid receptor subunit beta-1 OS=Mus musculus GN=Gabbr1 PE=1 SV=1 - [GBRB1_MOUSE]                       | 11.60 | 2 | 1 | 4  | 9   | 1.49 | 1.69 | 1.13 | 1.41 | 0.95 | 1.14 | 0.76 | 1.30 | 0.87 | 1.12 | 0.75 | 1.45 | 0.97 | 54.07 | 8.78 |

|          |                                                                                                                          |       |    |    |    |     |      |      |      |      |      |      |      |      |      |      |      |      |      |        |      |
|----------|--------------------------------------------------------------------------------------------------------------------------|-------|----|----|----|-----|------|------|------|------|------|------|------|------|------|------|------|------|------|--------|------|
| Q35730-3 | Isoform 3 of E3 ubiquitin-protein ligase RING1 OS=Mus musculus GN=Ring1 - [RING1_MOUSE]                                  | 15.30 | 2  | 2  | 2  | 2   | 1.82 | 1.86 | 1.02 | 0.97 | 0.82 | 0.77 | 0.42 | 1.30 | 1.10 | 0.77 | 0.42 | 1.30 | 1.11 | 20.79  | 8.19 |
| Q9JL19   | Nuclear receptor coactivator 6 OS=Mus musculus GN=Ncoa6 PE=1 SV=1 - [NCOA6_MOUSE]                                        | 3.77  | 3  | 4  | 4  | 13  | 1.06 | 1.04 | 0.89 | 0.97 | 0.85 | 1.41 | 1.24 | 1.30 | 1.18 | 1.24 | 1.13 | 1.24 | 1.11 | 219.52 | 9.32 |
| Q8K3J1   | NADH dehydrogenase [ubiquinone] iron-sulfur protein 8, mitochondrial OS=Mus musculus GN=Ndufs8 PE=1 SV=1 - [NDUS8_MOUSE] | 41.98 | 1  | 8  | 8  | 198 | 1.01 | 0.90 | 0.88 | 0.97 | 0.98 | 1.26 | 1.28 | 1.30 | 1.30 | 1.21 | 1.20 | 1.13 | 1.12 | 24.02  | 6.21 |
| E0CY18   | AN1-type zinc finger protein 2B (Fragment) OS=Mus musculus GN=Zfand2b PE=2 SV=1 - [E0CY18_MOUSE]                         | 17.43 | 2  | 2  | 2  | 15  | 1.07 | 1.00 | 0.93 | 0.89 | 0.90 | 1.17 | 1.09 | 1.30 | 1.21 | 1.19 | 1.14 | 1.24 | 1.16 | 23.68  | 7.72 |
| Q80Z37   | E3 ubiquitin-protein ligase Topors OS=Mus musculus GN=Topors PE=1 SV=1 - [TOPRS_MOUSE]                                   | 1.45  | 1  | 1  | 1  | 2   | 0.96 | 1.22 | 1.27 | 1.06 | 1.11 | 1.10 | 1.14 | 1.30 | 1.35 | 1.17 | 1.22 | 1.19 | 1.25 | 117.01 | 9.52 |
| Q5SUG2   | Protein Cacna1g OS=Mus musculus GN=Cacna1g PE=2 SV=1 - [Q5SUG2_MOUSE]                                                    | 0.97  | 11 | 1  | 1  | 2   | 0.89 | 1.01 | 1.13 | 1.02 | 1.15 | 1.06 | 1.18 | 1.30 | 1.46 | 1.10 | 1.24 | 0.86 | 0.97 | 241.29 | 7.23 |
| Q8C624   | Uncharacterized protein C16orf55 homolog OS=Mus musculus PE=2 SV=1 - [CP055_MOUSE]                                       | 13.64 | 1  | 1  | 1  | 1   | 1.04 | 1.02 | 0.98 | 0.92 | 0.88 | 1.13 | 1.08 | 1.30 | 1.25 | 1.13 | 1.09 | 0.95 | 0.92 | 15.03  | 9.28 |
| Q8C161   | BAG family molecular chaperone regulator 4 OS=Mus musculus GN=Bag4 PE=1 SV=2 - [BAG4_MOUSE]                              | 28.45 | 1  | 8  | 8  | 30  | 1.06 | 0.98 | 0.92 | 0.98 | 0.90 | 1.17 | 1.15 | 1.30 | 1.23 | 1.25 | 1.09 | 1.13 | 1.11 | 49.06  | 5.34 |
| Q3UNH4   | G protein-regulated inducer of neurite outgrowth 1 OS=Mus musculus GN=Gprin1 PE=1 SV=2 - [GRIN1_MOUSE]                   | 66.74 | 1  | 62 | 62 | 341 | 1.08 | 0.94 | 0.89 | 0.94 | 0.88 | 1.32 | 1.24 | 1.30 | 1.20 | 1.19 | 1.11 | 1.11 | 1.05 | 95.44  | 7.93 |
| Q9ERE8   | Mesoderm development candidate 1 OS=Mus musculus GN=Mesdc1 PE=1 SV=1 - [MESD1_MOUSE]                                     | 3.04  | 1  | 1  | 1  | 1   | 1.23 | 1.32 | 1.07 | 0.95 | 0.77 | 1.54 | 1.24 | 1.30 | 1.05 | 0.64 | 0.52 | 0.98 | 0.80 | 37.76  | 8.15 |
| B2RX88-2 | Isoform 2 of Centrosome and spindle pole associated protein 1 OS=Mus musculus GN=Csppl1 - [CSPPP1_MOUSE]                 | 3.42  | 3  | 2  | 2  | 3   | 1.10 | 1.55 | 1.42 | 1.21 | 1.11 | 1.53 | 1.39 | 1.30 | 1.18 | 1.09 | 0.99 | 1.37 | 1.25 | 131.13 | 8.44 |

|          |                                                                                                                                   |       |    |    |    |    |      |      |      |      |      |      |      |      |      |      |      |      |      |        |      |
|----------|-----------------------------------------------------------------------------------------------------------------------------------|-------|----|----|----|----|------|------|------|------|------|------|------|------|------|------|------|------|------|--------|------|
| Q3THG9   | Alanyl-tRNA editing protein Aarsd1<br>OS=Mus musculus<br>GN=Aarsd1 PE=1<br>SV=2 -<br>[AASD1_MOUSE]                                | 9.71  | 3  | 3  | 3  | 9  | 1.00 | 1.15 | 1.04 | 1.07 | 1.08 | 1.40 | 1.44 | 1.30 | 1.34 | 1.28 | 1.32 | 1.38 | 1.30 | 44.94  | 6.42 |
| Q2M3X8   | Phosphatase and actin regulator 1 OS=Mus musculus<br>GN=Phactr1 PE=1 SV=1 -<br>[PHAR1_MOUSE]                                      | 40.00 | 5  | 13 | 16 | 84 | 1.06 | 1.07 | 1.05 | 1.01 | 1.00 | 1.27 | 1.30 | 1.30 | 1.31 | 1.22 | 1.20 | 1.33 | 1.30 | 66.24  | 6.96 |
| E9Q7F2   | E3 ubiquitin-protein ligase RNF169<br>OS=Mus musculus<br>GN=Rnf169 PE=2<br>SV=1 -<br>[RN169_MOUSE]                                | 2.31  | 1  | 1  | 1  | 2  | 1.15 | 2.00 | 1.73 | 1.01 | 0.88 | 1.19 | 1.03 | 1.30 | 1.13 | 1.36 | 1.19 | 1.46 | 1.27 | 75.75  | 9.35 |
| Q810B7   | SLIT and NTRK-like protein 5 OS=Mus musculus<br>GN=Slitrk5 PE=2 SV=1 -<br>[SLIK5_MOUSE]                                           | 6.58  | 1  | 4  | 4  | 10 | 1.07 | 1.17 | 1.07 | 0.97 | 0.91 | 1.30 | 1.19 | 1.30 | 1.39 | 1.07 | 1.13 | 1.00 | 0.95 | 107.10 | 6.93 |
| Q9J110   | Serine/threonine-protein kinase 3<br>OS=Mus musculus<br>GN=Stk3 PE=1 SV=1 -<br>[STK3_MOUSE]                                       | 7.65  | 4  | 1  | 3  | 4  | 0.99 | 0.96 | 0.96 | 0.86 | 0.86 | 0.99 | 0.99 | 1.30 | 1.31 | 1.09 | 1.10 | 1.11 | 1.11 | 56.82  | 4.98 |
| Q6DV40   | LEM domain-containing protein 2<br>OS=Mus musculus<br>GN=Lemd2 PE=1<br>SV=1 -<br>[LEMD2_MOUSE]                                    | 3.33  | 1  | 1  | 1  | 2  | 1.02 | 1.40 | 1.37 | 0.76 | 0.74 | 1.21 | 1.18 | 1.30 | 1.28 | 1.20 | 1.18 | 1.21 | 1.19 | 57.47  | 9.01 |
| P48725-3 | Isoform 3 of Pericentrin<br>OS=Mus musculus<br>GN=Pcnt -<br>[PCNT_MOUSE]                                                          | 0.88  | 3  | 1  | 1  | 2  | 1.04 | 0.82 | 0.79 | 0.91 | 0.88 | 1.03 | 0.99 | 1.30 | 1.25 | 1.16 | 1.12 | 1.02 | 0.99 | 284.41 | 5.08 |
| Q8C181   | Muscleblind-like protein 2 OS=Mus musculus<br>GN=Mbnl2 PE=2 SV=2 -<br>[MBNL2_MOUSE]                                               | 19.57 | 4  | 1  | 5  | 8  | 0.85 | 0.77 | 0.91 | 0.96 | 1.12 | 1.26 | 1.47 | 1.30 | 1.52 | 1.05 | 1.24 | 0.94 | 1.10 | 40.13  | 9.00 |
| P31230   | Aminoacyl tRNA synthase complex-interacting multifunctional protein 1 OS=Mus musculus<br>GN=Aimp1 PE=1<br>SV=2 -<br>[AIMP1_MOUSE] | 54.52 | 6  | 12 | 13 | 83 | 0.99 | 0.96 | 0.97 | 0.88 | 0.93 | 1.25 | 1.31 | 1.30 | 1.31 | 1.17 | 1.19 | 1.14 | 1.19 | 33.98  | 8.35 |
| E9PX84   | Disabled homolog 2 OS=Mus musculus<br>GN=Dab2 PE=2 SV=1 -<br>[E9PX84_MOUSE]                                                       | 7.02  | 10 | 3  | 3  | 5  | 1.23 | 0.88 | 0.68 | 0.97 | 0.77 | 1.20 | 0.93 | 1.30 | 1.01 | 0.89 | 0.83 | 1.08 | 0.91 | 56.47  | 6.67 |
| E9PV80   | Nuclear receptor coactivator 2 OS=Mus musculus<br>GN=Ncoa2 PE=4 SV=1 -<br>[E9PV80_MOUSE]                                          | 0.72  | 2  | 1  | 1  | 2  | 1.10 | 1.30 | 1.18 | 1.10 | 1.00 | 1.41 | 1.28 | 1.30 | 1.19 | 1.54 | 1.41 | 1.23 | 1.13 | 151.26 | 6.62 |
| E9PZM7   | Protein Scaf11 OS=Mus musculus<br>GN=Scaf11 PE=2<br>SV=1 -<br>[E9PZM7_MOUSE]                                                      | 5.70  | 1  | 6  | 7  | 26 | 1.13 | 1.00 | 0.88 | 1.05 | 0.95 | 1.21 | 1.04 | 1.30 | 1.09 | 1.16 | 1.00 | 1.08 | 1.02 | 162.00 | 6.77 |



|          |                                                                                                                |       |   |    |    |     |      |      |      |      |      |      |      |      |      |      |      |      |      |        |      |
|----------|----------------------------------------------------------------------------------------------------------------|-------|---|----|----|-----|------|------|------|------|------|------|------|------|------|------|------|------|------|--------|------|
| A2A6A1   | G patch domain-containing protein 8<br>OS=Mus musculus<br>GN=Cpatch8 PE=2<br>SV=1 -<br>[GPTC8_MOUSE]           | 4.25  | 1 | 4  | 4  | 8   | 1.08 | 1.24 | 1.15 | 1.04 | 0.97 | 1.27 | 1.04 | 1.31 | 1.13 | 1.09 | 1.07 | 1.14 | 1.05 | 164.89 | 7.64 |
| D3YZ72   | Complexin-1<br>(Fragment) OS=Mus musculus<br>GN=Cplx1 PE=2 SV=1 -<br>[D3YZ72_MOUSE]                            | 48.05 | 1 | 1  | 4  | 37  | 1.13 | 1.10 | 1.29 | 1.22 | 0.89 | 1.36 | 1.26 | 1.31 | 1.25 | 1.40 | 1.17 | 1.51 | 1.14 | 8.84   | 5.06 |
| O89084   | cAMP-specific 3',5'-cyclic phosphodiesterase 4A<br>OS=Mus musculus<br>GN=Pde4a PE=2<br>SV=2 -<br>[PDE4A_MOUSE] | 5.92  | 3 | 2  | 4  | 11  | 1.11 | 0.92 | 0.83 | 0.86 | 0.77 | 1.19 | 1.07 | 1.31 | 1.17 | 1.10 | 0.99 | 1.01 | 0.91 | 93.50  | 5.26 |
| Q9WUN8   | Transcription factor LBX2 OS=Mus musculus<br>GN=Lbx2 PE=2 SV=1 -<br>[LBX2_MOUSE]                               | 14.36 | 1 | 1  | 1  | 1   | 1.14 | 0.87 | 0.76 | 1.03 | 0.91 | 1.29 | 1.13 | 1.31 | 1.15 | 1.14 | 1.01 | 1.03 | 0.91 | 20.90  | 5.68 |
| P61807   | Stannin OS=Mus musculus<br>GN=Snn PE=1 SV=1 -<br>[SNN_MOUSE]                                                   | 12.50 | 1 | 1  | 1  | 2   | 1.01 | 1.41 | 1.39 | 0.96 | 0.95 | 0.99 | 0.97 | 1.31 | 1.29 | 1.11 | 1.10 | 1.33 | 1.32 | 9.49   | 5.31 |
| F7AIV2   | SH2 domain-containing adapter protein F (Fragment)<br>OS=Mus musculus<br>GN=Shf PE=4 SV=1 -<br>[F7AIV2_MOUSE]  | 45.88 | 8 | 7  | 7  | 14  | 1.01 | 0.82 | 0.74 | 1.00 | 0.93 | 1.22 | 1.15 | 1.31 | 1.25 | 1.10 | 1.04 | 1.09 | 0.98 | 37.74  | 5.05 |
| Q45VK7   | Cytoplasmic dynein 2 heavy chain 1 OS=Mus musculus<br>GN=Dync2h1 PE=1<br>SV=1 -<br>[DYHC2_MOUSE]               | 1.23  | 2 | 2  | 2  | 2   | 1.35 | 1.02 | 0.75 | 1.31 | 0.97 | 1.22 | 0.90 | 1.31 | 0.97 | 1.12 | 0.83 | 1.14 | 0.85 | 492.03 | 6.60 |
| P20065-2 | Isoform Short of Thymosin beta-4<br>OS=Mus musculus<br>GN=Tmsb4x -<br>[TYB4_MOUSE]                             | 45.45 | 4 | 3  | 5  | 194 | 0.36 | 0.62 | 2.00 | 0.80 | 2.27 | 1.01 | 3.32 | 1.31 | 5.05 | 1.19 | 4.28 | 0.57 | 1.61 | 5.05   | 5.06 |
| B9EK15   | Casitas B-lineage lymphoma b OS=Mus musculus<br>GN=Cblb PE=1 SV=1 -<br>[B9EK15_MOUSE]                          | 3.62  | 3 | 1  | 2  | 3   | 1.26 | 1.41 | 1.12 | 0.93 | 0.74 | 1.06 | 0.84 | 1.31 | 1.03 | 1.34 | 1.07 | 1.60 | 1.27 | 104.53 | 8.02 |
| Q6IFZ6   | Keratin, type II cytoskeletal 1b<br>OS=Mus musculus<br>GN=Krt77 PE=1 SV=1 -<br>[K2C1B_MOUSE]                   | 5.42  | 3 | 1  | 3  | 10  | 1.23 | 1.04 | 0.85 | 2.96 | 2.40 | 0.76 | 0.61 | 1.31 | 1.06 | 1.50 | 1.22 | 1.70 | 1.38 | 61.32  | 8.02 |
| A2CI98   | Dystrotelin OS=Mus musculus<br>GN=Dytn PE=2 SV=1 -<br>[DYTN_MOUSE]                                             | 2.76  | 1 | 1  | 1  | 7   | 1.09 | 0.66 | 0.62 | 0.96 | 0.90 | 1.19 | 1.07 | 1.31 | 1.12 | 1.07 | 0.99 | 0.94 | 0.86 | 74.01  | 9.19 |
| P08226   | Apolipoprotein E OS=Mus musculus<br>GN=ApoE PE=1 SV=2 -<br>[APOE_MOUSE]                                        | 50.80 | 4 | 18 | 18 | 74  | 1.08 | 1.11 | 0.99 | 1.02 | 0.92 | 1.47 | 1.28 | 1.31 | 1.20 | 1.43 | 1.17 | 1.31 | 1.23 | 35.84  | 5.68 |
| Q5GH67   | XK-related protein 4 OS=Mus musculus<br>GN=Xkr4 PE=1 SV=1 -<br>[XKR4_MOUSE]                                    | 5.41  | 1 | 2  | 2  | 2   | 0.76 | 1.11 | 1.46 | 1.06 | 1.40 | 0.99 | 1.30 | 1.31 | 1.72 | 1.29 | 1.70 | 1.15 | 1.52 | 71.46  | 8.03 |

|          |                                                                                                                     |       |   |    |    |     |      |      |      |      |      |      |      |      |      |      |      |      |      |        |       |
|----------|---------------------------------------------------------------------------------------------------------------------|-------|---|----|----|-----|------|------|------|------|------|------|------|------|------|------|------|------|------|--------|-------|
| Q8R5H6   | Wiskott-Aldrich syndrome protein family member 1 OS=Mus musculus GN=Wasf1 PE=1 SV=2 - [WASF1_MOUSE]                 | 33.81 | 1 | 14 | 16 | 66  | 0.93 | 0.87 | 1.01 | 0.87 | 0.94 | 1.25 | 1.29 | 1.31 | 1.35 | 1.12 | 1.18 | 1.13 | 1.10 | 61.47  | 6.37  |
| P70335-2 | Isoform 2 of Rho-associated protein kinase 1 OS=Mus musculus GN=Rock1 - [ROCK1_MOUSE]                               | 6.50  | 2 | 3  | 8  | 25  | 1.06 | 1.10 | 0.94 | 0.97 | 0.90 | 1.01 | 0.98 | 1.31 | 1.24 | 1.03 | 0.96 | 1.09 | 0.98 | 157.94 | 5.86  |
| Q8R149-2 | Isoform 2 of BUD13 homolog OS=Mus musculus GN=Bud13 - [BUD13_MOUSE]                                                 | 4.28  | 2 | 2  | 2  | 4   | 1.13 | 1.22 | 1.08 | 1.11 | 0.98 | 1.23 | 1.08 | 1.31 | 1.15 | 1.33 | 1.18 | 1.32 | 1.17 | 68.60  | 9.98  |
| Q3TKY6   | Peptidyl-prolyl cis-trans isomerase CWC27 homolog OS=Mus musculus GN=Cwc27 PE=1 SV=1 - [CWC27_MOUSE]                | 17.06 | 1 | 5  | 5  | 15  | 0.99 | 1.14 | 1.07 | 1.01 | 0.95 | 1.23 | 1.29 | 1.31 | 1.41 | 1.14 | 1.19 | 1.09 | 1.13 | 53.51  | 5.53  |
| Q9R0Q7   | Prostaglandin E synthase 3 OS=Mus musculus GN=Ptges3 PE=1 SV=1 - [TEBP_MOUSE]                                       | 75.00 | 2 | 10 | 10 | 197 | 1.03 | 0.80 | 0.76 | 0.90 | 0.86 | 1.28 | 1.20 | 1.31 | 1.27 | 1.12 | 1.09 | 1.12 | 1.06 | 18.71  | 4.55  |
| Q80VY2-  | Isoform 2 of Protein FAM212B OS=Mus musculus GN=Fam212b - [F212B_MOUSE]                                             | 4.98  | 2 | 1  | 1  | 2   | 1.06 | 0.99 | 0.93 | 1.06 | 1.00 | 1.37 | 1.28 | 1.31 | 1.23 | 1.34 | 1.27 | 1.08 | 1.02 | 30.84  | 8.16  |
| Q9CQA6   | Coiled-coil-helix-coiled-coil-helix domain-containing protein 1 OS=Mus musculus GN=Chchd1 PE=2 SV=1 - [CHCH1_MOUSE] | 39.83 | 1 | 3  | 3  | 7   | 0.93 | 0.59 | 0.69 | 0.83 | 0.89 | 1.28 | 1.39 | 1.31 | 1.37 | 1.16 | 1.22 | 1.06 | 1.11 | 13.60  | 10.15 |
| Q9D2R6   | Cytochrome c oxidase assembly protein 3 homolog, mitochondrial OS=Mus musculus GN=Coa3 PE=2 SV=1 - [COA3_MOUSE]     | 33.33 | 2 | 4  | 4  | 9   | 1.09 | 1.03 | 0.95 | 1.18 | 0.96 | 1.32 | 1.13 | 1.31 | 1.16 | 1.22 | 1.12 | 1.22 | 1.10 | 11.98  | 9.86  |
| Q8K0X8   | Fasciculation and elongation protein zeta-1 OS=Mus musculus GN=Fez1 PE=1 SV=2 - [FEZ1_MOUSE]                        | 19.39 | 5 | 7  | 7  | 21  | 0.97 | 0.92 | 0.96 | 0.87 | 0.87 | 1.26 | 1.30 | 1.31 | 1.28 | 1.12 | 1.20 | 1.10 | 1.17 | 45.19  | 4.36  |
| Q9JJ94   | Sjogren syndrome nuclear autoantigen 1 homolog OS=Mus musculus GN=Ssna1 PE=1 SV=1 - [SSNA1_MOUSE]                   | 7.56  | 1 | 1  | 1  | 5   | 1.10 | 0.76 | 0.67 | 0.92 | 0.83 | 1.30 | 1.12 | 1.31 | 1.14 | 1.17 | 1.09 | 1.17 | 1.02 | 13.55  | 5.68  |
| I3ITR1   | MCG50313 OS=Mus musculus GN=AK157302 PE=4 SV=1 - [I3ITR1_MOUSE]                                                     | 31.78 | 2 | 3  | 3  | 8   | 1.04 | 0.88 | 0.83 | 1.06 | 0.99 | 1.48 | 1.42 | 1.31 | 1.25 | 1.12 | 1.12 | 1.18 | 1.18 | 14.21  | 8.85  |
| Q3UHU5-  | Isoform 3 of Protein SOGA2 OS=Mus musculus GN=Soga2 - [SOGA2_MOUSE]                                                 | 14.37 | 5 | 20 | 23 | 44  | 0.90 | 1.07 | 1.13 | 0.96 | 1.06 | 1.23 | 1.31 | 1.31 | 1.44 | 1.09 | 1.17 | 1.06 | 1.11 | 207.98 | 6.18  |

|        |                                                                                                                                        |       |    |   |   |    |      |      |      |      |      |      |      |      |      |      |      |      |      |        |       |
|--------|----------------------------------------------------------------------------------------------------------------------------------------|-------|----|---|---|----|------|------|------|------|------|------|------|------|------|------|------|------|------|--------|-------|
| Q8K1J5 | Protein SDE2 homolog<br>OS=Mus musculus<br>GN=Sde2 PE=1 SV=1 -<br>[SDE2_MOUSE]                                                         | 4.46  | 1  | 2 | 2 | 6  | 1.13 | 0.83 | 0.85 | 1.04 | 1.02 | 1.33 | 1.17 | 1.31 | 1.16 | 1.17 | 1.04 | 1.12 | 0.98 | 48.55  | 5.66  |
| Q9ERR7 | 15 kDa selenoprotein<br>OS=Mus musculus<br>GN=Sep15 PE=1<br>SV=3 -<br>[SEP15_MOUSE]                                                    | 23.46 | 1  | 3 | 3 | 17 | 0.91 | 0.93 | 0.99 | 0.92 | 1.06 | 1.21 | 1.40 | 1.31 | 1.41 | 1.15 | 1.28 | 1.07 | 1.24 | 17.80  | 5.35  |
| Q91VC7 | Protein phosphatase 1<br>regulatory subunit 14A<br>OS=Mus musculus<br>GN=Ppp1r14a PE=2<br>SV=1 -<br>[PP14A_MOUSE]                      | 57.14 | 1  | 5 | 5 | 24 | 0.98 | 0.93 | 1.00 | 0.92 | 0.99 | 1.36 | 1.39 | 1.31 | 1.27 | 1.15 | 1.20 | 1.09 | 1.04 | 16.64  | 7.34  |
| D3Z7C0 | 39S ribosomal protein<br>L40, mitochondrial<br>OS=Mus musculus<br>GN=Mrlp40 PE=2<br>SV=1 -<br>[D3Z7C0_MOUSE]                           | 61.73 | 2  | 9 | 9 | 34 | 1.13 | 1.04 | 0.94 | 1.02 | 0.93 | 1.28 | 1.12 | 1.31 | 1.10 | 1.19 | 1.03 | 1.15 | 1.03 | 19.37  | 9.19  |
| Q9D198 | Pre-mRNA-splicing<br>factor SYF2 OS=Mus<br>musculus GN=Syf2<br>PE=2 SV=1 -<br>[SYF2_MOUSE]                                             | 11.98 | 1  | 3 | 3 | 4  | 1.06 | 0.75 | 0.69 | 0.99 | 1.04 | 1.20 | 1.26 | 1.31 | 1.38 | 0.91 | 0.92 | 0.89 | 0.82 | 28.69  | 8.66  |
| D3YX49 | Protein Zfp384<br>OS=Mus musculus<br>GN=Zfp384 PE=2<br>SV=1 -<br>[D3YX49_MOUSE]                                                        | 2.56  | 5  | 1 | 1 | 2  | 1.08 | 1.59 | 1.46 | 1.07 | 0.99 | 1.17 | 1.08 | 1.31 | 1.21 | 1.17 | 1.08 | 1.51 | 1.40 | 50.86  | 8.56  |
| Q8K2D3 | Enhancer of mRNA-<br>decapping protein 3<br>OS=Mus musculus<br>GN=Edc3 PE=2 SV=1 -<br>[EDC3_MOUSE]                                     | 5.71  | 1  | 2 | 2 | 4  | 1.15 | 1.23 | 1.06 | 1.16 | 1.01 | 1.40 | 1.21 | 1.31 | 1.14 | 1.22 | 1.06 | 1.26 | 1.09 | 55.92  | 7.09  |
| F6S0D5 | Protein<br>0610010K14Rik<br>(Fragment) OS=Mus<br>musculus<br>GN=0610010K14Rik<br>PE=4 SV=1 -<br>[F6S0D5_MOUSE]                         | 20.00 | 10 | 2 | 2 | 4  | 1.05 | 0.89 | 0.85 | 0.90 | 0.85 | 1.18 | 1.12 | 1.31 | 1.25 | 1.16 | 1.10 | 1.17 | 1.12 | 8.53   | 10.07 |
| Q9JMF3 | Guanine nucleotide-<br>binding protein<br>G(I)G(S)G(O) subunit<br>gamma-13 OS=Mus<br>musculus GN=Gng13<br>PE=3 SV=1 -<br>[GBG13_MOUSE] | 47.76 | 1  | 4 | 4 | 19 | 1.18 | 0.99 | 0.87 | 1.14 | 0.97 | 1.51 | 1.23 | 1.31 | 1.13 | 1.22 | 1.03 | 1.25 | 1.01 | 7.97   | 5.45  |
| Q8K2T8 | RNA polymerase II-<br>associated factor 1<br>homolog OS=Mus<br>musculus GN=Paf1<br>PE=2 SV=1 -<br>[PAF1_MOUSE]                         | 22.24 | 1  | 9 | 9 | 22 | 1.03 | 0.87 | 0.75 | 0.88 | 0.86 | 1.43 | 1.30 | 1.31 | 1.28 | 1.28 | 1.27 | 1.09 | 1.15 | 60.48  | 4.65  |
| E9Q7P9 | Protein Cdhr2<br>OS=Mus musculus<br>GN=Cdhr2 PE=2<br>SV=1 -<br>[E9Q7P9_MOUSE]                                                          | 0.69  | 1  | 1 | 1 | 5  | 0.98 | 1.14 | 1.17 | 1.03 | 1.03 | 1.23 | 1.22 | 1.31 | 1.37 | 1.21 | 1.26 | 1.34 | 1.33 | 142.55 | 4.44  |

|          |                                                                                                                    |       |   |   |    |      |      |      |      |       |      |      |      |      |      |      |      |      |      |        |       |
|----------|--------------------------------------------------------------------------------------------------------------------|-------|---|---|----|------|------|------|------|-------|------|------|------|------|------|------|------|------|------|--------|-------|
| P62315   | Small nuclear ribonucleoprotein Sm D1 OS=Mus musculus GN=Snrpd1 PE=1 SV=1 - [SMD1_MOUSE]                           | 16.81 | 1 | 1 | 1  | 2    | 1.06 | 1.21 | 1.16 | 1.22  | 1.18 | 1.12 | 1.04 | 1.32 | 1.27 | 1.27 | 1.20 | 1.41 | 1.36 | 13.27  | 11.56 |
| Q8QZT2   | Centriole, cilia and spindle-associated protein OS=Mus musculus GN=Ccsap PE=2 SV=1 - [CCSAP_MOUSE]                 | 46.83 | 1 | 9 | 9  | 28   | 0.97 | 0.91 | 0.86 | 0.96  | 0.95 | 1.29 | 1.22 | 1.32 | 1.25 | 1.09 | 1.08 | 1.07 | 1.06 | 28.36  | 9.22  |
| A6H8H2   | DENN domain-containing protein 4C OS=Mus musculus GN=Dennd4c PE=1 SV=1 - [DEN4C_MOUSE]                             | 0.94  | 2 | 1 | 1  | 2    | 1.23 | 1.21 | 0.98 | 1.16  | 0.94 | 1.24 | 1.00 | 1.32 | 1.07 | 0.89 | 0.73 | 1.09 | 0.89 | 211.32 | 6.40  |
| P60879-2 | Isoform 2 of Synaptosomal-associated protein 25 OS=Mus musculus GN=Snap25 - [SNP25_MOUSE]                          | 72.33 | 1 | 3 | 20 | 1162 | 0.89 | 0.86 | 1.01 | 1.00  | 1.15 | 1.30 | 1.48 | 1.32 | 1.49 | 1.33 | 1.55 | 1.16 | 1.36 | 23.32  | 4.86  |
| Q3TSG4   | RNA demethylase ALKBH5 OS=Mus musculus GN=Alkbh5 PE=1 SV=2 - [ALKB5_MOUSE]                                         | 4.30  | 1 | 1 | 1  | 4    | 1.66 | 1.04 | 0.62 | 1.09  | 0.66 | 1.62 | 0.97 | 1.32 | 0.79 | 1.01 | 0.61 | 0.82 | 0.50 | 44.38  | 9.09  |
| Q8CGB3-  | Isoform 2 of Uveal autoantigen with coiled-coil domains and ankyrin repeats OS=Mus musculus GN=Uaca - [UACA_MOUSE] | 2.96  | 3 | 3 | 3  | 4    | 1.06 | 0.92 | 0.83 | 0.98  | 0.96 | 1.11 | 1.00 | 1.32 | 1.19 | 1.22 | 1.17 | 1.12 | 1.06 | 116.45 | 7.43  |
| Q7TNV0   | Protein DEK OS=Mus musculus GN=Dek PE=1 SV=1 - [DEK_MOUSE]                                                         | 21.05 | 3 | 8 | 8  | 17   | 1.07 | 0.91 | 0.89 | 1.15  | 1.04 | 1.24 | 1.16 | 1.32 | 1.13 | 1.30 | 1.14 | 1.16 | 1.10 | 43.13  | 6.86  |
| Q9QXM1   | Isoform 3 of Junction-mediating and -regulatory protein OS=Mus musculus GN=Jmy - [JMY_MOUSE]                       | 1.45  | 2 | 1 | 1  | 2    | 1.10 | 1.14 | 1.03 | 1.08  | 0.98 | 1.26 | 1.14 | 1.32 | 1.19 | 1.24 | 1.13 | 1.19 | 1.08 | 108.64 | 6.13  |
| Q91W92   | Cdc42 effector protein 1 OS=Mus musculus GN=Cdc42ep1 PE=1 SV=1 - [BORGS5_MOUSE]                                    | 8.56  | 1 | 2 | 2  | 4    | 1.02 | 0.86 | 0.84 | 0.94  | 0.92 | 1.35 | 1.32 | 1.32 | 1.29 | 1.15 | 1.13 | 1.00 | 0.98 | 43.07  | 7.21  |
| Q91WT4   | Dnaj homolog subfamily C member 17 OS=Mus musculus GN=Dnajc17 PE=2 SV=2 - [DIC17_MOUSE]                            | 3.63  | 1 | 1 | 1  | 2    | 1.08 | 1.14 | 1.06 | 0.85  | 0.79 | 1.07 | 0.99 | 1.32 | 1.22 | 1.00 | 0.93 | 1.14 | 1.06 | 34.44  | 8.57  |
| Q8BFZ3   | Beta-actin-like protein 2 OS=Mus musculus GN=Actb2 PE=1 SV=1 - [ACTBL_MOUSE]                                       | 38.56 | 1 | 2 | 12 | 682  | 1.20 | 2.12 | 1.04 | 22.53 | 3.63 | 1.99 | 1.65 | 1.32 | 1.07 | 1.30 | 1.09 | 1.08 | 1.09 | 41.98  | 5.49  |
| Q9JMC3   | Dnaj homolog subfamily A member 4 OS=Mus musculus GN=Dnaj4 PE=2 SV=1 - [DNJA4_MOUSE]                               | 23.68 | 2 | 7 | 8  | 31   | 1.04 | 1.09 | 1.07 | 1.02  | 1.02 | 1.29 | 1.26 | 1.32 | 1.30 | 1.17 | 1.14 | 1.09 | 1.14 | 44.87  | 7.58  |

|          |                                                                                                                    |       |    |   |    |    |      |      |      |       |       |      |      |      |      |      |      |      |      |        |       |
|----------|--------------------------------------------------------------------------------------------------------------------|-------|----|---|----|----|------|------|------|-------|-------|------|------|------|------|------|------|------|------|--------|-------|
| Q61897   | Keratin, type I cuticular Ha3-II OS=Mus musculus GN=Krt33b PE=2 SV=2 - [KT33B_MOUSE]                               | 12.62 | 11 | 3 | 5  | 12 | 0.98 | 1.29 | 1.33 | 13.50 | 13.70 | 1.18 | 1.13 | 1.32 | 1.27 | 1.54 | 1.49 | 1.19 | 1.20 | 45.83  | 4.82  |
| Q3US17   | Zinc finger protein 48 OS=Mus musculus GN=Znf48 PE=2 SV=2 - [ZNF48_MOUSE]                                          | 5.75  | 1  | 2 | 2  | 3  | 1.08 | 1.27 | 1.17 | 1.15  | 1.06  | 1.32 | 1.21 | 1.32 | 1.21 | 1.49 | 1.38 | 1.35 | 1.25 | 64.56  | 9.41  |
| F2Z3Y4   | Nitrogen permease regulator 3-like protein OS=Mus musculus GN=Npri3 PE=2 SV=1 - [F2Z3Y4_MOUSE]                     | 23.38 | 3  | 1 | 1  | 1  | 0.96 | 1.66 | 1.73 | 0.89  | 0.92  | 0.83 | 0.86 | 1.32 | 1.37 | 1.31 | 1.37 | 1.15 | 1.20 | 8.56   | 9.98  |
| Q9DBF7-  | Isoform 3 of Pre-mRNA-splicing factor CWC25 homolog OS=Mus musculus GN=Cwc25 - [CWC25_MOUSE]                       | 3.08  | 2  | 1 | 1  | 2  | 0.90 | 1.08 | 1.19 | 0.98  | 1.09  | 1.08 | 1.19 | 1.32 | 1.46 | 1.10 | 1.22 | 0.97 | 1.08 | 37.66  | 10.21 |
| Q8VC31   | Coiled-coil domain-containing protein 9 OS=Mus musculus GN=Ccdc9 PE=2 SV=1 - [CCDC9_MOUSE]                         | 14.73 | 5  | 7 | 8  | 22 | 1.05 | 1.06 | 0.98 | 1.08  | 1.01  | 1.24 | 1.19 | 1.32 | 1.21 | 1.27 | 1.14 | 1.14 | 1.07 | 61.41  | 5.00  |
| Q6PHS9-4 | Isoform 4 of Voltage-dependent calcium channel subunit alpha-2/delta-2 OS=Mus musculus GN=Cacna2d2 - [CA2D2_MOUSE] | 12.64 | 4  | 1 | 13 | 28 | 1.30 | 1.56 | 1.20 | 1.05  | 0.80  | 1.32 | 1.01 | 1.32 | 1.01 | 1.41 | 1.08 | 1.34 | 1.03 | 129.57 | 5.60  |
| F57784   | U2 small nuclear ribonucleoprotein A' OS=Mus musculus GN=Snrpa1 PE=1 SV=2 - [RU2A_MOUSE]                           | 17.25 | 2  | 4 | 4  | 6  | 0.96 | 0.94 | 0.94 | 0.99  | 1.03  | 1.29 | 1.31 | 1.32 | 1.29 | 1.23 | 1.26 | 1.13 | 1.12 | 28.34  | 8.62  |
| Q76KF0-3 | Isoform 2 of Semaphorin-6D OS=Mus musculus GN=Sema6d - [SEM6D_MOUSE]                                               | 1.70  | 7  | 1 | 1  | 1  | 1.13 | 1.08 | 0.95 | 1.04  | 0.92  | 1.00 | 0.88 | 1.32 | 1.16 | 1.04 | 0.92 | 1.06 | 0.94 | 111.70 | 8.66  |
| Q3TFP0   | Serine/arginine-rich splicing factor 10 OS=Mus musculus GN=Srsf10 PE=2 SV=1 - [Q3TFP0_MOUSE]                       | 33.52 | 4  | 3 | 5  | 37 | 0.99 | 1.09 | 1.07 | 0.94  | 0.94  | 1.21 | 1.16 | 1.32 | 1.31 | 1.14 | 1.12 | 1.14 | 1.17 | 22.12  | 10.33 |
| A6X8Z5   | Rho GTPase-activating protein 31 OS=Mus musculus GN=Arhgap31 PE=1 SV=1 - [RHG31_MOUSE]                             | 1.96  | 4  | 1 | 2  | 3  | 1.14 | 1.71 | 1.50 | 1.08  | 0.95  | 1.05 | 0.92 | 1.32 | 1.16 | 1.34 | 1.18 | 1.19 | 1.04 | 155.18 | 5.77  |
| Q6A044-2 | Isoform 2 of Protein FAM189A1 OS=Mus musculus GN=Fam189a1 - [F1891_MOUSE]                                          | 10.07 | 2  | 1 | 1  | 1  | 1.27 | 0.41 | 0.32 | 0.78  | 0.62  | 1.33 | 1.04 | 1.32 | 1.03 | 0.89 | 0.70 | 0.84 | 0.66 | 14.73  | 6.25  |

|          |                                                                                                           |       |   |    |    |     |      |      |      |      |      |      |      |      |      |      |      |      |      |        |       |
|----------|-----------------------------------------------------------------------------------------------------------|-------|---|----|----|-----|------|------|------|------|------|------|------|------|------|------|------|------|------|--------|-------|
| Q9CWS0   | N(G),N(G)-dimethylarginine dimethylaminohydrolase 1 OS=Mus musculus GN=Ddah1 PE=1 SV=3 - [DDAH1_MOUSE]    | 60.35 | 2 | 16 | 17 | 161 | 0.94 | 0.82 | 0.87 | 0.80 | 0.88 | 1.25 | 1.32 | 1.32 | 1.40 | 1.15 | 1.15 | 1.04 | 1.13 | 31.36  | 5.97  |
| Q8BG81   | Polymerase delta-interacting protein 3 OS=Mus musculus GN=Poldip3 PE=2 SV=1 - [PDIP3_MOUSE]               | 28.81 | 3 | 9  | 9  | 24  | 1.09 | 0.98 | 0.89 | 0.99 | 0.89 | 1.17 | 1.08 | 1.32 | 1.22 | 1.14 | 1.04 | 1.15 | 1.09 | 46.10  | 10.05 |
| Q8OU23-2 | Isoform 2 of Syntaphilin OS=Mus musculus GN=Saph - [SNPH_MOUSE]                                           | 36.36 | 3 | 13 | 14 | 56  | 1.02 | 1.02 | 0.99 | 1.03 | 1.01 | 1.23 | 1.21 | 1.32 | 1.31 | 1.19 | 1.09 | 1.11 | 1.05 | 57.04  | 6.02  |
| Q810V0   | U3 small nucleolar ribonucleoprotein protein MPP10 OS=Mus musculus GN=Mphosph10 PE=1 SV=2 - [MPP10_MOUSE] | 3.38  | 1 | 2  | 2  | 4   | 0.92 | 1.55 | 1.68 | 1.16 | 1.26 | 1.40 | 1.51 | 1.32 | 1.47 | 1.28 | 1.39 | 0.85 | 1.10 | 78.69  | 4.87  |
| Q61103   | Zinc finger protein ubi-d4 OS=Mus musculus GN=Dpf2 PE=1 SV=1 - [REQU_MOUSE]                               | 23.53 | 3 | 6  | 6  | 14  | 1.07 | 1.26 | 1.15 | 1.15 | 1.04 | 1.11 | 1.19 | 1.32 | 1.24 | 1.28 | 1.28 | 1.19 | 1.16 | 44.20  | 6.47  |
| Q3TPR7-2 | Isoform 2 of Transmembrane protein 184C OS=Mus musculus GN=Tmem184c - [T184C_MOUSE]                       | 1.93  | 1 | 1  | 1  | 2   | 1.13 | 1.27 | 1.11 | 1.08 | 0.95 | 1.05 | 0.92 | 1.32 | 1.16 | 1.27 | 1.12 | 1.11 | 0.98 | 71.07  | 5.08  |
| Q3U7U3   | F-box only protein 7 OS=Mus musculus GN=Fbxo7 PE=2 SV=2 - [FBX7_MOUSE]                                    | 7.46  | 5 | 2  | 2  | 3   | 1.79 | 1.35 | 0.75 | 1.00 | 0.56 | 1.42 | 0.79 | 1.33 | 0.74 | 1.22 | 0.69 | 1.90 | 1.06 | 57.61  | 5.83  |
| Q9CSN1   | SNW domain-containing protein 1 OS=Mus musculus GN=Snw1 PE=1 SV=3 - [SNW1_MOUSE]                          | 37.69 | 1 | 14 | 14 | 62  | 1.06 | 0.88 | 0.86 | 0.99 | 0.95 | 1.33 | 1.20 | 1.33 | 1.21 | 1.18 | 1.08 | 1.08 | 1.00 | 61.44  | 9.48  |
| Q8K0H5   | Transcription initiation factor TFIID subunit 10 OS=Mus musculus GN=Taf10 PE=1 SV=1 - [TAF10_MOUSE]       | 11.47 | 1 | 1  | 1  | 5   | 1.00 | 1.03 | 1.07 | 1.06 | 1.01 | 1.38 | 1.29 | 1.33 | 1.19 | 1.22 | 1.24 | 1.18 | 1.14 | 21.83  | 6.55  |
| D3Z6I8   | Tropomyosin alpha-3 chain OS=Mus musculus GN=Tpm3 PE=2 SV=1 - [D3Z6I8_MOUSE]                              | 54.66 | 3 | 2  | 22 | 416 | 1.11 | 0.99 | 0.81 | 0.97 | 0.89 | 1.22 | 1.09 | 1.33 | 1.11 | 1.16 | 1.03 | 1.06 | 0.96 | 28.71  | 4.79  |
| Q8BGZ4-  | Isoform 2 of Cell division cycle protein 23 homolog OS=Mus musculus GN=Cdc23 - [CDC23_MOUSE]              | 3.55  | 3 | 1  | 1  | 1   | 1.04 | 0.65 | 0.63 | 0.86 | 0.83 | 1.38 | 1.32 | 1.33 | 1.28 | 1.24 | 1.20 | 1.04 | 1.00 | 55.77  | 7.75  |
| F7D143   | Uncharacterized protein KIAA0232 (Fragment) OS=Mus musculus GN=D5Erd579e PE=2 SV=1 - [F7D143_MOUSE]       | 1.49  | 3 | 1  | 1  | 2   | 1.38 | 1.27 | 0.92 | 1.12 | 0.82 | 1.44 | 1.04 | 1.33 | 0.96 | 1.27 | 0.92 | 1.39 | 1.01 | 140.95 | 4.89  |

|          |                                                                                                   |       |    |    |    |     |      |      |      |      |      |      |      |      |      |      |      |      |      |        |      |
|----------|---------------------------------------------------------------------------------------------------|-------|----|----|----|-----|------|------|------|------|------|------|------|------|------|------|------|------|------|--------|------|
| P21619   | Lamin-B2 OS=Musculus GN=Lmb2 PE=1 SV=2 - [LMNB2_MOUSE]                                            | 59.73 | 2  | 27 | 31 | 176 | 1.01 | 0.98 | 0.99 | 0.91 | 0.94 | 1.25 | 1.22 | 1.33 | 1.32 | 1.17 | 1.15 | 1.14 | 1.16 | 67.28  | 5.50 |
| B1AZP2-2 | Isoform 2 of Disks large-associated protein 4 OS=Mus musculus GN=Dlgap4 - [DLGP4_MOUSE]           | 31.14 | 10 | 13 | 23 | 77  | 0.99 | 1.05 | 0.93 | 1.08 | 1.02 | 1.26 | 1.22 | 1.33 | 1.22 | 1.13 | 1.08 | 1.12 | 1.06 | 107.49 | 7.30 |
| Q3V1F8   | Epoxide hydrolase 3 OS=Mus musculus GN=Ephx3 PE=2 SV=2 - [EPHX3_MOUSE]                            | 1.91  | 2  | 1  | 1  | 1   | 0.91 | 1.16 | 1.28 | 0.86 | 0.95 | 1.34 | 1.48 | 1.33 | 1.46 | 1.20 | 1.33 | 0.80 | 0.89 | 41.83  | 7.75 |
| D3YV00   | Probable phospholipid-transporting ATPase IIB OS=Mus musculus GN=At9b PE=4 SV=1 - [D3YV00_MOUSE]  | 6.78  | 3  | 3  | 4  | 5   | 1.21 | 1.13 | 0.93 | 1.22 | 1.00 | 1.26 | 0.99 | 1.33 | 0.82 | 1.10 | 0.91 | 1.13 | 0.93 | 127.86 | 7.64 |
| P05627   | Transcription factor AP-1 OS=Mus musculus GN=Jun PE=1 SV=3 - [JUN_MOUSE]                          | 6.59  | 1  | 1  | 2  | 4   | 1.29 | 1.23 | 0.95 | 1.08 | 0.84 | 1.32 | 1.02 | 1.33 | 1.03 | 1.49 | 1.16 | 1.34 | 1.04 | 35.92  | 8.75 |
| D3YXZ3   | Kinesin light chain 2 OS=Mus musculus GN=Klc2 PE=4 SV=1 - [D3YXZ3_MOUSE]                          | 46.84 | 4  | 16 | 22 | 62  | 0.99 | 1.03 | 1.07 | 0.98 | 1.03 | 1.26 | 1.27 | 1.33 | 1.27 | 1.23 | 1.23 | 1.22 | 1.20 | 68.13  | 7.06 |
| A3KGV1-  | Isoform 7 of Outer dense fiber protein 2 OS=Mus musculus GN=Od2 - [ODFP2_MOUSE]                   | 4.10  | 9  | 2  | 2  | 4   | 0.94 | 1.08 | 1.14 | 0.99 | 1.05 | 1.10 | 1.16 | 1.33 | 1.40 | 1.19 | 1.26 | 1.08 | 1.15 | 70.72  | 6.67 |
| Q8VEJ9   | Vacuolar protein sorting-associated protein 4A OS=Mus musculus GN=Vps4a PE=1 SV=1 - [VPS4A_MOUSE] | 10.53 | 1  | 3  | 4  | 7   | 1.05 | 0.98 | 0.94 | 1.03 | 0.98 | 1.32 | 1.19 | 1.33 | 1.33 | 1.19 | 1.19 | 1.24 | 1.09 | 48.88  | 7.80 |
| P57776-3 | Isoform 3 of Elongation factor 1-delta OS=Mus musculus GN=Eef1d - [EF1D_MOUSE]                    | 42.58 | 10 | 2  | 23 | 122 | 0.96 | 1.12 | 1.21 | 0.96 | 1.00 | 1.26 | 1.24 | 1.33 | 1.28 | 1.24 | 1.35 | 1.27 | 1.32 | 72.89  | 6.43 |
| Q9D0T1   | NHP2-like protein 1 OS=Mus musculus GN=Nhp211 PE=2 SV=4 - [NH2L1_MOUSE]                           | 27.34 | 2  | 3  | 3  | 6   | 1.00 | 1.00 | 1.04 | 1.03 | 1.02 | 1.35 | 1.30 | 1.33 | 1.36 | 1.24 | 1.30 | 1.24 | 1.29 | 14.16  | 8.46 |
| Q9CQE9   | FLYWCH family member 2 OS=Mus musculus GN=Flywch2 PE=2 SV=1 - [FWCH2_MOUSE]                       | 22.30 | 3  | 2  | 2  | 4   | 1.22 | 1.28 | 1.04 | 0.94 | 0.77 | 1.56 | 1.27 | 1.33 | 1.08 | 1.23 | 1.00 | 1.25 | 1.03 | 14.45  | 8.13 |
| Q9QXS6   | Drebrin OS=Mus musculus GN=Dbn1 PE=1 SV=4 - [DREB_MOUSE]                                          | 50.57 | 4  | 29 | 29 | 357 | 1.01 | 0.92 | 0.92 | 0.96 | 0.95 | 1.30 | 1.31 | 1.33 | 1.33 | 1.19 | 1.18 | 1.12 | 1.11 | 77.24  | 4.49 |
| Q8BVF2   | Phosducin-like protein 3 OS=Mus musculus GN=Pdc3 PE=1 SV=1 - [PDCL3_MOUSE]                        | 4.17  | 1  | 1  | 1  | 5   | 1.07 | 0.83 | 0.80 | 0.93 | 0.87 | 1.21 | 1.17 | 1.33 | 1.16 | 1.21 | 1.16 | 1.15 | 1.08 | 27.56  | 4.72 |

|        |                                                                                                    |       |   |    |    |     |      |      |      |      |      |      |      |      |      |      |      |      |      |        |      |
|--------|----------------------------------------------------------------------------------------------------|-------|---|----|----|-----|------|------|------|------|------|------|------|------|------|------|------|------|------|--------|------|
| P30681 | High mobility group protein B2 OS=Mus musculus GN=Hmgb2 PE=1 SV=3 - [HMGB2_MOUSE]                  | 28.57 | 1 | 5  | 6  | 69  | 0.98 | 0.84 | 0.87 | 1.13 | 1.15 | 1.30 | 1.30 | 1.33 | 1.31 | 1.26 | 1.31 | 1.08 | 1.12 | 24.15  | 7.31 |
| E9PVZ8 | Protein Golgb1 OS=Mus musculus GN=Golgb1 PE=2 SV=1 - [E9PVZ8_MOUSE]                                | 26.07 | 4 | 66 | 67 | 144 | 1.04 | 0.95 | 0.90 | 1.01 | 0.98 | 1.28 | 1.23 | 1.33 | 1.25 | 1.23 | 1.18 | 1.09 | 1.05 | 369.93 | 5.05 |
| A2AP88 | Zinc finger CCHC domain-containing protein 6 OS=Mus musculus GN=Zc3h6 PE=4 SV=1 - [A2AP88_MOUSE]   | 3.91  | 2 | 3  | 3  | 5   | 1.19 | 1.12 | 0.94 | 1.09 | 0.95 | 1.38 | 1.16 | 1.33 | 1.20 | 1.26 | 1.17 | 1.36 | 1.15 | 131.18 | 6.99 |
| Q922M7 | Ashwin OS=Mus musculus PE=1 SV=1 - [ASHWN_MOUSE]                                                   | 38.79 | 1 | 7  | 7  | 13  | 1.09 | 0.92 | 1.02 | 0.99 | 0.90 | 1.21 | 1.07 | 1.33 | 1.20 | 1.18 | 1.08 | 1.03 | 0.97 | 26.01  | 9.55 |
| Q62241 | U1 small nuclear ribonucleoprotein C OS=Mus musculus GN=Snrpe PE=2 SV=1 - [RU1C_MOUSE]             | 18.87 | 1 | 2  | 2  | 6   | 1.11 | 0.75 | 0.69 | 1.06 | 0.96 | 1.36 | 1.18 | 1.33 | 1.19 | 1.13 | 1.13 | 1.04 | 1.00 | 17.35  | 9.67 |
| Q9CZA6 | Isoform 2 of Nuclear distribution protein nudE homolog 1 OS=Mus musculus GN=Nde1 - [NDE1_MOUSE]    | 47.63 | 6 | 8  | 13 | 30  | 1.01 | 1.01 | 0.88 | 0.92 | 0.89 | 1.28 | 1.26 | 1.33 | 1.32 | 1.19 | 1.16 | 1.21 | 1.17 | 35.87  | 5.19 |
| Q64327 | Male-enhanced antigen 1 OS=Mus musculus GN=Mea1 PE=2 SV=1 - [MEA1_MOUSE]                           | 17.24 | 1 | 2  | 2  | 10  | 1.04 | 1.15 | 1.06 | 0.98 | 0.97 | 1.23 | 1.13 | 1.33 | 1.26 | 1.26 | 1.21 | 1.22 | 1.17 | 18.57  | 4.08 |
| Q9WUR9 | GTP:AMP phosphotransferase AK4, mitochondrial OS=Mus musculus GN=Ak4 PE=2 SV=1 - [KAD4_MOUSE]      | 30.49 | 3 | 4  | 4  | 10  | 1.01 | 1.31 | 1.21 | 1.19 | 1.20 | 1.35 | 1.35 | 1.33 | 1.26 | 1.46 | 1.53 | 1.27 | 1.26 | 25.05  | 7.53 |
| Q8VD24 | Zinc finger CCHC domain-containing protein 18 OS=Mus musculus GN=Zcchc18 PE=2 SV=1 - [ZCC18_MOUSE] | 2.80  | 1 | 1  | 1  | 3   | 1.74 | 1.45 | 0.83 | 1.60 | 0.91 | 1.38 | 0.79 | 1.33 | 0.76 | 1.19 | 0.68 | 1.68 | 0.96 | 43.95  | 5.38 |
| O70480 | Vesicle-associated membrane protein 4 OS=Mus musculus GN=Vamp4 PE=1 SV=1 - [VAMP4_MOUSE]           | 35.46 | 2 | 4  | 4  | 32  | 1.10 | 1.25 | 1.13 | 1.11 | 0.89 | 1.17 | 1.09 | 1.33 | 1.20 | 1.20 | 1.09 | 1.15 | 1.02 | 16.34  | 7.36 |
| Q8K4J6 | MKL/myocardin-like protein 1 OS=Mus musculus GN=Mkl1 PE=1 SV=2 - [MKL1_MOUSE]                      | 10.27 | 8 | 6  | 8  | 17  | 1.00 | 0.88 | 0.84 | 0.98 | 0.93 | 1.32 | 1.20 | 1.33 | 1.23 | 1.22 | 1.17 | 1.16 | 1.11 | 102.48 | 5.50 |



|          |                                                                                                  |       |    |    |    |     |      |      |      |      |      |      |      |      |      |      |      |      |      |        |      |
|----------|--------------------------------------------------------------------------------------------------|-------|----|----|----|-----|------|------|------|------|------|------|------|------|------|------|------|------|------|--------|------|
| Q3ULJ3   | MCG3697, isoform CRA_c OS=Mus musculus GN=Upf3a PE=2 SV=1 - [Q3ULJ3_MOUSE]                       | 3.55  | 1  | 1  | 1  | 2   | 1.00 | 1.25 | 1.25 | 1.09 | 1.10 | 1.26 | 1.26 | 1.34 | 1.34 | 1.36 | 1.37 | 1.42 | 1.43 | 48.72  | 9.35 |
| Q9R0Y5   | Adenylate kinase isoenzyme 1 OS=Mus musculus GN=Ak1 PE=1 SV=1 - [KAD1_MOUSE]                     | 78.87 | 2  | 17 | 17 | 259 | 0.95 | 0.91 | 0.98 | 0.88 | 0.93 | 1.25 | 1.33 | 1.34 | 1.39 | 1.15 | 1.21 | 1.14 | 1.19 | 21.53  | 5.81 |
| Q925F2   | Endothelial cell-selective adhesion molecule OS=Mus musculus GN=Esam PE=1 SV=1 - [ESAM_MOUSE]    | 6.09  | 1  | 1  | 1  | 7   | 0.84 | 0.98 | 1.14 | 0.93 | 1.12 | 1.18 | 1.38 | 1.34 | 1.37 | 1.08 | 1.31 | 0.90 | 1.04 | 41.78  | 9.26 |
| Q8C5L3-3 | Isoform 3 of CCR4-NOT transcription complex subunit 2 OS=Mus musculus GN=Cnot2 - [CNOT2_MOUSE]   | 3.30  | 5  | 1  | 1  | 1   | 0.61 | 0.93 | 1.52 | 0.95 | 1.55 | 1.12 | 1.82 | 1.34 | 2.18 | 1.34 | 2.20 | 0.99 | 1.62 | 50.19  | 7.93 |
| E9PV16   | Adenylylhomocysteine OS=Mus musculus GN=Ahcyl2 PE=2 SV=1 - [E9PV16_MOUSE]                        | 29.39 | 8  | 1  | 20 | 81  | 1.20 | 1.23 | 1.03 | 1.05 | 0.87 | 1.32 | 1.10 | 1.34 | 1.11 | 1.32 | 1.10 | 1.17 | 0.98 | 69.93  | 6.79 |
| Q00420-3 | Isoform 3 of GABA-binding protein subunit beta-1 OS=Mus musculus GN=Gabpb1 [GABP1_MOUSE]         | 2.09  | 2  | 1  | 1  | 1   | 0.93 | 1.24 | 1.32 | 1.02 | 1.09 | 1.18 | 1.26 | 1.34 | 1.43 | 1.19 | 1.28 | 1.00 | 1.07 | 41.23  | 4.84 |
| Q9CW07   | Protein phosphatase 1 regulatory subunit 3G OS=Mus musculus GN=Ppp1r3g PE=2 SV=2 - [PP13G_MOUSE] | 4.03  | 1  | 1  | 1  | 2   | 0.86 | 1.02 | 1.18 | 1.04 | 1.21 | 1.33 | 1.54 | 1.34 | 1.55 | 1.13 | 1.32 | 1.03 | 1.20 | 37.80  | 5.00 |
| Q9D4H9-  | Isoform 3 of PHD finger protein 14 OS=Mus musculus GN=Phf14 - [PHF14_MOUSE]                      | 5.13  | 4  | 3  | 3  | 3   | 1.06 | 1.02 | 0.97 | 1.04 | 0.98 | 1.33 | 1.25 | 1.34 | 1.19 | 1.30 | 1.23 | 1.22 | 1.16 | 98.71  | 5.34 |
| G5E898   | Periplakin OS=Mus musculus GN=Ppl PE=4 SV=1 - [G5E898_MOUSE]                                     | 0.80  | 2  | 1  | 2  | 3   | 0.96 | 1.14 | 1.18 | 0.93 | 0.97 | 1.18 | 1.21 | 1.34 | 1.38 | 1.29 | 1.34 | 1.19 | 1.23 | 203.66 | 5.48 |
| Q9QX66-  | Isoform 3 of Zinc finger protein neuro-d4 OS=Mus musculus GN=Dpf1 - [DPF1_MOUSE]                 | 23.49 | 11 | 5  | 5  | 11  | 1.04 | 1.03 | 0.96 | 1.10 | 1.08 | 1.29 | 1.32 | 1.34 | 1.28 | 1.27 | 1.19 | 1.29 | 1.20 | 37.93  | 7.23 |
| Q6P6J9   | Thioredoxin domain-containing protein 15 OS=Mus musculus GN=Txndc15 PE=1 SV=1 - [TXD15_MOUSE]    | 10.76 | 1  | 2  | 2  | 4   | 1.02 | 1.05 | 1.03 | 1.03 | 1.01 | 1.07 | 1.04 | 1.34 | 1.30 | 1.27 | 1.24 | 1.07 | 1.05 | 38.12  | 4.77 |
| H3BLE1   | Metastasis-associated protein MTA3 (Fragment) OS=Mus musculus GN=Mta3 PE=2 SV=1 - [H3BLE1_MOUSE] | 8.86  | 6  | 2  | 2  | 3   | 1.45 | 1.32 | 1.23 | 1.04 | 0.97 | 0.97 | 0.90 | 1.34 | 0.92 | 1.34 | 0.93 | 1.38 | 0.96 | 30.44  | 7.30 |

|        |                                                                                                                              |       |   |    |    |    |      |      |      |      |      |      |      |      |      |      |      |      |      |        |       |
|--------|------------------------------------------------------------------------------------------------------------------------------|-------|---|----|----|----|------|------|------|------|------|------|------|------|------|------|------|------|------|--------|-------|
| Q8C170 | Leucine-rich repeat-containing protein 20<br>OS=Mus musculus<br>GN=Lrrc20 PE=2<br>SV=1 -<br>[LRC20_MOUSE]                    | 5.98  | 1 | 1  | 1  | 2  | 1.01 | 1.44 | 1.42 | 1.15 | 1.14 | 1.34 | 1.32 | 1.34 | 1.31 | 1.26 | 1.25 | 1.18 | 1.17 | 20.80  | 5.66  |
| Q99LX0 | Protein DJ-1 OS=Mus musculus<br>GN=Park7 PE=1<br>SV=1 -<br>[PARK7_MOUSE]                                                     | 65.08 | 5 | 10 | 10 | 55 | 0.94 | 0.87 | 0.91 | 0.86 | 0.96 | 1.29 | 1.24 | 1.34 | 1.33 | 1.18 | 1.24 | 1.07 | 1.15 | 20.01  | 6.77  |
| Q99N93 | 39S ribosomal protein L16, mitochondrial<br>OS=Mus musculus<br>GN=Mrpl16 PE=2<br>SV=1 -<br>[RM16_MOUSE]                      | 6.37  | 1 | 1  | 1  | 1  | 1.27 | 1.66 | 1.31 | 1.07 | 0.84 | 1.12 | 0.88 | 1.34 | 1.05 | 1.17 | 0.92 | 1.34 | 1.06 | 28.79  | 10.27 |
| E0CZ90 | Proteasome activator complex subunit 2 (Fragment)<br>OS=Mus musculus<br>GN=Psmc2 PE=2<br>SV=1 -<br>[E0CZ90_MOUSE]            | 13.94 | 3 | 2  | 2  | 2  | 1.74 | 1.16 | 0.66 | 1.76 | 1.01 | 1.12 | 0.64 | 1.34 | 0.76 | 1.33 | 0.77 | 1.57 | 0.90 | 18.67  | 4.88  |
| Q62414 | Neurogenic differentiation factor 2<br>OS=Mus musculus<br>GN=Neurod2 PE=1<br>SV=3 -<br>[NDF2_MOUSE]                          | 3.39  | 1 | 1  | 1  | 2  | 1.01 | 1.75 | 1.73 | 1.03 | 1.02 | 1.36 | 1.34 | 1.34 | 1.32 | 1.11 | 1.10 | 1.22 | 1.21 | 41.47  | 6.76  |
| D3Z6H3 | Dynactin 6, isoform CRA_b<br>OS=Mus musculus<br>GN=Dctn6 PE=4<br>SV=1 -<br>[D3Z6H3_MOUSE]                                    | 27.57 | 5 | 4  | 4  | 16 | 0.93 | 0.78 | 0.93 | 0.88 | 0.99 | 1.30 | 1.40 | 1.34 | 1.48 | 1.17 | 1.32 | 1.11 | 1.17 | 20.03  | 6.38  |
| O88811 | Signal transducing adapter molecule 2<br>OS=Mus musculus<br>GN=Stam2 PE=1<br>SV=1 -<br>[STAM2_MOUSE]                         | 21.22 | 3 | 7  | 9  | 24 | 0.98 | 0.90 | 0.92 | 0.93 | 1.01 | 1.33 | 1.26 | 1.34 | 1.39 | 1.24 | 1.21 | 1.17 | 1.05 | 57.42  | 5.07  |
| Q6P5H2 | Nestin OS=Mus musculus<br>GN=Nes PE=1<br>SV=1 -<br>[NEST_MOUSE]                                                              | 13.14 | 2 | 13 | 13 | 29 | 0.99 | 0.98 | 1.08 | 0.91 | 0.89 | 1.26 | 1.29 | 1.34 | 1.40 | 1.20 | 1.28 | 1.03 | 1.16 | 207.00 | 4.34  |
| Q9JIK9 | 28S ribosomal protein S34, mitochondrial<br>OS=Mus musculus<br>GN=Mrps34 PE=2<br>SV=1 -<br>[RT34_MOUSE]                      | 36.70 | 1 | 6  | 6  | 15 | 1.01 | 1.07 | 1.14 | 1.02 | 1.02 | 1.31 | 1.09 | 1.34 | 1.16 | 1.25 | 1.22 | 1.16 | 1.12 | 25.81  | 10.43 |
| Q9Z1P6 | NADH dehydrogenase [ubiquinone] 1 alpha subcomplex subunit 7<br>OS=Mus musculus<br>GN=Ndufa7 PE=1<br>SV=3 -<br>[NDUA7_MOUSE] | 60.18 | 1 | 8  | 8  | 50 | 1.00 | 0.82 | 0.82 | 0.92 | 0.92 | 1.32 | 1.30 | 1.34 | 1.30 | 1.16 | 1.18 | 1.15 | 1.18 | 12.57  | 10.17 |
| E9PYF7 | APIAR OS=Mus musculus<br>GN=Ap1ar PE=4<br>SV=1 -<br>[E9PYF7_MOUSE]                                                           | 11.41 | 1 | 2  | 2  | 4  | 0.81 | 1.04 | 1.37 | 0.78 | 0.83 | 1.20 | 1.48 | 1.34 | 1.23 | 0.98 | 1.21 | 0.84 | 1.23 | 33.76  | 4.87  |

|          |                                                                                                              |       |   |   |    |     |      |      |      |      |      |      |      |      |      |      |      |      |      |        |       |
|----------|--------------------------------------------------------------------------------------------------------------|-------|---|---|----|-----|------|------|------|------|------|------|------|------|------|------|------|------|------|--------|-------|
| Q8BU85   | Methionine-R-sulfoxide reductase B3, mitochondrial OS=Mus musculus GN=MsrB3 PE=1 SV=2 - [MSRB3_MOUSE]        | 4.74  | 1 | 1 | 1  | 2   | 0.94 | 0.77 | 0.82 | 0.88 | 0.94 | 1.23 | 1.31 | 1.34 | 1.43 | 1.04 | 1.12 | 0.97 | 1.04 | 26.82  | 7.99  |
| Q7TPS5-2 | Isoform 2 of C2 domain-containing protein 5 OS=Mus musculus GN=C2cd5 - [C2CD5_MOUSE]                         | 2.63  | 4 | 2 | 2  | 3   | 0.94 | 1.59 | 1.68 | 1.09 | 1.16 | 1.11 | 1.17 | 1.34 | 1.42 | 1.16 | 1.23 | 1.72 | 1.83 | 108.80 | 6.05  |
| P04370   | Myelin basic protein OS=Mus musculus GN=Mbp PE=1 SV=2 - [MBP_MOUSE]                                          | 60.40 | 3 | 2 | 18 | 975 | 1.03 | 1.23 | 1.19 | 1.27 | 1.23 | 1.43 | 1.37 | 1.34 | 1.29 | 1.54 | 1.50 | 1.22 | 1.18 | 27.15  | 9.58  |
| Q8K124   | Pleckstrin homology domain-containing family O member 2 OS=Mus musculus GN=Plekho2 PE=1 SV=1 - [PKHO2_MOUSE] | 23.03 | 1 | 6 | 6  | 11  | 0.96 | 1.01 | 1.13 | 0.82 | 0.87 | 1.19 | 1.28 | 1.34 | 1.40 | 1.08 | 1.17 | 0.94 | 0.98 | 53.84  | 5.50  |
| O08583   | THO complex subunit 4 OS=Mus musculus GN=Alyref PE=1 SV=3 - [THOC4_MOUSE]                                    | 39.22 | 3 | 5 | 7  | 55  | 1.10 | 1.03 | 0.96 | 1.03 | 1.03 | 1.21 | 1.22 | 1.34 | 1.31 | 1.31 | 1.20 | 1.13 | 1.12 | 26.92  | 11.15 |
| Q9QZ59-2 | Isoform 2 of Doublesex and mab-3-related transcription factor 1 OS=Mus musculus GN=Dmrt1 - [DMRT1_MOUSE]     | 15.57 | 3 | 1 | 1  | 2   | 1.04 | 1.03 | 0.99 | 0.60 | 0.58 | 1.36 | 1.30 | 1.34 | 1.29 | 1.15 | 1.11 | 1.61 | 1.56 | 21.88  | 8.90  |
| Q8BHG9   | CGG triplet repeat-binding protein 1 OS=Mus musculus GN=Cggbp1 PE=2 SV=1 - [CGBP1_MOUSE]                     | 25.75 | 1 | 3 | 3  | 6   | 1.06 | 0.84 | 0.80 | 1.17 | 1.11 | 1.21 | 1.07 | 1.34 | 1.24 | 1.21 | 1.16 | 1.11 | 1.07 | 18.75  | 8.95  |
| Q8VE88-2 | Isoform 2 of Protein FAM114A2 OS=Mus musculus GN=Fam114a2 - [F1142_MOUSE]                                    | 25.31 | 2 | 7 | 7  | 10  | 0.94 | 0.78 | 0.85 | 0.97 | 0.99 | 1.32 | 1.40 | 1.34 | 1.36 | 1.28 | 1.36 | 1.09 | 1.09 | 53.34  | 4.89  |
| Q8K3X4   | Interferon regulatory factor 2-binding protein like OS=Mus musculus GN=Irf2bp1 PE=1 SV=1 - [I2BPL_MOUSE]     | 20.65 | 1 | 8 | 10 | 23  | 0.93 | 0.94 | 1.00 | 0.93 | 0.97 | 1.28 | 1.32 | 1.34 | 1.35 | 1.22 | 1.29 | 1.15 | 1.23 | 80.51  | 8.24  |
| O09000   | Nuclear receptor coactivator 3 OS=Mus musculus GN=Ncoa3 PE=1 SV=2 - [NCOA3_MOUSE]                            | 1.00  | 3 | 1 | 1  | 1   | 0.97 | 0.94 | 0.97 | 1.07 | 1.10 | 1.08 | 1.11 | 1.34 | 1.38 | 1.26 | 1.30 | 0.94 | 0.97 | 151.48 | 7.77  |
| Q9CQY2   | RNMT-activating mini protein OS=Mus musculus GN=Fam103a1 PE=2 SV=1 - [RAM_MOUSE]                             | 21.01 | 3 | 2 | 2  | 22  | 0.98 | 1.13 | 1.18 | 0.95 | 0.99 | 1.14 | 1.20 | 1.34 | 1.39 | 1.22 | 1.23 | 1.15 | 1.16 | 14.55  | 8.40  |

|        |                                                                                                                                   |       |   |   |    |     |      |      |      |      |      |      |      |      |      |      |      |      |      |        |      |
|--------|-----------------------------------------------------------------------------------------------------------------------------------|-------|---|---|----|-----|------|------|------|------|------|------|------|------|------|------|------|------|------|--------|------|
| E9PV69 | CDK2-associated and cullin domain-containing protein 1<br>OS=Mus musculus<br>GN=Cacul1 PE=2<br>SV=1 -<br>[E9PV69_MOUSE]           | 7.49  | 3 | 2 | 2  | 4   | 0.91 | 1.04 | 1.13 | 1.03 | 1.13 | 1.14 | 1.24 | 1.34 | 1.46 | 1.22 | 1.34 | 1.36 | 1.49 | 38.81  | 5.25 |
| P28653 | Biglycan OS=Mus musculus<br>GN=Bgn PE=2 SV=1 -<br>[PGS1_MOUSE]                                                                    | 12.47 | 1 | 3 | 3  | 7   | 1.00 | 1.22 | 1.22 | 1.09 | 1.04 | 1.40 | 1.30 | 1.34 | 1.34 | 1.62 | 1.55 | 1.32 | 1.18 | 41.61  | 7.27 |
| Q3UD01 | Putative ataxin-7-like protein 3B OS=Mus musculus<br>GN=Atxn713b PE=3<br>SV=1 -<br>[A7L3B_MOUSE]                                  | 20.62 | 1 | 1 | 1  | 2   | 0.93 | 0.95 | 1.02 | 0.79 | 0.85 | 0.87 | 0.93 | 1.34 | 1.44 | 0.81 | 0.87 | 0.92 | 0.98 | 10.72  | 4.32 |
| E9Q784 | Protein Zc3h13 OS=Mus musculus<br>GN=Zc3h13 PE=2<br>SV=1 -<br>[E9Q784_MOUSE]                                                      | 4.80  | 1 | 6 | 6  | 14  | 1.03 | 1.13 | 0.95 | 0.97 | 0.93 | 1.31 | 1.12 | 1.34 | 1.15 | 1.27 | 1.15 | 1.25 | 1.17 | 203.64 | 9.38 |
| Q8R1B0 | SH3 and cysteine-rich domain-containing protein 2 OS=Mus musculus<br>GN=Stac2 PE=2 SV=1 -<br>[STAC2_MOUSE]                        | 12.01 | 3 | 4 | 4  | 11  | 0.94 | 0.97 | 0.99 | 1.03 | 1.07 | 1.28 | 1.32 | 1.34 | 1.36 | 1.04 | 1.10 | 0.85 | 0.88 | 44.76  | 7.75 |
| P59648 | FXD domain-containing ion transport regulator 7 OS=Mus musculus<br>GN=Fxtd7 PE=1<br>SV=1 -<br>[FXD7_MOUSE]                        | 20.00 | 1 | 1 | 1  | 1   | 1.12 | 0.94 | 0.83 | 0.91 | 0.81 | 1.15 | 1.02 | 1.35 | 1.20 | 1.14 | 1.02 | 1.19 | 1.06 | 8.48   | 7.84 |
| F7A26  | Protein Gm20459 (Fragment) OS=Mus musculus<br>GN=Gm20459 PE=4<br>SV=1 -<br>[F7A26_MOUSE]                                          | 33.51 | 6 | 1 | 29 | 133 | 1.15 | 1.13 | 0.98 | 0.96 | 0.83 | 1.23 | 1.07 | 1.35 | 1.17 | 1.23 | 1.07 | 1.22 | 1.06 | 126.01 | 5.27 |
| O54724 | Polymerase I and transcript release factor OS=Mus musculus<br>GN=Ptrf PE=1 SV=1 -<br>[PTRF_MOUSE]                                 | 28.32 | 1 | 8 | 8  | 83  | 0.95 | 0.91 | 0.97 | 0.86 | 0.91 | 1.17 | 1.23 | 1.35 | 1.55 | 1.07 | 1.18 | 0.88 | 0.97 | 43.93  | 5.52 |
| Q9CQV1 | Mitochondrial import inner membrane translocase subunit TIM16 OS=Mus musculus<br>GN=Pam16 PE=2 SV=1 -<br>[TIM16_MOUSE]            | 19.20 | 1 | 2 | 2  | 8   | 1.01 | 0.92 | 0.95 | 1.06 | 1.02 | 1.41 | 1.14 | 1.35 | 1.31 | 1.33 | 1.13 | 1.28 | 1.10 | 13.78  | 9.64 |
| D3Z3N9 | Neuronal tyrosine-phosphorylated phosphoinositide-3-kinase adapter 2 OS=Mus musculus<br>GN=Nyap2 PE=2<br>SV=1 -<br>[D3Z3N9_MOUSE] | 22.73 | 4 | 1 | 11 | 44  | 1.05 | 1.02 | 0.97 | 0.96 | 0.91 | 1.29 | 1.22 | 1.35 | 1.27 | 1.10 | 1.04 | 1.08 | 1.03 | 73.84  | 8.65 |
| Q7TPG7 | Protein FAM19A2 OS=Mus musculus<br>GN=Fam19a2 PE=2<br>SV=1 -<br>[F19A2_MOUSE]                                                     | 20.61 | 2 | 2 | 2  | 6   | 1.16 | 1.20 | 1.04 | 1.07 | 0.90 | 1.37 | 1.14 | 1.35 | 1.12 | 1.19 | 0.99 | 1.30 | 1.13 | 14.64  | 9.17 |
| Q9JLB2 | MAGUK p55 subfamily member 5 OS=Mus musculus<br>GN=Mpp5 PE=1<br>SV=1 -<br>[MPP5_MOUSE]                                            | 16.74 | 1 | 8 | 8  | 15  | 0.93 | 1.16 | 1.19 | 0.92 | 1.00 | 1.25 | 1.34 | 1.35 | 1.36 | 1.24 | 1.35 | 1.17 | 1.25 | 77.18  | 6.09 |

|          |                                                                                                               |       |   |    |    |    |      |      |      |      |      |      |      |      |      |      |      |      |      |        |        |      |
|----------|---------------------------------------------------------------------------------------------------------------|-------|---|----|----|----|------|------|------|------|------|------|------|------|------|------|------|------|------|--------|--------|------|
| Q3UZV7-  | Isoform 2 of UPP0577 protein KIAA1324-like homolog OS=Mus musculus - [K132L_MOUSE]                            | 3.06  | 7 | 2  | 2  | 2  | 2    | 1.07 | 1.11 | 1.03 | 1.32 | 1.23 | 1.17 | 1.09 | 1.35 | 1.26 | 1.23 | 1.15 | 1.08 | 1.01   | 111.96 | 6.16 |
| O35153   | BET1-like protein OS=Mus musculus GN=Bet11 PE=3 SV=1 - [BET1L_MOUSE]                                          | 25.23 | 1 | 2  | 2  | 4  | 1.04 | 1.18 | 1.13 | 1.08 | 1.04 | 1.26 | 1.21 | 1.35 | 1.30 | 1.12 | 1.08 | 1.17 | 1.13 | 12.42  | 8.82   |      |
| Q571K4   | TGF-beta-activated kinase 1 and MAP3K7-binding protein 3 OS=Mus musculus GN=Tab3 PE=1 SV=2 - [TAB3_MOUSE]     | 11.17 | 1 | 5  | 5  | 11 | 0.92 | 0.93 | 1.01 | 0.89 | 1.01 | 1.29 | 1.35 | 1.35 | 1.49 | 1.23 | 1.30 | 1.12 | 1.21 | 78.98  | 8.50   |      |
| O55074   | A-kinase anchor protein 7 isoform alpha OS=Mus musculus GN=Akap7 PE=1 SV=4 - [AKA7A_MOUSE]                    | 38.27 | 2 | 5  | 5  | 47 | 1.05 | 1.07 | 1.01 | 0.99 | 0.95 | 1.41 | 1.32 | 1.35 | 1.25 | 1.24 | 1.17 | 1.09 | 1.03 | 9.16   | 5.27   |      |
| Q8BMD5   | Isoform 6 of Cytidine and dCMP deaminase domain-containing protein 1 OS=Mus musculus GN=Cdad1 - [CDAC1_MOUSE] | 3.66  | 6 | 1  | 1  | 1  | 1.30 | 0.93 | 0.72 | 1.21 | 0.93 | 1.31 | 1.00 | 1.35 | 1.04 | 1.27 | 0.98 | 0.93 | 0.71 | 43.35  | 7.05   |      |
| Q9D067-4 | Isoform 4 of Nuclear protein MDM1 OS=Mus musculus GN=Mdm1 - [MDM1_MOUSE]                                      | 3.92  | 7 | 2  | 2  | 5  | 1.13 | 0.96 | 0.80 | 1.04 | 0.90 | 1.10 | 0.98 | 1.36 | 1.12 | 1.41 | 1.18 | 1.14 | 0.95 | 74.51  | 9.33   |      |
| H9H9S3   | Zinc finger E-box-binding homeobox 2 OS=Mus musculus GN=Zeb2 PE=2 SV=1 - [H9H9S3_MOUSE]                       | 9.31  | 2 | 8  | 9  | 19 | 1.08 | 1.14 | 1.10 | 0.93 | 0.87 | 1.37 | 1.20 | 1.36 | 1.27 | 1.18 | 1.11 | 1.14 | 1.08 | 136.40 | 6.38   |      |
| Q2EMV9   | Poly [ADP-ribose] polymerase 14 OS=Mus musculus GN=Parp14 PE=1 SV=3 - [PAR14_MOUSE]                           | 0.83  | 2 | 1  | 2  | 3  | 1.08 | 0.92 | 0.85 | 1.17 | 1.08 | 0.94 | 0.87 | 1.36 | 1.26 | 1.31 | 1.22 | 1.57 | 1.46 | 203.67 | 6.79   |      |
| Q9DBS2   | Protein FAM122A OS=Mus musculus GN=Fam122a PE=1 SV=1 - [F122A_MOUSE]                                          | 21.48 | 1 | 4  | 4  | 10 | 1.23 | 1.32 | 1.18 | 1.02 | 0.93 | 1.36 | 1.09 | 1.36 | 1.09 | 1.10 | 1.07 | 1.07 | 0.92 | 30.25  | 6.79   |      |
| E9Q309   | Protein Cep350 OS=Mus musculus GN=Cep350 PE=2 SV=1 - [E9Q309_MOUSE]                                           | 0.81  | 1 | 1  | 3  | 6  | 1.07 | 1.19 | 1.12 | 1.03 | 0.97 | 1.21 | 1.13 | 1.36 | 1.27 | 1.35 | 1.27 | 1.24 | 1.16 | 346.24 | 6.35   |      |
| Q9D824-3 | Isoform 3 of Pre-mRNA 3'-end-processing factor FIP1 OS=Mus musculus GN=Fip111 - [FIP1_MOUSE]                  | 35.82 | 7 | 12 | 12 | 66 | 1.02 | 0.96 | 0.95 | 0.98 | 1.00 | 1.29 | 1.27 | 1.36 | 1.28 | 1.19 | 1.23 | 1.17 | 1.13 | 60.15  | 5.57   |      |
| Q8VE65   | Transcription initiation factor TFIIID subunit 12 OS=Mus musculus GN=Taf12 PE=1 SV=1 - [TAF12_MOUSE]          | 11.80 | 2 | 2  | 2  | 4  | 0.96 | 0.82 | 0.86 | 0.86 | 0.90 | 1.22 | 1.27 | 1.36 | 1.41 | 1.19 | 1.24 | 1.05 | 1.10 | 17.86  | 7.99   |      |

|          |                                                                                                                                   |       |   |    |    |    |      |      |      |      |      |      |      |      |      |      |      |      |      |        |       |
|----------|-----------------------------------------------------------------------------------------------------------------------------------|-------|---|----|----|----|------|------|------|------|------|------|------|------|------|------|------|------|------|--------|-------|
| E9Q5L7   | PHD finger protein 10<br>OS=Mus musculus<br>GN=Phf10 PE=2 SV=2<br>-[E9Q5L7_MOUSE]                                                 | 4.27  | 4 | 1  | 1  | 1  | 1.20 | 1.14 | 0.95 | 1.10 | 0.92 | 1.23 | 1.02 | 1.36 | 1.13 | 1.19 | 0.99 | 1.19 | 1.00 | 26.88  | 5.94  |
| Q9D0V7   | Receptor-binding<br>cancer antigen<br>expressed on SiSo cells<br>OS=Mus musculus<br>GN=Ebag9 PE=1<br>SV=2 -<br>[RCAS1_MOUSE]      | 16.90 | 1 | 2  | 2  | 4  | 1.10 | 1.27 | 0.98 | 1.32 | 1.16 | 1.59 | 1.32 | 1.36 | 1.23 | 1.59 | 1.46 | 1.47 | 1.27 | 24.30  | 6.29  |
| Q8BJ05   | Zinc finger CCCH<br>domain-containing<br>protein 14 OS=Mus<br>musculus GN=Zc3h14<br>PE=1 SV=1 -<br>[ZC3HE_MOUSE]                  | 27.48 | 2 | 2  | 14 | 31 | 0.96 | 0.95 | 0.71 | 0.95 | 0.99 | 1.27 | 1.25 | 1.36 | 1.19 | 1.18 | 1.26 | 1.04 | 1.13 | 82.36  | 7.37  |
| P23506   | Protein-L-<br>isoaspartate(D-<br>aspartate) O-<br>methyltransferase<br>OS=Mus musculus<br>GN=Pemt1 PE=1<br>SV=3 -<br>[PIMT_MOUSE] | 63.44 | 7 | 13 | 13 | 69 | 0.95 | 0.80 | 0.87 | 0.97 | 1.05 | 1.39 | 1.42 | 1.36 | 1.39 | 1.25 | 1.29 | 1.13 | 1.22 | 24.62  | 7.65  |
| O35085   | Homeobox protein<br>ARX OS=Mus<br>musculus GN=Arx<br>PE=2 SV=3 -<br>[ARX_MOUSE]                                                   | 2.66  | 1 | 1  | 1  | 2  | 1.10 | 1.64 | 1.49 | 1.20 | 1.09 | 1.22 | 1.11 | 1.36 | 1.23 | 1.29 | 1.18 | 1.47 | 1.34 | 58.45  | 5.24  |
| Q9CXG3   | Peptidyl-prolyl cis-<br>trans isomerase-like 4<br>OS=Mus musculus<br>GN=Ppil4 PE=2 SV=2<br>[PPIL4_MOUSE]                          | 11.79 | 2 | 4  | 4  | 8  | 1.05 | 1.09 | 0.96 | 0.97 | 0.90 | 1.20 | 1.10 | 1.36 | 1.20 | 1.08 | 1.03 | 1.07 | 0.96 | 57.19  | 6.11  |
| P36993   | Protein phosphatase 1B<br>OS=Mus musculus<br>GN=Ppm1b PE=2<br>SV=1 -<br>[PPM1B_MOUSE]                                             | 30.26 | 5 | 2  | 10 | 32 | 0.88 | 0.88 | 1.01 | 0.92 | 1.05 | 1.04 | 1.18 | 1.36 | 1.55 | 1.09 | 1.25 | 0.96 | 1.10 | 42.77  | 5.19  |
| Q9JIS8   | Solute carrier family 12<br>member 4 OS=Mus<br>musculus GN=Slc12a4<br>PE=1 SV=2 -<br>[S12A4_MOUSE]                                | 4.61  | 2 | 1  | 4  | 8  | 1.11 | 1.11 | 1.00 | 1.08 | 0.97 | 0.91 | 0.81 | 1.36 | 1.23 | 1.21 | 1.09 | 1.71 | 1.54 | 120.55 | 6.67  |
| Q8BM39   | Isoform 2 of Pre-<br>mRNA-splicing factor<br>18 OS=Mus musculus<br>GN=Prpf18 -<br>[PRP18_MOUSE]                                   | 6.86  | 2 | 1  | 1  | 1  | 0.97 | 1.13 | 1.16 | 0.92 | 0.95 | 1.22 | 1.25 | 1.36 | 1.40 | 1.20 | 1.24 | 1.25 | 1.30 | 20.66  | 4.98  |
| G3X9I4   | Aly/REF export factor<br>2 OS=Mus musculus<br>GN=Alyref2 PE=4<br>SV=1 -<br>[G3X9I4_MOUSE]                                         | 18.35 | 2 | 1  | 3  | 22 | 1.15 | 0.85 | 0.74 | 0.93 | 0.81 | 1.22 | 1.06 | 1.36 | 1.18 | 1.29 | 1.12 | 1.28 | 1.11 | 23.77  | 10.14 |
| Q61245-2 | Isoform Short of<br>Collagen alpha-1(XI)<br>chain OS=Mus<br>musculus GN=Col11a1<br>-[COBA1_MOUSE]                                 | 0.52  | 2 | 1  | 1  | 2  | 1.11 | 1.13 | 1.02 | 1.08 | 0.98 | 2.05 | 1.84 | 1.36 | 1.23 | 1.53 | 1.38 | 1.22 | 1.10 | 171.30 | 5.66  |
| Q60596   | DNA repair protein<br>XRCC1 OS=Mus<br>musculus GN=Xrcc1<br>PE=1 SV=2 -<br>[XRCC1_MOUSE]                                           | 5.07  | 1 | 3  | 3  | 4  | 0.96 | 0.88 | 0.83 | 0.83 | 0.88 | 1.33 | 1.20 | 1.36 | 1.23 | 1.15 | 1.05 | 1.15 | 1.04 | 68.93  | 6.33  |

|          |                                                                                                                           |       |    |    |    |     |      |      |      |      |      |      |      |      |      |      |      |      |      |        |      |
|----------|---------------------------------------------------------------------------------------------------------------------------|-------|----|----|----|-----|------|------|------|------|------|------|------|------|------|------|------|------|------|--------|------|
| Q99MR1   | PERQ amino acid-rich with GYF domain-containing protein 1<br>OS=Mus musculus<br>GN=Gigyf1 PE=1<br>SV=2 -<br>[PERQ1_MOUSE] | 11.40 | 1  | 11 | 11 | 23  | 1.04 | 1.04 | 0.95 | 1.00 | 1.00 | 1.30 | 1.14 | 1.36 | 1.18 | 1.24 | 1.10 | 1.17 | 1.04 | 116.17 | 5.39 |
| O08599-2 | Isoform 2 of Syntaxin-binding protein 1<br>OS=Mus musculus<br>GN=Sxbp1 -<br>[STXB1_MOUSE]                                 | 74.13 | 1  | 2  | 44 | 492 | 0.91 | 1.47 | 1.62 | 1.14 | 1.26 | 1.28 | 1.40 | 1.36 | 1.50 | 1.16 | 1.28 | 1.11 | 1.22 | 68.69  | 6.77 |
| Q3UHX0   | Nucleolar protein 8<br>OS=Mus musculus<br>GN=Noi8 PE=1 SV=2 -<br>[NOL8_MOUSE]                                             | 3.84  | 3  | 3  | 3  | 5   | 1.03 | 0.88 | 0.85 | 1.08 | 0.87 | 1.17 | 1.13 | 1.37 | 1.32 | 1.22 | 1.18 | 1.12 | 1.05 | 128.56 | 6.55 |
| E9Q3G8   | Protein Nup153<br>OS=Mus musculus<br>GN=Nup153 PE=2<br>SV=1 -<br>[E9Q3G8_MOUSE]                                           | 17.65 | 1  | 20 | 20 | 46  | 0.98 | 0.96 | 0.98 | 0.99 | 1.00 | 1.30 | 1.37 | 1.37 | 1.42 | 1.25 | 1.28 | 1.10 | 1.19 | 151.91 | 8.84 |
| O35685   | Nuclear migration protein nudC<br>OS=Mus musculus<br>GN=Nudc PE=1 SV=1 -<br>[NUDC_MOUSE]                                  | 56.63 | 1  | 17 | 17 | 43  | 0.98 | 0.80 | 0.84 | 0.93 | 0.96 | 1.35 | 1.34 | 1.37 | 1.34 | 1.23 | 1.24 | 1.10 | 1.12 | 38.33  | 5.26 |
| Q99JX1   | Transcription initiation factor TFIID subunit 11<br>OS=Mus musculus<br>GN=Taf11 PE=2 SV=1 -<br>[TAF11_MOUSE]              | 12.80 | 1  | 1  | 1  | 2   | 1.14 | 1.09 | 0.96 | 0.63 | 0.55 | 1.37 | 1.20 | 1.37 | 1.07 | 1.25 | 0.99 | 1.08 | 0.85 | 23.32  | 5.24 |
| Q8VD37-1 | Isoform 7 of SH3-containing GRB2-like protein 3-interacting protein 1<br>OS=Mus musculus<br>GN=Sgip1 -<br>[SGIP1_MOUSE]   | 49.76 | 6  | 1  | 29 | 151 | 1.06 | 1.48 | 1.40 | 0.84 | 0.79 | 1.01 | 0.95 | 1.37 | 1.29 | 1.25 | 1.18 | 1.24 | 1.18 | 88.50  | 7.47 |
| Q6NX16-2 | Isoform 2 of Regulation of nuclear pre-mRNA domain-containing protein 2<br>OS=Mus musculus<br>GN=Rprd2 -<br>[RPRD2_MOUSE] | 6.04  | 2  | 5  | 5  | 8   | 1.05 | 0.97 | 0.91 | 0.98 | 0.96 | 1.27 | 1.15 | 1.37 | 1.15 | 1.38 | 1.24 | 1.36 | 1.24 | 151.31 | 6.93 |
| Q80Y83-1 | Isoform 11 of Dixin<br>OS=Mus musculus<br>GN=Dixdc1 -<br>[DIXC1_MOUSE]                                                    | 17.72 | 15 | 6  | 6  | 18  | 0.97 | 1.00 | 1.02 | 1.03 | 1.06 | 1.40 | 1.39 | 1.37 | 1.45 | 1.30 | 1.42 | 1.23 | 1.21 | 53.99  | 5.60 |
| Q9CPT5   | Nucleolar protein 16<br>OS=Mus musculus<br>GN=Nop16 PE=2<br>SV=1 -<br>[NOP16_MOUSE]                                       | 3.93  | 2  | 1  | 1  | 1   | 1.07 | 1.17 | 1.09 | 1.09 | 1.02 | 1.32 | 1.23 | 1.37 | 1.28 | 1.11 | 1.04 | 1.02 | 0.96 | 21.13  | 9.91 |
| Q9JJR9   | Nuclear receptor-interacting protein 3<br>OS=Mus musculus<br>GN=Nrip3 PE=2 SV=1 -<br>[NRIP3_MOUSE]                        | 5.00  | 2  | 1  | 1  | 2   | 0.83 | 0.67 | 0.81 | 0.87 | 1.04 | 1.45 | 1.73 | 1.37 | 1.64 | 1.20 | 1.45 | 1.05 | 1.27 | 26.86  | 8.50 |
| Q7TSF4   | Leucine-rich repeat-containing protein FAM211A<br>OS=Mus musculus<br>GN=Fam211a PE=1<br>SV=1 -<br>[F211A_MOUSE]           | 12.68 | 2  | 3  | 3  | 5   | 0.85 | 1.29 | 1.64 | 0.97 | 1.13 | 1.33 | 1.52 | 1.37 | 1.93 | 1.14 | 1.39 | 1.22 | 1.43 | 37.55  | 8.76 |

|          |                                                                                                                                               |       |   |    |    |     |      |      |      |      |      |      |      |      |      |      |      |      |      |       |      |
|----------|-----------------------------------------------------------------------------------------------------------------------------------------------|-------|---|----|----|-----|------|------|------|------|------|------|------|------|------|------|------|------|------|-------|------|
| Q08890   | Iduronate 2-sulfatase<br>OS=Mus musculus<br>GN=Ids PE=2 SV=3 -<br>[IDS_MOUSE]                                                                 | 3.44  | 1 | 1  | 1  | 1   | 1.05 | 1.30 | 1.23 | 1.41 | 1.34 | 0.75 | 0.71 | 1.37 | 1.30 | 1.29 | 1.23 | 1.49 | 1.42 | 62.15 | 5.80 |
| P17742   | Peptidyl-prolyl cis-<br>trans isomerase A<br>OS=Mus musculus<br>GN=Ppia PE=1 SV=2 -<br>[PPIA_MOUSE]                                           | 80.49 | 3 | 16 | 17 | 687 | 0.94 | 0.79 | 0.91 | 0.85 | 0.94 | 1.27 | 1.34 | 1.37 | 1.39 | 1.17 | 1.21 | 1.10 | 1.23 | 17.96 | 7.90 |
| Q60778   | NF-kappa-B inhibitor<br>beta OS=Mus<br>musculus GN=Nfkbib<br>PE=1 SV=2 -<br>[IKBB_MOUSE]                                                      | 4.46  | 1 | 1  | 1  | 1   | 0.90 | 1.05 | 1.16 | 1.01 | 1.12 | 1.39 | 1.54 | 1.37 | 1.52 | 1.26 | 1.40 | 1.20 | 1.34 | 37.94 | 4.74 |
| Q6A068   | Cell division cycle 5-<br>like protein OS=Mus<br>musculus GN=Cdc5l<br>PE=1 SV=2 -<br>[CDC5L_MOUSE]                                            | 31.05 | 1 | 15 | 15 | 40  | 0.92 | 0.90 | 0.99 | 1.03 | 1.05 | 1.32 | 1.43 | 1.37 | 1.44 | 1.18 | 1.29 | 1.07 | 1.15 | 92.13 | 8.02 |
| Q4V9Z5   | Seizure 6-like protein 2<br>OS=Mus musculus<br>GN=Sezf6l2 PE=2<br>SV=1 -<br>[SE6L2_MOUSE]                                                     | 20.11 | 1 | 1  | 13 | 47  | 1.09 | 1.28 | 1.17 | 1.09 | 1.00 | 1.12 | 1.03 | 1.37 | 1.26 | 1.28 | 1.18 | 1.27 | 1.17 | 97.44 | 4.87 |
| Q505H4-3 | Isoform 3 of von<br>Willebrand factor C<br>domain-containing<br>protein 2-like OS=Mus<br>musculus GN=Vwc2l -<br>[VWC2L_MOUSE]                 | 38.10 | 5 | 3  | 3  | 5   | 1.14 | 0.95 | 0.82 | 1.17 | 0.98 | 1.19 | 1.09 | 1.38 | 1.17 | 1.03 | 0.92 | 1.02 | 0.88 | 14.32 | 6.84 |
| Q9DCD5   | Tight junction-<br>associated protein 1<br>OS=Mus musculus<br>GN=Tjap1 PE=1 SV=1<br>- [TJAP1_MOUSE]                                           | 2.23  | 1 | 1  | 1  | 2   | 1.02 | 0.99 | 0.97 | 0.96 | 0.94 | 1.29 | 1.26 | 1.38 | 1.34 | 1.27 | 1.25 | 1.09 | 1.07 | 59.38 | 6.07 |
| D3YUY0   | Carbohydrate<br>sulfotransferase 12<br>(Fragment) OS=Mus<br>musculus GN=Chst12<br>PE=2 SV=1 -<br>[D3YUY0_MOUSE]                               | 10.11 | 2 | 1  | 1  | 1   | 2.12 | 1.72 | 0.81 | 1.65 | 0.78 | 2.14 | 1.01 | 1.38 | 0.65 | 1.35 | 0.64 | 1.22 | 0.58 | 20.56 | 6.27 |
| D3Z7E1   | RING finger and<br>transmembrane domain-<br>containing protein 2<br>(Fragment) OS=Mus<br>musculus GN=Rnf2<br>PE=2 SV=1 -<br>[D3Z7E1_MOUSE]    | 34.48 | 4 | 1  | 1  | 2   | 1.11 | 1.13 | 1.02 | 1.12 | 1.00 | 1.34 | 1.20 | 1.38 | 1.24 | 1.42 | 1.28 | 1.01 | 0.91 | 6.38  | 7.43 |
| Q80TG9   | Leucine-rich repeat and<br>fibronectin type-III<br>domain-containing<br>protein 2 OS=Mus<br>musculus GN=Lrfn2<br>PE=1 SV=2 -<br>[LRFN2_MOUSE] | 5.08  | 1 | 2  | 2  | 4   | 1.22 | 1.09 | 0.88 | 0.87 | 0.71 | 1.41 | 1.14 | 1.38 | 1.12 | 1.17 | 0.96 | 1.19 | 0.98 | 84.91 | 6.74 |
| Q8R409   | Protein HEXIM1<br>OS=Mus musculus<br>GN=Hexim1 PE=1<br>SV=1 -<br>[HEX1_MOUSE]                                                                 | 30.34 | 1 | 7  | 7  | 15  | 0.99 | 1.03 | 1.04 | 1.06 | 1.02 | 1.31 | 1.29 | 1.38 | 1.41 | 1.30 | 1.33 | 1.23 | 1.17 | 40.22 | 5.38 |



|        |                                                                                                 |       |   |   |   |    |      |      |      |      |      |      |      |      |      |      |      |      |      |        |      |
|--------|-------------------------------------------------------------------------------------------------|-------|---|---|---|----|------|------|------|------|------|------|------|------|------|------|------|------|------|--------|------|
| P62915 | Transcription initiation factor IIB OS=Mus musculus GN=Gtf2b PE=1 SV=1 - [TF2B_MOUSE]           | 12.97 | 1 | 3 | 3 | 5  | 0.99 | 0.92 | 0.93 | 1.21 | 1.08 | 1.13 | 1.00 | 1.38 | 1.40 | 1.26 | 1.24 | 1.25 | 1.15 | 34.80  | 8.35 |
| Q8BHD9 | Pre-mRNA-splicing factor SLU7 OS=Mus musculus GN=Slu7 PE=1 SV=1 - [SLU7_MOUSE]                  | 9.57  | 2 | 4 | 4 | 16 | 1.09 | 1.05 | 0.95 | 1.04 | 0.91 | 1.34 | 1.20 | 1.38 | 1.26 | 1.17 | 1.12 | 1.10 | 1.02 | 68.04  | 7.08 |
| Q09XV5 | Isoform 2 of Chromodomain-helicase-DNA-binding protein 8 OS=Mus musculus GN=Chd8 - [CHD8_MOUSE] | 2.26  | 3 | 1 | 1 | 2  | 0.95 | 1.41 | 1.48 | 1.00 | 1.05 | 1.21 | 1.26 | 1.38 | 1.44 | 1.26 | 1.32 | 1.39 | 1.46 | 80.90  | 7.12 |
| P11087 | Collagen alpha-1(I) chain OS=Mus musculus GN=Col1a1 PE=1 SV=4 - [CO1A1_MOUSE]                   | 8.95  | 2 | 9 | 9 | 25 | 1.07 | 0.96 | 0.91 | 1.03 | 0.94 | 3.00 | 2.67 | 1.38 | 1.36 | 1.49 | 1.32 | 1.15 | 1.09 | 137.95 | 5.85 |
| Q8K314 | Rab effector MyRIP OS=Mus musculus GN=Myrip PE=1 SV=1 - [MYRIP_MOUSE]                           | 5.96  | 1 | 3 | 3 | 6  | 1.14 | 0.96 | 0.84 | 1.16 | 1.01 | 1.40 | 1.22 | 1.39 | 1.23 | 1.27 | 1.11 | 1.15 | 1.01 | 94.86  | 6.07 |
| Q91YN9 | BAG family molecular chaperone regulator 2 OS=Mus musculus GN=Bag2 PE=1 SV=1 - [BAG2_MOUSE]     | 16.67 | 1 | 4 | 4 | 9  | 0.95 | 1.07 | 1.17 | 0.90 | 0.97 | 1.28 | 1.36 | 1.39 | 1.54 | 1.26 | 1.35 | 1.20 | 1.39 | 23.46  | 6.42 |
| Q8BQ30 | Phostensin OS=Mus musculus GN=Ppp1r18 PE=1 SV=1 - [PPR18_MOUSE]                                 | 8.42  | 2 | 3 | 3 | 9  | 1.09 | 0.82 | 0.85 | 0.91 | 0.88 | 1.35 | 1.25 | 1.39 | 1.38 | 1.38 | 1.34 | 1.13 | 1.04 | 65.59  | 5.39 |
| E9PZD2 | Protein Micall2 OS=Mus musculus GN=Micall2 PE=2 SV=1 - [E9PZD2_MOUSE]                           | 1.62  | 2 | 1 | 1 | 1  | 0.93 | 1.05 | 1.12 | 0.95 | 1.02 | 1.35 | 1.44 | 1.39 | 1.48 | 1.42 | 1.53 | 1.56 | 1.67 | 98.73  | 9.76 |
| Q8VEE1 | LIM and cysteine-rich domains protein 1 OS=Mus musculus GN=Lmcd1 PE=1 SV=1 - [LMCD1_MOUSE]      | 30.68 | 1 | 9 | 9 | 23 | 0.99 | 0.83 | 0.93 | 0.94 | 0.92 | 1.40 | 1.30 | 1.39 | 1.38 | 1.21 | 1.24 | 1.27 | 1.15 | 40.97  | 7.93 |
| P47880 | Insulin-like growth factor-binding protein 6 OS=Mus musculus GN=Igfbp6 PE=2 SV=2 - [IBP6_MOUSE] | 6.72  | 1 | 2 | 2 | 5  | 1.00 | 1.13 | 1.08 | 1.01 | 0.96 | 1.27 | 1.25 | 1.39 | 1.31 | 1.19 | 1.08 | 1.04 | 1.04 | 25.33  | 8.19 |
| Q08091 | Calponin-1 OS=Mus musculus GN=Cnn1 PE=2 SV=1 - [CNN1_MOUSE]                                     | 25.93 | 2 | 6 | 6 | 12 | 1.03 | 0.87 | 1.05 | 0.88 | 0.95 | 1.03 | 1.00 | 1.39 | 1.37 | 1.74 | 1.64 | 1.03 | 1.02 | 33.33  | 8.97 |
| A2AWK6 | Zinc finger protein ZIC 3 OS=Mus musculus GN=Zic3 PE=2 SV=1 - [A2AWK6_MOUSE]                    | 5.69  | 6 | 1 | 1 | 2  | 0.99 | 0.87 | 0.88 | 1.18 | 1.19 | 1.22 | 1.22 | 1.39 | 1.40 | 1.18 | 1.19 | 1.11 | 1.12 | 27.83  | 8.98 |
| E9Q722 | Upstream stimulatory factor 1 OS=Mus musculus GN=Usf1 PE=2 SV=1 - [E9Q722_MOUSE]                | 13.18 | 2 | 3 | 3 | 4  | 1.00 | 0.86 | 0.89 | 0.97 | 0.98 | 1.40 | 1.40 | 1.39 | 1.44 | 1.41 | 1.42 | 1.23 | 1.23 | 32.00  | 5.50 |

|        |                                                                                                                                           |       |   |    |    |    |      |      |      |      |      |      |      |      |      |      |      |      |      |        |      |
|--------|-------------------------------------------------------------------------------------------------------------------------------------------|-------|---|----|----|----|------|------|------|------|------|------|------|------|------|------|------|------|------|--------|------|
| Q3V113 | Protein Pygo2<br>OS=Mus musculus<br>GN=Pygo2 PE=2<br>SV=1 -<br>[Q3V113_MOUSE]                                                             | 10.87 | 2 | 2  | 2  | 4  | 0.96 | 1.00 | 1.03 | 1.01 | 1.05 | 1.30 | 1.34 | 1.39 | 1.44 | 1.08 | 1.13 | 1.14 | 1.19 | 37.51  | 6.52 |
| Q9D1T5 | Proline-rich protein 15<br>OS=Mus musculus<br>GN=Prr15 PE=2 SV=1<br>- [PRR15_MOUSE]                                                       | 37.70 | 1 | 2  | 2  | 3  | 1.09 | 1.12 | 1.02 | 1.08 | 0.99 | 1.23 | 1.12 | 1.39 | 1.27 | 1.18 | 1.08 | 1.07 | 0.98 | 13.65  | 8.13 |
| B7ZCA7 | Kazrin (Fragment)<br>OS=Mus musculus<br>GN=Kazn PE=2 SV=1<br>[B7ZCA7_MOUSE]                                                               | 42.15 | 1 | 1  | 8  | 21 | 0.86 | 1.12 | 1.30 | 0.95 | 1.11 | 1.21 | 1.40 | 1.39 | 1.61 | 1.40 | 1.64 | 1.22 | 1.42 | 29.61  | 8.54 |
| Q922U2 | Keratin, type II<br>cytoskeletal 5 OS=Mus<br>musculus GN=Krt5<br>PE=1 SV=1 -<br>[K2C5_MOUSE]                                              | 7.59  | 7 | 1  | 5  | 10 | 1.16 | 1.39 | 1.20 | 2.22 | 1.92 | 0.96 | 0.83 | 1.39 | 1.20 | 1.23 | 1.07 | 1.88 | 1.63 | 61.73  | 7.75 |
| G3UYW9 | Protein Trak2 OS=Mus<br>musculus GN=Trak2<br>PE=2 SV=1 -<br>[G3UYW9_MOUSE]                                                                | 7.59  | 2 | 4  | 4  | 6  | 0.93 | 0.76 | 0.94 | 0.79 | 0.90 | 1.17 | 1.32 | 1.39 | 1.42 | 1.03 | 1.11 | 0.88 | 1.04 | 75.65  | 4.93 |
| Q62165 | Dystroglycan OS=Mus<br>musculus GN=Dag1<br>PE=1 SV=4 -<br>[DAG1_MOUSE]                                                                    | 17.47 | 1 | 12 | 12 | 52 | 1.09 | 0.77 | 0.76 | 0.95 | 0.87 | 1.44 | 1.28 | 1.39 | 1.27 | 1.28 | 1.14 | 1.14 | 1.02 | 96.84  | 8.44 |
| Q6NZA9 | Transcription initiation<br>factor TFIID subunit<br>9B OS=Mus musculus<br>GN=Ta9b PE=1 SV=2<br>- [TAF9B_MOUSE]                            | 3.21  | 3 | 1  | 1  | 2  | 1.06 | 0.89 | 0.85 | 0.61 | 0.58 | 0.98 | 0.92 | 1.40 | 1.32 | 0.84 | 0.79 | 0.75 | 0.71 | 27.16  | 9.58 |
| Q7TPE5 | Probable RNA<br>polymerase II nuclear<br>localization protein<br>SLC7A6 OS=Mus<br>musculus<br>GN=Slc7a6os PE=1<br>SV=1 -<br>[S7A6O_MOUSE] | 12.09 | 1 | 3  | 3  | 9  | 1.11 | 1.11 | 0.99 | 1.07 | 0.97 | 1.34 | 1.25 | 1.40 | 1.23 | 1.29 | 1.21 | 1.18 | 1.06 | 35.02  | 4.58 |
| D3YYC2 | Dr1-associated<br>corepressor OS=Mus<br>musculus GN=Drp1<br>PE=2 SV=1 -<br>[D3YYC2_MOUSE]                                                 | 20.37 | 5 | 2  | 2  | 6  | 1.21 | 1.21 | 1.00 | 1.07 | 0.88 | 1.55 | 1.16 | 1.40 | 1.23 | 1.31 | 1.18 | 1.22 | 1.09 | 17.58  | 5.44 |
| F6XLQ6 | FERM domain-<br>containing protein 5<br>(Fragment) OS=Mus<br>musculus GN=Frmf5<br>PE=4 SV=1 -<br>[F6XLQ6_MOUSE]                           | 15.53 | 9 | 1  | 1  | 1  | 1.46 | 1.10 | 0.75 | 1.76 | 1.20 | 1.45 | 0.99 | 1.40 | 0.96 | 1.46 | 1.01 | 1.81 | 1.24 | 22.70  | 7.27 |
| Q6PIJ4 | Nuclear factor related<br>to kappa-B-binding<br>protein OS=Mus<br>musculus GN=Nfkb<br>PE=2 SV=1 -<br>[NFRKB_MOUSE]                        | 2.24  | 1 | 1  | 1  | 4  | 1.05 | 0.79 | 0.75 | 1.06 | 1.05 | 1.29 | 1.23 | 1.40 | 1.29 | 1.28 | 1.22 | 1.08 | 1.03 | 138.68 | 9.22 |
| Q8BHT6 | Isoform 2 of Beta-1,3-<br>glucosyltransferase<br>OS=Mus musculus<br>GN=B3galt1 -<br>[B3GLT_MOUSE]                                         | 19.42 | 2 | 1  | 1  | 1  | 0.80 | 1.38 | 1.72 | 0.97 | 1.21 | 1.28 | 1.59 | 1.40 | 1.74 | 1.19 | 1.48 | 1.10 | 1.37 | 11.87  | 6.25 |

|        |                                                                                                                               |       |   |    |    |     |      |      |      |      |      |      |      |      |      |      |      |      |      |       |      |
|--------|-------------------------------------------------------------------------------------------------------------------------------|-------|---|----|----|-----|------|------|------|------|------|------|------|------|------|------|------|------|------|-------|------|
| Q8BH43 | Wiskott-Aldrich syndrome protein family member 2<br>OS=Mus musculus<br>GN=Wasf2 PE=1<br>SV=1 -<br>[WASF2_MOUSE]               | 13.08 | 1 | 5  | 6  | 16  | 0.93 | 1.09 | 1.07 | 0.90 | 0.90 | 1.33 | 1.37 | 1.40 | 1.35 | 1.31 | 1.42 | 1.19 | 1.31 | 54.04 | 5.53 |
| F8WIA3 | Modulator of apoptosis 1<br>OS=Mus musculus<br>GN=Moap1 PE=2<br>SV=1 -<br>[F8WIA3_MOUSE]                                      | 28.00 | 4 | 1  | 1  | 4   | 1.15 | 1.16 | 1.01 | 1.00 | 0.87 | 1.49 | 1.28 | 1.40 | 1.21 | 1.15 | 1.00 | 1.36 | 1.18 | 7.89  | 4.09 |
| E9QM14 | E3 ubiquitin-protein ligase Hakai<br>OS=Mus musculus<br>GN=Cbl1 PE=2<br>SV=1 -<br>[E9QM14_MOUSE]                              | 12.02 | 5 | 3  | 3  | 9   | 1.02 | 1.33 | 1.33 | 0.96 | 0.99 | 1.28 | 1.26 | 1.40 | 1.38 | 1.21 | 1.21 | 1.41 | 1.32 | 46.40 | 8.62 |
| G3UWD4 | Periphrilin 1, isoform CRA_b<br>OS=Mus musculus<br>GN=Pphln1 PE=4<br>SV=1 -<br>[G3UWD4_MOUSE]                                 | 7.85  | 5 | 2  | 2  | 3   | 1.11 | 0.94 | 0.85 | 1.06 | 0.96 | 1.31 | 1.18 | 1.40 | 1.26 | 1.29 | 1.17 | 1.12 | 1.01 | 33.82 | 6.32 |
| Q9QYP6 | 5-azacytidine-induced protein 2<br>OS=Mus musculus<br>GN=Azi2 PE=1<br>SV=1 -<br>[AZI2_MOUSE]                                  | 28.89 | 5 | 10 | 10 | 24  | 1.07 | 1.01 | 0.98 | 0.98 | 0.92 | 1.29 | 1.20 | 1.40 | 1.17 | 1.29 | 1.12 | 1.17 | 1.08 | 46.06 | 6.70 |
| P38647 | Stress-70 protein, mitochondrial<br>OS=Mus musculus<br>GN=Hspa9 PE=1<br>SV=3 -<br>[GRP75_MOUSE]                               | 56.11 | 1 | 36 | 36 | 295 | 0.93 | 0.88 | 0.96 | 0.90 | 0.99 | 1.36 | 1.46 | 1.40 | 1.49 | 1.25 | 1.35 | 1.10 | 1.18 | 73.42 | 6.07 |
| P43300 | Early growth response protein 3<br>OS=Mus musculus<br>GN=Egr3 PE=2<br>SV=2 -<br>[EGR3_MOUSE]                                  | 9.04  | 1 | 2  | 2  | 7   | 0.98 | 0.96 | 0.98 | 0.99 | 1.03 | 1.53 | 1.49 | 1.40 | 1.40 | 1.37 | 1.38 | 1.19 | 1.19 | 42.61 | 8.35 |
| Q80X32 | UPF0461 protein Csortf24 homolog<br>OS=Mus musculus<br>PE=1 SV=1 -<br>[CE024_MOUSE]                                           | 7.45  | 1 | 1  | 1  | 2   | 1.10 | 0.61 | 0.55 | 1.19 | 1.08 | 1.43 | 1.30 | 1.40 | 1.28 | 1.24 | 1.14 | 1.17 | 1.07 | 20.13 | 9.92 |
| Q8CEG5 | Coiled-coil domain-containing protein 28B<br>OS=Mus musculus<br>GN=Ccdc28b PE=2<br>SV=3 -<br>[CC28B_MOUSE]                    | 21.50 | 4 | 3  | 3  | 6   | 0.82 | 0.83 | 1.10 | 0.89 | 0.90 | 1.29 | 1.60 | 1.41 | 1.70 | 1.01 | 1.23 | 0.99 | 1.21 | 22.02 | 5.36 |
| Q3TC46 | Protein PAT1 homolog 1<br>OS=Mus musculus<br>GN=Pat1 PE=1 SV=2 -<br>[PATL1_MOUSE]                                             | 1.82  | 1 | 1  | 1  | 1   | 1.25 | 1.20 | 0.96 | 1.14 | 0.91 | 1.37 | 1.10 | 1.41 | 1.12 | 1.28 | 1.03 | 1.11 | 0.89 | 86.72 | 6.37 |
| Q5U5M8 | Biogenesis of lysosome-related organelles complex 1 subunit 3<br>OS=Mus musculus<br>GN=Blc1s3 PE=1<br>SV=1 -<br>[BL1S3_MOUSE] | 9.23  | 1 | 1  | 1  | 2   | 1.21 | 1.14 | 0.94 | 1.05 | 0.87 | 1.39 | 1.14 | 1.41 | 1.16 | 1.44 | 1.19 | 1.44 | 1.19 | 20.39 | 4.92 |
| Q8BTG7 | Protein NDRG4<br>OS=Mus musculus<br>GN=Ndr4 PE=1<br>SV=1 -<br>[NDRG4_MOUSE]                                                   | 29.83 | 2 | 2  | 9  | 21  | 1.07 | 1.09 | 1.01 | 1.00 | 0.93 | 1.15 | 1.06 | 1.41 | 1.31 | 1.41 | 1.31 | 1.30 | 1.21 | 38.48 | 6.32 |

|          |                                                                                                                          |       |   |   |    |     |      |      |      |      |      |      |      |      |      |      |      |      |      |        |       |
|----------|--------------------------------------------------------------------------------------------------------------------------|-------|---|---|----|-----|------|------|------|------|------|------|------|------|------|------|------|------|------|--------|-------|
| Q9D2H6   | Isoform 2 of Transcription factor Sp2 OS=Mus musculus GN=Sp2 - [SP2_MOUSE]                                               | 2.48  | 4 | 1 | 1  | 2   | 1.14 | 1.07 | 0.93 | 1.25 | 1.09 | 1.50 | 1.31 | 1.41 | 1.23 | 1.48 | 1.30 | 1.44 | 1.27 | 64.09  | 9.92  |
| F6YLP9   | Pleckstrin homology domain-containing family A member 1 (Fragment) OS=Mus musculus GN=Plekha1 PE=4 SV=1 - [F6YLP9_MOUSE] | 6.45  | 2 | 1 | 1  | 1   | 1.13 | 1.16 | 1.03 | 0.98 | 0.87 | 1.25 | 1.09 | 1.41 | 1.24 | 1.19 | 1.05 | 1.16 | 1.03 | 17.17  | 9.73  |
| Q8BJ64   | Choline dehydrogenase, mitochondrial OS=Mus musculus GN=Cdhb PE=1 SV=1 - [CHDH_MOUSE]                                    | 5.54  | 1 | 2 | 2  | 6   | 0.54 | 0.77 | 1.41 | 0.86 | 1.59 | 0.95 | 2.02 | 1.41 | 2.60 | 1.25 | 2.45 | 0.68 | 1.41 | 66.37  | 8.51  |
| A2A9T0   | Isoform 2 of TANK-binding kinase 1-binding protein 1 OS=Mus musculus GN=Tbkbp1 - [TBKB1_MOUSE]                           | 3.36  | 4 | 1 | 2  | 3   | 1.13 | 0.98 | 0.87 | 1.02 | 0.90 | 1.16 | 1.02 | 1.41 | 1.24 | 1.12 | 0.99 | 1.27 | 1.12 | 65.41  | 5.62  |
| P10637-2 | Isoform Tau-A of Microtubule-associated protein tau OS=Mus musculus GN=Mapt - [TAU_MOUSE]                                | 79.77 | 4 | 1 | 34 | 695 | 1.13 | 1.34 | 1.24 | 0.95 | 0.89 | 1.46 | 1.38 | 1.41 | 1.03 | 1.32 | 1.14 | 1.33 | 1.42 | 44.87  | 8.27  |
| B8JJC1   | Tyrosyl-DNA phosphodiesterase 1 OS=Mus musculus GN=Tdp1 PE=4 SV=1 - [B8JJC1_MOUSE]                                       | 1.64  | 2 | 1 | 1  | 2   | 0.70 | 1.92 | 2.76 | 0.92 | 1.32 | 1.05 | 1.50 | 1.41 | 2.02 | 0.71 | 1.02 | 1.01 | 1.46 | 68.55  | 7.64  |
| Q8BYZ1   | ABI gene family member 3 OS=Mus musculus GN=Abi3 PE=2 SV=3 - [ABI3_MOUSE]                                                | 8.17  | 3 | 2 | 2  | 7   | 0.96 | 1.00 | 1.02 | 0.96 | 0.96 | 1.48 | 1.51 | 1.41 | 1.40 | 1.16 | 1.20 | 1.06 | 1.10 | 39.08  | 5.54  |
| Q99J11   | Musculoskeletal embryonic nuclear protein 1 OS=Mus musculus GN=Mustn1 PE=2 SV=1 - [MSTN1_MOUSE]                          | 18.29 | 1 | 1 | 1  | 2   | 1.07 | 1.00 | 0.93 | 1.03 | 0.96 | 1.41 | 1.31 | 1.41 | 1.31 | 1.24 | 1.15 | 1.12 | 1.05 | 8.94   | 9.64  |
| E9PV59   | Protein Pr24 OS=Mus musculus GN=Pr24 PE=4 SV=1 - [E9PV59_MOUSE]                                                          | 23.08 | 1 | 1 | 1  | 2   | 1.03 | 1.06 | 1.03 | 1.01 | 0.98 | 1.33 | 1.28 | 1.41 | 1.36 | 1.38 | 1.34 | 1.17 | 1.14 | 13.04  | 11.22 |
| E9QLH9   | Tyrosine-protein kinase Sgk223 OS=Mus musculus GN=D8Erd82e PE=4 SV=1 - [E9QLH9_MOUSE]                                    | 4.15  | 2 | 4 | 4  | 8   | 1.14 | 1.27 | 1.08 | 1.12 | 1.02 | 1.30 | 1.14 | 1.42 | 1.24 | 1.25 | 1.09 | 1.17 | 1.05 | 147.85 | 7.36  |
| B9EI21   | Zinc finger matrin type 3 OS=Mus musculus GN=Zmat3 PE=2 SV=1 - [B9EI21_MOUSE]                                            | 10.00 | 2 | 2 | 2  | 5   | 1.05 | 0.89 | 0.90 | 1.12 | 0.96 | 1.41 | 1.13 | 1.42 | 1.11 | 1.33 | 1.09 | 1.01 | 0.96 | 32.03  | 9.11  |
| D3Z4I3   | RNA-binding protein 24 OS=Mus musculus GN=Rbm24 PE=3 SV=1 - [RBM24_MOUSE]                                                | 4.24  | 2 | 1 | 1  | 2   | 1.05 | 0.99 | 0.94 | 1.24 | 1.18 | 1.06 | 1.00 | 1.42 | 1.34 | 1.27 | 1.20 | 1.22 | 1.16 | 24.81  | 8.51  |

|         |                                                                                                           |       |   |   |    |     |      |      |      |      |      |      |      |      |      |      |      |      |      |        |       |
|---------|-----------------------------------------------------------------------------------------------------------|-------|---|---|----|-----|------|------|------|------|------|------|------|------|------|------|------|------|------|--------|-------|
| D3Z6F3  | INO80 complex subunit C OS=Mus musculus GN=Ino80c PE=2 SV=1 - [D3Z6F3_MOUSE]                              | 14.89 | 3 | 1 | 1  | 2   | 0.76 | 1.11 | 1.45 | 0.83 | 1.08 | 1.47 | 1.91 | 1.42 | 1.84 | 1.23 | 1.60 | 1.20 | 1.57 | 9.94   | 10.45 |
| Q8CCF0- | Isoform 2 of U4/U6 small nuclear ribonucleoprotein Prp31 OS=Mus musculus GN=Prp31 - [PRP31_MOUSE]         | 4.26  | 3 | 2 | 2  | 3   | 0.90 | 1.55 | 1.73 | 1.11 | 1.24 | 1.34 | 1.59 | 1.42 | 1.68 | 1.22 | 1.45 | 1.20 | 1.43 | 54.71  | 5.67  |
| P29788  | Vitronectin OS=Mus musculus GN=Vtn PE=1 SV=2 - [VTNC_MOUSE]                                               | 3.77  | 1 | 1 | 1  | 1   | 1.16 | 0.98 | 0.84 | 1.07 | 0.92 | 1.18 | 1.02 | 1.42 | 1.22 | 1.43 | 1.23 | 1.01 | 0.87 | 54.81  | 5.88  |
| P81122  | Insulin receptor substrate 2 OS=Mus musculus GN=Irs2 PE=1 SV=2 - [IRS2_MOUSE]                             | 7.42  | 1 | 5 | 5  | 11  | 1.13 | 1.24 | 1.05 | 1.10 | 0.99 | 1.30 | 1.09 | 1.42 | 1.25 | 1.42 | 1.24 | 1.23 | 1.12 | 136.68 | 8.69  |
| A2AEK3  | Cleavage stimulation factor subunit 2 (Fragment) OS=Mus musculus GN=Cstf2 PE=2 SV=1 - [A2AEK3_MOUSE]      | 36.13 | 1 | 1 | 4  | 9   | 1.17 | 1.49 | 1.27 | 1.38 | 1.18 | 1.50 | 1.27 | 1.42 | 1.21 | 1.42 | 1.21 | 1.35 | 1.16 | 19.32  | 7.75  |
| Q64152  | Transcription factor BTF3 OS=Mus musculus GN=Btf3 PE=2 SV=3 - [BTF3_MOUSE]                                | 48.04 | 2 | 6 | 6  | 31  | 0.98 | 0.80 | 0.88 | 0.93 | 0.91 | 1.35 | 1.29 | 1.42 | 1.26 | 1.27 | 1.11 | 1.04 | 0.99 | 22.02  | 9.52  |
| Q7TQH0- | Isoform 2 of Ataxin-2-like protein OS=Mus musculus GN=Atxn2l - [ATX2L_MOUSE]                              | 29.98 | 3 | 2 | 23 | 77  | 1.14 | 1.22 | 1.05 | 1.00 | 0.90 | 1.13 | 1.05 | 1.42 | 1.25 | 1.16 | 1.07 | 1.29 | 1.24 | 112.97 | 8.59  |
| Q64318  | Zinc finger E-box-binding homeobox 1 OS=Mus musculus GN=Zeb1 PE=1 SV=1 - [ZEB1_MOUSE]                     | 4.03  | 4 | 2 | 3  | 6   | 1.27 | 1.38 | 1.53 | 1.05 | 1.11 | 1.53 | 1.38 | 1.42 | 1.16 | 1.29 | 1.14 | 1.24 | 1.08 | 122.39 | 4.88  |
| A2AL12  | Heterogeneous nuclear ribonucleoprotein A3 OS=Mus musculus GN=Hnrpa3 PE=2 SV=1 - [A2AL12_MOUSE]           | 45.28 | 6 | 2 | 18 | 631 | 0.83 | 0.73 | 0.90 | 0.95 | 1.14 | 1.39 | 1.68 | 1.43 | 1.79 | 1.23 | 1.50 | 0.90 | 1.10 | 34.45  | 9.10  |
| F6TRJ8  | Coiled-coil domain-containing protein 85A (Fragment) OS=Mus musculus GN=Cdc85a PE=4 SV=1 - [F6TRJ8_MOUSE] | 17.36 | 1 | 1 | 2  | 9   | 1.04 | 1.00 | 0.96 | 0.97 | 0.93 | 1.30 | 1.24 | 1.43 | 1.36 | 1.17 | 1.12 | 1.10 | 1.06 | 15.96  | 6.27  |
| F6V035  | Protein Ccdc149 OS=Mus musculus GN=Ccdc149 PE=4 SV=1 - [F6V035_MOUSE]                                     | 16.41 | 1 | 6 | 7  | 15  | 1.06 | 1.04 | 1.03 | 0.97 | 0.91 | 1.48 | 1.44 | 1.43 | 1.37 | 1.13 | 1.13 | 1.10 | 1.03 | 58.83  | 5.57  |
| P33435  | Collagenase 3 OS=Mus musculus GN=Mmp13 PE=1 SV=1 - [MMP13_MOUSE]                                          | 3.18  | 1 | 1 | 1  | 1   | 1.23 | 1.10 | 0.89 | 1.07 | 0.87 | 1.51 | 1.22 | 1.43 | 1.16 | 0.89 | 0.72 | 0.78 | 0.63 | 54.15  | 5.34  |

|          |                                                                                                    |       |    |   |   |     |      |      |      |      |      |      |      |      |      |      |      |      |      |        |       |
|----------|----------------------------------------------------------------------------------------------------|-------|----|---|---|-----|------|------|------|------|------|------|------|------|------|------|------|------|------|--------|-------|
| Q6P5D4   | Centrosomal protein of 135 kDa OS=Mus musculus GN=Cep135 PE=1 SV=1 - [CP135_MOUSE]                 | 1.14  | 1  | 1 | 2 | 3   | 1.06 | 1.14 | 1.08 | 0.95 | 0.89 | 1.19 | 1.12 | 1.43 | 1.34 | 1.19 | 1.12 | 1.14 | 1.08 | 133.26 | 6.48  |
| F8WIX8   | Histone H2A OS=Mus musculus GN=Hist1h2al PE=2 SV=1 - [F8WIX8_MOUSE]                                | 59.20 | 4  | 1 | 7 | 113 | 1.03 | 0.83 | 0.74 | 0.94 | 0.95 | 1.39 | 1.39 | 1.43 | 1.36 | 1.29 | 1.31 | 1.22 | 1.26 | 13.60  | 10.74 |
| Q9CQ25   | Mitotic-spindle organizing protein 2 OS=Mus musculus GN=Mzt2 PE=1 SV=1 [MZT2_MOUSE]                | 22.01 | 1  | 2 | 2 | 4   | 1.02 | 1.00 | 0.98 | 1.04 | 1.03 | 1.37 | 1.34 | 1.43 | 1.40 | 1.34 | 1.32 | 1.12 | 1.10 | 16.51  | 10.18 |
| Q6PGF5   | BMS1 homolog, ribosome assembly protein (Yeast) OS=Mus musculus GN=Bms1 PE=2 SV=1 - [Q6PGF5_MOUSE] | 1.32  | 1  | 1 | 1 | 5   | 1.02 | 1.20 | 1.18 | 1.14 | 1.13 | 1.21 | 1.18 | 1.43 | 1.41 | 1.41 | 1.39 | 1.14 | 1.13 | 145.32 | 6.27  |
| D3YUN2   | Suppressor of tumorigenicity 7 protein OS=Mus musculus GN=St7 PE=2 SV=1 - [D3YUN2_MOUSE]           | 6.56  | 11 | 1 | 1 | 2   | 2.13 | 2.96 | 1.38 | 1.48 | 0.69 | 1.05 | 0.49 | 1.44 | 0.67 | 1.49 | 0.70 | 0.96 | 0.45 | 57.41  | 7.56  |
| Q8CDM3   | X-linked retinitis pigmentosa GTPase regulator OS=Mus musculus GN=Rpgr PE=2 SV=1 - [Q8CDM3_MOUSE]  | 1.54  | 10 | 1 | 2 | 2   | 1.08 | 0.94 | 0.87 | 1.20 | 1.11 | 1.42 | 1.32 | 1.44 | 1.33 | 1.30 | 1.21 | 1.40 | 1.30 | 108.39 | 4.64  |
| Q8K207   | Uncharacterized protein C1orf21 homolog OS=Mus musculus PE=1 SV=1 - [CA021_MOUSE]                  | 20.66 | 1  | 2 | 2 | 4   | 0.93 | 0.93 | 0.92 | 0.95 | 0.86 | 1.20 | 1.06 | 1.44 | 1.28 | 1.18 | 0.93 | 0.99 | 0.92 | 13.87  | 5.22  |
| B2RUJ8   | Rho GTPase activating protein 12 OS=Mus musculus GN=Arhgap12 PE=2 SV=1 - [B2RUJ8_MOUSE]            | 1.11  | 2  | 1 | 1 | 1   | 0.96 | 1.13 | 1.17 | 1.04 | 1.08 | 1.04 | 1.08 | 1.44 | 1.49 | 1.28 | 1.34 | 1.22 | 1.27 | 92.60  | 7.96  |
| Q80XJ2   | E3 ubiquitin-protein ligase RNF168 OS=Mus musculus GN=Rnf168 PE=2 SV=3 - [RN168_MOUSE]             | 3.89  | 3  | 2 | 2 | 10  | 1.00 | 0.98 | 0.90 | 1.08 | 1.07 | 1.28 | 1.22 | 1.44 | 1.41 | 1.26 | 1.18 | 1.09 | 1.07 | 64.74  | 5.59  |
| Q9R0U9   | Protein Tex21 OS=Mus musculus GN=Tex21 PE=2 SV=1 - [Q9R0U9_MOUSE]                                  | 1.91  | 1  | 1 | 1 | 1   | 2.11 | 1.24 | 0.58 | 1.34 | 0.63 | 1.16 | 0.55 | 1.44 | 0.68 | 1.11 | 0.52 | 2.87 | 1.36 | 65.37  | 7.72  |
| Q7TPQ3-5 | Isoform 3 of E3 ubiquitin-protein ligase SHPRH OS=Mus musculus GN=Shprh - [SHPRH_MOUSE]            | 1.16  | 4  | 1 | 1 | 1   | 1.17 | 1.16 | 0.99 | 1.35 | 1.15 | 1.45 | 1.23 | 1.44 | 1.22 | 1.13 | 0.97 | 0.72 | 0.61 | 117.98 | 7.75  |
| Q8BR63   | Protein FAM177A1 OS=Mus musculus GN=Fam177a1 PE=2 SV=1 - [F177A_MOUSE]                             | 30.43 | 1  | 5 | 5 | 12  | 1.01 | 1.07 | 1.01 | 1.00 | 1.03 | 1.23 | 1.33 | 1.44 | 1.44 | 1.15 | 1.22 | 1.27 | 1.36 | 23.56  | 4.59  |

|           |                                                                                                               |       |   |   |   |    |      |      |      |      |      |      |      |      |      |      |      |      |      |        |       |
|-----------|---------------------------------------------------------------------------------------------------------------|-------|---|---|---|----|------|------|------|------|------|------|------|------|------|------|------|------|------|--------|-------|
| Q9DAW9    | Calponin-3 OS=Mus musculus GN=Cnn3 PE=2 SV=1 - [CNN3_MOUSE]                                                   | 39.39 | 3 | 9 | 9 | 30 | 0.92 | 0.95 | 0.95 | 1.02 | 1.04 | 1.45 | 1.43 | 1.44 | 1.52 | 1.34 | 1.33 | 1.18 | 1.21 | 36.41  | 5.72  |
| Q9CPX8    | Cytochrome b-c1 complex subunit 10 OS=Mus musculus GN=Uqcr11 PE=2 SV=1 - [QCR10_MOUSE]                        | 21.43 | 1 | 1 | 1 | 3  | 1.18 | 0.76 | 0.64 | 1.20 | 1.01 | 1.48 | 1.25 | 1.44 | 1.21 | 1.31 | 1.27 | 1.18 | 1.02 | 6.53   | 9.82  |
| Q9CTN8    | Lipoma HMGIC fusion partner-like 3 protein OS=Mus musculus GN=Lhfp13 PE=2 SV=2 - [LHPL3_MOUSE]                | 4.50  | 1 | 1 | 1 | 1  | 0.55 | 0.79 | 1.42 | 0.80 | 1.44 | 0.87 | 1.56 | 1.44 | 2.60 | 1.20 | 2.17 | 0.81 | 1.47 | 24.67  | 5.95  |
| Q8CJF7    | Protein ELYS OS=Mus musculus GN=Abctf1 PE=1 SV=1 - [ELYS_MOUSE]                                               | 2.45  | 1 | 4 | 4 | 7  | 1.01 | 1.21 | 1.22 | 1.13 | 1.15 | 1.15 | 1.13 | 1.44 | 1.30 | 1.31 | 1.36 | 1.40 | 1.30 | 247.49 | 6.55  |
| P42866-12 | Isoform 13 of Mu-type opioid receptor OS=Mus musculus GN=Oprm1 - [OPRM_MOUSE]                                 | 2.21  | 1 | 1 | 1 | 1  | 0.81 | 1.03 | 1.27 | 1.03 | 1.27 | 1.37 | 1.68 | 1.44 | 1.78 | 1.12 | 1.39 | 1.20 | 1.48 | 50.68  | 9.07  |
| POC0S6    | Histone H2A.Z OS=Mus musculus GN=H2afz PE=1 SV=2 - [H2AZ_MOUSE]                                               | 53.91 | 5 | 3 | 5 | 55 | 0.97 | 0.86 | 0.86 | 0.97 | 0.85 | 1.35 | 1.34 | 1.44 | 1.43 | 1.20 | 1.22 | 0.97 | 0.96 | 13.54  | 10.58 |
| Q80TJ7    | Histone lysine demethylase PHF8 OS=Mus musculus GN=Phf8 PE=1 SV=2 - [PHF8_MOUSE]                              | 3.71  | 2 | 2 | 2 | 3  | 1.16 | 1.32 | 1.13 | 1.19 | 1.02 | 1.15 | 0.99 | 1.44 | 1.24 | 1.53 | 1.32 | 1.51 | 1.30 | 113.48 | 8.44  |
| Q9ETS4-3  | Isoform 3 of Palladin OS=Mus musculus GN=Palld - [PALLD_MOUSE]                                                | 1.36  | 6 | 1 | 1 | 2  | 1.05 | 1.85 | 1.76 | 0.90 | 0.85 | 1.06 | 1.00 | 1.45 | 1.37 | 1.34 | 1.28 | 1.13 | 1.07 | 72.32  | 7.68  |
| Q9D952    | Envoplakin OS=Mus musculus GN=Evpl PE=2 SV=3 - [EVPL_MOUSE]                                                   | 0.69  | 1 | 1 | 2 | 3  | 1.17 | 1.05 | 0.90 | 0.97 | 0.82 | 1.41 | 1.20 | 1.45 | 1.23 | 1.49 | 1.27 | 1.15 | 0.98 | 231.87 | 6.60  |
| P29268    | Connective tissue growth factor OS=Mus musculus GN=Ctgf PE=2 SV=3 - [CTGF_MOUSE]                              | 9.20  | 2 | 3 | 3 | 7  | 0.97 | 1.11 | 1.20 | 0.98 | 1.00 | 1.13 | 1.21 | 1.45 | 1.62 | 1.15 | 1.28 | 1.08 | 1.23 | 37.80  | 7.81  |
| Q9QZC2    | Plexin-C1 OS=Mus musculus GN=Plxnc1 PE=1 SV=1 - [PLXC1_MOUSE]                                                 | 1.97  | 1 | 2 | 2 | 3  | 1.08 | 1.73 | 1.59 | 1.20 | 1.10 | 1.17 | 1.07 | 1.45 | 1.33 | 1.53 | 1.41 | 1.51 | 1.39 | 176.36 | 7.75  |
| P21126    | Ubiquitin-like protein 4A OS=Mus musculus GN=Ubl4a PE=2 SV=1 - [UBL4A_MOUSE]                                  | 35.67 | 1 | 5 | 5 | 15 | 0.96 | 0.91 | 0.89 | 0.96 | 0.98 | 1.54 | 1.52 | 1.45 | 1.47 | 1.34 | 1.38 | 1.28 | 1.35 | 17.79  | 8.44  |
| Q3U962    | Collagen alpha-2(V) chain OS=Mus musculus GN=Col5a2 PE=1 SV=1 - [CO5A2_MOUSE]                                 | 1.67  | 1 | 1 | 1 | 2  | 1.02 | 1.34 | 1.31 | 1.09 | 1.06 | 1.44 | 1.40 | 1.45 | 1.42 | 1.40 | 1.38 | 1.51 | 1.48 | 144.93 | 6.70  |
| Q5EG47    | 5'-AMP-activated protein kinase catalytic subunit alpha-1 OS=Mus musculus GN=Prkaa1 PE=1 SV=2 - [AAPK1_MOUSE] | 7.69  | 1 | 1 | 3 | 4  | 1.26 | 1.22 | 0.97 | 1.10 | 0.87 | 1.61 | 1.27 | 1.45 | 1.15 | 1.38 | 1.09 | 1.01 | 0.80 | 63.89  | 8.12  |

|          |                                                                                                           |       |    |    |    |     |      |      |      |      |      |      |      |      |      |      |      |      |      |        |       |
|----------|-----------------------------------------------------------------------------------------------------------|-------|----|----|----|-----|------|------|------|------|------|------|------|------|------|------|------|------|------|--------|-------|
| Q3UQU0   | Bromodomain-containing protein 9<br>OS=Mus musculus<br>GN=Brd9 PE=2 SV=1 -<br>[BRD9_MOUSE]                | 2.01  | 1  | 1  | 1  | 2   | 0.95 | 1.37 | 1.44 | 0.97 | 1.02 | 1.23 | 1.30 | 1.45 | 1.53 | 0.97 | 1.03 | 1.04 | 1.11 | 66.80  | 6.27  |
| Q6ZWQ9   | MCG5400 OS=Mus musculus<br>GN=My112a PE=2 SV=1 -<br>[Q6ZWQ9_MOUSE]                                        | 51.74 | 3  | 1  | 7  | 163 | 1.21 | 1.50 | 1.31 | 1.16 | 0.99 | 1.32 | 1.13 | 1.45 | 1.24 | 1.55 | 1.30 | 1.64 | 1.35 | 19.88  | 4.81  |
| Q9EQU5-  | Isoform 2 of Protein SET<br>OS=Mus musculus<br>GN=Set -<br>[SET_MOUSE]                                    | 55.23 | 1  | 2  | 12 | 193 | 0.79 | 1.19 | 1.50 | 0.89 | 1.09 | 1.40 | 1.77 | 1.45 | 1.84 | 1.04 | 1.06 | 1.10 | 1.02 | 32.09  | 4.22  |
| Q9R257   | Heme-binding protein 1<br>OS=Mus musculus<br>GN=Hebp1 PE=1 SV=2 -<br>[HEBP1_MOUSE]                        | 62.11 | 1  | 7  | 7  | 16  | 0.99 | 0.85 | 0.82 | 0.98 | 1.02 | 1.36 | 1.42 | 1.45 | 1.50 | 1.40 | 1.40 | 1.32 | 1.35 | 21.05  | 5.26  |
| P48432   | Transcription factor SOX-2<br>OS=Mus musculus<br>GN=Sox2 PE=1 SV=2 -<br>[SOX2_MOUSE]                      | 6.27  | 2  | 1  | 1  | 4   | 1.16 | 1.27 | 1.09 | 1.27 | 1.10 | 1.27 | 1.09 | 1.45 | 1.25 | 1.32 | 1.14 | 1.30 | 1.13 | 34.43  | 9.82  |
| P49919-2 | Isoform KIP2b of Cyclin-dependent kinase inhibitor 1C<br>OS=Mus musculus<br>GN=Cdkn1c -<br>[CDN1C_MOUSE]  | 5.07  | 2  | 1  | 1  | 2   | 1.04 | 1.15 | 1.10 | 1.03 | 0.99 | 1.39 | 1.33 | 1.46 | 1.39 | 1.33 | 1.28 | 1.26 | 1.21 | 35.88  | 4.26  |
| Q8R0S1   | Cyclic AMP-dependent transcription factor ATF-7<br>OS=Mus musculus<br>GN=Atf7 PE=1 SV=1 -<br>[ATF7_MOUSE] | 7.99  | 2  | 1  | 3  | 6   | 1.18 | 1.49 | 1.26 | 1.10 | 0.94 | 1.46 | 1.24 | 1.46 | 1.23 | 1.43 | 1.21 | 1.55 | 1.32 | 44.58  | 8.35  |
| Q61595-1 | Isoform 14 of Kinetin<br>OS=Mus musculus<br>GN=Ktn1 -<br>[KTN1_MOUSE]                                     | 44.75 | 11 | 2  | 45 | 110 | 1.22 | 1.17 | 1.13 | 1.27 | 1.14 | 1.82 | 1.57 | 1.46 | 1.20 | 1.45 | 1.47 | 1.42 | 1.17 | 141.00 | 6.27  |
| E9Q8M1   | Protein Zip358<br>OS=Mus musculus<br>GN=Zip358 PE=4 SV=1 -<br>[E9Q8M1_MOUSE]                              | 1.75  | 1  | 1  | 1  | 3   | 0.76 | 1.10 | 1.45 | 1.03 | 0.95 | 1.28 | 1.51 | 1.46 | 1.01 | 1.41 | 1.87 | 1.31 | 1.74 | 59.75  | 7.01  |
| P27661   | Histone H2A.x<br>OS=Mus musculus<br>GN=H2afx PE=1 SV=2 -<br>[H2AX_MOUSE]                                  | 60.14 | 1  | 2  | 8  | 88  | 1.21 | 1.09 | 0.84 | 1.23 | 1.14 | 1.26 | 1.28 | 1.46 | 1.82 | 1.16 | 0.95 | 1.30 | 1.36 | 15.13  | 10.74 |
| O88685   | 26S protease regulatory subunit 6A<br>OS=Mus musculus<br>GN=Psmc3 PE=1 SV=2 -<br>[PRS6A_MOUSE]            | 64.71 | 4  | 21 | 21 | 65  | 0.90 | 0.97 | 1.01 | 0.94 | 1.02 | 1.41 | 1.48 | 1.46 | 1.57 | 1.32 | 1.41 | 1.17 | 1.23 | 49.52  | 5.19  |
| O54791   | Transcription factor MafF<br>OS=Mus musculus<br>GN=Maff PE=2 SV=1 -<br>[MAFF_MOUSE]                       | 4.49  | 3  | 1  | 1  | 1   | 0.97 | 0.94 | 0.97 | 0.85 | 0.88 | 1.27 | 1.30 | 1.46 | 1.50 | 1.22 | 1.26 | 1.11 | 1.14 | 16.94  | 9.80  |
| Q80UP8   | Sodium-dependent phosphate transporter 2<br>OS=Mus musculus<br>GN=Slc20a2 PE=1 SV=2 -<br>[S20A2_MOUSE]    | 1.98  | 1  | 1  | 1  | 4   | 1.42 | 1.15 | 0.81 | 1.19 | 0.82 | 1.20 | 0.84 | 1.46 | 1.02 | 1.17 | 0.82 | 0.84 | 0.86 | 70.82  | 6.48  |



|          |                                                                                                            |       |   |    |    |    |      |      |      |      |      |      |      |      |      |      |      |      |      |        |      |
|----------|------------------------------------------------------------------------------------------------------------|-------|---|----|----|----|------|------|------|------|------|------|------|------|------|------|------|------|------|--------|------|
| Q64314-2 | Isoform Short of Hematopoietic progenitor cell antigen CD34 OS=Mus musculus GN=Cd34 - [CD34_MOUSE]         | 18.77 | 1 | 1  | 7  | 24 | 0.77 | 1.19 | 1.54 | 0.82 | 1.06 | 1.10 | 1.42 | 1.46 | 1.89 | 1.11 | 1.44 | 0.96 | 1.25 | 35.24  | 5.16 |
| Q61189   | Methylome subunit pICln OS=Mus musculus GN=Clns1a PE=1 SV=1 - [ICLN_MOUSE]                                 | 53.39 | 1 | 1  | 7  | 42 | 1.09 | 0.84 | 0.76 | 1.06 | 0.97 | 1.31 | 1.19 | 1.46 | 1.33 | 1.26 | 1.15 | 1.04 | 0.95 | 26.00  | 4.12 |
| Q8C1D8   | Protein IWS1 homolog OS=Mus musculus GN=Iws1 PE=1 SV=1 - [IWS1_MOUSE]                                      | 9.79  | 2 | 5  | 6  | 11 | 1.11 | 0.85 | 0.72 | 1.05 | 0.93 | 1.41 | 1.26 | 1.47 | 1.29 | 1.35 | 1.21 | 1.21 | 1.08 | 85.20  | 4.67 |
| Q5XJE5   | RNA polymerase-associated protein LEO1 OS=Mus musculus GN=Leo1 PE=1 SV=2 - [LEO1_MOUSE]                    | 8.55  | 2 | 5  | 5  | 7  | 1.24 | 0.97 | 0.78 | 1.03 | 0.87 | 1.35 | 1.08 | 1.47 | 1.18 | 1.34 | 1.08 | 1.26 | 1.02 | 75.55  | 4.46 |
| Q8C1S0   | Mediator of RNA polymerase II transcription subunit 19 OS=Mus musculus GN=Med19 PE=1 SV=1 - [MED19_MOUSE]  | 10.25 | 1 | 1  | 1  | 3  | 1.07 | 0.79 | 0.73 | 1.22 | 1.14 | 1.28 | 1.18 | 1.47 | 1.36 | 1.39 | 1.30 | 1.42 | 1.32 | 26.25  | 9.88 |
| E9Q0F0   | Protein Krt78 OS=Mus musculus GN=Krt78 PE=2 SV=1 - [E9Q0F0_MOUSE]                                          | 1.78  | 1 | 1  | 2  | 2  | 1.52 | 1.41 | 0.92 | 1.31 | 0.86 | 0.84 | 0.55 | 1.47 | 0.96 | 1.03 | 0.68 | 2.49 | 1.63 | 112.19 | 7.97 |
| Q7TSH6   | Protein Scaf4 OS=Mus musculus GN=Scaf4 PE=2 SV=1 - [Q7TSH6_MOUSE]                                          | 2.87  | 2 | 2  | 2  | 2  | 1.23 | 1.55 | 1.26 | 1.30 | 1.06 | 1.20 | 0.97 | 1.47 | 1.19 | 1.12 | 0.91 | 1.11 | 0.91 | 128.97 | 9.64 |
| Q8BKZ9   | Pyruvate dehydrogenase protein X component, mitochondrial OS=Mus musculus GN=Pdhx PE=2 SV=1 - [ODPX_MOUSE] | 31.74 | 3 | 11 | 11 | 87 | 0.95 | 0.98 | 1.11 | 0.99 | 1.02 | 1.38 | 1.42 | 1.47 | 1.53 | 1.34 | 1.38 | 1.19 | 1.22 | 53.97  | 7.75 |
| Q61702   | Inter-alpha-trypsin inhibitor heavy chain H1 OS=Mus musculus GN=Itih1 PE=1 SV=2 - [ITIH1_MOUSE]            | 3.09  | 2 | 1  | 1  | 4  | 1.60 | 1.23 | 0.77 | 0.86 | 0.54 | 1.35 | 0.84 | 1.47 | 0.92 | 1.52 | 0.95 | 1.39 | 0.87 | 101.00 | 6.96 |
| Q3USHI   | Protein FAM196A OS=Mus musculus GN=Fam196a PE=2 SV=1 - [F196A_MOUSE]                                       | 8.77  | 2 | 3  | 3  | 5  | 1.00 | 0.88 | 0.88 | 0.94 | 0.91 | 1.49 | 1.25 | 1.47 | 1.44 | 1.43 | 1.37 | 1.52 | 1.42 | 46.19  | 7.14 |
| A2A7S8   | Uncharacterized protein KIAA1522 OS=Mus musculus GN=Kiaa1522 PE=1 SV=1 - [K1522_MOUSE]                     | 17.47 | 4 | 9  | 9  | 15 | 1.08 | 1.35 | 1.26 | 1.05 | 0.92 | 1.48 | 1.25 | 1.47 | 1.28 | 1.37 | 1.22 | 1.09 | 1.08 | 104.78 | 9.69 |
| F7BGR7   | RNA-binding protein 4 OS=Mus musculus GN=Rbm4 PE=4 SV=1 - [F7BGR7_MOUSE]                                   | 25.37 | 9 | 1  | 11 | 19 | 1.01 | 0.95 | 0.93 | 1.52 | 1.51 | 1.67 | 1.64 | 1.47 | 1.45 | 1.49 | 1.47 | 1.22 | 1.21 | 52.76  | 7.30 |

|          |                                                                                                     |       |   |   |    |    |      |      |      |      |      |      |      |      |      |      |      |      |      |        |       |
|----------|-----------------------------------------------------------------------------------------------------|-------|---|---|----|----|------|------|------|------|------|------|------|------|------|------|------|------|------|--------|-------|
| Q5ND52   | RNA methyltransferase-like protein 1 OS=Mus musculus GN=Rnmt11 PE=2 SV=1 - [RMTL1_MOUSE]            | 2.63  | 1 | 1 | 1  | 1  | 1.04 | 1.32 | 1.26 | 0.97 | 0.93 | 1.14 | 1.08 | 1.48 | 1.41 | 1.31 | 1.26 | 1.18 | 1.13 | 46.77  | 9.39  |
| Q7TPG8   | Protein FAM19A1 OS=Mus musculus GN=Fam19a1 PE=2 SV=1 - [F19A1_MOUSE]                                | 11.28 | 1 | 1 | 1  | 2  | 1.12 | 0.87 | 0.77 | 0.94 | 0.84 | 1.31 | 1.16 | 1.48 | 1.31 | 1.46 | 1.31 | 1.31 | 1.16 | 14.86  | 8.12  |
| Q5SQM0   | Echinoderm microtubule-associated protein-like 6 OS=Mus musculus GN=Eml6 PE=2 SV=1 - [EMAL6_MOUSE]  | 0.66  | 1 | 1 | 1  | 1  | 1.04 | 1.40 | 1.34 | 1.20 | 1.15 | 1.19 | 1.14 | 1.48 | 1.41 | 1.51 | 1.46 | 1.26 | 1.22 | 217.80 | 7.42  |
| Q921N8   | G protein pathway suppressor 2 OS=Mus musculus GN=Gps2 PE=2 SV=1 - [Q921N8_MOUSE]                   | 3.36  | 1 | 1 | 1  | 2  | 1.00 | 1.29 | 1.29 | 0.96 | 0.97 | 1.09 | 1.09 | 1.48 | 1.48 | 1.19 | 1.19 | 1.32 | 1.33 | 36.71  | 9.60  |
| D3YY34   | Polyhomeotic-like protein 3 OS=Mus musculus GN=Pnc3 PE=4 SV=1 - [D3YY34_MOUSE]                      | 4.43  | 7 | 2 | 2  | 8  | 0.88 | 3.30 | 3.75 | 0.94 | 1.07 | 1.25 | 1.42 | 1.48 | 1.69 | 1.16 | 1.33 | 1.05 | 1.20 | 102.08 | 6.65  |
| P97783   | Protein AF1q OS=Mus musculus GN=Mlt11 PE=2 SV=1 - [AF1Q_MOUSE]                                      | 80.00 | 1 | 5 | 5  | 8  | 1.00 | 0.95 | 1.08 | 0.94 | 0.94 | 1.57 | 1.56 | 1.49 | 1.74 | 1.42 | 1.42 | 1.16 | 1.20 | 10.02  | 4.41  |
| P70695   | Fructose-1,6-bisphosphatase isozyme 2 OS=Mus musculus GN=Fbp2 PE=2 SV=2 - [F16P2_MOUSE]             | 2.95  | 1 | 1 | 1  | 1  | 1.58 | 1.22 | 0.77 | 1.44 | 0.91 | 1.23 | 0.77 | 1.49 | 0.94 | 0.96 | 0.61 | 1.06 | 0.67 | 36.92  | 6.16  |
| O88990   | Alpha-actinin-3 OS=Mus musculus GN=Actn3 PE=2 SV=1 - [ACTN3_MOUSE]                                  | 15.89 | 1 | 1 | 16 | 83 | 1.02 | 1.39 | 1.37 | 1.02 | 1.00 | 1.05 | 1.03 | 1.49 | 1.46 | 1.54 | 1.51 | 1.56 | 1.54 | 102.98 | 5.45  |
| Q8C790-2 | Isoform 2 of Protein FAM221A OS=Mus musculus GN=Fam221a - [F221A_MOUSE]                             | 6.98  | 2 | 1 | 1  | 2  | 1.08 | 1.07 | 0.98 | 1.10 | 1.01 | 1.63 | 1.50 | 1.49 | 1.37 | 1.44 | 1.32 | 1.37 | 1.26 | 28.32  | 7.53  |
| Q8BMK5   | Isoform 2 of Uncharacterized protein C12orf68 homolog OS=Mus musculus - [CL068_MOUSE]               | 19.08 | 3 | 2 | 2  | 4  | 1.16 | 1.37 | 1.18 | 0.93 | 0.80 | 1.20 | 1.03 | 1.49 | 1.28 | 1.04 | 0.90 | 1.19 | 1.03 | 16.20  | 4.27  |
| Q9D173   | Mitochondrial import receptor subunit TOM7 homolog OS=Mus musculus GN=Tom7 PE=3 SV=1 - [TOM7_MOUSE] | 25.45 | 1 | 1 | 1  | 2  | 1.23 | 0.98 | 0.80 | 0.92 | 0.75 | 1.53 | 1.24 | 1.49 | 1.21 | 1.14 | 0.93 | 1.47 | 1.20 | 6.17   | 10.17 |
| Q8CE50   | N-alpha-acetyltransferase 30 OS=Mus musculus GN=Naa30 PE=2 SV=2 - [NAA30_MOUSE]                     | 15.11 | 3 | 3 | 3  | 7  | 1.24 | 1.14 | 0.92 | 1.12 | 0.99 | 1.49 | 1.20 | 1.49 | 1.27 | 1.34 | 1.16 | 1.26 | 1.01 | 39.41  | 5.64  |
| Q9CY62   | E3 ubiquitin-protein ligase RNF181 OS=Mus musculus GN=Rnf181 PE=2 SV=1 - [RN181_MOUSE]              | 32.73 | 5 | 4 | 4  | 11 | 1.19 | 0.94 | 0.84 | 1.11 | 0.99 | 1.41 | 1.10 | 1.49 | 1.09 | 1.25 | 1.08 | 1.09 | 0.89 | 19.09  | 6.04  |

|          |                                                                                                             |       |   |    |    |    |      |      |      |      |      |      |      |      |      |      |      |      |      |        |       |
|----------|-------------------------------------------------------------------------------------------------------------|-------|---|----|----|----|------|------|------|------|------|------|------|------|------|------|------|------|------|--------|-------|
| P98063   | Bone morphogenetic protein 1 OS=Mus musculus GN=Bmp1 PE=1 SV=2 - [BMP1_MOUSE]                               | 1.61  | 1 | 1  | 1  | 2  | 1.52 | 1.22 | 0.80 | 1.33 | 0.87 | 1.49 | 0.98 | 1.50 | 0.98 | 1.17 | 0.78 | 0.98 | 0.65 | 111.60 | 6.95  |
| Q9D0D5   | General transcription factor IIE subunit 1 OS=Mus musculus GN=Gtf2e1 PE=2 SV=1 - [T2EA_MOUSE]               | 2.73  | 1 | 1  | 1  | 2  | 0.96 | 1.14 | 1.19 | 0.98 | 1.02 | 1.08 | 1.12 | 1.50 | 1.56 | 1.43 | 1.49 | 1.47 | 1.54 | 49.56  | 4.86  |
| Q9CXL6   | Doublecortin, isoform CRA_a OS=Mus musculus GN=Dcx PE=2 SV=1 - [Q9CXL6_MOUSE]                               | 5.83  | 3 | 1  | 2  | 3  | 1.29 | 1.51 | 1.17 | 1.28 | 0.99 | 1.63 | 1.25 | 1.50 | 1.15 | 1.42 | 1.10 | 1.28 | 0.99 | 39.96  | 9.39  |
| P28481-2 | Isoform 3 of Collagen alpha-1(II) chain OS=Mus musculus GN=Col2a1 - [CO2A1_MOUSE]                           | 2.37  | 7 | 2  | 2  | 3  | 1.50 | 0.97 | 0.65 | 1.21 | 0.81 | 3.99 | 2.65 | 1.50 | 1.00 | 1.54 | 1.03 | 1.28 | 0.86 | 131.78 | 8.25  |
| J3QQ44   | Endophilin-A3 OS=Mus musculus GN=Sh3gl3 PE=4 SV=1 - [J3QQ44_MOUSE]                                          | 45.19 | 3 | 1  | 10 | 28 | 1.02 | 1.27 | 1.24 | 1.22 | 1.19 | 1.47 | 1.43 | 1.50 | 1.46 | 1.60 | 1.57 | 1.41 | 1.38 | 35.08  | 5.03  |
| Q64522   | Histone H2A type 2-B OS=Mus musculus GN=Hist2h2ab PE=1 SV=3 - [H2A2B_MOUSE]                                 | 60.00 | 1 | 1  | 6  | 68 | 1.09 | 1.13 | 1.03 | 1.06 | 0.97 | 1.39 | 1.26 | 1.50 | 1.37 | 1.35 | 1.24 | 1.46 | 1.34 | 14.00  | 10.89 |
| Q3U1D0-  | Isoform 2 of Protein Lines homolog OS=Mus musculus GN=Lins - [LINES_MOUSE]                                  | 3.61  | 3 | 1  | 1  | 1  | 0.81 | 0.97 | 1.19 | 1.15 | 1.42 | 1.27 | 1.56 | 1.50 | 1.85 | 1.42 | 1.76 | 1.25 | 1.54 | 55.42  | 6.48  |
| Q7TN02   | Mediator of RNA polymerase II transcription subunit 26 OS=Mus musculus GN=Med26 PE=2 SV=1 - [MED26_MOUSE]   | 8.50  | 1 | 2  | 2  | 4  | 1.22 | 0.95 | 0.78 | 1.04 | 0.83 | 1.33 | 1.08 | 1.50 | 1.23 | 0.85 | 0.70 | 0.95 | 0.78 | 64.64  | 9.19  |
| Q69ZP3-2 | Isoform 2 of Probable hydrolase PNKD OS=Mus musculus GN=Pnkd - [PNKD_MOUSE]                                 | 22.54 | 1 | 1  | 2  | 2  | 0.90 | 2.68 | 2.96 | 0.84 | 0.93 | 0.91 | 1.01 | 1.50 | 1.66 | 1.47 | 1.63 | 1.87 | 2.08 | 15.58  | 10.18 |
| Q3USH5   | Splicing factor, suppressor of white-apricot homolog OS=Mus musculus GN=Sfswap PE=1 SV=2 - [SFSWA_MOUSE]    | 8.36  | 1 | 4  | 4  | 12 | 0.91 | 1.06 | 1.06 | 1.01 | 1.03 | 1.20 | 1.29 | 1.50 | 1.39 | 1.03 | 1.12 | 1.16 | 1.13 | 104.13 | 8.05  |
| Q9ERR1-  | Isoform 2 of Nuclear distribution protein nudE-like 1 OS=Mus musculus GN=Ndel1 - [NDEL1_MOUSE]              | 65.71 | 2 | 14 | 19 | 66 | 1.02 | 1.02 | 0.98 | 0.96 | 0.93 | 1.38 | 1.29 | 1.50 | 1.43 | 1.29 | 1.20 | 1.27 | 1.24 | 35.49  | 5.22  |
| Q7TNS2   | Mitochondrial inner membrane organizing system protein 1 OS=Mus musculus GN=Minos1 PE=2 SV=1 - [MOS1_MOUSE] | 10.53 | 1 | 1  | 1  | 2  | 1.16 | 1.94 | 1.66 | 1.33 | 1.14 | 1.80 | 1.54 | 1.51 | 1.29 | 1.64 | 1.41 | 1.77 | 1.52 | 8.56   | 8.94  |

|          |                                                                                                           |       |    |   |    |     |      |      |      |      |      |      |      |      |      |      |      |      |      |        |       |
|----------|-----------------------------------------------------------------------------------------------------------|-------|----|---|----|-----|------|------|------|------|------|------|------|------|------|------|------|------|------|--------|-------|
| Q9CQ39   | Mediator of RNA polymerase II transcription subunit 21 OS=Mus musculus GN=Med21 PE=1 SV=1 - [MED21_MOUSE] | 22.22 | 1  | 2 | 2  | 5   | 1.20 | 1.22 | 0.90 | 1.04 | 1.00 | 1.24 | 1.09 | 1.51 | 1.25 | 1.30 | 1.09 | 1.33 | 1.01 | 15.58  | 4.53  |
| Q6NV92   | Protein Zip941 OS=Mus musculus GN=Zip941 PE=2 SV=1 - [Q6NV92_MOUSE]                                       | 2.38  | 2  | 1 | 1  | 3   | 1.17 | 1.06 | 0.91 | 0.82 | 0.70 | 1.32 | 1.12 | 1.51 | 1.29 | 1.31 | 1.12 | 0.97 | 0.83 | 75.90  | 9.32  |
| A2AEW0   | Transcription factor E3 OS=Mus musculus GN=Tte3 PE=2 SV=1 - [A2AEW0_MOUSE]                                | 13.59 | 19 | 7 | 7  | 10  | 1.07 | 0.96 | 1.00 | 0.98 | 0.93 | 1.22 | 1.12 | 1.51 | 1.40 | 1.13 | 1.24 | 1.17 | 1.06 | 57.70  | 6.37  |
| L7N209   | HBS1-like protein OS=Mus musculus GN=Hbs11 PE=4 SV=1 - [L7N209_MOUSE]                                     | 12.42 | 3  | 1 | 6  | 16  | 0.91 | 1.32 | 1.44 | 0.96 | 1.05 | 1.33 | 1.45 | 1.51 | 1.65 | 1.37 | 1.50 | 1.25 | 1.37 | 67.49  | 5.64  |
| D6RET6   | G patch domain-containing protein 1 OS=Mus musculus GN=Gpatch1 PE=2 SV=1 - [D6RET6_MOUSE]                 | 1.70  | 2  | 1 | 1  | 2   | 1.14 | 1.26 | 1.11 | 0.99 | 0.87 | 1.38 | 1.20 | 1.51 | 1.32 | 1.49 | 1.31 | 1.11 | 0.98 | 97.83  | 6.80  |
| Q9CW46   | Ribonucleoprotein PTB-binding 1 OS=Mus musculus GN=Raver1 PE=1 SV=2 - [RAVR1_MOUSE]                       | 4.41  | 1  | 2 | 2  | 11  | 1.02 | 1.05 | 1.08 | 0.94 | 0.97 | 1.33 | 1.37 | 1.52 | 1.35 | 1.36 | 1.41 | 1.50 | 1.47 | 79.33  | 8.72  |
| O70279   | Protein DGCR14 OS=Mus musculus GN=Dgcr14 PE=2 SV=2 - [DGC14_MOUSE]                                        | 11.90 | 2  | 3 | 3  | 7   | 1.13 | 1.18 | 1.15 | 1.14 | 1.01 | 1.46 | 1.51 | 1.52 | 1.37 | 1.26 | 1.12 | 1.14 | 1.01 | 52.57  | 6.70  |
| E9PZQ0   | Ryanodine receptor 1 OS=Mus musculus GN=Ryr1 PE=1 SV=1 - [RYR1_MOUSE]                                     | 0.48  | 2  | 1 | 2  | 2   | 1.23 | 1.19 | 0.97 | 0.95 | 0.77 | 1.46 | 1.18 | 1.52 | 1.23 | 1.29 | 1.05 | 1.27 | 1.03 | 564.68 | 5.27  |
| A2A7T3   | Arginine-glutamic acid dipeptide repeats protein OS=Mus musculus GN=Rere PE=2 SV=1 - [A2A7T3_MOUSE]       | 1.63  | 2  | 1 | 1  | 1   | 1.24 | 1.14 | 0.91 | 0.94 | 0.75 | 0.45 | 0.36 | 1.52 | 1.22 | 0.88 | 0.71 | 0.68 | 0.55 | 140.83 | 7.81  |
| Q61207   | Sulfated glycoprotein 1 OS=Mus musculus GN=Psap PE=1 SV=2 - [SAP_MOUSE]                                   | 47.76 | 3  | 1 | 22 | 209 | 1.19 | 1.05 | 0.88 | 1.03 | 0.87 | 1.18 | 0.99 | 1.52 | 1.28 | 1.33 | 1.12 | 1.43 | 1.20 | 61.38  | 5.19  |
| Q9CY57-1 | Isoform 5 of Chromatin target of PRMT1 protein OS=Mus musculus GN=Chtop - [CHTOP_MOUSE]                   | 25.99 | 8  | 3 | 3  | 8   | 1.08 | 1.11 | 0.89 | 1.06 | 1.03 | 1.53 | 1.37 | 1.52 | 1.46 | 1.49 | 1.43 | 1.29 | 1.33 | 19.23  | 12.00 |
| Q3ULB5   | Serine/threonine-protein kinase PAK 6 OS=Mus musculus GN=Pak6 PE=2 SV=1 - [PAK6_MOUSE]                    | 6.16  | 2  | 1 | 3  | 5   | 1.06 | 0.99 | 0.94 | 1.00 | 0.94 | 1.45 | 1.36 | 1.52 | 1.44 | 1.26 | 1.20 | 1.12 | 1.06 | 74.82  | 9.44  |

|          |                                                                                                       |       |   |   |   |    |      |      |      |      |      |      |      |      |      |      |      |      |      |        |      |
|----------|-------------------------------------------------------------------------------------------------------|-------|---|---|---|----|------|------|------|------|------|------|------|------|------|------|------|------|------|--------|------|
| Q8K2V6   | Importin-11 OS=Mus musculus GN=Ipo11 PE=1 SV=1 - [IPO11_MOUSE]                                        | 2.26  | 2 | 2 | 2 | 2  | 1.19 | 1.47 | 1.23 | 1.22 | 1.02 | 1.02 | 0.85 | 1.53 | 1.28 | 1.16 | 0.98 | 1.03 | 0.87 | 112.34 | 5.26 |
| Q9ERQ3   | Zinc finger protein 704 OS=Mus musculus GN=Znf704 PE=2 SV=1 - [ZN704_MOUSE]                           | 17.14 | 1 | 5 | 5 | 9  | 1.35 | 1.14 | 0.80 | 1.06 | 0.81 | 1.36 | 1.07 | 1.53 | 1.10 | 1.22 | 0.85 | 1.33 | 0.99 | 61.11  | 7.24 |
| Q61152   | Tyrosine-protein phosphatase non-receptor type 18 OS=Mus musculus GN=Ptpn18 PE=1 SV=1 - [PTN18_MOUSE] | 3.53  | 1 | 1 | 1 | 2  | 1.00 | 1.58 | 1.58 | 1.11 | 1.11 | 1.34 | 1.33 | 1.53 | 1.53 | 1.46 | 1.47 | 5.21 | 5.22 | 50.17  | 8.27 |
| Q91X84-2 | Isoform 2 of CREB-regulated transcription coactivator 3 OS=Mus musculus GN=Crtc3 - [CRTC3_MOUSE]      | 5.94  | 2 | 1 | 1 | 2  | 1.06 | 1.07 | 1.00 | 1.05 | 0.98 | 1.34 | 1.25 | 1.53 | 1.44 | 1.39 | 1.31 | 1.67 | 1.57 | 34.28  | 5.36 |
| Q9JJ48   | Zinc finger CCCH domain-containing protein 8 OS=Mus musculus GN=Zc3h8 PE=1 SV=2 - [ZC3H8_MOUSE]       | 5.25  | 1 | 1 | 1 | 1  | 0.98 | 1.20 | 1.22 | 0.94 | 0.96 | 1.21 | 1.22 | 1.54 | 1.56 | 1.07 | 1.09 | 1.31 | 1.34 | 34.89  | 9.01 |
| Q924C6   | Lysyl oxidase homolog 4 OS=Mus musculus GN=Loxl4 PE=2 SV=2 - [LOXL4_MOUSE]                            | 2.38  | 2 | 1 | 1 | 3  | 1.56 | 4.87 | 3.13 | 1.77 | 1.14 | 1.85 | 1.18 | 1.54 | 0.98 | 1.39 | 0.89 | 1.32 | 0.85 | 84.72  | 7.99 |
| O35738   | Krüppel-like factor 12 OS=Mus musculus GN=Klf12 PE=2 SV=2 - [KLF12_MOUSE]                             | 3.98  | 1 | 1 | 1 | 3  | 0.98 | 1.08 | 1.09 | 0.89 | 0.90 | 1.49 | 1.50 | 1.54 | 1.56 | 1.35 | 1.37 | 1.18 | 1.20 | 44.08  | 9.70 |
| Q543V3   | Insulin receptor substrate 1 OS=Mus musculus GN=Irs1 PE=2 SV=1 - [Q543V3_MOUSE]                       | 3.74  | 2 | 2 | 2 | 3  | 0.91 | 1.14 | 1.25 | 1.16 | 1.27 | 1.98 | 2.16 | 1.54 | 1.68 | 1.21 | 1.33 | 0.97 | 1.07 | 130.50 | 8.78 |
| M0QWS6   | Protein FAM193A (Fragment) OS=Mus musculus GN=Fam193a PE=4 SV=1 - [M0QWS6_MOUSE]                      | 10.45 | 3 | 1 | 1 | 15 | 1.27 | 1.36 | 1.07 | 1.07 | 0.92 | 1.30 | 1.11 | 1.54 | 1.11 | 1.44 | 1.11 | 1.33 | 1.01 | 15.33  | 9.57 |
| Q99L15   | Zinc finger protein 281 OS=Mus musculus GN=Znf281 PE=1 SV=1 - [ZN281_MOUSE]                           | 2.02  | 1 | 1 | 1 | 2  | 0.96 | 0.93 | 0.96 | 1.00 | 1.04 | 1.12 | 1.15 | 1.54 | 1.59 | 1.30 | 1.35 | 1.25 | 1.30 | 96.62  | 8.56 |
| Q68FG3   | Protein SPT2 homolog OS=Mus musculus GN=Spty2h1 PE=2 SV=1 - [SPT2_MOUSE]                              | 4.25  | 1 | 2 | 2 | 3  | 1.04 | 1.27 | 1.22 | 1.15 | 1.11 | 1.31 | 1.25 | 1.54 | 1.47 | 1.42 | 1.36 | 1.33 | 1.28 | 74.77  | 9.76 |
| O54786   | DNA fragmentation factor subunit alpha OS=Mus musculus GN=Dffa PE=1 SV=2 - [DFFA_MOUSE]               | 24.77 | 1 | 1 | 6 | 18 | 0.88 | 1.45 | 1.65 | 0.87 | 0.99 | 1.28 | 1.45 | 1.54 | 1.75 | 1.14 | 1.30 | 1.04 | 1.19 | 36.55  | 4.91 |

|          |                                                                                                                   |       |   |   |   |    |      |      |      |      |      |      |      |      |      |      |      |      |      |        |       |       |
|----------|-------------------------------------------------------------------------------------------------------------------|-------|---|---|---|----|------|------|------|------|------|------|------|------|------|------|------|------|------|--------|-------|-------|
| E9PUY1   | 28S ribosomal protein S12, mitochondrial (Fragment) OS=Mus musculus GN=Mrps12 PE=2 SV=1 - [E9PUY1_MOUSE]          | 6.40  | 2 | 1 | 1 | 1  | 1    | 0.89 | 1.35 | 1.52 | 1.75 | 1.97 | 2.53 | 2.84 | 1.54 | 1.73 | 1.28 | 1.44 | 2.14 | 2.41   | 13.87 | 10.43 |
| Q9CV12-2 | Isoform 2 of Protein FAM133B OS=Mus musculus GN=Fam133b - [F133B_MOUSE]                                           | 9.57  | 2 | 1 | 1 | 3  | 0.97 | 1.11 | 1.14 | 1.01 | 1.04 | 1.00 | 1.02 | 1.54 | 1.59 | 1.29 | 1.33 | 1.19 | 1.23 | 13.48  | 10.13 |       |
| D6REH7   | Protein I110004E09Rik OS=Mus musculus GN=I110004E09Rik PE=2 SV=1 - [D6REH7_MOUSE]                                 | 17.93 | 3 | 1 | 1 | 1  | 1.25 | 0.59 | 0.47 | 0.99 | 0.79 | 1.71 | 1.36 | 1.55 | 1.23 | 0.73 | 0.58 | 1.04 | 0.83 | 16.11  | 5.77  |       |
| E9Q3B5   | Uncharacterized protein OS=Mus musculus GN=Gm10774 PE=3 SV=1 - [E9Q3B5_MOUSE]                                     | 29.85 | 2 | 2 | 2 | 3  | 0.89 | 0.72 | 0.80 | 0.78 | 0.87 | 1.71 | 1.90 | 1.55 | 1.73 | 1.15 | 1.29 | 1.14 | 1.28 | 7.64   | 8.48  |       |
| Q3UXS0   | Secretory carrier-associated membrane protein 3 OS=Mus musculus GN=Scamp3 PE=2 SV=1 - [Q3UXS0_MOUSE]              | 18.57 | 1 | 1 | 3 | 14 | 1.35 | 1.31 | 0.63 | 1.23 | 0.91 | 0.96 | 0.72 | 1.55 | 1.15 | 1.14 | 0.85 | 1.63 | 1.21 | 38.56  | 7.64  |       |
| Q9EST5   | Acidic leucine-rich nuclear phosphoprotein 32 family member B OS=Mus musculus GN=Anp32b PE=1 SV=1 - [AN32B_MOUSE] | 18.38 | 3 | 2 | 5 | 30 | 1.15 | 1.01 | 1.11 | 1.19 | 1.03 | 1.61 | 1.39 | 1.56 | 1.34 | 1.26 | 1.09 | 1.80 | 1.57 | 31.06  | 4.01  |       |
| Q9D6V8   | Polyadenylate-binding protein-interacting protein 2 OS=Mus musculus GN=Paip2 PE=2 SV=1 - [PAIP2_MOUSE]            | 26.61 | 1 | 2 | 2 | 9  | 1.37 | 1.52 | 1.13 | 0.95 | 0.84 | 1.44 | 1.01 | 1.56 | 1.20 | 1.28 | 0.99 | 1.58 | 1.14 | 14.69  | 4.12  |       |
| G3UW60   | MCG14773 OS=Mus musculus GN=Susd5 PE=4 SV=1 - [G3UW60_MOUSE]                                                      | 4.85  | 1 | 3 | 3 | 6  | 0.79 | 0.79 | 1.00 | 1.10 | 1.25 | 1.17 | 1.07 | 1.56 | 1.14 | 1.09 | 1.12 | 0.85 | 0.85 | 66.76  | 4.93  |       |
| Q7M722   | Taste receptor type 2 member 114 OS=Mus musculus GN=Tas2r114 PE=2 SV=1 - [TR114_MOUSE]                            | 3.56  | 1 | 1 | 1 | 1  | 0.83 | 1.39 | 1.66 | 0.92 | 1.10 | 1.22 | 1.46 | 1.56 | 1.87 | 1.19 | 1.43 | 1.42 | 1.71 | 35.71  | 9.04  |       |
| Q9DD24   | WW domain-binding protein 5 OS=Mus musculus GN=Wbp5 PE=2 SV=1 - [WBP5_MOUSE]                                      | 8.65  | 1 | 1 | 1 | 7  | 1.19 | 1.33 | 1.04 | 1.16 | 0.97 | 1.56 | 1.21 | 1.56 | 1.28 | 1.40 | 1.15 | 1.30 | 1.11 | 12.66  | 4.84  |       |
| O88492   | Perilipin-4 OS=Mus musculus GN=Plin4 PE=1 SV=2 - [PLIN4_MOUSE]                                                    | 6.27  | 2 | 2 | 2 | 3  | 1.05 | 0.91 | 0.86 | 0.96 | 0.91 | 1.82 | 1.73 | 1.56 | 1.48 | 1.43 | 1.37 | 1.38 | 1.32 | 139.33 | 8.59  |       |

|          |                                                                                                                  |       |   |    |    |     |      |      |      |      |      |      |      |      |      |      |      |      |      |        |      |
|----------|------------------------------------------------------------------------------------------------------------------|-------|---|----|----|-----|------|------|------|------|------|------|------|------|------|------|------|------|------|--------|------|
| Q99K90   | TGF-beta-activated kinase 1 and MAP3K7-binding protein 2 OS=Mus musculus GN=Tab2 PE=1 SV=1 - [TAB2_MOUSE]        | 5.63  | 3 | 3  | 3  | 5   | 1.07 | 1.07 | 1.14 | 1.01 | 0.96 | 1.49 | 1.34 | 1.57 | 1.46 | 1.44 | 1.34 | 1.67 | 1.57 | 76.39  | 8.59 |
| Q01149   | Collagen alpha-2(I) chain OS=Mus musculus GN=Col1a2 PE=2 SV=2 - [CO1A2_MOUSE]                                    | 4.52  | 1 | 5  | 5  | 11  | 1.10 | 1.06 | 0.93 | 1.00 | 0.93 | 3.37 | 2.83 | 1.57 | 1.31 | 1.65 | 1.46 | 1.15 | 1.00 | 129.48 | 9.19 |
| Q7M6Y6   | Maestro heat-like repeat-containing protein family member 2B OS=Mus musculus GN=Mroh2b PE=1 SV=2 - [MRO2B_MOUSE] | 0.76  | 1 | 1  | 1  | 1   | 0.70 | 1.03 | 1.48 | 0.89 | 1.27 | 1.61 | 2.30 | 1.57 | 2.25 | 1.12 | 1.61 | 0.80 | 1.15 | 180.36 | 6.61 |
| E0CYD7   | Putative E3 ubiquitin-protein ligase UNKL OS=Mus musculus GN=Unkl PE=2 SV=1 - [E0CYD7_MOUSE]                     | 6.47  | 3 | 1  | 2  | 8   | 0.97 | 0.92 | 0.95 | 0.92 | 0.95 | 1.46 | 1.50 | 1.57 | 1.61 | 1.37 | 1.42 | 1.14 | 1.18 | 58.50  | 7.78 |
| P35455   | Vasopressin-neurophysin 2-copeptin OS=Mus musculus GN=Avp PE=2 SV=1 - [NEU2_MOUSE]                               | 4.76  | 1 | 1  | 1  | 2   | 9.62 | 2.16 | 0.22 | 1.60 | 0.17 | 2.17 | 0.22 | 1.57 | 0.16 | 5.96 | 0.62 | 3.58 | 0.37 | 17.89  | 7.58 |
| Q4VA61   | Down syndrome cell adhesion molecule-like protein 1 homolog OS=Mus musculus GN=Dscaml1 PE=1 SV=2 - [DSC1_MOUSE]  | 0.44  | 2 | 1  | 1  | 2   | 0.97 | 1.19 | 1.22 | 0.87 | 0.89 | 0.92 | 0.94 | 1.57 | 1.61 | 1.44 | 1.48 | 1.57 | 1.62 | 224.10 | 8.16 |
| P15331-3 | Isoform 5b of Peripherin OS=Mus musculus GN=Prph - [PER1_MOUSE]                                                  | 8.46  | 5 | 1  | 4  | 13  | 1.22 | 1.22 | 1.00 | 1.37 | 1.12 | 1.45 | 1.18 | 1.57 | 1.28 | 1.38 | 1.13 | 1.35 | 1.11 | 52.65  | 5.45 |
| Q8CI40   | Rootletin OS=Mus musculus GN=Crocc PE=1 SV=2 - [CROCC_MOUSE]                                                     | 31.31 | 4 | 52 | 53 | 119 | 1.04 | 1.10 | 1.05 | 0.99 | 0.95 | 1.53 | 1.45 | 1.57 | 1.49 | 1.46 | 1.41 | 1.47 | 1.43 | 226.81 | 5.55 |
| Q9QYR9   | Acyl-coenzyme A thioesterase 2, mitochondrial OS=Mus musculus GN=Acot2 PE=1 SV=2 - [ACOT2_MOUSE]                 | 16.11 | 1 | 2  | 5  | 12  | 1.26 | 1.34 | 1.06 | 1.17 | 0.92 | 0.97 | 0.77 | 1.58 | 1.25 | 1.23 | 0.97 | 1.52 | 1.21 | 49.63  | 7.36 |
| E9PWX7   | TBC1 domain family member 25 OS=Mus musculus GN=Tbc1d25 PE=2 SV=1 - [E9PWX7_MOUSE]                               | 0.83  | 2 | 1  | 1  | 1   | 1.26 | 0.71 | 0.56 | 0.81 | 0.64 | 1.54 | 1.22 | 1.58 | 1.25 | 1.34 | 1.06 | 1.22 | 0.96 | 80.21  | 6.37 |
| Q9D3P8   | Plasminogen receptor (KT) OS=Mus musculus GN=Plgrkt PE=1 SV=1 - [PLRKT_MOUSE]                                    | 7.48  | 1 | 1  | 1  | 1   | 1.33 | 0.86 | 0.64 | 1.44 | 1.08 | 1.56 | 1.16 | 1.59 | 1.19 | 1.66 | 1.25 | 1.63 | 1.23 | 17.25  | 9.50 |
| F6W8W7   | Protein Taf4a (Fragment) OS=Mus musculus GN=Taf4a PE=4 SV=1 - [F6W8W7_MOUSE]                                     | 1.76  | 2 | 1  | 1  | 1   | 0.89 | 1.09 | 1.21 | 0.80 | 0.89 | 1.12 | 1.25 | 1.60 | 1.78 | 1.14 | 1.27 | 1.16 | 1.30 | 73.20  | 9.94 |

|          |                                                                                                                           |       |   |   |    |     |      |      |      |      |      |      |      |      |      |      |      |      |      |        |       |
|----------|---------------------------------------------------------------------------------------------------------------------------|-------|---|---|----|-----|------|------|------|------|------|------|------|------|------|------|------|------|------|--------|-------|
| O08576-2 | Isoform 2 of RUN domain-containing protein 3A OS=Mus musculus GN=Rundc3a - [RUN3A_MOUSE]                                  | 21.75 | 3 | 1 | 5  | 7   | 0.90 | 1.59 | 1.75 | 1.11 | 1.23 | 1.19 | 1.31 | 1.60 | 1.76 | 1.29 | 1.43 | 1.41 | 1.56 | 45.51  | 5.48  |
| Q9CPV3   | 39S ribosomal protein L42, mitochondrial OS=Mus musculus GN=Mrlp42 PE=2 SV=1 - [RM42_MOUSE]                               | 9.15  | 1 | 1 | 1  | 2   | 0.92 | 0.69 | 0.75 | 0.90 | 0.98 | 1.47 | 1.60 | 1.60 | 1.74 | 1.33 | 1.45 | 1.08 | 1.18 | 16.48  | 9.19  |
| Q61495   | Desmoglein-1-alpha OS=Mus musculus GN=Dsg1a PE=2 SV=2 - [DSG1A_MOUSE]                                                     | 1.23  | 2 | 1 | 1  | 2   | 2.04 | 0.81 | 0.39 | 6.68 | 3.27 | 1.24 | 0.60 | 1.60 | 0.78 | 1.08 | 0.53 | 2.21 | 1.09 | 114.52 | 4.89  |
| A2AR95-  | Isoform 3 of Low-density lipoprotein receptor class A domain-containing protein 3 OS=Mus musculus GN=Llrad3 [LRAD3_MOUSE] | 3.51  | 2 | 1 | 1  | 1   | 1.03 | 0.93 | 0.90 | 0.54 | 0.53 | 1.40 | 1.36 | 1.61 | 1.55 | 1.12 | 1.09 | 1.04 | 1.02 | 33.91  | 5.03  |
| Q6PIX5   | Inactive rhomboid protein 1 OS=Mus musculus GN=Rhbdf1 PE=1 SV=2 - [RHDF1_MOUSE]                                           | 4.09  | 5 | 2 | 2  | 4   | 1.02 | 1.39 | 1.36 | 1.09 | 1.06 | 1.30 | 1.26 | 1.61 | 1.57 | 1.35 | 1.32 | 1.30 | 1.27 | 97.23  | 8.59  |
| P63078   | Guanine nucleotide-binding protein G(i)(G(s))G(o) subunit gamma-8 OS=Mus musculus GN=Gng8 PE=2 SV=1 - [GBG8_MOUSE]        | 22.86 | 1 | 1 | 1  | 2   | 1.49 | 1.30 | 0.87 | 1.01 | 0.68 | 1.43 | 0.95 | 1.61 | 1.08 | 1.65 | 1.11 | 3.05 | 2.05 | 7.84   | 7.14  |
| Q9QZS0   | Collagen alpha-3(IV) chain OS=Mus musculus GN=Col4a3 PE=1 SV=2 - [CO4A3_MOUSE]                                            | 0.66  | 1 | 1 | 1  | 1   | 0.91 | 1.13 | 1.24 | 0.97 | 1.07 | 1.43 | 1.56 | 1.61 | 1.77 | 1.93 | 2.12 | 1.18 | 1.30 | 161.62 | 9.48  |
| Q5RL20   | 39S ribosomal protein L43, mitochondrial OS=Mus musculus GN=Mrlp43 PE=2 SV=1 - [Q5RL20_MOUSE]                             | 6.92  | 2 | 1 | 1  | 2   | 1.03 | 1.21 | 1.17 | 1.22 | 1.18 | 1.57 | 1.51 | 1.62 | 1.56 | 1.57 | 1.53 | 1.37 | 1.33 | 17.87  | 10.58 |
| Q9R0A0   | Peroxisomal membrane protein PEX14 OS=Mus musculus GN=Pex14 PE=1 SV=1 - [PEX14_MOUSE]                                     | 17.55 | 2 | 5 | 5  | 21  | 1.06 | 1.22 | 1.26 | 1.08 | 1.11 | 1.68 | 1.58 | 1.62 | 1.70 | 1.63 | 1.62 | 1.48 | 1.41 | 41.18  | 5.11  |
| H3BL28   | Protein Ppp1r9a (Fragment) OS=Mus musculus GN=Ppp1r9a PE=2 SV=1 - [H3BL28_MOUSE]                                          | 48.46 | 8 | 1 | 40 | 216 | 1.23 | 0.88 | 0.71 | 1.02 | 0.83 | 1.21 | 0.98 | 1.62 | 1.31 | 1.29 | 1.05 | 1.19 | 0.97 | 116.41 | 4.96  |
| Q61550   | Double-strand-break repair protein rad21 homolog OS=Mus musculus GN=Rad21 PE=1 SV=3 - [RAD21_MOUSE]                       | 2.05  | 1 | 1 | 1  | 3   | 1.12 | 1.13 | 1.01 | 1.33 | 1.19 | 1.50 | 1.34 | 1.62 | 1.45 | 1.70 | 1.52 | 1.24 | 1.11 | 72.04  | 4.64  |



|          |                                                                                                            |       |    |   |    |     |      |      |      |      |      |      |      |      |      |      |      |      |      |        |      |
|----------|------------------------------------------------------------------------------------------------------------|-------|----|---|----|-----|------|------|------|------|------|------|------|------|------|------|------|------|------|--------|------|
| D3Z607   | Non-histone chromosomal protein HMG-14 OS=Mus musculus GN=Hmg1 PE=2 SV=1 - [D3Z607_MOUSE]                  | 47.67 | 2  | 3 | 3  | 100 | 1.07 | 1.13 | 0.90 | 0.91 | 0.81 | 1.25 | 0.81 | 1.63 | 1.13 | 1.51 | 0.95 | 1.65 | 1.09 | 9.02   | 9.31 |
| A6H611   | Mitochondrial intermediate peptidase OS=Mus musculus GN=Mipep PE=2 SV=1 - [MPEP_MOUSE]                     | 0.98  | 1  | 1 | 1  | 1   | 1.50 | 1.70 | 1.13 | 1.29 | 0.86 | 0.92 | 0.61 | 1.64 | 1.09 | 1.59 | 1.06 | 1.07 | 0.72 | 80.80  | 7.15 |
| P02535-3 | Isoform 3 of Keratin, type 1 cytoskeletal 10 OS=Mus musculus GN=Krt10 - [K1C10_MOUSE]                      | 10.82 | 11 | 3 | 5  | 9   | 1.61 | 1.53 | 0.88 | 1.66 | 1.11 | 1.35 | 0.83 | 1.64 | 1.00 | 1.36 | 0.83 | 2.04 | 1.17 | 49.47  | 5.02 |
| F8WGI9   | Very low-density lipoprotein receptor OS=Mus musculus GN=Vldlr PE=2 SV=1 [F8WGI9_MOUSE]                    | 3.36  | 4  | 2 | 2  | 5   | 1.07 | 1.26 | 1.17 | 1.20 | 1.13 | 1.02 | 0.99 | 1.64 | 1.52 | 1.36 | 1.51 | 1.46 | 1.63 | 88.95  | 4.84 |
| Q6DFY8   | Protein FAM5B OS=Mus musculus GN=Fam5b PE=2 SV=1 - [FAM5B_MOUSE]                                           | 5.36  | 1  | 3 | 3  | 4   | 1.04 | 1.23 | 1.18 | 1.07 | 1.03 | 1.06 | 0.85 | 1.64 | 0.75 | 1.14 | 0.92 | 1.11 | 1.07 | 89.17  | 7.88 |
| E9PZ30   | Protein Ugt2b34 OS=Mus musculus GN=Ugt2b34 PE=2 SV=1 - [E9PZ30_MOUSE]                                      | 11.14 | 2  | 2 | 2  | 2   | 0.71 | 0.50 | 0.58 | 0.66 | 0.94 | 1.29 | 1.81 | 1.65 | 2.33 | 1.63 | 1.89 | 0.68 | 0.97 | 50.11  | 6.11 |
| Q61033   | Lamina-associated polypeptide 2, isoforms alpha/zeta OS=Mus musculus GN=Tmpo PE=1 SV=4 - [LAP2A_MOUSE]     | 21.50 | 2  | 2 | 11 | 35  | 1.00 | 1.22 | 1.22 | 1.09 | 1.09 | 1.15 | 1.15 | 1.65 | 1.65 | 1.26 | 1.27 | 1.21 | 1.22 | 75.12  | 8.05 |
| Q5M6W3   | Clathrin heavy chain linker domain-containing protein 1 OS=Mus musculus GN=Clhc1 PE=2 SV=1 - [CLHC1_MOUSE] | 3.69  | 1  | 1 | 1  | 1   | 1.96 | 0.78 | 0.40 | 1.26 | 0.64 | 0.52 | 0.26 | 1.66 | 0.84 | 1.13 | 0.58 | 1.31 | 0.67 | 69.37  | 8.25 |
| Q9WVF8   | Tumor suppressor candidate 2 OS=Mus musculus GN=Tusc2 PE=1 SV=3 - [TUSC2_MOUSE]                            | 50.00 | 1  | 4 | 4  | 9   | 1.04 | 1.01 | 0.93 | 0.96 | 0.89 | 1.55 | 1.47 | 1.66 | 1.85 | 1.50 | 1.32 | 1.33 | 1.44 | 12.13  | 9.69 |
| Q9CY34   | NEDD8-conjugating enzyme UBE2F OS=Mus musculus GN=Ube2f PE=1 SV=1 - [UB2FA_MOUSE]                          | 11.35 | 2  | 2 | 2  | 3   | 1.18 | 0.99 | 0.84 | 1.01 | 0.86 | 1.36 | 1.15 | 1.67 | 1.41 | 1.47 | 1.25 | 1.44 | 1.23 | 21.10  | 6.54 |
| Q6PDM1   | Isoform 4 of Male-specific lethal 1 homolog OS=Mus musculus GN=Msl1 - [MSL1_MOUSE]                         | 7.56  | 10 | 2 | 3  | 5   | 1.49 | 0.99 | 0.66 | 1.08 | 0.68 | 0.91 | 0.72 | 1.68 | 1.38 | 1.54 | 1.27 | 1.14 | 0.94 | 49.18  | 8.94 |
| Q8BLR5   | PH and SEC7 domain-containing protein 4 OS=Mus musculus GN=Psd4 PE=2 SV=1 - [PSD4_MOUSE]                   | 1.49  | 1  | 1 | 1  | 1   | 1.17 | 1.13 | 0.97 | 1.34 | 1.14 | 3.41 | 2.91 | 1.68 | 1.43 | 1.88 | 1.61 | 1.20 | 1.03 | 112.66 | 5.24 |

|          |                                                                                                            |       |   |   |   |   |      |      |      |      |      |      |      |      |      |      |      |      |      |       |       |
|----------|------------------------------------------------------------------------------------------------------------|-------|---|---|---|---|------|------|------|------|------|------|------|------|------|------|------|------|------|-------|-------|
| G5E8M8   | Ligand-dependent nuclear receptor-interacting factor 1 OS=Mus musculus GN=Lrif1 PE=4 SV=1 - [G5E8M8_MOUSE] | 12.24 | 3 | 2 | 2 | 3 | 0.95 | 0.78 | 0.82 | 0.98 | 1.03 | 1.20 | 1.26 | 1.68 | 1.76 | 1.51 | 1.59 | 1.05 | 1.10 | 27.03 | 9.39  |
| A2AEE4   | Proline/serine-rich coiled-coil protein 1 (Fragment) OS=Mus musculus GN=Psre1 PE=2 SV=1 - [A2AEE4_MOUSE]   | 9.62  | 2 | 1 | 1 | 3 | 1.07 | 1.34 | 1.25 | 1.13 | 1.06 | 1.34 | 1.25 | 1.69 | 1.57 | 1.33 | 1.24 | 1.44 | 1.35 | 27.55 | 10.67 |
| Q8BUM6   | Protein FAM163B OS=Mus musculus GN=Fam163b PE=1 SV=1 - [F163B_MOUSE]                                       | 14.37 | 1 | 1 | 1 | 2 | 1.03 | 1.12 | 1.09 | 1.02 | 0.98 | 1.68 | 1.62 | 1.70 | 1.64 | 1.51 | 1.47 | 1.08 | 1.05 | 18.29 | 5.15  |
| B1AYB7   | Methyl-CpG-binding domain protein 5 OS=Mus musculus GN=Mbd5 PE=2 SV=1 - [B1AYB7_MOUSE]                     | 4.21  | 4 | 1 | 1 | 1 | 1.34 | 1.53 | 1.13 | 0.94 | 0.70 | 1.30 | 0.96 | 1.73 | 1.29 | 0.63 | 0.47 | 1.04 | 0.77 | 90.01 | 9.54  |
| Q8CSR2   | Proline and serine-rich protein 2 OS=Mus musculus GN=Proser2 PE=1 SV=3 - [PRSR2_MOUSE]                     | 3.40  | 1 | 1 | 1 | 2 | 1.09 | 1.10 | 1.00 | 0.97 | 0.89 | 1.46 | 1.33 | 1.75 | 1.59 | 1.46 | 1.34 | 1.08 | 0.98 | 50.39 | 6.30  |
| G3UZ12   | Protein Jumonji OS=Mus musculus GN=Jarid2 PE=2 SV=1 - [G3UZ12_MOUSE]                                       | 18.18 | 2 | 1 | 1 | 1 | 1.00 | 1.01 | 1.01 | 0.93 | 0.93 | 1.67 | 1.66 | 1.75 | 1.74 | 1.64 | 1.64 | 1.53 | 1.53 | 4.76  | 8.02  |
| Q8BZR9   | Uncharacterized protein C17orf85 homolog OS=Mus musculus PE=1 SV=1 - [CQ085_MOUSE]                         | 5.20  | 3 | 2 | 2 | 5 | 1.11 | 1.31 | 1.18 | 1.34 | 1.21 | 2.14 | 1.92 | 1.75 | 1.57 | 1.54 | 1.39 | 1.24 | 1.12 | 70.00 | 5.80  |
| M0QWU0   | CXXC-type zinc finger protein 4 OS=Mus musculus GN=Cxxc4 PE=4 SV=1 - [M0QWU0_MOUSE]                        | 16.12 | 1 | 2 | 2 | 3 | 0.99 | 1.05 | 1.07 | 1.04 | 1.05 | 1.29 | 1.30 | 1.75 | 1.77 | 1.63 | 1.65 | 1.46 | 1.48 | 36.42 | 9.07  |
| Q8BGT0   | Osteopetrosis-associated transmembrane protein 1 OS=Mus musculus GN=Ostm1 PE=1 SV=1 - [OSTM1_MOUSE]        | 4.44  | 1 | 1 | 1 | 2 | 0.95 | 1.11 | 1.18 | 1.16 | 1.22 | 1.70 | 1.79 | 1.76 | 1.85 | 1.75 | 1.85 | 1.95 | 2.06 | 37.98 | 6.39  |
| P23949   | Zinc finger protein 36, C3H1 type-like 2 OS=Mus musculus GN=Zip36l2 PE=2 SV=1 - [TISD_MOUSE]               | 5.45  | 2 | 1 | 1 | 1 | 1.22 | 0.99 | 0.81 | 1.29 | 1.06 | 1.62 | 1.32 | 1.80 | 1.47 | 1.31 | 1.07 | 1.26 | 1.03 | 37.57 | 8.68  |
| Q80T23-2 | Isoform 2 of Synaptotagmin-like protein 5 OS=Mus musculus GN=Syt15 - [SYTL5_MOUSE]                         | 2.05  | 2 | 1 | 1 | 2 | 1.53 | 1.66 | 1.08 | 1.40 | 0.91 | 1.48 | 0.96 | 1.80 | 1.17 | 2.12 | 1.38 | 2.09 | 1.37 | 81.66 | 8.78  |

|         |                                                                                                                                   |       |   |   |    |     |      |       |      |      |      |      |      |      |      |      |      |      |      |       |       |
|---------|-----------------------------------------------------------------------------------------------------------------------------------|-------|---|---|----|-----|------|-------|------|------|------|------|------|------|------|------|------|------|------|-------|-------|
| Q03719  | Potassium voltage-gated channel subfamily D member 1<br>OS=Mus musculus<br>GN=Kcnd1 PE=1<br>SV=1 -<br>[KCND1_MOUSE]               | 3.53  | 1 | 1 | 1  | 1   | 2.77 | 15.50 | 5.59 | 3.17 | 1.14 | 3.48 | 1.25 | 1.80 | 0.65 | 2.37 | 0.86 | 2.16 | 0.78 | 71.65 | 8.21  |
| Q8VE92  | RNA-binding protein 4B<br>OS=Mus musculus<br>GN=Rbm4b PE=1<br>SV=1 -<br>[RBM4B_MOUSE]                                             | 31.65 | 4 | 1 | 10 | 20  | 1.01 | 1.01  | 1.00 | 1.00 | 0.99 | 1.52 | 1.50 | 1.81 | 1.78 | 1.42 | 1.40 | 1.54 | 1.53 | 39.97 | 6.74  |
| Q0PHV7  | Dapper homolog 3<br>OS=Mus musculus<br>GN=Dact3 PE=1<br>SV=1 -<br>[DACT3_MOUSE]                                                   | 4.75  | 1 | 2 | 2  | 4   | 1.05 | 1.09  | 1.04 | 0.94 | 0.89 | 1.13 | 1.07 | 1.81 | 1.72 | 1.42 | 1.35 | 1.65 | 1.57 | 63.25 | 10.42 |
| Q5SRX1- | Isoform 2 of TOM1-like protein 2<br>OS=Mus musculus<br>GN=Tom1l2<br>[TM1L2_MOUSE]                                                 | 46.82 | 6 | 1 | 18 | 142 | 0.86 | 0.82  | 0.95 | 1.05 | 1.22 | 1.15 | 1.33 | 1.81 | 2.11 | 1.53 | 1.78 | 1.25 | 1.46 | 53.35 | 4.87  |
| Q99ML1  | Bcl-2-binding component 3<br>OS=Mus musculus<br>GN=Bbc3 PE=1<br>SV=1 -<br>[BBC3_MOUSE]                                            | 4.15  | 1 | 1 | 1  | 3   | 1.12 | 1.22  | 1.09 | 0.97 | 0.87 | 1.64 | 1.46 | 1.82 | 1.62 | 1.82 | 1.63 | 1.66 | 1.49 | 20.74 | 7.42  |
| E9Q3H6  | Protein Coq10a<br>OS=Mus musculus<br>GN=Coq10a PE=2<br>SV=1 -<br>[E9Q3H6_MOUSE]                                                   | 3.86  | 1 | 1 | 1  | 1   | 1.55 | 1.88  | 1.21 | 2.13 | 1.37 | 2.52 | 1.61 | 1.83 | 1.17 | 2.21 | 1.42 | 1.41 | 0.91 | 28.91 | 9.82  |
| Q9CR37  | Pancreatic progenitor cell differentiation and proliferation factor<br>OS=Mus musculus<br>GN=Pdpf PE=2<br>SV=1 -<br>[PPDPF_MOUSE] | 13.04 | 1 | 1 | 1  | 1   | 1.21 | 0.71  | 0.59 | 1.18 | 0.97 | 0.98 | 0.81 | 1.87 | 1.54 | 1.93 | 1.60 | 1.41 | 1.17 | 12.25 | 7.44  |
| Q99M46  | DNA-directed RNA polymerase II subunit RPB3<br>OS=Mus musculus<br>GN=Polr2c PE=2<br>SV=1 -<br>[Q99M46_MOUSE]                      | 13.82 | 2 | 2 | 2  | 2   | 1.24 | 1.73  | 1.39 | 1.19 | 0.96 | 1.56 | 1.25 | 1.87 | 1.51 | 1.70 | 1.37 | 1.94 | 1.57 | 31.42 | 4.92  |
| P97304  | DNA-directed RNA polymerases I and III subunit RPAC2<br>OS=Mus musculus<br>GN=Polr1d PE=2<br>SV=1 -<br>[RPAC2_MOUSE]              | 21.80 | 1 | 2 | 2  | 3   | 1.02 | 0.86  | 0.84 | 0.97 | 0.95 | 1.76 | 1.70 | 1.88 | 1.83 | 1.52 | 1.49 | 1.49 | 1.46 | 15.06 | 6.90  |
| D3Z723  | Nuclear transcription factor Y subunit beta (Fragment)<br>OS=Mus musculus<br>GN=Nfyb PE=2<br>SV=1 -<br>[D3Z723_MOUSE]             | 12.26 | 2 | 1 | 1  | 2   | 1.06 | 1.46  | 1.38 | 1.10 | 1.04 | 1.70 | 1.60 | 1.91 | 1.81 | 1.66 | 1.58 | 1.49 | 1.41 | 11.67 | 4.58  |
| Q8BW74  | Hepatic leukemia factor<br>OS=Mus musculus<br>GN=Hlf PE=2<br>SV=1 -<br>[HLF_MOUSE]                                                | 5.76  | 1 | 1 | 1  | 2   | 0.65 | 0.90  | 1.37 | 0.71 | 1.09 | 1.62 | 2.48 | 1.92 | 2.94 | 1.60 | 2.46 | 1.24 | 1.91 | 33.13 | 8.32  |
| Q60960  | Importin subunit alpha-5<br>OS=Mus musculus<br>GN=Kpna1 PE=1<br>SV=2 -<br>[IMA5_MOUSE]                                            | 10.78 | 4 | 1 | 4  | 7   | 0.99 | 1.66  | 1.67 | 1.31 | 1.32 | 1.02 | 1.02 | 1.94 | 1.94 | 1.29 | 1.31 | 1.82 | 1.83 | 60.14 | 5.01  |

|        |                                                                                                       |       |   |   |   |   |      |       |      |      |      |      |      |      |      |      |      |      |      |        |      |
|--------|-------------------------------------------------------------------------------------------------------|-------|---|---|---|---|------|-------|------|------|------|------|------|------|------|------|------|------|------|--------|------|
| P07309 | Transthyretin OS=Mus musculus GN=Tr PE=1 SV=1 - [TTHY_MOUSE]                                          | 15.65 | 1 | 2 | 2 | 3 | 1.74 | 1.81  | 1.04 | 1.93 | 1.11 | 2.59 | 1.48 | 2.00 | 1.15 | 2.77 | 1.60 | 2.38 | 1.37 | 15.77  | 6.16 |
| A2AJ76 | Hemicentin-2 OS=Mus musculus GN=Hmcn2 PE=1 SV=1 - [HMCN2_MOUSE]                                       | 0.31  | 1 | 1 | 1 | 2 | 1.39 | 1.27  | 0.91 | 1.77 | 1.27 | 2.76 | 1.97 | 2.00 | 1.43 | 3.62 | 2.60 | 2.79 | 2.01 | 546.85 | 5.71 |
| Q8K136 | Sodium channel modifier 1 OS=Mus musculus GN=Scnm1 PE=1 SV=1 - [SCNM1_MOUSE]                          | 11.79 | 2 | 2 | 2 | 2 | 1.83 | 1.03  | 0.56 | 4.08 | 2.23 | 1.45 | 0.79 | 2.03 | 1.10 | 1.38 | 0.76 | 2.11 | 1.16 | 25.81  | 8.66 |
| Q8BP48 | Methionine aminopeptidase 1 OS=Mus musculus GN=Metap1 PE=2 SV=1 - [MAP11_MOUSE]                       | 3.37  | 1 | 1 | 1 | 1 | 1.00 | 1.02  | 1.02 | 1.13 | 1.13 | 1.35 | 1.34 | 2.04 | 2.04 | 1.93 | 1.93 | 1.84 | 1.84 | 43.19  | 7.17 |
| E0CZF0 | Uncharacterized protein OS=Mus musculus GN=Smdt1 PE=2 SV=1 - [E0CZF0_MOUSE]                           | 29.58 | 2 | 1 | 1 | 3 | 1.45 | 1.16  | 0.80 | 1.38 | 0.95 | 1.44 | 0.99 | 2.04 | 1.40 | 1.64 | 1.13 | 1.66 | 1.14 | 8.14   | 4.61 |
| Q9DBK0 | Acyl-coenzyme A thioesterase 12 OS=Mus musculus GN=Acot12 PE=2 SV=1 - [ACO12_MOUSE]                   | 1.80  | 1 | 1 | 1 | 1 | 3.10 | 30.26 | 9.73 | 4.28 | 1.38 | 4.54 | 1.45 | 2.06 | 0.66 | 1.88 | 0.61 | 1.38 | 0.44 | 61.72  | 7.18 |
| Q8BHE4 | Transmembrane protein 108 OS=Mus musculus GN=Tmem108 PE=2 SV=1 - [TM108_MOUSE]                        | 2.79  | 1 | 1 | 1 | 2 | 1.88 | 1.61  | 0.86 | 1.19 | 0.63 | 2.27 | 1.20 | 2.08 | 1.11 | 1.54 | 0.82 | 1.33 | 0.71 | 59.61  | 8.44 |
| D3YW07 | Neuroglobin OS=Mus musculus GN=Ngb PE=2 SV=1 - [D3YW07_MOUSE]                                         | 20.65 | 3 | 1 | 1 | 2 | 2.24 | 1.48  | 0.66 | 1.56 | 0.70 | 1.13 | 0.50 | 2.12 | 0.94 | 2.06 | 0.92 | 1.87 | 0.84 | 10.38  | 6.76 |
| E0CZ73 | Occludin OS=Mus musculus GN=Ocln PE=2 SV=1 - [E0CZ73_MOUSE]                                           | 17.65 | 2 | 2 | 2 | 6 | 1.26 | 1.39  | 1.10 | 1.48 | 1.17 | 1.92 | 1.51 | 2.15 | 1.69 | 2.11 | 1.67 | 1.54 | 1.22 | 31.59  | 5.87 |
| E9Q813 | Ras-GEF domain-containing family member 1B OS=Mus musculus GN=Rasgef1b PE=2 SV=1 - [E9Q813_MOUSE]     | 7.42  | 3 | 1 | 1 | 1 | 1.26 | 1.80  | 1.43 | 1.43 | 1.14 | 1.74 | 1.37 | 2.15 | 1.70 | 1.98 | 1.57 | 1.83 | 1.46 | 50.26  | 8.06 |
| D3Z4F2 | Protein Zfp819 (Fragment) OS=Mus musculus GN=Zfp819 PE=2 SV=1 - [D3Z4F2_MOUSE]                        | 12.12 | 2 | 1 | 1 | 1 | 0.97 | 0.98  | 1.00 | 1.01 | 1.04 | 1.74 | 1.78 | 2.16 | 2.21 | 1.77 | 1.82 | 1.60 | 1.65 | 11.49  | 5.48 |
| A6PWD2 | Isoform 4 of Forkhead-associated domain-containing protein 1 OS=Mus musculus GN=Fhad1 - [FHAD1_MOUSE] | 1.64  | 2 | 1 | 1 | 1 | 2.07 | 2.07  | 1.00 | 2.07 | 1.00 | 1.91 | 0.92 | 2.21 | 1.06 | 2.22 | 1.07 | 3.41 | 1.65 | 99.09  | 6.83 |

|        |                                                                                                                                   |       |   |   |    |     |      |       |       |      |      |      |      |      |      |      |      |      |      |        |      |
|--------|-----------------------------------------------------------------------------------------------------------------------------------|-------|---|---|----|-----|------|-------|-------|------|------|------|------|------|------|------|------|------|------|--------|------|
| Q9CY58 | Plasminogen activator inhibitor 1 RNA-binding protein<br>OS=Mus musculus<br>GN=Serbp1 PE=1<br>SV=2 -<br>[PAIRB_MOUSE]             | 48.40 | 2 | 2 | 17 | 101 | 2.01 | 1.14  | 0.57  | 1.39 | 0.69 | 1.89 | 0.94 | 2.23 | 1.11 | 2.01 | 1.01 | 1.48 | 0.74 | 44.69  | 8.54 |
| Q8VED5 | Keratin, type II cytoskeletal 79<br>OS=Mus musculus<br>GN=Krt79 PE=1 SV=2<br>-[K2C79_MOUSE]                                       | 4.90  | 3 | 1 | 3  | 4   | 1.75 | 1.20  | 0.68  | 5.33 | 3.05 | 1.41 | 0.80 | 2.27 | 1.29 | 1.77 | 1.01 | 1.43 | 0.82 | 57.52  | 7.69 |
| A2AIV8 | Caspase recruitment domain family, member 9<br>OS=Mus musculus<br>GN=Card9 PE=2 SV=1 -<br>[A2AIV8_MOUSE]                          | 3.54  | 1 | 1 | 1  | 2   | 2.26 | 24.62 | 10.88 | 5.75 | 2.55 | 6.67 | 2.94 | 2.28 | 1.00 | 3.17 | 1.41 | 1.48 | 0.65 | 62.42  | 5.73 |
| Q91XQ0 | Isoform 2 of Dynein heavy chain 8, axonemal<br>OS=Mus musculus<br>GN=Dnahc8<br>[DYH8_MOUSE]                                       | 0.36  | 2 | 1 | 1  | 1   | 3.22 | 30.33 | 9.40  | 5.20 | 1.61 | 5.60 | 1.73 | 2.28 | 0.70 | 1.92 | 0.60 | 1.41 | 0.44 | 479.85 | 6.13 |
| Q80YR6 | DNA endonuclease RBBP8<br>OS=Mus musculus<br>GN=Rbbp8 PE=1 SV=1 -<br>[COM1_MOUSE]                                                 | 0.78  | 1 | 1 | 1  | 1   | 1.70 | 0.73  | 0.43  | 5.82 | 3.42 | 1.20 | 0.70 | 2.32 | 1.36 | 1.27 | 0.75 | 2.13 | 1.25 | 100.77 | 6.68 |
| F6VV25 | Plectstrin homology domain-containing family O member 1 (Fragment)<br>OS=Mus musculus<br>GN=Plekho1 PE=2 SV=1 -<br>[F6VV25_MOUSE] | 7.98  | 1 | 1 | 1  | 1   | 0.99 | 1.08  | 1.09  | 1.09 | 1.10 | 1.51 | 1.53 | 2.33 | 2.36 | 1.93 | 1.96 | 1.39 | 1.41 | 29.41  | 8.81 |
| Q6NXL1 | Protein Sec24d<br>OS=Mus musculus<br>GN=Sec24d PE=2 SV=1 -<br>[Q6NXL1_MOUSE]                                                      | 2.71  | 1 | 1 | 1  | 1   | 2.03 | 2.53  | 1.25  | 3.45 | 1.70 | 2.81 | 1.38 | 2.34 | 1.15 | 2.10 | 1.04 | 3.10 | 1.53 | 112.60 | 7.18 |
| Q3TTY5 | Keratin, type II cytoskeletal 2 epidermal<br>OS=Mus musculus<br>GN=Krt2 PE=1 SV=1 -<br>[K22E_MOUSE]                               | 13.15 | 2 | 3 | 5  | 8   | 1.91 | 1.55  | 0.81  | 3.32 | 1.74 | 1.53 | 0.91 | 2.66 | 1.44 | 1.76 | 0.92 | 2.21 | 1.27 | 70.88  | 8.06 |
| Q8VGU8 | Olfactory receptor 1353<br>OS=Mus musculus<br>GN=Olfr1353 PE=2 SV=1 -<br>[Q8VGU8_MOUSE]                                           | 3.24  | 1 | 1 | 1  | 2   | 2.14 | 19.20 | 8.93  | 3.41 | 1.59 | 3.63 | 1.69 | 2.73 | 1.27 | 2.28 | 1.06 | 1.41 | 0.66 | 34.98  | 8.37 |
| Q80YF9 | Rho GTPase-activating protein 33<br>OS=Mus musculus<br>GN=Arhgap33 PE=1 SV=1 -<br>[RHG33_MOUSE]                                   | 4.83  | 4 | 2 | 4  | 10  | 1.02 | 1.30  | 1.26  | 1.18 | 1.15 | 0.87 | 0.86 | 3.36 | 3.37 | 2.56 | 2.59 | 1.71 | 1.73 | 139.71 | 9.19 |
| E9PUE6 | Transmembrane protein 145<br>OS=Mus musculus<br>GN=Tmem145 PE=2 SV=1 -<br>[E9PUE6_MOUSE]                                          | 5.51  | 2 | 2 | 2  | 3   | 0.89 | 1.04  | 1.17  | 0.96 | 1.07 | 1.14 | 1.27 | 3.93 | 4.39 | 3.27 | 3.67 | 1.66 | 1.87 | 62.79  | 8.75 |

|        |                                                                                                   |      |   |   |   |   |      |      |      |      |      |      |      |       |       |      |      |      |      |       |      |
|--------|---------------------------------------------------------------------------------------------------|------|---|---|---|---|------|------|------|------|------|------|------|-------|-------|------|------|------|------|-------|------|
| Q3UV17 | Keratin, type II<br>cytoskeletal 2 oral<br>OS=Mus musculus<br>GN=Krt76 PE=2 SV=1<br>-[K22O_MOUSE] | 5.22 | 4 | 1 | 4 | 7 | 2.65 | 1.15 | 0.43 | 8.16 | 3.07 | 1.83 | 0.69 | 4.15  | 1.56  | 2.58 | 0.97 | 3.36 | 1.27 | 62.81 | 8.43 |
| O70551 | SRSF protein kinase 1<br>OS=Mus musculus<br>GN=Srpk1 PE=1<br>SV=2 -<br>[SRPK1_MOUSE]              | 4.78 | 2 | 1 | 3 | 4 | 0.75 | 1.14 | 1.51 | 1.08 | 1.43 | 0.89 | 1.18 | 8.48  | 11.20 | 6.30 | 8.36 | 1.93 | 2.56 | 73.04 | 6.19 |
| E9PXF7 | Protein Gm14446<br>OS=Mus musculus<br>GN=Gm14446 PE=2<br>SV=1 -<br>[E9PXF7_MOUSE]                 | 4.04 | 2 | 1 | 2 | 5 | 1.07 | 0.75 | 0.70 | 2.07 | 1.94 | 3.63 | 3.39 | 10.23 | 9.56  | 8.60 | 8.08 | 3.88 | 3.64 | 54.44 | 8.16 |
